# Supplementary material for: Xylem cells rapidly sense and respond to nitrate to promote expansion
Source: Research Square preprint supplement (doi:10.21203/rs.3.rs-7685028/v2), 2025-10-28
Supplement: Supplementary file 1 [file b03e7d5c7f89196af0370b89.xlsx]

## Sheet: readme
Sheet Name	Description
S1A_2h	List of differentially expressed genes (False discovery rate or FDR<0.05 and Log2 fold change >1.0) for the comparison between two hours of nitrate treatment versus control from bulk RNA-seq of developing xylem. The genes are annotated based on the best description from UniProt, TAIR, and transcription factor database and their status after nitrate treatment are shown.
S1B_4h	List of differentially expressed genes (False discovery rate or FDR<0.05 and Log2 fold change >1.0) for the comparison between four hours of nitrate treatment versus control from bulk RNA-seq of developing xylem. The genes are annotated based on the best description from UniProt, TAIR, and transcription factor database and their status after nitrate treatment are shown.
S1C_8h	List of differentially expressed genes (False discovery rate or FDR<0.05 and Log2 fold change >1.0) for the comparison between eight hours of nitrate treatment versus control from bulk RNA-seq of developing xylem. The genes are annotated based on the best description from UniProt, TAIR, and transcription factor database and their status after nitrate treatment are shown.
S1D_12h	List of differentially expressed genes (False discovery rate or FDR<0.05 and Log2 fold change >1.0) for the comparison between twelve hours of nitrate treatment versus control from bulk RNA-seq of developing xylem. The genes are annotated based on the best description from UniProt, TAIR, and transcription factor database and their status after nitrate treatment are shown.
S1E_TimeBin	Time bins are created based on the appearance of a DEG for the first time after nitrate treatment.
S1F_Whole_Transcriptome_Gene_Coexpression_Network	Network centrality statistics for the genes in the co-expression network.
S1G_Clusterwise_GO_Gene_Coexpression_Network	Cluster wise significantly (FDR<0.01) enriched GO terms using all expressed genes (VST>0) as backgorund
S1H_TF-DEG_Gene_Coexpression_Subnetwork	Network centrality statistics for TF-DEG co-expression subnetwork.
References
[1]	Sundell D, Street NR, Kumar M, Mellerowicz EJ, Kucukoglu M, Johnsson C, et al. AspWood: high-spatial resolution transcriptome profiles reveal uncharacterized modularity of wood formation in Populus tremula. Plant Cell. 2017;29:1585-1604.
[2]	Varala K, Marshall-Colón A, Cirrone J, Brooks MD, Pasquino AV., Léran S, et al. Temporal transcriptional logic of dynamic regulatory networks underlying nitrogen signaling and use in plants. PNAS. 2018;115:6494-6499.
[3]	Vidal EA, Alvarez JM, Araus V, Riveras E, Brooks MD, Krouk G, et al. Nitrate in 2020: Thirty years from transport to signaling networks. Plant Cell. 2020;32:2094-2119.

## Sheet: S1A_2h
Gene_Id	Base_Mean	Log2_Fold_Change	False_Discovery_Rate	UniProt_Description	Best Arabidospsis hit	TAIR_description	TF family	Level_after_nitrate_treatment
Potra2n5c10864	14.7414	-1.54745	0.0211686	sp|O49651|LBD32_ARATH LOB domain-containing protein 32 OS=Arabidopsis thaliana OX=3702 GN=LBD32 PE=2 SV=1	AT2G42430	lateral organ boundaries-domain 16|ASL18,LBD16	AS2-LOB	Downregulated
Potra2n4c9349	118.403	1.0384	0.0432462	sp|Q9FKZ3|LBD36_ARATH LOB domain-containing protein 36 OS=Arabidopsis thaliana OX=3702 GN=LBD36 PE=2 SV=1	AT3G02550	LOB domain-containing protein 41|LBD41	AS2-LOB	Upregulated
Potra2n9c19330	189.571	2.17302	3.56711e-24	sp|Q9CA30|LBD42_ARATH LOB domain-containing protein 42 OS=Arabidopsis thaliana OX=3702 GN=LBD42 PE=2 SV=1	AT3G49940	LOB domain-containing protein 38|LBD38	AS2-LOB	Upregulated
Potra2n6c13502	21.6361	1.42944	0.0146612	sp|Q9LW31|FUS3_ARATH B3 domain-containing transcription factor FUS3 OS=Arabidopsis thaliana OX=3702 GN=FUS3 PE=1 SV=2	AT2G36080	AP2/B3-like transcriptional factor family protein	B3-Domain	Upregulated
Potra2n9c19481	162.75	1.93357	6.0684e-15	sp|Q84WK0|BH085_ARATH Transcription factor bHLH85 OS=Arabidopsis thaliana OX=3702 GN=BHLH85 PE=2 SV=1	AT2G42280	basic helix-loop-helix (bHLH) DNA-binding superfamily protein	bHLH	Upregulated
Potra2n1c685	57.991	1.85974	0.0112147	sp|Q9LSE2|ICE1_ARATH Transcription factor ICE1 OS=Arabidopsis thaliana OX=3702 GN=SCRM PE=1 SV=1	AT4G00870	basic helix-loop-helix (bHLH) DNA-binding superfamily protein	bHLH	Upregulated
Potra2n19c33457	107.64	1.48123	1.41748e-05	sp|Q9STJ7|BH118_ARATH Transcription factor bHLH118 OS=Arabidopsis thaliana OX=3702 GN=BHLH118 PE=2 SV=1	AT4G20970	basic helix-loop-helix (bHLH) DNA-binding superfamily protein	bHLH	Upregulated
Potra2n7c15464	70.6104	1.61404	1.50045e-06	sp|Q4KLY4|RING2_RAT E3 ubiquitin-protein ligase RING2 OS=Rattus norvegicus OX=10116 GN=Rnf2 PE=2 SV=1	AT1G03770	RING 1B|ATRING1B,RING1B	C2H2	Upregulated
Potra2n7c15630	44.705	1.01331	0.00440017	sp|Q9LG15|STKLC_ARATH Probable transcription factor At1g55950 OS=Arabidopsis thaliana OX=3702 GN=At1g55950 PE=1 SV=2	AT1G61730	DNA-binding storekeeper protein-related transcriptional regulator	GeBP	Upregulated
Potra2n1c1486	57.6904	1.00113	0.00713773	sp|O80933|SCL9_ARATH Scarecrow-like protein 9 OS=Arabidopsis thaliana OX=3702 GN=SCL9 PE=2 SV=1	AT3G13840	GRAS family transcription factor	GRAS	Upregulated
Potra2n10c21293	492.503	1.02647	2.49714e-06	sp|Q5Z5I4|GLK1_ORYSJ Probable transcription factor GLK1 OS=Oryza sativa subsp. japonica OX=39947 GN=GLK1 PE=2 SV=1	AT1G68670	myb-like transcription factor family protein	MYB-HB-like	Upregulated
Potra2n7c15824	83.847	1.26738	3.89112e-05	sp|Q9M0F8|NAC75_ARATH NAC domain-containing protein 75 OS=Arabidopsis thaliana OX=3702 GN=NAC075 PE=2 SV=1	AT1G01720	NAC (No Apical Meristem) domain transcriptional regulator superfamily protein|ANAC002,ATAF1	NAM	Upregulated
Potra2n1c723	292.077	1.25342	0.000223264	sp|Q9LVU8|RKD4_ARATH Protein RKD4 OS=Arabidopsis thaliana OX=3702 GN=RKD4 PE=3 SV=1	AT4G24020	NIN like protein 7	Nin-like	Upregulated
Potra2n2c5098	256.017	-1.19698	4.22013e-08		AT1G02020	nitroreductase family protein		Downregulated
Potra2n16c29392	56.2195	-1.06304	0.0410756	sp|E7CIP7|PME_SITOR Pectinesterase OS=Sitophilus oryzae OX=7048 GN=CE8-1 PE=1 SV=1	AT1G05310	Pectin lyase-like superfamily protein		Downregulated
Potra2n1c3617	16.8297	-2.23577	0.000803144	sp|Q5JMR9|TRXY_ORYSJ Thioredoxin Y, chloroplastic OS=Oryza sativa subsp. japonica OX=39947 GN=Os01g0963400 PE=3 SV=2	AT1G11530	C-terminal cysteine residue is changed to a serine 1|ATCXXS1,CXXS1		Downregulated
Potra2n3c7503	154.718	2.02981	0.0120003	sp|B8NI27|IMQJ_ASPFN Peptide transporter imqJ OS=Aspergillus flavus (strain ATCC 200026 / FGSC A1120 / NRRL 3357 / JCM 12722 / SRRC 167) OX=332952 GN=imqJ PE=2 SV=1	AT1G12110	nitrate transporter 1.1|ATNRT1,B-1,CHL1,CHL1-1,NRT1,NRT1.1		Upregulated
Potra2n15c28480	82.5364	4.73254	1.86397e-08	sp|P42432|NASA_BACSU Nitrate transporter OS=Bacillus subtilis (strain 168) OX=224308 GN=nasA PE=2 SV=2	AT1G12940	nitrate transporter2.5|ATNRT2.5,NRT2.5		Upregulated
Potra2n8c17773	170.465	-1.00211	0.00302652		AT1G15060	alpha/beta hydrolase family protein		Downregulated
Potra2n1c322	35.0239	1.43137	3.47188e-05		AT1G16170	ephrin-A3 protein		Upregulated
Potra2n1c318	17.6195	1.72908	0.0155032		AT1G16170	ephrin-A3 protein		Upregulated
Potra2n1c3307	1065.96	2.93265	4.88013e-132	sp|Q8BW70|UBP38_MOUSE Ubiquitin carboxyl-terminal hydrolase 38 OS=Mus musculus OX=10090 GN=Usp38 PE=1 SV=2	AT1G17110	ubiquitin-specific protease 15		Upregulated
Potra2n2c6137	881.092	2.59144	4.90884e-05	sp|Q93Z01|MIK_ARATH Inositol 3-kinase OS=Arabidopsis thaliana OX=3702 GN=At5g58730 PE=2 SV=1	AT1G19600	pfkB-like carbohydrate kinase family protein		Upregulated
Potra2n5c11357	182.827	3.21843	2.09895e-63	sp|F4KI56|SERCL_ARATH Metal-independent phosphoserine phosphatase OS=Arabidopsis thaliana OX=3702 GN=IPSP PE=1 SV=1	AT1G22170	Phosphoglycerate mutase family protein		Upregulated
Potra2n10c21465	391.421	-1.07358	0.0201818		AT1G23110	fold protein		Downregulated
Potra2n1c3167	185.446	1.017	0.00519153		AT1G30320	Remorin family protein		Upregulated
Potra2n5c11320	252.722	5.18525	4.45761e-06	sp|Q9ZRP7|SLD1_ARATH Delta(8)-fatty-acid desaturase 1 OS=Arabidopsis thaliana OX=3702 GN=SLD1 PE=1 SV=1	AT1G37130	nitrate reductase 2|ATNR2,B29,CHL3,NIA2,NIA2-1,NR,NR2		Upregulated
Potra2n2c5243	67.5193	1.40366	4.00086e-07	sp|Q03250|RBG7_ARATH Glycine-rich RNA-binding protein 7 OS=Arabidopsis thaliana OX=3702 GN=RBG7 PE=1 SV=1	AT1G47490	RNA-binding protein 47C|ATRBP47C,RBP47C		Upregulated
Potra2n15c28859	22.1519	1.37246	0.0286973	sp|Q5E5J8|UBIG_ALIF1 Ubiquinone biosynthesis O-methyltransferase OS=Aliivibrio fischeri (strain ATCC 700601 / ES114) OX=312309 GN=ubiG PE=3 SV=1	AT1G48600	S-adenosyl-L-methionine-dependent methyltransferases superfamily protein|AtPMEAMT,PMEAMT		Upregulated
Potra2n9c19654	218.169	2.5571	2.02633e-22	sp|Q58119|Y709_METJA Uncharacterized transporter MJ0709 OS=Methanocaldococcus jannaschii (strain ATCC 43067 / DSM 2661 / JAL-1 / JCM 10045 / NBRC 100440) OX=243232 GN=MJ0709 PE=3 SV=1	AT1G51340	MATE efflux family protein		Upregulated
Potra2n6c15267	64.6513	-1.42748	0.0183853	sp|Q55A09|Y9963_DICDI Probable serine/threonine-protein kinase DDB_G0272254 OS=Dictyostelium discoideum OX=44689 GN=DDB_G0272254 PE=3 SV=1	AT1G53430	Leucine-rich repeat transmembrane protein kinase		Downregulated
Potra2n1c679	17.254	1.92911	0.0154761	sp|O64639|Y2559_ARATH Receptor-like serine/threonine-protein kinase At2g45590 OS=Arabidopsis thaliana OX=3702 GN=At2g45590 PE=2 SV=1	AT1G56130	Leucine-rich repeat transmembrane protein kinase		Upregulated
Potra2n5c11517	13.5363	1.43219	0.0342502	sp|O13306|ERG1_CANGA Squalene monooxygenase OS=Candida glabrata (strain ATCC 2001 / CBS 138 / JCM 3761 / NBRC 0622 / NRRL Y-65) OX=284593 GN=ERG1 PE=3 SV=2	AT1G58440	FAD/NAD(P)-binding oxidoreductase family protein|SQE1,XF1		Upregulated
Potra2n11c23391	107.38	2.0052	0.00193399	sp|Q9FJU2|FBD37_ARATH Putative FBD-associated F-box protein At5g56700 OS=Arabidopsis thaliana OX=3702 GN=At5g56700 PE=2 SV=2	AT1G61330	FBD, F-box and Leucine Rich Repeat domains containing protein		Upregulated
Potra2n4c8639	76.2539	1.3735	0.0167366	sp|Q39202|RLK1_ARATH G-type lectin S-receptor-like serine/threonine-protein kinase RLK1 OS=Arabidopsis thaliana OX=3702 GN=RLK1 PE=2 SV=2	AT1G61610	S-locus lectin protein kinase family protein		Upregulated
Potra2n1c827	1005.15	3.04837	3.07838e-98	sp|Q5NVA2|TRXR1_PONAB Thioredoxin reductase 1, cytoplasmic OS=Pongo abelii OX=9601 GN=TXNRD1 PE=2 SV=3	AT1G63940	monodehydroascorbate reductase 6|MDAR6		Upregulated
Potra2n1c496	191.102	1.77333	1.72375e-23	sp|B4RC79|GLND_PHEZH Bifunctional uridylyltransferase/uridylyl-removing enzyme OS=Phenylobacterium zucineum (strain HLK1) OX=450851 GN=glnD PE=3 SV=1	AT1G69040	ACT domain repeat 4|ACR4		Upregulated
Potra2n10c21610	391.371	1.32884	2.04673e-05	sp|F4HZQ7|WTR5_ARATH WAT1-related protein At1g21890 OS=Arabidopsis thaliana OX=3702 GN=At1g21890 PE=2 SV=1	AT1G70260	nodulin MtN21 /EamA-like transporter family protein		Upregulated
Potra2n1c3844	37.2785	1.66311	0.000841923	sp|Q9LZN2|PILS6_ARATH Protein PIN-LIKES 6 OS=Arabidopsis thaliana OX=3702 GN=PILS6 PE=2 SV=1	AT1G76520	Auxin efflux carrier family protein		Upregulated
Potra2n2c5524	343.616	-1.06201	0.00865071	sp|Q0P5X1|LRIQ1_MOUSE Leucine-rich repeat and IQ domain-containing protein 1 OS=Mus musculus OX=10090 GN=Lrriq1 PE=2 SV=2	AT1G78230	Outer arm dynein light chain 1 protein		Downregulated
Potra2n1c3303	65.2331	1.84259	0.045325	sp|P10621|IPNS_STRCL Isopenicillin N synthase OS=Streptomyces clavuligerus OX=1901 GN=pcbC PE=3 SV=1	AT1G78440	gibberellin 2-beta-dioxygenase|ATGA2OX1,GA2OX1		Upregulated
Potra2n9c19145	566.561	4.50236	2.11349e-75	sp|Q9FK13|PDV1_ARATH Plastid division protein PDV1 OS=Arabidopsis thaliana OX=3702 GN=PDV1 PE=1 SV=1	AT2G16070	plastid division2|PDV2		Upregulated
Potra2n2c6179	29.7143	-1.39041	0.0267302	sp|Q687E1|NPP_HORVU Nucleotide pyrophosphatase/phosphodiesterase (Fragments) OS=Hordeum vulgare OX=4513 GN=npp PE=1 SV=2	AT2G16430	purple acid phosphatase 10|ATPAP10,PAP10		Downregulated
Potra2n1c1954	554.82	1.13593	6.5154e-53	sp|O49318|Y2317_ARATH Probable leucine-rich repeat receptor-like protein kinase At2g33170 OS=Arabidopsis thaliana OX=3702 GN=At2g33170 PE=2 SV=1	AT2G26980	CBL-interacting protein kinase 3|CIPK3,SnRK3.17		Upregulated
Potra2n9c18689	1175.93	3.32523	4.29773e-111	sp|P23101|XYLZ_PSEPU Toluate 1,2-dioxygenase electron transfer component OS=Pseudomonas putida OX=303 GN=xylZ PE=3 SV=1	AT2G27510	ferredoxin 3|ATFD3,FD3		Upregulated
Potra2n4c10189	353.001	5.18876	1.08498e-102	sp|P23101|XYLZ_PSEPU Toluate 1,2-dioxygenase electron transfer component OS=Pseudomonas putida OX=303 GN=xylZ PE=3 SV=1	AT2G27510	ferredoxin 3|ATFD3,FD3		Upregulated
Potra2n4c10074	273.286	1.50704	0.0395069	sp|B3FWT9|RDC4_METCM Cytochrome P450 monooxygenase rdc4 OS=Metacordyceps chlamydosporia OX=280754 GN=rdc4 PE=1 SV=1	AT2G27690	cytochrome P450, family 94, subfamily C, polypeptide 1|CYP94C1		Upregulated
Potra2n1c2120	47.5126	2.47789	2.65637e-20	sp|Q03326|OXIR_STRAT Probable oxidoreductase OS=Streptomyces antibioticus OX=1890 PE=3 SV=1	AT2G29260	NAD(P)-binding Rossmann-fold superfamily protein		Upregulated
Potra2n199s34916	99.6204	1.0606	0.000120394	sp|Q9VHD2|MAAI2_DROME Probable maleylacetoacetate isomerase 2 OS=Drosophila melanogaster OX=7227 GN=GstZ2 PE=1 SV=1	AT2G29420	glutathione S-transferase tau 7|ATGSTU7,GST25,GSTU7		Upregulated
Potra2n9c19920	103.163	1.60857	8.38797e-18	sp|Q6N8F3|PQQE_RHOPA PqqA peptide cyclase OS=Rhodopseudomonas palustris (strain ATCC BAA-98 / CGA009) OX=258594 GN=pqqE PE=3 SV=1	AT2G31955	cofactor of nitrate reductase and xanthine dehydrogenase 2|CNX2		Upregulated
Potra2n10c20373	674.399	-1.10335	1.28788e-10	sp|O80644|ACR9_ARATH ACT domain-containing protein ACR9 OS=Arabidopsis thaliana OX=3702 GN=ACR9 PE=2 SV=1	AT2G36840	ACT-like superfamily protein		Downregulated
Potra2n16c30193	70.6442	1.27332	0.0155419	sp|Q84M96|ALKR2_ARATH Probable aldo-keto reductase 2 OS=Arabidopsis thaliana OX=3702 GN=AGD2 PE=2 SV=1	AT2G37790	NAD(P)-linked oxidoreductase superfamily protein		Upregulated
Potra2n6c14477	1105.32	1.04455	8.19687e-07	sp|F4HW02|GAT1_ARATH GABA transporter 1 OS=Arabidopsis thaliana OX=3702 GN=GAT1 PE=1 SV=1	AT2G38120	Transmembrane amino acid transporter family protein		Upregulated
Potra2n17c31885	33.8638	2.43286	0.0310357	sp|Q6LRI5|TPMT_PHOPR Thiopurine S-methyltransferase OS=Photobacterium profundum (strain SS9) OX=298386 GN=tpm PE=3 SV=1	AT2G43940	S-adenosyl-L-methionine-dependent methyltransferases superfamily protein|ATHOL3,HOL3		Upregulated
Potra2n14c27478	33.5255	1.03137	0.00520857	sp|O82266|SWA1_ARATH Protein SLOW WALKER 1 OS=Arabidopsis thaliana OX=3702 GN=SWA1 PE=2 SV=1	AT2G47990	transducin family protein / WD-40 repeat family protein|EDA13,EDA19,SWA1		Upregulated
Potra2n17c31393	388.336	-1.03018	0.0253444	sp|Q21407|GPCP1_CAEEL Putative glycerophosphocholine phosphodiesterase GPCPD1 homolog 1 OS=Caenorhabditis elegans OX=6239 GN=gpcp-1 PE=3 SV=2	AT3G02040	senescence-related gene 3|SRG3		Downregulated
Potra2n14c27467	44.1445	-1.3186	0.031658	sp|A7ZMF8|AROD_ECO24 3-dehydroquinate dehydratase OS=Escherichia coli O139:H28 (strain E24377A / ETEC) OX=331111 GN=aroD PE=3 SV=1	AT3G06350	dehydroquinate dehydratase, putative / shikimate dehydrogenase|EMB3004,MEE32		Downregulated
Potra2n18c32125	36.2567	1.51311	0.0120258		AT3G15760	cytochrome P450 family protein		Upregulated
Potra2n14c26487	3088.41	-1.22722	0.00966536	sp|B4GHE3|ASPG2_DROPE L-asparaginase-like protein GL17509 OS=Drosophila persimilis OX=7234 GN=GL17509 PE=3 SV=1	AT3G16150	N-terminal nucleophile aminohydrolases (Ntn hydrolases) superfamily protein		Downregulated
Potra2n8c18536	70.7289	-1.41617	2.49304e-05	sp|O04023|SRC2_ARATH Protein SRC2 homolog OS=Arabidopsis thaliana OX=3702 GN=SRC2 PE=1 SV=1	AT3G16510	Calcium-dependent lipid-binding (CaLB domain) family protein		Downregulated
Potra2n3c7064	142.989	3.25677	2.23513e-38	sp|Q0D673|P2C62_ORYSJ Probable protein phosphatase 2C 62 OS=Oryza sativa subsp. japonica OX=39947 GN=Os07g0507000 PE=2 SV=1	AT3G16560	Protein phosphatase 2C family protein		Upregulated
Potra2n8c17549	72.928	1.40739	0.000193302	sp|P83326|PMEI_ACTDE Pectinesterase inhibitor OS=Actinidia deliciosa OX=3627 GN=PMEI PE=1 SV=2	AT3G17130	Plant invertase/pectin methylesterase inhibitor superfamily protein		Upregulated
Potra2n12c24072	3635.53	-1.52694	1.61845e-05	sp|O97860|PPA5_RABIT Tartrate-resistant acid phosphatase type 5 OS=Oryctolagus cuniculus OX=9986 GN=ACP5 PE=2 SV=1	AT3G17790	purple acid phosphatase 17|ATACP5,ATPAP17,PAP17		Downregulated
Potra2n4c9742	86.4518	1.27896	0.0122828	sp|Q5MNH6|LOLO2_EPIUN 2-oxoglutarate-dependent dioxygenase lolO2 OS=Epichloe uncinata OX=5050 GN=lolO2 PE=1 SV=1	AT3G19000	2-oxoglutarate (2OG) and Fe(II)-dependent oxygenase superfamily protein		Upregulated
Potra2n15c29046	72.0696	-1.10651	0.0338038	sp|Q8J0I8|AOX_YARLI Alternative oxidase, mitochondrial OS=Yarrowia lipolytica (strain CLIB 122 / E 150) OX=284591 GN=AOX PE=3 SV=1	AT3G22370	alternative oxidase 1A|AOX1A,ATAOX1A		Downregulated
Potra2n11c22562	27.6229	-1.76976	0.0345826	sp|Q9P6J2|PCL1_SCHPO Fe(2+)/Mn(2+) transporter pcl1 OS=Schizosaccharomyces pombe (strain 972 / ATCC 24843) OX=284812 GN=pcl1 PE=1 SV=1	AT3G25190	Vacuolar iron transporter (VIT) family protein		Downregulated
Potra2n10c21240	145.795	1.04983	0.0152747	sp|O73792|TIE1_DANRE Tyrosine-protein kinase receptor Tie-1 (Fragment) OS=Danio rerio OX=7955 GN=tie1 PE=2 SV=1	AT3G25560	NSP-interacting kinase 2|NIK2		Upregulated
Potra2n1c2895	153.912	4.15549	6.57641e-12	sp|A7N6K9|CLCA_VIBCB H(+)/Cl(-) exchange transporter ClcA OS=Vibrio campbellii (strain ATCC BAA-1116 / BB120) OX=338187 GN=clcA PE=3 SV=1	AT3G27170	chloride channel B|ATCLC-B,CLC-B		Upregulated
Potra2n4c9465	865.481	3.27019	1.54219e-112	sp|C0MFB5|LDH_STRS7 L-lactate dehydrogenase OS=Streptococcus equi subsp. zooepidemicus (strain H70) OX=553483 GN=ldh PE=3 SV=1	AT3G47520	malate dehydrogenase|MDH		Upregulated
Potra2n12c24465	34.5228	1.33358	0.0420349	sp|A4D9R2|PYR3_ASPFU Cytochrome P450 monooxygenase pyr3 OS=Neosartorya fumigata (strain ATCC MYA-4609 / Af293 / CBS 101355 / FGSC A1100) OX=330879 GN=pyr3 PE=1 SV=1	AT3G48310	cytochrome P450, family 71, subfamily A, polypeptide 22|CYP71A22		Upregulated
Potra2n9c19486	922.258	2.42292	4.29773e-111	sp|Q7Z494|NPHP3_HUMAN Nephrocystin-3 OS=Homo sapiens OX=9606 GN=NPHP3 PE=1 SV=1	AT3G52140	tetratricopeptide repeat (TPR)-containing protein		Upregulated
Potra2n10c20757	43.3961	-1.34148	0.00724878	sp|Q6ICW6|WNK11_ARATH Probable serine/threonine-protein kinase WNK11 OS=Arabidopsis thaliana OX=3702 GN=WNK11 PE=2 SV=1	AT3G55950	CRINKLY4 related 3|ATCRR3,CCR3		Downregulated
Potra2n16c29536	34.6694	-1.14375	0.0352673	sp|Q9LDH1|SIB1_ARATH Sigma factor binding protein 1, chloroplastic OS=Arabidopsis thaliana OX=3702 GN=SIB1 PE=1 SV=1	AT3G56710	sigma factor binding protein 1		Downregulated
Potra2n5c11037	261.378	3.20837	7.23218e-76		AT3G59090	tobamovirus multiplication protein		Upregulated
Potra2n14c27006	2683.25	4.76927	3.30186e-47	sp|Q2YY67|TDCB_STAAB L-threonine dehydratase catabolic TdcB OS=Staphylococcus aureus (strain bovine RF122 / ET3-1) OX=273036 GN=tdcB PE=3 SV=2	AT3G61440	cysteine synthase C1|ARATH;BSAS3;1,ATCYSC1,CYSC1		Upregulated
Potra2n14c27409	2586.38	1.11601	6.57641e-12	sp|Q3J7X9|HLDD_NITOC ADP-L-glycero-D-manno-heptose-6-epimerase OS=Nitrosococcus oceani (strain ATCC 19707 / BCRC 17464 / NCIMB 11848 / C-107) OX=323261 GN=hldD PE=3 SV=1	AT3G62830	NAD(P)-binding Rossmann-fold superfamily protein|ATUXS2,AUD1,UXS2		Upregulated
Potra2n2c6001	26.7066	3.15669	1.1489e-08	sp|Q8W4K5|VAB_ARATH VAN3-binding protein OS=Arabidopsis thaliana OX=3702 GN=VAB PE=1 SV=1	AT3G63300	FORKED 1|FKD1		Upregulated
Potra2n14c27135	562.713	1.41808	2.06298e-09	sp|Q9M160|Y4095_ARATH Uncharacterized protein At4g00950 OS=Arabidopsis thaliana OX=3702 GN=At4g00950 PE=2 SV=1	AT4G00950	hypothetical protein (DUF688)|MEE47		Upregulated
Potra2n2c4565	55.0591	1.16563	0.0489604	sp|Q9M349|LEA37_ARATH Late embryogenesis abundant protein 37 OS=Arabidopsis thaliana OX=3702 GN=LEA37 PE=2 SV=1	AT4G02380	senescence-associated gene 21|AtLEA5,SAG21		Upregulated
Potra2n14c27393	146.808	3.11583	6.10977e-44	sp|Q9SRX6|LEA2_ARATH Late embryogenis abundant protein 2 OS=Arabidopsis thaliana OX=3702 GN=LEA2 PE=2 SV=1	AT4G02380	senescence-associated gene 21|AtLEA5,SAG21		Upregulated
Potra2n2c4551	99.3387	1.69402	9.11676e-20		AT4G02425	LYR motif protein		Upregulated
Potra2n4c8518	442.37	1.48499	2.8029e-07	sp|Q00216|TIGA_ASPNG Protein disulfide-isomerase tigA OS=Aspergillus niger OX=5061 GN=tigA PE=2 SV=1	AT4G04610	APS reductase 1|APR,APR1,ATAPR1,PRH19		Upregulated
Potra2n4c8686	153.141	-1.04501	7.63217e-05	sp|P57624|CYSQ_BUCAI 3'(2'),5'-bisphosphate nucleotidase CysQ OS=Buchnera aphidicola subsp. Acyrthosiphon pisum (strain APS) OX=107806 GN=cysQ PE=3 SV=1	AT4G05090	Inositol monophosphatase family protein		Downregulated
Potra2n1c3259	3765.65	2.06659	2.03426e-68	sp|Q6NRG5|NDOR1_XENLA NADPH-dependent diflavin oxidoreductase 1 OS=Xenopus laevis OX=8355 GN=ndor1 PE=2 SV=1	AT4G05390	root FNR 1|ATRFNR1,RFNR1		Upregulated
Potra2n5c11091	139.164	1.22071	8.94549e-08	sp|P46559|CKB2_CAEEL Choline kinase B2 OS=Caenorhabditis elegans OX=6239 GN=ckb-2 PE=1 SV=2	AT4G09760	Protein kinase superfamily protein		Upregulated
Potra2n15c28493	41.9849	-1.09309	0.0268637	sp|Q5REY7|UBXN7_PONAB UBX domain-containing protein 7 OS=Pongo abelii OX=9601 GN=UBXN7 PE=2 SV=2	AT4G10790	UBX domain-containing protein		Downregulated
Potra2n4c8622	21.3752	1.1625	0.0133567	sp|Q9LW83|CE101_ARATH G-type lectin S-receptor-like serine/threonine-protein kinase CES101 OS=Arabidopsis thaliana OX=3702 GN=CES101 PE=2 SV=2	AT4G11530	cysteine-rich RLK (RECEPTOR-like protein kinase) 34|CRK34		Upregulated
Potra2n2c4985	45.8344	-1.03544	0.00809614	sp|P50392|PA24A_DANRE Cytosolic phospholipase A2 OS=Danio rerio OX=7955 GN=pla2g4a PE=2 SV=1	AT4G11610	C2 calcium/lipid-binding plant phosphoribosyltransferase family protein		Downregulated
Potra2n2c4598	40.4428	1.06862	0.0228206		AT4G13030	P-loop containing nucleoside triphosphate hydrolases superfamily protein		Upregulated
Potra2n8c18221	28.301	1.39179	0.00642333	sp|Q5ZLQ4|IREB2_CHICK Iron-responsive element-binding protein 2 OS=Gallus gallus OX=9031 GN=IREB2 PE=2 SV=1	AT4G13430	isopropyl malate isomerase large subunit 1|ATLEUC1,IIL1		Upregulated
Potra2n8c18105	58.832	1.32756	0.000193302	sp|C0LGU5|Y5457_ARATH Probable LRR receptor-like serine/threonine-protein kinase At5g45780 OS=Arabidopsis thaliana OX=3702 GN=At5g45780 PE=1 SV=1	AT4G14580	CBL-interacting protein kinase 4|CIPK4,SnRK3.3		Upregulated
Potra2n5c12431	80.845	1.33421	8.18332e-05	sp|P46493|ILVA_HAEIN L-threonine dehydratase biosynthetic IlvA OS=Haemophilus influenzae (strain ATCC 51907 / DSM 11121 / KW20 / Rd) OX=71421 GN=ilvA PE=3 SV=1	AT4G14880	O-acetylserine (thiol) lyase (OAS-TL) isoform A1		Upregulated
Potra2n1c1053	998.796	1.17585	4.25327e-26	sp|Q43744|MDHM_BRANA Malate dehydrogenase, mitochondrial OS=Brassica napus OX=3708 GN=MDH PE=2 SV=1	AT4G17260	Lactate/malate dehydrogenase family protein		Upregulated
Potra2n14c26937	686.083	1.19461	0.0354627	sp|Q01317|NUC2_NEUCR Ankyrin repeat protein nuc-2 OS=Neurospora crassa (strain ATCC 24698 / 74-OR23-1A / CBS 708.71 / DSM 1257 / FGSC 987) OX=367110 GN=nuc-2 PE=4 SV=2	AT4G22990	Major Facilitator Superfamily with SPX (SYG1/Pho81/XPR1) domain-containing protein		Upregulated
Potra2n1c831	993.458	1.02042	0.000113005	sp|Q12554|PGLRC_ASPNG Probable endopolygalacturonase C OS=Aspergillus niger OX=5061 GN=pgaC PE=3 SV=1	AT4G23500	Pectin lyase-like superfamily protein		Upregulated
Potra2n18c32440	89.0912	1.54861	0.0207522	sp|P33693|EXOK_RHIME Endo-1,3-1,4-beta-glycanase ExoK OS=Rhizobium meliloti (strain 1021) OX=266834 GN=exoK PE=1 SV=1	AT4G25810	xyloglucan endotransglycosylase 6|XTH23,XTR6		Upregulated
Potra2n426s35633	140.54	1.17693	0.000928729	sp|Q8GXI9|PV42B_ARATH SNF1-related protein kinase regulatory subunit gamma-like PV42b OS=Arabidopsis thaliana OX=3702 GN=PV42B PE=2 SV=1	AT4G27460	Cystathionine beta-synthase (CBS) family protein		Upregulated
Potra2n6c12957	1065.56	1.42187	5.46095e-40	sp|Q9WTR8|PHLP1_RAT PH domain leucine-rich repeat protein phosphatase 1 OS=Rattus norvegicus OX=10116 GN=Phlpp1 PE=1 SV=1	AT4G31860	Protein phosphatase 2C family protein		Upregulated
Potra2n6c13008	184.093	1.03079	2.73219e-10	sp|Q7TSV6|AATC2_MOUSE Putative aspartate aminotransferase, cytoplasmic 2 OS=Mus musculus OX=10090 GN=Got1l1 PE=2 SV=1	AT4G31990	aspartate aminotransferase 5|AAT3,ASP5,ATAAT1		Upregulated
Potra2n7c16596	254.591	-1.17079	0.0448893	sp|Q6DC77|MPRGB_DANRE Membrane progestin receptor gamma-B OS=Danio rerio OX=7955 GN=paqr5b PE=2 SV=1	AT4G37680	heptahelical protein 4		Downregulated
Potra2n4c10024	18.5935	2.70134	0.0141601	sp|P25333|HAL4_YEAST Serine/threonine-protein kinase HAL4/SAT4 OS=Saccharomyces cerevisiae (strain ATCC 204508 / S288c) OX=559292 GN=SAT4 PE=1 SV=1	AT4G38470	ACT-like protein tyrosine kinase family protein		Upregulated
Potra2n6c14263	136.833	-1.074	1.45506e-07	sp|Q01266|YHYC_PSESN Uncharacterized protein in hyuC 3'region (Fragment) OS=Pseudomonas sp. (strain NS671) OX=29441 PE=3 SV=2	AT5G03555	permease, cytosine/purines, uracil, thiamine, allantoin family protein		Downregulated
Potra2n6c15083	1294.11	1.39187	2.30904e-39	sp|O34849|YERD_BACSU Glutamate synthase large subunit-like protein YerD OS=Bacillus subtilis (strain 168) OX=224308 GN=yerD PE=3 SV=1	AT5G04140	glutamate synthase 1|FD-GOGAT,GLS1,GLU1,GLUS		Upregulated
Potra2n10c20416	35.155	-1.18348	0.0027897	sp|Q9R189|UN13D_RAT Protein unc-13 homolog D OS=Rattus norvegicus OX=10116 GN=Unc13d PE=1 SV=1	AT5G04220	Calcium-dependent lipid-binding (CaLB domain) family protein|ATSYTC,NTMC2T1.3,NTMC2TYPE1.3,SYT3,SYTC		Downregulated
Potra2n1c2237	1079.95	1.03732	2.33022e-11	sp|P38500|NIR_BETPN Ferredoxin--nitrite reductase, chloroplastic OS=Betula pendula OX=3505 GN=NIR1 PE=2 SV=1	AT5G04590	sulfite reductase|SIR		Upregulated
Potra2n10c20792	330.842	1.11437	8.14293e-12	sp|P81898|PNAA_PRUDU Peptide-N4-(N-acetyl-beta-glucosaminyl)asparagine amidase A OS=Prunus dulcis OX=3755 PE=1 SV=2	AT5G05480	Peptide-N4-(N-acetyl-beta-glucosaminyl)asparagine amidase A protein		Upregulated
Potra2n9c18949	1365.18	-1.13542	0.0189328	sp|F4J1Q9|AVT1I_ARATH Amino acid transporter AVT1I OS=Arabidopsis thaliana OX=3702 GN=AVT1I PE=3 SV=1	AT5G09220	amino acid permease 2|AAP2		Downregulated
Potra2n7c15499	316.294	-1.00039	1.1691e-06	sp|Q9FIX3|PP407_ARATH Pentatricopeptide repeat-containing protein At5g39710 OS=Arabidopsis thaliana OX=3702 GN=EMB2745 PE=2 SV=1	AT5G09315	vacuolar sorting protein 9 domain protein		Downregulated
Potra2n7c15864	558.823	1.35588	1.46759e-31	sp|P42696|RBM34_HUMAN RNA-binding protein 34 OS=Homo sapiens OX=9606 GN=RBM34 PE=1 SV=2	AT5G10350	RNA-binding (RRM/RBD/RNP motifs) family protein		Upregulated
Potra2n3c6974	286.568	1.84828	1.35451e-42	sp|Q24625|G6PD_DROSI Glucose-6-phosphate 1-dehydrogenase (Fragment) OS=Drosophila simulans OX=7240 GN=Zw PE=2 SV=1	AT5G13110	glucose-6-phosphate dehydrogenase 2|G6PD2		Upregulated
Potra2n1c494	2689.7	4.49196	4.50776e-130	sp|Q24625|G6PD_DROSI Glucose-6-phosphate 1-dehydrogenase (Fragment) OS=Drosophila simulans OX=7240 GN=Zw PE=2 SV=1	AT5G13110	glucose-6-phosphate dehydrogenase 2|G6PD2		Upregulated
Potra2n8c16718	82.8889	1.19282	0.00711551	sp|Q0P5M9|MFS10_BOVIN Major facilitator superfamily domain-containing protein 10 OS=Bos taurus OX=9913 GN=MFSD10 PE=2 SV=1	AT5G13750	zinc induced facilitator-like 1|ZIFL1		Upregulated
Potra2n17c30668	285.43	1.13167	0.0420349	sp|J7SZ64|TRPDC_CLOS1 Tryptophan decarboxylase OS=Clostridium sporogenes (strain ATCC 15579) OX=471871 GN=CLOSPO_02083 PE=1 SV=1	AT5G17330	glutamate decarboxylase|GAD,GAD1		Upregulated
Potra2n13c25668	19.4054	1.87645	0.00642377	sp|C5BDY7|MDTK_EDWI9 Multidrug resistance protein MdtK OS=Edwardsiella ictaluri (strain 93-146) OX=634503 GN=mdtK PE=3 SV=1	AT5G17700	MATE efflux family protein		Upregulated
Potra2n18c32565	3046.86	1.08772	5.37875e-19	sp|Q7TSV6|AATC2_MOUSE Putative aspartate aminotransferase, cytoplasmic 2 OS=Mus musculus OX=10090 GN=Got1l1 PE=2 SV=1	AT5G19550	aspartate aminotransferase 2|AAT2,ASP2		Upregulated
Potra2n15c27976	99.7458	1.43933	1.72204e-16	sp|A0A0D3QS98|NOT1P_XENLA Palmitoleoyl-protein carboxylesterase notum1' OS=Xenopus laevis OX=8355 GN=notum1' PE=2 SV=1	AT5G23870	Pectinacetylesterase family protein		Upregulated
Potra2n5c12621	682.776	1.78439	3.51678e-29		AT5G27760	Hypoxia-responsive family protein		Upregulated
Potra2n17c30939	178.539	-1.15596	0.000100633	sp|F4I8K2|RBL8_ARATH RHOMBOID-like protein 8 OS=Arabidopsis thaliana OX=3702 GN=KOM PE=2 SV=1	AT5G38510	Rhomboid-related intramembrane serine protease family protein		Downregulated
Potra2n700s36526	177.599	3.50888	1.50782e-65	sp|P21639|COBI_SINSX Precorrin-2 C(20)-methyltransferase OS=Sinorhizobium sp. OX=42445 GN=cobI PE=1 SV=2	AT5G40850	urophorphyrin methylase 1		Upregulated
Potra2n2c4957	232.061	1.54337	2.05341e-35	sp|O00102|UBC7_SCHPO Ubiquitin-conjugating enzyme E2-18 kDa OS=Schizosaccharomyces pombe (strain 972 / ATCC 24843) OX=284812 GN=ubc7 PE=1 SV=2	AT5G41340	ubiquitin conjugating enzyme 4|ATUBC4,UBC4		Upregulated
Potra2n3c7270	1184.46	2.18445	4.07267e-54	sp|Q55702|Y229_SYNY3 Uncharacterized oxidoreductase slr0229 OS=Synechocystis sp. (strain PCC 6803 / Kazusa) OX=1111708 GN=slr0229 PE=3 SV=1	AT5G41670	6-phosphogluconate dehydrogenase family protein		Upregulated
Potra2n1c796	2371.26	3.87659	1.68989e-115	sp|Q55702|Y229_SYNY3 Uncharacterized oxidoreductase slr0229 OS=Synechocystis sp. (strain PCC 6803 / Kazusa) OX=1111708 GN=slr0229 PE=3 SV=1	AT5G41670	6-phosphogluconate dehydrogenase family protein		Upregulated
Potra2n1c2361	187.085	1.63974	6.80343e-13	sp|P46154|FADH_PSEPU Glutathione-independent formaldehyde dehydrogenase OS=Pseudomonas putida OX=303 GN=fdhA PE=1 SV=3	AT5G43940	GroES-like zinc-binding dehydrogenase family protein|ADH2,ATGSNOR1,GSNOR,HOT5,PAR2		Upregulated
Potra2n650s36268	45.0656	1.73563	0.000281886	sp|O07737|Y1895_MYCTU Probable zinc-binding alcohol dehydrogenase Rv1895 OS=Mycobacterium tuberculosis (strain ATCC 25618 / H37Rv) OX=83332 GN=Rv1895 PE=1 SV=1	AT5G43940	GroES-like zinc-binding dehydrogenase family protein|ADH2,ATGSNOR1,GSNOR,HOT5,PAR2		Upregulated
Potra2n3c6882	177.012	1.35767	0.000219635	sp|Q9FKV5|MS5L1_ARATH Protein POLLENLESS 3-LIKE 1 OS=Arabidopsis thaliana OX=3702 GN=At5g44330 PE=2 SV=1	AT5G48850	Tetratricopeptide repeat (TPR)-like superfamily protein|ATSDI1		Upregulated
Potra2n8c17602	20.6089	1.47341	0.000262703	sp|B0YBJ3|BGLK_ASPFC Probable beta-glucosidase K OS=Neosartorya fumigata (strain CEA10 / CBS 144.89 / FGSC A1163) OX=451804 GN=bglK PE=3 SV=1	AT5G49360	beta-xylosidase 1|ATBXL1,BXL1		Upregulated
Potra2n2c5397	111.057	1.38636	0.0151513	sp|F4HW02|GAT1_ARATH GABA transporter 1 OS=Arabidopsis thaliana OX=3702 GN=GAT1 PE=1 SV=1	AT5G49630	amino acid permease 6|AAP6		Upregulated
Potra2n15c28441	129.221	6.01112	1.84466e-16	sp|Q7XK12|NAR22_ORYSJ Probable high-affinity nitrate transporter-activating protein 2.2 OS=Oryza sativa subsp. japonica OX=39947 GN=NAR2.2 PE=2 SV=1	AT5G50200	nitrate transmembrane transporter|ATNRT3.1,NRT3.1,WR3		Upregulated
Potra2n15c28440	167.928	6.20118	2.26829e-22	sp|Q7XK12|NAR22_ORYSJ Probable high-affinity nitrate transporter-activating protein 2.2 OS=Oryza sativa subsp. japonica OX=39947 GN=NAR2.2 PE=2 SV=1	AT5G50200	nitrate transmembrane transporter|ATNRT3.1,NRT3.1,WR3		Upregulated
Potra2n12c23912	708.112	2.14183	3.70566e-21	sp|Q58931|TRXB_METJA Putative thioredoxin reductase OS=Methanocaldococcus jannaschii (strain ATCC 43067 / DSM 2661 / JAL-1 / JCM 10045 / NBRC 100440) OX=243232 GN=MJ1536 PE=3 SV=1	AT5G53460	NADH-dependent glutamate synthase 1|GLT1		Upregulated
Potra2n12c23799	281.179	-1.87378	4.29966e-08	sp|Q06593|OPT2_YEAST Oligopeptide transporter 2 OS=Saccharomyces cerevisiae (strain ATCC 204508 / S288c) OX=559292 GN=OPT2 PE=1 SV=1	AT5G53510	oligopeptide transporter 9|ATOPT9,OPT9		Downregulated
Potra2n12c23757	63.4127	1.19849	2.55839e-05	sp|Q9LS39|CCR4C_ARATH Carbon catabolite repressor protein 4 homolog 3 OS=Arabidopsis thaliana OX=3702 GN=CCR4-3 PE=2 SV=2	AT5G54130	Calcium-binding endonuclease/exonuclease/phosphatase family		Upregulated
Potra2n15c28643	34.7812	3.99531	6.60861e-19		AT5G62720	Integral membrane HPP family protein		Upregulated
Potra2n17c31519	23.1546	2.16106	7.24708e-08	sp|B0T7X2|LLDD_CAUSK L-lactate dehydrogenase OS=Caulobacter sp. (strain K31) OX=366602 GN=lldD PE=3 SV=1	AT5G64250	Aldolase-type TIM barrel family protein		Upregulated
Potra2n17c31530	463.879	1.51644	8.65268e-57	sp|C0LGQ4|MDIS2_ARATH Protein MALE DISCOVERER 2 OS=Arabidopsis thaliana OX=3702 GN=MDIS2 PE=1 SV=1	AT5G64290	dicarboxylate transport 2.1|DCT,DIT2.1		Upregulated
Potra2n7c16541	571.107	-1.0406	8.87742e-10	sp|Q54D75|Y2550_DICDI Probable cyclin-dependent serine/threonine-protein kinase DDB_G0292550 OS=Dictyostelium discoideum OX=44689 GN=DDB_G0292550 PE=3 SV=1	AT5G65530	Protein kinase superfamily protein		Downregulated
Potra2n5c11625	311.3	1.20505	3.28964e-19	sp|Q9SD62|Y3471_ARATH Putative receptor-like protein kinase At3g47110 OS=Arabidopsis thaliana OX=3702 GN=At3g47110 PE=3 SV=1	AT5G66850	mitogen-activated protein kinase kinase kinase 5|MAPKKK5		Upregulated
Potra2n7c16256	62.0168	1.02517	0.0234123	sp|C0LGK9|Y2242_ARATH Probable LRR receptor-like serine/threonine-protein kinase At2g24230 OS=Arabidopsis thaliana OX=3702 GN=At2g24230 PE=1 SV=1	AT5G67080	mitogen-activated protein kinase kinase kinase 19|MAPKKK19		Upregulated
Potra2n14c27340	61.0172	1.14	0.000252427	sp|A0JNA8|PAXI1_BOVIN PAX-interacting protein 1 OS=Bos taurus OX=9913 GN=PAXIP1 PE=2 SV=1	AT4G02110	transcription coactivator	PHD	Upregulated
Potra2n6c14860	28.7521	1.69269	0.00235071		AT2G12646	PLATZ transcription factor family protein	PLATZ	Upregulated
Potra2n1c366	26.9927	2.11024	2.49304e-05	sp|Q93WV7|WRK67_ARATH Probable WRKY transcription factor 67 OS=Arabidopsis thaliana OX=3702 GN=WRKY67 PE=2 SV=1	AT1G80840	WRKY DNA-binding protein 40|ATWRKY40,WRKY40	WRKY	Upregulated
Potra2n5c10502	69.3917	1.98336	3.28151e-09		AT1G21000	PLATZ transcription factor family protein	Znf-B	Upregulated

## Sheet: S1B_4h
Gene_Id	Base_Mean	Log2_Fold_Change	False_Discovery_Rate	UniProt_Description	Best Arabidospsis hit	TAIR_description	TF family	Level_after_nitrate_treatment
Potra2n2c5915	143.285	1.17229	0.00237162	sp|O70511|ANK3_RAT Ankyrin-3 OS=Rattus norvegicus OX=10116 GN=Ank3 PE=1 SV=3	AT5G45110	NPR1-like protein 3	ABTB	Upregulated
Potra2n8c16727	33.8862	-1.30477	0.00211174	sp|Q6PV67|SNZ_ARATH AP2-like ethylene-responsive transcription factor SNZ OS=Arabidopsis thaliana OX=3702 GN=SNZ PE=2 SV=1	AT3G54320	Integrase-type DNA-binding superfamily protein|ASML1,ATWRI1,WRI,WRI1	AP2-EREBP	Downregulated
Potra2n3c7136	355.282	1.1955	2.65559e-06	sp|Q9SK67|EF120_ARATH Ethylene-responsive transcription factor ERF120 OS=Arabidopsis thaliana OX=3702 GN=ERF120 PE=2 SV=1	AT4G17500	ethylene responsive element binding factor 1|ATERF-1,ERF-1	AP2-EREBP	Upregulated
Potra2n2c5831	51.2196	1.03286	0.0421652	sp|Q6PV68|SMZ_ARATH AP2-like ethylene-responsive transcription factor SMZ OS=Arabidopsis thaliana OX=3702 GN=SMZ PE=2 SV=1	AT5G50080	ethylene response factor 110|ERF110	AP2-EREBP	Upregulated
Potra2n3c7135	118.801	1.66905	0.00247113	sp|Q8RZX9|Y1934_ORYSJ AP2/ERF and B3 domain-containing protein Os01g0693400 OS=Oryza sativa subsp. japonica OX=39947 GN=Os01g0693400 PE=2 SV=1	AT5G51190	Integrase-type DNA-binding superfamily protein	AP2-EREBP	Upregulated
Potra2n6c13502	21.6361	1.36488	0.0423282	sp|Q9LW31|FUS3_ARATH B3 domain-containing transcription factor FUS3 OS=Arabidopsis thaliana OX=3702 GN=FUS3 PE=1 SV=2	AT2G36080	AP2/B3-like transcriptional factor family protein	B3-Domain	Upregulated
Potra2n9c19481	162.75	2.03356	3.85814e-13	sp|Q84WK0|BH085_ARATH Transcription factor bHLH85 OS=Arabidopsis thaliana OX=3702 GN=BHLH85 PE=2 SV=1	AT2G42280	basic helix-loop-helix (bHLH) DNA-binding superfamily protein	bHLH	Upregulated
Potra2n1c685	57.991	1.81944	0.0305525	sp|Q9LSE2|ICE1_ARATH Transcription factor ICE1 OS=Arabidopsis thaliana OX=3702 GN=SCRM PE=1 SV=1	AT4G00870	basic helix-loop-helix (bHLH) DNA-binding superfamily protein	bHLH	Upregulated
Potra2n19c33458	103.406	1.69934	3.14209e-08	sp|Q9STJ6|BH126_ARATH Transcription factor bHLH126 OS=Arabidopsis thaliana OX=3702 GN=BHLH126 PE=2 SV=1	AT4G20970	basic helix-loop-helix (bHLH) DNA-binding superfamily protein	bHLH	Upregulated
Potra2n11c23325	101.658	2.24304	0.0054273	sp|Q9FLI1|BH036_ARATH Transcription factor bHLH36 OS=Arabidopsis thaliana OX=3702 GN=BHLH36 PE=2 SV=1	AT4G20970	basic helix-loop-helix (bHLH) DNA-binding superfamily protein	bHLH	Upregulated
Potra2n19c33457	107.64	3.36201	2.30622e-25	sp|Q9STJ7|BH118_ARATH Transcription factor bHLH118 OS=Arabidopsis thaliana OX=3702 GN=BHLH118 PE=2 SV=1	AT4G20970	basic helix-loop-helix (bHLH) DNA-binding superfamily protein	bHLH	Upregulated
Potra2n18c32068	102.023	1.82063	0.000682529	sp|A0A3Q7HES4|MTB2_SOLLC Transcription factor MTB2 OS=Solanum lycopersicum OX=4081 GN=MTB2 PE=2 SV=1	AT5G57150	basic helix-loop-helix (bHLH) DNA-binding superfamily protein	bHLH	Upregulated
Potra2n10c20389	535.753	-2.1562	0.0221969	sp|Q59MN0|VAC8_CANAL Vacuolar protein 8 OS=Candida albicans (strain SC5314 / ATCC MYA-2876) OX=237561 GN=VAC8 PE=3 SV=3	AT3G54870	Armadillo/beta-catenin repeat family protein / kinesin motor family protein	bZIP	Downregulated
Potra2n7c15464	70.6104	1.11152	0.00885686	sp|Q4KLY4|RING2_RAT E3 ubiquitin-protein ligase RING2 OS=Rattus norvegicus OX=10116 GN=Rnf2 PE=2 SV=1	AT1G03770	RING 1B|ATRING1B,RING1B	C2H2	Upregulated
Potra2n19c34115	779.878	-1.84252	0.0132416	sp|Q5DTZ6|RN150_MOUSE RING finger protein 150 OS=Mus musculus OX=10090 GN=Rnf150 PE=2 SV=2	AT1G55530	RING/U-box superfamily protein	C2H2	Downregulated
Potra2n1c1835	6.3084	3.53252	0.035728	sp|Q9QYK7|RNF11_MOUSE RING finger protein 11 OS=Mus musculus OX=10090 GN=Rnf11 PE=1 SV=1	AT3G05200	RING/U-box superfamily protein|ATL6	C2H2	Upregulated
Potra2n9c19332	24.386	2.12523	0.0254065	sp|Q42410|ZAT12_ARATH Zinc finger protein ZAT12 OS=Arabidopsis thaliana OX=3702 GN=ZAT12 PE=2 SV=1	AT3G19580	zinc-finger protein 2|AZF2,ZF2	C2H2	Upregulated
Potra2n14c27117	19.745	-5.35212	0.00312238	sp|Q8LPN7|RNG1L_ARATH E3 ubiquitin-protein ligase RING1-like OS=Arabidopsis thaliana OX=3702 GN=At3g19950 PE=1 SV=1	AT3G61730	reduced male fertility|RMF	C2H2	Downregulated
Potra2n9c20067	86.1723	1.47961	0.000356155	sp|Q8LPQ5|BTS_ARATH Zinc finger protein BRUTUS OS=Arabidopsis thaliana OX=3702 GN=BTS PE=1 SV=1	AT5G22920	CHY-type/CTCHY-type/RING-type Zinc finger protein	C2H2	Upregulated
Potra2n9c19656	132.328	-1.66286	0.0244548	sp|Q94JI5|C3H10_ORYSJ Zinc finger CCCH domain-containing protein 10 OS=Oryza sativa subsp. japonica OX=39947 GN=Os01g0738400 PE=2 SV=1	AT5G12850	CCCH-type zinc finger protein with ARM repeat domain-containing protein	C3H	Downregulated
Potra2n1c1486	57.6904	1.7541	3.69078e-07	sp|O80933|SCL9_ARATH Scarecrow-like protein 9 OS=Arabidopsis thaliana OX=3702 GN=SCL9 PE=2 SV=1	AT3G13840	GRAS family transcription factor	GRAS	Upregulated
Potra2n1c3211	39.8157	1.01795	0.0368884	sp|O14348|NC2B_SCHPO Negative cofactor 2 complex subunit beta OS=Schizosaccharomyces pombe (strain 972 / ATCC 24843) OX=284812 GN=ncb2 PE=3 SV=1	AT5G47640	nuclear factor Y, subunit B2|NF-YB2	Hap3/NF-YB	Upregulated
Potra2n1c2551	1708.22	-1.06594	0.0225237	sp|D3ZQL6|MILK1_RAT MICAL-like protein 1 OS=Rattus norvegicus OX=10116 GN=Micall1 PE=1 SV=1	AT1G10200	GATA type zinc finger transcription factor family protein	LIM	Downregulated
Potra2n16c30327	17.1689	1.45241	0.0483924	sp|Q9LZS0|PTL_ARATH Trihelix transcription factor PTL OS=Arabidopsis thaliana OX=3702 GN=PTL PE=1 SV=1	AT2G38250	Homeodomain-like superfamily protein	MYB	Upregulated
Potra2n4c8489	8.92936	-1.65147	0.0391211	sp|Q7Y0W5|EHD1_ORYSJ Two-component response regulator ORR30 OS=Oryza sativa subsp. japonica OX=39947 GN=EHD1 PE=1 SV=1	AT2G38300	myb-like HTH transcriptional regulator family protein	MYB-HB-like	Downregulated
Potra2n16c29670	26.7952	2.17706	0.00776759	sp|Q67W50|ORR25_ORYSJ Two-component response regulator ORR25 OS=Oryza sativa subsp. japonica OX=39947 GN=RR25 PE=3 SV=1	AT5G06800	myb-like HTH transcriptional regulator family protein	MYB-HB-like	Upregulated
Potra2n4c8731	14.7057	-1.65478	0.027155	sp|Q6NQK2|NAC8_ARATH SUPPRESSOR OF GAMMA RESPONSE 1 OS=Arabidopsis thaliana OX=3702 GN=SOG1 PE=1 SV=1	AT1G61110	NAC domain containing protein 25|anac025,NAC025	NAM	Downregulated
Potra2n8c17414	47.3328	1.02829	0.0397882	sp|P10610|CP2G1_RAT Cytochrome P450 2G1 OS=Rattus norvegicus OX=10116 GN=Cyp2g1 PE=2 SV=1	AT1G69500	cytochrome P450, family 704, subfamily B, polypeptide 1|CYP704B1	NAM	Upregulated
Potra2n2c6109	509.795	2.06627	0.00300868	sp|Q5PP28|NAC3_ARATH NAC domain-containing protein 3 OS=Arabidopsis thaliana OX=3702 GN=NAC003 PE=2 SV=1	AT4G28530	NAC domain containing protein 74|anac074,NAC074	NAM	Upregulated
Potra2n3c7593	17.7565	-5.92067	0.0182616	sp|A9XMT5|CCLOP_ORYSJ Protein CYCLOPS OS=Oryza sativa subsp. japonica OX=39947 GN=IPD3 PE=2 SV=1				Downregulated
Potra2n8c17636	879.624	-5.07208	0.0101265					Downregulated
Potra2n699s36524	4.69489	-4.84762	0.00869037					Downregulated
Potra2n9c19066	73.7951	-4.53066	0.00873839					Downregulated
Potra2n3c7785	1084.73	-2.6682	0.0210928					Downregulated
Potra2n7c15924	41.3516	-2.58488	0.0343585					Downregulated
Potra2n6c14432	8.77359	-1.72918	0.043109					Downregulated
Potra2n10c21764	233.932	-1.70243	0.00486875					Downregulated
Potra2n81s34501	22.0436	-1.69106	0.0445068	sp|D1FP53|LIN_MEDTR Putative E3 ubiquitin-protein ligase LIN OS=Medicago truncatula OX=3880 GN=LIN PE=2 SV=1				Downregulated
Potra2n14c27463	15.5378	-1.63883	0.036166					Downregulated
Potra2n12c24399	44.664	-1.21087	0.0357495					Downregulated
Potra2n6c13814	23.1424	-1.13269	0.0125076					Downregulated
Potra2n1c3374	126.017	1.03524	0.0175726					Upregulated
Potra2n15c29121	172.695	1.08102	9.22979e-05					Upregulated
Potra2n13c26232	2570.23	1.12407	0.0104122					Upregulated
Potra2n1c721	1162.43	1.25448	0.0466006					Upregulated
Potra2n3c7124	680.555	1.30158	0.00646609					Upregulated
Potra2n1c3965	268.846	1.41908	0.0269436					Upregulated
Potra2n5c12509	64.9795	1.45239	0.0293342					Upregulated
Potra2n2c4681	26.2817	1.71472	0.0102329					Upregulated
Potra2n2c4050	28.7963	1.71792	0.000434748					Upregulated
Potra2n8c17168	121.846	1.83403	0.0236406					Upregulated
Potra2n6c14534	47.9588	2.24116	0.00544711					Upregulated
Potra2n16c29601	12.9941	2.55465	0.0110427					Upregulated
Potra2n17c30810	6.7484	2.70766	0.0208283					Upregulated
Potra2n1c1684	6.33754	3.11953	0.0315112					Upregulated
Potra2n14c27119	6.02401	-2.32195	0.0285746	sp|O88448|KLC2_MOUSE Kinesin light chain 2 OS=Mus musculus OX=10090 GN=Klc2 PE=1 SV=1	AT1G01320	Tetratricopeptide repeat (TPR)-like superfamily protein		Downregulated
Potra2n17c30644	5.42303	2.71119	0.0478116	sp|Q6L440|R1A3_SOLDE Putative late blight resistance protein homolog R1A-3 OS=Solanum demissum OX=50514 GN=R1A-3 PE=5 SV=2	AT1G01490	Heavy metal transport/detoxification superfamily protein		Upregulated
Potra2n3c7161	3.80088	-4.12019	0.0272871	sp|P23665|GUNA_FIBSU Endoglucanase A OS=Fibrobacter succinogenes OX=833 GN=endA PE=1 SV=1	AT1G02800	cellulase 2|ATCEL2,CEL2		Downregulated
Potra2n5c10936	30.1144	2.34543	0.00791047	sp|Q8K097|LFG2_MOUSE Protein lifeguard 2 OS=Mus musculus OX=10090 GN=Faim2 PE=2 SV=1	AT1G03070	Bax inhibitor-1 family protein		Upregulated
Potra2n13c25129	395.335	1.13374	0.000343575	sp|Q337A0|XB33_ORYSJ Probable E3 ubiquitin-protein ligase XBOS33 OS=Oryza sativa subsp. japonica OX=39947 GN=XBOS33 PE=2 SV=1	AT1G03670	ankyrin repeat family protein		Upregulated
Potra2n13c25134	57.9772	1.27293	0.0423896	sp|Q9Z2X2|PSD10_MOUSE 26S proteasome non-ATPase regulatory subunit 10 OS=Mus musculus OX=10090 GN=Psmd10 PE=1 SV=3	AT1G03670	ankyrin repeat family protein		Upregulated
Potra2n5c10819	362.211	-1.1863	0.00400765	sp|Q02977|YRK_CHICK Proto-oncogene tyrosine-protein kinase Yrk OS=Gallus gallus OX=9031 GN=YRK PE=2 SV=2	AT1G03920	Protein kinase family protein		Downregulated
Potra2n747s36676	34.6762	1.8133	0.0107775	sp|K0E3U5|ECDK_ASPRU 2-oxoglutarate-dependent dioxygenase ecdK OS=Aspergillus rugulosus OX=41736 GN=ecdK PE=1 SV=1	AT1G05010	ethylene-forming enzyme|ACO4,EAT1,EFE		Upregulated
Potra2n17c31708	1120.95	2.01548	0.0362253	sp|Q7XZP5|APX5_ARATH L-ascorbate peroxidase 5, peroxisomal OS=Arabidopsis thaliana OX=3702 GN=APX5 PE=1 SV=2	AT1G05260	Peroxidase superfamily protein|RCI3,RCI3A		Upregulated
Potra2n2c4406	271.575	1.07134	3.14881e-05	sp|P0CG38|POTEI_HUMAN POTE ankyrin domain family member I OS=Homo sapiens OX=9606 GN=POTEI PE=3 SV=1	AT1G07710	Ankyrin repeat family protein		Upregulated
Potra2n8c16846	20.5246	1.42276	0.0463482	sp|Q9FF99|AAP7_ARATH Probable amino acid permease 7 OS=Arabidopsis thaliana OX=3702 GN=AAP7 PE=2 SV=1	AT1G08230	Transmembrane amino acid transporter family protein		Upregulated
Potra2n19c33920	823.702	1.1167	0.0464382	sp|P27825|CALX_YEAST Calnexin homolog OS=Saccharomyces cerevisiae (strain ATCC 204508 / S288c) OX=559292 GN=CNE1 PE=1 SV=1	AT1G08450	calreticulin 3|AtCRT3,CRT3,EBS2,PSL1		Upregulated
Potra2n5c12551	1964.75	1.10149	0.00339251	sp|A6ZQJ2|GLG2_YEAS7 Glycogenin-2 OS=Saccharomyces cerevisiae (strain YJM789) OX=307796 GN=GLG2 PE=3 SV=1	AT1G08990	plant glycogenin-like starch initiation protein 5|PGSIP5		Upregulated
Potra2n3c8346	26.3614	1.30496	0.0329962	sp|C5A7E9|TRUA_THEGJ tRNA pseudouridine synthase A OS=Thermococcus gammatolerans (strain DSM 15229 / JCM 11827 / EJ3) OX=593117 GN=truA PE=3 SV=1	AT1G09800	Pseudouridine synthase family protein		Upregulated
Potra2n10c22118	22.6174	1.36004	0.025402	sp|Q9VHD3|MAAI1_DROME Probable maleylacetoacetate isomerase 1 OS=Drosophila melanogaster OX=7227 GN=GstZ1 PE=1 SV=1	AT1G10370	Glutathione S-transferase family protein|ATGSTU17,ERD9,GST30,GST30B		Upregulated
Potra2n4c8729	5.82577	2.91063	0.0357495	sp|Q41005|CBPX_PEA Serine carboxypeptidase-like (Fragment) OS=Pisum sativum OX=3888 PE=2 SV=1	AT1G11080	serine carboxypeptidase-like 31|scpl31		Upregulated
Potra2n1c940	339.891	1.2528	1.0258e-05	sp|Q6BMV3|HUT1_DEBHA UDP-galactose transporter homolog 1 OS=Debaryomyces hansenii (strain ATCC 36239 / CBS 767 / JCM 1990 / NBRC 0083 / IGC 2968) OX=284592 GN=HUT1 PE=3 SV=2	AT1G12600	UDP-N-acetylglucosamine (UAA) transporter family		Upregulated
Potra2n9c19482	560.245	1.31942	0.0128767	sp|P10611|CP4A4_RABIT Cytochrome P450 4A4 OS=Oryctolagus cuniculus OX=9986 GN=CYP4A4 PE=1 SV=3	AT1G12740	cytochrome P450, family 87, subfamily A, polypeptide 2|CYP87A2		Upregulated
Potra2n15c28480	82.5364	2.90431	0.00875971	sp|P42432|NASA_BACSU Nitrate transporter OS=Bacillus subtilis (strain 168) OX=224308 GN=nasA PE=2 SV=2	AT1G12940	nitrate transporter2.5|ATNRT2.5,NRT2.5		Upregulated
Potra2n4c9506	61.2658	-4.23484	0.0239213	sp|D4AUX6|A8043_ARTBC Uncharacterized secreted protein ARB_08043 OS=Arthroderma benhamiae (strain ATCC MYA-4681 / CBS 112371) OX=663331 GN=ARB_08043 PE=1 SV=1	AT1G13680	PLC-like phosphodiesterases superfamily protein		Downregulated
Potra2n680s36424	1346.56	-1.75181	0.0488919	sp|P0DI39|CASP2_VIGUN Casparian strip membrane protein 2 OS=Vigna unguiculata OX=3917 PE=2 SV=1	AT1G17200	Uncharacterized protein family (UPF0497)		Downregulated
Potra2n1c1476	284.532	1.10385	0.0434917	sp|T0JRM4|MNLOX_COLGC Manganese lipoxygenase OS=Colletotrichum gloeosporioides (strain Cg-14) OX=1237896 GN=CGLO_15145 PE=1 SV=1	AT1G17420	lipoxygenase 3|LOX3		Upregulated
Potra2n3c8098	454.488	1.2068	0.0107363	sp|Q8LD98|NHL6_ARATH NDR1/HIN1-like protein 6 OS=Arabidopsis thaliana OX=3702 GN=NHL6 PE=1 SV=1	AT1G17620	Late embryogenesis abundant (LEA) hydroxyproline-rich glycoprotein family		Upregulated
Potra2n3c8123	596.652	2.11131	0.0350959	sp|Q8TCD6|PHOP2_HUMAN Pyridoxal phosphate phosphatase PHOSPHO2 OS=Homo sapiens OX=9606 GN=PHOSPHO2 PE=1 SV=1	AT1G17710	Pyridoxal phosphate phosphatase-related protein		Upregulated
Potra2n17c30578	32.978	2.05598	0.00331319		AT1G17830	hypothetical protein (DUF789)		Upregulated
Potra2n420s35610	22.7773	-1.12246	0.00822553	sp|Q38849|KAT2_ARATH Potassium channel KAT2 OS=Arabidopsis thaliana OX=3702 GN=KAT2 PE=1 SV=3	AT1G19780	cyclic nucleotide gated channel 8|ATCNGC8,CNGC8		Downregulated
Potra2n2c5754	29.8422	1.45926	0.028399	sp|Q95KW8|SWET1_PAPAN Sugar transporter SWEET1 OS=Papio anubis OX=9555 GN=SLC50A1 PE=2 SV=1	AT1G21460	Nodulin MtN3 family protein		Upregulated
Potra2n5c11357	182.827	1.33686	4.86607e-08	sp|F4KI56|SERCL_ARATH Metal-independent phosphoserine phosphatase OS=Arabidopsis thaliana OX=3702 GN=IPSP PE=1 SV=1	AT1G22170	Phosphoglycerate mutase family protein		Upregulated
Potra2n2c5519	9.10044	4.17288	0.00366234	sp|Q3SY77|UD3A2_HUMAN UDP-glucuronosyltransferase 3A2 OS=Homo sapiens OX=9606 GN=UGT3A2 PE=2 SV=1	AT1G22360	UDP-glucosyl transferase 85A2|AtUGT85A2,UGT85A2		Upregulated
Potra2n10c21465	391.421	1.85927	1.00654e-05		AT1G23110	fold protein		Upregulated
Potra2n15c28127	315.268	2.41244	0.0248207	sp|Q05156|GUN1_STRRE Cellulase 1 OS=Streptomyces reticuli OX=1926 GN=cel1 PE=1 SV=1	AT1G23210	glycosyl hydrolase 9B6|AtGH9B6,GH9B6		Upregulated
Potra2n81s34499	32.4542	1.44245	0.0381796		AT1G25275	thionin-like protein		Upregulated
Potra2n8c17746	103.357	1.18451	0.000635593		AT1G25400	transmembrane protein		Upregulated
Potra2n1c478	192.369	1.31976	0.0127591		AT1G27290	transmembrane protein		Upregulated
Potra2n1c463	234.181	-2.76612	0.0151622	sp|Q9SNE5|IRX15_ARATH Protein IRREGULAR XYLEM 15 OS=Arabidopsis thaliana OX=3702 GN=IRX15 PE=2 SV=1	AT1G27930	glucuronoxylan 4-O-methyltransferase-like protein (DUF579)		Downregulated
Potra2n1c3485	1613.18	-1.10344	0.0416379	sp|Q9FNP0|VQ31_ARATH VQ motif-containing protein 31 OS=Arabidopsis thaliana OX=3702 GN=VQ31 PE=1 SV=1	AT1G28280	VQ motif-containing protein		Downregulated
Potra2n11c23300	13.9023	2.33224	0.00489784	sp|Q9C7N2|CAD1_ARATH MACPF domain-containing protein CAD1 OS=Arabidopsis thaliana OX=3702 GN=CAD1 PE=2 SV=1	AT1G28380	MAC/Perforin domain-containing protein|NSL1		Upregulated
Potra2n11c23195	14.1255	-1.75247	0.0445068		AT1G29270	transcription factor bHLH35-like protein		Downregulated
Potra2n11c23103	88.3855	-1.21104	0.000780799		AT1G29790	S-adenosyl-L-methionine-dependent methyltransferases superfamily protein		Downregulated
Potra2n1c3762	185.697	-1.61226	0.00533183	sp|Q8BG28|B3GL2_MOUSE UDP-GalNAc:beta-1,3-N-acetylgalactosaminyltransferase 2 OS=Mus musculus OX=10090 GN=B3galnt2 PE=1 SV=1	AT1G32930	Galactosyltransferase family protein		Downregulated
Potra2n1c922	278.699	-6.52024	0.00868142	sp|P51542|CP7A1_RABIT Cytochrome P450 7A1 OS=Oryctolagus cuniculus OX=9986 GN=CYP7A1 PE=1 SV=1	AT1G33720	cytochrome P450, family 76, subfamily C, polypeptide 6		Downregulated
Potra2n2c5606	49.0352	3.34114	0.00190339	sp|Q9LXD1|RLF_ARATH Cytochrome b5 domain-containing protein RLF OS=Arabidopsis thaliana OX=3702 GN=RLF PE=2 SV=1	AT1G37130	nitrate reductase 2|ATNR2,B29,CHL3,NIA2,NIA2-1,NR,NR2		Upregulated
Potra2n5c11746	6.71043	3.48055	0.0470682	sp|O83746|FTSH_TREPA ATP-dependent zinc metalloprotease FtsH OS=Treponema pallidum (strain Nichols) OX=243276 GN=ftsH PE=3 SV=1	AT1G43910	P-loop containing nucleoside triphosphate hydrolases superfamily protein		Upregulated
Potra2n2c5671	1366.47	1.03645	0.0266363	sp|P44765|ABGA_HAEIN p-aminobenzoyl-glutamate hydrolase subunit A homolog OS=Haemophilus influenzae (strain ATCC 51907 / DSM 11121 / KW20 / Rd) OX=71421 GN=abgA PE=3 SV=1	AT1G44350	IAA-amino acid hydrolase ILR1-like 6|ILL6		Upregulated
Potra2n4c9690	769.456	1.83962	0.00461362	sp|Q93XX5|Y5713_ARATH PI-PLC X domain-containing protein At5g67130 OS=Arabidopsis thaliana OX=3702 GN=At5g67130 PE=1 SV=1	AT1G49740	PLC-like phosphodiesterases superfamily protein		Upregulated
Potra2n9c19357	1075.76	-1.51777	0.0226884	sp|P41006|PYRP_BACCL Uracil permease OS=Bacillus caldolyticus OX=1394 GN=pyrP PE=3 SV=1	AT1G49960	Xanthine/uracil permease family protein		Downregulated
Potra2n9c19654	218.169	1.78029	3.48595e-08	sp|Q58119|Y709_METJA Uncharacterized transporter MJ0709 OS=Methanocaldococcus jannaschii (strain ATCC 43067 / DSM 2661 / JAL-1 / JCM 10045 / NBRC 100440) OX=243232 GN=MJ0709 PE=3 SV=1	AT1G51340	MATE efflux family protein		Upregulated
Potra2n1c1591	182.716	1.63989	0.0256982		AT1G52330	Late embryogenesis abundant (LEA) hydroxyproline-rich glycoprotein family		Upregulated
Potra2n6c15267	64.6513	1.84114	0.00215657	sp|Q55A09|Y9963_DICDI Probable serine/threonine-protein kinase DDB_G0272254 OS=Dictyostelium discoideum OX=44689 GN=DDB_G0272254 PE=3 SV=1	AT1G53430	Leucine-rich repeat transmembrane protein kinase		Upregulated
Potra2n384s35498	18.8547	1.35257	0.0358226	sp|Q8LD26|DRMH3_ARATH Dormancy-associated protein homolog 3 OS=Arabidopsis thaliana OX=3702 GN=At1g56220 PE=1 SV=1	AT1G54070	Dormancy/auxin associated family protein		Upregulated
Potra2n5c12559	89.5911	1.14546	0.0101542	sp|Q4WA38|MNLOX_ASPFU Manganese lipoxygenase OS=Neosartorya fumigata (strain ATCC MYA-4609 / Af293 / CBS 101355 / FGSC A1100) OX=330879 GN=AFUA_4G02770 PE=1 SV=1	AT1G55020	lipoxygenase 1|ATLOX1,LOX1		Upregulated
Potra2n3c6530	385.428	1.76984	0.000502034	sp|Q60774|TM45A_MOUSE Transmembrane protein 45A OS=Mus musculus OX=10090 GN=Tmem45a PE=2 SV=1	AT1G55230	proteinase inhibitor I4, serpin (DUF716)		Upregulated
Potra2n1c94	6.5162	2.5179	0.0445532		AT1G55230	proteinase inhibitor I4, serpin (DUF716)		Upregulated
Potra2n1408s37052	14.543	1.37285	0.0454876	sp|F4K4T3|RLP56_ARATH Receptor-like protein 56 OS=Arabidopsis thaliana OX=3702 GN=RLP56 PE=2 SV=2	AT1G58190	receptor like protein 9|AtRLP9,RLP9		Upregulated
Potra2n8c18414	333.819	1.04749	5.53332e-05	sp|A7EWH6|MRH4_SCLS1 ATP-dependent RNA helicase mrh4, mitochondrial OS=Sclerotinia sclerotiorum (strain ATCC 18683 / 1980 / Ss-1) OX=665079 GN=mrh4 PE=3 SV=1	AT1G59990	DEA(D/H)-box RNA helicase family protein		Upregulated
Potra2n11c23397	52.147	-1.62932	0.0460956	sp|Q5VQ09|KINUB_ORYSJ Kinesin-like protein KIN-UB OS=Oryza sativa subsp. japonica OX=39947 GN=KINUB PE=2 SV=1	AT1G61350	ARM repeat superfamily protein		Downregulated
Potra2n4c8639	76.2539	1.47585	0.015691	sp|Q39202|RLK1_ARATH G-type lectin S-receptor-like serine/threonine-protein kinase RLK1 OS=Arabidopsis thaliana OX=3702 GN=RLK1 PE=2 SV=2	AT1G61610	S-locus lectin protein kinase family protein		Upregulated
Potra2n11c23466	122.857	1.67335	8.45532e-06	sp|Q70CT4|RLP8_ARATH Receptor-like protein 8 OS=Arabidopsis thaliana OX=3702 GN=RLP8 PE=2 SV=1	AT1G61740	Sulfite exporter TauE/SafE family protein		Upregulated
Potra2n3c7504	93.5964	1.51679	0.0121622	sp|P24337|HPSE_SOYBN Hydrophobic seed protein OS=Glycine max OX=3847 PE=1 SV=1	AT1G62510	Bifunctional inhibitor/lipid-transfer protein/seed storage 2S albumin superfamily protein		Upregulated
Potra2n1c827	1005.15	2.07728	1.01878e-37	sp|Q5NVA2|TRXR1_PONAB Thioredoxin reductase 1, cytoplasmic OS=Pongo abelii OX=9601 GN=TXNRD1 PE=2 SV=3	AT1G63940	monodehydroascorbate reductase 6|MDAR6		Upregulated
Potra2n6c13626	12.0347	-6.38535	0.02317	sp|Q9SIA8|DIR10_ARATH Dirigent protein 10 OS=Arabidopsis thaliana OX=3702 GN=DIR10 PE=2 SV=1	AT1G65870	Disease resistance-responsive (dirigent-like protein) family protein		Downregulated
Potra2n10c21938	251.725	1.05888	9.33548e-05	sp|O32107|YUID_BACSU Uncharacterized membrane protein YuiD OS=Bacillus subtilis (strain 168) OX=224308 GN=yuiD PE=4 SV=1	AT1G67600	Acid phosphatase/vanadium-dependent haloperoxidase-related protein		Upregulated
Potra2n8c17748	13.0305	2.00043	0.0166334	sp|Q8L4N1|PHO34_ARATH Universal stress protein PHOS34 OS=Arabidopsis thaliana OX=3702 GN=PHOS34 PE=1 SV=1	AT1G68300	Adenine nucleotide alpha hydrolases-like superfamily protein		Upregulated
Potra2n8c17679	14.7409	-3.61935	0.0426679	sp|Q54XZ5|Y0138_DICDI Probable serine/threonine-protein kinase DDB_G0278509 OS=Dictyostelium discoideum OX=44689 GN=DDB_G0278509 PE=3 SV=1	AT1G68780	RNI-like superfamily protein		Downregulated
Potra2n10c22127	439.065	1.59916	0.0274025	sp|Q9P380|PTR2_SCHPO Probable peptide transporter ptr2 OS=Schizosaccharomyces pombe (strain 972 / ATCC 24843) OX=284812 GN=ptr2 PE=1 SV=1	AT1G69870	nitrate transporter 1.7|NRT1.7		Upregulated
Potra2n1c1022	189.446	1.39739	0.000356155		AT1G70250	receptor serine/threonine kinase		Upregulated
Potra2n10c21610	391.371	1.05142	0.00643679	sp|F4HZQ7|WTR5_ARATH WAT1-related protein At1g21890 OS=Arabidopsis thaliana OX=3702 GN=At1g21890 PE=2 SV=1	AT1G70260	nodulin MtN21 /EamA-like transporter family protein		Upregulated
Potra2n1490s37101	18.6938	6.91644	0.00803072		AT1G73240	nucleoporin protein Ndc1-Nup protein		Upregulated
Potra2n12c23981	35.2844	1.83623	0.010038	sp|P63047|ST4A1_RAT Sulfotransferase 4A1 OS=Rattus norvegicus OX=10116 GN=Sult4a1 PE=1 SV=1	AT1G74090	desulfo-glucosinolate sulfotransferase 18|ATSOT18,ATST5B,SOT18		Upregulated
Potra2n18c32725	157.266	-1.12527	0.0007683	sp|S0DL59|APF5_GIBF5 Fatty acid synthase apf5 OS=Gibberella fujikuroi (strain CBS 195.34 / IMI 58289 / NRRL A-6831) OX=1279085 GN=apf5 PE=1 SV=1	AT1G74960	fatty acid biosynthesis 1|ATKAS2,FAB1,KAS2		Downregulated
Potra2n2c6238	122.986	2.30533	0.00756112	sp|Q6GKX7|GASAC_ARATH Gibberellin-regulated protein 12 OS=Arabidopsis thaliana OX=3702 GN=GASA12 PE=3 SV=1	AT1G75750	GAST1 protein homolog 1|GASA1		Upregulated
Potra2n11c22574	90.1502	1.0708	0.0125552	sp|O28538|HMDH_ARCFU 3-hydroxy-3-methylglutaryl-coenzyme A reductase OS=Archaeoglobus fulgidus (strain ATCC 49558 / VC-16 / DSM 4304 / JCM 9628 / NBRC 100126) OX=224325 GN=hmgA PE=3 SV=1	AT1G76490	hydroxy methylglutaryl CoA reductase 1|HMG1,HMGR1		Upregulated
Potra2n1c3844	37.2785	1.43488	0.0151441	sp|Q9LZN2|PILS6_ARATH Protein PIN-LIKES 6 OS=Arabidopsis thaliana OX=3702 GN=PILS6 PE=2 SV=1	AT1G76520	Auxin efflux carrier family protein		Upregulated
Potra2n7c15783	115.022	1.40352	0.000798979		AT1G76980	patatin-like phospholipase domain protein		Upregulated
Potra2n2c5705	919.349	-3.942	0.000353114	sp|P32021|EFE_PSESH 2-oxoglutarate-dependent ethylene/succinate-forming enzyme OS=Pseudomonas savastanoi pv. phaseolicola OX=319 GN=efe PE=1 SV=1	AT1G77330	2-oxoglutarate (2OG) and Fe(II)-dependent oxygenase superfamily protein		Downregulated
Potra2n5c11223	17.2304	-3.80457	0.00238961	sp|K0E678|ECDG_ASPRU 2-oxoglutarate-dependent dioxygenase ecdG OS=Aspergillus rugulosus OX=41736 GN=ecdG PE=1 SV=1	AT1G77330	2-oxoglutarate (2OG) and Fe(II)-dependent oxygenase superfamily protein		Downregulated
Potra2n2c5687	64.078	-5.43461	0.00788838	sp|Q5BEQ0|BGALB_EMENI Probable beta-galactosidase B OS=Emericella nidulans (strain FGSC A4 / ATCC 38163 / CBS 112.46 / NRRL 194 / M139) OX=227321 GN=lacB PE=3 SV=2	AT1G77410	beta-galactosidase 16		Downregulated
Potra2n7c16624	36.3607	-1.2919	0.0153665	sp|Q796C3|SQHC_BACSU Sporulenol synthase OS=Bacillus subtilis (strain 168) OX=224308 GN=sqhC PE=1 SV=1	AT1G78955	camelliol C synthase 1		Downregulated
Potra2n1c353	335.998	1.12113	3.97571e-05	sp|P63036|DNJA1_RAT DnaJ homolog subfamily A member 1 OS=Rattus norvegicus OX=10116 GN=Dnaja1 PE=1 SV=1	AT1G80920	Chaperone DnaJ-domain superfamily protein|J8		Upregulated
Potra2n10c21184	53.2621	-1.0257	0.0427832		AT2G03720	Adenine nucleotide alpha hydrolases-like superfamily protein|MRH6		Downregulated
Potra2n15c28766	477.144	1.00646	4.34717e-06	sp|B1Y9H2|DTDA_PYRNV D-aminoacyl-tRNA deacylase OS=Pyrobaculum neutrophilum (strain DSM 2338 / JCM 9278 / V24Sta) OX=444157 GN=dtdA PE=3 SV=1	AT2G03800	D-aminoacyl-tRNA deacylase		Upregulated
Potra2n16c29649	215.846	-2.26175	0.00558543	sp|P0AET8|HDHA_ECOLI 7-alpha-hydroxysteroid dehydrogenase OS=Escherichia coli (strain K12) OX=83333 GN=hdhA PE=1 SV=1	AT2G05990	NAD(P)-binding Rossmann-fold superfamily protein|ENR1,MOD1		Downregulated
Potra2n4c9696	955.792	6.26249	1.67897e-07	sp|P21637|COBG_SINSX Precorrin-3B synthase OS=Sinorhizobium sp. OX=42445 GN=cobG PE=3 SV=2	AT2G15620	nitrite reductase 1|ATHNIR,NIR,NIR1		Upregulated
Potra2n9c19145	566.561	4.14458	2.20191e-53	sp|Q9FK13|PDV1_ARATH Plastid division protein PDV1 OS=Arabidopsis thaliana OX=3702 GN=PDV1 PE=1 SV=1	AT2G16070	plastid division2|PDV2		Upregulated
Potra2n9c19054	133.062	1.43545	1.39096e-05	sp|Q12546|PPA_ASPFI Acid phosphatase OS=Aspergillus ficuum OX=5058 GN=aphA PE=1 SV=1	AT2G16430	purple acid phosphatase 10|ATPAP10,PAP10		Upregulated
Potra2n4c10054	127.962	1.54194	0.000161917	sp|Q4L3C1|SLE1_STAHJ N-acetylmuramoyl-L-alanine amidase sle1 OS=Staphylococcus haemolyticus (strain JCSC1435) OX=279808 GN=sle1 PE=3 SV=1	AT2G17120	lysm domain GPI-anchored protein 2 precursor|LYM2		Upregulated
Potra2n4c9841	43.3004	-5.29977	0.00958402	sp|Q06705|CSR1_YEAST Phosphatidylinositol transfer protein CSR1 OS=Saccharomyces cerevisiae (strain ATCC 204508 / S288c) OX=559292 GN=CSR1 PE=1 SV=1	AT2G21540	SEC14-like 3|ATSFH3,SFH3		Downregulated
Potra2n9c19089	125.648	1.53988	0.00097734		AT2G21620	Adenine nucleotide alpha hydrolases-like superfamily protein|RD2		Upregulated
Potra2n5c11114	83.0443	-2.44308	0.00427157	sp|Q06A28|RIR1_MUHVS Ribonucleoside-diphosphate reductase large subunit-like protein OS=Murid herpesvirus 1 (strain Smith) OX=10367 GN=RIR1 PE=1 SV=1	AT2G21790	ribonucleotide reductase 1|ATRNR1,CLS8,R1,RNR1		Downregulated
Potra2n4c9590	26.7868	1.8493	0.0105237	sp|Q2V2V3|PLAT3_ARATH PLAT domain-containing protein 3 OS=Arabidopsis thaliana OX=3702 GN=PLAT3 PE=4 SV=1	AT2G22170	Lipase/lipooxygenase, PLAT/LH2 family protein		Upregulated
Potra2n14c26346	1379.38	-4.81629	0.00898731	sp|Q0C7K7|RGLB_ASPTN Probable rhamnogalacturonate lyase B OS=Aspergillus terreus (strain NIH 2624 / FGSC A1156) OX=341663 GN=rglB PE=3 SV=1	AT2G22620	Rhamnogalacturonate lyase family protein		Downregulated
Potra2n7c16327	57.2545	1.07988	0.0171079	sp|Q9T058|Y4119_ARATH G-type lectin S-receptor-like serine/threonine-protein kinase At4g11900 OS=Arabidopsis thaliana OX=3702 GN=At4g11900 PE=2 SV=1	AT2G23450	Protein kinase superfamily protein		Upregulated
Potra2n246s35110	361.974	1.01818	0.0239213	sp|C0LA90|PYRHY_SPHWJ Pyrethroid hydrolase OS=Sphingobium wenxiniae (strain DSM 21828 / JZ-1) OX=595605 GN=pytH PE=1 SV=1	AT2G23620	methyl esterase 1|ATMES1,MES1		Upregulated
Potra2n18c33172	173.894	1.07007	0.010213	sp|Q7XUW4|KOR2_ORYSJ Potassium channel KOR2 OS=Oryza sativa subsp. japonica OX=39947 GN=Os04g0445000 PE=2 SV=2	AT2G24610	cyclic nucleotide-gated channel 14|ATCNGC14,CNGC14		Upregulated
Potra2n6c13118	91.2178	1.03386	0.00756112	sp|A8MPX8|PP2D1_HUMAN Protein phosphatase 2C-like domain-containing protein 1 OS=Homo sapiens OX=9606 GN=PP2D1 PE=2 SV=2	AT2G25620	DNA-binding protein phosphatase 1		Upregulated
Potra2n6c13170	49.0107	2.72809	0.00010633	sp|O49567|TAUE6_ARATH Sulfite exporter TauE/SafE family protein 6 OS=Arabidopsis thaliana OX=3702 GN=At4g21260 PE=3 SV=2	AT2G25737	Sulfite exporter TauE/SafE family protein		Upregulated
Potra2n2c5232	9.46183	2.3804	0.0426679	sp|P0AGM7|URAA_ECOLI Uracil permease OS=Escherichia coli (strain K12) OX=83333 GN=uraA PE=1 SV=1	AT2G26510	Xanthine/uracil permease family protein		Upregulated
Potra2n18c32121	1603.08	1.39374	0.000385699	sp|Q28CY9|XPR1_XENTR Xenotropic and polytropic retrovirus receptor 1 homolog OS=Xenopus tropicalis OX=8364 GN=xpr1 PE=2 SV=1	AT2G26660	SPX domain-containing protein 2 (SPX2)|ATSPX2,SPX2		Upregulated
Potra2n6c14752	1205.85	1.45196	0.00112039	sp|Q28CY9|XPR1_XENTR Xenotropic and polytropic retrovirus receptor 1 homolog OS=Xenopus tropicalis OX=8364 GN=xpr1 PE=2 SV=1	AT2G26660	SPX domain-containing protein 2 (SPX2)|ATSPX2,SPX2		Upregulated
Potra2n4c8905	46.3201	1.06145	0.0103248	sp|Q6EUK7|PUB04_ORYSJ U-box domain-containing protein 4 OS=Oryza sativa subsp. japonica OX=39947 GN=PUB4 PE=2 SV=1	AT2G27430	ARM repeat superfamily protein		Upregulated
Potra2n9c18689	1175.93	1.93709	9.59916e-31	sp|P23101|XYLZ_PSEPU Toluate 1,2-dioxygenase electron transfer component OS=Pseudomonas putida OX=303 GN=xylZ PE=3 SV=1	AT2G27510	ferredoxin 3|ATFD3,FD3		Upregulated
Potra2n4c10189	353.001	2.80673	7.79223e-24	sp|P23101|XYLZ_PSEPU Toluate 1,2-dioxygenase electron transfer component OS=Pseudomonas putida OX=303 GN=xylZ PE=3 SV=1	AT2G27510	ferredoxin 3|ATFD3,FD3		Upregulated
Potra2n9c18813	401.915	1.63383	0.0246693		AT2G27830	hypothetical protein		Upregulated
Potra2n1c2120	47.5126	1.20088	0.00169342	sp|Q03326|OXIR_STRAT Probable oxidoreductase OS=Streptomyces antibioticus OX=1890 PE=3 SV=1	AT2G29260	NAD(P)-binding Rossmann-fold superfamily protein		Upregulated
Potra2n15c28419	57.7304	1.44344	0.027015	sp|Q559T8|Y0701_DICDI Probable serine/threonine-protein kinase DDB_G0272282 OS=Dictyostelium discoideum OX=44689 GN=DDB_G0272282 PE=3 SV=1	AT2G31880	Leucine-rich repeat protein kinase family protein|EVR,SOBIR1		Upregulated
Potra2n8c18018	758.436	1.0364	0.0410065	sp|Q09893|YAI5_SCHPO Uncharacterized protein C24B11.05 OS=Schizosaccharomyces pombe (strain 972 / ATCC 24843) OX=284812 GN=SPAC24B11.05 PE=3 SV=1	AT2G32150	Haloacid dehalogenase-like hydrolase (HAD) superfamily protein		Upregulated
Potra2n1c2761	6.65007	3.81703	0.0261428	sp|P93051|ERDL7_ARATH Sugar transporter ERD6-like 7 OS=Arabidopsis thaliana OX=3702 GN=At2g48020 PE=2 SV=2	AT2G32830	phosphate transporter 1;5|PHT1;5,PHT5		Upregulated
Potra2n19c34121	33.0741	-1.66536	0.00120732	sp|P44727|TYRPA_HAEIN Tyrosine-specific transport protein 1 OS=Haemophilus influenzae (strain ATCC 51907 / DSM 11121 / KW20 / Rd) OX=71421 GN=tyrP-A PE=3 SV=1	AT2G33260	Tryptophan/tyrosine permease		Downregulated
Potra2n16c29905	219.052	1.66264	0.0145929	sp|Q682H0|HA22F_ARATH HVA22-like protein f OS=Arabidopsis thaliana OX=3702 GN=HVA22F PE=2 SV=1	AT2G36020	HVA22-like protein J|HVA22J		Upregulated
Potra2n6c14433	33.064	1.88742	0.00502783	sp|Q19KH7|RHCG_GASAC Ammonium transporter Rh type C OS=Gasterosteus aculeatus OX=69293 GN=rhcg PE=2 SV=1	AT2G38290	ammonium transporter 2|AMT2,AMT2;1,ATAMT2		Upregulated
Potra2n16c30399	14.7539	1.58848	0.0411619	sp|Q9SN51|PYL13_ARATH Abscisic acid receptor PYL13 OS=Arabidopsis thaliana OX=3702 GN=PYL13 PE=2 SV=1	AT2G38310	PYR1-like 4|PYL4,RCAR10		Upregulated
Potra2n1c1268	833.213	1.58872	8.04784e-09	sp|Q71WU6|PPAX_LISMF Pyrophosphatase PpaX OS=Listeria monocytogenes serotype 4b (strain F2365) OX=265669 GN=ppaX PE=3 SV=1	AT2G38740	Haloacid dehalogenase-like hydrolase (HAD) superfamily protein		Upregulated
Potra2n5c12343	32.7332	1.40357	0.030873		AT2G38820	DNA-directed RNA polymerase subunit beta-beta protein, putative (DUF506)		Upregulated
Potra2n8c16931	389.116	1.29848	8.64652e-05	sp|Q9C6M2|LHTL6_ARATH Lysine histidine transporter-like 6 OS=Arabidopsis thaliana OX=3702 GN=At1g25530 PE=2 SV=1	AT2G39130	Transmembrane amino acid transporter family protein		Upregulated
Potra2n8c17154	12.642	2.34931	0.0180138	sp|A4WJI0|LYSZ_PYRAR Putative [LysW]-aminoadipate/[LysW]-glutamate kinase OS=Pyrobaculum arsenaticum (strain DSM 13514 / JCM 11321) OX=340102 GN=lysZ PE=3 SV=1	AT2G39800	delta1-pyrroline-5-carboxylate synthase 1|ATP5CS,P5CS1		Upregulated
Potra2n10c20733	62.6961	1.12238	0.0451212	sp|Q9LY61|HSPR1_ARATH Nematode resistance protein-like HSPRO1 OS=Arabidopsis thaliana OX=3702 GN=HSPRO1 PE=1 SV=1	AT2G40000	ortholog of sugar beet HS1 PRO-1 2|ATHSPRO2,HSPRO2		Upregulated
Potra2n16c29729	196.599	1.97066	0.0307478	sp|B8NGP8|RHGC_ASPFN Probable rhamnogalacturonase C OS=Aspergillus flavus (strain ATCC 200026 / FGSC A1120 / NRRL 3357 / JCM 12722 / SRRC 167) OX=332952 GN=rhgC PE=3 SV=2	AT2G41850	polygalacturonase ADPG2-like protein|ADPG2,PGAZAT		Upregulated
Potra2n15c28463	7.46985	1.95338	0.0484591	sp|O46406|AOCY_BOVIN Primary amine oxidase, lung isozyme OS=Bos taurus OX=9913 PE=2 SV=1	AT2G42490	Copper amine oxidase family protein		Upregulated
Potra2n15c28464	71.6024	2.1939	6.2482e-07	sp|Q9TTK6|AOC3_BOVIN Membrane primary amine oxidase OS=Bos taurus OX=9913 GN=AOC3 PE=2 SV=3	AT2G42490	Copper amine oxidase family protein		Upregulated
Potra2n1c2007	619.715	1.35496	0.00756112		AT2G44260	DUF946 family protein (DUF946)		Upregulated
Potra2n14c26806	846.646	2.06076	0.000419206	sp|Q02725|VTC3_YEAST Vacuolar transporter chaperone 3 OS=Saccharomyces cerevisiae (strain ATCC 204508 / S288c) OX=559292 GN=VTC3 PE=1 SV=1	AT2G45130	SPX domain protein 3|ATSPX3,SPX3		Upregulated
Potra2n14c26808	25.9069	2.14142	0.0127591	sp|Q7XEY9|SPX3_ORYSJ SPX domain-containing protein 3 OS=Oryza sativa subsp. japonica OX=39947 GN=SPX3 PE=1 SV=1	AT2G45130	SPX domain protein 3|ATSPX3,SPX3		Upregulated
Potra2n2c5120	25.302	2.84205	0.00647489	sp|Q02725|VTC3_YEAST Vacuolar transporter chaperone 3 OS=Saccharomyces cerevisiae (strain ATCC 204508 / S288c) OX=559292 GN=VTC3 PE=1 SV=1	AT2G45130	SPX domain protein 3|ATSPX3,SPX3		Upregulated
Potra2n14c27161	57.8419	1.8192	0.0344834		AT2G46630	serine/arginine repetitive matrix protein		Upregulated
Potra2n13c25019	5388.23	-3.9541	0.00444099	sp|A4XAH9|CLPX_SALTO ATP-dependent Clp protease ATP-binding subunit ClpX OS=Salinispora tropica (strain ATCC BAA-916 / DSM 44818 / CNB-440) OX=369723 GN=clpX PE=3 SV=1	AT3G01610	cell division cycle 48C		Downregulated
Potra2n17c31393	388.336	1.27298	0.00587093	sp|Q21407|GPCP1_CAEEL Putative glycerophosphocholine phosphodiesterase GPCPD1 homolog 1 OS=Caenorhabditis elegans OX=6239 GN=gpcp-1 PE=3 SV=2	AT3G02040	senescence-related gene 3|SRG3		Upregulated
Potra2n1c2826	2187.43	1.58895	0.013384	sp|Q21407|GPCP1_CAEEL Putative glycerophosphocholine phosphodiesterase GPCPD1 homolog 1 OS=Caenorhabditis elegans OX=6239 GN=gpcp-1 PE=3 SV=2	AT3G02040	senescence-related gene 3|SRG3		Upregulated
Potra2n4c9102	124.67	1.33796	5.84164e-05		AT3G03270	Adenine nucleotide alpha hydrolases-like superfamily protein		Upregulated
Potra2n13c25637	145.368	1.23972	6.74151e-05	sp|P06200|PHLC_PSEAE Hemolytic phospholipase C OS=Pseudomonas aeruginosa (strain ATCC 15692 / DSM 22644 / CIP 104116 / JCM 14847 / LMG 12228 / 1C / PRS 101 / PAO1) OX=208964 GN=plcH PE=3 SV=2	AT3G03530	non-specific phospholipase C4|NPC4		Upregulated
Potra2n13c25884	276.412	1.38098	0.000150291	sp|Q94AG2|SERK1_ARATH Somatic embryogenesis receptor kinase 1 OS=Arabidopsis thaliana OX=3702 GN=SERK1 PE=1 SV=2	AT3G04530	phosphoenolpyruvate carboxylase kinase 2|ATPPCK2,PEPCK2,PPCK2		Upregulated
Potra2n13c25981	34.1096	1.17462	0.0152832		AT3G04890	adenine phosphoribosyltransferase-like protein, putative (DUF2358)		Upregulated
Potra2n16c30557	14.4311	1.78437	0.0269564		AT3G05975	Late embryogenesis abundant (LEA) hydroxyproline-rich glycoprotein family		Upregulated
Potra2n5c12529	491.289	1.15158	0.0425562	sp|Q84J88|HIP36_ARATH Heavy metal-associated isoprenylated plant protein 36 OS=Arabidopsis thaliana OX=3702 GN=HIPP36 PE=2 SV=1	AT3G06130	Heavy metal transport/detoxification superfamily protein		Upregulated
Potra2n9c18854	5.76792	4.03592	0.0375773		AT3G07350	sulfate/thiosulfate import ATP-binding protein, putative (DUF506)		Upregulated
Potra2n6c15061	463.533	-2.27306	0.00615258	sp|Q7XMJ2|KN10B_ORYSJ Kinesin-like protein KIN-10B OS=Oryza sativa subsp. japonica OX=39947 GN=KIN10B PE=2 SV=2	AT3G10180	P-loop containing nucleoside triphosphate hydrolases superfamily protein		Downregulated
Potra2n8c16766	5.43451	-5.33572	0.00180325	sp|P0AAE0|CYCA_ECOLI D-serine/D-alanine/glycine transporter OS=Escherichia coli (strain K12) OX=83333 GN=cycA PE=1 SV=1	AT3G10600	cationic amino acid transporter 7		Downregulated
Potra2n1c2150	256.69	-4.31277	0.00475241	sp|Q8GUJ1|UXT2_ARATH UDP-xylose transporter 2 OS=Arabidopsis thaliana OX=3702 GN=UXT2 PE=1 SV=1	AT3G11320	Nucleotide-sugar transporter family protein		Downregulated
Potra2n8c17135	58.639	2.16272	0.0087397	sp|Q9SYJ2|GPAT3_ARATH Probable glycerol-3-phosphate acyltransferase 3 OS=Arabidopsis thaliana OX=3702 GN=GPAT3 PE=2 SV=1	AT3G11430	glycerol-3-phosphate acyltransferase 5|ATGPAT5,GPAT5		Upregulated
Potra2n3c6674	5.11586	3.30399	0.037907	sp|O06476|YFMR_BACSU Uncharacterized ABC transporter ATP-binding protein YfmR OS=Bacillus subtilis (strain 168) OX=224308 GN=yfmR PE=3 SV=1	AT3G13080	multidrug resistance-associated protein 3|ATMRP3,MRP3		Upregulated
Potra2n16c29697	14.9938	1.63351	0.00716617	sp|Q9FVX2|PP129_ARATH Pentatricopeptide repeat-containing protein At1g77360, mitochondrial OS=Arabidopsis thaliana OX=3702 GN=At1g77360 PE=2 SV=2	AT3G13770	Pentatricopeptide repeat (PPR) superfamily protein		Upregulated
Potra2n1c3132	13.4144	2.48534	0.0124206	sp|Q54JW5|SWET1_DICDI Sugar transporter SWEET1 OS=Dictyostelium discoideum OX=44689 GN=slc50a1 PE=2 SV=1	AT3G14770	Nodulin MtN3 family protein		Upregulated
Potra2n19c34342	20.7638	-1.66352	0.0110427	sp|Q13470|TNK1_HUMAN Non-receptor tyrosine-protein kinase TNK1 OS=Homo sapiens OX=9606 GN=TNK1 PE=1 SV=3	AT3G14840	Leucine-rich repeat transmembrane protein kinase		Downregulated
Potra2n8c18536	70.7289	1.08585	0.00659146	sp|O04023|SRC2_ARATH Protein SRC2 homolog OS=Arabidopsis thaliana OX=3702 GN=SRC2 PE=1 SV=1	AT3G16510	Calcium-dependent lipid-binding (CaLB domain) family protein		Upregulated
Potra2n3c7064	142.989	1.48666	1.0258e-05	sp|Q0D673|P2C62_ORYSJ Probable protein phosphatase 2C 62 OS=Oryza sativa subsp. japonica OX=39947 GN=Os07g0507000 PE=2 SV=1	AT3G16560	Protein phosphatase 2C family protein		Upregulated
Potra2n13c26189	575.444	1.3691	1.66801e-05	sp|B1JFN5|CLSA_PSEPW Cardiolipin synthase A OS=Pseudomonas putida (strain W619) OX=390235 GN=clsA PE=3 SV=1	AT3G16785	phospholipase D P1		Upregulated
Potra2n15c28935	1499.49	1.45499	0.00183319	sp|P09889|PPA5_PIG Tartrate-resistant acid phosphatase type 5 OS=Sus scrofa OX=9823 GN=ACP5 PE=1 SV=4	AT3G17790	purple acid phosphatase 17|ATACP5,ATPAP17,PAP17		Upregulated
Potra2n9c19172	71.2974	1.23559	0.00960047	sp|Q945B5|AOP2V_ARATH 2-oxoglutarate-dependent dioxygenase AOP2 OS=Arabidopsis thaliana OX=3702 GN=AOP2 PE=2 SV=1	AT3G19000	2-oxoglutarate (2OG) and Fe(II)-dependent oxygenase superfamily protein		Upregulated
Potra2n4c9742	86.4518	1.85894	0.000158835	sp|Q5MNH6|LOLO2_EPIUN 2-oxoglutarate-dependent dioxygenase lolO2 OS=Epichloe uncinata OX=5050 GN=lolO2 PE=1 SV=1	AT3G19000	2-oxoglutarate (2OG) and Fe(II)-dependent oxygenase superfamily protein		Upregulated
Potra2n8c18047	32.6809	-1.31235	0.0413228	sp|Q06697|CDC73_YEAST Cell division control protein 73 OS=Saccharomyces cerevisiae (strain ATCC 204508 / S288c) OX=559292 GN=CDC73 PE=1 SV=1	AT3G22590	PLANT HOMOLOGOUS TO PARAFIBROMIN|CDC73,PHP		Downregulated
Potra2n10c21724	37.1833	-2.81295	0.0061121	sp|Q8W4K5|VAB_ARATH VAN3-binding protein OS=Arabidopsis thaliana OX=3702 GN=VAB PE=1 SV=1	AT3G22810	auxin canalization protein (DUF828)		Downregulated
Potra2n8c18085	345.573	1.98299	0.00587093	sp|P27516|CBR_DUNSA Carotene biosynthesis-related protein CBR, chloroplastic OS=Dunaliella salina OX=3046 GN=CBR PE=1 SV=1	AT3G22840	Chlorophyll A-B binding family protein|ELIP,ELIP1		Upregulated
Potra2n8c18092	308.869	1.54267	2.2429e-07	sp|Q54506|SAT_RIFPS Sulfate adenylyltransferase OS=Riftia pachyptila sulfur-oxidizing endosymbiont OX=35843 GN=sat PE=1 SV=1	AT3G22890	ATP sulfurylase 1|APS1		Upregulated
Potra2n3c6894	88.3276	-1.7155	0.0199417	sp|Q7XJM2|CCD7_ARATH Carotenoid cleavage dioxygenase 7, chloroplastic OS=Arabidopsis thaliana OX=3702 GN=CCD7 PE=1 SV=1	AT3G24220	nine-cis-epoxycarotenoid dioxygenase 6|ATNCED6,NCED6		Downregulated
Potra2n6c13940	14.3256	-1.63892	0.0293443	sp|C7CM33|RUTD_METED Putative aminoacrylate hydrolase RutD OS=Methylorubrum extorquens (strain DSM 6343 / CIP 106787 / DM4) OX=661410 GN=rutD PE=3 SV=1	AT3G24420	alpha/beta-Hydrolases superfamily protein		Downregulated
Potra2n13c25212	32.0889	2.93682	0.0293342	sp|A0A1E1FFL4|PRHD_PENBI Cytochrome P450 monooxygenase prhD OS=Penicillium brasilianum OX=104259 GN=prhD PE=3 SV=1	AT3G25180	cytochrome P450, family 82, subfamily G, polypeptide 1|CYP82G1		Upregulated
Potra2n4c9412	113.946	3.37626	0.0420547	sp|A1DA60|FTMC_NEOFI Tryprostatin B 6-hydroxylase OS=Neosartorya fischeri (strain ATCC 1020 / DSM 3700 / CBS 544.65 / FGSC A1164 / JCM 1740 / NRRL 181 / WB 181) OX=331117 GN=ftmP450-1 PE=3 SV=1	AT3G25180	cytochrome P450, family 82, subfamily G, polypeptide 1|CYP82G1		Upregulated
Potra2n8c17703	17.3431	2.13574	0.0158598	sp|Q93ZC5|AOC4_ARATH Allene oxide cyclase 4, chloroplastic OS=Arabidopsis thaliana OX=3702 GN=AOC4 PE=2 SV=1	AT3G25780	allene oxide cyclase 3|AOC3		Upregulated
Potra2n19c34382	29.0811	2.27412	0.0132548	sp|Q0JF02|CPS4_ORYSJ Syn-copalyl diphosphate synthase OS=Oryza sativa subsp. japonica OX=39947 GN=CPS4 PE=2 SV=1	AT3G25810	Terpenoid cyclases/Protein prenyltransferases superfamily protein		Upregulated
Potra2n8c18351	163.681	2.00091	6.2482e-07	sp|Q8P4E6|NORM_XANCP Probable multidrug resistance protein NorM OS=Xanthomonas campestris pv. campestris (strain ATCC 33913 / DSM 3586 / NCPPB 528 / LMG 568 / P 25) OX=190485 GN=norM PE=3 SV=1	AT3G26590	MATE efflux family protein		Upregulated
Potra2n14c27570	24.2603	-1.03548	0.0457458	sp|P0CU00|YI78_SCHPO Uncharacterized oxidoreductase SPAC977.08 OS=Schizosaccharomyces pombe (strain 972 / ATCC 24843) OX=284812 GN=SPAC977.08 PE=3 SV=1	AT3G26760	NAD(P)-binding Rossmann-fold superfamily protein		Downregulated
Potra2n1c2895	153.912	3.65963	2.2429e-07	sp|A7N6K9|CLCA_VIBCB H(+)/Cl(-) exchange transporter ClcA OS=Vibrio campbellii (strain ATCC BAA-1116 / BB120) OX=338187 GN=clcA PE=3 SV=1	AT3G27170	chloride channel B|ATCLC-B,CLC-B		Upregulated
Potra2n17c31107	32.9614	1.09529	0.0154788	sp|Q9UPT5|EXOC7_HUMAN Exocyst complex component 7 OS=Homo sapiens OX=9606 GN=EXOC7 PE=1 SV=3	AT3G29400	exocyst subunit exo70 family protein E1|ATEXO70E1,EXO70E1		Upregulated
Potra2n9c18681	183.186	1.38704	0.000128979		AT3G44510	alpha/beta-Hydrolases superfamily protein		Upregulated
Potra2n1c1073	2870.46	1.32839	1.64337e-06	sp|P39398|LGOT_ECOLI Probable L-galactonate transporter OS=Escherichia coli (strain K12) OX=83333 GN=lgoT PE=1 SV=2	AT3G47420	putative glycerol-3-phosphate transporter 1		Upregulated
Potra2n4c9465	865.481	1.65693	3.66841e-23	sp|C0MFB5|LDH_STRS7 L-lactate dehydrogenase OS=Streptococcus equi subsp. zooepidemicus (strain H70) OX=553483 GN=ldh PE=3 SV=1	AT3G47520	malate dehydrogenase|MDH		Upregulated
Potra2n16c30512	87.839	3.53064	0.0216192	sp|A0A2Z5TMB8|HIMC_ASPJA Cytochrome P450 monooxygenase himC OS=Aspergillus japonicus OX=34381 GN=himC PE=3 SV=1	AT3G48310	cytochrome P450, family 71, subfamily A, polypeptide 22|CYP71A22		Upregulated
Potra2n7c16290	50.7542	-3.98447	0.0049076	sp|Q1NEI6|KDRDH_SPHSS 2-dehydro-3-deoxy-L-rhamnonate dehydrogenase (NAD(+)) OS=Sphingomonas sp. (strain SKA58) OX=314266 GN=LRA5 PE=1 SV=1	AT3G50560	NAD(P)-binding Rossmann-fold superfamily protein		Downregulated
Potra2n5c11618	24.7393	1.82785	0.0124312	sp|A7F8T1|MKAR_SCLS1 Very-long-chain 3-oxoacyl-CoA reductase OS=Sclerotinia sclerotiorum (strain ATCC 18683 / 1980 / Ss-1) OX=665079 GN=SS1G_14012 PE=3 SV=1	AT3G50560	NAD(P)-binding Rossmann-fold superfamily protein		Upregulated
Potra2n5c11696	109.73	1.04902	0.0156372	sp|P30612|CP52P_CANTR Cytochrome P450 52C1 OS=Candida tropicalis OX=5482 GN=CYP52C1 PE=2 SV=1	AT3G50660	Cytochrome P450 superfamily protein		Upregulated
Potra2n5c11771	722.693	-2.74587	0.0138351	sp|Q6K990|KN10A_ORYSJ Kinesin-like protein KIN-10A OS=Oryza sativa subsp. japonica OX=39947 GN=KIN10A PE=2 SV=1	AT3G51150	ATP binding microtubule motor family protein		Downregulated
Potra2n16c29840	12.238	2.08563	0.0405581		AT3G52360	transmembrane protein		Upregulated
Potra2n3c8154	34.8112	1.33744	0.0253037	sp|Q05205|PPB_LYSEN Alkaline phosphatase OS=Lysobacter enzymogenes OX=69 GN=phoA PE=1 SV=1	AT3G52820	purple acid phosphatase 22|ATPAP22,PAP22		Upregulated
Potra2n6c14312	195.255	1.17648	0.0289068	sp|O64851|IQM4_ARATH IQ domain-containing protein IQM4 OS=Arabidopsis thaliana OX=3702 GN=IQM4 PE=2 SV=1	AT3G52870	IQ calmodulin-binding motif family protein		Upregulated
Potra2n14c26485	406.907	-2.36142	0.00300868	sp|Q8L9J9|CAES_ARATH Probable carbohydrate esterase At4g34215 OS=Arabidopsis thaliana OX=3702 GN=At4g34215 PE=1 SV=2	AT3G53010	carbohydrate esterase, putative (DUF303)		Downregulated
Potra2n8c17513	56.4146	1.49287	0.0357175	sp|P0A9U2|YBHF_SHIFL Probable multidrug ABC transporter ATP-binding protein YbhF OS=Shigella flexneri OX=623 GN=ybhF PE=3 SV=1	AT3G53480	pleiotropic drug resistance 9|ABCG37,ATPDR9,PDR9,PIS1		Upregulated
Potra2n13c25215	100.532	1.32219	0.00824821	sp|Q9MA41|CTL1_ARATH Chitinase-like protein 1 OS=Arabidopsis thaliana OX=3702 GN=CTL1 PE=1 SV=1	AT3G54420	homolog of carrot EP3-3 chitinase|ATCHITIV,ATEP3,CHIV,EP3		Upregulated
Potra2n8c16964	119.637	1.5165	0.0014402	sp|Q41864|TRXM_MAIZE Thioredoxin M-type, chloroplastic OS=Zea mays OX=4577 GN=TRM1 PE=2 SV=1	AT3G54960	PDI-like 1-3|ATPDI1,ATPDIL1-3,PDI1,PDIL1-3		Upregulated
Potra2n10c20785	969.606	1.46321	6.17498e-07	sp|F4IY62|UGPA3_ARATH UTP--glucose-1-phosphate uridylyltransferase 3, chloroplastic OS=Arabidopsis thaliana OX=3702 GN=UGP3 PE=1 SV=1	AT3G56040	UDP-glucose pyrophosphorylase 3|UGP3		Upregulated
Potra2n6c15012	266.466	-1.08374	0.00366234	sp|Q5L0X8|MRAY_GEOKA Phospho-N-acetylmuramoyl-pentapeptide-transferase OS=Geobacillus kaustophilus (strain HTA426) OX=235909 GN=mraY PE=3 SV=1	AT3G57220	Glycosyl transferase family 4 protein		Downregulated
Potra2n6c14936	1862.07	1.151	0.00154634	sp|Q97U94|AGAL_SACS2 Alpha-galactosidase OS=Saccharolobus solfataricus (strain ATCC 35092 / DSM 1617 / JCM 11322 / P2) OX=273057 GN=galS PE=1 SV=2	AT3G57520	seed imbibition 2|AtSIP2,SIP2		Upregulated
Potra2n5c11037	261.378	2.06347	2.42384e-25		AT3G59090	tobamovirus multiplication protein		Upregulated
Potra2n14c27006	2683.25	3.35464	4.49594e-19	sp|Q2YY67|TDCB_STAAB L-threonine dehydratase catabolic TdcB OS=Staphylococcus aureus (strain bovine RF122 / ET3-1) OX=273036 GN=tdcB PE=3 SV=2	AT3G61440	cysteine synthase C1|ARATH;BSAS3;1,ATCYSC1,CYSC1		Upregulated
Potra2n14c27409	2586.38	1.03066	3.48595e-08	sp|Q3J7X9|HLDD_NITOC ADP-L-glycero-D-manno-heptose-6-epimerase OS=Nitrosococcus oceani (strain ATCC 19707 / BCRC 17464 / NCIMB 11848 / C-107) OX=323261 GN=hldD PE=3 SV=1	AT3G62830	NAD(P)-binding Rossmann-fold superfamily protein|ATUXS2,AUD1,UXS2		Upregulated
Potra2n2c6001	26.7066	2.63653	6.14197e-06	sp|Q8W4K5|VAB_ARATH VAN3-binding protein OS=Arabidopsis thaliana OX=3702 GN=VAB PE=1 SV=1	AT3G63300	FORKED 1|FKD1		Upregulated
Potra2n6c13197	40.7882	1.97026	0.0445068	sp|Q9BYV7|BCDO2_HUMAN Beta,beta-carotene 9',10'-oxygenase OS=Homo sapiens OX=9606 GN=BCO2 PE=1 SV=5	AT3G63520	carotenoid cleavage dioxygenase 1|ATCCD1,ATNCED1,CCD1,NCED1		Upregulated
Potra2n2c5022	344.652	-1.02617	0.000187206	sp|Q9SH71|Y1421_ARATH Putative inactive receptor-like protein kinase At1g64210 OS=Arabidopsis thaliana OX=3702 GN=At1g64210 PE=1 SV=1	AT4G00720	shaggy-like protein kinase 32|ASKTHETA,ATSK32,SK32		Downregulated
Potra2n14c27135	562.713	1.47562	2.30149e-08	sp|Q9M160|Y4095_ARATH Uncharacterized protein At4g00950 OS=Arabidopsis thaliana OX=3702 GN=At4g00950 PE=2 SV=1	AT4G00950	hypothetical protein (DUF688)|MEE47		Upregulated
Potra2n15c29208	46.9272	-1.57092	0.00742269		AT4G01575	serine protease inhibitor, Kazal-type family protein		Downregulated
Potra2n2c4565	55.0591	1.71469	0.00292843	sp|Q9M349|LEA37_ARATH Late embryogenesis abundant protein 37 OS=Arabidopsis thaliana OX=3702 GN=LEA37 PE=2 SV=1	AT4G02380	senescence-associated gene 21|AtLEA5,SAG21		Upregulated
Potra2n14c27393	146.808	2.23648	1.44652e-17	sp|Q9SRX6|LEA2_ARATH Late embryogenis abundant protein 2 OS=Arabidopsis thaliana OX=3702 GN=LEA2 PE=2 SV=1	AT4G02380	senescence-associated gene 21|AtLEA5,SAG21		Upregulated
Potra2n2c4551	99.3387	1.31423	1.51881e-09		AT4G02425	LYR motif protein		Upregulated
Potra2n5c10985	44.7968	-2.60089	0.00982651		AT4G02830	hypothetical protein		Downregulated
Potra2n2c5950	17.0782	2.20632	0.0210928		AT4G02830	hypothetical protein		Upregulated
Potra2n4c8518	442.37	1.2723	0.000225542	sp|Q00216|TIGA_ASPNG Protein disulfide-isomerase tigA OS=Aspergillus niger OX=5061 GN=tigA PE=2 SV=1	AT4G04610	APS reductase 1|APR,APR1,ATAPR1,PRH19		Upregulated
Potra2n1c3259	3765.65	1.43506	6.31255e-27	sp|Q6NRG5|NDOR1_XENLA NADPH-dependent diflavin oxidoreductase 1 OS=Xenopus laevis OX=8355 GN=ndor1 PE=2 SV=1	AT4G05390	root FNR 1|ATRFNR1,RFNR1		Upregulated
Potra2n9c19376	123.812	1.24358	0.0291306	sp|O80568|ITPK4_ARATH Inositol 1,3,4-trisphosphate 5/6-kinase 4 OS=Arabidopsis thaliana OX=3702 GN=ITPK4 PE=1 SV=2	AT4G08170	Inositol 1,3,4-trisphosphate 5/6-kinase family protein		Upregulated
Potra2n18c32115	51.9878	4.28191	0.0146021	sp|P28584|TRK2_YEAST Low-affinity potassium transport protein OS=Saccharomyces cerevisiae (strain ATCC 204508 / S288c) OX=559292 GN=TRK2 PE=1 SV=1	AT4G10310	high-affinity K+ transporter 1|ATHKT1,HKT1		Upregulated
Potra2n5c12694	327.439	2.21847	0.0129728	sp|B8NI22|IMQE_ASPFN 2-oxoglutarate-dependent dioxygenase imqE OS=Aspergillus flavus (strain ATCC 200026 / FGSC A1120 / NRRL 3357 / JCM 12722 / SRRC 167) OX=332952 GN=imqE PE=2 SV=1	AT4G10500	2-oxoglutarate (2OG) and Fe(II)-dependent oxygenase superfamily protein		Upregulated
Potra2n8c18105	58.832	1.17125	0.00475241	sp|C0LGU5|Y5457_ARATH Probable LRR receptor-like serine/threonine-protein kinase At5g45780 OS=Arabidopsis thaliana OX=3702 GN=At5g45780 PE=1 SV=1	AT4G14580	CBL-interacting protein kinase 4|CIPK4,SnRK3.3		Upregulated
Potra2n266s35156	50.0541	1.96519	0.0276926	sp|P21874|ODPB_GEOSE Pyruvate dehydrogenase E1 component subunit beta OS=Geobacillus stearothermophilus OX=1422 GN=pdhB PE=1 SV=2	AT4G15560	Deoxyxylulose-5-phosphate synthase|CLA,CLA1,DEF,DXPS2,DXS		Upregulated
Potra2n10c22278	375.519	-2.50444	0.0292338	sp|P32292|ARG2_VIGRR Indole-3-acetic acid-induced protein ARG2 OS=Vigna radiata var. radiata OX=3916 GN=ARG2 PE=2 SV=1	AT4G15910	drought-induced 21|ATDI21,DI21		Downregulated
Potra2n1c1360	2395.04	1.1778	0.00117762	sp|P81140|GCDH_PIG Glutaryl-CoA dehydrogenase, mitochondrial (Fragment) OS=Sus scrofa OX=9823 GN=GCDH PE=1 SV=1	AT4G16760	acyl-CoA oxidase 1|ACX1,ATACX1		Upregulated
Potra2n4c8834	268.568	1.75121	0.00930166	sp|Q3E912|DMP10_ARATH Protein DMP10 OS=Arabidopsis thaliana OX=3702 GN=DMP10 PE=2 SV=1	AT4G18425	transmembrane protein, putative (DUF679)		Upregulated
Potra2n3c7089	835.666	-2.91246	0.0107363	sp|O22807|GALS1_ARATH Galactan beta-1,4-galactosyltransferase GALS1 OS=Arabidopsis thaliana OX=3702 GN=GALS1 PE=2 SV=2	AT4G20170	glycosyltransferase family protein (DUF23)		Downregulated
Potra2n6c14333	58.8301	1.26782	0.00384996	sp|P53441|CATR_NAEGR Caltractin OS=Naegleria gruberi OX=5762 GN=CTN PE=2 SV=1	AT4G20780	calmodulin like 42|CML42		Upregulated
Potra2n1c3594	196.956	1.27807	0.000244752	sp|P12688|YPK1_YEAST Serine/threonine-protein kinase YPK1 OS=Saccharomyces cerevisiae (strain ATCC 204508 / S288c) OX=559292 GN=YPK1 PE=1 SV=2	AT4G21380	receptor kinase 3		Upregulated
Potra2n3c7734	6.7304	2.68437	0.0402449		AT4G21700	DUF2921 family protein, putative (DUF2921)		Upregulated
Potra2n17c31404	41.7776	1.4509	0.00184905	sp|B9HMP6|CSPL7_POPTR CASP-like protein 1E1 OS=Populus trichocarpa OX=3694 GN=POPTRDRAFT_820934 PE=3 SV=2	AT4G25040	Uncharacterized protein family (UPF0497)		Upregulated
Potra2n4c10459	70.5079	1.24015	0.00684728	sp|Q76P07|Y7165_DICDI Probable serine/threonine-protein kinase DDB_G0277165 OS=Dictyostelium discoideum OX=44689 GN=DDB_G0277165 PE=3 SV=1	AT4G25160	U-box domain-containing protein kinase family protein		Upregulated
Potra2n3c7551	131.568	1.19378	0.034189		AT4G25170	Uncharacterized conserved protein (UCP012943)		Upregulated
Potra2n6c15114	16.4139	-2.80191	0.00775324	sp|Q00445|HS21C_WHEAT Small heat shock protein, chloroplastic OS=Triticum aestivum OX=4565 GN=HSP21 PE=2 SV=1	AT4G25200	mitochondrion-localized small heat shock protein 23.6|ATHSP23.6-MITO,HSP23.6-MITO		Downregulated
Potra2n1c3583	40.6102	1.46608	0.00261089	sp|C0LGH3|Y5614_ARATH Probable LRR receptor-like serine/threonine-protein kinase At1g56140 OS=Arabidopsis thaliana OX=3702 GN=At1g56140 PE=2 SV=2	AT4G27290	S-locus lectin protein kinase family protein		Upregulated
Potra2n18c31948	134.766	1.22902	0.000703054	sp|A0AJS6|STP1_LISW6 Serine/threonine phosphatase stp OS=Listeria welshimeri serovar 6b (strain ATCC 35897 / DSM 20650 / SLCC5334) OX=386043 GN=stp PE=3 SV=1	AT4G28400	Protein phosphatase 2C family protein		Upregulated
Potra2n17c31812	91.7733	1.35161	0.000103371	sp|Q56X72|RTNLS_ARATH Reticulon-like protein B21 OS=Arabidopsis thaliana OX=3702 GN=RTNLB21 PE=2 SV=2	AT4G28430	Reticulon family protein		Upregulated
Potra2n18c32976	333.434	1.901	0.0408975	sp|Q9M0C2|EGC1_ARATH Putative EG45-like domain containing protein 1 OS=Arabidopsis thaliana OX=3702 GN=EGC1 PE=3 SV=1	AT4G30380	Barwin-related endoglucanase		Upregulated
Potra2n6c13785	35.2963	1.18837	0.0357495	sp|O22133|BEN1_ARATH Protein BRI1-5 ENHANCED 1 OS=Arabidopsis thaliana OX=3702 GN=BEN1 PE=2 SV=1	AT4G30470	NAD(P)-binding Rossmann-fold superfamily protein		Upregulated
Potra2n9c19157	29.5189	2.36803	0.00190739	sp|Q9VG82|CP9F2_DROME Probable cytochrome P450 9f2 OS=Drosophila melanogaster OX=7227 GN=Cyp9f2 PE=2 SV=1	AT4G31940	cytochrome P450, family 82, subfamily C, polypeptide 4|CYP82C4		Upregulated
Potra2n4c10071	277.145	2.38639	0.0170655	sp|A1ZAI3|FACR2_DROME Putative fatty acyl-CoA reductase CG8303 OS=Drosophila melanogaster OX=7227 GN=CG8303 PE=2 SV=3	AT4G33790	Jojoba acyl CoA reductase-related male sterility protein		Upregulated
Potra2n5c11919	10.0653	3.77092	0.02317	sp|P11934|CATA_PENJA Catalase OS=Penicillium janthinellum OX=5079 PE=1 SV=1	AT4G35090	catalase 2|CAT2		Upregulated
Potra2n7c16357	211.805	-1.32444	0.033894		AT4G36790	Major facilitator superfamily protein		Downregulated
Potra2n7c16596	254.591	1.71678	0.00180109	sp|Q6DC77|MPRGB_DANRE Membrane progestin receptor gamma-B OS=Danio rerio OX=7955 GN=paqr5b PE=2 SV=1	AT4G37680	heptahelical protein 4		Upregulated
Potra2n1c2317	47.3747	1.56434	0.0139854	sp|P25984|ADH_CLOBE NADP-dependent isopropanol dehydrogenase OS=Clostridium beijerinckii OX=1520 GN=adh PE=1 SV=2	AT4G37980	cinnamyl alcohol dehydrogenase 7|ATCAD7,CAD7,ELI3,ELI3-1		Upregulated
Potra2n5c12114	101.751	1.27967	0.000340407	sp|Q6P531|GGT6_HUMAN Glutathione hydrolase 6 OS=Homo sapiens OX=9606 GN=GGT6 PE=2 SV=2	AT4G39640	gamma-glutamyl transpeptidase 1|GGT1		Upregulated
Potra2n5c12138	15.2401	-1.53162	0.037513	sp|Q4IN00|FKBP2_GIBZE FK506-binding protein 2 OS=Gibberella zeae (strain PH-1 / ATCC MYA-4620 / FGSC 9075 / NRRL 31084) OX=229533 GN=FPR2 PE=3 SV=2	AT4G39710	FK506-binding protein 16-2		Downregulated
Potra2n4c9589	194.166	1.78071	1.624e-08	sp|Q2V2V3|PLAT3_ARATH PLAT domain-containing protein 3 OS=Arabidopsis thaliana OX=3702 GN=PLAT3 PE=4 SV=1	AT4G39730	Lipase/lipooxygenase, PLAT/LH2 family protein		Upregulated
Potra2n16c30279	1088.65	1.30811	0.00240431	sp|C4L3L1|GLGA_EXISA Glycogen synthase OS=Exiguobacterium sp. (strain ATCC BAA-1283 / AT1b) OX=360911 GN=glgA PE=3 SV=1	AT5G01220	sulfoquinovosyldiacylglycerol 2|SQD2		Upregulated
Potra2n6c14482	859.625	1.42607	5.20512e-05	sp|P71243|WCAL_ECOLI Putative colanic acid biosynthesis glycosyltransferase WcaL OS=Escherichia coli (strain K12) OX=83333 GN=wcaL PE=3 SV=2	AT5G01220	sulfoquinovosyldiacylglycerol 2|SQD2		Upregulated
Potra2n16c30280	15.1636	2.00441	0.0345904		AT5G01225	josephin-like protein		Upregulated
Potra2n16c30328	25.1913	-1.51347	0.0291256		AT5G01370	ALC-interacting protein 1|ACI1		Downregulated
Potra2n6c14421	82.9673	1.65696	0.0127591	sp|P41822|FRI_AEDAE Ferritin subunit OS=Aedes aegypti OX=7159 GN=FERH PE=1 SV=2	AT5G01600	ferretin 1|ATFER1,FER1		Upregulated
Potra2n6c14360	1377.16	1.33875	6.508e-10	sp|A8WVU9|ROCK_CAEBR Rho-associated protein kinase let-502 OS=Caenorhabditis briggsae OX=6238 GN=let-502 PE=3 SV=2	AT5G01920	Protein kinase superfamily protein		Upregulated
Potra2n6c14579	207.35	1.26361	0.00189482	sp|P53078|SDT1_YEAST Suppressor of disruption of TFIIS OS=Saccharomyces cerevisiae (strain ATCC 204508 / S288c) OX=559292 GN=SDT1 PE=1 SV=1	AT5G02230	Haloacid dehalogenase-like hydrolase (HAD) superfamily protein		Upregulated
Potra2n19c33346	23.9332	-5.3128	0.0269436	sp|Q9SJ81|FLA7_ARATH Fasciclin-like arabinogalactan protein 7 OS=Arabidopsis thaliana OX=3702 GN=FLA7 PE=2 SV=1	AT5G03170	FASCICLIN-like arabinogalactan-protein 11|ATFLA11,FLA11		Downregulated
Potra2n8c16935	49.2216	1.34145	0.0309182	sp|Q9XIP2|OTU6_ARATH OVARIAN TUMOR DOMAIN-containing deubiquitinating enzyme 6 OS=Arabidopsis thaliana OX=3702 GN=OTU6 PE=1 SV=2	AT5G04250	Cysteine proteinases superfamily protein		Upregulated
Potra2n16c30330	152.389	1.40217	0.00796879	sp|O34653|DES_BACSU Fatty acid desaturase OS=Bacillus subtilis (strain 168) OX=224308 GN=des PE=2 SV=1	AT5G05580	fatty acid desaturase 8|FAD8		Upregulated
Potra2n9c18949	1365.18	1.60505	0.000635593	sp|F4J1Q9|AVT1I_ARATH Amino acid transporter AVT1I OS=Arabidopsis thaliana OX=3702 GN=AVT1I PE=3 SV=1	AT5G09220	amino acid permease 2|AAP2		Upregulated
Potra2n7c15499	316.294	-1.04974	3.35051e-06	sp|Q9FIX3|PP407_ARATH Pentatricopeptide repeat-containing protein At5g39710 OS=Arabidopsis thaliana OX=3702 GN=EMB2745 PE=2 SV=1	AT5G09315	vacuolar sorting protein 9 domain protein		Downregulated
Potra2n2c5528	47.8719	-2.29504	0.0343879	sp|H2KZ86|ABH52_CAEEL Abhydrolase domain-containing protein abhd-5.2 OS=Caenorhabditis elegans OX=6239 GN=abhd-5.2 PE=1 SV=1	AT5G09430	alpha/beta-Hydrolases superfamily protein		Downregulated
Potra2n154s34742	129.883	1.31865	0.0435043		AT5G12950	proline-tRNA ligase (DUF1680)		Upregulated
Potra2n1c494	2689.7	2.33118	9.12495e-29	sp|Q24625|G6PD_DROSI Glucose-6-phosphate 1-dehydrogenase (Fragment) OS=Drosophila simulans OX=7240 GN=Zw PE=2 SV=1	AT5G13110	glucose-6-phosphate dehydrogenase 2|G6PD2		Upregulated
Potra2n10c20512	87.0885	2.00499	0.00122245	sp|P33916|YEJF_ECOLI Uncharacterized ABC transporter ATP-binding protein YejF OS=Escherichia coli (strain K12) OX=83333 GN=yejF PE=1 SV=1	AT5G13580	ABC-2 type transporter family protein		Upregulated
Potra2n15c28548	160.686	1.66377	8.64652e-05	sp|P40974|PUO_KOCRO Putrescine oxidase OS=Kocuria rosea OX=1275 GN=puo PE=1 SV=1	AT5G13700	polyamine oxidase 1|APAO,ATPAO1,PAO1		Upregulated
Potra2n8c16718	82.8889	2.05365	3.1563e-07	sp|Q0P5M9|MFS10_BOVIN Major facilitator superfamily domain-containing protein 10 OS=Bos taurus OX=9913 GN=MFSD10 PE=2 SV=1	AT5G13750	zinc induced facilitator-like 1|ZIFL1		Upregulated
Potra2n14c27704	1138.93	1.17532	2.2429e-07	sp|P53100|YGT5_YEAST Putative 2-hydroxyacid dehydrogenase YGL185C OS=Saccharomyces cerevisiae (strain ATCC 204508 / S288c) OX=559292 GN=YGL185C PE=1 SV=1	AT5G14780	formate dehydrogenase		Upregulated
Potra2n4c9502	1598.98	-5.71267	0.00510344	sp|Q9LJU0|CBL10_ARATH COBRA-like protein 10 OS=Arabidopsis thaliana OX=3702 GN=COBL10 PE=2 SV=1	AT5G15630	COBRA-like extracellular glycosyl-phosphatidyl inositol-anchored protein family		Downregulated
Potra2n17c31035	3714.01	-1.55731	0.0411619	sp|Q0WPA5|MSR2_ARATH Protein MANNAN SYNTHESIS-RELATED 2 OS=Arabidopsis thaliana OX=3702 GN=MSR2 PE=2 SV=1	AT5G15740	O-fucosyltransferase family protein		Downregulated
Potra2n17c30664	1662.75	-1.10922	0.0425089	sp|Q5HM59|URTF_STAEQ Probable uridylyltransferase SERP1770 OS=Staphylococcus epidermidis (strain ATCC 35984 / RP62A) OX=176279 GN=SERP1770 PE=3 SV=1	AT5G17310	UDP-glucose pyrophosphorylase 2|AtUGP2,UGP2		Downregulated
Potra2n8c18476	240.653	1.24474	0.0086298		AT5G18980	ARM repeat superfamily protein		Upregulated
Potra2n10c22148	10.878	2.70604	0.00947206	sp|A7ZB92|MIAA_CAMC1 tRNA dimethylallyltransferase OS=Campylobacter concisus (strain 13826) OX=360104 GN=miaA PE=3 SV=1	AT5G19040	isopentenyltransferase 5|ATIPT5,IPT5		Upregulated
Potra2n6c14819	176.54	1.16713	0.00522999	sp|A0M527|MURG_GRAFK UDP-N-acetylglucosamine--N-acetylmuramyl-(pentapeptide) pyrophosphoryl-undecaprenol N-acetylglucosamine transferase OS=Gramella forsetii (strain KT0803) OX=411154 GN=murG PE=3 SV=1	AT5G20410	monogalactosyldiacylglycerol synthase 2|ATMGD2,MGD2		Upregulated
Potra2n18c32199	1329.16	1.28049	9.44071e-12	sp|Q820X3|MURG_COXBU UDP-N-acetylglucosamine--N-acetylmuramyl-(pentapeptide) pyrophosphoryl-undecaprenol N-acetylglucosamine transferase OS=Coxiella burnetii (strain RSA 493 / Nine Mile phase I) OX=227377 GN=murG PE=3 SV=1	AT5G20410	monogalactosyldiacylglycerol synthase 2|ATMGD2,MGD2		Upregulated
Potra2n6c14095	193.999	1.57961	6.14197e-06		AT5G20790	transmembrane protein		Upregulated
Potra2n3c8258	29.9562	-1.23615	0.0170655	sp|Q2QWE9|SGS3_ORYSJ Protein SUPPRESSOR OF GENE SILENCING 3 homolog OS=Oryza sativa subsp. japonica OX=39947 GN=SGS3 PE=3 SV=1	AT5G23570	XS domain-containing protein / XS zinc finger domain-containing protein-like protein		Downregulated
Potra2n681s36450	44.8844	-1.04012	0.0160865	sp|Q2QWE9|SGS3_ORYSJ Protein SUPPRESSOR OF GENE SILENCING 3 homolog OS=Oryza sativa subsp. japonica OX=39947 GN=SGS3 PE=3 SV=1	AT5G23570	XS domain-containing protein / XS zinc finger domain-containing protein-like protein		Downregulated
Potra2n127s34661	10.4271	2.47582	0.00822553	sp|C0LGV0|Y5487_ARATH Probable LRR receptor-like serine/threonine-protein kinase At5g48740 OS=Arabidopsis thaliana OX=3702 GN=At5g48740 PE=1 SV=1	AT5G24080	Protein kinase superfamily protein		Upregulated
Potra2n5c12621	682.776	1.65828	6.77252e-21		AT5G27760	Hypoxia-responsive family protein		Upregulated
Potra2n18c32188	250.283	1.02263	0.000180249	sp|B5Z428|CLCB_ECO5E Voltage-gated ClC-type chloride channel ClcB OS=Escherichia coli O157:H7 (strain EC4115 / EHEC) OX=444450 GN=clcB PE=3 SV=1	AT5G33280	Voltage-gated chloride channel family protein		Upregulated
Potra2n2c4494	190.098	1.43527	0.00384996	sp|A2VE04|FRRS1_BOVIN Ferric-chelate reductase 1 OS=Bos taurus OX=9913 GN=FRRS1 PE=2 SV=1	AT5G35735	Auxin-responsive family protein		Upregulated
Potra2n11c22478	1523.52	1.20641	0.00486875	sp|Q04468|TCMO_HELTU Trans-cinnamate 4-monooxygenase OS=Helianthus tuberosus OX=4233 GN=CYP73A1 PE=1 SV=1	AT5G36110	cytochrome P450, family 716, subfamily A, polypeptide 1		Upregulated
Potra2n4c9507	20.1309	-3.32957	0.00644711	sp|P24456|CP2DA_MOUSE Cytochrome P450 2D10 OS=Mus musculus OX=10090 GN=Cyp2d10 PE=1 SV=2	AT5G38970	brassinosteroid-6-oxidase 1		Downregulated
Potra2n19c34199	40.4105	2.15063	0.0116338	sp|P41836|PRS8_SCHPO 26S proteasome regulatory subunit 8 homolog OS=Schizosaccharomyces pombe (strain 972 / ATCC 24843) OX=284812 GN=let1 PE=3 SV=1	AT5G40010	AAA-ATPase 1|AATP1		Upregulated
Potra2n8c18353	53.1947	1.0544	0.014306	sp|Q1G3Y4|SMR15_ARATH Cyclin-dependent protein kinase inhibitor SMR15 OS=Arabidopsis thaliana OX=3702 GN=SMR15 PE=3 SV=1	AT5G40460	cyclin-dependent kinase inhibitor SMR3-like protein		Upregulated
Potra2n1c2934	396.439	1.96983	0.0084857	sp|Q9SVG0|AVT3C_ARATH Amino acid transporter AVT3C OS=Arabidopsis thaliana OX=3702 GN=AVT3C PE=1 SV=1	AT5G40780	lysine histidine transporter 1|LHT1		Upregulated
Potra2n3c7270	1184.46	1.17516	3.13639e-12	sp|Q55702|Y229_SYNY3 Uncharacterized oxidoreductase slr0229 OS=Synechocystis sp. (strain PCC 6803 / Kazusa) OX=1111708 GN=slr0229 PE=3 SV=1	AT5G41670	6-phosphogluconate dehydrogenase family protein		Upregulated
Potra2n1c796	2371.26	2.97103	1.4485e-56	sp|Q55702|Y229_SYNY3 Uncharacterized oxidoreductase slr0229 OS=Synechocystis sp. (strain PCC 6803 / Kazusa) OX=1111708 GN=slr0229 PE=3 SV=1	AT5G41670	6-phosphogluconate dehydrogenase family protein		Upregulated
Potra2n2c6308	2129.94	1.0343	0.0107363	sp|A4IF94|MF14B_BOVIN Hippocampus abundant transcript-like protein 1 OS=Bos taurus OX=9913 GN=MFSD14B PE=2 SV=1	AT5G42210	Major facilitator superfamily protein		Upregulated
Potra2n5c11916	19.0137	1.12835	0.027075	sp|P13240|DR206_PEA Disease resistance response protein 206 OS=Pisum sativum OX=3888 GN=PI206 PE=1 SV=2	AT5G42510	Disease resistance-responsive (dirigent-like protein) family protein		Upregulated
Potra2n14c26583	274.187	-1.06724	0.0238206		AT5G42690	transcription factor, putative (Protein of unknown function, DUF547)		Downregulated
Potra2n7c16259	195.211	1.81721	0.00980429	sp|Q9XTR8|LIP1_CAEEL Lipase ZK262.3 OS=Caenorhabditis elegans OX=6239 GN=ZK262.3 PE=1 SV=1	AT5G42930	alpha/beta-Hydrolases superfamily protein		Upregulated
Potra2n8c18152	13.9276	-1.37109	0.0425089	sp|Q9FNI6|SM3L2_ARATH DNA repair protein RAD5A OS=Arabidopsis thaliana OX=3702 GN=RAD5A PE=1 SV=1	AT5G43530	Helicase protein with RING/U-box domain-containing protein		Downregulated
Potra2n1c2361	187.085	1.51972	5.27413e-09	sp|P46154|FADH_PSEPU Glutathione-independent formaldehyde dehydrogenase OS=Pseudomonas putida OX=303 GN=fdhA PE=1 SV=3	AT5G43940	GroES-like zinc-binding dehydrogenase family protein|ADH2,ATGSNOR1,GSNOR,HOT5,PAR2		Upregulated
Potra2n650s36268	45.0656	2.16567	1.84586e-05	sp|O07737|Y1895_MYCTU Probable zinc-binding alcohol dehydrogenase Rv1895 OS=Mycobacterium tuberculosis (strain ATCC 25618 / H37Rv) OX=83332 GN=Rv1895 PE=1 SV=1	AT5G43940	GroES-like zinc-binding dehydrogenase family protein|ADH2,ATGSNOR1,GSNOR,HOT5,PAR2		Upregulated
Potra2n4c9619	74.5323	2.13368	0.0405796	sp|Q9SJA4|CNG14_ARATH Probable cyclic nucleotide-gated ion channel 14 OS=Arabidopsis thaliana OX=3702 GN=CNGC14 PE=2 SV=2	AT5G46240	1|KAT1		Upregulated
Potra2n14c26737	42.0795	1.27289	0.0410065	sp|Q552C1|Y9957_DICDI Probable serine/threonine-protein kinase DDB_G0276181 OS=Dictyostelium discoideum OX=44689 GN=DDB_G0276181 PE=3 SV=1	AT5G47070	Protein kinase superfamily protein		Upregulated
Potra2n9c19489	7.83316	-4.59197	0.0353462	sp|Q9LVH4|CAR4_ARATH Protein C2-DOMAIN ABA-RELATED 4 OS=Arabidopsis thaliana OX=3702 GN=CAR4 PE=1 SV=1	AT5G48060	C2 calcium/lipid-binding plant phosphoribosyltransferase family protein		Downregulated
Potra2n15c28440	167.928	5.76451	9.77017e-16	sp|Q7XK12|NAR22_ORYSJ Probable high-affinity nitrate transporter-activating protein 2.2 OS=Oryza sativa subsp. japonica OX=39947 GN=NAR2.2 PE=2 SV=1	AT5G50200	nitrate transmembrane transporter|ATNRT3.1,NRT3.1,WR3		Upregulated
Potra2n15c28441	129.221	5.90738	1.64508e-12	sp|Q7XK12|NAR22_ORYSJ Probable high-affinity nitrate transporter-activating protein 2.2 OS=Oryza sativa subsp. japonica OX=39947 GN=NAR2.2 PE=2 SV=1	AT5G50200	nitrate transmembrane transporter|ATNRT3.1,NRT3.1,WR3		Upregulated
Potra2n15c28437	56.7707	1.49941	0.00388745	sp|Q52742|Y1250_RHIEC Uncharacterized SufE-like protein RHE_CH01250 OS=Rhizobium etli (strain CFN 42 / ATCC 51251) OX=347834 GN=RHE_CH01250 PE=3 SV=2	AT5G50210	quinolinate synthase|OLD5,QS,SUFE3		Upregulated
Potra2n12c24798	214.833	-1.00756	0.0110427	sp|Q28DF4|PPM1H_XENTR Protein phosphatase 1H OS=Xenopus tropicalis OX=8364 GN=ppm1h PE=2 SV=1	AT5G51760	Protein phosphatase 2C family protein|AHG1		Downregulated
Potra2n3c7330	83.6684	1.09668	0.0481855	sp|Q9SRE5|Y1666_ARATH Uncharacterized protein At1g76660 OS=Arabidopsis thaliana OX=3702 GN=At1g76660 PE=2 SV=1	AT5G52430	hydroxyproline-rich glycoprotein family protein		Upregulated
Potra2n4c9079	35.5251	1.56967	0.0476564	sp|Q58FF3|ENPLL_HUMAN Putative endoplasmin-like protein OS=Homo sapiens OX=9606 GN=HSP90B2P PE=5 SV=1	AT5G52640	heat shock-like protein|ATHS83,AtHsp90-1,ATHSP90.1,HSP81-1,HSP81.1,HSP83,HSP90.1		Upregulated
Potra2n12c23799	281.179	-1.21083	0.00348828	sp|Q06593|OPT2_YEAST Oligopeptide transporter 2 OS=Saccharomyces cerevisiae (strain ATCC 204508 / S288c) OX=559292 GN=OPT2 PE=1 SV=1	AT5G53510	oligopeptide transporter 9|ATOPT9,OPT9		Downregulated
Potra2n16c29236	17.5492	-1.73242	0.027955		AT5G56190	Transducin/WD40 repeat-like superfamily protein		Downregulated
Potra2n3c6472	104.205	-1.3222	0.00486875	sp|P19680|KPYK_SPICI Pyruvate kinase (Fragment) OS=Spiroplasma citri OX=2133 GN=pyk PE=3 SV=1	AT5G56350	Pyruvate kinase family protein		Downregulated
Potra2n633s36227	7.26516	5.72475	0.00222244		AT5G57510	cotton fiber protein		Upregulated
Potra2n19c33300	5596.51	1.08722	0.00754643	sp|Q2QXC6|WNK9_ORYSJ Probable serine/threonine-protein kinase WNK9 OS=Oryza sativa subsp. japonica OX=39947 GN=WNK9 PE=2 SV=1	AT5G58350	with no lysine (K) kinase 4|WNK4,ZIK2		Upregulated
Potra2n9c19776	178.995	-1.06743	0.02317	sp|Q9LXU9|IRKI_ARATH IRK-interacting protein OS=Arabidopsis thaliana OX=3702 GN=IRKI PE=1 SV=1	AT5G58960	glucose-6-phosphate isomerase, putative (DUF641)|GIL1		Downregulated
Potra2n799s36770	44.585	1.01218	0.0487711	sp|Q9LX14|UFC_ARATH Protein UPSTREAM OF FLC OS=Arabidopsis thaliana OX=3702 GN=UFC PE=2 SV=1	AT5G59790	UPSTREAM OF FLC protein (DUF966)		Upregulated
Potra2n13c25021	466.267	-5.7548	0.00489784	sp|Q9SIL7|FLA6_ARATH Fasciclin-like arabinogalactan protein 6 OS=Arabidopsis thaliana OX=3702 GN=FLA6 PE=2 SV=2	AT5G60490	FASCICLIN-like arabinogalactan-protein 12|FLA12		Downregulated
Potra2n19c33344	3146.74	-5.09407	0.00684728	sp|Q9FM65|FLA1_ARATH Fasciclin-like arabinogalactan protein 1 OS=Arabidopsis thaliana OX=3702 GN=FLA1 PE=1 SV=1	AT5G60490	FASCICLIN-like arabinogalactan-protein 12|FLA12		Downregulated
Potra2n15c29105	392.882	-4.69061	0.00908383	sp|O22126|FLA8_ARATH Fasciclin-like arabinogalactan protein 8 OS=Arabidopsis thaliana OX=3702 GN=FLA8 PE=2 SV=1	AT5G60490	FASCICLIN-like arabinogalactan-protein 12|FLA12		Downregulated
Potra2n9c20009	767.98	-3.49024	0.0285746	sp|Q9FM65|FLA1_ARATH Fasciclin-like arabinogalactan protein 1 OS=Arabidopsis thaliana OX=3702 GN=FLA1 PE=1 SV=1	AT5G60490	FASCICLIN-like arabinogalactan-protein 12|FLA12		Downregulated
Potra2n4c10260	2913.56	-3.0674	0.019648	sp|Q9FM65|FLA1_ARATH Fasciclin-like arabinogalactan protein 1 OS=Arabidopsis thaliana OX=3702 GN=FLA1 PE=1 SV=1	AT5G60490	FASCICLIN-like arabinogalactan-protein 12|FLA12		Downregulated
Potra2n12c23847	6305.18	-2.95988	0.0458358	sp|Q9SNC3|FLA4_ARATH Fasciclin-like arabinogalactan protein 4 OS=Arabidopsis thaliana OX=3702 GN=FLA4 PE=1 SV=1	AT5G60490	FASCICLIN-like arabinogalactan-protein 12|FLA12		Downregulated
Potra2n12c24301	685.868	-2.21461	0.016089	sp|Q10113|MAL3_SCHPO Microtubule integrity protein mal3 OS=Schizosaccharomyces pombe (strain 972 / ATCC 24843) OX=284812 GN=mal3 PE=1 SV=1	AT5G62500	end binding protein 1B|ATEB1,ATEB1B,EB1B		Downregulated
Potra2n12c24414	393.722	1.33355	0.027075		AT5G62960	UDP-N-acetylglucosamine-N-acetylmuramyl-pyrophosphoryl-undecaprenol N-acetylglucosamine protein		Upregulated
Potra2n15c28518	506.611	1.34329	0.0280884		AT5G62960	UDP-N-acetylglucosamine-N-acetylmuramyl-pyrophosphoryl-undecaprenol N-acetylglucosamine protein		Upregulated
Potra2n17c31507	533.078	1.0723	2.16519e-06		AT5G64230	1,8-cineole synthase		Upregulated
Potra2n17c31519	23.1546	1.21556	0.0296094	sp|B0T7X2|LLDD_CAUSK L-lactate dehydrogenase OS=Caulobacter sp. (strain K31) OX=366602 GN=lldD PE=3 SV=1	AT5G64250	Aldolase-type TIM barrel family protein		Upregulated
Potra2n14c26589	131.516	1.00392	0.0303483	sp|Q9FHK7|Y5516_ARATH Probable leucine-rich repeat receptor-like protein kinase At5g05160 OS=Arabidopsis thaliana OX=3702 GN=At5g05160 PE=2 SV=1	AT5G66850	mitogen-activated protein kinase kinase kinase 5|MAPKKK5		Upregulated
Potra2n203s34950	65.3936	1.52143	0.0200792	sp|F4JT82|RPP2C_ARATH Probable disease resistance protein At4g19520 OS=Arabidopsis thaliana OX=3702 GN=At4g19520 PE=3 SV=1	AT5G66900	Disease resistance protein (CC-NBS-LRR class) family		Upregulated
Potra2n14c26522	418.659	1.01457	0.0148733	sp|P29600|SUBS_BACLE Subtilisin Savinase OS=Bacillus lentus OX=1467 PE=1 SV=1	AT5G67090	Subtilisin-like serine endopeptidase family protein		Upregulated
Potra2n14c26520	26.1003	2.25057	0.0273314	sp|O31788|APRX_BACSU Serine protease AprX OS=Bacillus subtilis (strain 168) OX=224308 GN=aprX PE=1 SV=1	AT5G67090	Subtilisin-like serine endopeptidase family protein		Upregulated
Potra2n7c16179	57.1032	1.97484	0.0120288	sp|O78501|YCF36_GUITH Uncharacterized protein ycf36 OS=Guillardia theta OX=55529 GN=ycf36 PE=3 SV=1	AT5G67370	DUF1230 family protein (DUF1230)		Upregulated
Potra2n10c20603	283.517	2.2614	0.0246659		AT2G16050	Cysteine/Histidine-rich C1 domain family protein	PHD	Upregulated
Potra2n14c27340	61.0172	1.17831	0.00106929	sp|A0JNA8|PAXI1_BOVIN PAX-interacting protein 1 OS=Bos taurus OX=9913 GN=PAXIP1 PE=2 SV=1	AT4G02110	transcription coactivator	PHD	Upregulated
Potra2n16c29633	11.7516	1.59338	0.0458102		AT4G11550	Cysteine/Histidine-rich C1 domain family protein	PHD	Upregulated
Potra2n7c16104	98.516	1.15904	0.0239233	sp|Q1XDE4|YCF29_PYRYE Probable transcriptional regulator ycf29 OS=Pyropia yezoensis OX=2788 GN=ycf29 PE=3 SV=1	AT2G17820	histidine kinase 1|AHK1,ATHK1,HK1	RR-A-type	Upregulated
Potra2n7c16146	834.669	1.18074	0.00338556	sp|P32040|Y851_SYNP2 Probable transcriptional regulatory protein SYNPCC7002_A0851 OS=Synechococcus sp. (strain ATCC 27264 / PCC 7002 / PR-6) OX=32049 GN=SYNPCC7002_A0851 PE=3 SV=2	AT2G17820	histidine kinase 1|AHK1,ATHK1,HK1	RR-A-type	Upregulated
Potra2n268s35171	55.7236	1.33437	0.000140754	sp|Q8FK37|CUSS_ECOL6 Sensor histidine kinase CusS OS=Escherichia coli O6:H1 (strain CFT073 / ATCC 700928 / UPEC) OX=199310 GN=cusS PE=3 SV=1	AT2G17820	histidine kinase 1|AHK1,ATHK1,HK1	RR-A-type	Upregulated
Potra2n16c29552	70.7116	1.24846	0.0261428	sp|Q8CQ17|SAER_STAES Response regulator SaeR OS=Staphylococcus epidermidis (strain ATCC 12228) OX=176280 GN=saeR PE=1 SV=1	AT3G57040	response regulator 9	RR-A-type	Upregulated
Potra2n2c5045	48.7485	1.03831	0.00792452	sp|Q9M1U4|TCP16_ARATH Transcription factor TCP16 OS=Arabidopsis thaliana OX=3702 GN=TCP16 PE=1 SV=1	AT2G45680	TCP family transcription factor	TCP	Upregulated
Potra2n18c33092	102.076	2.1113	0.00363286	sp|Q9SZ67|WRK19_ARATH Probable WRKY transcription factor 19 OS=Arabidopsis thaliana OX=3702 GN=WRKY19 PE=3 SV=1	AT1G80840	WRKY DNA-binding protein 40|ATWRKY40,WRKY40	WRKY	Upregulated
Potra2n6c14364	119.264	1.91719	0.00124283	sp|Q9LG05|WRK10_ARATH Probable WRKY transcription factor 10 OS=Arabidopsis thaliana OX=3702 GN=WRKY10 PE=1 SV=2	AT3G56400	WRKY DNA-binding protein 70|ATWRKY70,WRKY70	WRKY	Upregulated
Potra2n2c4882	39.5485	2.77091	0.00336163	sp|Q6IEK5|WRK76_ORYSI WRKY transcription factor WRKY76 OS=Oryza sativa subsp. indica OX=39946 GN=WRKY76 PE=2 SV=1	AT4G11070	WRKY family transcription factor|AtWRKY41,WRKY41	WRKY	Upregulated
Potra2n14c27101	89.5433	1.70149	0.00837864	sp|Q9LG05|WRK10_ARATH Probable WRKY transcription factor 10 OS=Arabidopsis thaliana OX=3702 GN=WRKY10 PE=1 SV=2	AT4G23810	WRKY family transcription factor|ATWRKY53,WRKY53	WRKY	Upregulated
Potra2n5c10502	69.3917	1.14496	0.0124276		AT1G21000	PLATZ transcription factor family protein	Znf-B	Upregulated

## Sheet: S1C_8h
Gene_Id	Base_Mean	Log2_Fold_Change	False_Discovery_Rate	UniProt_Description	Best Arabidospsis hit	TAIR_description	TF family	Level_after_nitrate_treatment
Potra2n14c26863	36.8667	-2.50416	0.014895	sp|O82198|LBD9_ARATH LOB domain-containing protein 9 OS=Arabidopsis thaliana OX=3702 GN=LBD9 PE=2 SV=1	AT2G45410	LOB domain-containing protein 19|LBD19	AS2-LOB	Downregulated
Potra2n8c17940	483.364	-1.17315	0.00212966	sp|A3KFM7|CHD6_MOUSE Chromodomain-helicase-DNA-binding protein 6 OS=Mus musculus OX=10090 GN=Chd6 PE=1 SV=1	AT2G02090	SNF2 domain-containing protein / helicase domain-containing protein|CHA19,CHR19,ETL1	bHLH	Downregulated
Potra2n1c2577	45.0724	-2.25092	0.00516125	sp|Q9LX85|ZAT8_ARATH Zinc finger protein ZAT8 OS=Arabidopsis thaliana OX=3702 GN=ZAT8 PE=2 SV=1	AT1G27730	salt tolerance zinc finger|STZ,ZAT10	C2H2	Downregulated
Potra2n17c31070	21.8395	-1.35463	0.0230882		AT1G21280	Copia-like polyprotein/retrotransposon	CCHC(Zn)	Downregulated
Potra2n12c24315	1995.28	-1.00242	0.0190135	sp|P32443|MEOX2_MOUSE Homeobox protein MOX-2 OS=Mus musculus OX=10090 GN=Meox2 PE=2 SV=1	AT4G40060	homeobox protein 16|ATHB-16,ATHB16,HB16	Homobox-WOX	Downregulated
Potra2n7c16489	401.273	-1.26643	0.024212	sp|P07249|ARGR1_YEAST Arginine metabolism regulation protein I OS=Saccharomyces cerevisiae (strain ATCC 204508 / S288c) OX=559292 GN=ARG80 PE=1 SV=2	AT3G54340	K-box region and MADS-box transcription factor family protein|AP3,ATAP3	MADS-MIKC	Downregulated
Potra2n5c11136	97.1654	-1.12674	0.0375282	sp|Q9FX53|TGT1_ARATH Trihelix transcription factor GT-1 OS=Arabidopsis thaliana OX=3702 GN=GT-1 PE=1 SV=1	AT1G76880	Duplicated homeodomain-like superfamily protein	MYB	Downregulated
Potra2n14c26606	53.806	-1.06618	0.0219606	sp|Q9FX84|HHO6_ARATH Transcription factor HHO6 OS=Arabidopsis thaliana OX=3702 GN=HHO6 PE=2 SV=1	AT5G42630	Homeodomain-like superfamily protein|ATS,KAN4	MYB-HB-like	Downregulated
Potra2n5c10826	110.612	-2.2492	0.0227903	sp|Q5PP28|NAC3_ARATH NAC domain-containing protein 3 OS=Arabidopsis thaliana OX=3702 GN=NAC003 PE=2 SV=1	AT4G28530	NAC domain containing protein 74|anac074,NAC074	NAM	Downregulated
Potra2n1c1212	1971.62	-1.97428	0.0360541					Downregulated
Potra2n8c17168	121.846	-1.81962	0.0474636					Downregulated
Potra2n2c4050	28.7963	-1.59899	0.0221595					Downregulated
Potra2n4c10281	449.391	-1.39919	0.0127638					Downregulated
Potra2n2c6134	34.9767	-1.28056	0.0153375					Downregulated
Potra2n5c12474	66.4424	-1.07047	0.0117829					Downregulated
Potra2n4c8435	184.049	-1.43157	0.0421975	sp|D7PHZ1|VRTI_PENAE Oxidoreductase vrtI OS=Penicillium aethiopicum OX=36650 GN=vrtI PE=1 SV=1	AT1G05010	ethylene-forming enzyme|ACO4,EAT1,EFE		Downregulated
Potra2n17c31708	1120.95	-2.30277	0.0271123	sp|Q7XZP5|APX5_ARATH L-ascorbate peroxidase 5, peroxisomal OS=Arabidopsis thaliana OX=3702 GN=APX5 PE=1 SV=2	AT1G05260	Peroxidase superfamily protein|RCI3,RCI3A		Downregulated
Potra2n5c10888	72.3499	-1.30199	0.0227903	sp|F4IZW8|AVT1F_ARATH Amino acid transporter AVT1F OS=Arabidopsis thaliana OX=3702 GN=AVT1F PE=3 SV=1	AT1G08230	Transmembrane amino acid transporter family protein		Downregulated
Potra2n5c12551	1964.75	-1.09975	0.0121405	sp|A6ZQJ2|GLG2_YEAS7 Glycogenin-2 OS=Saccharomyces cerevisiae (strain YJM789) OX=307796 GN=GLG2 PE=3 SV=1	AT1G08990	plant glycogenin-like starch initiation protein 5|PGSIP5		Downregulated
Potra2n1c3711	68.8882	-1.5058	0.0265837	sp|P81124|GSTO_APLCA Probable glutathione transferase (Fragment) OS=Aplysia californica OX=6500 PE=1 SV=1	AT1G17180	glutathione S-transferase TAU 25|ATGSTU25,GSTU25		Downregulated
Potra2n1c1484	327.854	-1.80494	0.0436737	sp|B1ZB18|RUTD_METPB Putative aminoacrylate hydrolase RutD OS=Methylorubrum populi (strain ATCC BAA-705 / NCIMB 13946 / BJ001) OX=441620 GN=rutD PE=3 SV=1	AT1G17430	alpha/beta-Hydrolases superfamily protein		Downregulated
Potra2n1c1724	25.7553	1.15523	0.0342155	sp|Q6L5H6|P2C50_ORYSJ Protein phosphatase 2C 50 OS=Oryza sativa subsp. japonica OX=39947 GN=PP2C50 PE=1 SV=1	AT1G17550	homology to ABI2|HAB2		Upregulated
Potra2n3c8098	454.488	-1.30211	0.0160915	sp|Q8LD98|NHL6_ARATH NDR1/HIN1-like protein 6 OS=Arabidopsis thaliana OX=3702 GN=NHL6 PE=1 SV=1	AT1G17620	Late embryogenesis abundant (LEA) hydroxyproline-rich glycoprotein family		Downregulated
Potra2n1c478	192.369	-1.65852	0.00439909		AT1G27290	transmembrane protein		Downregulated
Potra2n19c33806	1624.52	-1.07039	0.0241068	sp|P94408|YCLF_BACSU Uncharacterized transporter YclF OS=Bacillus subtilis (strain 168) OX=224308 GN=yclF PE=3 SV=2	AT1G33440	Major facilitator superfamily protein		Downregulated
Potra2n4c9733	2096.89	-1.33579	0.00120689	sp|Q6BIB1|CCPR2_DEBHA Putative heme-binding peroxidase OS=Debaryomyces hansenii (strain ATCC 36239 / CBS 767 / JCM 1990 / NBRC 0083 / IGC 2968) OX=284592 GN=DEHA2G12166g PE=3 SV=3	AT1G49570	Peroxidase superfamily protein		Downregulated
Potra2n4c9690	769.456	-1.5315	0.0492182	sp|Q93XX5|Y5713_ARATH PI-PLC X domain-containing protein At5g67130 OS=Arabidopsis thaliana OX=3702 GN=At5g67130 PE=1 SV=1	AT1G49740	PLC-like phosphodiesterases superfamily protein		Downregulated
Potra2n377s35475	22.7945	-1.41892	0.0356536	sp|B4LXW1|SUR8_DROVI Leucine-rich repeat protein soc-2 homolog OS=Drosophila virilis OX=7244 GN=Sur-8 PE=3 SV=1	AT1G50180	NB-ARC domain-containing disease resistance protein		Downregulated
Potra2n1c1591	182.716	-1.73338	0.0359879		AT1G52330	Late embryogenesis abundant (LEA) hydroxyproline-rich glycoprotein family		Downregulated
Potra2n1c889	721.463	-1.13598	0.0186844	sp|Q58378|PATS_METJA Soluble P-type ATPase-like phosphatase OS=Methanocaldococcus jannaschii (strain ATCC 43067 / DSM 2661 / JAL-1 / JCM 10045 / NBRC 100440) OX=243232 GN=patS PE=1 SV=3	AT1G63440	heavy metal atpase 5|HMA5		Downregulated
Potra2n10c22127	439.065	-1.82088	0.0225024	sp|Q9P380|PTR2_SCHPO Probable peptide transporter ptr2 OS=Schizosaccharomyces pombe (strain 972 / ATCC 24843) OX=284812 GN=ptr2 PE=1 SV=1	AT1G69870	nitrate transporter 1.7|NRT1.7		Downregulated
Potra2n19c33630	199.088	-2.01893	0.0161062	sp|P31826|YDDA_ECOLI Inner membrane ABC transporter ATP-binding protein YddA OS=Escherichia coli (strain K12) OX=83333 GN=yddA PE=1 SV=2	AT1G71960	ATP-binding casette family G25|ABCG25,ATABCG25		Downregulated
Potra2n495s35812	84.5189	-1.36137	0.0241983	sp|Q8T683|ABCG9_DICDI ABC transporter G family member 9 OS=Dictyostelium discoideum OX=44689 GN=abcG9 PE=3 SV=1	AT1G71960	ATP-binding casette family G25|ABCG25,ATABCG25		Downregulated
Potra2n13c25348	125.528	-1.20904	0.00925327	sp|Q9A1G5|Y285_STRP1 Probable ABC transporter ATP-binding protein SPy_0285/M5005_Spy0242 OS=Streptococcus pyogenes serotype M1 OX=301447 GN=SPy_0285 PE=3 SV=1	AT1G71960	ATP-binding casette family G25|ABCG25,ATABCG25		Downregulated
Potra2n11c22566	62.9502	-1.77034	0.0437455	sp|Q9C999|PILS2_ARATH Protein PIN-LIKES 2 OS=Arabidopsis thaliana OX=3702 GN=PILS2 PE=2 SV=1	AT1G76520	Auxin efflux carrier family protein		Downregulated
Potra2n1c3716	99.3112	-2.28269	0.0390458	sp|Q9ZVQ3|GSTZ1_ARATH Glutathione S-transferase Z1 OS=Arabidopsis thaliana OX=3702 GN=GSTZ1 PE=1 SV=1	AT1G78340	glutathione S-transferase TAU 22|ATGSTU22,GSTU22		Downregulated
Potra2n3c6760	217.802	-1.05183	0.0288775	sp|Q9CA71|FUT3_ARATH Fucosyltransferase 3 OS=Arabidopsis thaliana OX=3702 GN=FUT3 PE=2 SV=3	AT2G03220	fucosyltransferase 1|ATFT1,ATFUT1,FT1,MUR2		Downregulated
Potra2n13c25099	98.0205	-1.09585	0.0257122	sp|P53843|IST1_YEAST Vacuolar protein sorting-associated protein IST1 OS=Saccharomyces cerevisiae (strain ATCC 204508 / S288c) OX=559292 GN=IST1 PE=1 SV=1	AT2G14830	Ist1p		Downregulated
Potra2n10c20602	398.095	-2.33204	0.0435327		AT2G16050	Cysteine/Histidine-rich C1 domain family protein		Downregulated
Potra2n9c19145	566.561	2.41511	2.89196e-16	sp|Q9FK13|PDV1_ARATH Plastid division protein PDV1 OS=Arabidopsis thaliana OX=3702 GN=PDV1 PE=1 SV=1	AT2G16070	plastid division2|PDV2		Upregulated
Potra2n246s35110	361.974	-1.15139	0.0217925	sp|C0LA90|PYRHY_SPHWJ Pyrethroid hydrolase OS=Sphingobium wenxiniae (strain DSM 21828 / JZ-1) OX=595605 GN=pytH PE=1 SV=1	AT2G23620	methyl esterase 1|ATMES1,MES1		Downregulated
Potra2n4c8905	46.3201	-1.28166	0.0421975	sp|Q6EUK7|PUB04_ORYSJ U-box domain-containing protein 4 OS=Oryza sativa subsp. japonica OX=39947 GN=PUB4 PE=2 SV=1	AT2G27430	ARM repeat superfamily protein		Downregulated
Potra2n4c10189	353.001	-1.04587	0.0194272	sp|P23101|XYLZ_PSEPU Toluate 1,2-dioxygenase electron transfer component OS=Pseudomonas putida OX=303 GN=xylZ PE=3 SV=1	AT2G27510	ferredoxin 3|ATFD3,FD3		Downregulated
Potra2n11c22450	2423.47	-1.16573	0.0138433	sp|P30986|RETO_ESCCA Reticuline oxidase OS=Eschscholzia californica OX=3467 GN=BBE1 PE=1 SV=1	AT2G34790	FAD-binding Berberine family protein|EDA28,MEE23		Downregulated
Potra2n2c5137	272.459	-1.09018	0.0166724	sp|Q8GYX2|FLZ14_ARATH FCS-Like Zinc finger 14 OS=Arabidopsis thaliana OX=3702 GN=FLZ14 PE=1 SV=1	AT2G44670	senescence-associated family protein (DUF581)		Downregulated
Potra2n14c27161	57.8419	1.95381	0.0432818		AT2G46630	serine/arginine repetitive matrix protein		Upregulated
Potra2n2c4816	37.2083	2.78107	0.0315817		AT2G46630	serine/arginine repetitive matrix protein		Upregulated
Potra2n4c9043	885.23	-1.15593	0.0311796	sp|P32901|PTR2_YEAST Peptide transporter PTR2 OS=Saccharomyces cerevisiae (strain ATCC 204508 / S288c) OX=559292 GN=PTR2 PE=1 SV=2	AT3G01350	Major facilitator superfamily protein		Downregulated
Potra2n8c17135	58.639	-1.99524	0.0315817	sp|Q9SYJ2|GPAT3_ARATH Probable glycerol-3-phosphate acyltransferase 3 OS=Arabidopsis thaliana OX=3702 GN=GPAT3 PE=2 SV=1	AT3G11430	glycerol-3-phosphate acyltransferase 5|ATGPAT5,GPAT5		Downregulated
Potra2n9c19485	93.5402	-1.15815	0.0480622	sp|A0A0E3D8P5|PC05_PENCR Cytochrome P450 monooxygenase PC-05 OS=Penicillium crustosum OX=36656 GN=PC-05 PE=3 SV=1	AT3G20090	cytochrome P450, family 705, subfamily A, polypeptide 18|CYP705A18		Downregulated
Potra2n6c15063	111.795	-2.1053	0.00388182	sp|Q720M2|Y1216_LISMF Putative ABC transporter ATP-binding protein LMOf2365_1216 OS=Listeria monocytogenes serotype 4b (strain F2365) OX=265669 GN=LMOf2365_1216 PE=3 SV=1	AT3G21250	multidrug resistance-associated protein 6		Downregulated
Potra2n10c22200	1060.96	-2.50651	0.0026598	sp|P05326|IPNS_EMENI Isopenicillin N synthase OS=Emericella nidulans (strain FGSC A4 / ATCC 38163 / CBS 112.46 / NRRL 194 / M139) OX=227321 GN=ipnA PE=1 SV=1	AT3G21420	2-oxoglutarate (2OG) and Fe(II)-dependent oxygenase superfamily protein		Downregulated
Potra2n8c18075	761.572	-1.14107	0.0119551	sp|Q8W4K5|VAB_ARATH VAN3-binding protein OS=Arabidopsis thaliana OX=3702 GN=VAB PE=1 SV=1	AT3G22810	auxin canalization protein (DUF828)		Downregulated
Potra2n4c10098	768.603	-1.49359	0.0121405	sp|Q8LA14|PSK6_ARATH Putative phytosulfokines 6 OS=Arabidopsis thaliana OX=3702 GN=PSK6 PE=2 SV=2	AT3G44735	PHYTOSULFOKINE 3 PRECURSOR|ATPSK3,PSK1,PSK3		Downregulated
Potra2n5c11696	109.73	-1.68637	0.000706777	sp|P30612|CP52P_CANTR Cytochrome P450 52C1 OS=Candida tropicalis OX=5482 GN=CYP52C1 PE=2 SV=1	AT3G50660	Cytochrome P450 superfamily protein		Downregulated
Potra2n3c6694	42.943	-1.73132	0.0420808	sp|F4JCX9|LNK2_ARATH Protein LNK2 OS=Arabidopsis thaliana OX=3702 GN=LNK2 PE=1 SV=1	AT3G54500	agglutinin-like protein		Downregulated
Potra2n6c14908	131.767	-1.00351	0.0161899	sp|P45306|PRC_HAEIN Tail-specific protease OS=Haemophilus influenzae (strain ATCC 51907 / DSM 11121 / KW20 / Rd) OX=71421 GN=prc PE=3 SV=1	AT3G57680	Peptidase S41 family protein		Downregulated
Potra2n15c28995	35.9851	-2.01991	0.0313092	sp|Q0VTB6|ZNUC_ALCBS Zinc import ATP-binding protein ZnuC OS=Alcanivorax borkumensis (strain ATCC 700651 / DSM 11573 / NCIMB 13689 / SK2) OX=393595 GN=znuC PE=3 SV=1	AT3G59140	multidrug resistance-associated protein 14|ATMRP14,MRP14		Downregulated
Potra2n6c13197	40.7882	-2.14114	0.0449405	sp|Q9BYV7|BCDO2_HUMAN Beta,beta-carotene 9',10'-oxygenase OS=Homo sapiens OX=9606 GN=BCO2 PE=1 SV=5	AT3G63520	carotenoid cleavage dioxygenase 1|ATCCD1,ATNCED1,CCD1,NCED1		Downregulated
Potra2n2c4985	45.8344	-1.10573	0.0265837	sp|P50392|PA24A_DANRE Cytosolic phospholipase A2 OS=Danio rerio OX=7955 GN=pla2g4a PE=2 SV=1	AT4G11610	C2 calcium/lipid-binding plant phosphoribosyltransferase family protein		Downregulated
Potra2n14c27366	364.047	-1.05941	0.0119513	sp|Q10JL1|COBL5_ORYSJ COBRA-like protein 5 OS=Oryza sativa subsp. japonica OX=39947 GN=BC1 PE=2 SV=1	AT4G16120	COBRA-like protein-7 precursor|ATSEB1,COBL7,SEB1		Downregulated
Potra2n4c8834	268.568	-1.67999	0.0306323	sp|Q3E912|DMP10_ARATH Protein DMP10 OS=Arabidopsis thaliana OX=3702 GN=DMP10 PE=2 SV=1	AT4G18425	transmembrane protein, putative (DUF679)		Downregulated
Potra2n1c1406	628.972	-1.00083	0.000302924	sp|A0QZE3|Y3995_MYCS2 Putative hydrolase MSMEG_3995/MSMEI_3903 OS=Mycolicibacterium smegmatis (strain ATCC 700084 / mc(2)155) OX=246196 GN=MSMEG_3995 PE=1 SV=1	AT4G20070	allantoate amidohydrolase|AAH,ATAAH		Downregulated
Potra2n3c7341	189.817	-1.18353	0.00276101	sp|B8NI22|IMQE_ASPFN 2-oxoglutarate-dependent dioxygenase imqE OS=Aspergillus flavus (strain ATCC 200026 / FGSC A1120 / NRRL 3357 / JCM 12722 / SRRC 167) OX=332952 GN=imqE PE=2 SV=1	AT4G23340	2-oxoglutarate (2OG) and Fe(II)-dependent oxygenase superfamily protein		Downregulated
Potra2n1c831	993.458	-1.21359	0.000411827	sp|Q12554|PGLRC_ASPNG Probable endopolygalacturonase C OS=Aspergillus niger OX=5061 GN=pgaC PE=3 SV=1	AT4G23500	Pectin lyase-like superfamily protein		Downregulated
Potra2n1c3955	223.565	-1.4759	0.0277977	sp|Q9DE67|LUM_COTJA Lumican OS=Coturnix japonica OX=93934 GN=LUM PE=2 SV=1	AT4G26540	Leucine-rich repeat receptor-like protein kinase family protein		Downregulated
Potra2n18c32873	2736.77	-1.59713	0.0420808	sp|Q52008|LSDX3_SPHPI Lignostilbene-alpha,beta-dioxygenase isozyme III OS=Sphingomonas paucimobilis OX=13689 GN=lsdB PE=1 SV=1	AT4G32810	carotenoid cleavage dioxygenase 8		Downregulated
Potra2n6c13323	3632.54	-1.41803	0.0109593	sp|Q7XIZ1|GRXC9_ORYSJ Glutaredoxin-C9 OS=Oryza sativa subsp. japonica OX=39947 GN=GRXC9 PE=3 SV=1	AT4G33040	Thioredoxin superfamily protein		Downregulated
Potra2n4c9643	622.27	-1.36562	0.0219606	sp|Q4PD66|CCPR2_USTMA Putative heme-binding peroxidase OS=Ustilago maydis (strain 521 / FGSC 9021) OX=237631 GN=CCP2 PE=3 SV=1	AT4G33420	Peroxidase superfamily protein		Downregulated
Potra2n19c34461	71.4169	-1.20408	0.0171116	sp|Q42593|APXT_ARATH L-ascorbate peroxidase T, chloroplastic OS=Arabidopsis thaliana OX=3702 GN=APXT PE=2 SV=2	AT4G33420	Peroxidase superfamily protein		Downregulated
Potra2n19c34464	537.167	-1.00462	0.0138371	sp|Q7XJ02|APX7_ORYSJ Probable L-ascorbate peroxidase 7, chloroplastic OS=Oryza sativa subsp. japonica OX=39947 GN=APX7 PE=2 SV=1	AT4G33420	Peroxidase superfamily protein		Downregulated
Potra2n7c16449	850.407	-1.02005	0.00985204	sp|W7N6M8|FUS9_GIBM7 Methyltransferase FUS9 OS=Gibberella moniliformis (strain M3125 / FGSC 7600) OX=334819 GN=FUS9 PE=3 SV=1	AT4G36470	S-adenosyl-L-methionine-dependent methyltransferases superfamily protein		Downregulated
Potra2n4c9589	194.166	1.22735	0.00371054	sp|Q2V2V3|PLAT3_ARATH PLAT domain-containing protein 3 OS=Arabidopsis thaliana OX=3702 GN=PLAT3 PE=4 SV=1	AT4G39730	Lipase/lipooxygenase, PLAT/LH2 family protein		Upregulated
Potra2n6c14438	159.791	-1.07082	0.0167273	sp|O08353|ILVB_METAO Probable acetolactate synthase large subunit OS=Methanococcus aeolicus OX=42879 GN=ilvB PE=3 SV=1	AT5G01320	Thiamine pyrophosphate dependent pyruvate decarboxylase family protein		Downregulated
Potra2n6c14603	109.63	-1.27338	0.048573	sp|Q9LZ60|SMR3_ARATH Cyclin-dependent protein kinase inhibitor SMR3 OS=Arabidopsis thaliana OX=3702 GN=SMR3 PE=1 SV=1	AT5G02420	cyclin-dependent kinase inhibitor SMR3-like protein		Downregulated
Potra2n16c30119	127.586	-1.38391	0.0259636	sp|Q67ZW1|HIP27_ARATH Heavy metal-associated isoprenylated plant protein 27 OS=Arabidopsis thaliana OX=3702 GN=HIPP27 PE=1 SV=1	AT5G03380	Heavy metal transport/detoxification superfamily protein		Downregulated
Potra2n819s36800	61.4483	-1.52149	0.00976611	sp|Q39117|TGT2_ARATH Trihelix transcription factor GT-2 OS=Arabidopsis thaliana OX=3702 GN=GT-2 PE=2 SV=1	AT5G03680	Duplicated homeodomain-like superfamily protein|PTL		Downregulated
Potra2n8c16935	49.2216	-1.5677	0.0266516	sp|Q9XIP2|OTU6_ARATH OVARIAN TUMOR DOMAIN-containing deubiquitinating enzyme 6 OS=Arabidopsis thaliana OX=3702 GN=OTU6 PE=1 SV=2	AT5G04250	Cysteine proteinases superfamily protein		Downregulated
Potra2n6c13596	896.957	-1.23156	0.0061822	sp|Q325C0|AES_SHIBS Acetyl esterase OS=Shigella boydii serotype 4 (strain Sb227) OX=300268 GN=aes PE=3 SV=1	AT5G06570	alpha/beta-Hydrolases superfamily protein		Downregulated
Potra2n154s34742	129.883	-1.74401	0.0123157		AT5G12950	proline-tRNA ligase (DUF1680)		Downregulated
Potra2n3c6614	304.881	-1.65131	0.0259636		AT5G12950	proline-tRNA ligase (DUF1680)		Downregulated
Potra2n3c6613	101.532	-1.51377	0.0230882		AT5G12950	proline-tRNA ligase (DUF1680)		Downregulated
Potra2n10c20512	87.0885	-1.67457	0.0227903	sp|P33916|YEJF_ECOLI Uncharacterized ABC transporter ATP-binding protein YejF OS=Escherichia coli (strain K12) OX=83333 GN=yejF PE=1 SV=1	AT5G13580	ABC-2 type transporter family protein		Downregulated
Potra2n3c6889	456.299	-1.2486	0.0325809	sp|Q3Z326|FABH_SHISS 3-oxoacyl-[acyl-carrier-protein] synthase 3 OS=Shigella sonnei (strain Ss046) OX=300269 GN=fabH PE=3 SV=1	AT5G13930	Chalcone and stilbene synthase family protein|ATCHS,CHS,TT4		Downregulated
Potra2n10c22155	168.07	-1.12119	0.0401399		AT5G18980	ARM repeat superfamily protein		Downregulated
Potra2n11c22391	338.016	-1.01225	0.00276101	sp|Q9SX98|LHTL8_ARATH Lysine histidine transporter-like 8 OS=Arabidopsis thaliana OX=3702 GN=AATL1 PE=1 SV=1	AT5G23810	amino acid permease 7|AAP7		Downregulated
Potra2n4c9135	134.211	-1.15117	0.011054	sp|Q9FID9|Y5389_ARATH Probable receptor-like protein kinase At5g38990 OS=Arabidopsis thaliana OX=3702 GN=At5g38990 PE=2 SV=1	AT5G24010	Protein kinase superfamily protein		Downregulated
Potra2n1c2838	108.21	-1.30552	0.0460049	sp|Q9LIS1|CR26L_ARATH Protein ECERIFERUM 26-like OS=Arabidopsis thaliana OX=3702 GN=CER26L PE=2 SV=1	AT5G41040	HXXXD-type acyl-transferase family protein		Downregulated
Potra2n1c796	2371.26	1.24968	4.75775e-08	sp|Q55702|Y229_SYNY3 Uncharacterized oxidoreductase slr0229 OS=Synechocystis sp. (strain PCC 6803 / Kazusa) OX=1111708 GN=slr0229 PE=3 SV=1	AT5G41670	6-phosphogluconate dehydrogenase family protein		Upregulated
Potra2n3c6981	1902.46	-1.38613	0.0153375	sp|P0DKL1|SAU50_HELAN Auxin-responsive protein SAUR50 OS=Helianthus annuus OX=4232 PE=3 SV=1	AT5G50760	SAUR-like auxin-responsive protein family		Downregulated
Potra2n3c6940	954.493	-1.17949	0.000150766		AT5G51920	Pyridoxal phosphate (PLP)-dependent transferases superfamily protein		Downregulated
Potra2n3c7330	83.6684	-1.28233	0.039983	sp|Q9SRE5|Y1666_ARATH Uncharacterized protein At1g76660 OS=Arabidopsis thaliana OX=3702 GN=At1g76660 PE=2 SV=1	AT5G52430	hydroxyproline-rich glycoprotein family protein		Downregulated
Potra2n19c33300	5596.51	-1.21038	0.0093657	sp|Q2QXC6|WNK9_ORYSJ Probable serine/threonine-protein kinase WNK9 OS=Oryza sativa subsp. japonica OX=39947 GN=WNK9 PE=2 SV=1	AT5G58350	with no lysine (K) kinase 4|WNK4,ZIK2		Downregulated
Potra2n15c28122	1191.45	-1.04972	0.0423696	sp|Q8GX86|PME21_ARATH Probable pectinesterase/pectinesterase inhibitor 21 OS=Arabidopsis thaliana OX=3702 GN=PME21 PE=2 SV=2	AT5G62350	Plant invertase/pectin methylesterase inhibitor superfamily protein		Downregulated
Potra2n15c28518	506.611	-1.51354	0.0240177		AT5G62960	UDP-N-acetylglucosamine-N-acetylmuramyl-pyrophosphoryl-undecaprenol N-acetylglucosamine protein		Downregulated
Potra2n125s34633	50.2274	-1.22199	0.00925327		AT5G64850	sorbin/SH3 domain protein		Downregulated
Potra2n7c16179	57.1032	-1.80737	0.0437627	sp|O78501|YCF36_GUITH Uncharacterized protein ycf36 OS=Guillardia theta OX=55529 GN=ycf36 PE=3 SV=1	AT5G67370	DUF1230 family protein (DUF1230)		Downregulated
Potra2n10c20603	283.517	-2.40644	0.0311796		AT2G16050	Cysteine/Histidine-rich C1 domain family protein	PHD	Downregulated

## Sheet: S1D_12h
Gene_Id	Base_Mean	Log2_Fold_Change	False_Discovery_Rate	UniProt_Description	Best Arabidospsis hit	TAIR_description	TF family	Level_after_nitrate_treatment
Potra2n738s36638	5.96644	5.8236	0.0342455	sp|Q5VNW5|IMCL2_ORYSJ Probable isoprenylcysteine alpha-carbonyl methylesterase ICMEL2 OS=Oryza sativa subsp. japonica OX=39947 GN=IMCEL2 PE=2 SV=1	AT5G15860	prenylcysteine methylesterase|ATPCME,PCME	No	Upregulated
Potra2n7c15738	16.7035	2.93436	0.0376196				No	Upregulated

## Sheet: S1E_TimeBin
Gene_Id	Level_after_nitrate_treatment	Time_Bin
Potra2n738s36638	Upregulated	12h
Potra2n7c15738	Upregulated	12h
Potra2n11c23391	Upregulated	2h
Potra2n1c2895	Upregulated	2h
Potra2n1c679	Upregulated	2h
Potra2n8c16718	Upregulated	2h
Potra2n3c7503	Upregulated	2h
Potra2n1c3844	Upregulated	2h
Potra2n12c24465	Upregulated	2h
Potra2n16c30193	Upregulated	2h
Potra2n18c32440	Upregulated	2h
Potra2n4c10024	Upregulated	2h
Potra2n1c685	Upregulated	2h
Potra2n15c28440	Upregulated	2h
Potra2n6c14860	Upregulated	2h
Potra2n4c8639	Upregulated	2h
Potra2n14c27340	Upregulated	2h
Potra2n6c13502	Upregulated	2h
Potra2n10c20792	Upregulated	2h
Potra2n15c28859	Upregulated	2h
Potra2n1c723	Upregulated	2h
Potra2n1c366	Upregulated	2h
Potra2n1c3303	Upregulated	2h
Potra2n8c17602	Upregulated	2h
Potra2n650s36268	Upregulated	2h
Potra2n13c25668	Upregulated	2h
Potra2n3c7064	Upregulated	2h
Potra2n17c31519	Upregulated	2h
Potra2n10c21293	Upregulated	2h
Potra2n10c21610	Upregulated	2h
Potra2n12c23757	Upregulated	2h
Potra2n4c10074	Upregulated	2h
Potra2n5c12431	Upregulated	2h
Potra2n15c27976	Upregulated	2h
Potra2n2c4551	Upregulated	2h
Potra2n12c23912	Upregulated	2h
Potra2n2c5243	Upregulated	2h
Potra2n8c18221	Upregulated	2h
Potra2n2c6001	Upregulated	2h
Potra2n2c4598	Upregulated	2h
Potra2n14c27135	Upregulated	2h
Potra2n5c11517	Upregulated	2h
Potra2n5c10502	Upregulated	2h
Potra2n15c28643	Upregulated	2h
Potra2n9c19920	Upregulated	2h
Potra2n4c8622	Upregulated	2h
Potra2n14c27393	Upregulated	2h
Potra2n7c15630	Upregulated	2h
Potra2n7c16256	Upregulated	2h
Potra2n7c15824	Upregulated	2h
Potra2n14c27478	Upregulated	2h
Potra2n1c2120	Upregulated	2h
Potra2n6c15083	Upregulated	2h
Potra2n3c7270	Upregulated	2h
Potra2n3c6974	Upregulated	2h
Potra2n9c19486	Upregulated	2h
Potra2n17c31530	Upregulated	2h
Potra2n2c4565	Upregulated	2h
Potra2n8c18105	Upregulated	2h
Potra2n1c1486	Upregulated	2h
Potra2n700s36526	Upregulated	2h
Potra2n9c19654	Upregulated	2h
Potra2n5c11357	Upregulated	2h
Potra2n5c11037	Upregulated	2h
Potra2n5c11320	Upregulated	2h
Potra2n19c33457	Upregulated	2h
Potra2n1c496	Upregulated	2h
Potra2n18c32125	Upregulated	2h
Potra2n1c1053	Upregulated	2h
Potra2n15c28480	Upregulated	2h
Potra2n9c19330	Upregulated	2h
Potra2n1c2361	Upregulated	2h
Potra2n7c15464	Upregulated	2h
Potra2n4c9465	Upregulated	2h
Potra2n5c11625	Upregulated	2h
Potra2n4c9349	Upregulated	2h
Potra2n4c10189	Upregulated	2h
Potra2n1c494	Upregulated	2h
Potra2n1c322	Upregulated	2h
Potra2n1c796	Upregulated	2h
Potra2n6c13008	Upregulated	2h
Potra2n1c2237	Upregulated	2h
Potra2n1c3307	Upregulated	2h
Potra2n1c318	Upregulated	2h
Potra2n17c31885	Upregulated	2h
Potra2n5c11091	Upregulated	2h
Potra2n9c19481	Upregulated	2h
Potra2n9c19145	Upregulated	2h
Potra2n1c1954	Upregulated	2h
Potra2n3c6882	Upregulated	2h
Potra2n8c17549	Upregulated	2h
Potra2n17c30668	Upregulated	2h
Potra2n1c831	Upregulated	2h
Potra2n4c8518	Upregulated	2h
Potra2n426s35633	Upregulated	2h
Potra2n1c3167	Upregulated	2h
Potra2n2c5397	Upregulated	2h
Potra2n199s34916	Upregulated	2h
Potra2n1c827	Upregulated	2h
Potra2n4c9742	Upregulated	2h
Potra2n7c15864	Upregulated	2h
Potra2n2c4957	Upregulated	2h
Potra2n6c12957	Upregulated	2h
Potra2n6c14477	Upregulated	2h
Potra2n14c26937	Upregulated	2h
Potra2n10c21240	Upregulated	2h
Potra2n5c12621	Upregulated	2h
Potra2n14c27409	Upregulated	2h
Potra2n1c3259	Upregulated	2h
Potra2n14c27006	Upregulated	2h
Potra2n2c6137	Upregulated	2h
Potra2n9c18689	Upregulated	2h
Potra2n18c32565	Upregulated	2h
Potra2n15c28441	Upregulated	2h
Potra2n10c20512	Upregulated	4h
Potra2n12c23981	Upregulated	4h
Potra2n1c3132	Upregulated	4h
Potra2n1c94	Upregulated	4h
Potra2n5c12559	Upregulated	4h
Potra2n6c13197	Upregulated	4h
Potra2n6c14333	Upregulated	4h
Potra2n7c15783	Upregulated	4h
Potra2n11c23300	Upregulated	4h
Potra2n2c5754	Upregulated	4h
Potra2n15c28463	Upregulated	4h
Potra2n3c7330	Upregulated	4h
Potra2n5c12114	Upregulated	4h
Potra2n5c11618	Upregulated	4h
Potra2n9c19157	Upregulated	4h
Potra2n2c5519	Upregulated	4h
Potra2n1c2761	Upregulated	4h
Potra2n5c12694	Upregulated	4h
Potra2n3c7734	Upregulated	4h
Potra2n11c22574	Upregulated	4h
Potra2n5c11919	Upregulated	4h
Potra2n7c16259	Upregulated	4h
Potra2n5c12343	Upregulated	4h
Potra2n8c17135	Upregulated	4h
Potra2n13c25215	Upregulated	4h
Potra2n6c13170	Upregulated	4h
Potra2n4c9412	Upregulated	4h
Potra2n6c14095	Upregulated	4h
Potra2n2c4882	Upregulated	4h
Potra2n8c18351	Upregulated	4h
Potra2n8c17154	Upregulated	4h
Potra2n5c12551	Upregulated	4h
Potra2n13c26189	Upregulated	4h
Potra2n10c22118	Upregulated	4h
Potra2n10c22127	Upregulated	4h
Potra2n3c8154	Upregulated	4h
Potra2n4c8905	Upregulated	4h
Potra2n17c31404	Upregulated	4h
Potra2n16c29670	Upregulated	4h
Potra2n2c5606	Upregulated	4h
Potra2n4c10071	Upregulated	4h
Potra2n18c33172	Upregulated	4h
Potra2n14c26520	Upregulated	4h
Potra2n19c34382	Upregulated	4h
Potra2n8c18536	Upregulated	4h
Potra2n633s36227	Upregulated	4h
Potra2n13c25212	Upregulated	4h
Potra2n8c18476	Upregulated	4h
Potra2n266s35156	Upregulated	4h
Potra2n8c17703	Upregulated	4h
Potra2n16c29697	Upregulated	4h
Potra2n4c9079	Upregulated	4h
Potra2n16c29840	Upregulated	4h
Potra2n18c33092	Upregulated	4h
Potra2n9c19376	Upregulated	4h
Potra2n13c25637	Upregulated	4h
Potra2n11c23325	Upregulated	4h
Potra2n5c11916	Upregulated	4h
Potra2n15c28548	Upregulated	4h
Potra2n17c31107	Upregulated	4h
Potra2n15c28464	Upregulated	4h
Potra2n1c2934	Upregulated	4h
Potra2n13c26232	Upregulated	4h
Potra2n15c28419	Upregulated	4h
Potra2n14c27101	Upregulated	4h
Potra2n2c5831	Upregulated	4h
Potra2n1c721	Upregulated	4h
Potra2n14c26808	Upregulated	4h
Potra2n16c29633	Upregulated	4h
Potra2n3c6530	Upregulated	4h
Potra2n4c8834	Upregulated	4h
Potra2n6c13785	Upregulated	4h
Potra2n8c18085	Upregulated	4h
Potra2n1c1684	Upregulated	4h
Potra2n18c31948	Upregulated	4h
Potra2n8c16846	Upregulated	4h
Potra2n10c22148	Upregulated	4h
Potra2n15c28437	Upregulated	4h
Potra2n154s34742	Upregulated	4h
Potra2n2c5120	Upregulated	4h
Potra2n4c9696	Upregulated	4h
Potra2n2c5232	Upregulated	4h
Potra2n4c9619	Upregulated	4h
Potra2n19c33920	Upregulated	4h
Potra2n16c30557	Upregulated	4h
Potra2n4c9102	Upregulated	4h
Potra2n3c6674	Upregulated	4h
Potra2n2c6238	Upregulated	4h
Potra2n6c14421	Upregulated	4h
Potra2n8c17414	Upregulated	4h
Potra2n3c7136	Upregulated	4h
Potra2n10c20785	Upregulated	4h
Potra2n14c26806	Upregulated	4h
Potra2n1c2007	Upregulated	4h
Potra2n14c26522	Upregulated	4h
Potra2n10c20733	Upregulated	4h
Potra2n268s35171	Upregulated	4h
Potra2n9c18854	Upregulated	4h
Potra2n2c5045	Upregulated	4h
Potra2n17c31393	Upregulated	4h
Potra2n5c10936	Upregulated	4h
Potra2n13c25134	Upregulated	4h
Potra2n14c26589	Upregulated	4h
Potra2n5c11696	Upregulated	4h
Potra2n10c20603	Upregulated	4h
Potra2n799s36770	Upregulated	4h
Potra2n18c32188	Upregulated	4h
Potra2n15c28127	Upregulated	4h
Potra2n4c10459	Upregulated	4h
Potra2n3c8346	Upregulated	4h
Potra2n18c32199	Upregulated	4h
Potra2n2c4494	Upregulated	4h
Potra2n8c17746	Upregulated	4h
Potra2n1c1073	Upregulated	4h
Potra2n8c16935	Upregulated	4h
Potra2n5c11746	Upregulated	4h
Potra2n6c15267	Upregulated	4h
Potra2n18c32976	Upregulated	4h
Potra2n1c3583	Upregulated	4h
Potra2n17c31812	Upregulated	4h
Potra2n6c13118	Upregulated	4h
Potra2n16c29905	Upregulated	4h
Potra2n9c19054	Upregulated	4h
Potra2n1c1835	Upregulated	4h
Potra2n6c14360	Upregulated	4h
Potra2n9c19482	Upregulated	4h
Potra2n9c19332	Upregulated	4h
Potra2n15c29121	Upregulated	4h
Potra2n6c14482	Upregulated	4h
Potra2n6c14579	Upregulated	4h
Potra2n3c7135	Upregulated	4h
Potra2n16c30330	Upregulated	4h
Potra2n16c30512	Upregulated	4h
Potra2n1c2826	Upregulated	4h
Potra2n10c21465	Upregulated	4h
Potra2n9c18949	Upregulated	4h
Potra2n7c16179	Upregulated	4h
Potra2n2c5915	Upregulated	4h
Potra2n9c18813	Upregulated	4h
Potra2n1c353	Upregulated	4h
Potra2n15c28935	Upregulated	4h
Potra2n19c34199	Upregulated	4h
Potra2n6c14364	Upregulated	4h
Potra2n16c30280	Upregulated	4h
Potra2n16c30327	Upregulated	4h
Potra2n16c30279	Upregulated	4h
Potra2n4c8729	Upregulated	4h
Potra2n1c940	Upregulated	4h
Potra2n1c1591	Upregulated	4h
Potra2n1c478	Upregulated	4h
Potra2n8c18414	Upregulated	4h
Potra2n2c5950	Upregulated	4h
Potra2n17c30578	Upregulated	4h
Potra2n17c30644	Upregulated	4h
Potra2n13c25981	Upregulated	4h
Potra2n7c16596	Upregulated	4h
Potra2n1c3211	Upregulated	4h
Potra2n246s35110	Upregulated	4h
Potra2n1c1476	Upregulated	4h
Potra2n4c9590	Upregulated	4h
Potra2n1c1360	Upregulated	4h
Potra2n2c4406	Upregulated	4h
Potra2n5c12509	Upregulated	4h
Potra2n9c18681	Upregulated	4h
Potra2n14c26737	Upregulated	4h
Potra2n6c14819	Upregulated	4h
Potra2n11c23466	Upregulated	4h
Potra2n6c14433	Upregulated	4h
Potra2n3c7551	Upregulated	4h
Potra2n8c17168	Upregulated	4h
Potra2n10c21938	Upregulated	4h
Potra2n1c1268	Upregulated	4h
Potra2n7c16327	Upregulated	4h
Potra2n8c17748	Upregulated	4h
Potra2n6c14534	Upregulated	4h
Potra2n7c16104	Upregulated	4h
Potra2n6c14312	Upregulated	4h
Potra2n18c32068	Upregulated	4h
Potra2n3c7124	Upregulated	4h
Potra2n6c14752	Upregulated	4h
Potra2n4c9690	Upregulated	4h
Potra2n747s36676	Upregulated	4h
Potra2n2c6109	Upregulated	4h
Potra2n1c2317	Upregulated	4h
Potra2n15c28518	Upregulated	4h
Potra2n8c18018	Upregulated	4h
Potra2n17c31708	Upregulated	4h
Potra2n3c8098	Upregulated	4h
Potra2n203s34950	Upregulated	4h
Potra2n8c18092	Upregulated	4h
Potra2n1c3594	Upregulated	4h
Potra2n17c30810	Upregulated	4h
Potra2n384s35498	Upregulated	4h
Potra2n9c19172	Upregulated	4h
Potra2n19c33458	Upregulated	4h
Potra2n16c30399	Upregulated	4h
Potra2n13c25129	Upregulated	4h
Potra2n15c28766	Upregulated	4h
Potra2n2c5671	Upregulated	4h
Potra2n2c4681	Upregulated	4h
Potra2n8c17513	Upregulated	4h
Potra2n7c16146	Upregulated	4h
Potra2n12c24414	Upregulated	4h
Potra2n17c31507	Upregulated	4h
Potra2n8c16964	Upregulated	4h
Potra2n13c25884	Upregulated	4h
Potra2n16c29729	Upregulated	4h
Potra2n3c8123	Upregulated	4h
Potra2n4c10054	Upregulated	4h
Potra2n2c4050	Upregulated	4h
Potra2n1c1022	Upregulated	4h
Potra2n18c32121	Upregulated	4h
Potra2n11c22478	Upregulated	4h
Potra2n1c3965	Upregulated	4h
Potra2n8c16931	Upregulated	4h
Potra2n81s34499	Upregulated	4h
Potra2n9c20067	Upregulated	4h
Potra2n5c12529	Upregulated	4h
Potra2n2c6308	Upregulated	4h
Potra2n14c27704	Upregulated	4h
Potra2n4c9589	Upregulated	4h
Potra2n6c14936	Upregulated	4h
Potra2n16c29552	Upregulated	4h
Potra2n9c19089	Upregulated	4h
Potra2n1c3374	Upregulated	4h
Potra2n19c33300	Upregulated	4h
Potra2n8c18353	Upregulated	4h
Potra2n16c29601	Upregulated	4h
Potra2n3c7504	Upregulated	4h
Potra2n18c32115	Upregulated	4h
Potra2n14c27161	Upregulated	4h
Potra2n127s34661	Upregulated	4h
Potra2n1408s37052	Upregulated	4h
Potra2n1490s37101	Upregulated	4h
Potra2n1c1724	Upregulated	8h
Potra2n2c4816	Upregulated	8h
Potra2n16c29392	Downregulated	2h
Potra2n12c23799	Downregulated	2h
Potra2n2c4985	Downregulated	2h
Potra2n10c20757	Downregulated	2h
Potra2n8c18536	Downregulated	2h
Potra2n2c5524	Downregulated	2h
Potra2n16c29536	Downregulated	2h
Potra2n15c29046	Downregulated	2h
Potra2n11c22562	Downregulated	2h
Potra2n7c15499	Downregulated	2h
Potra2n6c14263	Downregulated	2h
Potra2n7c16541	Downregulated	2h
Potra2n17c31393	Downregulated	2h
Potra2n1c3617	Downregulated	2h
Potra2n10c20416	Downregulated	2h
Potra2n14c27467	Downregulated	2h
Potra2n6c15267	Downregulated	2h
Potra2n4c8686	Downregulated	2h
Potra2n5c10864	Downregulated	2h
Potra2n2c5098	Downregulated	2h
Potra2n10c21465	Downregulated	2h
Potra2n8c17773	Downregulated	2h
Potra2n9c18949	Downregulated	2h
Potra2n17c30939	Downregulated	2h
Potra2n10c20373	Downregulated	2h
Potra2n7c16596	Downregulated	2h
Potra2n2c6179	Downregulated	2h
Potra2n12c24072	Downregulated	2h
Potra2n15c28493	Downregulated	2h
Potra2n14c26487	Downregulated	2h
Potra2n13c25021	Downregulated	4h
Potra2n3c6472	Downregulated	4h
Potra2n3c6894	Downregulated	4h
Potra2n4c9506	Downregulated	4h
Potra2n6c13626	Downregulated	4h
Potra2n6c13940	Downregulated	4h
Potra2n9c20009	Downregulated	4h
Potra2n9c19489	Downregulated	4h
Potra2n8c16766	Downregulated	4h
Potra2n14c27119	Downregulated	4h
Potra2n9c19357	Downregulated	4h
Potra2n2c5687	Downregulated	4h
Potra2n7c16624	Downregulated	4h
Potra2n5c11223	Downregulated	4h
Potra2n14c27117	Downregulated	4h
Potra2n11c23397	Downregulated	4h
Potra2n7c16290	Downregulated	4h
Potra2n14c27570	Downregulated	4h
Potra2n19c33344	Downregulated	4h
Potra2n4c8489	Downregulated	4h
Potra2n4c9507	Downregulated	4h
Potra2n14c26346	Downregulated	4h
Potra2n2c5705	Downregulated	4h
Potra2n8c17679	Downregulated	4h
Potra2n19c33346	Downregulated	4h
Potra2n1c922	Downregulated	4h
Potra2n14c26485	Downregulated	4h
Potra2n8c17636	Downregulated	4h
Potra2n15c29105	Downregulated	4h
Potra2n420s35610	Downregulated	4h
Potra2n5c11771	Downregulated	4h
Potra2n5c12138	Downregulated	4h
Potra2n11c23195	Downregulated	4h
Potra2n8c18047	Downregulated	4h
Potra2n12c23847	Downregulated	4h
Potra2n10c21184	Downregulated	4h
Potra2n680s36424	Downregulated	4h
Potra2n4c9841	Downregulated	4h
Potra2n3c7785	Downregulated	4h
Potra2n1c2150	Downregulated	4h
Potra2n7c15924	Downregulated	4h
Potra2n6c15061	Downregulated	4h
Potra2n9c19066	Downregulated	4h
Potra2n19c34121	Downregulated	4h
Potra2n5c11114	Downregulated	4h
Potra2n10c21724	Downregulated	4h
Potra2n1c2551	Downregulated	4h
Potra2n3c7593	Downregulated	4h
Potra2n16c29236	Downregulated	4h
Potra2n2c5022	Downregulated	4h
Potra2n16c30328	Downregulated	4h
Potra2n8c18152	Downregulated	4h
Potra2n4c8731	Downregulated	4h
Potra2n8c16727	Downregulated	4h
Potra2n3c8258	Downregulated	4h
Potra2n3c7089	Downregulated	4h
Potra2n7c16357	Downregulated	4h
Potra2n4c9502	Downregulated	4h
Potra2n681s36450	Downregulated	4h
Potra2n2c5528	Downregulated	4h
Potra2n6c15012	Downregulated	4h
Potra2n13c25019	Downregulated	4h
Potra2n16c29649	Downregulated	4h
Potra2n9c19776	Downregulated	4h
Potra2n1c463	Downregulated	4h
Potra2n81s34501	Downregulated	4h
Potra2n6c13814	Downregulated	4h
Potra2n1c3762	Downregulated	4h
Potra2n1c3485	Downregulated	4h
Potra2n5c10819	Downregulated	4h
Potra2n11c23103	Downregulated	4h
Potra2n6c15114	Downregulated	4h
Potra2n18c32725	Downregulated	4h
Potra2n3c7161	Downregulated	4h
Potra2n15c29208	Downregulated	4h
Potra2n19c34342	Downregulated	4h
Potra2n10c21764	Downregulated	4h
Potra2n17c31035	Downregulated	4h
Potra2n10c20389	Downregulated	4h
Potra2n19c34115	Downregulated	4h
Potra2n4c10260	Downregulated	4h
Potra2n5c10985	Downregulated	4h
Potra2n14c27463	Downregulated	4h
Potra2n6c14432	Downregulated	4h
Potra2n12c24399	Downregulated	4h
Potra2n699s36524	Downregulated	4h
Potra2n9c19656	Downregulated	4h
Potra2n12c24798	Downregulated	4h
Potra2n12c24301	Downregulated	4h
Potra2n17c30664	Downregulated	4h
Potra2n14c26583	Downregulated	4h
Potra2n10c22278	Downregulated	4h
Potra2n10c20512	Downregulated	8h
Potra2n1c3716	Downregulated	8h
Potra2n1c3955	Downregulated	8h
Potra2n4c10281	Downregulated	8h
Potra2n6c13197	Downregulated	8h
Potra2n14c27366	Downregulated	8h
Potra2n3c7330	Downregulated	8h
Potra2n11c22566	Downregulated	8h
Potra2n3c6760	Downregulated	8h
Potra2n5c11136	Downregulated	8h
Potra2n3c6694	Downregulated	8h
Potra2n4c9733	Downregulated	8h
Potra2n4c9643	Downregulated	8h
Potra2n8c17135	Downregulated	8h
Potra2n17c31070	Downregulated	8h
Potra2n14c26606	Downregulated	8h
Potra2n6c14603	Downregulated	8h
Potra2n5c12551	Downregulated	8h
Potra2n10c22127	Downregulated	8h
Potra2n4c8905	Downregulated	8h
Potra2n3c6889	Downregulated	8h
Potra2n18c32873	Downregulated	8h
Potra2n19c33630	Downregulated	8h
Potra2n6c14438	Downregulated	8h
Potra2n4c9135	Downregulated	8h
Potra2n1c2577	Downregulated	8h
Potra2n1c2838	Downregulated	8h
Potra2n4c8834	Downregulated	8h
Potra2n15c28995	Downregulated	8h
Potra2n377s35475	Downregulated	8h
Potra2n154s34742	Downregulated	8h
Potra2n9c19485	Downregulated	8h
Potra2n6c15063	Downregulated	8h
Potra2n13c25348	Downregulated	8h
Potra2n1c1212	Downregulated	8h
Potra2n3c6613	Downregulated	8h
Potra2n4c8435	Downregulated	8h
Potra2n5c11696	Downregulated	8h
Potra2n10c20603	Downregulated	8h
Potra2n8c17940	Downregulated	8h
Potra2n3c6614	Downregulated	8h
Potra2n2c6134	Downregulated	8h
Potra2n7c16449	Downregulated	8h
Potra2n3c6940	Downregulated	8h
Potra2n13c25099	Downregulated	8h
Potra2n8c16935	Downregulated	8h
Potra2n1c889	Downregulated	8h
Potra2n819s36800	Downregulated	8h
Potra2n14c26863	Downregulated	8h
Potra2n10c22155	Downregulated	8h
Potra2n10c22200	Downregulated	8h
Potra2n7c16179	Downregulated	8h
Potra2n5c12474	Downregulated	8h
Potra2n16c30119	Downregulated	8h
Potra2n7c16489	Downregulated	8h
Potra2n1c1591	Downregulated	8h
Potra2n3c7341	Downregulated	8h
Potra2n1c478	Downregulated	8h
Potra2n1c3711	Downregulated	8h
Potra2n4c10098	Downregulated	8h
Potra2n246s35110	Downregulated	8h
Potra2n6c14908	Downregulated	8h
Potra2n125s34633	Downregulated	8h
Potra2n4c10189	Downregulated	8h
Potra2n495s35812	Downregulated	8h
Potra2n5c10888	Downregulated	8h
Potra2n8c17168	Downregulated	8h
Potra2n11c22450	Downregulated	8h
Potra2n4c9690	Downregulated	8h
Potra2n15c28518	Downregulated	8h
Potra2n11c22391	Downregulated	8h
Potra2n17c31708	Downregulated	8h
Potra2n1c831	Downregulated	8h
Potra2n10c20602	Downregulated	8h
Potra2n3c8098	Downregulated	8h
Potra2n19c33806	Downregulated	8h
Potra2n1c1484	Downregulated	8h
Potra2n5c10826	Downregulated	8h
Potra2n6c13596	Downregulated	8h
Potra2n2c4050	Downregulated	8h
Potra2n1c1406	Downregulated	8h
Potra2n19c34464	Downregulated	8h
Potra2n19c34461	Downregulated	8h
Potra2n12c24315	Downregulated	8h
Potra2n8c18075	Downregulated	8h
Potra2n2c5137	Downregulated	8h
Potra2n4c9043	Downregulated	8h
Potra2n19c33300	Downregulated	8h
Potra2n15c28122	Downregulated	8h
Potra2n3c6981	Downregulated	8h
Potra2n6c13323	Downregulated	8h

## Sheet: S1F_Whole_Network
Gene_Id	TF family	Degree	Betweenness	Page rank	Cluster
Potra2n7c16584	AP2	304	0.000162173	8.14005e-05	Cluster2
Potra2n3c7135	AP2	286	0.000210366	7.44344e-05	Cluster6
Potra2n8c16727	AP2	276	0.000151922	3.54665e-05	Cluster3
Potra2n5c11497	AP2	204	6.01884e-05	2.93706e-05	Cluster8
Potra2n6c13849	AP2	193	0.000181405	5.54549e-05	Cluster2
Potra2n2c5371	AP2	185	0.000193191	4.15935e-05	Cluster2
Potra2n5c11582	AP2	173	1.04961e-05	7.63877e-05	Cluster3
Potra2n18c32470	AP2	150	0.000143571	4.30903e-05	Cluster2
Potra2n6c14967	AP2	129	6.56261e-05	1.80383e-05	Cluster6
Potra2n197s34858	AP2	128	1.11648e-05	2.29096e-05	Cluster1
Potra2n6c14147	AP2	94	7.45712e-05	2.5753e-05	Cluster7
Potra2n3c6804	AP2	87	1.68333e-05	1.22763e-05	Cluster8
Potra2n1c1493	AP2	84	7.54019e-05	2.07898e-05	Cluster1
Potra2n16c29748	AP2	82	5.46734e-05	2.3741e-05	Cluster5
Potra2n1c335	AP2	77	3.84653e-05	1.44196e-05	Cluster1
Potra2n10c20485	AP2	76	2.36663e-05	2.0598e-05	Cluster6
Potra2n14c26391	AP2	61	3.18665e-05	2.07556e-05	Cluster2
Potra2n16c30028	AP2	55	3.75881e-05	3.23759e-05	Cluster5
Potra2n8c17012	AP2	48	2.43312e-05	1.57687e-05	Cluster6
Potra2n7c16242	AP2	46	2.39362e-05	1.65062e-05	Cluster5
Potra2n10c20185	AP2	32	9.49886e-06	1.04524e-05	Cluster2
Potra2n7c16542	AP2	27	6.69956e-06	1.20822e-05	Cluster1
Potra2n10c20424	ARF	176	0.000118342	9.54924e-05	Cluster5
Potra2n5c10720	ARF	174	0.000258543	6.68846e-05	Cluster2
Potra2n6c14089	ARF	171	0.000203841	6.17472e-05	Cluster5
Potra2n14c27465	ARF	163	0.000101955	2.98496e-05	Cluster1
Potra2n3c7024	ARF	148	0.000107288	3.80242e-05	Cluster7
Potra2n17c30713	ARF	138	9.65252e-05	4.45769e-05	Cluster10
Potra2n12c24612	ARF	131	0.000127949	5.21991e-05	Cluster7
Potra2n1c530	ARF	130	0.000156976	3.54907e-05	Cluster3
Potra2n3c7212	ARF	118	0.000137619	3.26211e-05	Cluster5
Potra2n14c27134	ARF	107	8.0287e-05	4.1633e-05	Cluster6
Potra2n2c5595	ARF	72	3.73278e-05	1.49297e-05	Cluster5
Potra2n4c10269	ARF	69	2.81466e-05	1.62192e-05	Cluster4
Potra2n16c30085	ARF	65	2.2866e-05	2.88745e-05	Cluster5
Potra2n2c4845	ARF	63	6.6608e-05	2.98824e-05	Cluster5
Potra2n2c5934	ARF	62	5.17577e-05	2.63304e-05	Cluster7
Potra2n6c14195	ARF	53	3.1582e-05	1.25143e-05	Cluster2
Potra2n4c8843	ARF	52	2.41187e-05	3.00119e-05	Cluster7
Potra2n1c3166	ARF	50	1.76323e-05	1.55827e-05	Cluster7
Potra2n9c19984	ARF	49	2.30597e-05	1.09431e-05	Cluster3
Potra2n6c14670	ARF	49	1.57205e-05	3.3769e-05	Cluster5
Potra2n8c16955	ARF	49	2.26152e-05	1.68189e-05	Cluster5
Potra2n5c11331	ARF	49	2.95413e-05	1.45703e-05	Cluster7
Potra2n18c32724	ARF	47	3.67942e-05	1.89259e-05	Cluster2
Potra2n4c9121	ARF	44	2.52402e-05	1.61276e-05	Cluster2
Potra2n4c10421	ARF	40	1.0553e-05	1.39651e-05	Cluster1
Potra2n3c8400	ARF	38	1.87017e-05	1.75379e-05	Cluster7
Potra2n11c23001	ARF	35	2.77891e-05	2.08037e-05	Cluster7
Potra2n5c10995	ARF	34	1.27106e-05	1.82403e-05	Cluster5
Potra2n9c20012	ARF	33	9.4411e-06	9.94822e-06	Cluster8
Potra2n15c28227	ARF	24	8.20618e-06	1.82804e-05	Cluster5
Potra2n11c23281	ARF	24	6.4854e-06	2.17258e-05	Cluster6
Potra2n1c729	ARF	22	2.3765e-06	1.35688e-05	Cluster3
Potra2n5c10519	ARID	41	2.54242e-05	1.31216e-05	Cluster1
Potra2n10c21968	ARR-B	135	0.000109188	9.22628e-05	Cluster3
Potra2n8c17876	ARR-B	125	5.74597e-05	1.94227e-05	Cluster5
Potra2n8c18300	ARR-B	108	4.21885e-05	4.06374e-05	Cluster3
Potra2n10c22356	ARR-B	92	3.2437e-05	3.60228e-05	Cluster5
Potra2n1c1258	ARR-B	84	6.72914e-05	5.86183e-05	Cluster3
Potra2n8c18572	ARR-B	84	8.10979e-05	2.39067e-05	Cluster6
Potra2n18c32280	ARR-B	84	5.03472e-05	2.05589e-05	Cluster7
Potra2n18c33080	ARR-B	74	4.52369e-05	2.3052e-05	Cluster7
Potra2n14c26930	ARR-B	67	3.99365e-05	1.51499e-05	Cluster1
Potra2n2c5040	ARR-B	64	5.8487e-05	3.05773e-05	Cluster7
Potra2n706s36542	ARR-B	62	0.000101351	2.49521e-05	Cluster1
Potra2n6c12988	ARR-B	57	5.11825e-06	3.30564e-05	Cluster3
Potra2n6c13696	ARR-B	42	2.81491e-05	1.10528e-05	Cluster3
Potra2n10c21520	ARR-B	33	3.01828e-05	1.1105e-05	Cluster3
Potra2n15c29204	ARR-type	522	0.000270971	0.000300423	Cluster3
Potra2n14c27187	ARR-type	261	3.76097e-05	0.000219336	Cluster3
Potra2n8c17022	ARR-type	157	9.59625e-05	5.7189e-05	Cluster3
Potra2n2c4775	ARR-type	147	8.91532e-05	6.38996e-05	Cluster3
Potra2n12c23868	B3	458	0.000823683	8.40141e-05	Cluster1
Potra2n15c29077	B3	386	0.00020426	0.000109116	Cluster4
Potra2n15c29078	B3	351	2.43231e-05	4.78817e-05	Cluster8
Potra2n4c10348	B3	348	1.9808e-05	4.56775e-05	Cluster8
Potra2n15c29069	B3	285	9.66614e-05	0.00012787	Cluster6
Potra2n15c29065	B3	284	0.000122047	0.000115657	Cluster6
Potra2n4c9705	B3	274	0.000275932	5.6456e-05	Cluster4
Potra2n4c10343	B3	273	0.00025141	6.49622e-05	Cluster1
Potra2n3c8313	B3	241	5.62771e-05	3.16258e-05	Cluster1
Potra2n15c29076	B3	227	0.000333027	5.32484e-05	Cluster6
Potra2n12c23872	B3	220	0.000163151	3.85834e-05	Cluster1
Potra2n1c3808	B3	215	0.000172323	4.19244e-05	Cluster1
Potra2n3c8314	B3	214	0.000152274	4.78247e-05	Cluster1
Potra2n3c8315	B3	194	0.000184387	3.91134e-05	Cluster1
Potra2n14c26559	B3	194	0.000135593	6.12874e-05	Cluster6
Potra2n11c23317	B3	188	0.00014479	5.2075e-05	Cluster1
Potra2n14c27199	B3	184	0.000178743	4.53828e-05	Cluster1
Potra2n9c19162	B3	171	0.000134002	3.21508e-05	Cluster1
Potra2n15c29085	B3	166	0.000179828	3.70433e-05	Cluster1
Potra2n12c23865	B3	151	0.000182023	4.75386e-05	Cluster1
Potra2n5c11709	B3	150	1.87194e-05	2.27196e-05	Cluster1
Potra2n7c15640	B3	150	1.42582e-05	2.36414e-05	Cluster1
Potra2n3c6752	B3	147	2.14432e-05	2.6577e-05	Cluster1
Potra2n6c13502	B3	139	2.04875e-05	0.000105542	Cluster6
Potra2n6c14372	B3	136	0.000111728	6.71547e-05	Cluster7
Potra2n13c24963	B3	132	7.20209e-05	3.48347e-05	Cluster1
Potra2n5c11706	B3	127	9.68271e-05	2.84744e-05	Cluster1
Potra2n4c10345	B3	121	9.04954e-05	2.742e-05	Cluster1
Potra2n3c8316	B3	118	7.31701e-05	3.26138e-05	Cluster1
Potra2n4c8799	B3	118	0.000116396	2.94604e-05	Cluster1
Potra2n3c8287	B3	112	7.09558e-05	2.46223e-05	Cluster1
Potra2n4c9751	B3	110	0.000123144	3.02474e-05	Cluster1
Potra2n14c26603	B3	108	0.000131933	3.20739e-05	Cluster8
Potra2n4c10351	B3	107	7.68314e-05	2.1893e-05	Cluster1
Potra2n16c29929	B3	104	6.23616e-05	2.48913e-05	Cluster1
Potra2n9c19216	B3	103	7.36267e-05	2.26041e-05	Cluster1
Potra2n4c9752	B3	103	9.11252e-05	2.56046e-05	Cluster7
Potra2n3c8318	B3	101	8.41394e-05	3.12084e-05	Cluster1
Potra2n2c4759	B3	99	8.14243e-05	2.5509e-05	Cluster1
Potra2n9c19215	B3	99	6.52954e-05	2.58264e-05	Cluster7
Potra2n12c23863	B3	97	6.81422e-05	2.86875e-05	Cluster1
Potra2n11c23629	B3	96	4.95797e-05	2.74858e-05	Cluster1
Potra2n4c10433	B3	92	7.5042e-05	2.56739e-05	Cluster7
Potra2n11c22530	B3	91	7.40401e-05	2.93416e-05	Cluster1
Potra2n2c5603	B3	90	4.60603e-05	2.02762e-05	Cluster1
Potra2n14c26838	B3	90	0.000144903	4.5541e-05	Cluster3
Potra2n3c8283	B3	89	9.69164e-05	2.52702e-05	Cluster5
Potra2n10c20731	B3	88	4.27846e-05	1.91465e-05	Cluster1
Potra2n4c9704	B3	88	2.75508e-05	2.77255e-05	Cluster1
Potra2n16c30501	B3	86	3.82892e-05	2.56174e-05	Cluster7
Potra2n14c26602	B3	85	6.0842e-05	2.80033e-05	Cluster1
Potra2n4c10352	B3	84	5.0572e-05	1.9504e-05	Cluster1
Potra2n4c8704	B3	83	5.27452e-05	1.92106e-05	Cluster6
Potra2n2c5228	B3	79	4.83668e-05	3.1583e-05	Cluster2
Potra2n15c29086	B3	77	1.63811e-05	2.18105e-05	Cluster1
Potra2n234s35061	B3	75	4.22954e-05	1.33914e-05	Cluster5
Potra2n7c16319	B3	73	3.32436e-05	1.73783e-05	Cluster1
Potra2n4c10344	B3	69	3.47667e-05	1.80912e-05	Cluster1
Potra2n4c9750	B3	62	3.48671e-05	2.29986e-05	Cluster1
Potra2n9c19217	B3	62	2.62744e-05	2.33633e-05	Cluster7
Potra2n18c32075	B3	55	2.39361e-05	1.78027e-05	Cluster1
Potra2n1c2796	B3	52	2.37496e-05	2.58848e-05	Cluster2
Potra2n3c8291	B3	50	4.06712e-05	2.52195e-05	Cluster7
Potra2n9c19163	B3	27	1.12873e-05	1.33048e-05	Cluster1
Potra2n5c11607	B3	23	8.07577e-06	8.87451e-06	Cluster5
Potra2n4c9749	B3	14	4.23598e-06	9.1386e-06	Cluster6
Potra2n12c24055	BBR-BPC	98	3.26887e-05	2.58189e-05	Cluster8
Potra2n15c28921	BBR-BPC	74	4.66187e-05	1.89871e-05	Cluster1
Potra2n12c24053	BBR-BPC	72	3.33517e-05	2.2713e-05	Cluster1
Potra2n15c28922	BBR-BPC	62	2.66508e-05	1.59188e-05	Cluster4
Potra2n1c1155	BBR-BPC	50	1.81364e-05	1.49838e-05	Cluster4
Potra2n8c17915	BBR-BPC	42	1.50533e-05	1.19847e-05	Cluster1
Potra2n4c9892	BBR-BPC	37	1.15254e-05	8.85991e-06	Cluster1
Potra2n2c6203	BBR-BPC	27	5.93553e-06	1.31193e-05	Cluster1
Potra2n9c19017	BBR-BPC	22	1.58606e-05	1.66593e-05	Cluster5
Potra2n5c10730	BBR-BPC	20	5.83308e-06	1.08782e-05	Cluster1
Potra2n1c3373	BES1	229	0.000196422	4.48478e-05	Cluster6
Potra2n11c22924	BES1	128	0.000101051	3.40754e-05	Cluster2
Potra2n7c16358	BES1	98	6.90395e-05	2.27467e-05	Cluster4
Potra2n16c30402	BES1	98	7.66687e-05	2.53296e-05	Cluster7
Potra2n14c26986	BES1	83	5.65739e-05	2.57069e-05	Cluster1
Potra2n11c23181	BES1	78	7.69188e-05	2.56527e-05	Cluster5
Potra2n4c8982	BES1	59	5.57748e-05	2.32034e-05	Cluster5
Potra2n2c5198	BES1	49	2.14617e-05	1.81531e-05	Cluster1
Potra2n3c7561	BES1	39	1.61355e-05	1.29397e-05	Cluster1
Potra2n5c11677	BES1	38	1.73387e-05	1.65436e-05	Cluster5
Potra2n2c5125	bHLH	402	8.0523e-05	5.76134e-05	Cluster8
Potra2n5c10987	bHLH	402	8.97824e-05	7.50712e-05	Cluster8
Potra2n6c14437	bHLH	375	0.000491805	6.64356e-05	Cluster1
Potra2n9c19336	bHLH	362	0.00038283	8.87204e-05	Cluster6
Potra2n1c685	bHLH	346	0.000194418	0.000107888	Cluster6
Potra2n14c26823	bHLH	327	9.01545e-05	5.19808e-05	Cluster8
Potra2n5c11972	bHLH	326	0.00035156	9.38799e-05	Cluster6
Potra2n19c33527	bHLH	325	0.000749578	8.18948e-05	Cluster1
Potra2n2c4800	bHLH	324	0.000267657	0.000121599	Cluster6
Potra2n3c7678	bHLH	322	0.00044289	5.98148e-05	Cluster1
Potra2n2c5489	bHLH	321	7.20134e-05	5.06051e-05	Cluster8
Potra2n19c33491	bHLH	311	5.84338e-05	6.01522e-05	Cluster8
Potra2n11c23325	bHLH	305	0.000371085	0.000100585	Cluster6
Potra2n17c31495	bHLH	304	0.000304059	5.63731e-05	Cluster1
Potra2n3c7164	bHLH	302	0.000239875	4.8893e-05	Cluster1
Potra2n1c1631	bHLH	281	7.23178e-05	8.13587e-05	Cluster8
Potra2n19c33457	bHLH	278	0.000375903	0.000124406	Cluster6
Potra2n12c24601	bHLH	276	0.000162491	7.08757e-05	Cluster8
Potra2n9c19481	bHLH	274	0.000185245	8.90255e-05	Cluster6
Potra2n6c15087	bHLH	258	0.000129127	6.25329e-05	Cluster6
Potra2n2c5945	bHLH	258	4.45683e-05	4.82806e-05	Cluster8
Potra2n5c12229	bHLH	254	4.5971e-05	5.69595e-05	Cluster8
Potra2n2c4849	bHLH	242	0.000163281	3.97142e-05	Cluster6
Potra2n10c22086	bHLH	232	0.000164705	6.32737e-05	Cluster6
Potra2n14c26530	bHLH	229	0.000286589	7.63349e-05	Cluster6
Potra2n15c28072	bHLH	229	0.000222714	7.36956e-05	Cluster6
Potra2n16c29864	bHLH	227	0.000145079	4.54135e-05	Cluster1
Potra2n8c17660	bHLH	225	0.000136111	3.41629e-05	Cluster4
Potra2n19c33458	bHLH	209	0.000185623	6.10662e-05	Cluster6
Potra2n1c869	bHLH	207	0.00024078	5.98013e-05	Cluster6
Potra2n7c16556	bHLH	203	3.54706e-05	3.03487e-05	Cluster1
Potra2n10c21771	bHLH	201	0.000207053	5.41695e-05	Cluster6
Potra2n14c27191	bHLH	196	0.000132564	3.47648e-05	Cluster1
Potra2n18c32068	bHLH	194	0.000130478	6.73504e-05	Cluster6
Potra2n5c12811	bHLH	194	0.000163054	7.5042e-05	Cluster7
Potra2n18c32065	bHLH	191	8.5015e-05	4.8425e-05	Cluster6
Potra2n4c9587	bHLH	186	0.000170205	3.48729e-05	Cluster1
Potra2n7c16258	bHLH	186	0.000169448	3.36661e-05	Cluster4
Potra2n13c25677	bHLH	184	0.000171776	5.47209e-05	Cluster1
Potra2n5c10901	bHLH	183	7.93634e-05	0.000168533	Cluster5
Potra2n14c27129	bHLH	178	0.000127828	4.02353e-05	Cluster6
Potra2n13c25173	bHLH	177	6.99312e-05	0.00010707	Cluster6
Potra2n15c28073	bHLH	171	0.000268642	3.84044e-05	Cluster7
Potra2n1c521	bHLH	170	0.000167841	3.38293e-05	Cluster1
Potra2n3c7688	bHLH	168	0.000150298	5.03741e-05	Cluster3
Potra2n14c27237	bHLH	167	0.000177518	6.83024e-05	Cluster3
Potra2n13c25938	bHLH	166	0.000113497	5.10133e-05	Cluster5
Potra2n2c5372	bHLH	161	5.9778e-05	3.59663e-05	Cluster2
Potra2n2c5436	bHLH	160	7.46294e-05	7.87916e-05	Cluster3
Potra2n11c23233	bHLH	157	1.53493e-05	2.64943e-05	Cluster1
Potra2n2c4772	bHLH	155	9.08315e-05	3.72289e-05	Cluster1
Potra2n2c4166	bHLH	152	6.31712e-05	7.19813e-05	Cluster2
Potra2n14c27167	bHLH	152	4.3243e-05	4.88711e-05	Cluster6
Potra2n6c13712	bHLH	148	0.000110072	2.95411e-05	Cluster2
Potra2n1c1217	bHLH	144	6.64967e-05	5.14536e-05	Cluster6
Potra2n11c23444	bHLH	141	9.77342e-05	8.56157e-05	Cluster3
Potra2n5c11519	bHLH	141	6.03537e-05	3.27841e-05	Cluster4
Potra2n6c14001	bHLH	140	0.000101546	2.64248e-05	Cluster1
Potra2n1c2330	bHLH	138	0.000173062	4.32465e-05	Cluster6
Potra2n14c27598	bHLH	137	0.000132144	4.97006e-05	Cluster2
Potra2n6c14704	bHLH	137	5.50788e-05	2.06456e-05	Cluster8
Potra2n2c4129	bHLH	134	0.000109433	3.81752e-05	Cluster4
Potra2n12c24611	bHLH	132	0.000144461	3.42852e-05	Cluster3
Potra2n7c15743	bHLH	132	0.000164443	3.15496e-05	Cluster7
Potra2n1c2613	bHLH	125	4.73388e-05	2.894e-05	Cluster1
Potra2n2c6068	bHLH	122	0.000123867	4.34476e-05	Cluster7
Potra2n3c7165	bHLH	121	8.25145e-05	3.04312e-05	Cluster1
Potra2n4c8651	bHLH	117	0.000127241	3.71101e-05	Cluster5
Potra2n15c28238	bHLH	115	6.14289e-05	3.0586e-05	Cluster8
Potra2n12c24387	bHLH	114	8.05176e-05	3.23474e-05	Cluster1
Potra2n15c28228	bHLH	114	7.89847e-05	2.32083e-05	Cluster3
Potra2n6c13561	bHLH	114	4.65955e-05	3.06228e-05	Cluster8
Potra2n13c25285	bHLH	113	5.92308e-05	2.60308e-05	Cluster1
Potra2n12c24253	bHLH	113	6.8049e-05	5.65695e-05	Cluster6
Potra2n5c11439	bHLH	112	5.06921e-05	4.09871e-05	Cluster5
Potra2n7c15847	bHLH	112	0.00010077	2.92525e-05	Cluster6
Potra2n11c23095	bHLH	112	8.84605e-05	2.59855e-05	Cluster7
Potra2n16c29522	bHLH	111	5.17942e-05	3.18357e-05	Cluster7
Potra2n14c26517	bHLH	108	7.07386e-05	2.89121e-05	Cluster1
Potra2n8c18385	bHLH	108	9.45436e-05	2.93873e-05	Cluster1
Potra2n15c28775	bHLH	107	0.000115606	4.03708e-05	Cluster6
Potra2n5c12498	bHLH	106	5.17285e-05	2.62189e-05	Cluster2
Potra2n16c29691	bHLH	106	7.51505e-05	3.20299e-05	Cluster3
Potra2n19c34091	bHLH	101	8.76193e-05	2.63719e-05	Cluster1
Potra2n13c26301	bHLH	101	0.00012513	5.9917e-05	Cluster5
Potra2n8c17251	bHLH	101	0.000130855	2.65931e-05	Cluster8
Potra2n16c30362	bHLH	100	4.86955e-05	3.34536e-05	Cluster1
Potra2n16c29544	bHLH	98	7.86845e-05	2.70205e-05	Cluster6
Potra2n2c6038	bHLH	97	7.43746e-05	2.71624e-05	Cluster3
Potra2n1c143	bHLH	96	7.12949e-05	3.63845e-05	Cluster7
Potra2n2c6150	bHLH	95	0.000110808	3.70284e-05	Cluster3
Potra2n10c21811	bHLH	93	3.60423e-05	1.72527e-05	Cluster6
Potra2n11c22457	bHLH	90	9.52257e-05	2.46494e-05	Cluster1
Potra2n2c4300	bHLH	90	7.04592e-05	2.88594e-05	Cluster1
Potra2n4c9466	bHLH	90	5.70017e-05	2.81696e-05	Cluster1
Potra2n5c11804	bHLH	90	7.35762e-05	2.10481e-05	Cluster3
Potra2n4c9827	bHLH	90	3.79972e-05	3.56812e-05	Cluster7
Potra2n6c14701	bHLH	88	5.76007e-05	3.76836e-05	Cluster6
Potra2n5c12383	bHLH	86	5.848e-05	2.57758e-05	Cluster5
Potra2n19c33573	bHLH	85	5.35211e-05	2.26144e-05	Cluster1
Potra2n9c19924	bHLH	83	5.26363e-05	2.05586e-05	Cluster1
Potra2n15c28616	bHLH	81	4.59805e-05	2.19282e-05	Cluster1
Potra2n13c26068	bHLH	81	3.80909e-05	3.62224e-05	Cluster2
Potra2n12c24334	bHLH	80	3.26647e-05	2.25461e-05	Cluster1
Potra2n9c18923	bHLH	80	6.73322e-05	2.70713e-05	Cluster7
Potra2n1c1204	bHLH	79	3.54257e-05	2.11587e-05	Cluster1
Potra2n6c14116	bHLH	79	4.04406e-05	2.38472e-05	Cluster2
Potra2n19c34092	bHLH	75	5.72739e-05	2.06604e-05	Cluster1
Potra2n19c33663	bHLH	74	3.95789e-05	2.33975e-05	Cluster3
Potra2n2c5461	bHLH	72	5.814e-05	2.33969e-05	Cluster5
Potra2n8c18121	bHLH	71	3.75654e-05	2.04481e-05	Cluster1
Potra2n17c31217	bHLH	70	3.18961e-05	2.01036e-05	Cluster1
Potra2n9c19403	bHLH	69	5.73533e-05	1.7122e-05	Cluster5
Potra2n4c8672	bHLH	67	3.75195e-05	1.98133e-05	Cluster1
Potra2n3c8013	bHLH	65	3.58055e-05	2.74515e-05	Cluster7
Potra2n6c15090	bHLH	65	2.80692e-05	1.6536e-05	Cluster7
Potra2n6c14888	bHLH	64	3.98758e-05	2.18184e-05	Cluster5
Potra2n10c21206	bHLH	63	2.62928e-05	1.37286e-05	Cluster1
Potra2n8c17692	bHLH	63	7.14696e-05	1.38504e-05	Cluster3
Potra2n10c20774	bHLH	63	4.66254e-05	1.83268e-05	Cluster6
Potra2n10c21280	bHLH	62	3.94303e-05	2.10002e-05	Cluster2
Potra2n6c14895	bHLH	62	3.6697e-05	1.42215e-05	Cluster6
Potra2n16c29695	bHLH	60	2.59828e-05	1.56409e-05	Cluster1
Potra2n2c5278	bHLH	60	2.23961e-05	1.62e-05	Cluster1
Potra2n8c18375	bHLH	60	3.71454e-05	1.61227e-05	Cluster1
Potra2n3c7342	bHLH	60	2.13349e-05	1.72803e-05	Cluster10
Potra2n3c6608	bHLH	58	3.5338e-05	2.07754e-05	Cluster3
Potra2n5c10872	bHLH	57	5.79997e-05	1.59197e-05	Cluster3
Potra2n6c13028	bHLH	56	2.88147e-05	1.70756e-05	Cluster1
Potra2n4c9933	bHLH	56	2.91982e-05	2.39443e-05	Cluster7
Potra2n2c5930	bHLH	52	3.48255e-05	1.66544e-05	Cluster3
Potra2n1c3618	bHLH	52	2.77812e-05	2.58708e-05	Cluster5
Potra2n14c26516	bHLH	52	1.89282e-05	1.31147e-05	Cluster8
Potra2n9c20068	bHLH	51	3.75787e-05	1.38401e-05	Cluster1
Potra2n1c3597	bHLH	49	4.21126e-05	2.03627e-05	Cluster1
Potra2n8c17647	bHLH	48	1.3369e-05	1.08097e-05	Cluster1
Potra2n15c28000	bHLH	46	3.2706e-05	1.49349e-05	Cluster1
Potra2n13c25385	bHLH	45	1.82062e-05	1.51584e-05	Cluster1
Potra2n11c22702	bHLH	44	1.99754e-05	2.49789e-05	Cluster3
Potra2n2c4974	bHLH	43	1.9518e-05	1.56841e-05	Cluster7
Potra2n10c21220	bHLH	42	1.97309e-05	1.79444e-05	Cluster6
Potra2n17c31031	bHLH	41	2.7984e-05	1.50614e-05	Cluster6
Potra2n6c15089	bHLH	40	2.35663e-05	1.56386e-05	Cluster2
Potra2n18c32067	bHLH	40	2.84905e-05	1.76257e-05	Cluster6
Potra2n8c18161	bHLH	39	1.5482e-05	1.31279e-05	Cluster1
Potra2n9c19090	bHLH	38	1.84266e-05	1.02925e-05	Cluster3
Potra2n9c18985	bHLH	37	8.73367e-06	1.4618e-05	Cluster1
Potra2n2c4344	bHLH	34	9.57087e-06	1.29591e-05	Cluster6
Potra2n14c27612	bHLH	33	2.25288e-05	1.10961e-05	Cluster5
Potra2n5c10780	bHLH	31	5.36481e-06	7.8974e-06	Cluster1
Potra2n17c30917	bHLH	30	9.65818e-06	1.45304e-05	Cluster1
Potra2n3c7866	bHLH	28	5.48551e-06	1.031e-05	Cluster3
Potra2n5c10998	bHLH	27	1.29273e-05	1.44244e-05	Cluster5
Potra2n11c22674	bHLH	19	2.87966e-06	1.63795e-05	Cluster2
Potra2n18c32296	bHLH	17	1.8758e-06	1.22592e-05	Cluster3
Potra2n5c11590	bHLH	12	1.43593e-06	7.3068e-06	Cluster7
Potra2n13c25197	bHLH	9	1.0526e-06	9.36304e-06	Cluster3
Potra2n13c25941	bZIP	365	0.000293089	8.85668e-05	Cluster3
Potra2n6c14875	bZIP	362	0.000288404	5.93827e-05	Cluster1
Potra2n10c20228	bZIP	346	0.000311766	0.000152562	Cluster3
Potra2n2c6286	bZIP	333	0.000115328	9.13373e-05	Cluster3
Potra2n6c14620	bZIP	252	4.5015e-05	3.43661e-05	Cluster1
Potra2n673s36378	bZIP	250	0.000135224	0.000203765	Cluster5
Potra2n10c22315	bZIP	243	0.000268749	0.00010506	Cluster3
Potra2n9c18685	bZIP	231	0.000184353	4.79694e-05	Cluster5
Potra2n1c627	bZIP	228	0.000118762	4.24094e-05	Cluster8
Potra2n2c6035	bZIP	217	8.54036e-05	8.72301e-05	Cluster6
Potra2n16c29497	bZIP	190	0.000122509	3.95622e-05	Cluster3
Potra2n5c11148	bZIP	163	0.00012045	4.31207e-05	Cluster5
Potra2n1c3284	bZIP	161	0.000223421	3.96035e-05	Cluster1
Potra2n2c5164	bZIP	154	9.78562e-05	4.3144e-05	Cluster2
Potra2n2c6156	bZIP	149	9.31271e-05	2.23532e-05	Cluster5
Potra2n9c19233	bZIP	147	0.000175468	0.000121636	Cluster6
Potra2n7c16463	bZIP	145	0.000139746	3.45125e-05	Cluster7
Potra2n1c1159	bZIP	141	0.000143556	3.25233e-05	Cluster1
Potra2n2c5587	bZIP	140	0.000113099	4.01066e-05	Cluster7
Potra2n5c12122	bZIP	133	5.7814e-05	7.49624e-05	Cluster5
Potra2n2c4901	bZIP	128	4.82716e-05	5.03014e-05	Cluster3
Potra2n10c21157	bZIP	124	0.000108773	3.26609e-05	Cluster1
Potra2n9c18683	bZIP	124	8.75809e-05	2.2142e-05	Cluster1
Potra2n8c16778	bZIP	124	9.52381e-05	4.94698e-05	Cluster7
Potra2n4c9694	bZIP	120	2.94228e-05	8.9089e-05	Cluster3
Potra2n5c10904	bZIP	111	0.000117706	2.7482e-05	Cluster7
Potra2n4c9844	bZIP	110	8.02822e-05	3.05499e-05	Cluster5
Potra2n4c9450	bZIP	109	3.83138e-05	3.79739e-05	Cluster5
Potra2n10c21228	bZIP	107	5.95426e-05	5.42973e-05	Cluster3
Potra2n6c15166	bZIP	106	8.20143e-05	1.99772e-05	Cluster4
Potra2n5c11336	bZIP	105	4.98456e-05	4.9679e-05	Cluster5
Potra2n6c14314	bZIP	103	4.54485e-05	1.61756e-05	Cluster3
Potra2n2c4633	bZIP	102	7.4822e-05	3.09842e-05	Cluster1
Potra2n8c17714	bZIP	98	4.93868e-05	1.91094e-05	Cluster1
Potra2n5c10648	bZIP	95	7.47911e-05	2.82531e-05	Cluster5
Potra2n2c5788	bZIP	94	5.99205e-05	3.35123e-05	Cluster5
Potra2n4c10196	bZIP	92	4.5254e-05	2.84259e-05	Cluster3
Potra2n10c20174	bZIP	89	8.8448e-05	2.69023e-05	Cluster3
Potra2n2c5269	bZIP	86	1.88304e-05	3.28381e-05	Cluster3
Potra2n19c33290	bZIP	86	4.4112e-05	2.75241e-05	Cluster7
Potra2n5c11128	bZIP	80	4.02389e-05	1.69428e-05	Cluster7
Potra2n5c11840	bZIP	79	8.22384e-05	2.08194e-05	Cluster3
Potra2n6c15115	bZIP	78	4.36532e-05	1.66983e-05	Cluster7
Potra2n16c29680	bZIP	75	4.61929e-05	2.03592e-05	Cluster10
Potra2n3c7639	bZIP	73	5.08501e-05	2.32587e-05	Cluster1
Potra2n8c17663	bZIP	73	2.11049e-05	5.08874e-05	Cluster3
Potra2n16c29535	bZIP	72	1.53767e-05	4.77173e-05	Cluster5
Potra2n369s35436	bZIP	71	3.65037e-05	1.79247e-05	Cluster1
Potra2n19c33561	bZIP	68	4.20161e-05	2.37853e-05	Cluster1
Potra2n16c29445	bZIP	68	3.41562e-05	2.01992e-05	Cluster6
Potra2n6c15078	bZIP	64	4.5703e-05	2.15494e-05	Cluster5
Potra2n13c24971	bZIP	64	4.09822e-05	2.80441e-05	Cluster6
Potra2n4c9990	bZIP	61	2.88235e-05	1.26833e-05	Cluster3
Potra2n7c16366	bZIP	61	3.19209e-05	1.2896e-05	Cluster5
Potra2n19c33496	bZIP	56	2.98256e-05	1.43887e-05	Cluster1
Potra2n7c15534	bZIP	56	2.21825e-05	1.79381e-05	Cluster1
Potra2n1c1917	bZIP	55	1.8555e-05	1.56445e-05	Cluster1
Potra2n1c244	bZIP	54	2.74385e-05	2.09622e-05	Cluster6
Potra2n4c9893	bZIP	53	2.44991e-05	1.17646e-05	Cluster3
Potra2n14c27082	bZIP	53	4.78999e-05	2.30797e-05	Cluster5
Potra2n8c16719	bZIP	52	1.35375e-05	1.01265e-05	Cluster1
Potra2n14c26371	bZIP	51	1.70891e-05	1.73651e-05	Cluster1
Potra2n5c10513	bZIP	51	3.58182e-05	1.89013e-05	Cluster5
Potra2n9c18937	bZIP	50	2.18168e-05	1.26148e-05	Cluster10
Potra2n14c27320	bZIP	50	2.36321e-05	2.0431e-05	Cluster9
Potra2n6c12860	bZIP	49	3.05551e-05	1.79251e-05	Cluster3
Potra2n9c19016	bZIP	49	5.08376e-05	1.76932e-05	Cluster3
Potra2n5c11681	bZIP	47	1.98782e-05	1.12872e-05	Cluster3
Potra2n6c13087	bZIP	44	2.24392e-05	1.54455e-05	Cluster2
Potra2n2c5816	bZIP	43	3.83169e-05	1.74846e-05	Cluster5
Potra2n1c167	bZIP	42	3.35077e-05	1.74183e-05	Cluster5
Potra2n13c25219	bZIP	40	1.4337e-05	1.18695e-05	Cluster3
Potra2n3c6723	bZIP	39	3.95563e-05	2.22359e-05	Cluster5
Potra2n17c31613	bZIP	38	1.16186e-05	1.81857e-05	Cluster7
Potra2n14c26536	bZIP	37	9.50217e-06	2.35675e-05	Cluster5
Potra2n3c6630	bZIP	26	1.75298e-05	1.02497e-05	Cluster3
Potra2n7c16587	bZIP	23	9.26419e-06	1.68896e-05	Cluster5
Potra2n18c32994	bZIP	15	4.88392e-06	1.1202e-05	Cluster3
Potra2n18c33256	C2H2	432	0.000534667	8.53223e-05	Cluster10
Potra2n2c5326	C2H2	329	0.000194538	8.5689e-05	Cluster6
Potra2n10c21580	C2H2	292	0.000115381	6.71119e-05	Cluster8
Potra2n17c30908	C2H2	285	0.000100594	4.31514e-05	Cluster8
Potra2n1509s37113	C2H2	277	0.000285668	5.42943e-05	Cluster1
Potra2n9c18811	C2H2	248	0.000201829	0.000131274	Cluster6
Potra2n369s35435	C2H2	245	0.000268985	5.45195e-05	Cluster1
Potra2n6c14559	C2H2	227	0.000135717	2.69492e-05	Cluster1
Potra2n18c32191	C2H2	226	0.000224034	4.25413e-05	Cluster1
Potra2n17c31126	C2H2	225	0.000139902	8.68327e-05	Cluster7
Potra2n4c10104	C2H2	213	0.000138327	0.000111915	Cluster6
Potra2n11c22379	C2H2	205	0.000248106	5.30031e-05	Cluster1
Potra2n16c30161	C2H2	198	6.18266e-05	0.000134928	Cluster5
Potra2n1c2577	C2H2	187	7.9337e-05	7.33916e-05	Cluster5
Potra2n8c17897	C2H2	180	0.000142444	4.65992e-05	Cluster5
Potra2n5c10868	C2H2	169	0.000134946	2.73648e-05	Cluster1
Potra2n10c21290	C2H2	166	3.075e-05	2.81443e-05	Cluster1
Potra2n3c6624	C2H2	163	3.91867e-05	4.70682e-05	Cluster8
Potra2n9c19332	C2H2	161	9.97827e-05	4.21323e-05	Cluster5
Potra2n13c25375	C2H2	154	0.000152128	3.75553e-05	Cluster1
Potra2n8c17939	C2H2	152	0.000149397	2.70636e-05	Cluster3
Potra2n18c33196	C2H2	150	0.000139309	2.64922e-05	Cluster1
Potra2n5c10926	C2H2	144	5.4785e-05	5.22808e-05	Cluster6
Potra2n2c6010	C2H2	141	1.72075e-05	7.73312e-05	Cluster3
Potra2n1c2820	C2H2	138	0.00010048	2.69455e-05	Cluster1
Potra2n16c30187	C2H2	137	9.84742e-06	2.74241e-05	Cluster1
Potra2n1c2005	C2H2	137	0.000122033	3.25935e-05	Cluster8
Potra2n10c20555	C2H2	135	5.99939e-05	8.23242e-05	Cluster5
Potra2n14c27573	C2H2	135	0.000110755	3.26921e-05	Cluster7
Potra2n1c2946	C2H2	134	9.07349e-05	2.64171e-05	Cluster1
Potra2n1c1089	C2H2	132	0.000108606	2.99029e-05	Cluster1
Potra2n15c28920	C2H2	132	0.000145074	3.04832e-05	Cluster7
Potra2n2c4030	C2H2	129	0.000124727	3.48106e-05	Cluster5
Potra2n7c16372	C2H2	126	0.0001017	3.37725e-05	Cluster6
Potra2n3c8071	C2H2	125	0.000132896	2.55777e-05	Cluster1
Potra2n16c29709	C2H2	122	0.000119784	2.81886e-05	Cluster7
Potra2n14c27883	C2H2	114	7.85837e-05	3.03679e-05	Cluster1
Potra2n9c19749	C2H2	113	4.87357e-05	2.62049e-05	Cluster4
Potra2n5c11310	C2H2	112	0.000110024	2.84609e-05	Cluster1
Potra2n10c21180	C2H2	109	9.91477e-05	2.65599e-05	Cluster1
Potra2n787s36762	C2H2	106	7.48608e-05	2.19655e-05	Cluster1
Potra2n6c14861	C2H2	105	1.29121e-05	2.60795e-05	Cluster3
Potra2n14c27353	C2H2	103	7.24767e-05	2.56428e-05	Cluster1
Potra2n5c12595	C2H2	103	0.000103208	2.16848e-05	Cluster8
Potra2n14c26445	C2H2	102	4.57792e-05	2.48633e-05	Cluster6
Potra2n10c21541	C2H2	101	9.14153e-05	2.95512e-05	Cluster1
Potra2n2c6233	C2H2	101	7.30426e-05	2.08905e-05	Cluster2
Potra2n16c30071	C2H2	101	5.34918e-05	2.13873e-05	Cluster3
Potra2n18c32807	C2H2	100	7.42776e-05	3.03043e-05	Cluster7
Potra2n17c31793	C2H2	97	6.50417e-05	2.51522e-05	Cluster1
Potra2n8c17916	C2H2	92	5.43384e-05	2.05471e-05	Cluster1
Potra2n16c30122	C2H2	91	6.01899e-05	2.06646e-05	Cluster7
Potra2n8c17938	C2H2	87	6.41647e-05	2.45013e-05	Cluster3
Potra2n10c21581	C2H2	87	2.12485e-05	2.51209e-05	Cluster8
Potra2n3c7840	C2H2	85	3.14808e-05	2.24261e-05	Cluster7
Potra2n1c2311	C2H2	84	4.60352e-05	2.39355e-05	Cluster1
Potra2n10c20407	C2H2	84	5.64808e-05	2.02493e-05	Cluster7
Potra2n12c24052	C2H2	82	4.40369e-05	2.01794e-05	Cluster1
Potra2n10c21025	C2H2	81	5.92482e-05	2.63473e-05	Cluster1
Potra2n2c4388	C2H2	81	6.42906e-05	2.11251e-05	Cluster1
Potra2n9c19912	C2H2	81	8.508e-05	2.49074e-05	Cluster1
Potra2n17c30772	C2H2	78	4.97754e-05	1.97483e-05	Cluster3
Potra2n18c33079	C2H2	72	5.50268e-05	2.19966e-05	Cluster6
Potra2n10c20652	C2H2	69	2.74246e-05	1.75235e-05	Cluster1
Potra2n1c2038	C2H2	69	3.30539e-05	1.98742e-05	Cluster1
Potra2n5c11684	C2H2	68	3.97552e-05	1.9546e-05	Cluster4
Potra2n7c15492	C2H2	68	2.1923e-05	1.24234e-05	Cluster6
Potra2n14c26818	C2H2	66	3.65976e-05	2.54054e-05	Cluster1
Potra2n2c5525	C2H2	65	5.57729e-05	1.60914e-05	Cluster3
Potra2n18c32447	C2H2	62	4.25292e-05	1.76174e-05	Cluster1
Potra2n4c10059	C2H2	61	2.20713e-05	1.34936e-05	Cluster1
Potra2n19c33606	C2H2	61	7.07999e-05	3.12292e-05	Cluster6
Potra2n19c33650	C2H2	60	3.72278e-05	1.5647e-05	Cluster7
Potra2n6c14179	C2H2	60	3.46974e-05	1.39324e-05	Cluster8
Potra2n10c21559	C2H2	59	3.40653e-05	2.26743e-05	Cluster6
Potra2n19c33937	C2H2	59	2.10477e-05	2.14915e-05	Cluster7
Potra2n2c6070	C2H2	59	2.19257e-05	1.53241e-05	Cluster8
Potra2n3c6857	C2H2	59	2.3302e-05	1.62402e-05	Cluster8
Potra2n8c16942	C2H2	53	1.99853e-05	1.28546e-05	Cluster7
Potra2n6c13318	C2H2	52	3.65363e-05	2.09685e-05	Cluster5
Potra2n4c9512	C2H2	50	1.58511e-05	1.25087e-05	Cluster1
Potra2n4c9178	C2H2	50	4.19605e-06	3.23457e-05	Cluster5
Potra2n4c10357	C2H2	48	1.1615e-05	1.64144e-05	Cluster1
Potra2n10c20360	C2H2	47	1.51929e-05	1.48979e-05	Cluster1
Potra2n12c24909	C2H2	47	2.11278e-05	1.32241e-05	Cluster5
Potra2n8c17072	C2H2	46	7.86106e-06	2.31229e-05	Cluster5
Potra2n9c19888	C2H2	44	3.20281e-05	1.33912e-05	Cluster5
Potra2n7c15884	C2H2	43	4.02268e-05	1.57188e-05	Cluster5
Potra2n9c18863	C2H2	43	2.47502e-05	1.95242e-05	Cluster5
Potra2n1c384	C2H2	43	1.53028e-05	1.90544e-05	Cluster6
Potra2n1c2173	C2H2	43	2.16228e-05	1.87713e-05	Cluster7
Potra2n1c2873	C2H2	39	4.5925e-05	3.39612e-05	Cluster7
Potra2n13c25322	C2H2	37	1.7699e-05	1.42293e-05	Cluster1
Potra2n1509s37114	C2H2	37	9.51132e-06	1.26661e-05	Cluster1
Potra2n1c1384	C2H2	36	1.02195e-05	1.13408e-05	Cluster5
Potra2n6c14298	C2H2	35	1.55817e-05	1.63503e-05	Cluster1
Potra2n14c26503	C2H2	34	9.19555e-06	8.7864e-06	Cluster5
Potra2n5c10706	C2H2	33	2.03054e-05	1.70727e-05	Cluster3
Potra2n15c28395	C2H2	32	2.10082e-05	1.28944e-05	Cluster2
Potra2n5c11327	C2H2	26	8.76055e-06	9.60728e-06	Cluster6
Potra2n6c14942	C2H2	24	8.43388e-06	9.57955e-06	Cluster1
Potra2n5c10869	C2H2	24	1.53717e-05	1.14507e-05	Cluster4
Potra2n13c26137	C2H2	24	1.05122e-05	1.32262e-05	Cluster5
Potra2n15c27970	C2H2	20	5.61264e-06	1.13578e-05	Cluster6
Potra2n2c5121	C2H2	19	1.14584e-05	1.09317e-05	Cluster5
Potra2n4c10314	C2H2	16	3.85695e-06	1.05029e-05	Cluster7
Potra2n8c17757	C2H2	15	3.20187e-06	6.54363e-06	Cluster5
Potra2n3c8329	C2H2	13	4.31474e-07	1.14378e-05	Cluster5
Potra2n8c17472	C2H2	11	3.95179e-06	7.37883e-06	Cluster5
Potra2n9c19656	C3H	455	0.000147294	8.44343e-05	Cluster4
Potra2n7c15466	C3H	253	8.81769e-05	4.74869e-05	Cluster4
Potra2n2c4472	C3H	211	7.36537e-05	9.18692e-05	Cluster3
Potra2n8c17239	C3H	152	0.000116824	3.29218e-05	Cluster6
Potra2n19c33941	C3H	133	1.7711e-05	0.000126045	Cluster3
Potra2n11c23304	C3H	132	9.67369e-05	4.00065e-05	Cluster1
Potra2n9c19449	C3H	124	0.00011034	4.24404e-05	Cluster3
Potra2n16c29719	C3H	121	0.000120798	3.6087e-05	Cluster4
Potra2n17c30876	C3H	115	0.000233249	4.11294e-05	Cluster10
Potra2n8c17338	C3H	108	7.48351e-05	2.17296e-05	Cluster7
Potra2n6c13243	C3H	105	7.16391e-05	4.65034e-05	Cluster3
Potra2n3c7926	C3H	97	4.61793e-05	2.2056e-05	Cluster1
Potra2n18c32778	C3H	97	0.000103314	4.87142e-05	Cluster5
Potra2n10c22209	C3H	95	6.12319e-05	2.12694e-05	Cluster1
Potra2n5c11281	C3H	95	6.75667e-05	2.07296e-05	Cluster1
Potra2n12c24500	C3H	95	7.8233e-05	3.47709e-05	Cluster7
Potra2n127s34649	C3H	93	5.09709e-05	3.1048e-05	Cluster1
Potra2n8c17948	C3H	87	4.31039e-05	1.95207e-05	Cluster7
Potra2n10c20870	C3H	83	2.46326e-06	3.77447e-05	Cluster3
Potra2n13c26263	C3H	81	6.61016e-05	2.32546e-05	Cluster1
Potra2n6c13973	C3H	78	4.70959e-05	1.70097e-05	Cluster7
Potra2n7c15745	C3H	77	3.21281e-05	1.38759e-05	Cluster6
Potra2n8c18557	C3H	75	3.01273e-05	1.24625e-05	Cluster1
Potra2n1c2968	C3H	75	2.89471e-05	3.23904e-05	Cluster7
Potra2n12c24831	C3H	74	3.80943e-05	1.85943e-05	Cluster1
Potra2n10c21590	C3H	73	6.14905e-05	2.22244e-05	Cluster7
Potra2n4c9639	C3H	71	3.48349e-05	1.92311e-05	Cluster1
Potra2n1c1203	C3H	70	3.84263e-05	1.42506e-05	Cluster4
Potra2n9c18976	C3H	70	4.22362e-05	1.69385e-05	Cluster7
Potra2n4c9297	C3H	68	9.51666e-06	3.71624e-05	Cluster5
Potra2n6c14638	C3H	63	3.352e-05	2.1605e-05	Cluster1
Potra2n7c16520	C3H	60	2.54449e-05	1.09388e-05	Cluster1
Potra2n9c19717	C3H	60	3.62097e-05	2.55447e-05	Cluster5
Potra2n6c13662	C3H	55	2.33617e-05	1.26792e-05	Cluster1
Potra2n16c29648	C3H	54	2.32252e-05	1.91437e-05	Cluster1
Potra2n766s36723	C3H	52	1.55368e-05	1.36421e-05	Cluster1
Potra2n5c12323	C3H	52	2.78466e-05	1.86708e-05	Cluster7
Potra2n234s35065	C3H	50	2.32989e-05	1.84831e-05	Cluster1
Potra2n4c9947	C3H	48	1.44199e-05	9.9982e-06	Cluster6
Potra2n15c28393	C3H	47	3.54674e-05	1.65468e-05	Cluster7
Potra2n15c28044	C3H	44	1.24881e-05	1.18506e-05	Cluster4
Potra2n1c2313	C3H	44	1.95927e-05	1.16495e-05	Cluster4
Potra2n9c19464	C3H	44	2.33533e-05	1.53657e-05	Cluster8
Potra2n3c6557	C3H	43	1.36809e-05	1.55504e-05	Cluster1
Potra2n10c21389	C3H	34	1.11048e-05	2.4588e-05	Cluster7
Potra2n6c14004	C3H	33	2.06988e-05	1.44969e-05	Cluster7
Potra2n14c27110	C3H	32	1.92812e-05	1.23177e-05	Cluster5
Potra2n1c2196	C3H	31	1.84709e-05	1.68653e-05	Cluster2
Potra2n8c17016	C3H	28	4.93615e-06	1.62658e-05	Cluster6
Potra2n14c27687	C3H	26	7.10884e-06	1.27398e-05	Cluster3
Potra2n3c7673	C3H	22	2.69592e-06	1.20032e-05	Cluster1
Potra2n13c25542	C3H	22	2.02739e-05	1.21352e-05	Cluster3
Potra2n1c2302	C3H	14	2.92602e-06	1.05068e-05	Cluster7
Potra2n1c476	CAMTA	265	0.000176145	0.000114232	Cluster6
Potra2n5c12188	CAMTA	136	8.06985e-05	4.27026e-05	Cluster6
Potra2n3c6952	CAMTA	113	3.80544e-05	5.01628e-05	Cluster6
Potra2n7c15890	CAMTA	52	3.68498e-05	4.06096e-05	Cluster7
Potra2n10c21169	CAMTA	33	9.54346e-06	1.63628e-05	Cluster7
Potra2n10c21069	CAMTA	15	5.24705e-06	1.1452e-05	Cluster5
Potra2n1c512	CO-like	372	7.67597e-05	0.000194605	Cluster3
Potra2n14c27785	CO-like	293	6.60671e-05	0.000186703	Cluster3
Potra2n266s35158	CO-like	266	6.8554e-05	0.000198046	Cluster3
Potra2n17c30991	CO-like	231	3.70915e-05	0.000143217	Cluster3
Potra2n18c32413	CO-like	204	0.000164968	8.89072e-05	Cluster3
Potra2n8c17778	CO-like	193	0.000120326	7.55038e-05	Cluster3
Potra2n7c15614	CO-like	168	0.00010395	2.18963e-05	Cluster1
Potra2n2c4422	CO-like	126	9.02149e-05	2.46334e-05	Cluster6
Potra2n1c2805	CO-like	123	0.000113554	2.49811e-05	Cluster6
Potra2n4c9430	CO-like	120	4.76543e-05	1.90589e-05	Cluster3
Potra2n6c12932	CO-like	111	7.7216e-05	3.50003e-05	Cluster7
Potra2n8c17734	CO-like	88	6.29844e-05	1.60231e-05	Cluster2
Potra2n14c27459	CO-like	87	4.37503e-05	2.25657e-05	Cluster1
Potra2n10c21332	CO-like	59	7.80012e-06	1.90619e-05	Cluster8
Potra2n3c6996	CO-like	39	1.358e-05	1.70575e-05	Cluster1
Potra2n18c33136	CO-like	13	2.43574e-06	1.3142e-05	Cluster3
Potra2n10c20493	CO-like	380	9.31066e-05	0.000274503	Cluster3
Potra2n5c11095	CO-like	305	0.000115976	0.000111482	Cluster3
Potra2n15c28673	CO-like	214	0.000103116	3.67277e-05	Cluster3
Potra2n1c1624	CPP	519	0.000160672	8.54724e-05	Cluster8
Potra2n10c21715	CPP	342	0.000171996	0.0001208	Cluster2
Potra2n1c1527	CPP	161	0.000128945	4.6068e-05	Cluster1
Potra2n8c18060	CPP	115	6.09366e-05	1.90424e-05	Cluster4
Potra2n18c32560	CPP	72	2.66725e-05	1.75086e-05	Cluster1
Potra2n13c25964	CPP	66	3.402e-05	1.70297e-05	Cluster1
Potra2n6c13912	CPP	59	2.17431e-05	1.21025e-05	Cluster1
Potra2n18c32900	CPP	58	2.17216e-05	1.60066e-05	Cluster7
Potra2n18c32991	CPP	57	1.03058e-05	1.40876e-05	Cluster1
Potra2n8c18067	CPP	54	3.59699e-05	1.90246e-05	Cluster4
Potra2n6c13093	CPP	31	8.54659e-06	1.49881e-05	Cluster1
Potra2n5c12411	CPP	22	5.5911e-06	1.01076e-05	Cluster6
Potra2n5c11769	DBB	303	0.000127901	7.86299e-05	Cluster4
Potra2n9c19026	DBB	257	5.55015e-05	0.000234292	Cluster3
Potra2n7c16505	DBB	255	2.20406e-05	0.000212547	Cluster3
Potra2n11c22935	DBB	174	3.78328e-05	7.91683e-05	Cluster3
Potra2n1c3352	DBB	114	9.49908e-05	2.72732e-05	Cluster2
Potra2n672s36361	DBB	114	7.49872e-05	1.91001e-05	Cluster4
Potra2n4c9884	DBB	112	1.36157e-05	6.26925e-05	Cluster3
Potra2n5c10744	DBB	85	3.80289e-05	2.43514e-05	Cluster3
Potra2n9c19047	DBB	81	3.93171e-05	1.33166e-05	Cluster1
Potra2n7c15540	DBB	81	9.14758e-07	9.55375e-05	Cluster3
Potra2n11c22727	DBB	76	1.16555e-05	4.91217e-05	Cluster3
Potra2n2c6190	DBB	32	8.00515e-06	1.45095e-05	Cluster5
Potra2n16c29873	Dof	410	0.000637219	8.03876e-05	Cluster1
Potra2n5c11492	Dof	409	0.000422711	6.19642e-05	Cluster1
Potra2n10c20949	Dof	336	7.68704e-05	0.000139178	Cluster3
Potra2n4c9546	Dof	279	1.58671e-05	0.000258573	Cluster3
Potra2n17c31186	Dof	275	8.05143e-05	0.000104651	Cluster3
Potra2n9c19872	Dof	225	0.000126197	3.84612e-05	Cluster8
Potra2n394s35532	Dof	218	2.49944e-05	0.000131415	Cluster3
Potra2n14c26600	Dof	213	8.74205e-05	8.3577e-05	Cluster2
Potra2n8c17106	Dof	212	4.95287e-05	3.10666e-05	Cluster8
Potra2n8c17403	Dof	210	5.6079e-06	0.000248489	Cluster3
Potra2n12c24404	Dof	175	6.32468e-05	4.73532e-05	Cluster8
Potra2n2c5230	Dof	173	0.00016499	6.4744e-05	Cluster2
Potra2n1c2062	Dof	168	5.33465e-05	3.4594e-05	Cluster8
Potra2n14c27144	Dof	163	7.36908e-05	6.16042e-05	Cluster6
Potra2n7c16311	Dof	146	0.000122303	3.58262e-05	Cluster2
Potra2n11c23315	Dof	137	8.1672e-05	3.25017e-05	Cluster1
Potra2n4c8804	Dof	125	0.000148699	3.48886e-05	Cluster5
Potra2n4c8926	Dof	121	9.54655e-05	2.5362e-05	Cluster1
Potra2n12c23811	Dof	114	7.59409e-05	3.53548e-05	Cluster7
Potra2n10c20596	Dof	102	5.97502e-05	2.34368e-05	Cluster1
Potra2n4c8740	Dof	94	0.000110966	2.30302e-05	Cluster3
Potra2n6c14608	Dof	90	4.66345e-05	2.93745e-05	Cluster1
Potra2n15c28529	Dof	89	4.26423e-05	2.1318e-05	Cluster8
Potra2n203s34938	Dof	86	9.04254e-05	2.31869e-05	Cluster2
Potra2n2c4829	Dof	85	2.22469e-05	1.70751e-05	Cluster2
Potra2n1c710	Dof	83	5.22251e-05	2.54754e-05	Cluster3
Potra2n15c28772	Dof	75	2.03135e-05	1.52235e-05	Cluster3
Potra2n3c7191	Dof	73	1.74315e-05	2.94337e-05	Cluster5
Potra2n7c16131	Dof	71	3.8095e-05	1.69011e-05	Cluster1
Potra2n5c11165	Dof	69	4.72186e-05	1.53013e-05	Cluster1
Potra2n12c24197	Dof	64	2.10086e-05	2.08028e-05	Cluster6
Potra2n5c11639	Dof	63	3.20649e-05	1.56105e-05	Cluster2
Potra2n3c8126	Dof	62	2.51932e-05	1.55279e-05	Cluster1
Potra2n11c23311	Dof	62	2.05587e-05	1.65323e-05	Cluster7
Potra2n19c34024	Dof	56	4.48379e-05	1.60675e-05	Cluster7
Potra2n11c23371	Dof	55	3.17227e-05	2.14479e-05	Cluster7
Potra2n11c23230	Dof	44	1.59453e-05	1.76838e-05	Cluster1
Potra2n13c25696	Dof	39	1.2908e-05	2.16426e-05	Cluster3
Potra2n5c11633	Dof	36	1.60953e-05	1.10353e-05	Cluster2
Potra2n15c29140	Dof	34	1.22468e-05	9.46716e-06	Cluster3
Potra2n4c8808	Dof	31	1.26787e-05	1.2946e-05	Cluster3
Potra2n12c24354	E2F/DP	73	2.97727e-05	1.67766e-05	Cluster1
Potra2n16c30120	E2F/DP	60	3.85902e-05	1.89022e-05	Cluster7
Potra2n4c10173	E2F/DP	53	1.76553e-05	1.142e-05	Cluster1
Potra2n9c18705	E2F/DP	49	1.31832e-05	1.74932e-05	Cluster1
Potra2n15c28590	E2F/DP	45	3.48918e-05	1.99971e-05	Cluster1
Potra2n2c6231	E2F/DP	36	9.32435e-06	1.07985e-05	Cluster6
Potra2n16c29904	E2F/DP	32	1.75393e-05	1.40337e-05	Cluster5
Potra2n6c14223	E2F/DP	23	1.051e-05	1.06699e-05	Cluster5
Potra2n6c13528	E2F/DP	21	1.2049e-05	1.02889e-05	Cluster3
Potra2n10c20181	EIL	304	0.00033252	9.3216e-05	Cluster6
Potra2n9c18729	EIL	254	0.000231153	7.46766e-05	Cluster6
Potra2n1c127	EIL	105	8.21918e-05	2.54378e-05	Cluster6
Potra2n3c6595	EIL	84	4.73812e-05	1.89291e-05	Cluster1
Potra2n3c6594	EIL	50	1.52335e-05	1.31387e-05	Cluster1
Potra2n8c17230	ELF4-like	407	0.000333139	0.00014315	Cluster3
Potra2n6c13248	ELF-like	173	7.87263e-06	0.000146747	Cluster3
Potra2n3c7834	ERF	353	2.08793e-05	4.12976e-05	Cluster8
Potra2n5c11291	ERF	311	0.000195308	5.13e-05	Cluster1
Potra2n9c18829	ERF	295	0.000208926	3.92746e-05	Cluster1
Potra2n5c11289	ERF	293	0.000136194	4.11003e-05	Cluster8
Potra2n3c8133	ERF	292	0.000161094	3.71626e-05	Cluster1
Potra2n1c1598	ERF	280	8.13464e-05	4.14164e-05	Cluster1
Potra2n3c6497	ERF	265	0.00014011	4.18972e-05	Cluster1
Potra2n9c19227	ERF	263	0.000177467	5.64666e-05	Cluster6
Potra2n19c33749	ERF	247	0.000264348	6.50217e-05	Cluster1
Potra2n1c1438	ERF	247	0.000304294	8.29751e-05	Cluster3
Potra2n5c11113	ERF	247	8.14424e-05	5.14129e-05	Cluster6
Potra2n14c27132	ERF	244	0.00029031	7.38889e-05	Cluster6
Potra2n10c22291	ERF	238	4.81217e-05	6.99462e-05	Cluster4
Potra2n6c13400	ERF	233	0.000305294	4.71628e-05	Cluster1
Potra2n6c14920	ERF	233	0.000269987	5.40717e-05	Cluster1
Potra2n7c15962	ERF	226	0.000227268	4.88261e-05	Cluster1
Potra2n14c26684	ERF	225	0.00028075	5.13288e-05	Cluster6
Potra2n8c18345	ERF	224	0.000226064	3.84819e-05	Cluster1
Potra2n4c8818	ERF	221	0.000161506	5.47233e-05	Cluster6
Potra2n5c10852	ERF	217	0.00018363	3.44235e-05	Cluster1
Potra2n19c34077	ERF	214	0.000238423	4.08255e-05	Cluster1
Potra2n3c7136	ERF	214	0.000166927	7.0582e-05	Cluster6
Potra2n2c5554	ERF	210	0.000187492	6.33288e-05	Cluster6
Potra2n3c7820	ERF	195	0.00011828	3.58309e-05	Cluster8
Potra2n2c5129	ERF	190	9.93666e-05	4.74883e-05	Cluster8
Potra2n2c5640	ERF	186	0.000178547	2.80238e-05	Cluster1
Potra2n5c10853	ERF	183	0.000235661	2.87429e-05	Cluster1
Potra2n18c33075	ERF	182	0.000108541	6.12767e-05	Cluster2
Potra2n13c25436	ERF	180	0.00012116	2.97529e-05	Cluster4
Potra2n4c9699	ERF	180	0.000163897	5.15161e-05	Cluster6
Potra2n6c14086	ERF	179	0.000182776	3.63793e-05	Cluster1
Potra2n8c18167	ERF	178	0.000127034	3.28637e-05	Cluster1
Potra2n2c4847	ERF	177	2.79121e-05	2.94092e-05	Cluster1
Potra2n3c7035	ERF	176	0.000155964	2.40413e-05	Cluster1
Potra2n13c25445	ERF	176	0.000160132	4.93247e-05	Cluster6
Potra2n2c4582	ERF	160	7.763e-05	8.24142e-05	Cluster3
Potra2n19c33278	ERF	159	0.000124519	7.64144e-05	Cluster6
Potra2n17c31814	ERF	156	7.72645e-05	3.68033e-05	Cluster4
Potra2n1c3816	ERF	154	1.23379e-05	2.62584e-05	Cluster1
Potra2n8c17439	ERF	148	6.48025e-05	2.06995e-05	Cluster1
Potra2n2c5831	ERF	148	0.000120445	5.32211e-05	Cluster5
Potra2n5c10850	ERF	148	0.000128148	3.08485e-05	Cluster6
Potra2n1c766	ERF	138	7.76144e-05	2.79764e-05	Cluster8
Potra2n14c27085	ERF	136	8.14301e-05	2.74347e-05	Cluster1
Potra2n6c15202	ERF	132	7.99798e-05	3.81721e-05	Cluster1
Potra2n3c7800	ERF	130	3.37928e-05	3.20248e-05	Cluster6
Potra2n6c14085	ERF	130	8.33326e-05	2.18764e-05	Cluster6
Potra2n2c6089	ERF	125	0.000134304	2.81356e-05	Cluster6
Potra2n3c7238	ERF	120	9.64407e-05	2.70522e-05	Cluster1
Potra2n10c20778	ERF	118	0.00010264	3.40478e-05	Cluster1
Potra2n13c25435	ERF	118	9.60395e-05	3.28718e-05	Cluster1
Potra2n18c33011	ERF	113	0.000125103	2.99934e-05	Cluster6
Potra2n16c29403	ERF	112	8.78273e-05	2.41136e-05	Cluster1
Potra2n900s36884	ERF	112	6.65132e-05	2.07884e-05	Cluster1
Potra2n6c12995	ERF	111	7.71763e-05	1.99679e-05	Cluster2
Potra2n1c1362	ERF	103	6.41756e-05	3.00328e-05	Cluster1
Potra2n1c937	ERF	101	4.97243e-05	3.40901e-05	Cluster1
Potra2n1c788	ERF	98	7.47947e-05	2.80825e-05	Cluster1
Potra2n19c33808	ERF	97	4.3839e-05	2.05801e-05	Cluster1
Potra2n19c34263	ERF	97	5.18974e-05	2.18161e-05	Cluster1
Potra2n6c14416	ERF	97	6.31257e-05	3.31567e-05	Cluster1
Potra2n1c1345	ERF	97	1.65278e-05	3.84586e-05	Cluster6
Potra2n3c7404	ERF	96	3.73257e-05	1.56896e-05	Cluster1
Potra2n12c24823	ERF	95	7.19336e-05	2.83301e-05	Cluster1
Potra2n5c11364	ERF	94	5.76801e-05	2.16348e-05	Cluster7
Potra2n16c30404	ERF	93	6.11407e-05	2.14275e-05	Cluster1
Potra2n11c23270	ERF	92	5.57958e-05	2.45309e-05	Cluster6
Potra2n18c32911	ERF	92	6.88125e-05	2.42488e-05	Cluster6
Potra2n2c4188	ERF	91	7.68455e-05	2.71772e-05	Cluster1
Potra2n6c13071	ERF	91	8.43075e-05	2.46511e-05	Cluster1
Potra2n7c15915	ERF	91	0.000121417	3.24215e-05	Cluster3
Potra2n1c541	ERF	89	4.59087e-05	2.01231e-05	Cluster1
Potra2n13c25101	ERF	88	7.36993e-05	2.91623e-05	Cluster1
Potra2n7c16238	ERF	88	3.11783e-05	1.46119e-05	Cluster1
Potra2n5c10884	ERF	87	4.68299e-05	1.91047e-05	Cluster1
Potra2n11c23302	ERF	87	7.85559e-05	2.33459e-05	Cluster4
Potra2n19c33706	ERF	86	5.43253e-05	2.17843e-05	Cluster1
Potra2n1c1648	ERF	86	4.67156e-05	2.33244e-05	Cluster1
Potra2n15c29002	ERF	85	7.20023e-05	1.90163e-05	Cluster3
Potra2n12c23983	ERF	83	8.2163e-05	2.55393e-05	Cluster2
Potra2n2c5283	ERF	80	1.94934e-05	3.73627e-05	Cluster5
Potra2n14c27376	ERF	78	3.85024e-05	3.8374e-05	Cluster3
Potra2n14c26758	ERF	76	6.21952e-05	1.77511e-05	Cluster1
Potra2n14c26504	ERF	75	2.16816e-05	5.18062e-05	Cluster5
Potra2n18c32534	ERF	75	2.63297e-05	2.15829e-05	Cluster8
Potra2n19c33433	ERF	71	4.05487e-05	1.82185e-05	Cluster1
Potra2n19c33705	ERF	70	4.77656e-05	1.92229e-05	Cluster1
Potra2n3c6864	ERF	70	4.8335e-05	2.2868e-05	Cluster2
Potra2n5c12161	ERF	69	6.96605e-05	1.55126e-05	Cluster1
Potra2n18c32875	ERF	68	3.9008e-05	2.11138e-05	Cluster3
Potra2n15c28728	ERF	67	3.27228e-05	1.81573e-05	Cluster1
Potra2n12c24633	ERF	66	5.03971e-05	2.23991e-05	Cluster1
Potra2n3c7897	ERF	66	3.5806e-05	2.76601e-05	Cluster7
Potra2n741s36648	ERF	65	3.75712e-05	2.00976e-05	Cluster1
Potra2n14c26683	ERF	65	3.59466e-05	2.01856e-05	Cluster6
Potra2n12c24822	ERF	64	2.81785e-05	1.85545e-05	Cluster1
Potra2n6c13894	ERF	62	1.64274e-05	1.30543e-05	Cluster1
Potra2n14c26925	ERF	60	2.97712e-05	1.86507e-05	Cluster1
Potra2n1c644	ERF	58	2.59213e-05	1.75339e-05	Cluster6
Potra2n6c13204	ERF	58	5.09168e-05	1.82439e-05	Cluster6
Potra2n15c28051	ERF	57	3.95202e-05	1.45298e-05	Cluster1
Potra2n17c31159	ERF	57	3.91334e-05	1.77407e-05	Cluster1
Potra2n1c390	ERF	57	1.55487e-05	1.66939e-05	Cluster1
Potra2n4c8816	ERF	57	3.14464e-05	1.45423e-05	Cluster2
Potra2n8c18558	ERF	55	2.46271e-05	1.23208e-05	Cluster1
Potra2n5c12062	ERF	54	2.97353e-05	1.52858e-05	Cluster8
Potra2n1c2725	ERF	53	1.6018e-05	1.49465e-05	Cluster1
Potra2n1c646	ERF	53	6.15955e-05	1.88341e-05	Cluster6
Potra2n18c32848	ERF	52	2.18501e-05	1.68643e-05	Cluster1
Potra2n6c14084	ERF	52	1.7357e-05	1.43752e-05	Cluster1
Potra2n11c22843	ERF	52	2.31951e-05	1.63218e-05	Cluster3
Potra2n1c1346	ERF	52	2.7064e-05	1.58392e-05	Cluster6
Potra2n3c8021	ERF	51	1.90793e-05	1.42089e-05	Cluster1
Potra2n1c3138	ERF	49	2.6906e-05	1.68915e-05	Cluster7
Potra2n13c25789	ERF	49	1.52228e-05	1.21498e-05	Cluster8
Potra2n13c24952	ERF	48	2.45647e-05	1.35728e-05	Cluster6
Potra2n3c7050	ERF	46	1.05397e-05	1.28993e-05	Cluster1
Potra2n3c7265	ERF	46	3.3714e-05	1.91924e-05	Cluster1
Potra2n13c25901	ERF	44	7.50646e-06	1.39214e-05	Cluster1
Potra2n2c6090	ERF	44	1.74195e-05	1.97311e-05	Cluster1
Potra2n17c31501	ERF	43	1.22985e-05	1.99107e-05	Cluster1
Potra2n7c15468	ERF	42	2.59736e-05	1.54492e-05	Cluster1
Potra2n11c23301	ERF	40	2.29588e-05	1.1855e-05	Cluster6
Potra2n2c6054	ERF	35	1.03482e-05	1.49946e-05	Cluster1
Potra2n1c42	ERF	34	1.36019e-05	1.5274e-05	Cluster5
Potra2n2c6091	ERF	34	3.24665e-05	1.53244e-05	Cluster6
Potra2n4c8857	ERF	32	1.27005e-05	1.38597e-05	Cluster1
Potra2n4c8859	ERF	32	1.45693e-05	1.02772e-05	Cluster1
Potra2n6c14646	ERF	32	1.3763e-05	1.15139e-05	Cluster1
Potra2n1c3461	ERF	31	8.45102e-06	1.68434e-05	Cluster6
Potra2n10c20805	ERF	26	5.93551e-06	1.28896e-05	Cluster1
Potra2n2c4898	ERF	19	1.69541e-06	1.05327e-05	Cluster1
Potra2n5c11580	ERF	8	1.62618e-07	7.69041e-06	Cluster1
Potra2n6c15210	FAR1	450	0.000170191	6.85868e-05	Cluster8
Potra2n17c31646	FAR1	177	0.000161873	4.251e-05	Cluster1
Potra2n6c13045	FAR1	105	7.35022e-05	2.40917e-05	Cluster1
Potra2n5c12633	FAR1	103	7.92658e-05	2.8936e-05	Cluster1
Potra2n14c27844	FAR1	101	6.9217e-05	2.69456e-05	Cluster1
Potra2n5c10516	FAR1	99	5.45393e-05	2.03512e-05	Cluster1
Potra2n3c8147	FAR1	95	5.29613e-05	2.4638e-05	Cluster1
Potra2n2c4256	FAR1	94	9.11811e-05	3.30109e-05	Cluster1
Potra2n16c29770	FAR1	90	5.7738e-05	2.28871e-05	Cluster1
Potra2n10c22158	FAR1	87	3.87787e-05	2.23908e-05	Cluster1
Potra2n6c15070	FAR1	86	4.94084e-05	1.64445e-05	Cluster1
Potra2n17c31633	FAR1	85	5.3421e-05	2.14883e-05	Cluster1
Potra2n4c10142	FAR1	85	3.23207e-05	1.703e-05	Cluster1
Potra2n6c15071	FAR1	77	5.7751e-05	2.01273e-05	Cluster1
Potra2n4c10409	FAR1	69	2.37e-05	1.57365e-05	Cluster1
Potra2n14c27757	FAR1	68	3.26719e-05	2.09832e-05	Cluster1
Potra2n17c31639	FAR1	67	3.49619e-05	1.67963e-05	Cluster1
Potra2n9c18736	FAR1	67	4.85329e-05	1.62454e-05	Cluster7
Potra2n16c29771	FAR1	66	2.40479e-05	1.60438e-05	Cluster8
Potra2n8c17308	FAR1	65	2.10276e-05	1.6084e-05	Cluster1
Potra2n7c15549	FAR1	63	3.16975e-05	1.89876e-05	Cluster1
Potra2n8c17608	FAR1	62	1.71072e-05	1.01999e-05	Cluster1
Potra2n2c4602	FAR1	60	3.63843e-05	1.97044e-05	Cluster1
Potra2n16c29400	FAR1	58	3.23274e-05	2.03311e-05	Cluster1
Potra2n12c24852	FAR1	56	2.5625e-05	1.72871e-05	Cluster1
Potra2n17c31133	FAR1	55	2.89851e-05	1.5405e-05	Cluster1
Potra2n8c16726	FAR1	50	2.46388e-05	1.93879e-05	Cluster1
Potra2n7c15548	FAR1	47	1.49587e-05	1.51889e-05	Cluster1
Potra2n8c18466	FAR1	46	2.55145e-05	1.81528e-05	Cluster1
Potra2n16c29397	FAR1	46	2.43583e-05	1.67352e-05	Cluster7
Potra2n1c1750	FAR1	45	4.62692e-05	1.3568e-05	Cluster5
Potra2n7c15550	FAR1	41	1.51893e-05	1.1574e-05	Cluster3
Potra2n14c27841	FAR1	37	8.74598e-06	1.43346e-05	Cluster1
Potra2n11c22565	FAR1	34	1.19236e-05	1.14485e-05	Cluster5
Potra2n15c28028	FAR1	29	1.4111e-05	1.23058e-05	Cluster2
Potra2n3c7522	FAR1	28	2.67073e-05	1.16743e-05	Cluster5
Potra2n16c29294	FAR1	27	8.95273e-06	1.45104e-05	Cluster1
Potra2n3c6609	FAR1	27	1.82511e-05	1.52081e-05	Cluster7
Potra2n3c8149	FAR1	25	8.47777e-06	1.17702e-05	Cluster7
Potra2n6c15205	FAR1	21	1.34425e-05	1.33618e-05	Cluster7
Potra2n7c15545	FAR1	12	2.39038e-06	8.48967e-06	Cluster1
Potra2n4c10247	FAR1	4	1.27223e-07	6.64108e-06	Cluster5
Potra2n15c28934	G2-like	492	7.44173e-05	7.69033e-05	Cluster8
Potra2n17c31806	G2-like	435	0.000202624	8.66946e-05	Cluster8
Potra2n10c20786	G2-like	414	8.4473e-05	9.83385e-05	Cluster8
Potra2n17c30744	G2-like	409	0.000166666	6.35914e-05	Cluster8
Potra2n2c5913	G2-like	376	0.000112942	5.84651e-05	Cluster8
Potra2n1c2112	G2-like	370	9.5181e-05	0.000197775	Cluster3
Potra2n19c34112	G2-like	345	4.85469e-05	9.39857e-05	Cluster8
Potra2n4c8936	G2-like	337	8.28825e-05	5.30674e-05	Cluster8
Potra2n10c21575	G2-like	329	0.000107899	6.05428e-05	Cluster8
Potra2n10c20892	G2-like	325	0.000136404	7.30415e-05	Cluster8
Potra2n18c32648	G2-like	299	0.00011497	6.86378e-05	Cluster8
Potra2n12c24071	G2-like	296	3.145e-05	8.55611e-05	Cluster8
Potra2n4c9160	G2-like	268	0.000106205	5.43092e-05	Cluster8
Potra2n8c17260	G2-like	241	0.000154647	2.93881e-05	Cluster8
Potra2n16c29671	G2-like	228	0.000332297	6.55266e-05	Cluster2
Potra2n3c7647	G2-like	216	7.02024e-05	3.26297e-05	Cluster8
Potra2n8c17353	G2-like	196	2.73262e-05	6.96586e-05	Cluster8
Potra2n7c16617	G2-like	190	0.000191071	6.08697e-05	Cluster6
Potra2n6c13667	G2-like	183	0.000154402	2.58167e-05	Cluster1
Potra2n1c1172	G2-like	179	6.35758e-05	3.60997e-05	Cluster8
Potra2n6c13944	G2-like	160	5.03091e-05	2.42341e-05	Cluster8
Potra2n13c25861	G2-like	139	8.90902e-05	3.61183e-05	Cluster6
Potra2n10c21293	MYB-HB-like	135	0.000160124	3.56908e-05	Cluster6
Potra2n13c25760	G2-like	131	7.8746e-05	2.67867e-05	Cluster8
Potra2n14c27798	G2-like	125	9.70995e-05	2.96195e-05	Cluster1
Potra2n9c19181	G2-like	122	0.000169389	3.17973e-05	Cluster2
Potra2n16c29499	G2-like	114	8.46848e-05	3.26022e-05	Cluster3
Potra2n16c29670	MYB-HB-like	109	2.70275e-05	5.52289e-05	Cluster5
Potra2n8c17934	G2-like	106	5.11036e-05	2.70594e-05	Cluster8
Potra2n16c29239	G2-like	86	7.97904e-05	2.53743e-05	Cluster7
Potra2n2c4080	G2-like	80	3.19774e-05	1.76684e-05	Cluster1
Potra2n16c30321	G2-like	75	5.39228e-05	1.8578e-05	Cluster7
Potra2n4c9735	G2-like	72	1.96527e-05	1.573e-05	Cluster2
Potra2n5c11013	G2-like	71	4.18302e-05	1.53898e-05	Cluster8
Potra2n1c2734	G2-like	67	2.63946e-05	1.76859e-05	Cluster1
Potra2n11c23513	G2-like	67	4.08142e-05	2.83934e-05	Cluster2
Potra2n4c8489	G2-like	66	2.50414e-05	1.67824e-05	Cluster1
Potra2n6c15386	G2-like	66	2.30202e-05	1.64479e-05	Cluster7
Potra2n3c7730	G2-like	65	3.49723e-05	1.56923e-05	Cluster7
Potra2n5c11630	G2-like	63	2.92049e-05	1.44687e-05	Cluster6
Potra2n2c5225	G2-like	61	2.37465e-05	2.12693e-05	Cluster1
Potra2n14c26314	G2-like	57	3.52479e-05	1.7417e-05	Cluster5
Potra2n19c34198	G2-like	52	3.11531e-05	1.49822e-05	Cluster7
Potra2n203s34956	G2-like	51	4.12771e-05	1.82471e-05	Cluster6
Potra2n7c15477	G2-like	50	1.83827e-05	1.51475e-05	Cluster6
Potra2n11c23624	G2-like	46	1.58018e-05	1.70551e-05	Cluster1
Potra2n3c7619	G2-like	45	1.68558e-05	2.02827e-05	Cluster1
Potra2n17c31490	G2-like	44	2.51726e-05	1.80282e-05	Cluster3
Potra2n10c20947	G2-like	41	2.41405e-05	2.00546e-05	Cluster3
Potra2n14c26606	G2-like	41	2.6496e-05	1.56043e-05	Cluster5
Potra2n6c15112	G2-like	20	5.68789e-06	1.30842e-05	Cluster1
Potra2n14c26785	GATA	516	0.000115805	7.79723e-05	Cluster8
Potra2n555s35933	GATA	289	0.000261629	5.70446e-05	Cluster1
Potra2n5c11764	GATA	283	0.000233864	5.42269e-05	Cluster8
Potra2n18c32797	GATA	274	8.62388e-05	5.14104e-05	Cluster8
Potra2n8c16954	GATA	148	0.000121577	4.8676e-05	Cluster5
Potra2n5c11711	GATA	137	5.66549e-05	2.05626e-05	Cluster8
Potra2n7c16418	GATA	135	9.16408e-05	2.11143e-05	Cluster1
Potra2n1c437	GATA	134	0.000112703	3.12917e-05	Cluster5
Potra2n10c20146	GATA	123	0.000111712	2.65612e-05	Cluster1
Potra2n1c1655	GATA	119	8.56644e-05	3.6825e-05	Cluster1
Potra2n4c10270	GATA	116	9.07548e-05	4.71012e-05	Cluster5
Potra2n10c22352	GATA	112	7.53555e-05	2.22467e-05	Cluster1
Potra2n13c25764	GATA	112	6.05995e-05	2.28101e-05	Cluster8
Potra2n4c9874	GATA	109	8.11747e-05	2.61066e-05	Cluster3
Potra2n202s34926	GATA	108	7.97697e-05	3.2377e-05	Cluster1
Potra2n5c12662	GATA	98	6.41847e-05	1.72916e-05	Cluster1
Potra2n2c4597	GATA	97	3.54309e-05	1.79049e-05	Cluster8
Potra2n10c20423	GATA	95	3.74566e-05	4.85015e-05	Cluster5
Potra2n18c32869	GATA	84	5.09219e-05	2.1741e-05	Cluster1
Potra2n2c5411	GATA	81	3.50986e-05	1.45748e-05	Cluster1
Potra2n2c5413	GATA	78	6.74772e-05	2.17204e-05	Cluster5
Potra2n5c11468	GATA	68	3.57887e-05	1.88853e-05	Cluster5
Potra2n6c13214	GATA	43	1.32038e-05	1.04292e-05	Cluster7
Potra2n17c31599	GATA	38	7.03028e-06	1.44673e-05	Cluster1
Potra2n3c6911	GATA	34	2.67371e-05	1.50756e-05	Cluster6
Potra2n8c18570	GATA	33	1.24276e-05	1.0517e-05	Cluster6
Potra2n14c27357	GATA	32	9.44534e-06	1.46679e-05	Cluster1
Potra2n19c34109	GATA	32	1.11532e-05	1.20543e-05	Cluster2
Potra2n3c7787	GATA	29	1.07766e-05	1.50358e-05	Cluster5
Potra2n7c16493	GATA	28	5.11638e-06	1.12317e-05	Cluster5
Potra2n7c15667	GATA	26	4.17147e-06	7.41118e-06	Cluster1
Potra2n5c11467	GATA	13	1.00515e-06	8.39312e-06	Cluster1
Potra2n4c9255	GeBP	255	9.08384e-05	5.64471e-05	Cluster4
Potra2n7c15630	GeBP	121	9.11988e-05	3.43633e-05	Cluster6
Potra2n1c2272	GeBP	77	4.2169e-05	1.78448e-05	Cluster1
Potra2n9c19342	GeBP	67	3.89369e-05	1.70342e-05	Cluster6
Potra2n1c2560	GeBP	49	3.05574e-05	1.55664e-05	Cluster1
Potra2n4c9127	GRAS	427	0.000148638	0.000115275	Cluster4
Potra2n12c23795	GRAS	411	0.000447949	7.56387e-05	Cluster1
Potra2n17c31676	GRAS	363	2.48063e-05	4.40914e-05	Cluster8
Potra2n197s34862	GRAS	355	5.60929e-05	4.35399e-05	Cluster4
Potra2n15c28204	GRAS	341	0.000383793	7.44909e-05	Cluster1
Potra2n612s36155	GRAS	340	0.000489865	6.97404e-05	Cluster1
Potra2n4c10244	GRAS	305	0.000313787	5.62035e-05	Cluster1
Potra2n6c14318	GRAS	279	0.000208175	5.16321e-05	Cluster8
Potra2n19c33794	GRAS	255	5.27415e-05	3.68535e-05	Cluster1
Potra2n3c7393	GRAS	253	0.000239858	7.87184e-05	Cluster2
Potra2n17c30701	GRAS	242	0.000224114	5.23103e-05	Cluster4
Potra2n16c30574	GRAS	222	3.33306e-05	6.3211e-05	Cluster8
Potra2n1c2835	GRAS	217	0.000297413	4.83564e-05	Cluster1
Potra2n8c17839	GRAS	217	0.00013282	2.96682e-05	Cluster6
Potra2n9c19581	GRAS	213	0.000231479	4.07046e-05	Cluster8
Potra2n1c2444	GRAS	206	0.000250191	3.7893e-05	Cluster1
Potra2n5c11974	GRAS	202	4.9318e-05	2.72192e-05	Cluster8
Potra2n17c30631	GRAS	198	9.67393e-06	0.00012651	Cluster3
Potra2n252s35125	GRAS	192	0.000230636	4.90458e-05	Cluster1
Potra2n1c923	GRAS	188	7.50432e-05	4.67885e-05	Cluster2
Potra2n14c27732	GRAS	188	0.00017217	7.10445e-05	Cluster7
Potra2n6c15244	GRAS	184	0.000153568	0.000135995	Cluster5
Potra2n5c11682	GRAS	178	5.48458e-05	3.81546e-05	Cluster8
Potra2n17c31604	GRAS	150	0.000215516	3.39469e-05	Cluster8
Potra2n7c16368	GRAS	149	0.00013925	3.99611e-05	Cluster8
Potra2n17c30832	GRAS	147	0.000274873	4.63024e-05	Cluster10
Potra2n1c1486	GRAS	129	4.80598e-05	4.38707e-05	Cluster6
Potra2n5c11526	GRAS	128	9.36386e-05	4.29534e-05	Cluster1
Potra2n2c6117	GRAS	116	7.14847e-05	2.87636e-05	Cluster1
Potra2n1405s37047	GRAS	115	4.88629e-05	2.86155e-05	Cluster4
Potra2n7c16400	GRAS	109	3.2063e-05	5.32362e-05	Cluster5
Potra2n7c16166	GRAS	94	6.18408e-05	2.93768e-05	Cluster1
Potra2n5c11699	GRAS	94	3.29063e-05	3.53929e-05	Cluster5
Potra2n16c29407	GRAS	93	7.97954e-05	2.69423e-05	Cluster1
Potra2n17c31624	GRAS	89	4.1323e-05	2.03947e-05	Cluster1
Potra2n1c4019	GRAS	88	6.0917e-05	2.28087e-05	Cluster1
Potra2n7c15514	GRAS	87	6.16904e-05	1.78438e-05	Cluster7
Potra2n3c6649	GRAS	86	3.90853e-05	2.09849e-05	Cluster1
Potra2n1c2094	GRAS	81	9.79187e-05	2.74607e-05	Cluster7
Potra2n2c5747	GRAS	80	5.91293e-05	2.23174e-05	Cluster5
Potra2n10c21474	GRAS	78	3.81882e-05	2.74067e-05	Cluster5
Potra2n514s35861	GRAS	76	6.08157e-05	2.06678e-05	Cluster3
Potra2n7c15524	GRAS	75	5.25451e-05	1.78276e-05	Cluster1
Potra2n10c20626	GRAS	74	3.46134e-05	2.05704e-05	Cluster1
Potra2n5c11151	GRAS	71	8.4081e-05	2.27136e-05	Cluster3
Potra2n17c31623	GRAS	70	4.32615e-05	1.94732e-05	Cluster1
Potra2n16c29457	GRAS	68	5.12837e-05	2.52341e-05	Cluster3
Potra2n5c11185	GRAS	68	2.72585e-05	3.49526e-05	Cluster5
Potra2n2c5635	GRAS	66	3.46781e-05	1.45404e-05	Cluster1
Potra2n1c2095	GRAS	66	1.83628e-05	3.3361e-05	Cluster7
Potra2n13c25319	GRAS	60	3.39699e-05	1.79449e-05	Cluster2
Potra2n4c9243	GRAS	60	4.18394e-05	1.75342e-05	Cluster5
Potra2n9c19700	GRAS	56	5.16276e-05	1.36525e-05	Cluster2
Potra2n9c19842	GRAS	56	3.63206e-05	1.30074e-05	Cluster7
Potra2n2c5117	GRAS	55	3.21952e-05	1.60058e-05	Cluster7
Potra2n16c29311	GRAS	54	2.55239e-05	3.27512e-05	Cluster5
Potra2n3c6652	GRAS	52	2.07573e-05	1.61755e-05	Cluster1
Potra2n3c7514	GRAS	52	2.32133e-05	1.57981e-05	Cluster1
Potra2n13c25514	GRAS	48	4.35077e-05	1.59072e-05	Cluster3
Potra2n1621s37154	GRAS	48	2.38314e-05	1.27802e-05	Cluster5
Potra2n9c19837	GRAS	48	1.15336e-05	2.31926e-05	Cluster5
Potra2n16c29459	GRAS	46	2.23097e-05	1.24906e-05	Cluster3
Potra2n548s35915	GRAS	41	1.19823e-05	9.78477e-06	Cluster1
Potra2n5c11296	GRAS	41	9.81492e-06	1.45212e-05	Cluster1
Potra2n1c1059	GRAS	41	1.25553e-05	1.71203e-05	Cluster2
Potra2n584s36051	GRAS	41	3.21103e-05	1.60413e-05	Cluster5
Potra2n14c26798	GRAS	38	2.22501e-05	1.58133e-05	Cluster2
Potra2n1c2098	GRAS	38	1.64204e-05	1.40009e-05	Cluster5
Potra2n11c22687	GRAS	37	7.78503e-06	1.48603e-05	Cluster1
Potra2n19c33603	GRAS	37	2.09148e-05	1.26087e-05	Cluster3
Potra2n6c14584	GRAS	36	2.61999e-05	1.50879e-05	Cluster5
Potra2n2c5113	GRAS	33	1.35755e-05	1.2635e-05	Cluster5
Potra2n7c16101	GRAS	28	6.26007e-06	1.67016e-05	Cluster3
Potra2n14c26801	GRAS	27	1.53011e-05	1.43859e-05	Cluster3
Potra2n9c19841	GRAS	25	1.56721e-05	1.27797e-05	Cluster1
Potra2n6c15198	GRAS	15	1.7989e-06	9.17363e-06	Cluster1
Potra2n1c971	GRF	276	8.52477e-05	4.15307e-05	Cluster1
Potra2n19c34010	GRF	206	3.15051e-05	3.47906e-05	Cluster1
Potra2n1c1492	GRF	196	4.48647e-05	3.02182e-05	Cluster1
Potra2n7c16585	GRF	156	0.000141122	6.29672e-05	Cluster5
Potra2n6c14049	GRF	130	0.000193197	3.03981e-05	Cluster6
Potra2n15c29167	GRF	120	0.000113	4.03612e-05	Cluster7
Potra2n14c26397	GRF	111	9.8534e-05	2.53695e-05	Cluster1
Potra2n2c5367	GRF	85	6.36697e-05	1.53888e-05	Cluster1
Potra2n14c26874	GRF	78	3.74703e-05	2.59405e-05	Cluster1
Potra2n2c4485	GRF	72	5.77374e-05	1.92701e-05	Cluster6
Potra2n6c14307	GRF	70	4.57861e-05	1.92054e-05	Cluster1
Potra2n3c7613	GRF	68	2.84585e-05	1.50302e-05	Cluster1
Potra2n18c32704	GRF	65	4.44172e-05	2.08425e-05	Cluster1
Potra2n1c1143	GRF	53	1.58397e-05	1.75321e-05	Cluster1
Potra2n1c675	GRF	52	2.69949e-05	1.80765e-05	Cluster1
Potra2n13c25610	GRF	49	3.03358e-05	1.82466e-05	Cluster1
Potra2n12c23713	GRF	47	3.85028e-05	2.67136e-05	Cluster3
Potra2n14c26372	GRF	19	1.16431e-05	1.34971e-05	Cluster3
Potra2n10c22129	HB54	78	5.71874e-05	2.47577e-05	Cluster1
Potra2n5c11659	HB-other	440	0.000139237	8.75729e-05	Cluster4
Potra2n3c7314	HB-other	292	7.50517e-05	6.43275e-05	Cluster4
Potra2n6c13278	HB-other	179	0.000142607	4.73988e-05	Cluster1
Potra2n11c23293	HB-other	173	8.23136e-05	0.000117156	Cluster7
Potra2n17c31802	HB-other	161	9.31841e-05	6.72199e-05	Cluster7
Potra2n14c27808	HB-other	148	0.000104558	7.42132e-05	Cluster6
Potra2n18c33066	HB-other	147	0.000131012	4.34994e-05	Cluster7
Potra2n4c8831	HB-other	140	6.52682e-05	7.76557e-05	Cluster7
Potra2n2c4381	HB-other	133	0.000121147	5.07851e-05	Cluster7
Potra2n2c4410	HB-other	123	8.87311e-05	6.22805e-05	Cluster7
Potra2n5c12690	HB-other	106	0.000111973	2.9214e-05	Cluster5
Potra2n7c15487	HB-other	89	0.00016493	3.99692e-05	Cluster5
Potra2n9c19546	HB-other	87	7.12834e-05	2.15828e-05	Cluster6
Potra2n9c19302	HB-other	85	4.7169e-05	2.04147e-05	Cluster1
Potra2n9c19989	HB-other	84	5.97889e-05	3.60124e-05	Cluster6
Potra2n14c27440	HB-other	80	4.85113e-05	2.50864e-05	Cluster7
Potra2n11c23050	HB-other	69	4.57934e-05	2.00126e-05	Cluster1
Potra2n1c1660	HB-other	50	1.4277e-05	1.10222e-05	Cluster1
Potra2n6c14694	HB-other	50	2.11468e-05	1.28383e-05	Cluster3
Potra2n1c2406	HB-other	47	1.8465e-05	1.63942e-05	Cluster1
Potra2n1c3273	HB-other	44	1.81809e-05	1.30057e-05	Cluster1
Potra2n18c32246	HB-other	44	9.10129e-06	3.00408e-05	Cluster6
Potra2n6c13089	HB-other	39	1.13412e-05	1.36564e-05	Cluster1
Potra2n1c2606	HB-PHD	56	1.94044e-05	1.64796e-05	Cluster1
Potra2n18c32060	HB-PHD	13	3.00551e-06	7.09503e-06	Cluster3
Potra2n14c26907	HD-ZIP	540	9.58227e-05	9.44494e-05	Cluster8
Potra2n2c5025	HD-ZIP	428	9.17315e-05	7.1045e-05	Cluster8
Potra2n15c28006	HD-ZIP	312	4.72559e-05	7.42843e-05	Cluster8
Potra2n7c16365	HD-ZIP	294	0.000360689	5.23095e-05	Cluster1
Potra2n1c3263	HD-ZIP	277	0.000221564	0.000114908	Cluster2
Potra2n4c8590	HD-ZIP	257	5.08695e-05	3.98821e-05	Cluster1
Potra2n6c14729	HD-ZIP	245	0.000301149	6.08716e-05	Cluster1
Potra2n11c22855	HD-ZIP	224	0.00022241	4.99411e-05	Cluster1
Potra2n17c31213	HD-ZIP	211	9.03366e-05	4.84632e-05	Cluster8
Potra2n7c15852	HD-ZIP	190	0.000104709	9.59245e-05	Cluster5
Potra2n18c32866	HD-ZIP	183	0.000154485	0.000111356	Cluster3
Potra2n124s34585	HD-ZIP	176	0.000183419	4.93652e-05	Cluster1
Potra2n2c5500	HD-ZIP	161	8.07149e-05	4.69821e-05	Cluster8
Potra2n3c7649	HD-ZIP	158	0.000141424	4.83329e-05	Cluster1
Potra2n3c7167	HD-ZIP	156	2.65521e-05	2.59826e-05	Cluster1
Potra2n5c11512	HD-ZIP	156	8.78376e-05	2.59666e-05	Cluster8
Potra2n18c32867	HD-ZIP	152	0.000103723	0.000100001	Cluster3
Potra2n2c4363	HD-ZIP	151	0.000112949	3.01646e-05	Cluster1
Potra2n5c12223	HD-ZIP	150	8.51101e-05	7.00939e-05	Cluster5
Potra2n3c8027	HD-ZIP	145	8.12085e-05	0.000118586	Cluster5
Potra2n1c1657	HD-ZIP	142	0.000171399	4.58495e-05	Cluster7
Potra2n15c28644	HD-ZIP	137	5.60976e-05	0.000111217	Cluster5
Potra2n8c17984	HD-ZIP	133	9.12153e-05	2.33471e-05	Cluster8
Potra2n1c3451	HD-ZIP	132	0.000113454	3.15617e-05	Cluster1
Potra2n7c16575	HD-ZIP	116	0.000105197	2.82332e-05	Cluster3
Potra2n16c29769	HD-ZIP	116	3.90845e-05	5.53339e-05	Cluster5
Potra2n1c1174	HD-ZIP	112	5.30613e-05	2.32371e-05	Cluster8
Potra2n8c17826	HD-ZIP	111	6.46157e-05	2.18969e-05	Cluster10
Potra2n9c19925	HD-ZIP	108	7.20181e-05	3.66167e-05	Cluster4
Potra2n12c24036	HD-ZIP	106	7.17843e-05	2.69295e-05	Cluster2
Potra2n10c21634	HD-ZIP	104	6.54074e-05	2.79813e-05	Cluster8
Potra2n492s35805	HD-ZIP	102	8.35056e-05	1.9765e-05	Cluster8
Potra2n7c15491	HD-ZIP	91	5.04702e-05	2.00435e-05	Cluster1
Potra2n2c5385	HD-ZIP	91	3.55344e-05	1.74862e-05	Cluster6
Potra2n1c687	HD-ZIP	88	5.77125e-05	2.18264e-05	Cluster1
Potra2n12c24315	HD-ZIP	85	1.08872e-05	8.1179e-05	Cluster5
Potra2n4c10264	HD-ZIP	84	7.46282e-05	4.15567e-05	Cluster3
Potra2n1c1985	HD-ZIP	82	2.39277e-05	2.7895e-05	Cluster3
Potra2n1c1621	HD-ZIP	78	5.03347e-05	1.60713e-05	Cluster7
Potra2n5c11415	HD-ZIP	74	3.8416e-05	1.69249e-05	Cluster8
Potra2n12c23699	HD-ZIP	70	7.55657e-05	2.55394e-05	Cluster5
Potra2n1c1355	HD-ZIP	69	1.59626e-05	3.1683e-05	Cluster5
Potra2n2c5174	HD-ZIP	66	4.05701e-05	2.03918e-05	Cluster1
Potra2n3c8006	HD-ZIP	66	3.75296e-05	1.86852e-05	Cluster2
Potra2n6c13644	HD-ZIP	65	4.9469e-05	1.68731e-05	Cluster3
Potra2n4c9096	HD-ZIP	61	3.09801e-05	1.79893e-05	Cluster1
Potra2n5c11680	HD-ZIP	50	2.44123e-05	1.64607e-05	Cluster1
Potra2n6c13216	HD-ZIP	50	1.19451e-05	2.43333e-05	Cluster2
Potra2n2c4807	HD-ZIP	49	2.34499e-05	2.31672e-05	Cluster1
Potra2n11c23064	HD-ZIP	47	2.40072e-05	1.64395e-05	Cluster2
Potra2n3c7815	HD-ZIP	46	3.28134e-05	1.59747e-05	Cluster6
Potra2n8c18420	HD-ZIP	38	1.9454e-05	1.37186e-05	Cluster7
Potra2n14c26668	HD-ZIP	32	7.24786e-06	1.41854e-05	Cluster1
Potra2n10c21453	HD-ZIP	30	1.61209e-05	1.62946e-05	Cluster7
Potra2n15c28907	HD-ZIP	21	6.31894e-06	1.15101e-05	Cluster7
Potra2n18c32104	HD-ZIP	20	1.09247e-05	9.6144e-06	Cluster3
Potra2n6c13990	HRT-like	65	3.48507e-05	1.87405e-05	Cluster1
Potra2n1c2782	HSF	295	0.000250572	0.000101237	Cluster7
Potra2n7c16268	HSF	284	0.000193711	0.000117577	Cluster5
Potra2n2c5274	HSF	208	3.93572e-05	0.000108896	Cluster2
Potra2n14c26526	HSF	207	0.000111001	6.73843e-05	Cluster2
Potra2n18c32582	HSF	202	4.40795e-05	9.59295e-05	Cluster3
Potra2n11c23341	HSF	181	0.00021123	3.72028e-05	Cluster1
Potra2n1c908	HSF	128	0.000134013	6.04895e-05	Cluster3
Potra2n10c21729	HSF	122	4.58616e-05	3.55303e-05	Cluster3
Potra2n6c13324	HSF	116	0.000172996	5.09328e-05	Cluster3
Potra2n10c21527	HSF	101	4.99953e-05	2.31468e-05	Cluster1
Potra2n16c29749	HSF	101	6.92318e-05	2.69492e-05	Cluster4
Potra2n12c24871	HSF	94	5.26204e-05	6.42992e-05	Cluster5
Potra2n15c28011	HSF	80	4.92147e-05	2.09697e-05	Cluster1
Potra2n1c2394	HSF	79	5.35102e-05	2.26595e-05	Cluster2
Potra2n9c19511	HSF	75	1.39984e-05	2.69902e-05	Cluster3
Potra2n2c6007	HSF	68	3.94742e-05	2.16641e-05	Cluster6
Potra2n17c31431	HSF	60	3.11016e-05	1.62353e-05	Cluster1
Potra2n8c18082	HSF	60	3.0402e-05	2.36077e-05	Cluster1
Potra2n4c8771	HSF	59	5.67077e-05	1.91634e-05	Cluster1
Potra2n13c25592	HSF	57	2.2596e-05	1.7495e-05	Cluster1
Potra2n1c1185	HSF	49	2.08934e-05	1.48969e-05	Cluster1
Potra2n3c7659	HSF	43	1.13067e-05	1.36807e-05	Cluster4
Potra2n14c27529	HSF	40	1.10142e-05	1.47866e-05	Cluster1
Potra2n5c10929	HSF	39	1.52096e-05	1.12942e-05	Cluster3
Potra2n6c14973	HSF	38	9.45147e-06	1.65589e-05	Cluster6
Potra2n11c23182	HSF	35	2.54399e-05	1.43228e-05	Cluster1
Potra2n4c8980	HSF	24	5.64534e-06	1.08567e-05	Cluster5
Potra2n6c14302	HSF	23	5.59407e-06	1.20668e-05	Cluster3
Potra2n8c17886	HSF	17	6.04235e-06	8.33595e-06	Cluster6
Potra2n6c14005	HSF	11	3.75217e-06	9.19727e-06	Cluster6
Potra2n15c28632	LBD	388	0.000662218	6.83934e-05	Cluster1
Potra2n8c16697	LBD	370	0.000469626	5.85041e-05	Cluster1
Potra2n15c28472	LBD	261	0.000295729	6.49778e-05	Cluster1
Potra2n9c19330	LBD	252	0.000117397	5.48774e-05	Cluster6
Potra2n13c25720	LBD	251	0.000224541	5.00708e-05	Cluster1
Potra2n10c20646	LBD	237	0.000409734	4.94829e-05	Cluster1
Potra2n15c28057	LBD	223	0.000155099	4.57309e-05	Cluster1
Potra2n15c28054	LBD	164	2.04332e-05	3.10125e-05	Cluster1
Potra2n2c6076	LBD	155	0.000139196	3.472e-05	Cluster1
Potra2n10c20148	LBD	147	0.000148515	4.03204e-05	Cluster5
Potra2n14c26863	LBD	147	0.000178662	8.21482e-05	Cluster5
Potra2n4c9349	LBD	136	0.000227823	5.49802e-05	Cluster5
Potra2n17c30923	LBD	130	0.000224012	4.91232e-05	Cluster3
Potra2n5c11945	LBD	121	0.000140387	2.80946e-05	Cluster1
Potra2n8c16999	LBD	119	6.0301e-05	3.62755e-05	Cluster8
Potra2n8c17272	LBD	116	7.9195e-05	1.9573e-05	Cluster1
Potra2n1c3032	LBD	115	9.72169e-05	2.75916e-05	Cluster1
Potra2n10c21333	LBD	107	4.74869e-05	2.73438e-05	Cluster1
Potra2n10c20797	LBD	106	7.36709e-05	2.36867e-05	Cluster1
Potra2n1c2461	LBD	106	6.46592e-05	2.50061e-05	Cluster1
Potra2n12c24188	LBD	86	7.11159e-05	3.39107e-05	Cluster1
Potra2n19c33310	LBD	85	7.24195e-05	1.99599e-05	Cluster1
Potra2n10c20471	LBD	80	4.89689e-05	2.10965e-05	Cluster1
Potra2n7c16165	LBD	79	8.41988e-05	2.95536e-05	Cluster5
Potra2n3c7150	LBD	78	5.93905e-05	1.87281e-05	Cluster2
Potra2n5c11628	LBD	75	6.17503e-05	2.90629e-05	Cluster7
Potra2n14c26447	LBD	70	3.40022e-05	2.34177e-05	Cluster3
Potra2n2c5076	LBD	69	4.11547e-05	1.50615e-05	Cluster5
Potra2n13c24976	LBD	65	9.83463e-06	3.88592e-05	Cluster5
Potra2n2c6075	LBD	63	2.08162e-05	1.45777e-05	Cluster1
Potra2n9c19593	LBD	56	2.17988e-05	1.61594e-05	Cluster1
Potra2n443s35694	LBD	54	3.39608e-05	1.56262e-05	Cluster1
Potra2n2c5075	LBD	51	3.38577e-05	2.00911e-05	Cluster5
Potra2n203s34957	LBD	45	1.09769e-05	1.95627e-05	Cluster4
Potra2n7c16060	LBD	41	2.59555e-05	1.63619e-05	Cluster8
Potra2n5c10864	LBD	40	4.35578e-05	1.4978e-05	Cluster3
Potra2n5c11527	LBD	33	6.16891e-06	1.40509e-05	Cluster1
Potra2n14c26864	LBD	33	1.75909e-05	1.48364e-05	Cluster5
Potra2n10c20783	LBD	24	1.13171e-05	1.12655e-05	Cluster2
Potra2n1c661	LBD	24	1.44871e-05	1.29217e-05	Cluster2
Potra2n2c5325	LBD	21	9.58602e-06	1.07043e-05	Cluster3
Potra2n8c17258	LBD	21	3.94131e-06	1.06959e-05	Cluster3
Potra2n15c28209	LFY	203	5.50048e-05	3.32216e-05	Cluster1
Potra2n3c7705	LSD	158	0.000158702	4.57037e-05	Cluster7
Potra2n11c22485	LSD	117	8.81164e-05	3.20739e-05	Cluster1
Potra2n4c8775	LSD	110	6.45517e-05	2.21211e-05	Cluster1
Potra2n251s35124	LSD	100	6.08317e-05	2.39194e-05	Cluster1
Potra2n1c3746	LSD	71	4.47778e-05	1.55126e-05	Cluster1
Potra2n1c1233	LSD	37	2.51183e-05	1.40438e-05	Cluster2
Potra2n17c31573	MIKC_MADS	442	0.000657241	8.06662e-05	Cluster1
Potra2n5c11227	MIKC_MADS	441	0.000279325	5.74872e-05	Cluster8
Potra2n1c2860	MIKC_MADS	437	0.000102373	9.07769e-05	Cluster4
Potra2n10c21057	MIKC_MADS	434	0.000153306	0.000130658	Cluster4
Potra2n11c23135	MIKC_MADS	338	0.000272981	6.31775e-05	Cluster1
Potra2n2c5701	MIKC_MADS	318	0.000263583	6.09213e-05	Cluster1
Potra2n4c8998	MIKC_MADS	296	0.000258707	5.72059e-05	Cluster1
Potra2n1c2483	MIKC_MADS	282	0.000379567	5.97025e-05	Cluster1
Potra2n12c24806	MIKC_MADS	269	0.000233425	4.91347e-05	Cluster8
Potra2n4c9486	MIKC_MADS	255	0.000311408	4.58888e-05	Cluster1
Potra2n4c9485	MIKC_MADS	241	0.00018831	3.33804e-05	Cluster1
Potra2n5c11478	MIKC_MADS	231	0.000184902	5.03233e-05	Cluster1
Potra2n7c16001	MIKC_MADS	224	2.78217e-05	3.34456e-05	Cluster1
Potra2n2c5459	MIKC_MADS	220	0.000190842	4.14582e-05	Cluster1
Potra2n13c25423	MIKC_MADS	214	0.000136939	5.15533e-05	Cluster8
Potra2n2c5571	MIKC_MADS	208	0.000232519	5.15557e-05	Cluster1
Potra2n3c6956	MIKC_MADS	205	0.000228711	5.01227e-05	Cluster1
Potra2n19c33693	MIKC_MADS	190	0.000113185	4.7947e-05	Cluster1
Potra2n17c31048	MIKC_MADS	189	0.000189501	4.60722e-05	Cluster1
Potra2n6c14978	MIKC_MADS	179	0.000144087	4.96288e-05	Cluster1
Potra2n1c482	MIKC_MADS	161	0.000217018	3.12047e-05	Cluster1
Potra2n1c481	MIKC_MADS	156	0.000133443	2.69707e-05	Cluster1
Potra2n8c17509	MIKC_MADS	151	0.000153082	3.26614e-05	Cluster1
Potra2n19c33690	MIKC_MADS	150	0.000137992	3.6659e-05	Cluster1
Potra2n7c16489	MIKC_MADS	139	3.85115e-05	0.000117521	Cluster5
Potra2n15c28068	MIKC_MADS	120	5.05244e-05	2.93636e-05	Cluster8
Potra2n3c6958	MIKC_MADS	107	7.52397e-05	2.41255e-05	Cluster7
Potra2n2c5422	MIKC_MADS	105	8.99497e-05	3.35219e-05	Cluster1
Potra2n13c25402	MIKC_MADS	97	6.6681e-05	3.18528e-05	Cluster1
Potra2n15c28298	MIKC_MADS	78	3.0843e-05	3.65387e-05	Cluster3
Potra2n7c15680	MIKC_MADS	66	2.9643e-05	1.61567e-05	Cluster1
Potra2n2c5049	MIKC_MADS	61	4.94177e-05	2.70939e-05	Cluster2
Potra2n12c24243	MIKC_MADS	57	2.87166e-05	3.70439e-05	Cluster3
Potra2n12c24811	MIKC_MADS	53	2.51353e-05	1.82899e-05	Cluster2
Potra2n3c6957	MIKC_MADS	52	5.17142e-05	2.20934e-05	Cluster6
Potra2n1c955	MIKC_MADS	48	1.68738e-05	1.41562e-05	Cluster1
Potra2n7c16552	MIKC_MADS	41	1.67956e-05	1.98475e-05	Cluster7
Potra2n5c11759	MIKC_MADS	39	2.14358e-05	1.47877e-05	Cluster1
Potra2n2c6187	MIKC_MADS	39	1.25386e-05	1.97185e-05	Cluster5
Potra2n10c20952	MIKC_MADS	24	5.23065e-06	1.16117e-05	Cluster1
Potra2n3c7421	MIKC_MADS	24	5.93495e-06	1.28339e-05	Cluster1
Potra2n12c24554	MIKC_MADS	21	5.00502e-06	1.12693e-05	Cluster5
Potra2n17c31554	M-type_MADS	468	5.16108e-05	0.000107323	Cluster8
Potra2n10c20264	M-type_MADS	444	0.00039729	6.22278e-05	Cluster8
Potra2n4c8429	M-type_MADS	348	0.000384577	4.47925e-05	Cluster1
Potra2n15c28523	M-type_MADS	338	0.000404159	6.77731e-05	Cluster1
Potra2n8c16798	M-type_MADS	334	2.03887e-05	3.98552e-05	Cluster8
Potra2n12c24643	M-type_MADS	306	0.00026822	5.74118e-05	Cluster1
Potra2n13c26145	M-type_MADS	277	0.000293924	6.12726e-05	Cluster1
Potra2n2c4101	M-type_MADS	197	1.55767e-05	2.76585e-05	Cluster8
Potra2n8c16979	M-type_MADS	174	0.000216009	3.86523e-05	Cluster4
Potra2n17c31685	M-type_MADS	160	2.91942e-05	3.27381e-05	Cluster1
Potra2n2c5862	M-type_MADS	156	0.000156962	2.94545e-05	Cluster1
Potra2n4c9609	M-type_MADS	138	1.44059e-05	2.0482e-05	Cluster1
Potra2n9c19425	M-type_MADS	112	6.68996e-05	1.97663e-05	Cluster1
Potra2n7c15692	M-type_MADS	95	3.97853e-05	2.08573e-05	Cluster1
Potra2n9c19727	M-type_MADS	77	4.87026e-05	1.86558e-05	Cluster1
Potra2n13c25384	M-type_MADS	62	6.52055e-05	1.85023e-05	Cluster1
Potra2n10c20829	M-type_MADS	51	2.13448e-05	1.62592e-05	Cluster1
Potra2n8c17407	M-type_MADS	46	2.60263e-05	1.9244e-05	Cluster1
Potra2n6c13026	M-type_MADS	45	1.83912e-05	1.40371e-05	Cluster6
Potra2n7c15628	M-type_MADS	44	3.8134e-05	1.33992e-05	Cluster1
Potra2n4c8685	MYB	650	0.000307148	0.000107447	Cluster8
Potra2n7c16578	MYB	574	0.000175147	6.08736e-05	Cluster8
Potra2n8c17350	MYB	532	0.000191113	6.92967e-05	Cluster8
Potra2n2c5381	MYB	432	4.19415e-05	7.17499e-05	Cluster8
Potra2n11c23403	MYB	409	8.71015e-05	7.17529e-05	Cluster8
Potra2n15c28619	MYB	376	0.00048754	6.72046e-05	Cluster1
Potra2n6c13368	MYB	366	3.29041e-05	0.000128914	Cluster8
Potra2n19c33364	MYB	357	0.000383773	7.26058e-05	Cluster8
Potra2n368s35429	MYB	344	1.79156e-05	3.93113e-05	Cluster8
Potra2n13c25689	MYB	328	0.000230086	5.83503e-05	Cluster8
Potra2n5c11381	MYB	317	0.000105181	3.85666e-05	Cluster8
Potra2n3c7194	MYB	304	9.04263e-05	3.58867e-05	Cluster8
Potra2n5c12194	MYB	292	7.96967e-05	4.07999e-05	Cluster8
Potra2n2c5533	MYB	287	0.000155073	5.83621e-05	Cluster8
Potra2n13c25042	MYB	274	8.00337e-05	7.2743e-05	Cluster8
Potra2n10c20966	MYB	273	8.14695e-05	4.11391e-05	Cluster1
Potra2n19c34073	MYB	271	0.000291913	5.76066e-05	Cluster1
Potra2n2c4614	MYB	269	4.63704e-05	3.62623e-05	Cluster1
Potra2n2c5237	MYB	267	5.28948e-05	3.81985e-05	Cluster1
Potra2n2c5132	MYB	266	0.000238064	4.00564e-05	Cluster1
Potra2n6c14231	MYB	264	0.000150991	3.46133e-05	Cluster8
Potra2n13c25048	MYB	257	5.395e-05	3.92261e-05	Cluster1
Potra2n10c21884	MYB	251	8.70412e-05	8.22599e-05	Cluster4
Potra2n11c22390	MYB	250	0.000174768	5.26657e-05	Cluster1
Potra2n17c31180	MYB	247	0.000279609	5.91837e-05	Cluster1
Potra2n19c33370	MYB	238	4.45391e-05	3.48323e-05	Cluster1
Potra2n4c8630	MYB	233	0.000108573	3.53243e-05	Cluster1
Potra2n8c18298	MYB	231	0.000151976	7.8589e-05	Cluster6
Potra2n19c33988	MYB	227	0.000113765	4.9276e-05	Cluster8
Potra2n8c17182	MYB	218	0.000204339	5.14211e-05	Cluster1
Potra2n19c33365	MYB	218	0.000253211	5.73824e-05	Cluster6
Potra2n10c21177	MYB	217	0.000131057	4.07248e-05	Cluster4
Potra2n1c829	MYB	217	8.08676e-05	4.64159e-05	Cluster7
Potra2n3c7667	MYB	215	0.000162609	3.85204e-05	Cluster10
Potra2n10c20950	MYB	215	0.000241877	3.999e-05	Cluster8
Potra2n13c25793	MYB	211	0.000273762	4.19736e-05	Cluster1
Potra2n17c30808	MYB	211	4.65922e-05	4.60084e-05	Cluster8
Potra2n6c12880	MYB	208	0.000285909	3.83703e-05	Cluster1
Potra2n3c7477	MYB	208	0.000248871	8.09134e-05	Cluster5
Potra2n1c3565	MYB	203	6.77807e-05	3.15195e-05	Cluster8
Potra2n10c21350	MYB	202	0.000153431	5.6775e-05	Cluster6
Potra2n5c12813	MYB	200	7.36168e-05	6.12921e-05	Cluster2
Potra2n9c19893	MYB	200	0.000313494	9.37531e-05	Cluster3
Potra2n1c1901	MYB	199	0.000130433	4.53037e-05	Cluster6
Potra2n5c11186	MYB	197	0.000283188	6.10656e-05	Cluster7
Potra2n14c27343	MYB	195	0.000163114	4.82238e-05	Cluster1
Potra2n1c2036	MYB	194	0.000321519	8.53086e-05	Cluster5
Potra2n7c15765	MYB	193	0.000135857	7.5249e-05	Cluster7
Potra2n17c31208	MYB	189	0.000106572	4.31217e-05	Cluster1
Potra2n19c33363	MYB	187	0.000138172	3.94514e-05	Cluster1
Potra2n1c712	MYB	187	0.000185076	4.01439e-05	Cluster1
Potra2n3c7305	MYB	186	0.000122035	7.65741e-05	Cluster7
Potra2n15c28789	MYB	183	0.0001072	3.511e-05	Cluster1
Potra2n15c28915	MYB	183	0.000131155	5.90234e-05	Cluster6
Potra2n18c33209	MYB	182	0.000169277	5.1968e-05	Cluster8
Potra2n1c1707	MYB	172	0.000139696	4.96679e-05	Cluster8
Potra2n4c9217	MYB	166	4.04607e-05	2.70497e-05	Cluster8
Potra2n2c4668	MYB	165	0.000160136	3.36738e-05	Cluster1
Potra2n1c2250	MYB	160	9.33071e-05	4.12004e-05	Cluster7
Potra2n4c10299	MYB	160	5.26238e-05	2.23241e-05	Cluster8
Potra2n1c1020	MYB	158	0.000145387	6.18584e-05	Cluster5
Potra2n6c14786	MYB	156	8.58071e-05	3.06948e-05	Cluster8
Potra2n14c26586	MYB	153	0.000114576	4.12061e-05	Cluster6
Potra2n10c20888	MYB	152	0.00015193	3.32833e-05	Cluster6
Potra2n12c24760	MYB	148	7.77234e-05	6.02853e-05	Cluster7
Potra2n15c28838	MYB	148	6.97332e-05	2.87877e-05	Cluster8
Potra2n8c17418	MYB	146	1.65816e-05	2.8341e-05	Cluster1
Potra2n10c22314	MYB	140	0.000155189	4.03538e-05	Cluster4
Potra2n14c26965	MYB	137	0.000107846	2.73851e-05	Cluster1
Potra2n13c26303	MYB	137	7.78336e-05	7.69893e-05	Cluster2
Potra2n3c7097	MYB	136	9.7483e-05	8.71354e-05	Cluster2
Potra2n15c28466	MYB	130	0.000144419	4.23092e-05	Cluster7
Potra2n1c2621	MYB	128	0.000108833	3.23126e-05	Cluster6
Potra2n2c4723	MYB	127	9.64177e-05	2.69019e-05	Cluster3
Potra2n13c25791	MYB	125	6.64938e-05	2.84643e-05	Cluster8
Potra2n16c30276	MYB	124	9.36771e-05	6.94575e-05	Cluster5
Potra2n5c11819	MYB	123	7.99715e-05	1.92455e-05	Cluster1
Potra2n10c21439	MYB	122	4.09691e-05	2.79897e-05	Cluster8
Potra2n11c22732	MYB	118	7.97838e-05	2.36315e-05	Cluster8
Potra2n1c48	MYB	116	5.54731e-05	2.30727e-05	Cluster8
Potra2n6c13365	MYB	115	0.000112145	5.12685e-05	Cluster3
Potra2n17c31272	MYB	108	7.29147e-05	2.72712e-05	Cluster1
Potra2n15c28524	MYB	107	5.95058e-06	1.95848e-05	Cluster1
Potra2n1c2161	MYB	107	3.68009e-05	5.58867e-05	Cluster5
Potra2n8c17815	MYB	104	9.30185e-05	2.63367e-05	Cluster8
Potra2n12c24224	MYB	103	0.00015534	3.94043e-05	Cluster1
Potra2n15c27995	MYB	103	7.20883e-05	2.60892e-05	Cluster1
Potra2n15c28118	MYB	103	8.93142e-05	3.12029e-05	Cluster1
Potra2n13c25043	MYB	102	8.87861e-05	2.71237e-05	Cluster1
Potra2n5c11957	MYB	101	4.81908e-05	2.01561e-05	Cluster8
Potra2n1c1494	MYB	99	7.23563e-05	2.26826e-05	Cluster1
Potra2n7c15968	MYB	99	1.5225e-05	4.5256e-05	Cluster3
Potra2n7c15498	MYB	99	7.65764e-05	6.48788e-05	Cluster6
Potra2n13c25162	MYB	98	5.59741e-05	2.41011e-05	Cluster1
Potra2n3c7193	MYB	98	5.16375e-05	1.96483e-05	Cluster8
Potra2n14c27236	MYB	97	0.000104062	3.42098e-05	Cluster2
Potra2n9c18946	MYB	97	5.17326e-05	1.85769e-05	Cluster4
Potra2n4c9980	MYB	95	2.99726e-05	2.01207e-05	Cluster6
Potra2n3c6499	MYB	95	3.32648e-05	1.78644e-05	Cluster8
Potra2n14c26751	MYB	94	6.11612e-05	2.35274e-05	Cluster1
Potra2n13c25693	MYB	93	6.60045e-05	1.93181e-05	Cluster8
Potra2n14c27283	MYB	90	5.94468e-05	2.2584e-05	Cluster6
Potra2n6c13245	MYB	89	8.0287e-05	1.95163e-05	Cluster1
Potra2n1c300	MYB	89	3.10285e-05	1.58619e-05	Cluster4
Potra2n18c32828	MYB	87	5.09774e-05	2.14431e-05	Cluster1
Potra2n5c11563	MYB	86	0.000123826	2.12045e-05	Cluster3
Potra2n8c17405	MYB	83	6.26717e-05	2.14193e-05	Cluster1
Potra2n4c9673	MYB	82	3.56365e-05	3.23611e-05	Cluster3
Potra2n1c2948	MYB	81	5.04065e-05	2.4396e-05	Cluster1
Potra2n4c9371	MYB	80	4.80588e-05	1.91481e-05	Cluster1
Potra2n9c19651	MYB	79	7.29905e-05	3.65092e-05	Cluster5
Potra2n14c27143	MYB	79	7.0849e-05	2.14417e-05	Cluster8
Potra2n12c24046	MYB	76	5.057e-05	2.21388e-05	Cluster7
Potra2n1c3996	MYB	75	7.7864e-05	2.05302e-05	Cluster5
Potra2n3c6768	MYB	73	4.54001e-05	1.65468e-05	Cluster6
Potra2n8c17986	MYB	71	3.06074e-05	4.28838e-05	Cluster5
Potra2n7c16212	MYB	71	2.855e-05	1.88058e-05	Cluster6
Potra2n18c32158	MYB	70	4.10999e-05	1.97131e-05	Cluster8
Potra2n12c24889	MYB	68	3.3845e-05	1.89732e-05	Cluster1
Potra2n1c1195	MYB	68	4.4189e-05	2.25765e-05	Cluster1
Potra2n8c17750	MYB	68	3.93757e-05	1.50571e-05	Cluster1
Potra2n6c14243	MYB	67	2.61417e-05	1.76852e-05	Cluster1
Potra2n10c21638	MYB	67	8.32935e-05	2.38135e-05	Cluster3
Potra2n197s34857	MYB	67	4.48388e-05	4.17961e-05	Cluster5
Potra2n1c2305	MYB	67	3.43381e-05	2.06025e-05	Cluster7
Potra2n2c5298	MYB	67	4.05695e-05	1.5145e-05	Cluster8
Potra2n8c18173	MYB	66	2.99607e-05	1.47889e-05	Cluster1
Potra2n1c607	MYB	66	4.59182e-05	1.99939e-05	Cluster2
Potra2n17c31788	MYB	65	2.22204e-05	2.01647e-05	Cluster1
Potra2n611s36153	MYB	65	4.71896e-05	1.54685e-05	Cluster1
Potra2n6c14590	MYB	65	3.31643e-05	1.81951e-05	Cluster5
Potra2n443s35699	MYB	65	1.57688e-05	2.91766e-05	Cluster7
Potra2n19c34022	MYB	64	1.77425e-05	2.02238e-05	Cluster1
Potra2n2c5746	MYB	64	1.63281e-05	2.68367e-05	Cluster6
Potra2n5c12307	MYB	63	3.02008e-05	1.71611e-05	Cluster3
Potra2n12c24887	MYB	61	2.73738e-05	1.66695e-05	Cluster1
Potra2n8c17198	MYB	60	4.09129e-05	1.64739e-05	Cluster5
Potra2n15c28834	MYB	59	2.83246e-05	1.3866e-05	Cluster6
Potra2n19c34229	MYB	59	3.05417e-05	1.85169e-05	Cluster6
Potra2n2c4833	MYB	55	2.95016e-05	1.40272e-05	Cluster2
Potra2n10c20700	MYB	54	3.01598e-05	1.67616e-05	Cluster1
Potra2n12c24397	MYB	53	1.92399e-05	1.52603e-05	Cluster1
Potra2n6c13175	MYB	52	4.37359e-05	2.08889e-05	Cluster2
Potra2n6c14484	MYB	52	1.45016e-05	2.7319e-05	Cluster5
Potra2n16c30173	MYB	50	2.66475e-05	1.29028e-05	Cluster5
Potra2n10c20245	MYB	48	3.15933e-05	1.23501e-05	Cluster4
Potra2n10c21096	MYB	46	1.35713e-05	1.79823e-05	Cluster1
Potra2n7c16051	MYB	45	1.42484e-05	1.59563e-05	Cluster8
Potra2n4c9511	MYB	44	2.38951e-05	1.35371e-05	Cluster5
Potra2n158s34763	MYB	42	4.79614e-05	2.13973e-05	Cluster5
Potra2n9c19455	MYB	41	9.81098e-06	1.78304e-05	Cluster7
Potra2n19c33645	MYB	40	2.63153e-05	1.37147e-05	Cluster5
Potra2n18c32912	MYB	38	1.17994e-05	2.02179e-05	Cluster2
Potra2n14c26951	MYB	36	7.15082e-06	1.33134e-05	Cluster1
Potra2n14c26484	MYB	36	1.4291e-05	1.5116e-05	Cluster6
Potra2n3c7379	MYB	32	7.17631e-06	9.28126e-06	Cluster1
Potra2n5c12056	MYB	28	7.65394e-06	1.23902e-05	Cluster1
Potra2n13c25883	MYB	27	3.36616e-06	1.22979e-05	Cluster1
Potra2n6c14593	MYB	27	7.65997e-06	1.19535e-05	Cluster1
Potra2n369s35438	MYB	24	4.20734e-07	1.37372e-05	Cluster1
Potra2n1c1932	MYB	24	3.67579e-06	1.4773e-05	Cluster3
Potra2n1c297	MYB	24	6.54388e-06	1.11458e-05	Cluster6
Potra2n3c6771	MYB	24	9.63581e-06	1.36858e-05	Cluster7
Potra2n16c29715	MYB	23	1.00841e-05	1.10271e-05	Cluster5
Potra2n4c9199	MYB	20	2.96714e-06	1.21248e-05	Cluster1
Potra2n9c20054	MYB_related	509	0.000124089	8.4823e-05	Cluster8
Potra2n2c4990	MYB_related	412	0.000224644	5.78006e-05	Cluster8
Potra2n4c9824	MYB_related	378	0.000271215	0.000104879	Cluster6
Potra2n9c19094	MYB_related	334	0.000129987	3.59035e-05	Cluster8
Potra2n12c24034	MYB_related	332	3.56626e-05	0.000268143	Cluster3
Potra2n2c6128	MYB_related	323	0.000131186	7.07528e-05	Cluster8
Potra2n14c27196	MYB_related	319	6.88044e-05	0.000365021	Cluster3
Potra2n15c28942	MYB_related	300	1.52412e-05	0.000218366	Cluster3
Potra2n6c14921	MYB_related	282	0.000440253	6.6367e-05	Cluster1
Potra2n2c4766	MYB_related	271	3.78388e-05	0.000313316	Cluster3
Potra2n7c16425	MYB_related	269	0.000116326	4.32795e-05	Cluster8
Potra2n17c30646	MYB_related	260	0.000684302	7.97928e-05	Cluster3
Potra2n7c16410	MYB_related	252	0.000163733	9.23127e-05	Cluster6
Potra2n16c30021	MYB_related	249	8.77437e-06	0.000264713	Cluster3
Potra2n235s35067	MYB_related	239	0.000417859	5.77381e-05	Cluster1
Potra2n4c8547	MYB_related	237	0.000147154	4.89006e-05	Cluster8
Potra2n9c19762	MYB_related	224	0.000116317	8.70092e-05	Cluster6
Potra2n4c9091	MYB_related	196	0.000186133	6.89701e-05	Cluster3
Potra2n10c20775	MYB_related	194	0.000249282	5.51716e-05	Cluster1
Potra2n5c10807	MYB_related	192	0.000136367	3.75565e-05	Cluster8
Potra2n2c6095	MYB_related	180	6.33706e-05	4.21821e-05	Cluster6
Potra2n12c24342	MYB_related	178	0.000153127	4.722e-05	Cluster6
Potra2n12c23966	MYB_related	172	0.000126515	4.63083e-05	Cluster1
Potra2n10c22220	MYB_related	167	0.000185027	4.365e-05	Cluster7
Potra2n9c19091	MYB_related	137	0.000222846	4.29032e-05	Cluster1
Potra2n5c10842	MYB_related	130	5.90422e-05	2.21488e-05	Cluster6
Potra2n4c8720	MYB_related	122	6.18459e-05	4.09224e-05	Cluster6
Potra2n17c31125	MYB_related	120	6.47548e-05	3.78722e-05	Cluster1
Potra2n17c30947	MYB_related	115	5.09043e-05	3.56258e-05	Cluster8
Potra2n2c4935	MYB_related	110	2.50796e-05	5.1804e-05	Cluster3
Potra2n7c16603	MYB_related	106	6.53144e-05	2.84372e-05	Cluster4
Potra2n14c26350	MYB_related	105	9.98762e-05	3.03655e-05	Cluster1
Potra2n8c16760	MYB_related	104	5.27092e-05	2.50915e-05	Cluster1
Potra2n2c4057	MYB_related	101	3.64976e-05	3.55579e-05	Cluster2
Potra2n4c8597	MYB_related	100	6.77548e-05	2.64608e-05	Cluster1
Potra2n14c27038	MYB_related	100	0.000104193	5.89442e-05	Cluster5
Potra2n124s34597	MYB_related	96	8.2669e-05	3.85773e-05	Cluster7
Potra2n4c9514	MYB_related	92	4.23164e-05	2.52648e-05	Cluster6
Potra2n1c1979	MYB_related	91	6.32861e-05	2.06372e-05	Cluster1
Potra2n17c31715	MYB_related	86	6.06385e-05	2.26723e-05	Cluster6
Potra2n1c1265	MYB_related	86	5.17607e-05	1.52125e-05	Cluster7
Potra2n4c9074	MYB_related	81	3.81661e-05	1.70505e-05	Cluster1
Potra2n17c30663	MYB_related	77	0.000147521	3.98582e-05	Cluster5
Potra2n5c12578	MYB_related	76	3.04051e-05	1.29859e-05	Cluster1
Potra2n15c28607	MYB_related	75	4.21231e-05	2.79911e-05	Cluster5
Potra2n8c18391	MYB_related	74	3.61377e-05	4.35454e-05	Cluster3
Potra2n9c19929	MYB_related	74	8.4841e-05	1.77811e-05	Cluster5
Potra2n10c22203	MYB_related	74	5.21083e-05	2.48569e-05	Cluster6
Potra2n6c13282	MYB_related	74	5.59429e-05	1.89687e-05	Cluster8
Potra2n10c22092	MYB_related	71	5.74827e-05	2.09191e-05	Cluster5
Potra2n14c27102	MYB_related	68	3.43263e-05	1.93968e-05	Cluster1
Potra2n8c17470	MYB_related	67	5.00484e-05	2.19416e-05	Cluster1
Potra2n1c2093	MYB_related	67	3.3282e-05	2.70194e-05	Cluster3
Potra2n6c13371	MYB_related	66	3.43367e-05	1.62055e-05	Cluster1
Potra2n2c5451	MYB_related	64	3.38136e-05	1.74782e-05	Cluster5
Potra2n6c14013	MYB_related	64	7.81808e-05	2.97063e-05	Cluster7
Potra2n5c11718	MYB_related	62	4.81318e-05	1.73653e-05	Cluster1
Potra2n15c29012	MYB_related	61	3.12621e-05	1.86049e-05	Cluster1
Potra2n6c14214	MYB_related	58	2.70608e-05	1.88529e-05	Cluster1
Potra2n9c19354	MYB_related	55	1.42636e-05	1.04839e-05	Cluster10
Potra2n13c24995	MYB_related	55	3.74583e-05	2.20032e-05	Cluster7
Potra2n9c19848	MYB_related	54	1.99379e-05	2.62863e-05	Cluster7
Potra2n8c17126	MYB_related	53	2.59461e-05	8.16903e-06	Cluster3
Potra2n13c26123	MYB_related	53	2.07392e-05	1.57835e-05	Cluster6
Potra2n18c32776	MYB_related	51	1.56148e-05	1.64443e-05	Cluster1
Potra2n14c27749	MYB_related	50	1.73543e-05	1.27701e-05	Cluster1
Potra2n16c30096	MYB_related	44	1.89601e-05	1.53059e-05	Cluster1
Potra2n7c15597	MYB_related	44	1.56216e-05	1.42489e-05	Cluster8
Potra2n6c14206	MYB_related	43	1.39932e-05	1.30966e-05	Cluster1
Potra2n6c13987	MYB_related	43	1.22005e-05	8.63165e-06	Cluster7
Potra2n2c6411	MYB_related	39	1.29678e-05	1.24234e-05	Cluster1
Potra2n1c1501	MYB_related	39	2.84731e-05	1.07726e-05	Cluster6
Potra2n1c2548	MYB_related	37	1.40336e-05	1.75585e-05	Cluster1
Potra2n288s35211	MYB_related	33	2.64198e-05	1.11461e-05	Cluster3
Potra2n15c28335	MYB_related	31	7.11553e-06	1.49201e-05	Cluster1
Potra2n1c1358	MYB_related	27	1.02523e-05	1.14707e-05	Cluster3
Potra2n6c14141	MYB_related	26	3.52356e-06	1.6079e-05	Cluster3
Potra2n3c7818	MYB_related	25	5.66034e-06	1.00389e-05	Cluster1
Potra2n18c32697	MYB_related	25	1.14347e-05	1.30903e-05	Cluster5
Potra2n3c6563	MYB_related	22	7.96974e-06	9.75738e-06	Cluster6
Potra2n3c7326	MYB_related	20	3.33673e-06	1.12922e-05	Cluster1
Potra2n8c18549	MYB_related	20	6.23114e-06	1.11982e-05	Cluster8
Potra2n3c6965	MYB_related	19	6.27852e-06	1.20954e-05	Cluster5
Potra2n16c29299	MYB_related	16	1.62003e-06	8.81929e-06	Cluster1
Potra2n10c20715	MYB_related	8	1.05791e-06	7.61184e-06	Cluster1
Potra2n1c3061	NA	201	0.000235476	5.62387e-05	Cluster7
Potra2n15c28594	NA	162	7.26099e-05	4.29644e-05	Cluster8
Potra2n6c15028	NA	145	4.71288e-05	8.49621e-05	Cluster6
Potra2n4c8772	NA	142	4.35033e-05	5.84192e-05	Cluster6
Potra2n17c31485	NA	123	9.36558e-05	3.1369e-05	Cluster1
Potra2n10c21470	NA	122	0.000110007	3.50458e-05	Cluster1
Potra2n11c23501	NA	116	6.54457e-05	2.51767e-05	Cluster1
Potra2n2c4432	NA	93	7.06995e-05	2.78114e-05	Cluster1
Potra2n6c14250	NA	81	5.1427e-05	1.72145e-05	Cluster7
Potra2n4c10143	NA	74	4.88661e-05	1.82686e-05	Cluster6
Potra2n1c248	NA	59	3.20136e-05	2.81117e-05	Cluster6
Potra2n15c28328	NA	44	3.27222e-05	1.71168e-05	Cluster6
Potra2n10c22021	NA	42	2.73186e-05	1.66769e-05	Cluster2
Potra2n2c5749	NA	25	5.63136e-06	1.17123e-05	Cluster7
Potra2n4c9655	NA	23	5.95736e-06	1.16728e-05	Cluster2
Potra2n4c10441	NAC	761	0.000173491	0.00013196	Cluster8
Potra2n6c12867	NAC	577	9.41667e-05	7.33949e-05	Cluster8
Potra2n13c25816	NAC	496	0.000213378	0.000116606	Cluster8
Potra2n228s35025	NAC	476	9.25224e-05	6.99254e-05	Cluster8
Potra2n18c33225	NAC	410	0.00038522	7.82168e-05	Cluster8
Potra2n12c24184	NAC	404	4.56159e-05	9.63043e-05	Cluster8
Potra2n15c28784	NAC	345	9.02724e-05	5.58625e-05	Cluster8
Potra2n2c6109	NAC	329	0.000265992	0.00019685	Cluster5
Potra2n11c23285	NAC	322	0.000336425	6.80005e-05	Cluster1
Potra2n11c22789	NAC	314	0.000187165	4.44673e-05	Cluster4
Potra2n16c29948	NAC	304	0.000256909	5.49854e-05	Cluster1
Potra2n3c7144	NAC	297	0.000140619	7.99039e-05	Cluster3
Potra2n8c17349	NAC	297	0.00017692	4.74644e-05	Cluster8
Potra2n13c26105	NAC	293	0.000377852	5.84003e-05	Cluster1
Potra2n1c1780	NAC	273	0.000315828	4.74896e-05	Cluster1
Potra2n12c23697	NAC	270	0.000144572	4.97939e-05	Cluster1
Potra2n6c13273	NAC	267	0.000230653	4.15064e-05	Cluster1
Potra2n5c11892	NAC	265	0.000324505	4.63106e-05	Cluster1
Potra2n5c11940	NAC	262	0.00019782	5.18159e-05	Cluster1
Potra2n14c26917	NAC	252	0.000239537	6.1743e-05	Cluster1
Potra2n7c16062	NAC	250	9.04687e-05	3.65735e-05	Cluster8
Potra2n3c6990	NAC	244	0.000100092	0.000112803	Cluster5
Potra2n5c10537	NAC	234	0.000149958	3.90059e-05	Cluster1
Potra2n19c33856	NAC	229	0.000167804	5.39829e-05	Cluster1
Potra2n15c28944	NAC	228	0.000183417	5.12577e-05	Cluster8
Potra2n7c15489	NAC	226	0.000152291	8.20629e-05	Cluster7
Potra2n5c11942	NAC	221	0.000179039	3.53287e-05	Cluster1
Potra2n5c10826	NAC	221	6.22668e-05	0.000205535	Cluster5
Potra2n11c22533	NAC	213	4.56556e-05	0.00014172	Cluster3
Potra2n5c12247	NAC	211	0.000177691	4.97586e-05	Cluster6
Potra2n11c22845	NAC	207	0.00024774	4.37225e-05	Cluster1
Potra2n7c15824	NAC	205	8.51978e-05	4.30276e-05	Cluster6
Potra2n17c31664	NAC	202	0.000178981	4.64254e-05	Cluster1
Potra2n12c24589	NAC	197	9.25043e-05	5.03073e-05	Cluster8
Potra2n19c33858	NAC	196	0.000169051	5.23284e-05	Cluster1
Potra2n11c23114	NAC	194	0.000157711	5.48277e-05	Cluster1
Potra2n9c18711	NAC	194	0.00012422	3.53102e-05	Cluster8
Potra2n8c17335	NAC	184	3.59773e-05	2.9117e-05	Cluster1
Potra2n13c25814	NAC	182	2.91787e-05	0.000153484	Cluster5
Potra2n11c22498	NAC	173	0.000179357	0.000107746	Cluster5
Potra2n10c20963	NAC	173	9.85118e-05	3.96463e-05	Cluster8
Potra2n4c8837	NAC	164	0.000134459	3.65225e-05	Cluster4
Potra2n12c24032	NAC	161	0.000110908	4.40876e-05	Cluster8
Potra2n4c9146	NAC	161	0.000101272	3.17219e-05	Cluster8
Potra2n4c8731	NAC	160	0.000132086	4.90343e-05	Cluster4
Potra2n6c13965	NAC	160	0.00011486	3.39556e-05	Cluster4
Potra2n15c29161	NAC	156	2.66881e-05	2.54447e-05	Cluster1
Potra2n3c7710	NAC	154	8.88806e-05	2.90435e-05	Cluster8
Potra2n4c9596	NAC	148	0.000107959	3.65448e-05	Cluster1
Potra2n1c1897	NAC	147	0.000129465	2.64126e-05	Cluster1
Potra2n3c8054	NAC	143	0.000102194	2.93594e-05	Cluster1
Potra2n1c3017	NAC	141	0.000138189	4.33576e-05	Cluster2
Potra2n1c1238	NAC	141	0.000137712	6.12141e-05	Cluster3
Potra2n17c30726	NAC	137	8.40539e-05	3.40344e-05	Cluster1
Potra2n19c33453	NAC	130	6.12135e-05	3.01913e-05	Cluster1
Potra2n2c5907	NAC	113	0.000100383	2.62772e-05	Cluster1
Potra2n19c33624	NAC	111	6.53208e-05	3.35143e-05	Cluster1
Potra2n12c24750	NAC	110	8.25943e-05	3.35461e-05	Cluster7
Potra2n2c5031	NAC	110	0.000194391	5.66097e-05	Cluster7
Potra2n7c16511	NAC	110	0.000111838	3.33762e-05	Cluster7
Potra2n1c656	NAC	109	1.69712e-05	2.06771e-05	Cluster1
Potra2n17c31394	NAC	107	1.92021e-05	3.75915e-05	Cluster6
Potra2n11c22767	NAC	106	9.34274e-05	2.90377e-05	Cluster1
Potra2n12c23694	NAC	105	5.63155e-05	2.63405e-05	Cluster1
Potra2n16c29949	NAC	105	8.02014e-05	2.47571e-05	Cluster1
Potra2n1c1031	NAC	105	0.000125365	3.3534e-05	Cluster1
Potra2n9c18878	NAC	105	7.09422e-05	2.61614e-05	Cluster1
Potra2n16c29737	NAC	104	6.2325e-05	2.57121e-05	Cluster1
Potra2n19c34126	NAC	102	3.24767e-05	8.2167e-05	Cluster5
Potra2n14c27203	NAC	95	8.84383e-05	2.71216e-05	Cluster1
Potra2n1c3797	NAC	95	4.28706e-05	4.50486e-05	Cluster5
Potra2n2c5030	NAC	94	5.20873e-05	2.41854e-05	Cluster1
Potra2n7c15776	NAC	93	4.89761e-05	2.03117e-05	Cluster1
Potra2n2c6408	NAC	92	5.72167e-05	1.97037e-05	Cluster1
Potra2n18c32675	NAC	90	7.4635e-05	2.94391e-05	Cluster4
Potra2n14c26636	NAC	90	2.60972e-05	6.29338e-05	Cluster5
Potra2n2c5684	NAC	86	0.000163686	2.32788e-05	Cluster5
Potra2n15c28262	NAC	82	4.65545e-05	2.40652e-05	Cluster1
Potra2n6c13489	NAC	82	2.8837e-05	1.2729e-05	Cluster1
Potra2n11c23287	NAC	81	6.13681e-05	2.15221e-05	Cluster9
Potra2n4c10041	NAC	80	4.22817e-05	2.01024e-05	Cluster1
Potra2n14c26919	NAC	80	5.92216e-05	2.81402e-05	Cluster3
Potra2n5c11066	NAC	78	5.86073e-05	1.97751e-05	Cluster6
Potra2n10c20356	NAC	76	4.64443e-05	2.82325e-05	Cluster6
Potra2n2c4756	NAC	75	6.93311e-05	2.40692e-05	Cluster5
Potra2n12c23758	NAC	72	5.50172e-05	1.75485e-05	Cluster3
Potra2n2c5867	NAC	71	4.79909e-05	1.95791e-05	Cluster3
Potra2n369s35442	NAC	71	2.52324e-05	1.3904e-05	Cluster8
Potra2n7c15736	NAC	70	2.60846e-05	1.2116e-05	Cluster1
Potra2n11c22765	NAC	70	1.97617e-05	4.94934e-05	Cluster5
Potra2n10c20357	NAC	68	4.32135e-05	1.63096e-05	Cluster6
Potra2n19c34128	NAC	68	2.65981e-05	1.92374e-05	Cluster8
Potra2n5c11250	NAC	65	3.97979e-05	1.71111e-05	Cluster6
Potra2n5c12338	NAC	63	3.16295e-05	1.69688e-05	Cluster1
Potra2n8c17696	NAC	63	2.47307e-05	2.10033e-05	Cluster2
Potra2n7c16068	NAC	61	4.2084e-05	1.85921e-05	Cluster1
Potra2n2c4785	NAC	61	5.81589e-05	2.80603e-05	Cluster4
Potra2n14c26918	NAC	55	2.66064e-05	1.64552e-05	Cluster1
Potra2n14c27202	NAC	55	2.74841e-05	1.58679e-05	Cluster1
Potra2n1c3812	NAC	55	2.55317e-05	2.11052e-05	Cluster7
Potra2n10c21283	NAC	54	1.9611e-05	1.96487e-05	Cluster1
Potra2n17c31797	NAC	53	6.87563e-06	2.97433e-05	Cluster7
Potra2n12c23930	NAC	52	3.51061e-05	1.84447e-05	Cluster1
Potra2n13c25593	NAC	52	2.04416e-05	1.35412e-05	Cluster7
Potra2n3c8220	NAC	51	1.98125e-05	1.50566e-05	Cluster1
Potra2n14c26515	NAC	49	2.6387e-05	1.43026e-05	Cluster4
Potra2n14c27178	NAC	49	2.99993e-05	1.83521e-05	Cluster6
Potra2n7c15561	NAC	48	2.28448e-05	1.43795e-05	Cluster5
Potra2n8c16892	NAC	48	4.72034e-05	1.28883e-05	Cluster5
Potra2n5c11773	NAC	46	1.30395e-05	1.45019e-05	Cluster6
Potra2n1c3528	NAC	46	1.80115e-05	1.42464e-05	Cluster8
Potra2n5c12297	NAC	44	2.49183e-05	1.51109e-05	Cluster6
Potra2n13c25337	NAC	39	1.30929e-05	1.64564e-05	Cluster1
Potra2n15c29184	NAC	39	1.00641e-05	1.68446e-05	Cluster6
Potra2n1c507	NAC	38	2.80664e-05	1.39743e-05	Cluster6
Potra2n14c27204	NAC	37	1.8658e-05	2.13102e-05	Cluster5
Potra2n1c3530	NAC	37	1.85438e-05	2.43111e-05	Cluster5
Potra2n17c31173	NAC	36	1.08e-05	1.53398e-05	Cluster1
Potra2n4c9521	NAC	33	1.80364e-05	1.35482e-05	Cluster1
Potra2n15c29044	NAC	32	3.81205e-05	1.40692e-05	Cluster3
Potra2n8c17414	NAC	32	1.18491e-05	1.42115e-05	Cluster3
Potra2n2c5032	NAC	32	1.16226e-05	9.94691e-06	Cluster5
Potra2n114s34556	NAC	31	1.42235e-05	9.8371e-06	Cluster7
Potra2n1c2825	NAC	28	1.42249e-05	1.37411e-05	Cluster6
Potra2n4c8839	NAC	27	6.1667e-06	1.29378e-05	Cluster1
Potra2n3c7486	NAC	16	6.67258e-06	1.02668e-05	Cluster5
Potra2n15c28901	NF-X1	56	3.30944e-05	2.23294e-05	Cluster1
Potra2n10c20756	NF-X1	50	2.79387e-05	2.69921e-05	Cluster5
Potra2n12c24085	NF-X1	46	2.13294e-05	2.29701e-05	Cluster7
Potra2n9c19446	NF-YA	172	0.000248795	5.61886e-05	Cluster6
Potra2n18c32711	NF-YA	160	0.000208102	4.93146e-05	Cluster7
Potra2n6c13562	NF-YA	130	0.000249703	4.75851e-05	Cluster5
Potra2n1c2298	NF-YA	121	0.000166521	4.62481e-05	Cluster5
Potra2n16c29862	NF-YA	109	7.77695e-05	4.97538e-05	Cluster3
Potra2n6c14033	NF-YA	92	9.2663e-05	3.7025e-05	Cluster7
Potra2n1c3261	NF-YA	85	3.11548e-05	3.3842e-05	Cluster3
Potra2n1c2242	NF-YA	69	3.87418e-05	2.07939e-05	Cluster1
Potra2n11c23065	NF-YA	53	1.60538e-05	1.48562e-05	Cluster1
Potra2n9c19661	NF-YA	40	5.63524e-06	7.60072e-06	Cluster1
Potra2n6c14928	NF-YA	31	2.37906e-05	1.94929e-05	Cluster7
Potra2n10c20480	NF-YB	176	8.91862e-05	3.5141e-05	Cluster4
Potra2n360s35405	NF-YB	173	5.63818e-05	3.92935e-05	Cluster8
Potra2n1c3211	NF-YB	122	7.18484e-05	9.61799e-05	Cluster3
Potra2n5c12105	NF-YB	115	7.65808e-05	2.53464e-05	Cluster1
Potra2n8c17007	NF-YB	80	4.09746e-05	1.74431e-05	Cluster1
Potra2n15c28744	NF-YB	70	3.94276e-05	2.19318e-05	Cluster1
Potra2n14c27764	NF-YB	56	7.29939e-05	2.89191e-05	Cluster3
Potra2n9c18695	NF-YB	42	1.62672e-05	9.38004e-06	Cluster7
Potra2n12c24201	NF-YB	38	2.3274e-05	1.40632e-05	Cluster1
Potra2n16c30035	NF-YB	36	1.16163e-05	1.72749e-05	Cluster7
Potra2n16c29282	NF-YB	24	4.31013e-06	1.4907e-05	Cluster5
Potra2n17c30875	NF-YC	426	0.000403143	9.71291e-05	Cluster10
Potra2n7c16024	NF-YC	234	9.96067e-05	9.10504e-05	Cluster3
Potra2n5c11975	NF-YC	233	7.50712e-06	0.000216126	Cluster3
Potra2n4c9296	NF-YC	198	2.35225e-05	3.19484e-05	Cluster1
Potra2n12c24539	NF-YC	128	6.39829e-05	2.99886e-05	Cluster1
Potra2n685s36467	NF-YC	85	6.71037e-05	2.37666e-05	Cluster6
Potra2n9c19938	NF-YC	83	4.73057e-05	2.18908e-05	Cluster1
Potra2n1c1940	NF-YC	67	2.82452e-05	2.02397e-05	Cluster1
Potra2n1c271	NF-YC	65	6.17986e-05	1.90114e-05	Cluster7
Potra2n3c6750	NF-YC	62	4.33847e-05	1.78115e-05	Cluster5
Potra2n1c452	NF-YC	55	3.17782e-05	1.37922e-05	Cluster2
Potra2n5c12534	NF-YC	43	1.94756e-05	1.19036e-05	Cluster6
Potra2n13c26079	NF-YC	38	1.95271e-05	1.7047e-05	Cluster5
Potra2n8c18504	NF-YC	33	1.12752e-05	9.14943e-06	Cluster5
Potra2n15c28309	NF-YC	27	8.40118e-06	1.32157e-05	Cluster7
Potra2n1c723	Nin-like	193	8.23623e-05	7.44674e-05	Cluster6
Potra2n9c18665	Nin-like	131	6.44239e-05	4.08177e-05	Cluster7
Potra2n1c2557	Nin-like	103	6.49539e-05	2.84874e-05	Cluster6
Potra2n9c18666	Nin-like	93	6.41837e-05	1.77079e-05	Cluster9
Potra2n16c29612	Nin-like	88	6.77043e-05	2.14225e-05	Cluster1
Potra2n2c6368	Nin-like	75	3.34162e-05	3.15584e-05	Cluster6
Potra2n17c31776	Nin-like	70	4.00708e-05	3.49494e-05	Cluster5
Potra2n3c7205	Nin-like	66	3.5784e-05	2.55e-05	Cluster3
Potra2n9c19349	Nin-like	52	3.44019e-05	1.61408e-05	Cluster9
Potra2n5c10572	Nin-like	42	1.84796e-05	1.62692e-05	Cluster6
Potra2n7c15508	Nin-like	19	8.35562e-06	1.55996e-05	Cluster5
Potra2n2c5893	Nin-like	10	1.94653e-06	8.63456e-06	Cluster5
Potra2n4c10439	PHD	64	3.36421e-05	1.63794e-05	Cluster5
Potra2n14c26488	PttCycD3	82	5.60504e-05	3.48924e-05	Cluster2
Potra2n6c13714	RAV	206	0.000243274	4.27707e-05	Cluster8
Potra2n8c17701	RAV	102	3.4815e-05	4.98294e-05	Cluster6
Potra2n18c32298	RAV	64	3.86288e-05	2.31663e-05	Cluster1
Potra2n7c15829	RING/FYVE/PHD zinc finger	46	1.79301e-05	2.56695e-05	Cluster9
Potra2n10c22017	RING/U-box	279	0.000368838	6.14023e-05	Cluster1
Potra2n2c4691	RING/U-box	138	0.000141974	3.68413e-05	Cluster7
Potra2n13c25638	RING/U-box	128	4.68121e-05	5.01051e-05	Cluster7
Potra2n2c5490	RING/U-box	123	0.000111243	6.33731e-05	Cluster7
Potra2n3c7317	RING/U-box	113	0.000103978	5.54618e-05	Cluster5
Potra2n9c19535	RING/U-box	86	3.24255e-05	1.27882e-05	Cluster9
Potra2n4c9479	RING/U-box	70	3.61273e-05	1.81405e-05	Cluster6
Potra2n6c13410	RING/U-box	48	1.13647e-05	2.55752e-05	Cluster7
Potra2n17c31537	RING/U-box	38	2.28958e-05	1.84026e-05	Cluster7
Potra2n12c24256	RING/U-box	24	8.08972e-06	1.40922e-05	Cluster7
Potra2n475s35761	RING-H2	76	4.53562e-05	1.53716e-05	Cluster3
Potra2n6c14167	S1Fa-like	65	3.13842e-05	1.77042e-05	Cluster7
Potra2n16c30063	S1Fa-like	46	2.29778e-05	2.20379e-05	Cluster7
Potra2n14c27750	SAP	120	9.42878e-05	2.86111e-05	Cluster1
Potra2n14c26778	SBP	277	0.000112785	5.87246e-05	Cluster8
Potra2n1c3477	SBP	272	0.000196638	3.15683e-05	Cluster8
Potra2n4c8809	SBP	252	0.000141805	5.37729e-05	Cluster8
Potra2n14c26777	SBP	239	5.65338e-05	3.98316e-05	Cluster8
Potra2n11c23309	SBP	157	0.000126108	3.57848e-05	Cluster1
Potra2n1c484	SBP	148	9.52266e-05	5.6049e-05	Cluster7
Potra2n2c6434	SBP	130	6.60742e-05	2.91762e-05	Cluster6
Potra2n1c459	SBP	126	0.000172918	7.28802e-05	Cluster7
Potra2n10c21058	SBP	104	7.85971e-05	3.8065e-05	Cluster5
Potra2n15c28293	SBP	104	0.000109111	3.64662e-05	Cluster6
Potra2n8c17506	SBP	95	5.77041e-05	1.86136e-05	Cluster1
Potra2n12c24560	SBP	95	6.32208e-05	2.76106e-05	Cluster6
Potra2n555s35938	SBP	85	2.34221e-05	1.50476e-05	Cluster8
Potra2n555s35937	SBP	84	5.18845e-05	2.76669e-05	Cluster1
Potra2n16c29675	SBP	75	3.91044e-05	2.69017e-05	Cluster5
Potra2n3c6960	SBP	73	4.80566e-05	2.07281e-05	Cluster6
Potra2n15c28687	SBP	67	1.5767e-05	3.04039e-05	Cluster6
Potra2n18c31956	SBP	67	4.49017e-05	2.04438e-05	Cluster7
Potra2n10c21055	SBP	58	4.49502e-05	1.67363e-05	Cluster7
Potra2n7c15463	SBP	55	3.07455e-05	1.85115e-05	Cluster1
Potra2n10c22180	SBP	55	4.49985e-05	2.4371e-05	Cluster6
Potra2n2c4700	SBP	50	5.83996e-05	2.68179e-05	Cluster5
Potra2n14c27260	SBP	42	2.14541e-05	3.22897e-05	Cluster7
Potra2n3c6934	SBP	37	2.56234e-05	1.18721e-05	Cluster7
Potra2n8c17511	SBP	36	1.32146e-05	2.15224e-05	Cluster5
Potra2n8c18444	SBP	36	1.16286e-05	2.01028e-05	Cluster5
Potra2n11c22831	SBP	19	2.06576e-05	1.18048e-05	Cluster3
Potra2n4c9865	SRS	293	0.000356257	4.55093e-05	Cluster1
Potra2n5c10747	SRS	165	0.000221113	4.04513e-05	Cluster1
Potra2n1c2350	SRS	127	8.48679e-05	2.99365e-05	Cluster1
Potra2n7c16484	SRS	125	8.46791e-05	2.07687e-05	Cluster1
Potra2n9c19538	SRS	115	9.07297e-05	3.46702e-05	Cluster1
Potra2n9c19050	SRS	109	0.000108646	2.59744e-05	Cluster4
Potra2n5c11757	SRS	97	4.58453e-05	1.96164e-05	Cluster1
Potra2n2c6186	SRS	93	7.16625e-05	2.21188e-05	Cluster1
Potra2n1c1283	SRS	68	2.28451e-05	1.24042e-05	Cluster10
Potra2n3c7755	SRS	65	2.15652e-05	2.01677e-05	Cluster1
Potra2n3c6709	SRS	60	6.74309e-05	1.94039e-05	Cluster5
Potra2n1c228	SRS	36	1.24308e-05	1.55333e-05	Cluster1
Potra2n11c22954	STAT	133	7.49632e-05	3.46084e-05	Cluster1
Potra2n1c3330	STAT	69	2.38458e-05	1.91792e-05	Cluster1
Potra2n1c953	TALE	270	0.00017575	8.04491e-05	Cluster4
Potra2n6c13552	TALE	225	0.000238509	7.69032e-05	Cluster7
Potra2n16c29878	TALE	219	0.000126795	0.000123746	Cluster5
Potra2n1c840	TALE	218	1.53994e-05	4.23313e-05	Cluster8
Potra2n4c9854	TALE	205	0.000154008	5.73058e-05	Cluster7
Potra2n2c6165	TALE	188	0.000127644	4.59438e-05	Cluster7
Potra2n10c20676	TALE	174	5.75248e-05	4.13835e-05	Cluster4
Potra2n9c19060	TALE	150	0.00016873	3.43978e-05	Cluster6
Potra2n4c10286	TALE	149	6.2982e-05	0.000108477	Cluster5
Potra2n9c19964	TALE	148	0.000310125	6.13002e-05	Cluster3
Potra2n2c5386	TALE	136	3.6222e-05	8.3172e-05	Cluster5
Potra2n11c23573	TALE	128	9.42197e-05	4.85368e-05	Cluster4
Potra2n6c13014	TALE	110	8.61341e-05	4.18646e-05	Cluster7
Potra2n18c32756	TALE	107	6.64872e-05	4.45091e-05	Cluster6
Potra2n15c28507	TALE	105	6.17371e-05	2.18449e-05	Cluster1
Potra2n1c1876	TALE	105	5.49873e-05	3.43903e-05	Cluster6
Potra2n10c22054	TALE	83	4.46465e-05	3.47948e-05	Cluster5
Potra2n5c10769	TALE	77	4.32936e-05	2.72336e-05	Cluster1
Potra2n6c13676	TALE	72	4.53435e-05	2.10715e-05	Cluster5
Potra2n8c17163	TALE	56	2.46859e-05	1.24509e-05	Cluster6
Potra2n2c6166	TALE	49	1.36238e-05	1.22038e-05	Cluster1
Potra2n8c18365	TALE	45	2.26402e-05	1.19711e-05	Cluster6
Potra2n12c24442	TALE	29	1.27911e-05	1.41505e-05	Cluster6
Potra2n4c8449	TALE	26	1.31062e-05	1.58415e-05	Cluster3
Potra2n13c26225	TALE	22	1.15642e-05	1.54839e-05	Cluster5
Potra2n9c20032	TALE	18	5.13087e-06	1.1075e-05	Cluster3
Potra2n10c21279	TCP	234	0.000296254	5.18837e-05	Cluster1
Potra2n17c31093	TCP	221	0.000246192	5.1756e-05	Cluster1
Potra2n15c28696	TCP	196	4.63268e-05	4.15925e-05	Cluster6
Potra2n14c26942	TCP	172	0.00010588	6.03426e-05	Cluster3
Potra2n17c30952	TCP	163	0.000122469	4.07993e-05	Cluster8
Potra2n1c2847	TCP	148	8.81468e-05	7.97591e-05	Cluster5
Potra2n16c29926	TCP	121	7.89024e-05	2.63449e-05	Cluster2
Potra2n2c5045	TCP	119	7.87748e-05	2.00398e-05	Cluster9
Potra2n13c25360	TCP	104	8.72667e-05	2.32357e-05	Cluster5
Potra2n4c9492	TCP	101	6.38464e-05	2.6775e-05	Cluster1
Potra2n5c12032	TCP	90	4.90669e-05	2.39494e-05	Cluster3
Potra2n15c28036	TCP	78	6.97897e-05	2.2782e-05	Cluster1
Potra2n6c14211	TCP	76	9.77711e-05	2.23702e-05	Cluster1
Potra2n19c33505	TCP	56	2.0384e-05	1.27571e-05	Cluster1
Potra2n6c13505	TCP	54	2.38043e-05	1.2776e-05	Cluster1
Potra2n12c24840	TCP	53	2.90626e-05	1.55612e-05	Cluster1
Potra2n7c15991	TCP	51	2.83666e-05	1.84773e-05	Cluster3
Potra2n16c30132	TCP	49	2.19344e-05	1.55125e-05	Cluster1
Potra2n3c6976	TCP	48	2.11584e-05	1.26832e-05	Cluster6
Potra2n11c23312	TCP	45	2.21277e-05	2.18005e-05	Cluster1
Potra2n19c33640	TCP	29	1.77969e-05	1.24226e-05	Cluster1
Potra2n8c17689	TCP	27	4.46547e-06	1.38093e-05	Cluster8
Potra2n3c7417	TCP	26	4.32266e-06	1.16271e-05	Cluster1
Potra2n4c10360	TCP	22	1.00451e-05	1.12002e-05	Cluster5
Potra2n1c948	TCP	20	3.36868e-06	1.07544e-05	Cluster3
Potra2n13c25959	Trihelix	344	4.25557e-05	5.08041e-05	Cluster8
Potra2n12c24693	Trihelix	255	9.55198e-05	4.35961e-05	Cluster1
Potra2n6c14286	Trihelix	186	0.000190089	0.000125381	Cluster3
Potra2n3c7774	Trihelix	167	0.000134447	4.24768e-05	Cluster1
Potra2n1c3831	Trihelix	157	0.00013302	5.48418e-05	Cluster5
Potra2n10c20306	Trihelix	146	0.00021439	3.37746e-05	Cluster5
Potra2n2c5800	Trihelix	146	0.000131856	4.90355e-05	Cluster5
Potra2n11c22550	Trihelix	131	8.24771e-05	6.04002e-05	Cluster5
Potra2n6c12849	Trihelix	130	6.22706e-05	2.29325e-05	Cluster1
Potra2n16c30144	Trihelix	130	6.27699e-05	8.61439e-05	Cluster3
Potra2n2c5802	Trihelix	120	0.000144021	3.55258e-05	Cluster5
Potra2n2c4212	Trihelix	117	6.77055e-05	2.46928e-05	Cluster1
Potra2n18c32827	Trihelix	114	7.96086e-05	2.73524e-05	Cluster1
Potra2n1c535	Trihelix	110	0.00010237	2.78096e-05	Cluster5
Potra2n1c235	Trihelix	105	6.55587e-05	2.7268e-05	Cluster6
Potra2n3c6715	Trihelix	94	5.54739e-05	1.65174e-05	Cluster5
Potra2n16c29280	Trihelix	91	3.36647e-05	1.51929e-05	Cluster1
Potra2n18c32615	Trihelix	90	5.99748e-05	2.68872e-05	Cluster1
Potra2n8c17257	Trihelix	89	0.000132098	2.85345e-05	Cluster5
Potra2n19c34337	Trihelix	87	4.26023e-05	1.93659e-05	Cluster1
Potra2n5c12403	Trihelix	81	5.26174e-05	2.4153e-05	Cluster8
Potra2n5c11136	Trihelix	80	4.0905e-05	3.08044e-05	Cluster5
Potra2n3c7580	Trihelix	72	3.18688e-05	1.92096e-05	Cluster1
Potra2n12c24511	Trihelix	72	2.33596e-05	2.16064e-05	Cluster3
Potra2n1c153	Trihelix	70	4.78182e-05	1.86256e-05	Cluster1
Potra2n1c2684	Trihelix	69	3.24338e-05	1.80353e-05	Cluster1
Potra2n6c13369	Trihelix	65	3.28117e-05	1.90671e-05	Cluster1
Potra2n8c16836	Trihelix	65	3.27183e-05	2.79526e-05	Cluster3
Potra2n1c1308	Trihelix	63	3.0119e-05	1.64225e-05	Cluster1
Potra2n5c11137	Trihelix	59	3.57914e-05	1.77396e-05	Cluster5
Potra2n18c33236	Trihelix	56	3.44538e-05	1.42889e-05	Cluster1
Potra2n3c7031	Trihelix	53	1.12582e-05	2.54819e-05	Cluster3
Potra2n3c6669	Trihelix	51	1.96783e-05	1.54412e-05	Cluster1
Potra2n1c213	Trihelix	47	5.25463e-05	1.80348e-05	Cluster3
Potra2n8c18288	Trihelix	44	4.38011e-05	1.34406e-05	Cluster2
Potra2n16c30327	Trihelix	43	1.34286e-05	1.59316e-05	Cluster5
Potra2n10c20324	Trihelix	42	2.33759e-05	1.49778e-05	Cluster2
Potra2n6c14448	Trihelix	39	1.38845e-05	1.20849e-05	Cluster1
Potra2n819s36800	Trihelix	39	1.98087e-05	1.27045e-05	Cluster5
Potra2n1c967	Trihelix	34	2.15548e-05	1.56206e-05	Cluster5
Potra2n3c7978	Trihelix	31	1.508e-05	1.27393e-05	Cluster3
Potra2n8c16849	Trihelix	26	2.75023e-06	6.675e-06	Cluster8
Potra2n3c7430	Trihelix	25	7.1957e-06	1.02769e-05	Cluster1
Potra2n1c1122	Trihelix	24	3.73469e-06	9.83476e-06	Cluster1
Potra2n1c1583	Trihelix	24	5.12834e-06	1.20715e-05	Cluster5
Potra2n2c5146	Trihelix	23	7.97395e-06	1.10473e-05	Cluster5
Potra2n6c14288	Trihelix	18	4.21405e-06	8.9513e-06	Cluster2
Potra2n14c26724	Trihelix	17	1.92618e-06	1.02301e-05	Cluster1
Potra2n3c6626	Trihelix	17	1.05188e-05	1.32841e-05	Cluster3
Potra2n10c21953	Trihelix	16	2.29989e-06	9.05018e-06	Cluster1
Potra2n19c33553	VOZ	81	2.64998e-05	1.50715e-05	Cluster1
Potra2n4c8852	VOZ	53	2.21672e-05	1.37449e-05	Cluster1
Potra2n13c25230	VOZ	40	1.19689e-05	1.75069e-05	Cluster1
Potra2n11c23276	VOZ	11	1.60647e-06	7.97603e-06	Cluster3
Potra2n8c17992	Whirly	75	5.11109e-05	1.72125e-05	Cluster3
Potra2n10c21644	Whirly	57	3.01154e-05	1.75713e-05	Cluster1
Potra2n3c8041	Whirly	44	1.2346e-05	1.25064e-05	Cluster1
Potra2n14c26506	WOX	331	0.000115236	0.000150183	Cluster2
Potra2n4c8856	WOX	230	0.000200993	5.57754e-05	Cluster1
Potra2n13c25694	WOX	208	0.000199219	4.54076e-05	Cluster6
Potra2n10c21464	WOX	207	0.000262871	4.41116e-05	Cluster1
Potra2n2c5282	WOX	89	1.26863e-05	4.46523e-05	Cluster2
Potra2n2c6375	WOX	76	2.93745e-05	2.78216e-05	Cluster7
Potra2n5c11792	WOX	68	2.50216e-05	1.36071e-05	Cluster1
Potra2n5c11905	WOX	67	4.05346e-05	1.93429e-05	Cluster2
Potra2n10c20725	WOX	38	3.3339e-05	1.79635e-05	Cluster5
Potra2n5c10562	WOX	25	6.79499e-06	1.18901e-05	Cluster2
Potra2n3c7299	WRKY	386	0.00027772	7.15857e-05	Cluster1
Potra2n1c3191	WRKY	377	9.54367e-05	0.00012204	Cluster4
Potra2n11c23100	WRKY	364	0.000509292	7.0178e-05	Cluster1
Potra2n2c4716	WRKY	362	9.7369e-05	6.01251e-05	Cluster8
Potra2n16c30019	WRKY	338	4.48987e-05	7.30905e-05	Cluster8
Potra2n14c27051	WRKY	327	4.79695e-05	6.89027e-05	Cluster8
Potra2n11c22968	WRKY	320	0.000151113	5.71003e-05	Cluster4
Potra2n2c4882	WRKY	311	0.000378947	8.76311e-05	Cluster6
Potra2n6c14364	WRKY	307	0.00054349	6.30959e-05	Cluster6
Potra2n13c25523	WRKY	299	0.000104475	4.72184e-05	Cluster1
Potra2n818s36797	WRKY	245	4.27804e-05	1.76634e-05	Cluster4
Potra2n6c14139	WRKY	235	9.08518e-05	3.19883e-05	Cluster8
Potra2n18c33092	WRKY	233	0.000162684	8.47264e-05	Cluster6
Potra2n13c25524	WRKY	230	0.00014814	6.54376e-05	Cluster6
Potra2n13c25923	WRKY	228	0.000258573	9.56027e-05	Cluster3
Potra2n14c27101	WRKY	210	0.000102788	8.00429e-05	Cluster6
Potra2n17c31230	WRKY	204	2.89372e-05	3.42901e-05	Cluster1
Potra2n6c13730	WRKY	203	0.000187385	3.95485e-05	Cluster10
Potra2n2c4502	WRKY	193	0.000199898	4.61012e-05	Cluster1
Potra2n3c6479	WRKY	185	0.000200384	4.25219e-05	Cluster1
Potra2n7c15950	WRKY	179	8.69905e-05	5.67737e-05	Cluster3
Potra2n11c23194	WRKY	175	4.74522e-05	3.86109e-05	Cluster8
Potra2n6c12972	WRKY	173	0.000286803	5.46404e-05	Cluster2
Potra2n5c12366	WRKY	173	0.000249408	6.52201e-05	Cluster3
Potra2n3c6835	WRKY	170	6.29554e-05	4.86654e-05	Cluster6
Potra2n11c23614	WRKY	168	7.26136e-05	3.01839e-05	Cluster8
Potra2n2c4923	WRKY	165	3.89513e-05	1.97033e-05	Cluster8
Potra2n14c27297	WRKY	163	0.000247424	4.79326e-05	Cluster1
Potra2n14c27309	WRKY	163	0.000142859	4.85622e-05	Cluster6
Potra2n125s34624	WRKY	161	0.000140016	4.13804e-05	Cluster1
Potra2n1c366	WRKY	161	4.79095e-05	3.73004e-05	Cluster6
Potra2n2c4379	WRKY	152	0.000122919	3.19776e-05	Cluster1
Potra2n18c33178	WRKY	148	9.69584e-05	4.25772e-05	Cluster3
Potra2n4c8960	WRKY	145	0.000114356	2.54942e-05	Cluster4
Potra2n14c26711	WRKY	145	3.67974e-05	8.87671e-05	Cluster5
Potra2n5c10885	WRKY	137	0.000152127	3.92064e-05	Cluster5
Potra2n7c16230	WRKY	136	5.13512e-05	1.74492e-05	Cluster4
Potra2n11c22375	WRKY	133	9.60304e-05	4.10343e-05	Cluster4
Potra2n1c4016	WRKY	132	9.98826e-05	4.32951e-05	Cluster6
Potra2n1c2854	WRKY	131	0.000148312	3.43327e-05	Cluster1
Potra2n13c25005	WRKY	131	8.87908e-05	3.53604e-05	Cluster6
Potra2n18c33093	WRKY	116	8.144e-05	2.65248e-05	Cluster6
Potra2n14c26495	WRKY	116	0.000120864	2.97386e-05	Cluster7
Potra2n2c5891	WRKY	115	4.10665e-05	2.62746e-05	Cluster1
Potra2n5c12073	WRKY	115	6.56562e-05	3.60257e-05	Cluster3
Potra2n12c24564	WRKY	108	0.000100098	2.68172e-05	Cluster1
Potra2n10c21118	WRKY	108	4.85304e-05	3.11067e-05	Cluster8
Potra2n5c12086	WRKY	106	7.67954e-05	2.42267e-05	Cluster8
Potra2n1c23	WRKY	104	8.97064e-05	4.4518e-05	Cluster3
Potra2n17c31368	WRKY	103	4.98772e-05	2.34376e-05	Cluster6
Potra2n490s35789	WRKY	102	8.5056e-05	3.11731e-05	Cluster1
Potra2n2c4642	WRKY	100	0.000129866	2.19778e-05	Cluster4
Potra2n12c23969	WRKY	98	9.7882e-05	2.84147e-05	Cluster1
Potra2n1c3901	WRKY	98	0.000124175	3.54282e-05	Cluster1
Potra2n8c17466	WRKY	96	5.18611e-05	2.09268e-05	Cluster4
Potra2n14c27242	WRKY	95	3.12998e-05	2.38325e-05	Cluster8
Potra2n14c27647	WRKY	95	4.6031e-05	2.53587e-05	Cluster8
Potra2n8c17556	WRKY	92	4.74128e-05	2.12464e-05	Cluster1
Potra2n10c20990	WRKY	91	4.75459e-05	3.59895e-05	Cluster6
Potra2n15c28290	WRKY	89	6.25571e-05	2.13183e-05	Cluster1
Potra2n16c30514	WRKY	89	8.08172e-05	3.24148e-05	Cluster6
Potra2n18c33099	WRKY	88	6.13594e-05	1.80253e-05	Cluster1
Potra2n11c22462	WRKY	88	7.81316e-05	2.50632e-05	Cluster2
Potra2n6c13344	WRKY	86	3.79016e-05	1.63884e-05	Cluster1
Potra2n2c4928	WRKY	82	6.79126e-05	2.18241e-05	Cluster1
Potra2n3c7244	WRKY	81	9.45423e-05	2.82562e-05	Cluster3
Potra2n18c32313	WRKY	80	5.16389e-05	1.49812e-05	Cluster3
Potra2n3c6963	WRKY	77	4.39167e-05	1.98765e-05	Cluster1
Potra2n6c14578	WRKY	77	6.97854e-05	2.67947e-05	Cluster1
Potra2n5c11040	WRKY	77	2.02437e-05	1.93564e-05	Cluster8
Potra2n2c4658	WRKY	76	3.09127e-05	2.8481e-05	Cluster1
Potra2n4c8469	WRKY	76	4.98384e-05	1.92394e-05	Cluster5
Potra2n2c5151	WRKY	72	8.71962e-05	2.43189e-05	Cluster7
Potra2n3c7497	WRKY	67	2.39761e-05	1.64666e-05	Cluster1
Potra2n14c27047	WRKY	64	6.4189e-05	2.0926e-05	Cluster3
Potra2n4c9536	WRKY	62	2.74341e-05	1.72071e-05	Cluster1
Potra2n2c5291	WRKY	61	3.76442e-05	1.52804e-05	Cluster2
Potra2n1c1042	WRKY	58	1.46759e-05	2.07694e-05	Cluster3
Potra2n6c14406	WRKY	56	1.66616e-05	1.75684e-05	Cluster1
Potra2n6c12967	WRKY	54	1.94911e-05	1.27465e-05	Cluster1
Potra2n10c21019	WRKY	51	4.56617e-05	2.0035e-05	Cluster8
Potra2n17c31154	WRKY	45	1.55432e-05	1.46948e-05	Cluster1
Potra2n19c33341	WRKY	45	1.63227e-05	2.78694e-05	Cluster5
Potra2n4c9061	WRKY	44	2.52214e-05	1.12396e-05	Cluster10
Potra2n16c30425	WRKY	43	1.31903e-05	1.5634e-05	Cluster6
Potra2n8c17446	WRKY	40	1.17398e-05	1.33197e-05	Cluster1
Potra2n5c11572	WRKY	37	7.25307e-06	1.8448e-05	Cluster3
Potra2n2c6053	WRKY	35	1.1723e-05	1.72503e-05	Cluster3
Potra2n14c27731	WRKY	33	1.48831e-05	1.47687e-05	Cluster3
Potra2n1c772	WRKY	33	1.20204e-05	1.61639e-05	Cluster5
Potra2n1c486	WRKY	14	1.44012e-05	8.98942e-06	Cluster3
Potra2n6c14723	WRKY	14	2.12834e-06	6.16763e-06	Cluster5
Potra2n18c32139	YABBY	305	0.000150841	5.23095e-05	Cluster1
Potra2n6c14767	YABBY	290	0.000204905	4.33569e-05	Cluster1
Potra2n3c7488	YABBY	273	0.000282297	4.83294e-05	Cluster1
Potra2n2c5108	YABBY	228	3.30221e-05	2.85209e-05	Cluster1
Potra2n16c29851	YABBY	198	9.05275e-05	4.61651e-05	Cluster1
Potra2n14c26826	YABBY	145	9.35481e-05	4.55026e-05	Cluster1
Potra2n1c1857	YABBY	143	4.88406e-05	2.68671e-05	Cluster8
Potra2n763s36708	YABBY	54	1.63418e-05	1.03848e-05	Cluster4
Potra2n4c10429	ZF-HD	159	0.000134217	2.85659e-05	Cluster1
Potra2n17c31206	ZF-HD	148	0.00014241	5.52271e-05	Cluster5
Potra2n2c6126	ZF-HD	135	9.18509e-05	2.42459e-05	Cluster1
Potra2n17c31200	ZF-HD	123	7.04466e-05	4.14629e-05	Cluster7
Potra2n15c28923	ZF-HD	120	9.47169e-05	3.42065e-05	Cluster1
Potra2n2c5481	ZF-HD	116	8.42139e-05	2.67156e-05	Cluster1
Potra2n8c17385	ZF-HD	116	0.000117903	2.55532e-05	Cluster7
Potra2n12c24058	ZF-HD	108	6.88781e-05	2.6154e-05	Cluster1
Potra2n4c9649	ZF-HD	108	5.94497e-05	2.26481e-05	Cluster1
Potra2n5c11434	ZF-HD	91	6.87897e-05	1.95964e-05	Cluster1
Potra2n10c20932	ZF-HD	91	5.08947e-05	1.83029e-05	Cluster5
Potra2n368s35432	ZF-HD	89	8.3224e-05	3.04286e-05	Cluster7
Potra2n7c16422	ZF-HD	86	4.89875e-05	1.65356e-05	Cluster1
Potra2n13c25856	ZF-HD	83	8.11711e-05	2.37868e-05	Cluster1
Potra2n5c10808	ZF-HD	81	4.38521e-05	2.85936e-05	Cluster1
Potra2n368s35430	ZF-HD	68	5.41308e-05	2.28277e-05	Cluster7
Potra2n13c25371	ZF-HD	62	2.82334e-05	2.45662e-05	Cluster4
Potra2n19c34196	ZF-HD	29	4.67713e-06	1.45653e-05	Cluster1
Potra2n10c20131	Znf-B	479	0.000204087	0.000294726	Cluster3
Potra2n1c3911		808	0.000368893	0.000136568	Cluster8
Potra2n4c9757		782	0.000135566	0.000113558	Cluster8
Potra2n3c6570		752	0.000142952	0.000101598	Cluster8
Potra2n9c18818		752	0.000284339	0.000110144	Cluster8
Potra2n9c18825		729	0.000139184	0.000119376	Cluster8
Potra2n4c9415		713	0.000308288	0.00014045	Cluster8
Potra2n156s34746		711	0.000398998	0.000151751	Cluster8
Potra2n554s35930		702	0.000174953	0.000140006	Cluster8
Potra2n3c7541		696	0.000143343	0.000156474	Cluster8
Potra2n6c15213		692	0.000156922	0.000111434	Cluster8
Potra2n6c13858		690	0.000298529	0.000162344	Cluster8
Potra2n10c20140		672	0.00247976	6.68093e-05	Cluster1
Potra2n81s34530		672	0.000321121	0.000104404	Cluster8
Potra2n10c21469		667	0.000146346	0.000136448	Cluster8
Potra2n18c32926		662	0.000121577	0.000122464	Cluster8
[truncated: 26,821 more rows]

## Sheet: S1G_NetworkClustersGO
GO.category	GO.ID	Term	Annotated	Significant	Expected	FDR	Cluster
BP	GO:0009451	RNA modification	430	275	160.27	8.6e-23	1
CC	GO:0005694	chromosome	603	304	218.14	1.5e-18	1
BP	GO:0090304	nucleic acid metabolic process	4093	1801	1525.58	1.8e-18	1
BP	GO:0043170	macromolecule metabolic process	9455	3732	3524.16	9.8e-15	1
BP	GO:0006807	nitrogen compound metabolic process	10614	4138	3956.15	1.6e-12	1
BP	GO:0006139	nucleobase-containing compound metabolic process	4848	2011	1806.99	4.2e-12	1
CC	GO:0140513	nuclear protein-containing complex	792	376	286.51	7.9e-11	1
BP	GO:0006974	DNA damage response	388	177	144.62	3.5e-09	1
BP	GO:0008037	cell recognition	153	93	57.03	3.9e-09	1
BP	GO:0015074	DNA integration	79	61	29.45	1.1e-08	1
BP	GO:0051276	chromosome organization	260	130	96.91	2.6e-08	1
BP	GO:0046483	heterocycle metabolic process	5460	2215	2035.1	6e-08	1
CC	GO:0032993	protein-DNA complex	420	211	151.94	6.8e-08	1
BP	GO:0007346	regulation of mitotic cell cycle	82	53	30.56	7.1e-08	1
BP	GO:1901360	organic cyclic compound metabolic process	5714	2289	2129.78	1.1e-07	1
BP	GO:0006839	mitochondrial transport	101	59	37.65	2.2e-07	1
CC	GO:0000313	organellar ribosome	66	44	23.88	2.5e-07	1
BP	GO:0006725	cellular aromatic compound metabolic process	5430	2195	2023.92	3.5e-07	1
MF	GO:0008080	N-acetyltransferase activity	141	75	54.15	7.9e-07	1
CC	GO:0005761	mitochondrial ribosome	60	42	21.71	1.2e-06	1
CC	GO:0031966	mitochondrial membrane	297	130	107.44	1.2e-06	1
MF	GO:0048038	quinone binding	42	31	16.13	1.5e-06	1
MF	GO:0015232	heme transmembrane transporter activity	18	16	6.91	1.7e-06	1
BP	GO:0015886	heme transport	18	16	6.71	1.9e-06	1
BP	GO:0022900	electron transport chain	297	117	110.7	2.2e-06	1
CC	GO:1990234	transferase complex	749	334	270.96	2.2e-06	1
BP	GO:0008033	tRNA processing	167	90	62.25	4.3e-06	1
BP	GO:0140014	mitotic nuclear division	73	46	27.21	1e-05	1
BP	GO:0048285	organelle fission	204	99	76.04	1.3e-05	1
MF	GO:0003690	double-stranded DNA binding	310	161	119.06	1.3e-05	1
BP	GO:0009069	serine family amino acid metabolic process	1280	487	477.09	1.4e-05	1
BP	GO:0006811	monoatomic ion transport	830	329	309.37	1.8e-05	1
MF	GO:0016782	transferase activity, transferring sulphur-containing groups	72	45	27.65	2.1e-05	1
BP	GO:0006605	protein targeting	225	105	83.86	3.3e-05	1
CC	GO:0031977	thylakoid lumen	28	21	10.13	3.3e-05	1
BP	GO:0016310	phosphorylation	2340	910	872.19	3.8e-05	1
BP	GO:0051189	prosthetic group metabolic process	16	14	5.96	5.4e-05	1
CC	GO:0019866	organelle inner membrane	278	120	100.57	5.6e-05	1
MF	GO:0016410	N-acyltransferase activity	150	79	57.61	6e-05	1
BP	GO:0043412	macromolecule modification	3667	1537	1366.8	6.1e-05	1
CC	GO:0005654	nucleoplasm	300	141	108.53	6.7e-05	1
BP	GO:0000075	cell cycle checkpoint signaling	56	32	20.87	8.1e-05	1
BP	GO:0043545	molybdopterin cofactor metabolic process	16	14	5.96	8.1e-05	1
BP	GO:0019646	aerobic electron transport chain	79	39	29.45	8.2e-05	1
BP	GO:0022904	respiratory electron transport chain	89	45	33.17	8.5e-05	1
BP	GO:0032324	molybdopterin cofactor biosynthetic process	15	13	5.59	9e-05	1
BP	GO:0051091	positive regulation of DNA-binding transcription factor activity	11	10	4.1	9.2e-05	1
CC	GO:0031248	protein acetyltransferase complex	116	67	41.96	9.4e-05	1
CC	GO:0043227	membrane-bounded organelle	8753	3168	3166.47	0.00011	1
CC	GO:0000228	nuclear chromosome	113	67	40.88	0.00012	1
CC	GO:0043231	intracellular membrane-bounded organelle	8725	3158	3156.34	0.00013	1
CC	GO:0030880	RNA polymerase complex	158	85	57.16	0.00013	1
BP	GO:1901678	iron coordination entity transport	23	19	8.57	0.00014	1
CC	GO:0000124	SAGA complex	26	18	9.41	0.00014	1
MF	GO:0008137	NADH dehydrogenase (ubiquinone) activity	43	29	16.51	0.00014	1
BP	GO:0006399	tRNA metabolic process	285	134	106.23	0.00017	1
MF	GO:0016675	oxidoreductase activity, acting on a heme group of donors	28	19	10.75	0.00017	1
MF	GO:0016651	oxidoreductase activity, acting on NAD(P)H	123	60	47.24	0.00018	1
BP	GO:0015988	energy coupled proton transmembrane transport, against electrochemical gradient	18	15	6.71	0.00019	1
MF	GO:0004518	nuclease activity	334	157	128.28	0.00019	1
BP	GO:0000394	RNA splicing, via endonucleolytic cleavage and ligation	11	11	4.1	0.0002	1
CC	GO:0044391	ribosomal subunit	169	79	61.14	0.0002	1
BP	GO:0034641	cellular nitrogen compound metabolic process	5991	2364	2233.02	0.00021	1
MF	GO:0004129	cytochrome-c oxidase activity	28	19	10.75	0.00021	1
BP	GO:0043086	negative regulation of catalytic activity	186	83	69.33	0.00023	1
BP	GO:0019684	photosynthesis, light reaction	120	54	44.73	0.00024	1
CC	GO:0005634	nucleus	4671	1769	1689.77	0.00025	1
BP	GO:0042773	ATP synthesis coupled electron transport	80	42	29.82	0.00028	1
BP	GO:0006164	purine nucleotide biosynthetic process	157	65	58.52	0.00029	1
BP	GO:0071806	protein transmembrane transport	127	61	47.34	0.00037	1
BP	GO:0000070	mitotic sister chromatid segregation	57	35	21.25	0.00041	1
CC	GO:0005739	mitochondrion	990	402	358.14	0.00053	1
CC	GO:0032991	protein-containing complex	4606	1753	1666.26	0.00063	1
CC	GO:0045261	proton-transporting ATP synthase complex, catalytic core F(1)	37	23	13.39	0.00081	1
CC	GO:0045277	respiratory chain complex IV	28	19	10.13	0.00107	1
CC	GO:0019008	molybdopterin synthase complex	10	9	3.62	0.00116	1
CC	GO:0043233	organelle lumen	963	386	348.37	0.00127	1
CC	GO:0070013	intracellular organelle lumen	963	386	348.37	0.00131	1
CC	GO:1902493	acetyltransferase complex	116	67	41.96	0.00138	1
CC	GO:0033178	proton-transporting two-sector ATPase complex, catalytic domain	60	32	21.71	0.00138	1
CC	GO:0005856	cytoskeleton	490	82	25.53	2e-25	2
CC	GO:0045298	tubulin complex	208	50	10.84	2.9e-21	2
BP	GO:0007049	cell cycle	611	89	31.18	3.2e-20	2
BP	GO:0022402	cell cycle process	447	72	22.81	6.1e-19	2
CC	GO:0005875	microtubule associated complex	131	35	6.83	1.1e-16	2
CC	GO:0099080	supramolecular complex	337	59	17.56	1.9e-16	2
MF	GO:0003774	cytoskeletal motor activity	155	37	7.38	2.1e-16	2
BP	GO:0007017	microtubule-based process	320	55	16.33	5.9e-16	2
CC	GO:0071944	cell periphery	2308	201	120.27	2.1e-14	2
MF	GO:0003777	microtubule motor activity	121	35	5.76	2.2e-13	2
BP	GO:0036211	protein modification process	3225	226	164.58	9.4e-12	2
MF	GO:0008092	cytoskeletal protein binding	346	57	16.48	1.1e-11	2
MF	GO:0005515	protein binding	4978	322	237.15	2.5e-11	2
BP	GO:0051726	regulation of cell cycle	274	45	13.98	1.6e-10	2
MF	GO:0035639	purine ribonucleoside triphosphate binding	3420	251	162.93	4.2e-10	2
MF	GO:0097367	carbohydrate derivative binding	3827	255	182.32	1e-09	2
BP	GO:0006793	phosphorus metabolic process	3618	237	184.64	2e-09	2
MF	GO:1901265	nucleoside phosphate binding	4214	270	200.76	9e-09	2
MF	GO:0003677	DNA binding	2418	133	115.19	7.4e-08	2
MF	GO:1901363	heterocyclic compound binding	4409	274	210.04	8.7e-08	2
MF	GO:0043168	anion binding	4226	271	201.33	1.6e-07	2
BP	GO:0016310	phosphorylation	2340	185	119.42	1.7e-07	2
CC	GO:0005886	plasma membrane	2029	166	105.73	1.9e-07	2
MF	GO:0003824	catalytic activity	12097	651	576.3	2.7e-07	2
MF	GO:0004672	protein kinase activity	1895	160	90.28	3.5e-07	2
MF	GO:0015631	tubulin binding	205	50	9.77	4.2e-07	2
MF	GO:0140657	ATP-dependent activity	928	78	44.21	7.5e-07	2
BP	GO:0071554	cell wall organization or biogenesis	513	52	26.18	1e-06	2
BP	GO:0036388	pre-replicative complex assembly	6	6	0.31	1e-06	2
BP	GO:0006259	DNA metabolic process	734	53	37.46	1.1e-06	2
CC	GO:0005576	extracellular region	401	45	20.9	1.3e-06	2
BP	GO:0005976	polysaccharide metabolic process	699	66	35.67	1.9e-06	2
CC	GO:0099081	supramolecular polymer	244	56	12.71	2.4e-06	2
CC	GO:0030312	external encapsulating structure	296	36	15.42	2.4e-06	2
CC	GO:0018995	host cellular component	19	8	0.99	2.6e-06	2
BP	GO:0007018	microtubule-based movement	114	35	5.82	3.1e-06	2
BP	GO:0010817	regulation of hormone levels	169	17	8.62	4.4e-06	2
BP	GO:0016043	cellular component organization	2263	156	115.49	6.5e-06	2
MF	GO:0046527	glucosyltransferase activity	227	27	10.81	7.2e-06	2
BP	GO:0009914	hormone transport	41	10	2.09	7.3e-06	2
BP	GO:0006468	protein phosphorylation	1798	155	91.76	1.2e-05	2
BP	GO:1902299	pre-replicative complex assembly involved in cell cycle DNA replication	6	6	0.31	1.5e-05	2
MF	GO:0016798	hydrolase activity, acting on glycosyl bonds	582	57	27.73	1.5e-05	2
BP	GO:0071249	cellular response to nitrate	38	9	1.94	2.2e-05	2
BP	GO:0071365	cellular response to auxin stimulus	155	24	7.91	3.3e-05	2
BP	GO:0051301	cell division	217	26	11.07	3.4e-05	2
BP	GO:0006270	DNA replication initiation	39	11	1.99	3.5e-05	2
BP	GO:0065009	regulation of molecular function	609	55	31.08	3.6e-05	2
MF	GO:0140097	catalytic activity, acting on DNA	283	25	13.48	3.7e-05	2
BP	GO:0071241	cellular response to inorganic substance	56	12	2.86	3.8e-05	2
MF	GO:0005524	ATP binding	3111	232	148.21	5.1e-05	2
MF	GO:0008447	L-ascorbate oxidase activity	17	7	0.81	5.2e-05	2
BP	GO:0010167	response to nitrate	50	9	2.55	5.6e-05	2
MF	GO:0003688	DNA replication origin binding	19	8	0.91	6.3e-05	2
BP	GO:0043412	macromolecule modification	3667	237	187.14	6.7e-05	2
CC	GO:0015630	microtubule cytoskeleton	317	68	16.52	6.7e-05	2
CC	GO:0005634	nucleus	4671	236	243.4	8.4e-05	2
CC	GO:0033597	mitotic checkpoint complex	4	3	0.21	8.4e-05	2
MF	GO:0140096	catalytic activity, acting on a protein	3848	251	183.32	0.00011	2
MF	GO:0043167	ion binding	7088	376	337.67	0.00011	2
MF	GO:0016627	oxidoreductase activity, acting on the CH-CH group of donors	419	38	19.96	0.00011	2
MF	GO:0016716	oxidoreductase activity, acting on paired donors, with incorporation or reduction of molecular oxygen, another compound as one donor, and incorporation of one atom of oxygen	7	4	0.33	0.00011	2
BP	GO:0009733	response to auxin	275	30	14.03	0.00014	2
BP	GO:0032886	regulation of microtubule-based process	34	9	1.74	0.00015	2
CC	GO:0042555	MCM complex	18	6	0.94	0.00016	2
CC	GO:0099513	polymeric cytoskeletal fiber	244	56	12.71	0.00017	2
BP	GO:0005975	carbohydrate metabolic process	1427	101	72.82	0.0002	2
MF	GO:0060089	molecular transducer activity	283	28	13.48	0.00022	2
MF	GO:0098772	molecular function regulator activity	483	41	23.01	0.00026	2
BP	GO:0051338	regulation of transferase activity	188	30	9.59	0.00027	2
CC	GO:0000307	cyclin-dependent protein kinase holoenzyme complex	69	20	3.6	0.00027	2
CC	GO:1902911	protein kinase complex	135	20	7.03	0.00038	2
MF	GO:0019900	kinase binding	137	18	6.53	0.00044	2
CC	GO:0005871	kinesin complex	96	33	5	0.00046	2
CC	GO:0005815	microtubule organizing center	64	11	3.33	0.00047	2
MF	GO:0080132	fatty acid alpha-hydroxylase activity	4	3	0.19	0.0005	2
CC	GO:0055044	symplast	475	42	24.75	0.0007	2
CC	GO:0009524	phragmoplast	57	10	2.97	0.00071	2
CC	GO:0005664	nuclear origin of replication recognition complex	7	3	0.36	0.00075	2
CC	GO:0030054	cell junction	480	42	25.01	0.00087	2
CC	GO:1902554	serine/threonine protein kinase complex	99	20	5.16	0.00113	2
CC	GO:0009579	thylakoid	379	100	37.68	2.1e-30	3
CC	GO:0042170	plastid membrane	315	93	31.32	7.1e-25	3
BP	GO:0015979	photosynthesis	235	79	23.79	4.7e-23	3
CC	GO:0034357	photosynthetic membrane	293	87	29.13	6.8e-22	3
CC	GO:0031968	organelle outer membrane	310	84	30.82	6.9e-19	3
CC	GO:0019867	outer membrane	310	84	30.82	1.3e-18	3
BP	GO:0009628	response to abiotic stimulus	833	177	84.31	6.7e-14	3
BP	GO:0048511	rhythmic process	71	31	7.19	2.5e-13	3
BP	GO:0050896	response to stimulus	3667	484	371.15	9.2e-12	3
BP	GO:0009408	response to heat	124	45	12.55	2.8e-11	3
CC	GO:0009532	plastid stroma	356	76	35.4	6.1e-11	3
CC	GO:0009521	photosystem	121	41	12.03	2.1e-10	3
BP	GO:0006091	generation of precursor metabolites and energy	777	134	78.64	2.5e-10	3
BP	GO:0051604	protein maturation	427	79	43.22	6.2e-10	3
BP	GO:0006457	protein folding	293	64	29.66	9.1e-10	3
MF	GO:0019904	protein domain specific binding	47	21	4.7	1e-09	3
CC	GO:0031967	organelle envelope	872	139	86.7	1.9e-09	3
CC	GO:0031975	envelope	872	139	86.7	5.3e-09	3
BP	GO:0009765	photosynthesis, light harvesting	41	23	4.15	6.6e-09	3
MF	GO:0031072	heat shock protein binding	56	22	5.6	7.8e-09	3
CC	GO:0009526	plastid envelope	501	125	49.81	9.8e-09	3
MF	GO:0051082	unfolded protein binding	227	51	22.7	2.3e-08	3
MF	GO:0016168	chlorophyll binding	41	19	4.1	2.8e-08	3
BP	GO:0072524	pyridine-containing compound metabolic process	327	63	33.1	3.7e-08	3
BP	GO:0072523	purine-containing compound catabolic process	199	43	20.14	1e-07	3
BP	GO:0034605	cellular response to heat	30	16	3.04	2.1e-07	3
BP	GO:0072526	pyridine-containing compound catabolic process	185	41	18.72	3.6e-07	3
BP	GO:0016052	carbohydrate catabolic process	379	74	38.36	4.2e-07	3
BP	GO:0016043	cellular component organization	2263	190	229.05	4.3e-07	3
MF	GO:0016491	oxidoreductase activity	2350	313	234.95	6.5e-07	3
MF	GO:0051787	misfolded protein binding	24	12	2.4	9.6e-07	3
BP	GO:0005975	carbohydrate metabolic process	1427	196	144.43	1.2e-06	3
BP	GO:0016051	carbohydrate biosynthetic process	486	85	49.19	1.2e-06	3
MF	GO:0044183	protein folding chaperone	25	12	2.5	1.4e-06	3
CC	GO:0005737	cytoplasm	6779	751	674.02	2.5e-06	3
BP	GO:0044283	small molecule biosynthetic process	1013	146	102.53	3.1e-06	3
BP	GO:0010109	regulation of photosynthesis	25	12	2.53	4.2e-06	3
CC	GO:0009535	chloroplast thylakoid membrane	222	74	22.07	4.4e-06	3
BP	GO:0042752	regulation of circadian rhythm	35	14	3.54	4.5e-06	3
BP	GO:0009657	plastid organization	174	28	17.61	5.2e-06	3
CC	GO:0031976	plastid thylakoid	260	79	25.85	5.2e-06	3
BP	GO:0009261	ribonucleotide catabolic process	186	41	18.83	1.3e-05	3
CC	GO:0009534	chloroplast thylakoid	260	79	25.85	1.6e-05	3
CC	GO:0048471	perinuclear region of cytoplasm	8	6	0.8	2.2e-05	3
BP	GO:0042440	pigment metabolic process	159	34	16.09	2.5e-05	3
BP	GO:0043467	regulation of generation of precursor metabolites and energy	21	10	2.13	2.8e-05	3
BP	GO:0010118	stomatal movement	70	19	7.09	3.5e-05	3
BP	GO:1901292	nucleoside phosphate catabolic process	199	41	20.14	4.8e-05	3
BP	GO:0051252	regulation of RNA metabolic process	2244	231	227.13	5e-05	3
MF	GO:0036094	small molecule binding	7420	772	741.85	8e-05	3
BP	GO:0033014	tetrapyrrole biosynthetic process	85	20	8.6	8.1e-05	3
CC	GO:0043227	membrane-bounded organelle	8753	893	870.29	8.3e-05	3
BP	GO:0055085	transmembrane transport	1595	202	161.44	8.7e-05	3
BP	GO:0009266	response to temperature stimulus	245	73	24.8	9.8e-05	3
BP	GO:0006753	nucleoside phosphate metabolic process	682	97	69.03	0.00011	3
BP	GO:0046031	ADP metabolic process	181	41	18.32	0.00013	3
BP	GO:0019684	photosynthesis, light reaction	120	39	12.15	0.00013	3
BP	GO:0019637	organophosphate metabolic process	1010	136	102.23	0.00014	3
BP	GO:0015995	chlorophyll biosynthetic process	49	17	4.96	0.00014	3
BP	GO:0061077	chaperone-mediated protein folding	77	29	7.79	0.00014	3
CC	GO:0009538	photosystem I reaction center	14	7	1.39	0.00016	3
CC	GO:0098588	bounding membrane of organelle	943	118	93.76	0.00021	3
BP	GO:0061136	regulation of proteasomal protein catabolic process	28	7	2.83	0.00023	3
BP	GO:0009154	purine ribonucleotide catabolic process	186	41	18.83	0.00024	3
BP	GO:0046434	organophosphate catabolic process	306	53	30.97	0.00026	3
BP	GO:0006112	energy reserve metabolic process	40	13	4.05	0.00029	3
CC	GO:0043231	intracellular membrane-bounded organelle	8725	888	867.51	0.00029	3
BP	GO:0009134	nucleoside diphosphate catabolic process	181	41	18.32	0.0003	3
BP	GO:0022607	cellular component assembly	844	83	85.43	0.00033	3
BP	GO:1901136	carbohydrate derivative catabolic process	282	48	28.54	0.00035	3
CC	GO:0005667	transcription regulator complex	1146	128	113.94	0.00037	3
BP	GO:0015977	carbon fixation	76	18	7.69	0.00041	3
BP	GO:2000895	hemicellulose catabolic process	11	5	1.11	0.00047	3
BP	GO:0015698	inorganic anion transport	143	28	14.47	0.00047	3
CC	GO:0030076	light-harvesting complex	5	4	0.5	0.00047	3
CC	GO:0009507	chloroplast	1377	282	136.91	0.00083	3
CC	GO:0055035	plastid thylakoid membrane	223	74	22.17	0.00113	3
CC	GO:0098807	chloroplast thylakoid membrane protein complex	5	4	0.5	0.00136	3
CC	GO:0005856	cytoskeleton	490	28	13.17	2.9e-07	4
BP	GO:0072334	UDP-galactose transmembrane transport	11	6	0.29	5.6e-06	4
BP	GO:0042546	cell wall biogenesis	220	16	5.87	9.7e-06	4
MF	GO:0008092	cytoskeletal protein binding	346	26	9.72	1e-05	4
BP	GO:0071669	plant-type cell wall organization or biogenesis	178	17	4.75	1.3e-05	4
CC	GO:0045298	tubulin complex	208	16	5.59	6.2e-05	4
BP	GO:1901259	chloroplast rRNA processing	11	6	1.11	7.6e-07	5
CC	GO:0005856	cytoskeleton	490	59	48.51	3.2e-06	5
BP	GO:0051252	regulation of RNA metabolic process	2244	224	227.38	4e-06	5
BP	GO:0006351	DNA-templated transcription	2148	216	217.65	6.3e-06	5
BP	GO:0006629	lipid metabolic process	1294	173	131.12	6.3e-06	5
BP	GO:0016043	cellular component organization	2263	230	229.31	2.2e-05	5
BP	GO:0042537	benzene-containing compound metabolic process	159	31	16.11	2.7e-05	5
BP	GO:0006355	regulation of DNA-templated transcription	1979	207	200.53	3.7e-05	5
BP	GO:0019219	regulation of nucleobase-containing compound metabolic process	2353	237	238.43	5e-05	5
CC	GO:0005783	endoplasmic reticulum	762	105	75.44	8.2e-05	5
BP	GO:2001141	regulation of RNA biosynthetic process	1979	207	200.53	8.9e-05	5
BP	GO:0071826	protein-RNA complex organization	218	93	23.43	1.8e-29	6
MF	GO:0003735	structural constituent of ribosome	556	277	58.67	2e-27	6
BP	GO:0034660	ncRNA metabolic process	558	154	59.96	3.6e-26	6
CC	GO:0043233	organelle lumen	963	233	111.31	3.7e-25	6
CC	GO:0070013	intracellular organelle lumen	963	233	111.31	3.9e-25	6
CC	GO:0031981	nuclear lumen	784	200	90.62	5.5e-25	6
CC	GO:0005730	nucleolus	431	171	49.82	1.1e-23	6
MF	GO:0003723	RNA binding	1326	312	139.91	2.1e-22	6
BP	GO:0070925	organelle assembly	215	69	23.1	3.6e-19	6
MF	GO:0045182	translation regulator activity	284	82	29.97	6.5e-18	6
CC	GO:0005622	intracellular anatomical structure	11103	1391	1283.31	4.8e-17	6
BP	GO:0044271	cellular nitrogen compound biosynthetic process	3734	654	401.25	2e-16	6
MF	GO:0003676	nucleic acid binding	4461	680	470.69	4.2e-15	6
CC	GO:0030684	preribosome	116	73	13.41	1e-14	6
BP	GO:0044237	cellular metabolic process	11125	1366	1195.48	1.4e-14	6
BP	GO:0010467	gene expression	4314	753	463.58	4.8e-14	6
CC	GO:0043226	organelle	9781	1244	1130.51	1.6e-13	6
BP	GO:0016072	rRNA metabolic process	249	106	26.76	9.9e-13	6
MF	GO:0097159	organic cyclic compound binding	8695	1092	917.44	6.7e-12	6
MF	GO:0043021	ribonucleoprotein complex binding	104	32	10.97	1.3e-11	6
BP	GO:0034470	ncRNA processing	439	132	47.17	1.4e-11	6
BP	GO:0010608	post-transcriptional regulation of gene expression	421	98	45.24	3.3e-11	6
BP	GO:0009987	cellular process	14822	1686	1592.76	6.1e-11	6
BP	GO:0043933	protein-containing complex organization	760	130	81.67	1e-10	6
BP	GO:0008152	metabolic process	13521	1559	1452.95	2.1e-10	6
MF	GO:0090079	translation regulator activity, nucleic acid binding	284	82	29.97	9.7e-10	6
BP	GO:0006807	nitrogen compound metabolic process	10614	1312	1140.57	1.6e-09	6
CC	GO:0005774	vacuolar membrane	303	54	35.02	4.9e-09	6
BP	GO:0140694	non-membrane-bounded organelle assembly	172	69	18.48	5.5e-09	6
BP	GO:0042273	ribosomal large subunit biogenesis	116	81	12.47	7.1e-09	6
BP	GO:0006413	translational initiation	210	55	22.57	2.4e-08	6
CC	GO:0005852	eukaryotic translation initiation factor 3 complex	43	19	4.97	5e-08	6
CC	GO:0070993	translation preinitiation complex	49	21	5.66	5.1e-08	6
BP	GO:0006414	translational elongation	101	38	10.85	1.2e-07	6
BP	GO:2000022	regulation of jasmonic acid mediated signaling pathway	21	14	2.26	2.4e-07	6
BP	GO:0071395	cellular response to jasmonic acid stimulus	40	16	4.3	6.1e-07	6
BP	GO:0009867	jasmonic acid mediated signaling pathway	39	16	4.19	6.4e-07	6
BP	GO:0016070	RNA metabolic process	3468	439	372.67	6.6e-07	6
BP	GO:0065003	protein-containing complex assembly	611	115	65.66	6.6e-07	6
BP	GO:1901564	organonitrogen compound metabolic process	7112	928	764.25	7e-07	6
CC	GO:0005634	nucleus	4671	607	539.89	8.9e-07	6
BP	GO:0009753	response to jasmonic acid	67	18	7.2	2e-06	6
BP	GO:0009064	glutamine family amino acid metabolic process	204	45	21.92	2.2e-06	6
CC	GO:0034388	Pwp2p-containing subcomplex of 90S preribosome	8	8	0.92	2.3e-06	6
BP	GO:0009966	regulation of signal transduction	178	34	19.13	2.4e-06	6
MF	GO:0140640	catalytic activity, acting on a nucleic acid	955	139	100.77	4.9e-06	6
BP	GO:0019538	protein metabolic process	5213	696	560.18	5.2e-06	6
MF	GO:0030515	snoRNA binding	29	18	3.06	8.3e-06	6
BP	GO:1902025	nitrate import	18	9	1.93	9.3e-06	6
BP	GO:0034248	regulation of amide metabolic process	366	93	39.33	1.1e-05	6
MF	GO:0005488	binding	14028	1566	1480.14	1.1e-05	6
BP	GO:0071704	organic substance metabolic process	12457	1477	1338.62	1.3e-05	6
BP	GO:0051246	regulation of protein metabolic process	714	125	76.73	2.1e-05	6
BP	GO:0042762	regulation of sulfur metabolic process	7	6	0.75	2.3e-05	6
BP	GO:0031347	regulation of defense response	98	25	10.53	2.6e-05	6
BP	GO:0080134	regulation of response to stress	151	33	16.23	2.8e-05	6
BP	GO:0009611	response to wounding	66	19	7.09	3e-05	6
BP	GO:0170034	L-amino acid biosynthetic process	262	52	28.15	3.1e-05	6
BP	GO:0071398	cellular response to fatty acid	40	16	4.3	5.8e-05	6
BP	GO:0048583	regulation of response to stimulus	314	55	33.74	0.0001	6
BP	GO:1901701	cellular response to oxygen-containing compound	353	57	37.93	0.0001	6
BP	GO:0051169	nuclear transport	141	25	15.15	0.00013	6
BP	GO:0046394	carboxylic acid biosynthetic process	669	108	71.89	0.00016	6
MF	GO:0016879	ligase activity, forming carbon-nitrogen bonds	97	24	10.23	0.00019	6
BP	GO:0015698	inorganic anion transport	143	26	15.37	0.00021	6
CC	GO:0043614	multi-eIF complex	4	4	0.46	0.00021	6
MF	GO:0016661	oxidoreductase activity, acting on other nitrogenous compounds as donors	10	6	1.06	0.00021	6
BP	GO:0043648	dicarboxylic acid metabolic process	218	44	23.43	0.00022	6
BP	GO:0071495	cellular response to endogenous stimulus	410	50	44.06	0.00025	6
BP	GO:0033750	ribosome localization	24	8	2.58	0.00025	6
CC	GO:0031429	box H/ACA snoRNP complex	6	5	0.69	0.00025	6
BP	GO:0042255	ribosome assembly	106	64	11.39	0.00026	6
BP	GO:0070542	response to fatty acid	67	18	7.2	0.0003	6
BP	GO:0015706	nitrate transmembrane transport	17	9	1.83	0.00037	6
BP	GO:0006396	RNA processing	867	179	93.17	0.00043	6
CC	GO:0055044	symplast	475	79	54.9	0.00043	6
BP	GO:0009273	peptidoglycan-based cell wall biogenesis	25	8	2.69	0.00046	6
BP	GO:0042254	ribosome biogenesis	816	383	87.69	0.00058	6
BP	GO:0023051	regulation of signaling	179	34	19.24	0.00058	6
BP	GO:0010229	inflorescence development	10	4	1.07	0.0006	6
CC	GO:0030054	cell junction	480	79	55.48	0.0006	6
BP	GO:0002181	cytoplasmic translation	118	60	12.68	0.00064	6
CC	GO:0022626	cytosolic ribosome	9	7	1.04	0.00064	6
BP	GO:1900424	regulation of defense response to bacterium	9	6	0.97	0.00065	6
BP	GO:0009697	salicylic acid biosynthetic process	11	6	1.18	0.00066	6
BP	GO:0022618	protein-RNA complex assembly	215	93	23.1	0.00067	6
BP	GO:0044238	primary metabolic process	11737	1393	1261.25	0.00071	6
BP	GO:0051641	cellular localization	1143	323	182.19	3.4e-28	7
CC	GO:0031090	organelle membrane	1492	409	256.91	9.7e-26	7
CC	GO:0005622	intracellular anatomical structure	11103	2087	1911.87	1.7e-24	7
CC	GO:0097708	intracellular vesicle	497	187	85.58	3.4e-24	7
CC	GO:0031982	vesicle	526	194	90.57	6.5e-24	7
CC	GO:0005829	cytosol	1440	385	247.96	1.4e-21	7
CC	GO:0098796	membrane protein complex	677	216	116.58	1.3e-19	7
CC	GO:0031984	organelle subcompartment	598	187	102.97	8.9e-18	7
CC	GO:0031410	cytoplasmic vesicle	496	187	85.41	1.7e-17	7
BP	GO:0046907	intracellular transport	679	218	108.23	5.3e-17	7
BP	GO:0051649	establishment of localization in cell	728	229	116.04	9.1e-17	7
BP	GO:0016071	mRNA metabolic process	474	128	75.56	4.3e-16	7
BP	GO:0016043	cellular component organization	2263	504	360.72	1.7e-13	7
CC	GO:0005740	mitochondrial envelope	316	107	54.41	3.5e-13	7
BP	GO:0051179	localization	3139	633	500.36	2e-12	7
CC	GO:0070469	respirasome	116	52	19.97	4.3e-12	7
BP	GO:0015031	protein transport	734	217	117	7.2e-12	7
BP	GO:0033036	macromolecule localization	1107	296	176.46	1.6e-11	7
CC	GO:1902494	catalytic complex	1730	424	297.9	3.4e-11	7
BP	GO:0006366	transcription by RNA polymerase II	403	93	64.24	4.1e-11	7
MF	GO:0032561	guanyl ribonucleotide binding	357	108	54.43	4.2e-11	7
CC	GO:0005773	vacuole	540	165	92.98	4.3e-11	7
CC	GO:0043226	organelle	9781	1818	1684.23	7.2e-11	7
BP	GO:0045184	establishment of protein localization	838	235	133.58	1e-10	7
MF	GO:0019001	guanyl nucleotide binding	360	108	54.89	1.3e-10	7
BP	GO:0006091	generation of precursor metabolites and energy	777	183	123.85	1.5e-10	7
BP	GO:0006357	regulation of transcription by RNA polymerase II	351	82	55.95	1.9e-10	7
BP	GO:0010038	response to metal ion	225	80	35.87	3.2e-10	7
MF	GO:0005200	structural constituent of cytoskeleton	49	22	7.47	4.7e-10	7
MF	GO:0005525	GTP binding	356	108	54.28	6.1e-10	7
BP	GO:0055086	nucleobase-containing small molecule metabolic process	917	201	146.17	1.4e-08	7
BP	GO:1901575	organic substance catabolic process	1775	357	282.94	1.4e-08	7
MF	GO:0140657	ATP-dependent activity	928	204	141.49	1.6e-08	7
BP	GO:0010608	post-transcriptional regulation of gene expression	421	100	67.11	2e-08	7
BP	GO:0000271	polysaccharide biosynthetic process	234	69	37.3	2.2e-08	7
BP	GO:0071840	cellular component organization or biogenesis	2994	581	477.25	2.6e-08	7
BP	GO:0009056	catabolic process	2011	397	320.55	3.2e-08	7
BP	GO:1901135	carbohydrate derivative metabolic process	1101	235	175.5	4.1e-08	7
BP	GO:0030163	protein catabolic process	610	148	97.23	7.3e-08	7
BP	GO:1901565	organonitrogen compound catabolic process	1098	242	175.02	9.7e-08	7
BP	GO:0034248	regulation of amide metabolic process	366	85	58.34	1.4e-07	7
BP	GO:0006753	nucleoside phosphate metabolic process	682	152	108.71	2.5e-07	7
CC	GO:0000502	proteasome complex	146	57	25.14	2.5e-07	7
CC	GO:0022624	proteasome accessory complex	52	26	8.95	2.9e-07	7
CC	GO:0032991	protein-containing complex	4606	899	793.13	3.1e-07	7
BP	GO:0009832	plant-type cell wall biogenesis	143	51	22.79	3.9e-07	7
BP	GO:0051246	regulation of protein metabolic process	714	155	113.81	4.5e-07	7
BP	GO:0071705	nitrogen compound transport	1087	270	173.27	6.1e-07	7
CC	GO:0098798	mitochondrial protein-containing complex	231	75	39.78	6.3e-07	7
CC	GO:0005838	proteasome regulatory particle	52	26	8.95	6.8e-07	7
MF	GO:0003712	transcription coregulator activity	143	34	21.8	7e-07	7
BP	GO:0044087	regulation of cellular component biogenesis	73	28	11.64	7.7e-07	7
BP	GO:0006508	proteolysis	1147	239	182.83	8.4e-07	7
BP	GO:0009057	macromolecule catabolic process	1000	212	159.4	9.2e-07	7
MF	GO:0060090	molecular adaptor activity	219	61	33.39	1.2e-06	7
CC	GO:0048475	coated membrane	101	40	17.39	1.4e-06	7
MF	GO:1901265	nucleoside phosphate binding	4214	718	642.5	1.7e-06	7
BP	GO:0010499	proteasomal ubiquitin-independent protein catabolic process	32	22	5.1	1.8e-06	7
BP	GO:0010629	negative regulation of gene expression	242	62	38.57	1.9e-06	7
BP	GO:0044248	cellular catabolic process	1044	215	166.41	2e-06	7
BP	GO:0043632	modification-dependent macromolecule catabolic process	438	123	69.82	2e-06	7
MF	GO:0001727	lipid kinase activity	38	17	5.79	2.1e-06	7
BP	GO:0040029	epigenetic regulation of gene expression	14	10	2.23	2.4e-06	7
BP	GO:1901137	carbohydrate derivative biosynthetic process	549	127	87.51	2.7e-06	7
MF	GO:0044877	protein-containing complex binding	402	98	61.29	2.9e-06	7
BP	GO:0043254	regulation of protein-containing complex assembly	46	22	7.33	3.6e-06	7
MF	GO:0033218	amide binding	125	40	19.06	3.9e-06	7
MF	GO:0042625	ATPase-coupled ion transmembrane transporter activity	37	19	5.64	4e-06	7
MF	GO:0004298	threonine-type endopeptidase activity	46	22	7.01	5.1e-06	7
CC	GO:0098800	inner mitochondrial membrane protein complex	152	68	26.17	5.2e-06	7
CC	GO:1990351	transporter complex	112	42	19.29	5.7e-06	7
CC	GO:0030964	NADH dehydrogenase complex	50	31	8.61	6.6e-06	7
BP	GO:0006396	RNA processing	867	162	138.2	6.7e-06	7
MF	GO:0070003	threonine-type peptidase activity	52	23	7.93	7e-06	7
BP	GO:0019637	organophosphate metabolic process	1010	205	160.99	7.1e-06	7
BP	GO:0016049	cell growth	245	66	39.05	9.1e-06	7
CC	GO:0016020	membrane	4609	888	793.64	9.3e-06	7
BP	GO:0071669	plant-type cell wall organization or biogenesis	178	55	28.37	1e-05	7
CC	GO:0005746	mitochondrial respirasome	76	44	13.09	1e-05	7
BP	GO:0006730	one-carbon metabolic process	60	23	9.56	1.1e-05	7
BP	GO:0010035	response to inorganic substance	464	107	73.96	1.1e-05	7
BP	GO:0070592	cell wall polysaccharide biosynthetic process	92	39	14.66	1.3e-05	7
BP	GO:0043687	post-translational protein modification	688	148	109.67	1.4e-05	7
BP	GO:0016051	carbohydrate biosynthetic process	486	110	77.47	1.4e-05	7
MF	GO:0052742	phosphatidylinositol kinase activity	27	13	4.12	1.5e-05	7
BP	GO:2000144	positive regulation of DNA-templated transcription initiation	18	11	2.87	1.7e-05	7
MF	GO:0046961	proton-transporting ATPase activity, rotational mechanism	34	19	5.18	1.7e-05	7
CC	GO:0005694	chromosome	603	133	103.83	1.8e-05	7
MF	GO:0016817	hydrolase activity, acting on acid anhydrides	683	146	104.14	1.8e-05	7
BP	GO:0051603	proteolysis involved in protein catabolic process	526	138	83.84	2.7e-05	7
CC	GO:0030117	membrane coat	101	40	17.39	2.8e-05	7
CC	GO:0030662	coated vesicle membrane	95	43	16.36	3e-05	7
BP	GO:0030029	actin filament-based process	128	39	20.4	3.3e-05	7
CC	GO:0008540	proteasome regulatory particle, base subcomplex	27	15	4.65	3.3e-05	7
CC	GO:0005856	cytoskeleton	490	111	84.38	3.5e-05	7
BP	GO:0072522	purine-containing compound biosynthetic process	169	45	26.94	3.6e-05	7
MF	GO:0140296	general transcription initiation factor binding	35	14	5.34	3.6e-05	7
MF	GO:0004478	methionine adenosyltransferase activity	11	7	1.68	4.1e-05	7
BP	GO:0060261	positive regulation of transcription initiation by RNA polymerase II	18	11	2.87	4.3e-05	7
BP	GO:0044036	cell wall macromolecule metabolic process	181	49	28.85	4.6e-05	7
BP	GO:0042546	cell wall biogenesis	220	57	35.07	5.4e-05	7
BP	GO:0090066	regulation of anatomical structure size	41	18	6.54	5.4e-05	7
BP	GO:0040007	growth	315	77	50.21	5.5e-05	7
BP	GO:0009226	nucleotide-sugar biosynthetic process	38	16	6.06	5.8e-05	7
BP	GO:0006417	regulation of translation	362	82	57.7	6.3e-05	7
BP	GO:1901564	organonitrogen compound metabolic process	7112	1179	1133.66	7.1e-05	7
MF	GO:0003878	ATP citrate synthase activity	5	5	0.76	7.4e-05	7
BP	GO:0009894	regulation of catabolic process	113	35	18.01	7.6e-05	7
MF	GO:0052716	hydroquinone:oxygen oxidoreductase activity	45	15	6.86	7.9e-05	7
MF	GO:0005515	protein binding	4978	859	758.98	8e-05	7
BP	GO:0045491	xylan metabolic process	67	27	10.68	8.1e-05	7
BP	GO:0035556	intracellular signal transduction	527	108	84	9.1e-05	7
CC	GO:0098803	respiratory chain complex	95	47	16.36	9.2e-05	7
CC	GO:1990204	oxidoreductase complex	174	64	29.96	9.3e-05	7
BP	GO:0010383	cell wall polysaccharide metabolic process	151	45	24.07	9.4e-05	7
BP	GO:0046398	UDP-glucuronate metabolic process	5	5	0.8	9.9e-05	7
CC	GO:0045271	respiratory chain complex I	50	31	8.61	0.00011	7
BP	GO:0010558	negative regulation of macromolecule biosynthetic process	345	79	54.99	0.00012	7
MF	GO:0016746	acyltransferase activity	1026	204	156.43	0.00012	7
MF	GO:0034647	histone H3K4me/H3K4me2/H3K4me3 demethylase activity	13	7	1.98	0.00012	7
BP	GO:0110154	RNA decapping	20	10	3.19	0.00013	7
BP	GO:0009890	negative regulation of biosynthetic process	362	83	57.7	0.00013	7
BP	GO:0031327	negative regulation of cellular biosynthetic process	358	83	57.07	0.00013	7
BP	GO:0015980	energy derivation by oxidation of organic compounds	311	95	49.57	0.00013	7
CC	GO:0012506	vesicle membrane	201	80	34.61	0.00013	7
CC	GO:0005743	mitochondrial inner membrane	235	87	40.47	0.00013	7
MF	GO:0003824	catalytic activity	12097	1937	1844.4	0.00013	7
BP	GO:1901361	organic cyclic compound catabolic process	502	112	80.02	0.00014	7
BP	GO:2000142	regulation of DNA-templated transcription initiation	27	11	4.3	0.00017	7
BP	GO:0072521	purine-containing compound metabolic process	610	128	97.23	0.00018	7
BP	GO:0009988	cell-cell recognition	7	4	1.12	0.00019	7
CC	GO:0019774	proteasome core complex, beta-subunit complex	9	7	1.55	0.00019	7
CC	GO:0035770	ribonucleoprotein granule	75	25	12.91	0.00019	7
MF	GO:0003924	GTPase activity	281	82	42.84	0.00019	7
BP	GO:0022412	cellular process involved in reproduction in multicellular organism	134	38	21.36	0.00022	7
BP	GO:0006888	endoplasmic reticulum to Golgi vesicle-mediated transport	129	60	20.56	0.00023	7
BP	GO:0009741	response to brassinosteroid	76	23	12.11	0.00023	7
BP	GO:0048589	developmental growth	243	62	38.73	0.00023	7
CC	GO:0140513	nuclear protein-containing complex	792	183	136.38	0.00024	7
CC	GO:0008541	proteasome regulatory particle, lid subcomplex	19	11	3.27	0.00024	7
MF	GO:1990538	xylan O-acetyltransferase activity	6	6	0.91	0.00025	7
BP	GO:0033674	positive regulation of kinase activity	78	20	12.43	0.00026	7
BP	GO:0071702	organic substance transport	1330	305	212	0.00027	7
BP	GO:0007030	Golgi organization	51	23	8.13	0.00027	7
BP	GO:0060260	regulation of transcription initiation by RNA polymerase II	18	11	2.87	0.0003	7
CC	GO:1904949	ATPase complex	146	54	25.14	0.0003	7
BP	GO:0048856	anatomical structure development	1240	231	197.66	0.00031	7
BP	GO:0031324	negative regulation of cellular metabolic process	463	98	73.8	0.00031	7
BP	GO:0071902	positive regulation of protein serine/threonine kinase activity	10	6	1.59	0.00036	7
MF	GO:0036002	pre-mRNA binding	22	11	3.35	0.00036	7
BP	GO:0010256	endomembrane system organization	131	46	20.88	0.00037	7
BP	GO:0046474	glycerophospholipid biosynthetic process	123	31	19.61	0.00038	7
BP	GO:0010363	regulation of plant-type hypersensitive response	6	5	0.96	0.00038	7
CC	GO:1905368	peptidase complex	189	66	32.54	0.00043	7
BP	GO:0006556	S-adenosylmethionine biosynthetic process	11	7	1.75	0.00044	7
BP	GO:0090376	seed trichome differentiation	91	31	14.51	0.00048	7
BP	GO:0072524	pyridine-containing compound metabolic process	327	74	52.12	0.00048	7
BP	GO:0032970	regulation of actin filament-based process	32	13	5.1	0.00048	7
BP	GO:0006491	N-glycan processing	9	7	1.43	0.00049	7
BP	GO:0046395	carboxylic acid catabolic process	244	57	38.89	0.00051	7
BP	GO:0071258	cellular response to gravity	8	6	1.28	0.00054	7
BP	GO:0019439	aromatic compound catabolic process	474	103	75.56	0.00054	7
BP	GO:0061013	regulation of mRNA catabolic process	51	17	8.13	0.00055	7
CC	GO:0005801	cis-Golgi network	21	11	3.62	0.00056	7
BP	GO:0010026	trichome differentiation	101	33	16.1	0.00058	7
BP	GO:0043487	regulation of RNA stability	52	17	8.29	0.00058	7
BP	GO:0048523	negative regulation of cellular process	606	127	96.6	0.00066	7
CC	GO:0005654	nucleoplasm	300	74	51.66	0.0007	7
BP	GO:0032784	regulation of DNA-templated transcription elongation	56	16	8.93	0.00071	7
BP	GO:0032272	negative regulation of protein polymerization	14	8	2.23	0.00072	7
BP	GO:0032504	multicellular organism reproduction	179	49	28.53	0.00073	7
BP	GO:0006401	RNA catabolic process	144	37	22.95	0.00079	7
CC	GO:0005768	endosome	336	122	57.86	0.00079	7
BP	GO:0031333	negative regulation of protein-containing complex assembly	14	8	2.23	0.00081	7
BP	GO:1901293	nucleoside phosphate biosynthetic process	238	55	37.94	0.00082	7
CC	GO:0055044	symplast	475	109	81.79	0.00083	7
BP	GO:0090407	organophosphate biosynthetic process	449	96	71.57	0.00085	7
BP	GO:0031334	positive regulation of protein-containing complex assembly	19	10	3.03	0.00086	7
BP	GO:0044272	sulfur compound biosynthetic process	150	39	23.91	0.00087	7
CC	GO:0070971	endoplasmic reticulum exit site	14	8	2.41	0.00089	7
BP	GO:0044089	positive regulation of cellular component biogenesis	21	10	3.35	0.00091	7
BP	GO:0045899	positive regulation of RNA polymerase II transcription preinitiation complex assembly	16	10	2.55	0.00096	7
BP	GO:0051254	positive regulation of RNA metabolic process	430	83	68.54	0.00103	7
BP	GO:0006065	UDP-glucuronate biosynthetic process	4	4	0.64	0.00103	7
BP	GO:0046500	S-adenosylmethionine metabolic process	19	9	3.03	0.00106	7
BP	GO:0006352	DNA-templated transcription initiation	118	27	18.81	0.00107	7
BP	GO:0032535	regulation of cellular component size	40	18	6.38	0.00107	7
BP	GO:0031325	positive regulation of cellular metabolic process	594	118	94.68	0.00114	7
BP	GO:0032940	secretion by cell	110	31	17.53	0.00115	7
BP	GO:0048364	root development	122	32	19.45	0.00117	7
CC	GO:0030054	cell junction	480	109	82.65	0.00122	7
CC	GO:0008023	transcription elongation factor complex	38	17	6.54	0.00128	7
CC	GO:0005783	endoplasmic reticulum	762	177	131.21	0.00189	7
CC	GO:0019866	organelle inner membrane	278	93	47.87	0.00222	7
CC	GO:0005747	mitochondrial respiratory chain complex I	50	31	8.61	0.00252	7
CC	GO:0005667	transcription regulator complex	1146	113	63.98	8.9e-24	8
BP	GO:0006351	DNA-templated transcription	2148	172	132.06	6.8e-21	8
BP	GO:0032774	RNA biosynthetic process	2161	172	132.85	1e-20	8
BP	GO:0010468	regulation of gene expression	2544	183	156.4	1.1e-17	8
MF	GO:0003677	DNA binding	2418	187	156.63	1.7e-16	8
BP	GO:0019438	aromatic compound biosynthetic process	2857	215	175.64	3.7e-16	8
BP	GO:0051252	regulation of RNA metabolic process	2244	176	137.96	5.5e-16	8
BP	GO:0010556	regulation of macromolecule biosynthetic process	2559	183	157.32	7.5e-15	8
BP	GO:0009813	flavonoid biosynthetic process	112	31	6.89	3.5e-14	8
BP	GO:0019219	regulation of nucleobase-containing compound metabolic process	2353	176	144.66	8.5e-14	8
BP	GO:0034654	nucleobase-containing compound biosynthetic process	2499	182	153.63	4.9e-13	8
BP	GO:0009812	flavonoid metabolic process	119	31	7.32	6.1e-13	8
BP	GO:0048869	cellular developmental process	408	61	25.08	3.2e-12	8
BP	GO:0018130	heterocycle biosynthetic process	2880	206	177.06	9.6e-12	8
MF	GO:0046906	tetrapyrrole binding	521	66	33.75	4.9e-10	8
BP	GO:2001141	regulation of RNA biosynthetic process	1979	168	121.67	8.4e-10	8
BP	GO:1901362	organic cyclic compound biosynthetic process	3081	220	189.41	5.4e-09	8
BP	GO:0006355	regulation of DNA-templated transcription	1979	168	121.67	8.8e-09	8
MF	GO:0008194	UDP-glycosyltransferase activity	420	56	27.21	2.7e-08	8
CC	GO:0005576	extracellular region	401	51	22.39	4.1e-08	8
BP	GO:0031326	regulation of cellular biosynthetic process	2580	183	158.61	5.2e-08	8
BP	GO:0010876	lipid localization	145	18	8.91	5.4e-08	8
BP	GO:0006468	protein phosphorylation	1798	124	110.54	1.2e-07	8
BP	GO:0042744	hydrogen peroxide catabolic process	112	20	6.89	2.2e-07	8
MF	GO:0005524	ATP binding	3111	176	201.52	2.5e-07	8
BP	GO:0045229	external encapsulating structure organization	365	27	22.44	6.3e-07	8
MF	GO:0043565	sequence-specific DNA binding	811	94	52.53	6.5e-07	8
MF	GO:0016747	acyltransferase activity, transferring groups other than amino-acyl groups	497	54	32.19	8.4e-07	8
BP	GO:0010143	cutin biosynthetic process	9	6	0.55	9.5e-07	8
BP	GO:0160062	cutin-based cuticle development	9	6	0.55	2.5e-06	8
MF	GO:0004672	protein kinase activity	1895	132	122.75	2.9e-06	8
BP	GO:0006869	lipid transport	133	18	8.18	3e-06	8
CC	GO:0043227	membrane-bounded organelle	8753	433	488.64	3.2e-06	8
CC	GO:0043231	intracellular membrane-bounded organelle	8725	432	487.08	3.4e-06	8
BP	GO:0043086	negative regulation of catalytic activity	186	23	11.43	4.3e-06	8
MF	GO:0005506	iron ion binding	422	48	27.34	4.6e-06	8
MF	GO:0140110	transcription regulator activity	1111	110	71.97	4.8e-06	8
BP	GO:0044092	negative regulation of molecular function	191	23	11.74	8.2e-06	8
BP	GO:0051171	regulation of nitrogen compound metabolic process	2991	197	183.88	1.1e-05	8
BP	GO:0009636	response to toxic substance	239	30	14.69	1.4e-05	8
MF	GO:0004857	enzyme inhibitor activity	188	28	12.18	1.4e-05	8
CC	GO:0071944	cell periphery	2308	174	128.85	1.8e-05	8
BP	GO:0070887	cellular response to chemical stimulus	851	63	52.32	2e-05	8
BP	GO:1990748	cellular detoxification	221	29	13.59	2.3e-05	8
CC	GO:0005835	fatty acid synthase complex	47	8	2.62	3.3e-05	8
BP	GO:0009889	regulation of biosynthetic process	2593	184	159.41	4.1e-05	8
CC	GO:0009579	thylakoid	379	21	21.16	4.4e-05	8
BP	GO:0060255	regulation of macromolecule metabolic process	3143	205	193.23	6e-05	8
BP	GO:0006855	xenobiotic transmembrane transport	36	11	2.21	6.6e-05	8
BP	GO:0055085	transmembrane transport	1595	129	98.06	7e-05	8
BP	GO:0015074	DNA integration	79	9	4.86	7.8e-05	8
BP	GO:0042908	xenobiotic transport	69	14	4.24	0.0001	8
BP	GO:0044271	cellular nitrogen compound biosynthetic process	3734	218	229.56	0.00012	8
MF	GO:0003700	DNA-binding transcription factor activity	985	108	63.81	0.00012	8
MF	GO:0030554	adenyl nucleotide binding	3615	188	234.17	0.00012	8
BP	GO:0098754	detoxification	225	29	13.83	0.00013	8
MF	GO:0016405	CoA-ligase activity	31	7	2.01	0.00014	8
MF	GO:0016709	oxidoreductase activity, acting on paired donors, with incorporation or reduction of molecular oxygen, NAD(P)H as one donor, and incorporation of one atom of oxygen	182	33	11.79	0.00025	8
MF	GO:0045486	naringenin 3-dioxygenase activity	9	6	0.58	0.00026	8
BP	GO:0097237	cellular response to toxic substance	221	29	13.59	0.0003	8
BP	GO:0009826	unidimensional cell growth	175	16	10.76	0.00033	8
BP	GO:0016070	RNA metabolic process	3468	198	213.21	0.00034	8
BP	GO:0015858	nucleoside transport	25	4	1.54	0.00042	8
BP	GO:0042197	halogenated hydrocarbon metabolic process	63	9	0.48	6.1e-10	9
BP	GO:0042726	flavin-containing compound metabolic process	82	9	0.62	1.5e-09	9
BP	GO:0006793	phosphorus metabolic process	3618	56	27.52	3.5e-09	9
BP	GO:0006805	xenobiotic metabolic process	89	9	0.68	3.3e-08	9
BP	GO:0019637	organophosphate metabolic process	1010	24	7.68	1.9e-07	9
BP	GO:0009410	response to xenobiotic stimulus	89	9	0.68	2.8e-07	9
BP	GO:0071466	cellular response to xenobiotic stimulus	89	9	0.68	1.3e-06	9
BP	GO:0042594	response to starvation	78	7	0.59	4.4e-06	9
BP	GO:0009267	cellular response to starvation	66	7	0.5	6.2e-06	9
MF	GO:0016788	hydrolase activity, acting on ester bonds	1132	31	8.7	1.4e-05	9
BP	GO:0031668	cellular response to extracellular stimulus	87	7	0.66	2.5e-05	9
BP	GO:0044281	small molecule metabolic process	3716	46	28.27	2.9e-05	9
MF	GO:0042578	phosphoric ester hydrolase activity	463	24	3.56	3.1e-05	9
MF	GO:0016787	hydrolase activity	3863	54	29.7	3.5e-05	9
BP	GO:0006766	vitamin metabolic process	310	13	2.36	6e-05	9
BP	GO:0071496	cellular response to external stimulus	88	7	0.67	7.3e-05	9

## Sheet: S1H_TF-DEG_Subnetwork
Gene_Id	GeneNamesInFigure3	TF family	Best Arabidopsis hit	Time Bin	Degree	Betweenness	Page rank	NeighborhoodConnectivity	NumberOfUndirectedEdges	Nitrogen-specificity Index	Remarks	Cluster
Potra2n4c10189	Potra2n4c10189 (FD3)		AT2G27510	2h	177	0.00440738	0.00178196	68.9434	177		DEG in this study	Cluster6
Potra2n4c9696	Potra2n4c9696 (NIR1)		AT2G15620	4h	159	0.00280757	0.00185612	71.567	159		DEG in this study and Nitrogen metabolism gene	Cluster6
Potra2n9c18689	Potra2n9c18689		AT2G27510	2h	157	0.0017648	0.0016313	69.0192	157		DEG in this study	Cluster6
Potra2n1c2237	Potra2n1c2237 (SIR1b)		AT5G04590	2h	155	0.00573202	0.00134427	65.1091	155		DEG in this study and Nitrogen metabolism gene	Cluster6
Potra2n1c1954	Potra2n1c1954 (CIPK3)		AT2G26980	2h	152	0.00473139	0.00170342	67.15	152		DEG in this study	Cluster6
Potra2n1c3307	Potra2n1c3307		AT1G17110	2h	152	0.00595432	0.00148365	67.2857	152		DEG in this study	Cluster6
Potra2n15c28480	Potra2n15c28480 (NRT2.5c)		AT1G12940	2h	151	0.00600472	0.00166493	66.2772	151		DEG in this study and Nitrogen metabolism gene	Cluster6
Potra2n5c11357	Potra2n5c11357		AT1G22170	2h	150	0.00216155	0.00161528	71.0323	150		DEG in this study	Cluster6
Potra2n1c685	Potra2n1c685 (BHLH14)	bHLH	AT4G00870	2h	147	0.00916842	0.00162681	62.9417	147		TF and DEG in this study	Cluster6
Potra2n4c9465	Potra2n4c9465 (MDH)		AT3G47520	2h	141	0.0016165	0.00167523	71.3265	141		DEG in this study	Cluster6
Potra2n2c5606	Potra2n2c5606 (NR2a)		AT1G37130	4h	141	0.00283555	0.00149939	69.3085	141		DEG in this study and Nitrogen metabolism gene	Cluster6
Potra2n14c27006	Potra2n14c27006 (CYSC1)		AT3G61440	2h	140	0.00138217	0.00198637	70.2784	140		DEG in this study	Cluster6
Potra2n5c10502	Potra2n5c10502 (PLATZ1)	ZnF-B	AT1G21000	2h	140	0.00246663	0.00135583	70.5455	140		TF and DEG in this study	Cluster6
Potra2n1c494	Potra2n1c494 (G6PD2)		AT5G13110	2h	138	0.00186414	0.00204464	70.37	138		DEG in this study	Cluster6
Potra2n14c27393	Potra2n14c27393 (SAG21)		AT4G02380	2h	136	0.00133433	0.00182204	70.1429	136		DEG in this study	Cluster6
Potra2n4c10074	Potra2n4c10074 (CYP94C1)		AT2G27690	2h	136	0.0138692	0.00161952	56.2927	136		DEG in this study	Cluster6
Potra2n3c7064	Potra2n3c7064		AT3G16560	2h	136	0.0039391	0.00154434	65.0189	136		DEG in this study	Cluster6
Potra2n4c9824	Potra2n4c9824 (RL6)	MYB_related	AT1G75250		136	0.00616601	0.00135518	66.6071	136		TF	Cluster6
Potra2n5c11037	Potra2n5c11037 (CAND3)		AT3G59090	2h	135	0.001116	0.00160075	71.3333	135		DEG in this study	Cluster6
Potra2n1c2120	Potra2n1c2120		AT2G29260	2h	135	0.00102202	0.00134508	72.6	135		DEG in this study	Cluster6
Potra2n6c15061	Potra2n6c15061		AT3G10180	4h	135	0.00718816	0.00105647	71.7222	135		DEG in this study	Cluster4
Potra2n15c29065	Potra2n15c29065 (B3)	B3			135	0.0015178	0.00162483	71.3218	135		TF	Cluster6
Potra2n3c6974	Potra2n3c6974 (G6PD2)		AT5G13110	2h	134	0.0021609	0.00147599	68.9425	134		DEG in this study	Cluster6
Potra2n17c31530	Potra2n17c31530		AT5G64290	2h	134	0.00112481	0.00163745	69.871	134		DEG in this study	Cluster6
Potra2n700s36526	Potra2n700s36526		AT5G40850	2h	133	0.00205721	0.00123059	69.7174	133		DEG in this study	Cluster6
Potra2n12c23847	Potra2n12c23847 (FLA12)		AT5G60490	4h	133	0.00348701	0.000942821	73.6364	133		DEG in this study	Cluster4
Potra2n14c26485	Potra2n14c26485		AT3G53010	4h	132	0.00259719	0.000978451	74.1124	132		DEG in this study	Cluster4
Potra2n3c7270	Potra2n3c7270 (PGD3)		AT5G41670	2h	131	0.00196533	0.00182454	72.2128	131		DEG in this study	Cluster6
Potra2n1c3762	Potra2n1c3762 (GALT31A)		AT1G32930	4h	131	0.00543705	0.000952757	69.4176	131		DEG in this study	Cluster4
Potra2n9c19357	Potra2n9c19357		AT1G49960	4h	131	0.00550205	0.000764712	71.117	131		DEG in this study	Cluster4
Potra2n7c16357	Potra2n7c16357		AT4G36790	4h	131	0.00189685	0.00131926	72.809	131		DEG in this study	Cluster4
Potra2n9c19486	Potra2n9c19486 (NOXY38)		AT3G52140	2h	128	0.000985996	0.000936078	72.1935	128		DEG in this study	Cluster6
Potra2n9c19654	Potra2n9c19654 (MATE)		AT1G51340	2h	128	0.00503577	0.00105965	69.5595	128		DEG in this study	Cluster6
Potra2n1c3259	Potra2n1c3259 (RFNR1)		AT4G05390	2h	127	0.00146959	0.00184326	71.0309	127		DEG in this study	Cluster6
Potra2n1c496	Potra2n1c496 (ACR4)		AT1G69040	2h	127	0.000980669	0.00168037	69.7368	127		DEG in this study	Cluster6
Potra2n9c19481	Potra2n9c19481 (bHLH4)	bHLH	AT2G42280	2h	127	0.00232935	0.00120893	69.4643	127		TF and DEG in this study	Cluster6
Potra2n2c5528	Potra2n2c5528		AT5G09430	4h	127	0.00291109	0.000767144	73.1023	127		DEG in this study	Cluster4
Potra2n9c19145	Potra2n9c19145 (PDV2)		AT2G16070	2h	126	0.00202619	0.00185467	69.4217	126		DEG in this study	Cluster6
Potra2n15c29208	Potra2n15c29208 (KPI-2)		AT4G01575	4h	126	0.00323227	0.000910583	69.3298	126		DEG in this study	Cluster4
Potra2n4c9841	Potra2n4c9841 (SFH3)		AT2G21540	4h	126	0.000851727	0.000919783	74.9195	126		DEG in this study	Cluster4
Potra2n10c21724	Potra2n10c21724 (FL2)		AT3G22810	4h	125	0.00815281	0.000958569	70.5333	125		DEG in this study	Cluster4
Potra2n12c24301	Potra2n12c24301 (EB1B)		AT5G62500	4h	125	0.00103615	0.00116032	73.8315	125		DEG in this study	Cluster4
Potra2n2c4957	Potra2n2c4957		AT5G41340	2h	124	0.000926321	0.00117999	72.6747	124		DEG in this study	Cluster6
Potra2n17c31708	Potra2n17c31708 (RCI3)		AT1G05260	4h	124	0.0080513	0.00260025	47.35	124		DEG in this study	Cluster5
Potra2n4c9507	Potra2n4c9507 (BR6OX1)		AT5G38970	4h	124	0.00262461	0.00125943	73.1705	124		DEG in this study	Cluster4
Potra2n11c23397	Potra2n11c23397		AT1G61350	4h	124	0.00167318	0.00079709	73.7727	124		DEG in this study	Cluster4
Potra2n5c11320	Potra2n5c11320 (NR2b)		AT1G37130	2h	123	0.00211431	0.00183474	67.2235	123		DEG in this study and Nitrogen metabolism gene	Cluster6
Potra2n2c5705	Potra2n2c5705 (ACO5)		AT1G77330	4h	123	0.001527	0.00119477	73.4286	123		DEG in this study	Cluster4
Potra2n4c10260	Potra2n4c10260 (FLA12)		AT5G60490	4h	123	0.00112615	0.00142296	73.5618	123		DEG in this study	Cluster4
Potra2n5c11114	Potra2n5c11114 (RNR1)		AT2G21790	4h	123	0.00252908	0.000671299	73.5056	123		DEG in this study	Cluster4
Potra2n9c19066	Potra2n9c19066			4h	123	0.000812387	0.00134388	74.2135	123		DEG in this study	Cluster4
Potra2n7c16290	Potra2n7c16290		AT3G50560	4h	123	0.0029517	0.000880637	74.9419	123		DEG in this study	Cluster4
Potra2n5c10985	Potra2n5c10985		AT4G02830	4h	122	0.00312575	0.000812605	72.125	122		DEG in this study	Cluster4
Potra2n9c19336	Potra2n9c19336 (RSL2)	bHLH	AT4G33880		122	0.0103786	0.00130434	65.1026	122		TF	Cluster6
Potra2n9c19920	Potra2n9c19920 (CNX2)		AT2G31955	2h	121	0.00372191	0.00068187	69	121		DEG in this study	Cluster6
Potra2n14c27704	Potra2n14c27704 (FDH)		AT5G14780	4h	121	0.00520639	0.00111134	61.5581	121		DEG in this study	Cluster6
Potra2n15c28643	Potra2n15c28643 (ATNITR2;1)		AT5G62720	2h	120	0.00110386	0.00143369	71.4146	120		DEG in this study	Cluster6
Potra2n2c5687	Potra2n2c5687		AT1G77410	4h	120	0.00056479	0.0012898	72.2584	120		DEG in this study	Cluster4
Potra2n3c7593	Potra2n3c7593			4h	120	0.00213667	0.000541087	73.2111	120		DEG in this study	Cluster4
Potra2n15c29069	Potra2n15c29069 (B3)	B3			120	0.0039242	0.00164664	70.6	120		TF	Cluster6
Potra2n1c2361	Potra2n1c2361 (HOT5)		AT5G43940	2h	119	0.00202185	0.00129198	68.0349	119		DEG in this study	Cluster6
Potra2n7c15924	Potra2n7c15924			4h	119	0.00200636	0.000914897	72.6667	119		DEG in this study	Cluster4
Potra2n7c16256	Potra2n7c16256 (MAPKKK19)		AT5G67080	2h	118	0.00710307	0.000886977	60.7111	118		DEG in this study	Cluster6
Potra2n5c11223	Potra2n5c11223 (ACO5)		AT1G77330	4h	118	0.00180678	0.000620293	73.618	118		DEG in this study	Cluster4
Potra2n10c22278	Potra2n10c22278		AT4G15910	4h	118	0.00087082	0.000787394	73.9655	118		DEG in this study	Cluster4
Potra2n8c17679	Potra2n8c17679		AT1G68780	4h	118	0.00269317	0.000924315	75.6627	118		DEG in this study	Cluster4
Potra2n10c20389	Potra2n10c20389 (bZIP)	bZIP	AT3G54870	4h	117	0.00139149	0.00117246	76.6951	117		TF and DEG in this study	Cluster4
Potra2n9c19656	Potra2n9c19656 (TZF8)	C3H	AT5G12850	4h	117	0.00164882	0.000568456	73.2809	117		TF and DEG in this study	Cluster4
Potra2n1c2150	Potra2n1c2150		AT3G11320	4h	117	0.000908291	0.00123972	78.425	117		DEG in this study	Cluster4
Potra2n12c24414	Potra2n12c24414		AT5G62960	4h	117	0.00253232	0.00203797	51.3143	117		DEG in this study	Cluster5
Potra2n4c9506	Potra2n4c9506		AT1G13680	4h	116	0.000561716	0.00147274	77.3537	116		DEG in this study	Cluster4
Potra2n15c28441	Potra2n15c28441 (NRT3.1c)		AT5G50200	2h	115	0.000690723	0.00172082	71.7711	115		DEG in this study and Nitrogen metabolism gene	Cluster6
Potra2n1c2551	Potra2n1c2551 (WLIM1)	LIM	AT1G10200	4h	115	0.00270742	0.000786981	73.1605	115		TF and DEG in this study	Cluster4
Potra2n5c11091	Potra2n5c11091 (CEK3)		AT4G09760	2h	114	0.00399651	0.00126736	65.7857	114		DEG in this study	Cluster6
Potra2n2c4551	Potra2n2c4551		AT4G02425	2h	114	0.000930438	0.00118529	72.4286	114		DEG in this study	Cluster6
Potra2n13c25019	Potra2n13c25019 (emb1354)		AT3G01610	4h	114	0.000717723	0.00141625	78.4557	114		DEG in this study	Cluster4
Potra2n9c20009	Potra2n9c20009 (FLA12)		AT5G60490	4h	114	0.000353538	0.00173497	74.1011	114		DEG in this study	Cluster4
Potra2n10c21764	Potra2n10c21764			4h	114	0.000837875	0.00183995	72.0899	114		DEG in this study	Cluster4
Potra2n4c9127	Potra2n4c9127 (SCL8)	GRAS	AT5G52510		114	0.00147806	0.000872448	75.8125	114		TF	Cluster4
Potra2n1c2895	Potra2n1c2895 (CLC-B)		AT3G27170	2h	113	0.00180451	0.00139285	71.7831	113		DEG in this study	Cluster6
Potra2n7c15864	Potra2n7c15864		AT5G10350	2h	113	0.000856118	0.00106162	73.9067	113		DEG in this study	Cluster6
Potra2n17c31519	Potra2n17c31519		AT5G64250	2h	113	0.00102103	0.00124805	74.1125	113		DEG in this study	Cluster6
Potra2n13c25021	Potra2n13c25021 (FLA12)		AT5G60490	4h	113	0.000644043	0.00109138	77.9375	113		DEG in this study	Cluster4
Potra2n1c463	Potra2n1c463 (AGM1)		AT1G27930	4h	113	0.00163374	0.00113707	76.6627	113		DEG in this study	Cluster4
Potra2n4c8834	Potra2n4c8834		AT4G18425	4h	113	0.00202124	0.00184325	49.6575	113		DEG in this study	Cluster5
Potra2n1c3485	Potra2n1c3485		AT1G28280	4h	113	0.00209223	0.000844395	74.4118	113		DEG in this study	Cluster4
Potra2n6c15087	Potra2n6c15087 (BHLH38)	bHLH	AT3G56970		113	0.00759666	0.000899279	71.8205	113		TF	Cluster6
Potra2n5c10819	Potra2n5c10819 (NDR2)		AT1G03920	4h	112	0.00187822	0.000609762	73.8605	112		DEG in this study	Cluster4
Potra2n16c29649	Potra2n16c29649		AT2G05990	4h	112	0.000297949	0.00099537	77.3544	112		DEG in this study	Cluster4
Potra2n1c827	Potra2n1c827 (MDAR6)		AT1G63940	2h	111	0.000444352	0.00157721	73.6	111		DEG in this study	Cluster6
Potra2n17c30664	Potra2n17c30664 (UGP2)		AT5G17310	4h	111	0.000956217	0.00123725	74.3721	111		DEG in this study	Cluster4
Potra2n6c15114	Potra2n6c15114 (HSP23.6-MITO)		AT4G25200	4h	111	0.00434832	0.000469636	71.2921	111		DEG in this study	Cluster4
Potra2n18c32565	Potra2n18c32565 (ASP2)		AT5G19550	2h	110	0.00137693	0.00119336	72.3766	110		DEG in this study and Nitrogen metabolism gene	Cluster6
Potra2n19c33457	Potra2n19c33457 (bHLH)	bHLH	AT4G20970	2h	110	0.0105237	0.00162604	58.5352	110		TF and DEG in this study	Cluster6
Potra2n15c29105	Potra2n15c29105 (FLA12)		AT5G60490	4h	110	0.000472768	0.00163077	76.494	110		DEG in this study	Cluster4
Potra2n19c34115	Potra2n19c34115 (BTL06)	C2H2	AT1G55530	4h	110	0.00111703	0.00160146	73.4659	110		TF and DEG in this study	Cluster4
Potra2n1c922	Potra2n1c922 (CYP76C6)		AT1G33720	4h	110	0.000562558	0.00143017	77.2317	110		DEG in this study	Cluster4
Potra2n4c9690	Potra2n4c9690		AT1G49740	4h	110	0.00143812	0.00188328	51.2222	110		DEG in this study	Cluster5
Potra2n5c11771	Potra2n5c11771		AT3G51150	4h	110	0.000112987	0.00119494	77.241	110		DEG in this study	Cluster4
Potra2n10c21057	Potra2n10c21057 (AP1)	MIKC_MADS	AT1G69120		110	0.00330601	0.000898803	74.0706	110		TF	Cluster4
Potra2n1c2860	Potra2n1c2860 (AGL8)*	MIKC_MADS	AT5G60910		110	0.000263897	0.000648252	78.013	110		TF	Cluster4
Potra2n1c796	Potra2n1c796 (PGD3)		AT5G41670	2h	109	0.000412839	0.0015091	74.5181	109		DEG in this study	Cluster6
Potra2n19c33344	Potra2n19c33344 (FLA12)		AT5G60490	4h	109	0.000219854	0.00144662	77.9872	109		DEG in this study	Cluster4
Potra2n15c28440	Potra2n15c28440 (NRT3.1b)		AT5G50200	2h	108	0.00045774	0.00198443	69.8652	108		DEG in this study and Nitrogen metabolism gene	Cluster6
Potra2n680s36424	Potra2n680s36424 (CASPL2A1)		AT1G17200	4h	108	0.00106924	0.000705815	76.3457	108		DEG in this study	Cluster4
Potra2n3c8098	Potra2n3c8098		AT1G17620	4h	108	0.00429451	0.00123943	47.56	108		DEG in this study	Cluster5
Potra2n5c11659	Potra2n5c11659 (BLH2)	HB-other	AT4G36870		108	0.00298614	0.000711329	73.9157	108		TF	Cluster4
Potra2n3c7785	Potra2n3c7785			4h	107	0.000769004	0.00123882	74.6163	107		DEG in this study	Cluster4
Potra2n3c6472	Potra2n3c6472		AT5G56350	4h	106	0.000346026	0.00139574	74.0595	106		DEG in this study	Cluster4
Potra2n1c3191	Potra2n1c3191 (WRKY20)	WRKY	AT4G26640		106	0.00216761	0.00109269	73.8846	106		TF	Cluster4
Potra2n5c12621	Potra2n5c12621		AT5G27760	2h	105	0.00114806	0.00146675	72.1216	105		DEG in this study	Cluster6
Potra2n17c31035	Potra2n17c31035 (RRT1)		AT5G15740	4h	105	0.000160015	0.00129889	78.9221	105		DEG in this study	Cluster4
Potra2n6c13626	Potra2n6c13626		AT1G65870	4h	105	0.000350854	0.00130525	77.7848	105		DEG in this study	Cluster4
Potra2n4c9412	Potra2n4c9412 (CYP82G1)		AT3G25180	4h	104	0.00955736	0.00158602	41.8406	104		DEG in this study	Cluster6
Potra2n15c29077	Potra2n15c29077 (NGA4)	B3	AT4G01500		104	0.00374466	0.0010524	75.0417	104		TF	Cluster4
Potra2n9c19330	Potra2n9c19330 (LBD38)	LBD	AT3G49940	2h	103	0.00157588	0.000591099	71.44	103		TF and DEG in this study	Cluster6
Potra2n2c6137	Potra2n2c6137		AT1G19600	2h	103	0.0151204	0.00127691	69.7424	103		DEG in this study	Cluster6
Potra2n14c27117	Potra2n14c27117 (RMF)*	C2H2	AT3G61730	4h	103	0.000131077	0.00110122	78.1899	103		TF and DEG in this study	Cluster4
Potra2n16c30512	Potra2n16c30512 (CYP71A22)		AT3G48310	4h	103	0.00217209	0.00168117	51.2687	103		DEG in this study	Cluster6
Potra2n14c26346	Potra2n14c26346		AT2G22620	4h	103	0.000553452	0.00148199	77.2785	103		DEG in this study	Cluster4
Potra2n8c17636	Potra2n8c17636			4h	103	0.00227297	0.00147239	74.9881	103		DEG in this study	Cluster4
Potra2n2c6109	Potra2n2c6109 (NAC074)	NAC	AT4G28530	4h	102	0.00164534	0.00148532	49.7188	102		TF and DEG in this study	Cluster5
Potra2n1c1053	Potra2n1c1053		AT4G17260	2h	101	0.0010366	0.00094746	77.1176	101		DEG in this study	Cluster6
Potra2n18c32725	Potra2n18c32725		AT1G74960	4h	101	0.00229572	0.0011147	74.6027	101		DEG in this study	Cluster4
Potra2n1c478	Potra2n1c478		AT1G27290	4h	101	0.00188575	0.00190034	48.4595	101		DEG in this study	Cluster5
Potra2n18c32976	Potra2n18c32976		AT4G30380	4h	101	0.00496199	0.00216613	48.6528	101		DEG in this study	Cluster5
Potra2n10c21884	Potra2n10c21884 (MYB305)	MYB	AT3G24310		101	0.00274314	0.000996255	77.5821	101		TF	Cluster4
Potra2n673s36378	Potra2n673s36378 (TGA1)	bZIP	AT5G65210		101	0.00426023	0.00194622	41.3382	101		TF and Nitrate responsive TF [2, 3]	Cluster5
Potra2n12c23912	Potra2n12c23912 (GLT1a)		AT5G53460	2h	100	0.0027287	0.00130014	64.5735	100		DEG in this study and Nitrogen metabolism gene	Cluster6
Potra2n6c15083	Potra2n6c15083 (GLU1a)		AT5G04140	2h	100	0.00106022	0.00106574	75.3478	100		DEG in this study and Nitrogen metabolism gene	Cluster6
Potra2n7c15464	Potra2n7c15464 (RING1B)	C2H2	AT1G03770	2h	100	0.00272632	0.000658742	74.6282	100		TF and DEG in this study	Cluster6
Potra2n9c19776	Potra2n9c19776		AT5G58960	4h	99	0.00550764	0.000968111	76.3731	99		DEG in this study	Cluster4
Potra2n15c27976	Potra2n15c27976 (PAE9)		AT5G23870	2h	97	0.00067212	0.00112922	74.5968	97		DEG in this study	Cluster6
Potra2n11c23325	Potra2n11c23325 (bHLH)	bHLH	AT4G20970	4h	97	0.00772922	0.00151924	37.2063	97		TF and DEG in this study	Cluster6
Potra2n19c33346	Potra2n19c33346 (FLA11)		AT5G03170	4h	97	0.000311942	0.00108634	78.7532	97		DEG in this study	Cluster4
Potra2n197s34862	Potra2n197s34862 (GRAS)	GRAS	AT3G13840		97	0.00116169	0.000303684	75.4321	97		TF	Cluster4
Potra2n1c3303	Potra2n1c3303 (ATGA2OX1)		AT1G78440	2h	96	0.00228096	0.00125484	65.6232	96		DEG in this study	Cluster6
Potra2n2c4565	Potra2n2c4565 (SAG21)		AT4G02380	2h	96	0.00273749	0.000930048	63.6866	96		DEG in this study	Cluster6
Potra2n3c6894	Potra2n3c6894 (NCED6)		AT3G24220	4h	96	0.00185561	0.000976009	75.9701	96		DEG in this study	Cluster4
Potra2n2c6308	Potra2n2c6308		AT5G42210	4h	96	0.000973805	0.00162673	52.5909	96		DEG in this study	Cluster5
Potra2n9c19762	Potra2n9c19762 (DIV1)	MYB_related	AT5G58900		96	0.00149783	0.000960788	74.7656	96		TF	Cluster6
Potra2n10c20603	Potra2n10c20603 (PHD)*	PHD	AT2G16050	4h	95	0.000449148	0.00218703	51.0441	95		TF and DEG in this study	Cluster5
Potra2n8c18092	Potra2n8c18092 (APS1)		AT3G22890	4h	95	0.00717006	0.00143155	41.3492	95		DEG in this study	Cluster6
Potra2n8c17168	Potra2n8c17168			4h	95	0.000450201	0.00139096	53.2857	95		DEG in this study	Cluster5
Potra2n3c7124	Potra2n3c7124			4h	94	0.00323273	0.00138747	48.0571	94		DEG in this study	Cluster5
Potra2n9c18813	Potra2n9c18813		AT2G27830	4h	94	0.0028969	0.00174724	47.7385	94		DEG in this study	Cluster5
Potra2n7c16268	Potra2n7c16268 (HSF4)	HSF	AT4G36990		94	0.00158001	0.000901455	49.2429	94		TF	Cluster5
Potra2n4c10071	Potra2n4c10071		AT4G33790	4h	93	0.0020823	0.00112609	48.971	93		DEG in this study	Cluster5
Potra2n1c1591	Potra2n1c1591		AT1G52330	4h	93	0.00105909	0.00211979	51.6087	93		DEG in this study	Cluster5
Potra2n1c2007	Potra2n1c2007		AT2G44260	4h	93	0.00123348	0.00148254	51.4462	93		DEG in this study	Cluster5
Potra2n3c7314	Potra2n3c7314 (BEL1)	HB-other	AT5G41410		93	0.00139588	0.000553275	77.8657	93		TF	Cluster4
Potra2n650s36268	Potra2n650s36268 (HOT5)		AT5G43940	2h	92	0.0017548	0.000610474	67.2958	92		DEG in this study	Cluster6
Potra2n9c19157	Potra2n9c19157 (CYP82C4)		AT4G31940	4h	92	0.00453317	0.000940184	47.9167	92		DEG in this study	Cluster6
Potra2n15c28122	Potra2n15c28122		AT5G62350	8h	92	0.00184529	0.00172685	51.1385	92		DEG in this study	Cluster5
Potra2n6c13197	Potra2n6c13197 (CCD1)		AT3G63520	4h	91	0.00160306	0.00163579	50.5147	91		DEG in this study	Cluster5
Potra2n5c11769	Potra2n5c11769 (BBX18)*	DBB	AT2G21320		91	0.00018126	0.000889504	81.5902	91		TF	Cluster4
Potra2n11c22478	Potra2n11c22478 (CYP716A1)		AT5G36110	4h	90	0.00385936	0.00128095	45.9062	90		DEG in this study	Cluster6
Potra2n15c28127	Potra2n15c28127 (GH9B6)		AT1G23210	4h	90	0.00160201	0.00189439	49.3151	90		DEG in this study	Cluster5
Potra2n16c29729	Potra2n16c29729 (PGAZAT)		AT2G41850	4h	90	0.000328245	0.00179891	52.1429	90		DEG in this study	Cluster5
Potra2n18c32188	Potra2n18c32188		AT5G33280	4h	90	0.00372723	0.000722426	51.3231	90		DEG in this study	Cluster6
Potra2n10c20792	Potra2n10c20792		AT5G05480	2h	89	0.000463697	0.00097606	75.6066	89		DEG in this study	Cluster6
Potra2n6c14312	Potra2n6c14312		AT3G52870	4h	89	0.00481163	0.00089502	36.1967	89		DEG in this study	Cluster6
Potra2n7c15824	Potra2n7c15824 (ATAF1)#	NAC	AT1G01720	2h	88	0.0010801	0.000589641	70.0161	88	1.37089e-05	TF, DEG in this study and Nitrate responsive TF [2, 3]	Cluster6
Potra2n3c7135	Potra2n3c7135 (ERF105)#	AP2	AT5G51190	4h	88	0.00782876	0.000974357	36.1695	88	0.00144931	TF and DEG in this study	Cluster6
Potra2n10c22086	Potra2n10c22086 (BPEP)	bHLH	AT1G59640		88	0.00626161	0.000889384	65.1935	88		TF	Cluster6
Potra2n2c5326	Potra2n2c5326 (STZ)	C2H2	AT1G27730		88	0.00418849	0.000888332	43.3385	88		TF	Cluster6
Potra2n9c19227	Potra2n9c19227 (RRTF1)	ERF	AT4G34410		88	0.00196752	0.000635019	70.5077	88		TF	Cluster6
Potra2n1c1360	Potra2n1c1360 (ACX1)		AT4G16760	4h	87	0.00242312	0.00149156	48.4375	87		DEG in this study	Cluster6
Potra2n3c7089	Potra2n3c7089		AT4G20170	4h	87	2.08098e-05	0.00141636	79.5789	87		DEG in this study	Cluster4
Potra2n10c20602	Potra2n10c20602		AT2G16050	8h	87	0.00412777	0.00218404	51.1549	87		DEG in this study	Cluster5
Potra2n11c22789	Potra2n11c22789 (NAC045)	NAC	AT3G03200		87	0.00302615	0.000317304	75.5915	87		TF	Cluster4
Potra2n1c723	Potra2n1c723 (NLP7a)#	Nin-like	AT4G24020	2h	86	0.00294831	0.00116257	71.3559	86	0.00144931	TF, DEG in this study, Nitrate Signaling, and Nitrate responsive TF [2, 3]	Cluster6
Potra2n15c28464	Potra2n15c28464 (CuAO-zeta)		AT2G42490	4h	86	0.00603669	0.00148934	41.7879	86		DEG in this study	Cluster6
Potra2n10c22155	Potra2n10c22155		AT5G18980	8h	86	0.000653504	0.00194394	52.0968	86		DEG in this study	Cluster5
Potra2n4c9502	Potra2n4c9502 (IRX6)		AT5G15630	4h	85	1.56924e-05	0.00154712	79.5	85		DEG in this study	Cluster4
Potra2n16c29905	Potra2n16c29905		AT2G36020	4h	85	0.0012753	0.00137522	50.619	85		DEG in this study	Cluster5
Potra2n2c4494	Potra2n2c4494		AT5G35735	4h	85	0.00481508	0.000798836	37.4194	85		DEG in this study	Cluster6
Potra2n2c5243	Potra2n2c5243 (RBP47C)		AT1G47490	2h	84	0.000190088	0.00102586	79.3922	84		DEG in this study	Cluster6
Potra2n8c16718	Potra2n8c16718		AT5G13750	2h	84	0.00218484	0.000965394	61.8909	84		DEG in this study	Cluster6
Potra2n8c18351	Potra2n8c18351		AT3G26590	4h	84	0.0123889	0.000711023	63.9508	84		DEG in this study	Cluster6
Potra2n8c18298	Potra2n8c18298 (MYB40)*	MYB	AT5G14340		84	0.000999593	0.000999747	77.4717	84		TF	Cluster6
Potra2n16c29236	Potra2n16c29236		AT5G56190	4h	83	0.000391704	0.000280702	79.1045	83		DEG in this study	Cluster4
Potra2n5c10826	Potra2n5c10826 (NAC074)*	NAC	AT4G28530	8h	83	0.000368518	0.00184023	52.1967	83		TF and DEG in this study	Cluster5
Potra2n1c1484	Potra2n1c1484		AT1G17430	8h	83	0.00132005	0.00137613	54.8644	83		DEG in this study	Cluster5
Potra2n5c11625	Potra2n5c11625 (MAPKKK5)		AT5G66850	2h	82	0.00138715	0.000620278	71.9259	82		DEG in this study	Cluster6
Potra2n2c6238	Potra2n2c6238 (GASA1)		AT1G75750	4h	82	0.000220663	0.00155301	53.4754	82		DEG in this study	Cluster5
Potra2n8c18476	Potra2n8c18476		AT5G18980	4h	82	0.00103199	0.00107181	55.0357	82		DEG in this study	Cluster5
Potra2n15c28518	Potra2n15c28518		AT5G62960	4h	81	0.000237288	0.00177743	51.8955	81		DEG in this study	Cluster5
Potra2n4c9255	Potra2n4c9255 (GeBP)*	GeBP	AT3G04930		81	0.000593447	0.000614794	78.2679	81		TF	Cluster4
Potra2n14c27340	Potra2n14c27340 (BCP1)	PHD	AT4G02110	2h	79	0.00303389	0.000696806	76.5091	79		TF and DEG in this study	Cluster6
Potra2n12c23757	Potra2n12c23757		AT5G54130	2h	79	0.000873766	0.000902373	75.0816	79		DEG in this study	Cluster6
Potra2n3c6530	Potra2n3c6530		AT1G55230	4h	79	0.0154971	0.00136824	34.451	79		DEG in this study	Cluster5
Potra2n2c4800	Potra2n2c4800 (MYC2)	bHLH	AT1G32640		79	0.00326008	0.00114351	48.5833	79		TF	Cluster6
Potra2n14c26522	Potra2n14c26522 (SBT1.9)		AT5G67090	4h	78	0.000458419	0.00171283	55.4	78		DEG in this study	Cluster5
Potra2n9c19489	Potra2n9c19489		AT5G48060	4h	78	0.0088165	0.000611178	72.4068	78		DEG in this study	Cluster4
Potra2n18c33092	Potra2n18c33092 (WRKY40)#	WRKY	AT1G80840	4h	77	0.00677874	0.00110346	36.1607	77	1.37089e-05	TF, DEG in this study and Nitrate responsive TF [2, 3]	Cluster6
Potra2n6c13118	Potra2n6c13118		AT2G25620	4h	77	0.000795102	0.00129115	58.1636	77		DEG in this study	Cluster6
Potra2n1c2577	Potra2n1c2577 (STZ)	C2H2	AT1G27730	8h	77	0.00127688	0.000652164	51.6316	77		TF and DEG in this study	Cluster5
Potra2n16c29878	Potra2n16c29878 (BLH1)	TALE	AT2G35940		77	0.00461026	0.00127998	48.386	77		TF	Cluster5
Potra2n6c13008	Potra2n6c13008 (ASP5b)		AT4G31990	2h	76	0.000815586	0.000520206	76.1636	76		DEG in this study and Nitrogen metabolism gene	Cluster6
Potra2n7c15499	Potra2n7c15499		AT5G09315	2h	76	0.00175421	0.00089715	70.8113	76		DEG in this study	Cluster6
Potra2n7c16489	Potra2n7c16489 (AP3)	MIKC_MADS	AT3G54340	8h	76	0.00170181	0.00158207	54.0426	76		TF and DEG in this study	Cluster5
Potra2n3c6990	Potra2n3c6990 (NAC083)	NAC	AT5G13180		76	0.00600807	0.0010415	44.5667	76		TF	Cluster5
Potra2n1c3167	Potra2n1c3167		AT1G30320	2h	75	0.000628628	0.00114822	63.0182	75		DEG in this study	Cluster6
Potra2n16c30330	Potra2n16c30330 (FAD8)		AT5G05580	4h	75	0.00394784	0.0011545	53.5091	75		DEG in this study	Cluster6
Potra2n2c4882	Potra2n2c4882 (WRKY41)	WRKY	AT4G11070	4h	75	0.00226055	0.000908705	39.5319	75		TF and DEG in this study	Cluster6
Potra2n5c10936	Potra2n5c10936		AT1G03070	4h	75	0.00172664	0.000725225	50.9483	75		DEG in this study	Cluster5
Potra2n4c10441	Potra2n4c10441	NAC	AT2G02450		75	0.00359509	0.00101684	26.5385	75		TF	Cluster8
Potra2n14c27409	Potra2n14c27409 (AUD1)		AT3G62830	2h	74	0.000164314	0.00130129	71.7679	74		DEG in this study	Cluster6
Potra2n15c28766	Potra2n15c28766		AT2G03800	4h	74	0.00229896	0.000931331	62.2182	74		DEG in this study	Cluster6
Potra2n3c7551	Potra2n3c7551		AT4G25170	4h	74	0.00374704	0.000673932	50.9259	74		DEG in this study	Cluster5
Potra2n11c22450	Potra2n11c22450 (MEE23)		AT2G34790	8h	74	0.000808368	0.00135125	55.8727	74		DEG in this study	Cluster5
Potra2n9c18729	Potra2n9c18729 (EIN3)	EIL	AT3G20770		74	0.0012373	0.000654237	72.7273	74		TF	Cluster6
Potra2n14c26863	Potra2n14c26863 (LBD19)#	LBD	AT2G45410	8h	73	0.00135069	0.00113419	53.7083	73	0.0105516	TF and DEG in this study	Cluster5
Potra2n7c16179	Potra2n7c16179		AT5G67370	4h	73	0.000421596	0.00132728	57.2857	73		DEG in this study	Cluster5
Potra2n15c28072	Potra2n15c28072 (bHLH)	bHLH	AT5G51790		73	0.00422587	0.0010704	48.4906	73		TF	Cluster6
Potra2n7c16410	Potra2n7c16410 (RL1)	MYB_related	AT4G39250		73	0.00384276	0.00101587	45.3333	73		TF	Cluster6
Potra2n9c20054	Potra2n9c20054	MYB_related	AT5G57620		73	0.0061016	0.00162716	28.5	73		TF	Cluster8
Potra2n1c1476	Potra2n1c1476 (LOX3)		AT1G17420	4h	72	0.00437445	0.000962658	45.1731	72		DEG in this study	Cluster6
Potra2n9c19054	Potra2n9c19054 (PAP10)		AT2G16430	4h	72	0.00253315	0.0007613	43.2391	72		DEG in this study	Cluster6
Potra2n14c26559	Potra2n14c26559 (B3)	B3	AT5G44250		72	0.00351694	0.000817559	72.902	72		TF	Cluster6
Potra2n4c8685	Potra2n4c8685	MYB	AT4G21440		72	0.00854281	0.00125334	26.5745	72		TF	Cluster8
Potra2n10c21610	Potra2n10c21610 (UMAMIT36)		AT1G70260	2h	71	0.00969187	0.000788702	48.8667	71		DEG in this study	Cluster6
Potra2n426s35633	Potra2n426s35633 (CBSX5)		AT4G27460	2h	71	0.00252899	0.00108464	59.2963	71		DEG in this study	Cluster6
Potra2n8c18105	Potra2n8c18105 (CIPK4)		AT4G14580	2h	71	0.00266878	0.000451798	74.1961	71		DEG in this study	Cluster6
Potra2n2c5098	Potra2n2c5098		AT1G02020	2h	71	0.00193956	0.000680826	75.8333	71		DEG in this study	Cluster6
Potra2n1c1268	Potra2n1c1268		AT2G38740	4h	71	0.00558203	0.000625627	36.7115	71		DEG in this study	Cluster6
Potra2n18c31948	Potra2n18c31948		AT4G28400	4h	71	0.00438591	0.000795477	36.2708	71		DEG in this study	Cluster6
Potra2n11c22968	Potra2n11c22968 (WRKY20)	WRKY	AT4G26640		71	0.00178033	0.000339635	76.6981	71		TF	Cluster4
Potra2n18c32065	Potra2n18c32065 (bHLH)	bHLH	AT5G57150		71	0.00348884	0.000571177	41.7963	71		TF	Cluster6
Potra2n6c12867	Potra2n6c12867	NAC	AT2G24430		71	0.00461388	0.000990621	28.6939	71		TF	Cluster8
Potra2n8c18414	Potra2n8c18414 (EMB3108)		AT1G59990	4h	70	0.00166283	0.000467601	40.0392	70		DEG in this study	Cluster6
Potra2n5c12551	Potra2n5c12551		AT1G08990	4h	70	0.000194733	0.00199203	52.2542	70		DEG in this study	Cluster5
Potra2n10c20181	Potra2n10c20181 (EIN3)	EIL	AT3G20770		70	0.00824687	0.000886797	37.2917	70		TF	Cluster6
Potra2n4c8818	Potra2n4c8818 (AP2/ERF)	ERF	AT1G28370		70	0.00160333	0.00056283	73.25	70		TF	Cluster6
Potra2n4c9705	Potra2n4c9705 (REM1)	B3	AT3G19184		70	0.00310718	0.000472997	72.1224	70		TF	Cluster4
Potra2n5c11113	Potra2n5c11113 (AP2/ERF)	ERF	AT5G50080		70	0.00241378	0.000447041	51.4528	70		TF	Cluster6
Potra2n7c15466	Potra2n7c15466 (SOM)	C3H	AT1G03790		70	0.00169199	0.000345736	70.434	70		TF	Cluster4
Potra2n8c17350	Potra2n8c17350	MYB	AT3G12720		70	0.00675454	0.00103251	26.1087	70		TF	Cluster8
Potra2n1c322	Potra2n1c322		AT1G16170	2h	69	1.62008e-05	0.000895515	83.9167	69		DEG in this study	Cluster6
Potra2n154s34742	Potra2n154s34742 (PAF1)		AT5G12950	4h	69	0.000514006	0.00134095	54.7843	69		DEG in this study	Cluster5
Potra2n15c28548	Potra2n15c28548 (PAO1)		AT5G13700	4h	69	0.00346921	0.000879664	41.3333	69		DEG in this study	Cluster6
Potra2n19c33300	Potra2n19c33300 (WNK4)		AT5G58350	4h	69	0.00164282	0.00163099	43.766	69		DEG in this study	Cluster5
Potra2n3c6614	Potra2n3c6614 (PAF1)		AT5G12950	8h	69	0.000469693	0.00189247	52.9259	69		DEG in this study	Cluster5
Potra2n16c30161	Potra2n16c30161 (ZAT14)	C2H2	AT5G03510		69	0.00171579	0.00122753	51.86	69		TF	Cluster5
Potra2n246s35110	Potra2n246s35110 (MES1)		AT2G23620	4h	68	0.00672863	0.00113811	42.82	68		DEG in this study	Cluster5
Potra2n266s35156	Potra2n266s35156 (CLA1)		AT4G15560	4h	68	0.00333847	0.000889988	44.32	68		DEG in this study	Cluster6
Potra2n8c17135	Potra2n8c17135 (GPAT5)		AT3G11430	4h	68	0.00119541	0.000779811	56.3846	68		DEG in this study	Cluster5
Potra2n14c26907	Potra2n14c26907	HD-ZIP	AT4G00730		68	0.00751278	0.00138888	27.5909	68		TF	Cluster8
Potra2n6c14364	Potra2n6c14364 (WRKY70)#	WRKY	AT3G56400	4h	67	0.00826193	0.00062306	37.3478	67	0.00144931	TF and DEG in this study	Cluster6
Potra2n6c13596	Potra2n6c13596		AT5G06570	8h	67	0.00650931	0.00105796	25.3902	67		DEG in this study	Cluster5
Potra2n10c22291	Potra2n10c22291 (EBP)	ERF	AT3G16770		67	0.00125996	0.000522866	73.6957	67		TF	Cluster4
Potra2n1c476	Potra2n1c476 (CAMTA)	CAMTA	AT1G67310		67	0.00323076	0.00102711	45.5102	67		TF and Nitrate responsive TF [2, 3]	Cluster6
Potra2n2c5022	Potra2n2c5022 (SK32)		AT4G00720	4h	66	0.0013863	0.000529262	71.4231	66		DEG in this study	Cluster4
Potra2n7c16578	Potra2n7c16578	MYB	AT3G49690		66	0.00473144	0.000832992	26.9778	66		TF	Cluster8
Potra2n18c32068	Potra2n18c32068 (bHLH35)	bHLH	AT5G57150	4h	65	0.00230636	0.000808961	41.814	65		TF and DEG in this study	Cluster6
Potra2n9c19332	Potra2n9c19332 (ZF2)	C2H2	AT3G19580	4h	65	0.00148697	0.000393022	51.4444	65		TF and DEG in this study	Cluster5
Potra2n228s35025	Potra2n228s35025	NAC	AT2G24430		65	0.00355725	0.00091231	26.1739	65		TF	Cluster8
Potra2n4c8518	Potra2n4c8518 (ATAPR1)		AT4G04610	2h	64	0.00200648	0.000633921	64.4	64		DEG in this study	Cluster6
Potra2n4c10024	Potra2n4c10024		AT4G38470	2h	64	0.0104543	0.000632587	57.5238	64		DEG in this study	Cluster6
Potra2n4c8686	Potra2n4c8686		AT4G05090	2h	64	0.000875447	0.000385865	72.4583	64		DEG in this study	Cluster6
Potra2n10c20512	Potra2n10c20512 (ABCG6)		AT5G13580	4h	64	0.000527025	0.0012372	53.3095	64		DEG in this study	Cluster5
Potra2n3c7136	Potra2n3c7136 (ERF-1)	ERF	AT4G17500	4h	64	0.00312693	0.000808058	43.7381	64		TF and DEG in this study	Cluster6
Potra2n6c15012	Potra2n6c15012		AT3G57220	4h	64	0.00195993	0.000700236	79.3636	64		DEG in this study	Cluster4
Potra2n3c6835	Potra2n3c6835 (WRKY40)	WRKY	AT1G80840		64	0.00144078	0.000582934	57.8444	64		TF	Cluster6
Potra2n1c366	Potra2n1c366 (WRKY40)*#	WRKY	AT1G80840	2h	63	0.000568992	0.000388585	74.8367	63	1.37089e-05	TF and DEG in this study	Cluster6
Potra2n6c14360	Potra2n6c14360 (STN8)		AT5G01920	4h	63	0.00478691	0.000670698	27.5745	63		DEG in this study	Cluster9
Potra2n1c3594	Potra2n1c3594		AT4G21380	4h	63	0.00934079	0.000787616	33.9024	63		DEG in this study	Cluster6
Potra2n5c12509	Potra2n5c12509			4h	63	0.000176386	0.000469096	56.3654	63		DEG in this study	Cluster5
Potra2n5c11746	Potra2n5c11746		AT1G43910	4h	62	0.00902225	0.000997999	36.1282	62		DEG in this study	Cluster6
Potra2n3c6940	Potra2n3c6940		AT5G51920	8h	62	0.00316338	0.00143918	28.5111	62		DEG in this study	Cluster5
Potra2n818s36797	Potra2n818s36797 (WRKY2)*	WRKY	AT5G56270		62	0.000887584	0.000138656	74.3448	62		TF	Cluster4
Potra2n6c13323	Potra2n6c13323 (ROXY21)		AT4G33040	8h	60	0.00693205	0.00142147	20.5135	60		DEG in this study	Cluster5
Potra2n13c25814	Potra2n13c25814 (ANAC087)*	NAC	AT5G18270		60	0.000504191	0.00122803	54.3556	60		TF	Cluster5
Potra2n19c33920	Potra2n19c33920 (CRT3)		AT1G08450	4h	59	0.00347199	0.000916609	32.3333	59		DEG in this study	Cluster6
Potra2n5c10926	Potra2n5c10926 (C2H2)	C2H2	AT4G02670		59	0.0028293	0.000709758	62.7073	59		TF	Cluster6
Potra2n8c17839	Potra2n8c17839 (GAI)	GRAS	AT1G14920		59	0.00218852	0.000258819	45.9592	59		TF	Cluster6
Potra2n16c29670	Potra2n16c29670 (MYB-HB-like)*	MYB-HB-like	AT5G06800	4h	58	0.000853448	0.00072618	58.4211	58		TF and DEG in this study	Cluster5
Potra2n2c5671	Potra2n2c5671		AT1G44350	4h	58	0.00204635	0.00100697	50.9545	58		DEG in this study	Cluster6
Potra2n9c18685	Potra2n9c18685 (TGA9)	bZIP	AT1G08320		58	0.00424996	0.000327354	40.1556	58		TF	Cluster5
Potra2n1c1486	Potra2n1c1486 (GRAS)	GRAS	AT3G13840	2h	57	0.00179454	0.000568734	67.3023	57		TF and DEG in this study	Cluster6
Potra2n203s34950	Potra2n203s34950 (NRG1.1)		AT5G66900	4h	57	0.00262069	0.000949676	33.6512	57		DEG in this study	Cluster6
Potra2n12c24399	Potra2n12c24399			4h	57	0.00115268	0.000290755	74.8605	57		DEG in this study	Cluster4
Potra2n6c12957	Potra2n6c12957		AT4G31860	2h	56	0.00463502	0.000711256	56.275	56		DEG in this study	Cluster3
Potra2n5c12529	Potra2n5c12529 (ATHMP25)		AT3G06130	4h	56	0.0043433	0.00071134	45.7209	56		DEG in this study	Cluster5
Potra2n13c25173	Potra2n13c25173 (bHLH)	bHLH	AT4G20970		56	0.00130032	0.0011767	43.3171	56		TF	Cluster6
Potra2n15c28915	Potra2n15c28915 (MYB52)	MYB	AT1G17950		56	0.00494253	0.000853566	40.4	56		TF	Cluster6
Potra2n5c11972	Potra2n5c11972 (bHLH)	bHLH	AT4G37850		56	0.00674703	0.000978423	39.2222	56		TF	Cluster6
Potra2n8c17660	Potra2n8c17660 (CIL1)	bHLH	AT1G68920		56	0.00199574	0.000331339	74.8261	56		TF	Cluster4
Potra2n14c27135	Potra2n14c27135 (MEE47)		AT4G00950	2h	55	0.00151234	0.00114429	47.3333	55		DEG in this study	Cluster6
Potra2n14c26530	Potra2n14c26530 (bHLH)	bHLH	AT5G42930		55	0.00929841	0.000903281	32.1667	55		TF	Cluster6
Potra2n2c5554	Potra2n2c5554 (RAP2.4)	ERF	AT1G78080		55	0.00446624	0.000853154	41.973	55		TF and Nitrate responsive TF [2, 3]	Cluster6
Potra2n4c8720	Potra2n4c8720 (BRD4)	MYB_related	AT1G61215		55	0.00443288	0.000551838	69.8158	55		TF	Cluster6
Potra2n5c12247	Potra2n5c12247 (ATAF1)	NAC	AT1G01720		55	0.00423019	0.000491199	41.9737	55		TF	Cluster6
Potra2n10c20786	Potra2n10c20786	G2-like	AT2G40260		55	0.00400742	0.00146722	26.9512	55		TF	Cluster8
Potra2n6c14534	Potra2n6c14534			4h	54	0.00583698	0.000667234	33.3125	54		DEG in this study	Cluster6
Potra2n11c22391	Potra2n11c22391 (AAP7.1b)		AT5G23810	8h	54	0.00105311	0.000969882	46.3421	54		DEG in this study and Nitrogen metabolism gene	Cluster5
Potra2n9c18811	Potra2n9c18811 (HDA3)	C2H2	AT3G44750		54	0.00114114	0.000962172	57.9394	54		TF and Nitrate responsive TF [2, 3]	Cluster6
Potra2n17c30744	Potra2n17c30744	G2-like	AT5G16560		54	0.00670453	0.00100095	23.6875	54		TF	Cluster8
Potra2n14c27101	Potra2n14c27101 (WRKY53)	WRKY	AT4G23810	4h	53	0.00201143	0.000877896	32.9268	53		TF and DEG in this study	Cluster6
Potra2n3c8258	Potra2n3c8258 (SGS3)		AT5G23570	4h	53	0.00206676	0.000322093	72.3095	53		DEG in this study	Cluster4
Potra2n10c20480	Potra2n10c20480 (NF-YB)*	NF-YB	AT3G54970		53	0.000841659	0.000289583	74.3947	53		TF	Cluster4
Potra2n6c13502	Potra2n6c13502 (ABS2)*	B3	AT2G36080	2h	52	7.24291e-05	0.00116617	79.0244	52		TF, DEG in this study and Nitrate responsive TF [2, 3]	Cluster6
Potra2n3c7330	Potra2n3c7330		AT5G52430	4h	52	0.00155178	0.00053729	45.4865	52		DEG in this study	Cluster5
Potra2n13c25129	Potra2n13c25129		AT1G03670	4h	52	0.00339668	0.00122684	35.425	52		DEG in this study	Cluster6
Potra2n19c34121	Potra2n19c34121		AT2G33260	4h	52	0.00170163	0.000259121	81.9211	52		DEG in this study	Cluster4
Potra2n17c31554	Potra2n17c31554	M-type_MADS	AT5G60440		52	0.00302138	0.0012921	28.186	52		TF	Cluster8
Potra2n1c2317	Potra2n1c2317 (ELI3-1)		AT4G37980	4h	51	0.00290451	0.000674082	33.7179	51		DEG in this study	Cluster6
Potra2n8c17703	Potra2n8c17703 (AOC3)		AT3G25780	4h	51	0.00195582	0.000460865	40.1026	51		DEG in this study	Cluster6
Potra2n9c18949	Potra2n9c18949 (AAP2.2)		AT5G09220	4h	51	0.0090181	0.00109426	22.2353	51		DEG in this study and Nitrogen metabolism gene	Cluster3
Potra2n1c1212	Potra2n1c1212			8h	51	0.0112764	0.000846525	28.2424	51		DEG in this study	Cluster5
Potra2n10c21293	Potra2n10c21293 (HHO2)#	MYB-HB-like	AT1G68670	2h	50	0.00300855	0.000395012	56.7838	50	1.37089e-05	TF and DEG in this study	Cluster6
Potra2n12c24465	Potra2n12c24465 (CYP71A22)		AT3G48310	2h	50	0.000753429	0.000448406	72.9706	50		DEG in this study	Cluster6
Potra2n19c33458	Potra2n19c33458 (bHLH)	bHLH	AT4G20970	4h	50	0.00286481	0.000567804	35.2432	50		TF and DEG in this study	Cluster6
Potra2n2c4816	Potra2n2c4816		AT2G46630	8h	50	0.0078249	0.00149892	18.0789	50		DEG in this study	Cluster8
Potra2n10c21177	Potra2n10c21177 (MYB111)	MYB	AT5G49330		50	0.00246214	0.00033335	69.9459	50		TF	Cluster4
Potra2n1c2036	Potra2n1c2036 (MYB48)	MYB	AT3G46130		50	0.0054128	0.000804316	30.875	50		TF	Cluster5
Potra2n1c3373	Potra2n1c3373 (BEH4)	BES1	AT1G78700		50	0.00402143	0.000475447	61.6316	50		TF	Cluster6
Potra2n2c5381	Potra2n2c5381	MYB	AT3G49690		50	0.00203143	0.00117841	27.2857	50		TF	Cluster8
Potra2n3c7503	Potra2n3c7503 (NRT1.1/NPF6.3)		AT1G12110	2h	49	0.00740405	0.000681965	48.303	49		DEG in this study and Nitrogen metabolism gene	Cluster3
Potra2n6c14860	Potra2n6c14860 (RITF1)*	PLATZ	AT2G12646	2h	49	0.000355423	0.000419597	83.3429	49		TF and DEG in this study	Cluster6
Potra2n2c5831	Potra2n2c5831 (ERF110)	ERF	AT5G50080	4h	49	0.00625046	0.00054572	40.1515	49		TF and DEG in this study	Cluster5
Potra2n747s36676	Potra2n747s36676 (EFE)		AT1G05010	4h	49	0.00313317	0.00045506	53.5882	49		DEG in this study	Cluster6
Potra2n9c19482	Potra2n9c19482 (CYP87A2)		AT1G12740	4h	49	0.00295531	0.00126872	36.95	49		DEG in this study	Cluster6
Potra2n1c1624	Potra2n1c1624	CPP	AT2G20110		49	0.00211094	0.000812969	28.8182	49		TF	Cluster8
Potra2n5c11381	Potra2n5c11381	MYB	AT1G34670		49	0.00799973	0.000586891	27.5526	49		TF	Cluster8
Potra2n8c18075	Potra2n8c18075 (FL2)		AT3G22810	8h	48	0.00126157	0.000827745	32.6944	48		DEG in this study	Cluster5
Potra2n12c24342	Potra2n12c24342 (MYB)	MYB_related	AT1G19000		48	0.00693741	0.000683781	40.25	48		TF	Cluster6
Potra2n15c28644	Potra2n15c28644 (HB6)*	HD-ZIP	AT2G22430		48	0.000887238	0.00106847	37.0286	48		TF	Cluster5
Potra2n7c16258	Potra2n7c16258 (HEC2)	bHLH	AT3G50330		48	0.00571819	0.000462903	70.7222	48		TF	Cluster4
Potra2n4c8731	Potra2n4c8731 (NAC025)	NAC	AT1G61110	4h	47	0.0022047	0.000447649	76.5625	47		TF and DEG in this study	Cluster4
Potra2n7c16259	Potra2n7c16259		AT5G42930	4h	47	0.00184994	0.000735999	45.9667	47		DEG in this study	Cluster6
Potra2n17c31507	Potra2n17c31507		AT5G64230	4h	47	0.00353115	0.00114357	19.5	47		DEG in this study	Cluster3
Potra2n14c27144	Potra2n14c27144 (DAG1)*	Dof	AT3G61850		47	0.000524261	0.000544781	52.4286	47		TF and Nitrate responsive TF [2, 3]	Cluster6
Potra2n1c869	Potra2n1c869 (bHLH)	bHLH	AT5G41315		47	0.00471457	0.000648536	35.3333	47		TF	Cluster6
Potra2n6c14085	Potra2n6c14085 (ERF017)	ERF	AT1G19210		47	0.00129477	0.000261274	74.0976	47		TF	Cluster6
Potra2n6c14477	Potra2n6c14477 (AUX1)		AT2G38120	2h	46	0.00762376	0.000530395	29.2812	46		DEG in this study	Cluster5
Potra2n1c1022	Potra2n1c1022 (LTPG32)		AT1G70250	4h	46	0.00367891	0.000408798	38.7879	46		DEG in this study	Cluster6
Potra2n4c10459	Potra2n4c10459 (PUB35)		AT4G25160	4h	46	0.00434864	0.000818347	35.1765	46		DEG in this study	Cluster6
Potra2n14c27366	Potra2n14c27366 (COBL7)		AT4G16120	8h	46	0.000394303	0.00112016	45.6111	46		DEG in this study	Cluster5
Potra2n10c21350	Potra2n10c21350 (MYB62)	MYB	AT1G68320		46	0.00423559	0.000523847	36.1875	46		TF	Cluster6
Potra2n13c25445	Potra2n13c25445 (AP2/ERF)	ERF	AT1G71520		46	0.00267163	0.000585395	70.5938	46		TF	Cluster6
Potra2n1c2847	Potra2n1c2847 (TCP20)	TCP	AT3G27010		46	0.00347106	0.00079231	40.4375	46		TF and Nitrate responsive TF [2, 3]	Cluster5
Potra2n2c6095	Potra2n2c6095 (MYB14)*	MYB_related	AT2G31180		46	0.000517256	0.000453841	44.3824	46		TF	Cluster6
Potra2n2c4849	Potra2n2c4849	bHLH	AT1G01260		46	0.00627381	0.000417887	38.1389	46		TF	Cluster6
Potra2n12c24184	Potra2n12c24184	NAC	AT3G18400		46	0.00125973	0.00122753	29.5676	46		TF	Cluster8
Potra2n2c6001	Potra2n2c6001 (FKD1)		AT3G63300	2h	45	0.000283866	0.000577685	63.4483	45		DEG in this study	Cluster6
Potra2n15c28419	Potra2n15c28419 (SOBIR1)		AT2G31880	4h	45	0.003551	0.000895951	34.8824	45		DEG in this study	Cluster6
Potra2n14c26711	Potra2n14c26711 (WRKY12)*	WRKY	AT2G44745		45	0.000670643	0.000806186	49.0909	45		TF	Cluster5
Potra2n14c27132	Potra2n14c27132 (AP2/ERF)	ERF	AT1G01250		45	0.00417731	0.000703635	38.871	45		TF	Cluster6
Potra2n18c32413	Potra2n18c32413 (COL5)	CO-like	AT5G57660		45	0.00742553	0.0011759	35.6562	45		TF	Cluster3
Potra2n7c15852	Potra2n7c15852 (HB6)	HD-ZIP	AT2G22430		45	0.0015308	0.00069584	33.9706	45		TF and Nitrate responsive TF [2, 3]	Cluster5
Potra2n6c15210	Potra2n6c15210	FAR1	AT4G15090		45	0.00201004	0.000622996	26.7241	45		TF	Cluster8
Potra2n15c28934	Potra2n15c28934	G2-like	AT5G16560		45	0.00129087	0.000711594	31.4848	45		TF	Cluster8
Potra2n2c5025	Potra2n2c5025	HD-ZIP	AT4G00730		45	0.00149419	0.000843044	28.2727	45		TF	Cluster8
Potra2n9c19893	Potra2n9c19893	MYB	AT3G46130		45	0.00310866	0.000961163	17.0714	45		TF and Nitrate responsive TF [2, 3]	Cluster3
Potra2n4c9589	Potra2n4c9589 (PLAT1)		AT4G39730	4h	44	0.00102257	0.000596299	52.4286	44		DEG in this study	Cluster6
Potra2n9c19089	Potra2n9c19089 (RD2)		AT2G21620	4h	44	0.000895431	0.000653588	37.4516	44		DEG in this study	Cluster6
Potra2n18c33172	Potra2n18c33172		AT2G24610	4h	44	0.00557342	0.00113961	19.8438	44		DEG in this study	Cluster3
Potra2n10c20424	Potra2n10c20424 (ARF16)	ARF	AT4G30080		44	0.00258274	0.000839086	34.2414	44		TF	Cluster5
Potra2n10c20676	Potra2n10c20676 (RPL)	TALE	AT5G02030		44	0.00138063	0.000399105	63.9688	44		TF	Cluster4
Potra2n14c27129	Potra2n14c27129 (JAM2)	bHLH	AT1G01260		44	0.00207778	0.000399873	66.1786	44		TF	Cluster6
Potra2n16c29769	Potra2n16c29769 (HAT14)*	HD-ZIP	AT5G06710		44	0.000408663	0.000651356	53.0714	44		TF	Cluster5
Potra2n17c31814	Potra2n17c31814 (ERF4)	ERF	AT3G15210		44	0.00308545	0.000348295	71.6562	44		TF	Cluster4
Potra2n1c1901	Potra2n1c1901 (DIV2)	MYB	AT5G04760		44	0.0047448	0.000439307	45.4194	44		TF	Cluster6
Potra2n6c15244	Potra2n6c15244 (SCL13)	GRAS	AT4G17230		44	0.00413751	0.00110082	34	44		TF	Cluster5
Potra2n14c26785	Potra2n14c26785	GATA	AT3G60530		44	0.00147395	0.000550633	29.2414	44		TF and Nitrate responsive TF [2, 3]	Cluster8
Potra2n1c3844	Potra2n1c3844 (PILS3)		AT1G76520	2h	43	0.000820577	0.000622084	74.4516	43		DEG in this study	Cluster6
Potra2n1c831	Potra2n1c831 (PGF12)		AT4G23500	2h	43	0.00858532	0.000715838	35.1071	43		DEG in this study	Cluster5
Potra2n5c11517	Potra2n5c11517 (XF1)		AT1G58440	2h	43	0.000358806	0.00016632	77.7568	43		DEG in this study	Cluster6
Potra2n8c17239	Potra2n8c17239 (CZF1)	C3H	AT2G40140		43	0.00210923	0.000314462	31.5882	43		TF and Nitrate responsive TF [2, 3]	Cluster6
Potra2n11c23403	Potra2n11c23403	MYB	AT4G21440		43	0.000816494	0.000938286	32.2667	43		TF	Cluster8
Potra2n14c26806	Potra2n14c26806 (SPX3)		AT2G45130	4h	42	0.000747931	0.00099525	23.8	42		DEG in this study	Cluster9
Potra2n2c5519	Potra2n2c5519 (UGT85A2)		AT1G22360	4h	42	0.00027436	0.00032377	55.3333	42		DEG in this study	Cluster5
Potra2n13c25884	Potra2n13c25884		AT3G04530	4h	42	0.00229968	0.000786983	29.4194	42		DEG in this study	Cluster9
Potra2n3c7504	Potra2n3c7504		AT1G62510	4h	42	0.00425118	0.000546303	63.7692	42		DEG in this study	Cluster6
Potra2n6c14603	Potra2n6c14603 (SMR3)		AT5G02420	8h	42	0.0044217	0.000684479	34.0333	42		DEG in this study	Cluster5
Potra2n13c25524	Potra2n13c25524 (WRKY70)	WRKY	AT3G56400		42	0.00153169	0.000675212	36.1613	42		TF and Nitrate responsive TF [2, 3]	Cluster6
Potra2n7c16617	Potra2n7c16617 (GAMMAMYB2)	G2-like	AT3G13040		42	0.00294035	0.000488347	42.6207	42		TF and Nitrate responsive TF [2, 3]	Cluster6
Potra2n4c9699	Potra2n4c9699	ERF	AT4G34410		42	0.00564294	0.000495921	39.6923	42		TF	Cluster6
Potra2n6c14231	Potra2n6c14231	MYB	AT5G57620		42	0.00687883	0.000504037	27.5667	42		TF	Cluster8
Potra2n10c20373	Potra2n10c20373 (ACR10)		AT2G36840	2h	41	0.00200086	0.000482107	62.3871	41		DEG in this study	Cluster6
Potra2n2c5950	Potra2n2c5950		AT4G02830	4h	41	6.46844e-05	0.000459938	62.037	41		DEG in this study	Cluster5
Potra2n3c6613	Potra2n3c6613 (PAF1)		AT5G12950	8h	41	0.000757051	0.00131776	50.5161	41		DEG in this study	Cluster5
Potra2n14c27167	Potra2n14c27167 (MYC2)	bHLH	AT1G32640		41	0.000477465	0.000441394	54.8519	41		TF	Cluster6
Potra2n2c5587	Potra2n2c5587 (TGA7)	bZIP	AT1G77920		41	0.0056927	0.000581314	33.1667	41		TF	Cluster7
Potra2n5c12223	Potra2n5c12223 (HB6)	HD-ZIP	AT2G22430		41	0.00330328	0.000523097	40.3667	41		TF and Nitrate responsive TF [2, 3]	Cluster5
Potra2n17c30908	Potra2n17c30908	C2H2	AT1G67030		41	0.00327134	0.000710573	27.5926	41		TF	Cluster8
Potra2n266s35158	Potra2n266s35158	CO-like	AT5G57660		41	0.00214906	0.00183653	19.4516	41		TF and Nitrate responsive TF [2, 3]	Cluster3
Potra2n1c2112	Potra2n1c2112	G2-like	AT3G46640		41	0.00295749	0.00130436	21.2333	41		TF and Nitrate responsive TF [2, 3]	Cluster3
Potra2n7c16024	Potra2n7c16024	NF-YC	AT1G56170		41	0.00396393	0.00104231	19.871	41		TF	Cluster3
Potra2n11c23100	Potra2n11c23100	WRKY	AT4G18170		41	0.00735202	0.000759451	11.4828	41		TF and Nitrate responsive TF [2, 3]	Cluster1
Potra2n19c34199	Potra2n19c34199 (AATP1)		AT5G40010	4h	40	0.00250006	0.000401057	28.0741	40		DEG in this study	Cluster6
Potra2n1c2934	Potra2n1c2934 (LHT1.1)		AT5G40780	4h	40	0.00406086	0.00124647	30.0882	40		DEG in this study and Nitrogen metabolism gene	Cluster3
Potra2n17c30578	Potra2n17c30578		AT1G17830	4h	40	0.00113231	0.000406634	44.7407	40		DEG in this study	Cluster6
Potra2n10c22200	Potra2n10c22200 (LBO1)		AT3G21420	8h	40	0.00171109	0.00114648	33.16	40		DEG in this study	Cluster5
Potra2n4c10281	Potra2n4c10281			8h	40	0.0015051	0.000967727	21.2222	40		DEG in this study	Cluster3
Potra2n2c6035	Potra2n2c6035 (BZO2H1)	bZIP	AT4G02640		40	0.000673123	0.000642421	45.6452	40		TF	Cluster6
Potra2n4c8837	Potra2n4c8837 (NAC073)	NAC	AT4G28500		40	0.0046418	0.000473364	49.6207	40		TF	Cluster4
Potra2n5c10987	Potra2n5c10987	bHLH	AT4G09820		40	0.00103976	0.000788743	23.9355	40		TF	Cluster8
Potra2n5c10901	Potra2n5c10901	bHLH	AT4G02590		40	0.00172546	0.00119847	29.3548	40		TF	Cluster5
Potra2n19c34112	Potra2n19c34112	G2-like	AT3G04030		40	0.00256477	0.00110634	20.2414	40		TF	Cluster8
Potra2n6c13368	Potra2n6c13368	MYB	AT2G47460		40	0.00047608	0.00157161	27.973	40		TF	Cluster8
Potra2n8c17549	Potra2n8c17549		AT3G17130	2h	39	0.0039547	0.00074977	18.8462	39		DEG in this study	Cluster3
Potra2n10c20733	Potra2n10c20733 (HSPRO2)		AT2G40000	4h	39	0.00404534	0.000437412	40.1724	39		DEG in this study	Cluster5
Potra2n4c9590	Potra2n4c9590 (PLAT2)		AT2G22170	4h	39	0.00259509	0.000552056	37.037	39		DEG in this study	Cluster6
Potra2n3c6760	Potra2n3c6760 (FT1)		AT2G03220	8h	39	0.0010724	0.000933586	47.3704	39		DEG in this study	Cluster5
Potra2n10c20555	Potra2n10c20555 (ZAT11)	C2H2	AT2G37430		39	0.000688925	0.000622333	42.0417	39		TF	Cluster5
Potra2n10c20888	Potra2n10c20888 (MYB67)	MYB	AT3G12720		39	0.00783184	0.000549616	34.7692	39		TF	Cluster6
Potra2n10c21811	Potra2n10c21811 (bHLH104)	bHLH	AT4G14410		39	0.00231018	0.000284451	63.125	39		TF and Nitrate responsive TF [2, 3]	Cluster6
Potra2n13c25005	Potra2n13c25005 (WRKY33)	WRKY	AT2G38470		39	0.00354353	0.000663103	34.4444	39		TF	Cluster6
Potra2n5c11439	Potra2n5c11439 (SACL2)	bHLH	AT5G50010		39	0.000177129	0.000329241	53.0333	39		TF	Cluster5
Potra2n1c1217	Potra2n1c1217	bHLH	AT1G32640		39	0.00165958	0.000616228	45.5161	39		TF	Cluster6
Potra2n18c32648	Potra2n18c32648	G2-like	AT2G03500		39	0.00398321	0.00107841	19.08	39		TF	Cluster8
Potra2n15c28006	Potra2n15c28006	HD-ZIP	AT4G00730		39	0.00150733	0.00119369	27.5938	39		TF	Cluster8
Potra2n13c25816	Potra2n13c25816	NAC	AT3G04070		39	0.00308029	0.00123623	24.8333	39		TF	Cluster8
Potra2n13c25861	Potra2n13c25861 (PHL1)	G2-like	AT5G29000		38	0.00204917	0.000387681	30.0741	38		TF	Cluster6
Potra2n3c7800	Potra2n3c7800 (ERF-1)	ERF	AT4G17500		38	0.000549785	0.000380811	44.3214	38		TF	Cluster6
Potra2n4c9980	Potra2n4c9980 (MYB4)	MYB	AT4G38620		38	0.00110533	0.000239162	71.8387	38		TF	Cluster6
Potra2n12c24601	Potra2n12c24601	bHLH	AT5G50915		38	0.00282278	0.000923985	24.9286	38		TF	Cluster8
Potra2n10c20949	Potra2n10c20949	Dof	AT5G39660		38	0.00176895	0.00134713	21.0323	38		TF	Cluster3
Potra2n3c7194	Potra2n3c7194	MYB	AT2G47460		38	0.00422988	0.000504432	28.4	38		TF	Cluster8
Potra2n2c6128	Potra2n2c6128	MYB_related	AT1G75250		38	0.00741266	0.000888011	17.1538	38		TF	Cluster8
Potra2n15c28784	Potra2n15c28784	NAC	AT3G18400		38	0.000840373	0.00052597	31.0357	38		TF	Cluster8
Potra2n14c27051	Potra2n14c27051	WRKY	AT2G46130		38	0.0022904	0.000957284	28.3667	38		TF	Cluster8
Potra2n1c1073	Potra2n1c1073 (G3Pp1)		AT3G47420	4h	37	0.00106114	0.000842835	28.9655	37		DEG in this study	Cluster9
Potra2n15c28935	Potra2n15c28935		AT3G17790	4h	37	0.00113918	0.000719815	24.7308	37		DEG in this study	Cluster9
Potra2n17c30644	Potra2n17c30644		AT1G01490	4h	37	0.00253147	0.000432723	35.9286	37		DEG in this study	Cluster6
Potra2n17c31404	Potra2n17c31404		AT4G25040	4h	37	0.00283334	0.000457623	35	37		DEG in this study	Cluster6
Potra2n14c27161	Potra2n14c27161		AT2G46630	4h	37	0.00907191	0.000636702	28.0417	37		DEG in this study	Cluster8
Potra2n1c889	Potra2n1c889 (HMA5)		AT1G63440	8h	37	0.00106151	0.000798143	31.24	37		DEG in this study	Cluster5
Potra2n8c17940	Potra2n8c17940 (ETL1)	bHLH	AT2G02090	8h	37	0.00179916	0.000562122	18.7308	37		TF and DEG in this study	Cluster3
Potra2n5c11148	Potra2n5c11148 (VIP1)	bZIP	AT1G43700		37	0.00198083	0.000405217	31.25	37		TF	Cluster5
Potra2n5c11519	Potra2n5c11519 (CIB4)	bHLH	AT1G10120		37	0.00157956	0.00035928	78.4783	37		TF	Cluster4
Potra2n7c16230	Potra2n7c16230 (WRKY7)	WRKY	AT4G24240		37	0.00220418	0.000263256	65.7667	37		TF	Cluster4
Potra2n7c16400	Potra2n7c16400 (GRAS)	GRAS	AT5G66770		37	0.000923314	0.000584153	28.0417	37		TF	Cluster5
Potra2n6c14318	Potra2n6c14318	GRAS	AT3G54220		37	0.00494109	0.000657634	19.85	37		TF	Cluster8
Potra2n2c4990	Potra2n2c4990	MYB_related	AT3G61250		37	0.00809797	0.000530643	17.931	37		TF	Cluster8
Potra2n3c7144	Potra2n3c7144	NAC	AT2G43000		37	0.00362841	0.000669328	21.2188	37		TF	Cluster3
Potra2n14c26737	Potra2n14c26737		AT5G47070	4h	36	0.00120154	0.000489718	51.5185	36		DEG in this study	Cluster5
Potra2n6c13170	Potra2n6c13170		AT2G25737	4h	36	0.0020072	0.000245416	31.5333	36		DEG in this study	Cluster6
Potra2n3c6889	Potra2n3c6889 (TT4)		AT5G13930	8h	36	0.000502954	0.000864761	46.68	36		DEG in this study	Cluster5
Potra2n4c10098	Potra2n4c10098 (PSK3)		AT3G44735	8h	36	0.0021502	0.000598235	27.4	36		DEG in this study	Cluster5
Potra2n12c23868	Potra2n12c23868	B3			36	0.00759386	0.00064513	9.36364	36		TF	Cluster1
Potra2n9c19233	Potra2n9c19233	bZIP	AT4G34000		36	0.00952445	0.0011637	22.5217	36		TF	Cluster6
Potra2n5c11492	Potra2n5c11492	Dof	AT5G65590		36	0.00761251	0.00079617	12.0435	36		TF	Cluster1
Potra2n17c31676	Potra2n17c31676	GRAS	AT3G49950		36	0.00123086	0.000452249	24.48	36		TF	Cluster8
Potra2n5c11227	Potra2n5c11227	MIKC_MADS	AT5G20240		36	0.00364682	0.000435534	20.6818	36		TF	Cluster8
Potra2n10c20264	Potra2n10c20264	M-type_MADS	AT3G18650		36	0.00423868	0.000433973	15.125	36		TF	Cluster8
Potra2n16c30019	Potra2n16c30019	WRKY	AT2G37260		36	0.00146692	0.000751153	25.3214	36		TF	Cluster8
Potra2n10c20785	Potra2n10c20785 (UGP3)		AT3G56040	4h	35	0.000267564	0.000624364	25.2083	35		DEG in this study	Cluster9
Potra2n7c16624	Potra2n7c16624 (CAMS1)		AT1G78955	4h	35	0.00247565	0.000191734	65.8	35		DEG in this study	Cluster4
Potra2n9c20067	Potra2n9c20067 (RZPF34)	C2H2	AT5G22920	4h	35	0.000918082	0.00033999	46.6538	35		TF and DEG in this study	Cluster6
Potra2n13c25637	Potra2n13c25637		AT3G03530	4h	35	0.00273965	0.000692531	20.8	35		DEG in this study	Cluster9
Potra2n1c721	Potra2n1c721			4h	35	0.000586766	0.000605347	39.3704	35		DEG in this study	Cluster6
Potra2n16c29544	Potra2n16c29544 (BHLH38)	bHLH	AT3G56970		35	0.000304438	0.000346657	82.875	35		TF	Cluster6
Potra2n1c512	Potra2n1c512 (BBX12)	CO-like	AT2G33500		35	0.00127634	0.000943364	23.0312	35		TF	Cluster3
Potra2n2c6156	Potra2n2c6156 (bZIP44)	bZIP	AT1G75390		35	0.00550046	0.000363805	27.0769	35		TF	Cluster5
Potra2n8c17701	Potra2n8c17701 (TEM1)	RAV	AT1G25560		35	0.00116911	0.000665344	40	35		TF and Nitrate responsive TF [2, 3]	Cluster6
Potra2n3c7688	Potra2n3c7688	bHLH	AT1G32640		35	0.00326988	0.000524019	26.8462	35		TF and Nitrate responsive TF [2, 3]	Cluster3
Potra2n2c5489	Potra2n2c5489	bHLH	AT1G72210		35	0.00138119	0.000506586	24.1034	35		TF	Cluster8
Potra2n4c8936	Potra2n4c8936	G2-like	AT2G38300		35	0.00246597	0.000736849	24.913	35		TF	Cluster8
Potra2n10c21575	Potra2n10c21575	G2-like	AT1G14600		35	0.00204039	0.00060955	28.4762	35		TF	Cluster8
Potra2n17c31213	Potra2n17c31213	HD-ZIP	AT3G01220		35	0.00310429	0.000787983	24.0455	35		TF	Cluster8
Potra2n18c33225	Potra2n18c33225	NAC	AT2G24430		35	0.00512914	0.000616786	15.8	35		TF	Cluster8
Potra2n9c19446	Potra2n9c19446	NF-YA	AT5G12840		35	0.00723055	0.000801313	30.4583	35		TF	Cluster6
Potra2n4c10286	Potra2n4c10286	TALE	AT2G27990		35	0.000296623	0.000728293	29.5	35		TF	Cluster5
Potra2n2c4716	Potra2n2c4716	WRKY	AT4G01720		35	0.00242156	0.000580027	22.6538	35		TF	Cluster8
Potra2n14c26487	Potra2n14c26487 (ASPGB1a)		AT3G16150	2h	34	0.00571545	0.000946793	17.8696	34		DEG in this study and Nitrogen metabolism gene	Cluster3
Potra2n4c8639	Potra2n4c8639		AT1G61610	2h	34	0.00200608	0.000540522	32.28	34		DEG in this study	Cluster6
Potra2n12c24253	Potra2n12c24253 (BIM1)	bHLH	AT5G08130		34	0.00184258	0.000566179	76.1304	34		TF	Cluster6
Potra2n14c26445	Potra2n14c26445 (STZ)	C2H2	AT1G27730		34	0.00153343	0.000350839	29.125	34		TF	Cluster6
Potra2n2c5386	Potra2n2c5386 (KNAT1)	TALE	AT4G08150		34	0.000438355	0.000704432	27.96	34		TF	Cluster5
Potra2n5c12122	Potra2n5c12122 (TGA1)	bZIP	AT5G65210		34	0.00153787	0.000566917	24.2609	34		TF	Cluster5
Potra2n8c17897	Potra2n8c17897 (ZFP4)	C2H2	AT1G66140		34	0.00230861	0.000307873	35.2222	34		TF	Cluster5
Potra2n14c26823	Potra2n14c26823	bHLH	AT4G00050		34	0.000341483	0.000443805	32.56	34		TF	Cluster8
Potra2n2c6286	Potra2n2c6286	bZIP	AT4G35900		34	0.000769403	0.000427869	23.7407	34		TF	Cluster3
Potra2n10c20892	Potra2n10c20892	G2-like	AT1G79430		34	0.00155353	0.000828201	20.8696	34		TF and Nitrate responsive TF [2, 3]	Cluster8
Potra2n17c31806	Potra2n17c31806	G2-like	AT5G44190		34	0.0029134	0.000685784	31.5833	34		TF	Cluster8
Potra2n3c8027	Potra2n3c8027	HD-ZIP	AT1G52150		34	0.000333552	0.00065487	26.6667	34		TF	Cluster5
Potra2n14c26586	Potra2n14c26586	MYB	AT4G37260		34	0.00210355	0.000528933	46.8333	34		TF	Cluster6
Potra2n5c12194	Potra2n5c12194	MYB	AT1G34670		34	0.000602368	0.000439718	30.5833	34		TF	Cluster8
Potra2n235s35067	Potra2n235s35067	MYB_related	AT5G04760		34	0.0082287	0.000712112	21.65	34		TF	Cluster1
Potra2n14c27196	Potra2n14c27196	MYB_related	AT1G01060		34	0.00284626	0.00272275	23.9355	34			Cluster3
Potra2n1c535	Potra2n1c535	Trihelix	AT2G33550		34	0.00477521	0.000416969	37.2381	34		TF and Nitrate responsive TF [2, 3]	Cluster5
Potra2n7c15950	Potra2n7c15950	WRKY	AT4G39410		34	0.00264242	0.000891388	19.8182	34		TF	Cluster3
Potra2n12c23799	Potra2n12c23799 (OPT9)		AT5G53510	2h	33	0.000415526	0.00206155	21.7333	33		DEG in this study	Cluster3
Potra2n8c17602	Potra2n8c17602 (BXL1)		AT5G49360	2h	33	0.00453571	0.000711033	46.4091	33		DEG in this study	Cluster3
Potra2n2c5045	Potra2n2c5045 (TCP9)	TCP	AT2G45680	4h	33	0.00145459	0.000227567	22.9259	33		TF and DEG in this study	Cluster9
Potra2n16c29601	Potra2n16c29601			4h	33	0.00204936	0.000415235	42.7917	33		DEG in this study	Cluster6
Potra2n15c29121	Potra2n15c29121			4h	33	0.00312007	0.000452833	23.4783	33		DEG in this study	Cluster9
Potra2n10c21938	Potra2n10c21938		AT1G67600	4h	33	0.000548068	0.000456082	23.625	33		DEG in this study	Cluster9
Potra2n16c30119	Potra2n16c30119 (ATHMP43)		AT5G03380	8h	33	0.00022464	0.000793785	37.3929	33		DEG in this study	Cluster5
Potra2n10c20148	Potra2n10c20148 (MSR2)	LBD	AT1G51630		33	0.0022424	0.000415342	41.2593	33		TF	Cluster5
Potra2n13c25436	Potra2n13c25436 (FUF1)	ERF	AT1G71450		33	0.00287714	0.000264794	63.1667	33		TF	Cluster4
Potra2n14c27309	Potra2n14c27309 (WRKY69)	WRKY	AT3G58710		33	0.0018146	0.000406525	35.875	33		TF	Cluster6
Potra2n17c30701	Potra2n17c30701 (SCL8)	GRAS	AT5G52510		33	0.00383312	0.000333417	63.4231	33		TF	Cluster4
Potra2n1c2330	Potra2n1c2330 (bHLH)	bHLH	AT2G42280		33	0.00294764	0.000413901	49.7619	33		TF	Cluster6
Potra2n2c5945	Potra2n2c5945	bHLH	AT4G09820		33	0.00236403	0.000633041	22.88	33		TF	Cluster8
Potra2n1c1631	Potra2n1c1631	bHLH	AT4G29100		33	0.00247834	0.00085268	19.6364	33		TF	Cluster8
Potra2n17c31186	Potra2n17c31186	Dof	AT5G39660		33	0.00204431	0.000730135	21.75	33		TF	Cluster3
Potra2n5c11764	Potra2n5c11764	GATA	AT5G66320		33	0.00480784	0.000810183	18.85	33		TF	Cluster8
Potra2n1c2483	Potra2n1c2483	MIKC_MADS	AT4G37940		33	0.00784291	0.000575304	26.1579	33		TF	Cluster1
Potra2n368s35429	Potra2n368s35429	MYB	AT3G47600		33	0.00087434	0.000537537	26.7619	33		TF	Cluster8
Potra2n7c16425	Potra2n7c16425	MYB_related	AT4G39250		33	0.00480713	0.000665701	20.0417	33		TF	Cluster8
Potra2n12c24034	Potra2n12c24034	MYB_related	AT5G17300		33	0.000673767	0.00226311	24.72	33		TF	Cluster3
Potra2n1c953	Potra2n1c953	TALE	AT1G62990		33	0.011265	0.000496266	38.2857	33		TF	Cluster4
Potra2n11c23391	Potra2n11c23391		AT1G61330	2h	32	0.00392025	0.000462062	53.7273	32		DEG in this study	Cluster4
Potra2n18c32115	Potra2n18c32115 (HKT1)		AT4G10310	4h	32	0.00324228	0.000643649	14.1905	32		DEG in this study	Cluster5
Potra2n6c15267	Potra2n6c15267		AT1G53430	4h	32	0.00246293	0.000221356	24.5385	32		DEG in this study	Cluster5
Potra2n14c26520	Potra2n14c26520		AT5G67090	4h	32	0.00343427	0.000546117	38.1304	32		DEG in this study	Cluster6
Potra2n1c3965	Potra2n1c3965			4h	32	0.000288469	0.000689722	26.1429	32		DEG in this study	Cluster9
Potra2n16c30280	Potra2n16c30280		AT5G01225	4h	32	0.00220428	0.000447438	38.76	32		DEG in this study	Cluster5
Potra2n2c5283	Potra2n2c5283 (RAP2.1)	ERF	AT1G46768		32	0.000226283	0.000439685	43.8333	32		TF	Cluster5
Potra2n5c12188	Potra2n5c12188 (SR1)	CAMTA	AT2G22300		32	0.00149151	0.000427743	40.4737	32		TF	Cluster6
Potra2n8c16954	Potra2n8c16954 (BME3)	GATA	AT3G54810		32	0.00120546	0.000284321	42.3704	32		TF	Cluster5
Potra2n7c16585	Potra2n7c16585	GRF	AT2G22840		32	0.00159997	0.000408489	36.88	32		TF	Cluster5
Potra2n14c26808	Potra2n14c26808 (SPX3)		AT2G45130	4h	31	0.000131168	0.000507582	25.3043	31		DEG in this study	Cluster9
Potra2n1c3211	Potra2n1c3211 (NF-YB2)	NF-YB	AT5G47640	4h	31	0.00186882	0.000909437	21.6818	31		TF and DEG in this study	Cluster3
Potra2n6c14752	Potra2n6c14752 (SPX2)		AT2G26660	4h	31	7.12598e-05	0.000942867	24	31		DEG in this study	Cluster9
Potra2n4c10104	Potra2n4c10104 (HDA3)	C2H2	AT3G44750		31	4.55736e-05	0.000623894	65.9048	31		TF	Cluster6
Potra2n19c33491	Potra2n19c33491	bHLH	AT1G05710		31	0.000688054	0.000620405	32.25	31		TF	Cluster8
Potra2n5c12229	Potra2n5c12229	bHLH	AT1G72210		31	0.00154459	0.000567052	25	31		TF	Cluster8
Potra2n2c5125	Potra2n2c5125	bHLH	AT4G00050		31	0.000339015	0.000367608	29.8519	31		TF	Cluster8
Potra2n13c25941	Potra2n13c25941	bZIP	AT5G28770		31	0.00119466	0.000503415	21.5926	31		TF and Nitrate responsive TF [2, 3]	Cluster3
Potra2n10c20228	Potra2n10c20228	bZIP	AT5G04840		31	0.00169993	0.00141566	19.0909	31		TF	Cluster3
Potra2n2c5913	Potra2n2c5913	G2-like	AT2G40260		31	0.000751773	0.000347629	29.9565	31		TF	Cluster8
Potra2n15c28472	Potra2n15c28472	LBD	AT5G63090		31	0.00585608	0.000845418	10.5	31		TF	Cluster1
Potra2n4c8547	Potra2n4c8547	MYB_related	AT2G46410		31	0.00276931	0.000701812	22.0476	31		TF	Cluster8
Potra2n15c28942	Potra2n15c28942	MYB_related	AT5G17300		31	0.000813144	0.0011833	23.2917	31		TF	Cluster3
Potra2n1c2826	Potra2n1c2826 (SRG3)		AT3G02040	4h	30	0.000158017	0.00091798	24.2609	30		DEG in this study	Cluster9
Potra2n681s36450	Potra2n681s36450 (SGS3)		AT5G23570	4h	30	0.00158916	0.000178733	66.12	30		DEG in this study	Cluster4
Potra2n81s34501	Potra2n81s34501			4h	30	0.000768068	0.000466695	27.5455	30		DEG in this study	Cluster8
Potra2n8c17746	Potra2n8c17746		AT1G25400	4h	30	0.00189629	0.000465939	35.2222	30		DEG in this study	Cluster6
Potra2n11c23103	Potra2n11c23103		AT1G29790	4h	30	0.00350387	0.000444598	51.7391	30		DEG in this study	Cluster6
Potra2n3c6981	Potra2n3c6981 (SAUR55)		AT5G50760	8h	30	0.00109971	0.00103878	25.2	30		DEG in this study	Cluster3
Potra2n9c19485	Potra2n9c19485		AT3G20090	8h	30	0.00529129	0.000850735	16.0455	30		DEG in this study	Cluster5
Potra2n4c9733	Potra2n4c9733		AT1G49570	8h	30	0.00627511	0.000696831	15.7	30		DEG in this study	Cluster3
Potra2n1c127	Potra2n1c127 (EIL3)	EIL	AT1G73730		30	0.00162529	0.000284173	34.8571	30		TF and Nitrate responsive TF [2, 3]	Cluster6
Potra2n13c25938	Potra2n13c25938	bHLH	AT4G02590		30	0.003069	0.00037	24.95	30		TF	Cluster5
Potra2n4c9546	Potra2n4c9546	Dof	AT5G39660		30	0.000616543	0.00149664	26.5	30		TF and Nitrate responsive TF [2, 3]	Cluster3
Potra2n5c11289	Potra2n5c11289	ERF	AT1G21910		30	0.00289348	0.000445347	21.7368	30		TF	Cluster8
Potra2n2c5533	Potra2n2c5533	MYB	AT1G34670		30	0.0013044	0.000633012	23.2727	30		TF	Cluster8
Potra2n14c26942	Potra2n14c26942	TCP	AT2G45680		30	0.00198941	0.000692461	20.1364	30		TF	Cluster3
Potra2n13c25959	Potra2n13c25959	Trihelix	AT5G28300		30	0.00124381	0.000445693	27.8182	30		TF	Cluster8
Potra2n2c5800	Potra2n2c5800	Trihelix	AT1G76880		30	0.00586205	0.000768779	16.0476	30		TF and Nitrate responsive TF [2, 3]	Cluster5
Potra2n10c20306	Potra2n10c20306	Trihelix	AT5G03680		30	0.00865978	0.000605872	9.81818	30		TF	Cluster5
Potra2n18c32139	Potra2n18c32139	YABBY	AT2G26580		30	0.00336583	0.000631336	15.0476	30		TF	Cluster1
Potra2n18c32121	Potra2n18c32121 (SPX2)		AT2G26660	4h	29	0.000414897	0.000885445	25.1818	29		DEG in this study	Cluster9
Potra2n2c5915	Potra2n2c5915 (NPR3)	ABTB	AT5G45110	4h	29	0.00208152	0.000257765	32.4737	29		TF and DEG in this study	Cluster6
Potra2n6c14482	Potra2n6c14482 (SQD2)		AT5G01220	4h	29	0.000276036	0.000759519	26.5263	29		DEG in this study and Nitrogen metabolism gene	Cluster9
Potra2n12c24315	Potra2n12c24315 (HB16)	HD-ZIP	AT4G40060	8h	29	0.000623557	0.00104936	27.6522	29		TF and DEG in this study	Cluster5
Potra2n19c33630	Potra2n19c33630 (ABCG25)		AT1G71960	8h	29	0.000720782	0.000817949	25	29		DEG in this study	Cluster5
Potra2n6c15063	Potra2n6c15063		AT3G21250	8h	29	0.00205432	0.000539082	13.1	29		DEG in this study	Cluster5
Potra2n4c9643	Potra2n4c9643		AT4G33420	8h	29	0.000806103	0.00108421	21.1818	29		DEG in this study	Cluster3
Potra2n2c5746	Potra2n2c5746 (MYB52)	MYB	AT1G17950		29	0.000238675	0.000372645	65.6667	29		TF	Cluster6
Potra2n6c15166	Potra2n6c15166 (AREB3)	bZIP	AT3G56850		29	0.000683107	0.000100345	63.3846	29		TF	Cluster4
Potra2n8c18060	Potra2n8c18060 (TSO1)	CPP	AT3G22780		29	0.00342708	0.00021081	52.2857	29		TF	Cluster4
Potra2n4c10348	Potra2n4c10348	B3			29	0.000485065	0.000346384	23.8636	29		TF	Cluster8
Potra2n15c29078	Potra2n15c29078	B3			29	0.000498269	0.000354098	24.3	29		TF	Cluster8
Potra2n5c11336	Potra2n5c11336	bZIP	AT1G77920		29	0.00285421	0.000569896	33.9048	29		TF and Nitrate responsive TF [2, 3]	Cluster5
Potra2n17c30991	Potra2n17c30991	CO-like	AT3G02380		29	0.00122607	0.000866153	22.4167	29		TF	Cluster3
Potra2n16c29873	Potra2n16c29873	Dof	AT3G52440		29	0.00706988	0.000747169	9.45	29		TF	Cluster1
Potra2n3c7834	Potra2n3c7834	ERF	AT5G13910		29	0.000403911	0.00028513	25.55	29		TF	Cluster8
Potra2n17c30631	Potra2n17c30631	GRAS	AT2G01570		29	0.000418792	0.00118824	22.125	29		TF	Cluster3
Potra2n12c24806	Potra2n12c24806	MIKC_MADS	AT2G45650		29	0.00473096	0.000569317	15.7222	29		TF	Cluster8
Potra2n13c25689	Potra2n13c25689	MYB	AT1G08810		29	0.00224357	0.000519754	24.2609	29		TF	Cluster8
Potra2n16c30021	Potra2n16c30021	MYB_related	AT3G09600		29	6.47674e-05	0.00243677	26.2609	29		TF	Cluster3
Potra2n2c6434	Potra2n2c6434	SBP	AT1G20980		29	0.000862785	0.000358754	35.45	29		TF	Cluster6
Potra2n7c15630	Potra2n7c15630 (GeBP)	GeBP	AT1G61730	2h	28	0.000136866	0.000216449	74.9	28		TF and DEG in this study	Cluster6
Potra2n14c26589	Potra2n14c26589 (MAPKKK5)		AT5G66850	4h	28	0.0041009	0.000317466	25.8571	28		DEG in this study	Cluster9
Potra2n17c31107	Potra2n17c31107 (EXO70E1)		AT3G29400	4h	28	0.0011151	0.000293281	37.6111	28		DEG in this study	Cluster6
Potra2n7c16146	Potra2n7c16146 (HK1)	RRA-type	AT2G17820	4h	28	0.000570746	0.000422206	45.8889	28		TF and DEG in this study	Cluster6
Potra2n6c14333	Potra2n6c14333		AT4G20780	4h	28	0.00102509	0.000537841	19.3182	28		DEG in this study	Cluster3
Potra2n17c31812	Potra2n17c31812		AT4G28430	4h	28	5.02259e-05	0.000359703	70.8125	28		DEG in this study	Cluster6
Potra2n2c5137	Potra2n2c5137		AT2G44670	8h	28	0.00165379	0.00109961	28.6	28		DEG in this study	Cluster5
Potra2n5c10888	Potra2n5c10888		AT1G08230	8h	28	0.0012451	0.000258333	49.3043	28		DEG in this study	Cluster5
Potra2n15c28687	Potra2n15c28687 (SPL6)	SBP	AT1G69170		28	0.00237639	0.000401509	75.3	28		TF	Cluster6
Potra2n16c29535	Potra2n16c29535 (AHBP-1B)	bZIP	AT5G06950		28	5.80894e-05	0.000549656	56.1765	28		TF	Cluster5
Potra2n18c32867	Potra2n18c32867 (HB-8)	HD-ZIP	AT4G32880		28	0.00236344	0.000884031	31.619	28		TF	Cluster3
Potra2n18c33178	Potra2n18c33178 (WRKY11)	WRKY	AT4G31550		28	0.0023748	0.000296526	20.1739	28		TF	Cluster3
Potra2n19c34126	Potra2n19c34126 (ANAC087)	NAC	AT5G18270		28	1.68647e-05	0.000611435	50.4118	28		TF	Cluster5
Potra2n1c1345	Potra2n1c1345 (ERF-1)	ERF	AT4G17500		28	0.000186037	0.000405667	48.35	28		TF	Cluster6
Potra2n14c27785	Potra2n14c27785	CO-like	AT3G07650		28	0.00331549	0.000905943	26.75	28		TF and Nitrate responsive TF [2, 3]	Cluster3
Potra2n9c19026	Potra2n9c19026	DBB	AT4G38960		28	0.00116176	0.00176001	24.8571	28		TF	Cluster3
Potra2n8c17403	Potra2n8c17403	Dof	AT5G39660		28	0.000291615	0.00193069	23.2692	28		TF	Cluster3
Potra2n19c33278	Potra2n19c33278	ERF	AT4G27950		28	0.00183338	0.000495762	32.8421	28		TF	Cluster6
Potra2n5c11291	Potra2n5c11291	ERF	AT1G77640		28	0.00442267	0.000616708	14.2222	28		TF	Cluster1
Potra2n4c8590	Potra2n4c8590	HD-ZIP	AT4G04890		28	0.000636245	0.000424201	16.3889	28		TF	Cluster1
Potra2n15c28632	Potra2n15c28632	LBD	AT3G47870		28	0.00216762	0.000654015	16.2941	28		TF	Cluster1
Potra2n11c23135	Potra2n11c23135	MIKC_MADS	AT4G18960		28	0.0072059	0.000541475	22.3529	28		TF	Cluster1
Potra2n17c31573	Potra2n17c31573	MIKC_MADS	AT4G24540		28	0.00835012	0.000870808	12	28		TF	Cluster1
Potra2n8c16798	Potra2n8c16798	M-type_MADS	AT3G18650		28	0.000340676	0.000346951	24.4286	28		TF	Cluster8
Potra2n1c3477	Potra2n1c3477	SBP	AT1G53160		28	0.00371339	0.000319223	17	28		TF	Cluster8
Potra2n14c26778	Potra2n14c26778	SBP	AT1G27370		28	0.00172556	0.00052851	25.0952	28		TF	Cluster8
Potra2n5c10747	Potra2n5c10747	SRS	AT1G19790		28	0.00670996	0.000747022	11.4706	28		TF and Nitrate responsive TF [2, 3]	Cluster1
Potra2n12c24693	Potra2n12c24693	Trihelix	AT2G35640		28	0.000749682	0.000491083	16.2353	28		TF	Cluster1
Potra2n18c32440	Potra2n18c32440 (XTR6)		AT4G25810	2h	27	0.0020845	0.000495921	21.3333	27		DEG in this study	Cluster3
Potra2n8c16727	Potra2n8c16727 (WRI1)	AP2	AT3G54320	4h	27	0.0015889	0.00024699	22.4783	27		TF and DEG in this study	Cluster3
Potra2n8c16931	Potra2n8c16931		AT2G39130	4h	27	0.00277291	0.000600911	19.9474	27		DEG in this study	Cluster3
Potra2n2c5232	Potra2n2c5232		AT2G26510	4h	27	0.0012158	0.000273462	53.25	27		DEG in this study	Cluster5
Potra2n13c26189	Potra2n13c26189		AT3G16785	4h	27	0.000241694	0.000499607	24.9524	27		DEG in this study	Cluster9
Potra2n7c16327	Potra2n7c16327		AT2G23450	4h	27	0.00206796	0.000352166	29.3158	27		DEG in this study	Cluster6
Potra2n10c21465	Potra2n10c21465		AT1G23110	4h	27	7.12739e-05	0.000695094	26.5263	27		DEG in this study	Cluster9
Potra2n13c25099	Potra2n13c25099		AT2G14830	8h	27	0.00362768	0.000600207	14.5714	27		DEG in this study	Cluster3
Potra2n17c31394	Potra2n17c31394 (NAC083)	NAC	AT5G13180		27	0.000712278	0.000480459	32.7619	27		TF	Cluster6
Potra2n18c33093	Potra2n18c33093 (WRKY40)	WRKY	AT1G80840		27	0.00203395	0.000185101	27.3182	27		TF	Cluster6
Potra2n5c10842	Potra2n5c10842 (MYB15)	MYB_related	AT3G23250		27	0.00108453	0.000172894	38.5	27		TF	Cluster6
Potra2n6c12972	Potra2n6c12972 (WRKY40)	WRKY	AT1G80840		27	0.00396738	0.000405052	21.2941	27		TF	Cluster2
Potra2n7c15915	Potra2n7c15915	ERF	AT1G78080		27	0.00599588	0.000527066	14.4375	27		TF and Nitrate responsive TF [2, 3]	Cluster3
Potra2n612s36155	Potra2n612s36155	GRAS	AT3G54220		27	0.00451267	0.00059152	10.75	27		TF	Cluster1
Potra2n8c16697	Potra2n8c16697	LBD	AT5G66870		27	0.00418056	0.000460177	8.11765	27		TF	Cluster1
Potra2n2c5571	Potra2n2c5571	MIKC_MADS	AT1G22130		27	0.00487508	0.000887197	9.4	27		TF	Cluster1
Potra2n10c20963	Potra2n10c20963	NAC	AT1G69490		27	0.00107362	0.000469295	27.8824	27		TF and Nitrate responsive TF [2, 3]	Cluster8
Potra2n5c11975	Potra2n5c11975	NF-YC	AT1G56170		27	5.20812e-05	0.00159313	24.5417	27		TF	Cluster3
Potra2n1c2557	Potra2n1c2557	Nin-like	AT2G17150		27	0.00174031	0.000397874	36.4211	27		TF and Nitrate signaling	Cluster6
Potra2n9c19060	Potra2n9c19060	TALE	AT2G16400		27	0.0028897	0.000321844	27.6087	27		TF	Cluster6
Potra2n3c7299	Potra2n3c7299	WRKY	AT4G01250		27	0.00306529	0.000557611	15.3158	27		TF	Cluster1
Potra2n17c31206	Potra2n17c31206	ZF-HD	AT3G28917		27	0.00270525	0.000508399	26.5	27		TF	Cluster5
Potra2n2c5397	Potra2n2c5397 (AAP6.1)		AT5G49630	2h	26	0.00508859	0.000528046	41.6111	26		DEG in this study and Nitrogen metabolism gene	Cluster3
Potra2n4c9349	Potra2n4c9349 (LBD41)	LBD	AT3G02550	2h	26	0.00565928	0.000677383	20.7059	26		TF and DEG in this study	Cluster5
Potra2n1c318	Potra2n1c318		AT1G16170	2h	26	3.0167e-06	0.000404868	81.7895	26		DEG in this study	Cluster6
Potra2n11c23300	Potra2n11c23300		AT1G28380	4h	26	0.00144375	0.000329899	31.6667	26		DEG in this study	Cluster6
Potra2n16c30279	Potra2n16c30279		AT5G01220	4h	26	0.00210269	0.000717909	28.6667	26		DEG in this study	Cluster9
Potra2n19c33806	Potra2n19c33806 (NPF4.4c)		AT1G33440	8h	26	0.00248943	0.000578365	23.875	26		DEG in this study and Nitrogen metabolism gene	Cluster5
Potra2n1c3716	Potra2n1c3716 (GSTU22)		AT1G78340	8h	26	0.000678985	0.000523593	22.8	26		DEG in this study	Cluster5
Potra2n6c14438	Potra2n6c14438		AT5G01320	8h	26	0.000701711	0.000661552	20.2632	26		DEG in this study	Cluster3
Potra2n15c28696	Potra2n15c28696 (TCP5)	TCP	AT5G60970		26	0.000678809	0.00032635	39.7368	26		TF	Cluster6
Potra2n6c14089	Potra2n6c14089	ARF	AT1G19220		26	0.00285425	0.000525316	21.2	26		TF	Cluster5
Potra2n3c7678	Potra2n3c7678	bHLH	AT5G46690		26	0.00410276	0.000488706	12.2	26		TF	Cluster1
Potra2n18c32797	Potra2n18c32797	GATA	AT4G26150		26	0.000527621	0.000855043	26.7619	26		TF and Nitrate responsive TF [2, 3]	Cluster8
Potra2n15c28204	Potra2n15c28204	GRAS	AT3G03450		26	0.00508265	0.000645886	15.9375	26		TF	Cluster1
Potra2n13c26105	Potra2n13c26105	NAC	AT1G71930		26	0.00475615	0.000572459	14.75	26		TF	Cluster1
Potra2n5c11892	Potra2n5c11892	NAC	AT2G17040		26	0.00839373	0.000887775	8.8125	26		TF	Cluster1
Potra2n16c29948	Potra2n16c29948	NAC	AT5G22380		26	0.00443158	0.000415969	12.2632	26		TF	Cluster1
Potra2n13c25694	Potra2n13c25694	WOX	AT3G03660		26	0.00513041	0.000553968	23.8125	26		TF	Cluster6
Potra2n4c9102	Potra2n4c9102 (HRU1)		AT3G03270	4h	25	0.00353294	0.000520605	31.7778	25		DEG in this study	Cluster5
Potra2n6c14433	Potra2n6c14433 (AMT2.1a)		AT2G38290	4h	25	0.000908314	0.000171536	37.8095	25		DEG in this study and Nitrogen metabolism gene	Cluster6
Potra2n13c26232	Potra2n13c26232			4h	25	0.00285115	0.000554727	16.1176	25		DEG in this study	Cluster5
Potra2n1c3797	Potra2n1c3797 (NST1)	NAC	AT2G46770		25	0.000125551	0.000312032	46.1875	25		TF	Cluster5
Potra2n2c4935	Potra2n2c4935 (RVE6)	MYB_related	AT5G52660		25	0.000882338	0.000611911	24.4	25		TF	Cluster3
Potra2n7c16372	Potra2n7c16372	C2H2	AT3G50700		25	0.00348786	0.000366216	25.8889	25		TF	Cluster6
Potra2n18c33256	Potra2n18c33256	C2H2	AT5G26610		25	0.00561111	0.000438078	10.1765	25		TF	Cluster10
Potra2n3c6952	Potra2n3c6952	CAMTA	AT1G67310		25	0.00027056	0.000441309	38.0588	25		TF	Cluster6
Potra2n8c17106	Potra2n8c17106	Dof	AT3G55370		25	0.00106485	0.000446256	19.6316	25		TF	Cluster8
Potra2n14c26684	Potra2n14c26684	ERF	AT2G44840		25	0.0032865	0.000389714	27.625	25		TF	Cluster6
Potra2n12c23795	Potra2n12c23795	GRAS	AT1G55580		25	0.00561919	0.000519434	12.8125	25		TF	Cluster1
Potra2n19c33794	Potra2n19c33794	GRAS			25	0.00159272	0.000421998	14.9333	25		TF	Cluster1
Potra2n1c971	Potra2n1c971	GRF	AT2G22840		25	0.00179611	0.000466022	17.6667	25		TF	Cluster1
Potra2n1c1355	Potra2n1c1355	HD-ZIP	AT4G16780		25	0.00077707	0.00039235	39.1333	25		TF	Cluster5
Potra2n13c25423	Potra2n13c25423	MIKC_MADS	AT1G71692		25	0.00194873	0.000701365	17.4667	25		TF	Cluster8
Potra2n1c1707	Potra2n1c1707	MYB	AT3G13890		25	0.00219302	0.000685996	14.2667	25		TF	Cluster8
Potra2n7c16062	Potra2n7c16062	NAC	AT2G43000		25	0.00133702	0.000514344	27.8	25		TF	Cluster8
Potra2n11c23285	Potra2n11c23285	NAC			25	0.0050295	0.000776487	6.86667	25		TF	Cluster1
Potra2n1c1876	Potra2n1c1876	TALE	AT2G35940		25	0.00173844	0.000333486	40	25		TF	Cluster6
Potra2n11c23573	Potra2n11c23573	TALE	AT1G62360		25	0.00497615	0.000448889	27.4118	25		TF	Cluster4
Potra2n11c22550	Potra2n11c22550	Trihelix	AT1G33240		25	0.00192917	0.000526464	18.8	25		TF	Cluster5
Potra2n1c3831	Potra2n1c3831	Trihelix	AT1G33240		25	0.00112638	0.000261307	23.6667	25		TF	Cluster5
Potra2n2c4923	Potra2n2c4923	WRKY	AT2G46130		25	0.00173478	0.000414458	25.4444	25		TF	Cluster8
Potra2n3c7488	Potra2n3c7488	YABBY	AT2G45190		25	0.00686557	0.000501485	16.4375	25		TF	Cluster1
Potra2n2c5108	Potra2n2c5108	YABBY	AT2G45190		25	0.000896162	0.000292991	15.7895	25		TF	Cluster1
Potra2n6c14767	Potra2n6c14767	YABBY	AT2G26580		25	0.00146507	0.000393632	14.8889	25		TF	Cluster1
Potra2n4c9619	Potra2n4c9619 (KAT1)		AT5G46240	4h	24	0.00219537	0.000368913	20.1111	24		DEG in this study	Cluster5
Potra2n6c14819	Potra2n6c14819 (MGD2)		AT5G20410	4h	24	0.00131835	0.000220786	23.087	24		DEG in this study	Cluster9
Potra2n7c15783	Potra2n7c15783		AT1G76980	4h	24	0.00165133	0.000253419	32	24		DEG in this study	Cluster5
Potra2n12c23811	Potra2n12c23811 (DAG1)	Dof	AT3G61850		24	0.00278173	0.000409929	24.8421	24		TF	Cluster7
Potra2n14c26636	Potra2n14c26636 (NAC028)	NAC	AT1G65910		24	0.000260456	0.000577298	43.8235	24		TF	Cluster5
Potra2n6c13849	Potra2n6c13849	AP2	AT5G57390		24	0.00363111	0.00048002	9.70588	24		TF	Cluster2
Potra2n3c7164	Potra2n3c7164	bHLH	AT4G00870		24	0.00418579	0.000637861	11.8	24		TF	Cluster1
Potra2n5c12811	Potra2n5c12811	bHLH	AT1G09530		24	0.00166248	0.00036784	33.7778	24		TF	Cluster7
Potra2n6c14620	Potra2n6c14620	bZIP	AT2G36270		24	0.000582439	0.00034599	16.0556	24		TF	Cluster1
Potra2n16c29497	Potra2n16c29497	bZIP	AT2G40950		24	0.000990975	0.000188789	21.4762	24		TF	Cluster3
Potra2n10c21580	Potra2n10c21580	C2H2	AT2G02070		24	0.00111771	0.000488903	24.0625	24		TF	Cluster8
Potra2n7c16311	Potra2n7c16311	Dof	AT3G50410		24	0.00460485	0.000468214	12.8333	24		TF	Cluster2
Potra2n1c1438	Potra2n1c1438	ERF	AT3G14230		24	0.00219609	0.000639385	14.2381	24		TF	Cluster3
Potra2n16c29671	Potra2n16c29671	G2-like	AT5G06800		24	0.00529551	0.00101864	8.8	24		TF	Cluster2
Potra2n4c10270	Potra2n4c10270	GATA	AT1G08010		24	0.00291865	0.000567655	16.8333	24		TF	Cluster5
Potra2n5c11974	Potra2n5c11974	GRAS	AT1G66350		24	0.000592293	0.000229849	27.75	24		TF	Cluster8
Potra2n7c16001	Potra2n7c16001	MIKC_MADS	AT5G23260		24	0.000717075	0.00044729	16	24		TF	Cluster1
Potra2n4c8429	Potra2n4c8429	M-type_MADS	AT5G60440		24	0.00450056	0.000446269	9.75	24		TF	Cluster1
Potra2n10c20950	Potra2n10c20950	MYB	AT1G26780		24	0.00486184	0.000290626	52.0625	24		TF	Cluster8
Potra2n19c34073	Potra2n19c34073	MYB	AT3G13540		24	0.00244307	0.000481496	18.6111	24		TF	Cluster1
Potra2n19c33988	Potra2n19c33988	MYB	AT1G08810		24	0.00308897	0.000539576	19.6	24		TF	Cluster8
Potra2n19c33365	Potra2n19c33365	MYB	AT5G16770		24	0.003258	0.000456396	27.3889	24		TF	Cluster6
Potra2n9c19094	Potra2n9c19094	MYB_related	AT2G21650		24	0.00182852	0.000316475	15.6875	24		TF	Cluster8
Potra2n4c9091	Potra2n4c9091	MYB_related	AT5G17300		24	0.00334715	0.000546068	22.8235	24		TF and Nitrate responsive TF [2, 3]	Cluster3
Potra2n11c23114	Potra2n11c23114	NAC	AT1G56140		24	0.00146045	0.000695868	14.3529	24		TF	Cluster1
Potra2n6c14033	Potra2n6c14033	NF-YA	AT1G72830		24	0.00471087	0.000559923	16.6875	24		TF	Cluster7
Potra2n1c4016	Potra2n1c4016	WRKY	AT5G56270		24	0.00274254	0.000379655	29.2778	24		TF and Nitrate responsive TF [2, 3]	Cluster6
Potra2n11c22562	Potra2n11c22562		AT3G25190	2h	23	0.00223699	0.000711055	12.6471	23		DEG in this study	Cluster1
Potra2n8c17773	Potra2n8c17773		AT1G15060	2h	23	1.38895e-05	0.000263825	79.0714	23		DEG in this study	Cluster6
Potra2n1c3583	Potra2n1c3583		AT4G27290	4h	23	0.00223541	0.000196324	30.4444	23		DEG in this study	Cluster6
Potra2n6c14579	Potra2n6c14579		AT5G02230	4h	23	0.0031992	0.00027975	37.0588	23		DEG in this study	Cluster3
Potra2n1c2838	Potra2n1c2838 (RWP1)		AT5G41040	8h	23	0.0150858	0.00052267	47.3125	23		DEG in this study	Cluster8
Potra2n18c32873	Potra2n18c32873		AT4G32810	8h	23	0.000325124	0.00070919	25.2222	23		DEG in this study	Cluster5
Potra2n4c9135	Potra2n4c9135		AT5G24010	8h	23	0.00160222	0.000241581	35.875	23		DEG in this study	Cluster5
Potra2n2c5371	Potra2n2c5371	AP2	AT4G37750		23	0.00209459	0.000458722	12	23		TF	Cluster2
Potra2n5c11497	Potra2n5c11497	AP2	AT4G37750		23	0.000583042	0.000505181	26.2857	23		TF	Cluster8
Potra2n7c15847	Potra2n7c15847	bHLH	AT1G72210		23	0.0019223	0.000266778	32.1875	23		TF	Cluster6
Potra2n6c14437	Potra2n6c14437	bHLH	AT5G01305		23	0.00342084	0.000347747	9.73333	23		TF	Cluster1
Potra2n1c627	Potra2n1c627	bZIP			23	0.00097854	0.000494776	28.1875	23		TF	Cluster8
Potra2n7c16505	Potra2n7c16505	DBB	AT2G21320		23	0.000915994	0.00197902	19.8889	23			Cluster3
Potra2n1c2062	Potra2n1c2062	Dof	AT2G37590		23	0.00181012	0.000470703	17.1333	23		TF and Nitrate responsive TF [2, 3]	Cluster8
Potra2n394s35532	Potra2n394s35532	Dof	AT5G60850		23	0.000271698	0.000959975	24.25	23		TF	Cluster3
Potra2n1c710	Potra2n1c710	Dof	AT4G24060		23	0.00314304	0.000381887	18.4375	23		TF	Cluster3
Potra2n9c19872	Potra2n9c19872	Dof	AT1G07640		23	0.00175853	0.000361724	18.05	23		TF	Cluster8
Potra2n19c33749	Potra2n19c33749	ERF	AT1G71520		23	0.00391692	0.00072028	8.42857	23		TF	Cluster1
Potra2n4c9160	Potra2n4c9160	G2-like	AT5G16560		23	0.00104663	0.000514009	27.375	23		TF	Cluster8
Potra2n12c24071	Potra2n12c24071	G2-like	AT5G16560		23	0.000621604	0.000570702	24.125	23		TF	Cluster8
Potra2n3c7647	Potra2n3c7647	G2-like	AT1G32240		23	0.00089357	0.000382773	18.875	23		TF	Cluster8
Potra2n16c30574	Potra2n16c30574	GRAS	AT3G54220		23	0.00093336	0.000629924	25.1765	23		TF	Cluster8
Potra2n6c14729	Potra2n6c14729	HD-ZIP	AT5G06710		23	0.00357904	0.000557962	9.14286	23		TF	Cluster1
Potra2n9c19925	Potra2n9c19925	HD-ZIP	AT5G06710		23	0.00463249	0.000717097	27.4	23		TF	Cluster4
Potra2n13c25048	Potra2n13c25048	MYB	AT4G21440		23	0.00173877	0.000411434	15.2	23		TF	Cluster1
Potra2n13c25042	Potra2n13c25042	MYB	AT1G06180		23	0.000307881	0.000567497	27.4211	23		TF	Cluster8
Potra2n1c2161	Potra2n1c2161	MYB	AT5G58900		23	0.00163795	0.000508431	27.8235	23		TF and Nitrate responsive TF [2, 3]	Cluster5
Potra2n14c27038	Potra2n14c27038	MYB_related	AT4G01280		23	0.000908785	0.000549552	19.5	23		TF	Cluster5
Potra2n12c24560	Potra2n12c24560	SBP	AT5G50570		23	0.00185069	0.000354724	34.4706	23		TF	Cluster6
Potra2n10c21240	Potra2n10c21240 (NIK2)		AT3G25560	2h	22	0.00339834	0.000460762	59.3077	22		DEG in this study	Cluster2
Potra2n3c8123	Potra2n3c8123 (PEPC1)		AT1G17710	4h	22	0.00017463	0.000482351	28.3077	22		DEG in this study	Cluster9
Potra2n13c25134	Potra2n13c25134		AT1G03670	4h	22	0.000735992	0.000413643	24.7059	22		DEG in this study	Cluster6
Potra2n12c23699	Potra2n12c23699 (HB-7)	HD-ZIP	AT2G46680		22	0.000779393	0.000245171	44.5714	22		TF	Cluster5
Potra2n17c31368	Potra2n17c31368 (WRKY75)	WRKY	AT5G13080		22	0.00072225	0.00019459	43.1176	22		TF	Cluster6
Potra2n5c11773	Potra2n5c11773 (VND1)	NAC	AT2G18060		22	0.00029426	0.000206786	65.7647	22		TF	Cluster6
Potra2n6c14701	Potra2n6c14701 (bHLH)	bHLH	AT5G57150		22	0.00176065	0.000348866	46.2667	22		TF	Cluster6
Potra2n6c14967	Potra2n6c14967 (SMOS1)	AP2	AT2G41710		22	0.000697102	0.000136861	65.3	22		TF	Cluster6
Potra2n10c20485	Potra2n10c20485	AP2	AT2G28550		22	0.00024752	0.000191255	60.1176	22		TF	Cluster6
Potra2n8c17876	Potra2n8c17876	ARR-B	AT3G16857		22	0.000606452	0.000175093	22.3889	22		TF	Cluster5
Potra2n11c23444	Potra2n11c23444	bHLH	AT1G61660		22	0.00132802	0.000792606	17.0667	22		TF	Cluster3
Potra2n4c9587	Potra2n4c9587	bHLH	AT3G28857		22	0.00551999	0.000572536	9.64286	22		TF	Cluster1
Potra2n2c4633	Potra2n2c4633	bZIP	AT3G62420		22	0.00340416	0.00050474	16.5	22		TF and Nitrate responsive TF [2, 3]	Cluster1
Potra2n10c21290	Potra2n10c21290	C2H2	AT1G13290		22	0.00410053	0.000403228	14.5333	22		TF	Cluster1
Potra2n1509s37113	Potra2n1509s37113	C2H2	AT2G37430		22	0.00336479	0.000498284	6.69231	22		TF	Cluster1
Potra2n14c26600	Potra2n14c26600	Dof	AT1G47655		22	0.00204816	0.00106868	12.25	22		TF	Cluster2
Potra2n1c1598	Potra2n1c1598	ERF	AT1G71450		22	0.00166327	0.00039641	11.7857	22		TF	Cluster1
Potra2n5c11699	Potra2n5c11699	GRAS	AT5G66770		22	0.000213223	0.00026419	30.8125	22		TF	Cluster5
Potra2n3c7649	Potra2n3c7649	HD-ZIP	AT5G46880		22	0.00329942	0.000921171	9.875	22		TF	Cluster1
Potra2n4c8998	Potra2n4c8998	MIKC_MADS	AT4G18960		22	0.00269005	0.000577311	10.4	22		TF	Cluster1
Potra2n12c24643	Potra2n12c24643	M-type_MADS	AT5G55690		22	0.00392236	0.000499693	8	22		TF	Cluster1
Potra2n8c16979	Potra2n8c16979	M-type_MADS	AT5G60440		22	0.00408643	0.000390165	30.5	22		TF	Cluster4
Potra2n17c30808	Potra2n17c30808	MYB	AT1G22640		22	0.00152929	0.000434527	25.4375	22		TF and Nitrate responsive TF [2, 3]	Cluster8
Potra2n5c11186	Potra2n5c11186	MYB	AT1G17950		22	0.00515881	0.000757955	11.2667	22		TF	Cluster7
Potra2n3c7477	Potra2n3c7477	MYB	AT4G22680		22	0.00209207	0.000424415	16.7647	22		TF	Cluster5
Potra2n6c14139	Potra2n6c14139	WRKY	AT2G37260		22	0.000325425	0.000246516	24.5294	22		TF	Cluster8
Potra2n17c30939	Potra2n17c30939		AT5G38510	2h	21	0.00435849	0.000359785	52.6667	21		DEG in this study	Cluster6
Potra2n6c14421	Potra2n6c14421 (FER1)		AT5G01600	4h	21	0.000746324	0.000140893	34.4375	21		DEG in this study	Cluster6
Potra2n8c17513	Potra2n8c17513 (ABCG37)		AT3G53480	4h	21	0.000749648	0.000205827	29.1875	21		DEG in this study	Cluster6
Potra2n8c18018	Potra2n8c18018 (XMPP)		AT2G32150	4h	21	0.00172789	0.000636336	16.875	21		DEG in this study	Cluster3
Potra2n6c14095	Potra2n6c14095		AT5G20790	4h	21	0.00152837	0.000463027	18.0714	21		DEG in this study	Cluster9
Potra2n13c25348	Potra2n13c25348 (ABCG25)		AT1G71960	8h	21	0.00175918	0.000382682	27.1538	21		DEG in this study	Cluster5
Potra2n1c1406	Potra2n1c1406 (AAH)		AT4G20070	8h	21	0.00230655	0.000352928	25.7059	21		DEG in this study	Cluster5
Potra2n10c20423	Potra2n10c20423 (BME3)	GATA	AT3G54810		21	8.43411e-05	0.000243878	52.6	21		TF	Cluster5
Potra2n18c32866	Potra2n18c32866 (HB-8)	HD-ZIP	AT4G32880		21	0.00121175	0.000659879	30.0556	21		TF	Cluster3
Potra2n2c5076	Potra2n2c5076 (LBD19)	LBD	AT2G45410		21	0.000782202	0.000164065	55	21		TF	Cluster5
Potra2n9c19749	Potra2n9c19749 (C2H2)	C2H2	AT2G29660		21	0.00152591	0.000240629	59.3333	21		TF	Cluster4
Potra2n8c18300	Potra2n8c18300	ARR-B	AT1G67710		21	0.00124941	0.000568752	15.9286	21		TF	Cluster3
Potra2n6c14875	Potra2n6c14875	bZIP	AT5G06839		21	0.00288327	0.000347398	10.4	21		TF	Cluster1
Potra2n8c16778	Potra2n8c16778	bZIP	AT5G04840		21	0.00288349	0.000458918	18	21		TF	Cluster7
Potra2n16c29709	Potra2n16c29709	C2H2	AT3G57670		21	0.00502772	0.000374916	11.4706	21		TF	Cluster7
Potra2n16c29719	Potra2n16c29719	C3H	AT2G41900		21	0.00223968	0.000213272	36.25	21		TF	Cluster4
Potra2n2c6089	Potra2n2c6089	ERF	AT3G23230		21	0.00208709	0.000257323	28.4615	21		TF	Cluster6
Potra2n3c7820	Potra2n3c7820	ERF	AT4G16750		21	0.00301246	0.000467693	15.3333	21		TF	Cluster8
Potra2n1c437	Potra2n1c437	GATA	AT3G24050		21	0.00251962	0.000259619	20.9333	21		TF	Cluster5
Potra2n14c27808	Potra2n14c27808	HB-other	AT4G12750		21	0.000209597	0.000357197	31	21		TF and Nitrate responsive TF [2, 3]	Cluster6
Potra2n1c3263	Potra2n1c3263	HD-ZIP	AT2G34710		21	0.00059292	0.00107401	14	21		TF	Cluster2
Potra2n7c16365	Potra2n7c16365	HD-ZIP	AT4G36740		21	0.00279844	0.000346466	13.8571	21		TF	Cluster1
Potra2n2c5701	Potra2n2c5701	MIKC_MADS	AT5G20240		21	0.00219016	0.000414889	12.5385	21		TF	Cluster1
Potra2n19c33364	Potra2n19c33364	MYB	AT5G16770		21	0.00138951	0.000408601	16.375	21		TF	Cluster8
Potra2n5c11940	Potra2n5c11940	NAC	AT1G56010		21	0.00342159	0.000597963	9.38462	21		TF	Cluster1
Potra2n17c30875	Potra2n17c30875	NF-YC	AT1G56170		21	0.00656776	0.000495436	9.28571	21		TF	Cluster10
Potra2n6c13714	Potra2n6c13714	RAV	AT1G51120		21	0.00424857	0.000633662	11.8333	21		TF	Cluster8
Potra2n6c13552	Potra2n6c13552	TALE	AT2G35940		21	0.00318986	0.000514795	25.3529	21		TF and Nitrate responsive TF [2, 3]	Cluster7
Potra2n2c6165	Potra2n2c6165	TALE	AT1G75410		21	0.00425328	0.000312848	25.8462	21		TF	Cluster7
Potra2n17c30952	Potra2n17c30952	TCP	AT1G67260		21	0.00182385	0.000576364	13.4	21		TF	Cluster8
Potra2n4c8960	Potra2n4c8960	WRKY	AT1G29280		21	0.00158273	0.000270503	66.7857	21		TF	Cluster4
Potra2n8c17466	Potra2n8c17466	WRKY	AT1G69310		21	0.00381165	0.000322706	41.4	21		TF	Cluster4
Potra2n11c23614	Potra2n11c23614	WRKY	AT1G62300		21	0.00283419	0.000336677	27.3333	21		TF	Cluster8
Potra2n16c29851	Potra2n16c29851	YABBY	AT1G08465		21	0.00219477	0.000458158	15	21		TF	Cluster1
Potra2n1c3617	Potra2n1c3617		AT1G11530	2h	20	0.00170018	0.000132143	58	20		DEG in this study	Cluster6
Potra2n13c25212	Potra2n13c25212 (CYP82G1)		AT3G25180	4h	20	0.00228515	0.000484169	20.5	20		DEG in this study	Cluster8
Potra2n5c11696	Potra2n5c11696 (DWF4)		AT3G50660	4h	20	0.00140651	0.000299129	30.5714	20		DEG in this study	Cluster5
Potra2n13c25215	Potra2n13c25215		AT3G54420	4h	20	0.000634186	0.000337439	48.5	20		DEG in this study	Cluster6
Potra2n7c16358	Potra2n7c16358	BES1	AT1G75080		20	0.00383459	0.000293519	36.3077	20		TF	Cluster4
Potra2n1c143	Potra2n1c143	bHLH	AT1G51140		20	0.0031841	0.000412784	16.3846	20		TF	Cluster7
Potra2n19c33527	Potra2n19c33527	bHLH			20	0.00150523	0.000460865	8.81818	20		TF	Cluster1
Potra2n2c5269	Potra2n2c5269	bZIP	AT1G45249		20	0.000327252	0.00034835	24	20		TF	Cluster3
Potra2n2c5788	Potra2n2c5788	bZIP	AT1G43700		20	0.00019398	0.000244178	26.375	20		TF	Cluster5
Potra2n15c29002	Potra2n15c29002	ERF	AT4G27950		20	0.00311082	0.000200311	22.2	20		TF and Nitrate responsive TF [2, 3]	Cluster3
Potra2n8c17260	Potra2n8c17260	G2-like	AT2G40260		20	0.000240237	0.000220026	25.8824	20		TF	Cluster8
Potra2n1405s37047	Potra2n1405s37047	GRAS	AT1G55580		20	0.00181314	0.000220569	69.6154	20		TF	Cluster4
Potra2n2c5385	Potra2n2c5385	HD-ZIP	AT4G37790		20	0.000777219	0.000139985	31.2667	20		TF	Cluster6
Potra2n19c33370	Potra2n19c33370	MYB	AT4G21440		20	0.000521385	0.000307333	17.25	20		TF	Cluster1
Potra2n10c21439	Potra2n10c21439	MYB	AT4G38620		20	0.000102493	0.000397162	31.75	20		TF	Cluster8
Potra2n2c5237	Potra2n2c5237	MYB	AT4G37260		20	0.000658814	0.000367253	17.25	20		TF	Cluster1
Potra2n11c22533	Potra2n11c22533	NAC	AT1G33060		20	0.000626201	0.00107089	16.875	20		TF	Cluster3
Potra2n11c22498	Potra2n11c22498	NAC	AT2G46770		20	0.00284529	0.000639483	23.7333	20		TF	Cluster5
Potra2n5c11942	Potra2n5c11942	NAC	AT3G12910		20	0.00290139	0.000351629	12.6154	20		TF	Cluster1
Potra2n4c9865	Potra2n4c9865	SRS	AT2G21400		20	0.00255769	0.000570963	9	20		TF	Cluster1
Potra2n14c27297	Potra2n14c27297	WRKY	AT5G49520		20	0.00252326	0.000722607	11	20		TF	Cluster1
Potra2n13c25523	Potra2n13c25523	WRKY	AT2G40740		20	0.00223247	0.000421386	12.7692	20		TF	Cluster1
Potra2n15c28437	Potra2n15c28437 (QS)		AT5G50210	4h	19	0.000808474	0.0003487	26.0667	19		DEG in this study	Cluster6
Potra2n1c353	Potra2n1c353 (J8)		AT1G80920	4h	19	0.00174369	0.000654164	16.3333	19		DEG in this study	Cluster3
Potra2n4c10054	Potra2n4c10054 (LYP1)		AT2G17120	4h	19	0.00207125	0.000334934	27.1667	19		DEG in this study	Cluster9
Potra2n5c12114	Potra2n5c12114 (GGT1)		AT4G39640	4h	19	0.00172832	0.000181713	23.6667	19		DEG in this study	Cluster5
Potra2n6c14936	Potra2n6c14936 (SIP2)		AT3G57520	4h	19	0.000679717	0.000288567	19.8571	19		DEG in this study	Cluster5
Potra2n5c12694	Potra2n5c12694		AT4G10500	4h	19	0.00202679	0.000717456	15.9286	19		DEG in this study	Cluster3
Potra2n2c4050	Potra2n2c4050			4h	19	0.00108654	0.000202721	24.1333	19		DEG in this study	Cluster6
Potra2n3c6694	Potra2n3c6694 (LNK2)		AT3G54500	8h	19	0.000781663	0.000328887	18	19		DEG in this study	Cluster3
Potra2n10c22356	Potra2n10c22356	ARR-B	AT3G16857		19	0.00062487	0.000308829	23.8	19		TF and Nitrate responsive TF [2, 3]	Cluster5
Potra2n4c10343	Potra2n4c10343	B3			19	0.00438501	0.000499938	25	19		TF	Cluster1
Potra2n6c14888	Potra2n6c14888	bHLH	AT2G42280		19	0.000638213	0.000278831	28.4615	19		TF and Nitrate responsive TF [2, 3]	Cluster5
Potra2n17c31495	Potra2n17c31495	bHLH	AT3G24140		19	0.00307362	0.00036497	9.72727	19		TF	Cluster1
Potra2n2c4129	Potra2n2c4129	bHLH	AT2G20180		19	0.00159679	0.000221787	52.625	19		TF	Cluster4
Potra2n2c4422	Potra2n2c4422	CO-like	AT5G48250		19	0.00147746	0.000185516	43.5714	19		TF	Cluster6
Potra2n6c14086	Potra2n6c14086	ERF	AT1G19210		19	0.000810445	0.000215668	60.2857	19		TF	Cluster1
Potra2n9c18829	Potra2n9c18829	ERF	AT4G25490		19	0.00324794	0.000300067	12.6429	19		TF	Cluster1
Potra2n14c26504	Potra2n14c26504	ERF	AT1G46768		19	0.000248946	0.000406128	46.1667	19		TF	Cluster5
Potra2n19c34077	Potra2n19c34077	ERF	AT5G19790		19	0.00319562	0.000285064	11.6154	19		TF	Cluster1
Potra2n3c6497	Potra2n3c6497	ERF	AT5G19790		19	0.00283162	0.000396366	11.3571	19		TF	Cluster1
Potra2n17c30923	Potra2n17c30923	LBD	AT3G02550		19	0.00471999	0.000894919	14.5625	19		TF	Cluster3
Potra2n6c12880	Potra2n6c12880	MYB	AT1G22640		19	0.0030947	0.000321739	13.6429	19		TF	Cluster1
Potra2n3c7667	Potra2n3c7667	MYB	AT3G02940		19	0.00316279	0.000400126	21.5	19		TF	Cluster10
Potra2n15c28619	Potra2n15c28619	MYB	AT3G28470		19	0.00486137	0.000326799	18.4167	19		TF	Cluster1
Potra2n9c18946	Potra2n9c18946	MYB	AT4G38620		19	0.00114207	0.000149287	53.0714	19		TF	Cluster4
Potra2n1c1494	Potra2n1c1494	MYB	AT5G14750		19	0.00375359	0.000488961	8.33333	19		TF	Cluster1
Potra2n2c5132	Potra2n2c5132	MYB	AT3G60460		19	0.00408411	0.00029581	16.6429	19		TF	Cluster1
Potra2n2c4766	Potra2n2c4766	MYB_related	AT1G01060		19	0.000138283	0.00176445	26.3333	19		TF and Nitrate responsive TF [2, 3]	Cluster3
Potra2n8c18391	Potra2n8c18391	MYB_related	AT1G70000		19	0.00123496	0.000499609	21.6923	19		TF	Cluster3
Potra2n8c17335	Potra2n8c17335	NAC	AT1G79580		19	0.00200631	0.000390696	15.5	19		TF	Cluster1
Potra2n15c28944	Potra2n15c28944	NAC	AT3G17730		19	0.00115849	0.00051983	13.7273	19		TF	Cluster8
Potra2n12c23697	Potra2n12c23697	NAC	AT5G17260		19	0.00270211	0.00055435	10.2857	19		TF	Cluster1
Potra2n360s35405	Potra2n360s35405	NF-YB	AT4G14540		19	0.0011523	0.000420003	20	19		TF	Cluster8
Potra2n9c19538	Potra2n9c19538	SRS	AT5G12330		19	0.00467653	0.000591143	24.0833	19		TF	Cluster1
Potra2n13c25360	Potra2n13c25360	TCP	AT1G72010		19	0.00223713	0.000208751	22.2353	19		TF and Nitrate responsive TF [2, 3]	Cluster5
Potra2n5c12032	Potra2n5c12032	TCP	AT5G23280		19	0.000853951	0.000214015	17.6923	19		TF	Cluster3
Potra2n2c5802	Potra2n2c5802	Trihelix	AT1G76880		19	0.00355147	0.000395663	23.1429	19		TF	Cluster5
Potra2n1c235	Potra2n1c235	Trihelix	AT3G54390		19	0.00127519	0.000209479	28.0625	19		TF	Cluster6
Potra2n1c679	Potra2n1c679 (IGP2)		AT1G56130	2h	18	0.00127811	0.000309593	23.4615	18		DEG in this study	Cluster3
Potra2n10c22127	Potra2n10c22127		AT1G69870	4h	18	0.000828727	0.000489384	14.75	18		DEG in this study and Nitrogen metabolism gene	Cluster5
Potra2n16c30328	Potra2n16c30328		AT5G01370	4h	18	0.00260875	0.000626625	10.6364	18		DEG in this study	Cluster1
Potra2n8c16935	Potra2n8c16935		AT5G04250	4h	18	0.00258547	0.000283393	31.1667	18		DEG in this study	Cluster6
Potra2n5c11136	Potra2n5c11136 (DF1)	Trihelix	AT1G76880	8h	18	0.000661863	0.000327592	22.25	18		TF and DEG in this study	Cluster5
Potra2n4c9297	Potra2n4c9297 (ATC3H14)	C3H	AT1G66810		18	0.00045909	0.000315576	48.6429	18		TF	Cluster5
Potra2n8c17072	Potra2n8c17072 (ZAT11)	C2H2	AT2G37430		18	4.47942e-05	0.000285206	46.4167	18		TF	Cluster5
Potra2n16c30085	Potra2n16c30085	ARF	AT4G30080		18	0.000620559	0.000292516	45.6667	18		TF	Cluster5
Potra2n1c530	Potra2n1c530	ARF	AT5G62000		18	0.000227308	0.000183261	19.9375	18		TF	Cluster3
Potra2n15c29076	Potra2n15c29076	B3			18	0.00121432	0.000299595	37.1818	18		TF	Cluster6
Potra2n3c8314	Potra2n3c8314	B3			18	0.00249732	0.000222254	50.5455	18		TF	Cluster1
[truncated: 1,503 more rows]
