# Supplementary material for: Xylem cells rapidly sense and respond to nitrate to promote expansion
Source: Research Square preprint supplement (doi:10.21203/rs.3.rs-7685028/v2), 2025-10-28
Supplement: Supplementary file 2 [file e8c507c9f4331a2049e365aa.xlsx]

## Sheet: readme
DEGs in literature	List of differentially expressed genes (DEGs) of this study that have been reported nitrate responsive in previous studies. Different columns list the genes that are DEGs in scRNA-seq and time seriesRNA-seq data of this study, in bulk xylem tissue after long term nitrate treatment in P. tremula x P.tremuloides [1], in the trees overexpressing PtCRF4 gene [2], in shoots at different time intervals…
References
[1]	Renström A, Choudhary S, Gandla ML, Jönsson LJ, Hedenström M, Jämtgård S, et al. The effect of nitrogen source and levels on hybrid aspen tree physiology and wood formation. Physiol Plant. 2024;176:e14219.
[2]	Seyfferth C, Wessels BA, Vahala J, Kangasjärvi J, Delhomme N, Hvidsten TR, et al. Populus PtERF85 balances xylem cell expansion and secondary cell wall formation in hybrid aspen. Cells. 2021;10:1971.
[3]	Varala K, Marshall-Colón A, Cirrone J, Brooks MD, Pasquino AV, Léran S, et al. Temporal transcriptional logic of dynamic regulatory networks underlying nitrogen signaling and use in plants. PNAS. 2018;115:6494-6499.
[4]	Krapp A, Berthomé R, Orsel M, Mercey-Boutet S, Yu A, Castaings L, et al. Arabidopsis roots and shoots show distinct temporal adaptation patterns toward nitrogen starvation. Plant Physiol. 2011;157:1255-1282.
[5]	Poovaiah CR, Phalen C, Sniffen GT, Coleman HD. Growth and transcriptional changes in poplar under different nitrogen sources. Plant Mol Biol Reporter. 2019;37:291-302.
[6]	Moreno S, Canales J, Hong L, Robinson D, Roeder AH, Gutiérrez RA. Nitrate defines shoot size through compensatory roles for endoreplication and cell division in Arabidopsis thaliana. Curr Biol. 2020;30:1988-2000. e1983.
[7]	Euring D, Bai H, Janz D, Polle A. Nitrogen-driven stem elongation in poplar is linked with wood modification and gene clusters for stress, photosynthesis and cell wall formation. BMC Plant Biol. 2014;14:391.
[8]	Plavcová L, Hacke UG. Phenotypic and developmental plasticity of xylem in hybrid poplar saplings subjected to experimental drought, nitrogen fertilization, and shading. J Exp Bot. 2012;63:6481-6491.
[9]	Zhou J, Yang L-Y, Chen X, Shi W-G, Deng S-R, Luo Z-B. Genome-Wide identification and characterization of long noncoding RNAs in Populus× canescens roots treated with different nitrogen fertilizers. Frontiers Plant Sci. 2022;13:890453.
[10]	Zhang C, Meng S, Li M, Zhao Z. Transcriptomic insight into nitrogen uptake and metabolism of Populus simonii in response to drought and low nitrogen stresses. Tree Physiol. 2018;38:1672-1684.
[11]	Zhu Y, Li L. Wood of trees: Cellular structure, molecular formation, and genetic engineering. J Integ Plant Biol. 2024;66:443-467.
[12]	Landi S, Esposito S. Nitrate uptake affects cell wall synthesis and modeling. Frontiers Plant Sci. 2017;8:1376.
[13]	Liu K-h, Niu Y, Konishi M, Wu Y, Du H, Sun Chung H, et al. Discovery of nitrate–CPK–NLP signalling in central nutrient–growth networks. Nature. 2017;545:311-316.
[14]	Vidal EA, Alvarez JM, Araus V, Riveras E, Brooks MD, Krouk G, et al. Nitrate in 2020: Thirty years from transport to signaling networks. Plant Cell. 2020;32:2094-2119.
[15]	Ruffel S, Krouk G, Ristova D, Shasha D, Birnbaum KD, Coruzzi GM. Nitrogen economics of root foraging: transitive closure of the nitrate–cytokinin relay and distinct systemic signaling for N supply vs. demand. PNAS. 2011;108:18524-18529.
[16]	Bouguyon E, Gojon A, Nacry P: Nitrate sensing and signaling in plants. Cell & Dev Biol. Elsevier; 2012: 648-654.
[17]	Krouk G, Mirowski P, LeCun Y, Shasha DE, Coruzzi GM. Predictive network modeling of the high-resolution dynamic plant transcriptome in response to nitrate. Genome Biol. 2010;11:1-19.
[18]	Bai H, Euring D, Volmer K, Janz D, Polle A. The nitrate transporter (NRT) gene family in poplar. PloS One. 2013;8:e72126.
[19]	Liu R, Jia T, Cui B, Song J. The expression patterns and putative function of nitrate transporter 2.5 in plants. Plant Signal Behav. 2020;15:1815980.
[20]	Rubin G, Tohge T, Matsuda F, Saito K, Scheible W-Rd. Members of the LBD family of transcription factors repress anthocyanin synthesis and affect additional nitrogen responses in Arabidopsis. Plant Cell. 2009;21:3567-3584.
[21]	Dash M, Yordanov YS, Georgieva T, Kumari S, Wei H, Busov V. A systems biology approach identifies new regulators of poplar root development under low nitrogen. Plant J. 2015;84:335-346.
[22]	Scheible W-R, Morcuende R, Czechowski T, Fritz C, Osuna D, Palacios-Rojas N, et al. Genome-wide reprogramming of primary and secondary metabolism, protein synthesis, cellular growth processes, and the regulatory infrastructure of Arabidopsis in response to nitrogen. Plant Physiol. 2004;136:2483-2499.
[23]	Alvarez JM, Schinke A-L, Brooks MD, Pasquino A, Leonelli L, Varala K, et al. Transient genome-wide interactions of the master transcription factor NLP7 initiate a rapid nitrogen-response cascade. Nat Comm. 2020;11:1157.
[24]	Bouguyon E, Brun F, Meynard D, Kubeš M, Pervent M, Leran S, et al. Multiple mechanisms of nitrate sensing by Arabidopsis nitrate transceptor NRT1. 1. Nat Plants. 2015;1:1-8.
[25]	Song L, Xu G, Li T, Zhou H, Lin Q, Chen J, et al. The RALF1-FERONIA complex interacts with and activates TOR signaling in response to low nutrients. Mol Plant. 2022;15:1120-1136.
[26]	Sun X, Cao L, Zhang S, Yu J, Xu X, Xu C, et al. Genome-wide analysis of the RGP gene family in Populus trichocarpa and their expression under nitrogen treatment. Gene Expr Patt. 2020;38:119142.
[27]	Sreedasyam A, Plott C, Hossain MS, Lovell JT, Grimwood J, Jenkins JW, et al. JGI Plant Gene Atlas: an updateable transcriptome resource to improve functional gene descriptions across the plant kingdom. Nucl Acids Res. 2023;51:8383-8401.
[28]	Ho C-H, Lin S-H, Hu H-C, Tsay Y-F. CHL1 functions as a nitrate sensor in plants. Cell. 2009;138:1184-1194.
[29]	Maeda Y, Konishi M, Kiba T, Sakuraba Y, Sawaki N, Kurai T, et al. A NIGT1-centred transcriptional cascade regulates nitrate signalling and incorporates phosphorus starvation signals in Arabidopsis. Nat Comm. 2018;9:1376.
[30]	Wang R, Okamoto M, Xing X, Crawford NM. Microarray analysis of the nitrate response in Arabidopsis roots and shoots reveals over 1,000 rapidly responding genes and new linkages to glucose, trehalose-6-phosphate, iron, and sulfate metabolism. Plant Physiol. 2003;132:556-567.
[31]	Canales J, Moyano TC, Villarroel E, Gutiérrez RA. Systems analysis of transcriptome data provides new hypotheses about Arabidopsis root response to nitrate treatments. Frontiers Plant Sci. 2014;5:22.
[32]	Fang Q-X, Cheng H, Ma Z, Xu Q, Wang H, Yan Y, et al. Rapeseed transcription factor BnaC9bHLH35 promotes root growth and improves nitrogen use efficiency under low nitrate conditions. Theor Appl Genet. 2025;138:162.
[33]	Zhao H, Qu C, Zuo Z, Cao L, Zhang S, Xu X, et al. Genome identification and expression profiles in response to nitrogen treatment analysis of the class I CCoAOMT gene family in Populus. Biochem Genet. 2022;60:656-675.
[34]	Vidal EA, Moyano TC, Krouk G, Katari MS, Tanurdzic M, McCombie WR, et al. Integrated RNA-seq and sRNA-seq analysis identifies novel nitrate-responsive genes in Arabidopsis thaliana roots. BMC Genomics. 2013;14:701.

## Sheet: DEGs_in_Literature
GeneId	Best Arabidospis hit	TAIR_description	TF family	scRNASeq (This study)	Bulk time series (This study)	Bulk long term [1]	Overexpression of CRF4 or ERF85 [2]	Time bin [3]	Other references
Potra2n8c17208	AT4G00430	plasma membrane intrinsic protein 1;4|PIP1;4,PIP1E,TMP-C		up					10d down [4]; down nit vs amm (phytozome data [27])
Potra2n1c3764	AT1G64720	Polyketide cyclase/dehydrase and lipid transport superfamily protein|CP5		up				010min	10d down [4]; down nit vs amm (phytozome data [27]); CRF4, SNZ, CDF1, HHO5 target [3]
Potra2n18c32429	AT4G25780	CAP (Cysteine-rich secretory proteins, Antigen 5, and Pathogenesis-related 1 protein) superfamily protein		down					10d down [4]; up 0N vs 15NO [5]
Potra2n17c31708	AT1G05260	Peroxidase superfamily protein|RCI3,RCI3A			up				10d down [4]; up 0N vs 15NO [5]; DEG in response to external nitrate concentration in shoots [6]
Potra2n16c30257	AT2G37980	O-fucosyltransferase family protein		up					10d down [4]; up nit vs amm (phytozome data [27]); DEG [5]
Potra2n8c18353	AT5G40460	cyclin-dependent kinase inhibitor SMR3-like protein			up				10d down [4]; up nit vs amm (phytozome data [27]); up 0N vs 15NO [5]
Potra2n4c10363	AT1G09795	ATP phosphoribosyl transferase 2|ATATP-PRT2,ATP-PRT2,HISN1B		up				020min	10d down [4]; up nit vs amm (phytozome data [27]); PHL1 target [3]
Potra2n6c14201	AT2G37040	PHE ammonia lyase 1|ATPAL1,PAL1		up					10d up [4]; down nit vs amm (phytozome data [27]); down 0N vs 15NO [5]; DEG in response to external nitrate concentration in shoots [6]
Potra2n4c9970	AT2G16660	Major facilitator superfamily protein		up					10d up [4]; up [7]; up High N vs Adequate N [8]; up nit vs amm (phytozome data [27]); DEG in response to external nitrate concentration in shoots [6]
Potra2n8c18502	AT5G19140	aluminum induced protein with YGL and LRDR motifs|AILP1,ATAILP1		down					10d up [4]; up nitrate vs amm nitrate [9]; down nit vs amm (phytozome data [27])
Potra2n6c13356	AT2G01490	phytanoyl-CoA dioxygenase (PhyH) family protein		up					2d down [4]; N transport putative; up nit vs amm (phytozome data [27]); up 0N vs 15NO [5]
Potra2n12c24069	AT1G68090	annexin 5		up					2d up [4]; up nit vs amm (phytozome data [27]); DEG [5]
Potra2n13c25662	AT1G03220	Eukaryotic aspartyl protease family protein		up					DEG in response to external nitrate concentration in shoots [6]
Potra2n5c10888	AT1G08230	Transmembrane amino acid transporter family protein			down				DEG in response to external nitrate concentration in shoots [6]
Potra2n9c19482	AT1G12740	cytochrome P450, family 87, subfamily A, polypeptide 2|CYP87A2			up				DEG in response to external nitrate concentration in shoots [6]
Potra2n1c3711	AT1G17180	glutathione S-transferase TAU 25|ATGSTU25,GSTU25			down				DEG in response to external nitrate concentration in shoots [6]
Potra2n1c1484	AT1G17430	alpha/beta-Hydrolases superfamily protein			down	up			DEG in response to external nitrate concentration in shoots [6]
Potra2n3c7236	AT1G64390	glycosyl hydrolase 9C2|AtGH9C2,GH9C2		up		down			DEG in response to external nitrate concentration in shoots [6]
Potra2n5c11751	AT1G75440	ubiquitin-conjugating enzyme 16|UBC16		up					DEG in response to external nitrate concentration in shoots [6]
Potra2n2c6238	AT1G75750	GAST1 protein homolog 1|GASA1			up				DEG in response to external nitrate concentration in shoots [6]
Potra2n1c3716	AT1G78340	glutathione S-transferase TAU 22|ATGSTU22,GSTU22			down	up			DEG in response to external nitrate concentration in shoots [6]
Potra2n7c16146	AT2G17820	histidine kinase 1|AHK1,ATHK1,HK1	RR		up	down			DEG in response to external nitrate concentration in shoots [6]
Potra2n7c16104	AT2G17820	histidine kinase 1|AHK1,ATHK1,HK1	RR		up				DEG in response to external nitrate concentration in shoots [6]
Potra2n268s35171	AT2G17820	histidine kinase 1|AHK1,ATHK1,HK1	RR		up				DEG in response to external nitrate concentration in shoots [6]
Potra2n1c1954	AT2G26980	CBL-interacting protein kinase 3|CIPK3,SnRK3.17			up				DEG in response to external nitrate concentration in shoots [6]
Potra2n12c24727	AT2G35120	Single hybrid motif superfamily protein		down					DEG in response to external nitrate concentration in shoots [6]
Potra2n14c27161	AT2G46630	serine/arginine repetitive matrix protein			up				DEG in response to external nitrate concentration in shoots [6]
Potra2n4c9102	AT3G03270	Adenine nucleotide alpha hydrolases-like superfamily protein			up				DEG in response to external nitrate concentration in shoots [6]
Potra2n11c22646	AT3G21710	transmembrane protein		down					DEG in response to external nitrate concentration in shoots [6]
Potra2n16c29402	AT3G22200	Pyridoxal phosphate (PLP)-dependent transferases superfamily protein|GABA-T,HER1,POP2		down					DEG in response to external nitrate concentration in shoots [6]
Potra2n12c24304	AT3G47780	ABC2 homolog 6|ATATH6,ATH6		up					DEG in response to external nitrate concentration in shoots [6]
Potra2n8c17513	AT3G53480	pleiotropic drug resistance 9|ABCG37,ATPDR9,PDR9,PIS1			up				DEG in response to external nitrate concentration in shoots [6]
Potra2n6c13327	AT4G33050	calmodulin-binding family protein|EDA39		up					DEG in response to external nitrate concentration in shoots [6]
Potra2n5c12114	AT4G39640	gamma-glutamyl transpeptidase 1|GGT1			up	down			DEG in response to external nitrate concentration in shoots [6]
Potra2n1c2481	AT5G10530	Concanavalin A-like lectin protein kinase family protein		up					DEG in response to external nitrate concentration in shoots [6]
Potra2n5c11916	AT5G42510	Disease resistance-responsive (dirigent-like protein) family protein			up	down			DEG in response to external nitrate concentration in shoots [6]
Potra2n12c23757	AT5G54130	Calcium-binding endonuclease/exonuclease/phosphatase family			up			010min	CDF1 target [3]; down nit vs amm (phytozome data [27]); DEG [10]
Potra2n14c27633	AT2G05710	aconitase 3|ACO3		up				030min	CDF1 target [3]
Potra2n12c23912	AT5G53460	NADH-dependent glutamate synthase 1|GLT1		up	up			020min	CDF1 target [3]
Potra2n1c2501	AT5G56030	heat shock protein 81-2|AtHsp90.2,ERD8,HSP81-2,HSP90.2		up				None	CDF1 target [3]
Potra2n12c24791	AT5G62190	DEAD box RNA helicase (PRH75)|PRH75		up				090min	CDF1 target [3]
Potra2n1c908	AT5G62020	heat shock transcription factor B2A|AT-HSFB2A,HSFB2A	HSF	up				010min	CDF1 target [3] up nit vs amm (phytozome data [27]); DEG in response to external nitrate concentration in shoots [6]
Potra2n5c12188	AT2G22300	signal responsive 1|CAMTA3,SR1	CG1	up				None	CDF1 target [3]; down nit vs amm (phytozome data [27])
Potra2n18c33127	AT5G27640	translation initiation factor 3B1	WD40	up				None	CDF1 target [3]; down nit vs amm (phytozome data [27])
Potra2n5c12120	AT5G58950	Protein kinase superfamily protein		up				None	CDF1 target [3]; down nit vs amm (phytozome data [27])
Potra2n1c463	AT1G27930	glucuronoxylan 4-O-methyltransferase-like protein (DUF579)			down			045min	CDF1 target [3]; down nit vs amm (phytozome data [27]); up 0N vs 15NO [5]
Potra2n1c2645	AT4G34110	poly(A) binding protein 2|ATPAB2,PAB2,PABP2		up				090min	CDF1 target [3]; down nitrate vs amm nitrate [9]; down nit vs amm (phytozome data [27])
Potra2n1c3910	AT1G30690	Sec14p-like phosphatidylinositol transfer family protein		up				045min	CDF1 target [3]; down nitrate vs amm nitrate [9]; up nit vs amm (phytozome data [27])
Potra2n1c3018	AT5G50180	Protein kinase superfamily protein		up				None	CDF1 target [3]; up nit vs amm (phytozome data [27])
Potra2n4c9619	AT5G46240	1|KAT1			up			045min	CDF1 target [3]; up nitrate vs amm nitrate [9]; up nit vs amm (phytozome data [27])
Potra2n700s36526	AT5G40850	urophorphyrin methylase 1		up	up			010min	CDF1, HHO6, PHL1 taget [3]; down nit vs amm (phytozome data [27]); DEG [5]; DEG in response to external nitrate concentration in shoots [6]
Potra2n18c32440	AT4G25810	xyloglucan endotransglycosylase 6|XTH23,XTR6		up	up				Cell wall modelling [11], related to nitrate transport XTR [12]; down nit vs amm (phytozome data [27])
Potra2n12c24321	AT1G18890	calcium-dependent protein kinase 1|ATCDPK1,CDPK1,CPK10		up					Central nutrient-growth network [13]
Potra2n2c5606	AT1G37130	nitrate reductase 2|ATNR2,B29,CHL3,NIA2,NIA2-1,NR,NR2		up	up			010min	CRF4 [3]; up nit vs amm (phytozome data [27]); DEG [10]; DEG in response to external nitrate concentration in shoots [6]
Potra2n8c17703	AT3G25780	allene oxide cyclase 3|AOC3			up			None	CRF4 SNZ CDF1 HHO5 HHO6 PHL1 target [3]; down nit vs amm (phytozome data [27])
Potra2n8c17540	AT3G06500	Plant neutral invertase family protein		up				120min	CRF4 SNZ CDF1 HHO5 HHO6 target [3]; down nit vs amm (phytozome data [27]); DEG [10]
Potra2n2c6133	AT1G75280	NmrA-like negative transcriptional regulator family protein		down				090min	CRF4 SNZ CDF1 HHO5 HHO6 target [3]; up nit vs amm (phytozome data [27]); DEG [10]
Potra2n714s36572	AT5G10530	Concanavalin A-like lectin protein kinase family protein		up				030min	CRF4 SNZ CDF1 HHO5 HHO6 target [3]; up nit vs amm (phytozome data [27]); DEG [10]; DEG in response to external nitrate concentration in shoots [6]
Potra2n4c8518	AT4G04610	APS reductase 1|APR,APR1,ATAPR1,PRH19		up	up			010min	CRF4 SNZ CDF1 HHO5 HHO6 target [3]; up nit vs amm (phytozome data [27]); DEG [10]; down 0N vs 15NO [5]; DEG in response to external nitrate concentration in shoots [6]
Potra2n2c4565	AT4G02380	senescence-associated gene 21|AtLEA5,SAG21			up			010min	CRF4 SNZ CDF1 HHO5 target [3]; down nit vs amm (phytozome data [27]); up 0N vs 15NO [5]; DEG in response to external nitrate concentration in shoots [6]
Potra2n9c19823	AT3G46620	zinc finger (C3HC4-type RING finger) family protein	C2H2	up					CRF4 SNZ CDF1 HHO5 target [3]; up nit vs amm (phytozome data [27]); DEG [10]; DEG [5]
Potra2n1c2237	AT5G04590	sulfite reductase|SIR		up	up			120min	CRF4 SNZ CDF1 target [3]; up nit vs amm (phytozome data [27]); DEG [10]
Potra2n9c20041	AT1G08090	nitrate transporter 2:1|ACH1,ATNRT2.1,ATNRT2:1,LIN1,NRT2,NRT2.1,NRT2:1,NRT2;1AT		up				010min	CRF4 target [3] ; DEG [10]
Potra2n19c33793	AT1G71360	Galactose-binding protein		up				045min	CRF4 target [3] ; DEG [10]
Potra2n1c890	AT3G48990	AMP-dependent synthetase and ligase family protein		up				045min	CRF4 target [3] ; down nit vs amm (phytozome data [27]); DEG [10]; up 0N vs 15NO [5]
Potra2n2c4118	AT2G20260	photosystem I subunit E-2|PSAE-2		down					CRF4 target [3] ; up nit vs amm (phytozome data [27]); DEG [10]; DEG [5]
Potra2n1c3259	AT4G05390	root FNR 1|ATRFNR1,RFNR1		up	up			010min	CRF4 target [3]; up nit vs amm (phytozome data [27]); First target of systemic signals is N uptake and metabolism, transient and early response [14, 15, 16, 17]
Potra2n1c1285	AT4G17670	senescence-associated family protein (DUF581)		down				None	CRF4, CDF1 target [3]; up nit vs amm (phytozome data [27]); DEG [10]; down 0N vs 15NO [5]
Potra2n12c24199	AT1G68710	ATPase E1-E2 type family protein / haloacid dehalogenase-like hydrolase family protein		up				None	CRF4, CDF1, SNZ, HHO5 target [3]
Potra2n1c2248	AT5G12860	dicarboxylate transporter 1|DiT1		up				015min	CRF4, CDF1, SNZ, HHO5 target [3]
Potra2n1c106	AT1G05575	transmembrane protein		up				090min	CRF4, HHO6, PHL1 target [3]
Potra2n10c22118	AT1G10370	Glutathione S-transferase family protein|ATGSTU17,ERD9,GST30,GST30B		up	up				DEG [5]
Potra2n2c5243	AT1G47490	RNA-binding protein 47C|ATRBP47C,RBP47C		up	up			090min	DEG [5]
Potra2n7c16022	AT1G48920	nucleolin like 1|ATNUC-L1,NUC-L1,PARL1		up				090min	DEG [5]
Potra2n8c17803	AT2G01290	ribose-5-phosphate isomerase 2|RPI2		up				045min	DEG [5]
Potra2n18c32703	AT2G06050	oxophytodienoate-reductase 3|DDE1,OPR3		up					DEG [5]
Potra2n9c18689	AT2G27510	ferredoxin 3|ATFD3,FD3		up	up				DEG [5]
Potra2n14c27158	AT2G46620	P-loop containing nucleoside triphosphate hydrolases superfamily protein		up					DEG [5]
Potra2n4c9454	AT3G30390	Transmembrane amino acid transporter family protein		up					DEG [5]
Potra2n4c10104	AT3G44750	histone deacetylase 3|ATHD2A,HD2A,HDA3,HDT1	C2H2	up				060min	DEG [5]
Potra2n4c9589	AT4G39730	Lipase/lipooxygenase, PLAT/LH2 family protein		up	up				DEG [5]
Potra2n16c30308	AT5G01530	light harvesting complex photosystem II|LHCB4.1		down					DEG [5]
Potra2n8c17602	AT5G49360	beta-xylosidase 1|ATBXL1,BXL1			up				DEG [5]
Potra2n12c24758	AT5G62350	Plant invertase/pectin methylesterase inhibitor superfamily protein		up					DEG [5]
Potra2n5c11036				up					DEG [5]
Potra2n9c20067	AT5G22920	CHY-type/CTCHY-type/RING-type Zinc finger protein	C2H2		up				DEG [5]; CDF1 target [3]
Potra2n1c425	AT1G04680	Pectin lyase-like superfamily protein		up					DEG [10]
Potra2n1c2433	AT1G07120	CHUP1-like protein		down					DEG [10]
Potra2n4c10280	AT1G08080	alpha carbonic anhydrase 7|ACA7,ATACA7		up					DEG [10]
Potra2n4c10059	AT1G08290	WIP domain protein 3|WIP3	C2H2	up					DEG [10]
Potra2n17c30852	AT1G15125	S-adenosyl-L-methionine-dependent methyltransferases superfamily protein		up					DEG [10]
Potra2n2c6137	AT1G19600	pfkB-like carbohydrate kinase family protein		up	up	up		090min	DEG [10]
Potra2n2c5519	AT1G22360	UDP-glucosyl transferase 85A2|AtUGT85A2,UGT85A2			up				DEG [10]
Potra2n15c28127	AT1G23210	glycosyl hydrolase 9B6|AtGH9B6,GH9B6			up				DEG [10]
Potra2n8c17746	AT1G25400	transmembrane protein			up				DEG [10]
Potra2n4c8835	AT1G28440	HAESA-like 1|HSL1		up					DEG [10]
Potra2n11c23195	AT1G29270	transcription factor bHLH35-like protein			down				DEG [10]
Potra2n18c32090	AT1G50180	NB-ARC domain-containing disease resistance protein		up					DEG [10]
Potra2n3c7886	AT1G53840	pectin methylesterase 1|ATPME1,PME1		up					DEG [10]
Potra2n11c23466	AT1G61740	Sulfite exporter TauE/SafE family protein			up				DEG [10]
Potra2n1c815	AT1G64060	respiratory burst oxidase protein F|ATRBOH F,ATRBOHF,RBOH F,RBOHAP108,RBOHF		up					DEG [10]
Potra2n8c17414	AT1G69500	cytochrome P450, family 704, subfamily B, polypeptide 1|CYP704B1	NAM		up				DEG [10]
Potra2n2c5866	AT1G69640	sphingoid base hydroxylase 1|SBH1		up					DEG [10]
Potra2n13c25348	AT1G71960	ATP-binding casette family G25|ABCG25,ATABCG25			down				DEG [10]
Potra2n18c32725	AT1G74960	fatty acid biosynthesis 1|ATKAS2,FAB1,KAS2			down				DEG [10]
Potra2n11c22574	AT1G76490	hydroxy methylglutaryl CoA reductase 1|HMG1,HMGR1			up	down			DEG [10]
Potra2n7c16624	AT1G78955	camelliol C synthase 1			down				DEG [10]
Potra2n18c32855	AT1G79750	NADP-malic enzyme 4|ATNADP-ME4,NADP-ME4		up					DEG [10]
Potra2n10c21453	AT2G01430	homeobox-leucine zipper protein 17|ATHB-17,ATHB17,HB17	Homobox	up					DEG [10]
Potra2n8c17940	AT2G02090	SNF2 domain-containing protein / helicase domain-containing protein|CHA19,CHR19,ETL1	bHLH		down				DEG [10]
Potra2n16c29649	AT2G05990	NAD(P)-binding Rossmann-fold superfamily protein|ENR1,MOD1			down	up			DEG [10]
Potra2n18c32477	AT2G18910	hydroxyproline-rich glycoprotein family protein		down					DEG [10]
Potra2n6c14686	AT2G19170	subtilisin-like serine protease 3|SLP3		up					DEG [10]
Potra2n4c9964	AT2G21050	like AUXIN RESISTANT 2|LAX2		down					DEG [10]
Potra2n18c33188	AT2G24540	Galactose oxidase/kelch repeat superfamily protein|AFR		up					DEG [10]
Potra2n6c12942	AT2G24860	DnaJ/Hsp40 cysteine-rich domain superfamily protein		up					DEG [10]
Potra2n2c5232	AT2G26510	Xanthine/uracil permease family protein			up				DEG [10]
Potra2n19c34265	AT2G26560	phospholipase A 2A|PLA IIA,PLA2A,PLP2		up		down			DEG [10]
Potra2n3c6915	AT2G33205	Serinc-domain containing serine and sphingolipid biosynthesis protein		up					DEG [10]
Potra2n6c13502	AT2G36080	AP2/B3-like transcriptional factor family protein	B3		up			010min	DEG [10]
Potra2n6c14433	AT2G38290	ammonium transporter 2|AMT2,AMT2;1,ATAMT2		up	up				DEG [10]
Potra2n10c20597	AT2G39518	Uncharacterized protein family (UPF0497)		up					DEG [10]
Potra2n1c173	AT2G41540	6-phosphogluconate dehydrogenase family protein|GPDHC1		up					DEG [10]
Potra2n1c1993	AT2G44350	Citrate synthase family protein		up					DEG [10]
Potra2n14c27372	AT2G47500	P-loop nucleoside triphosphate hydrolases superfamily protein with CH (Calponin Homology) domain-containing protein		down					DEG [10]
Potra2n13c26069	AT3G05200	RING/U-box superfamily protein|ATL6	C2H2	up					DEG [10]
Potra2n14c27283	AT3G06490	myb domain protein 108|AtMYB108,BOS1,MYB108	MYB	up					DEG [10]
Potra2n11c23358	AT3G09010	Protein kinase superfamily protein		up					DEG [10]
Potra2n8c16766	AT3G10600	cationic amino acid transporter 7			down	up			DEG [10]
Potra2n19c34342	AT3G14840	Leucine-rich repeat transmembrane protein kinase			down	up			DEG [10]
Potra2n9c19172	AT3G19000	2-oxoglutarate (2OG) and Fe(II)-dependent oxygenase superfamily protein			up				DEG [10]
Potra2n10c21739	AT3G22910	ATPase E1-E2 type family protein / haloacid dehalogenase-like hydrolase family protein		up					DEG [10]
Potra2n18c32629	AT3G24440	Fibronectin type III domain-containing protein		up				045min	DEG [10]
Potra2n4c9412	AT3G25180	cytochrome P450, family 82, subfamily G, polypeptide 1|CYP82G1			up				DEG [10]
Potra2n1c2893	AT3G27150	Galactose oxidase/kelch repeat superfamily protein		up					DEG [10]
Potra2n16c30512	AT3G48310	cytochrome P450, family 71, subfamily A, polypeptide 22|CYP71A22			up				DEG [10]
Potra2n3c8154	AT3G52820	purple acid phosphatase 22|ATPAP22,PAP22			up				DEG [10]
Potra2n10c20378	AT3G54880	zinc finger protein		up					DEG [10]
Potra2n8c16964	AT3G54960	PDI-like 1-3|ATPDI1,ATPDIL1-3,PDI1,PDIL1-3			up				DEG [10]
Potra2n8c17116	AT3G55430	O-Glycosyl hydrolases family 17 protein		up					DEG [10]
Potra2n4c10477	AT3G61220	NAD(P)-binding Rossmann-fold superfamily protein		up		up			DEG [10]
Potra2n2c6001	AT3G63300	FORKED 1|FKD1		up	up				DEG [10]
Potra2n1c685	AT4G00870	basic helix-loop-helix (bHLH) DNA-binding superfamily protein	bHLH		up				DEG [10]
Potra2n9c19376	AT4G08170	Inositol 1,3,4-trisphosphate 5/6-kinase family protein			up	down			DEG [10]
Potra2n18c32115	AT4G10310	high-affinity K+ transporter 1|ATHKT1,HKT1			up				DEG [10]
Potra2n5c12694	AT4G10500	2-oxoglutarate (2OG) and Fe(II)-dependent oxygenase superfamily protein			up				DEG [10]
Potra2n8c18221	AT4G13430	isopropyl malate isomerase large subunit 1|ATLEUC1,IIL1			up				DEG [10]
Potra2n14c27657	AT4G15420	Ubiquitin fusion degradation UFD1 family protein	C2H2	up					DEG [10]
Potra2n266s35156	AT4G15560	Deoxyxylulose-5-phosphate synthase|CLA,CLA1,DEF,DXPS2,DXS			up				DEG [10]
Potra2n1c1053	AT4G17260	Lactate/malate dehydrogenase family protein		up	up				DEG [10]
Potra2n19c33457	AT4G20970	basic helix-loop-helix (bHLH) DNA-binding superfamily protein	bHLH		up				DEG [10]
Potra2n13c25173	AT4G20970	basic helix-loop-helix (bHLH) DNA-binding superfamily protein	bHLH	up		down			DEG [10]
Potra2n12c24793	AT4G21120	amino acid transporter 1		up					DEG [10]
Potra2n15c28059	AT4G23030	MATE efflux family protein		up					DEG [10]
Potra2n15c28407	AT4G24780	Pectin lyase-like superfamily protein		up					DEG [10]
Potra2n6c15114	AT4G25200	mitochondrion-localized small heat shock protein 23.6|ATHSP23.6-MITO,HSP23.6-MITO			down				DEG [10]
Potra2n4c8471	AT4G26890	mitogen-activated protein kinase kinase kinase 16|MAPKKK16		up					DEG [10]
Potra2n18c31948	AT4G28400	Protein phosphatase 2C family protein			up				DEG [10]
Potra2n6c13785	AT4G30470	NAD(P)-binding Rossmann-fold superfamily protein			up				DEG [10]
Potra2n14c26607	AT4G31940	cytochrome P450, family 82, subfamily C, polypeptide 4|CYP82C4		down		down			DEG [10]
Potra2n18c32866	AT4G32880	homeobox-leucine zipper protein ATHB-8|ATHB-8,ATHB8,HB-8	Homobox	up					DEG [10]
Potra2n7c16382	AT4G36670	Major facilitator superfamily protein		up					DEG [10]
Potra2n9c19467	AT4G37990	cinnamyl alcohol dehydrogenase 8|ATCAD8,CAD-B2,ELI3,ELI3-2		up					DEG [10]
Potra2n4c10039	AT4G38400	expansin-like A2|ATEXLA2,ATEXPL2,ATHEXP BETA 2.2,EXLA2,EXPL2		up					DEG [10]
Potra2n4c10024	AT4G38470	ACT-like protein tyrosine kinase family protein			up				DEG [10]
Potra2n4c9980	AT4G38620	myb domain protein 4|ATMYB4,MYB4	MYB	down					DEG [10]
Potra2n6c14450	AT5G05600	2-oxoglutarate (2OG) and Fe(II)-dependent oxygenase superfamily protein		up					DEG [10]
Potra2n16c29670	AT5G06800	myb-like HTH transcriptional regulator family protein	MYB		up				DEG [10]
Potra2n6c14878	AT5G06860	polygalacturonase inhibiting protein 1|ATPGIP1,PGIP1		up					DEG [10]
Potra2n12c24277	AT5G07800	Flavin-binding monooxygenase family protein		down					DEG [10]
Potra2n19c33575	AT5G09360	laccase 14|LAC14		up					DEG [10]
Potra2n3c6974	AT5G13110	glucose-6-phosphate dehydrogenase 2|G6PD2		up	up				DEG [10]
Potra2n3c7000	AT5G13200	GRAM domain family protein		up					DEG [10]
Potra2n13c25709	AT5G17850	Sodium/calcium exchanger family protein		up					DEG [10]
Potra2n18c32188	AT5G33280	Voltage-gated chloride channel family protein			up				DEG [10]
Potra2n11c22478	AT5G36110	cytochrome P450, family 716, subfamily A, polypeptide 1			up				DEG [10]
Potra2n15c28938	AT5G37490	ARM repeat superfamily protein		up					DEG [10]
Potra2n8c17894	AT5G37490	ARM repeat superfamily protein		up					DEG [10]
Potra2n4c9507	AT5G38970	brassinosteroid-6-oxidase 1			down				DEG [10]
Potra2n10c21812	AT5G43420	RING/U-box superfamily protein	C2H2	up					DEG [10]
Potra2n3c7764	AT5G47070	Protein kinase superfamily protein		up					DEG [10]
Potra2n9c19489	AT5G48060	C2 calcium/lipid-binding plant phosphoribosyltransferase family protein			down				DEG [10]
Potra2n14c27343	AT5G49330	myb domain protein 111|ATMYB111,MYB111,PFG3	MYB	up					DEG [10]
Potra2n7c15962	AT5G50080	ethylene response factor 110|ERF110	AP2	up					DEG [10]
Potra2n548s35914	AT5G54590	Protein kinase superfamily protein|CRLK1		up					DEG [10]
Potra2n18c32065	AT5G57150	basic helix-loop-helix (bHLH) DNA-binding superfamily protein	bHLH	up					DEG [10]
Potra2n633s36227	AT5G57510	cotton fiber protein			up				DEG [10]
Potra2n6c13811	AT5G57710	Double Clp-N motif-containing P-loop nucleoside triphosphate hydrolases superfamily protein		up					DEG [10]
Potra2n8c17176	AT5G59720	heat shock protein 18.2|HSP18.2		up					DEG [10]
Potra2n4c10288	AT5G60760	P-loop containing nucleoside triphosphate hydrolases superfamily protein		up					DEG [10]
Potra2n15c28531	AT5G62520	similar to RCD one 5|SRO5		up					DEG [10]
Potra2n3c7593					down				DEG [10]
Potra2n1c2125				down					DEG [10]
Potra2n4c8828				up					DEG [10]
Potra2n3c7126				up					DEG [10]
Potra2n13c25744				up					DEG [10]
Potra2n10c21303				up					DEG [10]
Potra2n15c28669				up					DEG [10]
Potra2n11c22566	AT1G76520	Auxin efflux carrier family protein			down				DEG [10]; DEG in response to external nitrate concentration in shoots [6]
Potra2n5c11223	AT1G77330	2-oxoglutarate (2OG) and Fe(II)-dependent oxygenase superfamily protein			down	up			DEG [10]; DEG in response to external nitrate concentration in shoots [6]
Potra2n2c4172	AT3G07320	O-Glycosyl hydrolases family 17 protein		up					DEG [10]; DEG in response to external nitrate concentration in shoots [6]
Potra2n15c29046	AT3G22370	alternative oxidase 1A|AOX1A,ATAOX1A			down	down			DEG [10]; DEG in response to external nitrate concentration in shoots [6]
Potra2n10c20471	AT1G07900	LOB domain-containing protein 1|LBD1	AS2	up					DEG [10]; DEG [5]
Potra2n8c17951	AT1G14520	myo-inositol oxygenase 1|MIOX1		down					DEG [10]; DEG [5]
Potra2n1c2238	AT1G51400	Photosystem II 5 kD protein		down					DEG [10]; DEG [5]
Potra2n1c1535	AT1G52720	hypothetical protein		down					DEG [10]; DEG [5]
Potra2n13c25422	AT1G76690	12-oxophytodienoate reductase 2|ATOPR2,OPR2		up					DEG [10]; DEG [5]
Potra2n5c10911	AT2G38810	histone H2A 8|HTA8	Hap3/NF	down					DEG [10]; DEG [5]
Potra2n13c26012	AT3G05060	NOP56-like pre RNA processing ribonucleoprotein		up				045min	DEG [10]; DEG [5]
Potra2n5c10826	AT4G28530	NAC domain containing protein 74|anac074,NAC074	NAM		down	up			DEG [10]; DEG [5]
Potra2n4c9969	AT4G38650	Glycosyl hydrolase family 10 protein		up					DEG [10]; DEG [5]
Potra2n7c15841	AT5G63770	diacylglycerol kinase 2|ATDGK2,DGK2		up					DEG [10]; DEG [5]
Potra2n10c20889	AT1G16390	organic cation/carnitine transporter 3|3-Oct,ATOCT3		down					DEG [10]; down 0N vs 15NO [5]
Potra2n1c922	AT1G33720	cytochrome P450, family 76, subfamily C, polypeptide 6			down				DEG [10]; down 0N vs 15NO [5]
Potra2n9c19357	AT1G49960	Xanthine/uracil permease family protein			down	up			DEG [10]; down 0N vs 15NO [5]
Potra2n3c6760	AT2G03220	fucosyltransferase 1|ATFT1,ATFUT1,FT1,MUR2			down				DEG [10]; down 0N vs 15NO [5]
Potra2n5c12213	AT2G22420	Peroxidase superfamily protein		up					DEG [10]; down 0N vs 15NO [5]
Potra2n16c30483	AT2G38500	2-oxoglutarate (2OG) and Fe(II)-dependent oxygenase superfamily protein		down					DEG [10]; down 0N vs 15NO [5]
Potra2n13c25884	AT3G04530	phosphoenolpyruvate carboxylase kinase 2|ATPPCK2,PEPCK2,PPCK2			up				DEG [10]; down 0N vs 15NO [5]
Potra2n14c26993	AT4G00440	GPI-anchored adhesin-like protein, putative (DUF3741)		down					DEG [10]; down 0N vs 15NO [5]
Potra2n7c16449	AT4G36470	S-adenosyl-L-methionine-dependent methyltransferases superfamily protein			down	down			DEG [10]; down 0N vs 15NO [5]
Potra2n17c30674	AT5G37478	TPX2 (targeting protein for Xklp2) protein family		down					DEG [10]; down 0N vs 15NO [5]
Potra2n18c32412	AT5G57670	Protein kinase superfamily protein		down					DEG [10]; down 0N vs 15NO [5]
Potra2n15c28480	AT1G12940	nitrate transporter2.5|ATNRT2.5,NRT2.5			up				DEG [10]; High-affinity transporters [18, 19, 20]
Potra2n6c13489	AT5G22380	NAC domain containing protein 90|anac090,NAC090	NAM	up					DEG [10]; nitrate-inducible [21]
Potra2n18c31954	AT1G06330	Heavy metal transport/detoxification superfamily protein		down					DEG [10]; up 0N vs 15NO [5]
Potra2n1c2577	AT1G27730	salt tolerance zinc finger|STZ,ZAT10	C2H2		down				DEG [10]; up 0N vs 15NO [5]
Potra2n10c21314	AT1G68585	hypothetical protein		down					DEG [10]; up 0N vs 15NO [5]
Potra2n3c6807	AT1G80940	Snf1 kinase interactor-like protein		down					DEG [10]; up 0N vs 15NO [5]
Potra2n5c11775	AT2G18050	histone H1-3|HIS1-3		down		down			DEG [10]; up 0N vs 15NO [5]
Potra2n17c31454	AT2G32810	beta galactosidase 9|BGAL9		up					DEG [10]; up 0N vs 15NO [5]
Potra2n13c25005	AT2G38470	WRKY DNA-binding protein 33|ATWRKY33,WRKY33	WRKY	up					DEG [10]; up 0N vs 15NO [5]
Potra2n1c3076	AT3G28450	Leucine-rich repeat protein kinase family protein		up					DEG [10]; up 0N vs 15NO [5]
Potra2n18c33021	AT4G32295	histone acetyltransferase		up					DEG [10]; up 0N vs 15NO [5]
Potra2n2c5233	AT4G33300	ADR1-like 1|ADR1-L1		up					DEG [10]; up 0N vs 15NO [5]
Potra2n9c19275	AT4G34230	cinnamyl alcohol dehydrogenase 5|ATCAD5,CAD-5,CAD5		down					DEG [10]; up 0N vs 15NO [5]
Potra2n6c15263	AT5G47550	Cystatin/monellin superfamily protein		up				020min	DEG [10]; up 0N vs 15NO [5]
Potra2n15c28511	AT5G63030	Thioredoxin superfamily protein		down					DEG [10]; up 0N vs 15NO [5]
Potra2n16c29746	AT3G57400	transmembrane protein		up					DEG [10]; up 15AN vs 1_5AN [5]
Potra2n18c32392	AT2G18700	trehalose phosphatase/synthase 11|ATTPS11,ATTPSB,TPS11		up					DEG [10]; up 15AN vs 15NH [5]
Potra2n2c5596	AT1G77810	Galactosyltransferase family protein		up					DEG [10]; up 15NH vs 1_5AN [5]
Potra2n1c2095	AT1G07530	SCARECROW-like 14|ATGRAS2,GRAS2,SCL14	GRAS	up				045min	DEG [10]; up 15NH vs 1_5AN [5]; nitrate-inducible [21]
Potra2n5c12600	AT1G09070	soybean gene regulated by cold-2|(AT)SRC2,SRC2		up					DEG [10]; up 15NO vs 1_5AN [5]
Potra2n8c18414	AT1G59990	DEA(D/H)-box RNA helicase family protein			up				down [7]
Potra2n8c17679	AT1G68780	RNI-like superfamily protein			down			005min	down [7]
Potra2n10c22200	AT3G21420	2-oxoglutarate (2OG) and Fe(II)-dependent oxygenase superfamily protein			down				down [7]
Potra2n2c5696	AT3G24590	plastidic type i signal peptidase 1|PLSP1		up					down [7]
Potra2n17c31219	AT3G28860	ATP binding cassette subfamily B19|ABCB19,ATABCB19,ATMDR1,ATMDR11,ATPGP19,MDR1,MDR11,PGP19		up					down [7]
Potra2n7c16438	AT4G36520	Chaperone DnaJ-domain superfamily protein		up					down [7]
Potra2n5c10523	AT1G76490	hydroxy methylglutaryl CoA reductase 1|HMG1,HMGR1		up					down [7]; down nit vs amm (phytozome data [27])
Potra2n1c2120	AT2G29260	NAD(P)-binding Rossmann-fold superfamily protein		up	up				down [7]; down nit vs amm (phytozome data [27])
Potra2n1c831	AT4G23500	Pectin lyase-like superfamily protein		up	up				down [7]; down nit vs amm (phytozome data [27])
Potra2n5c10860	AT2G31280	transcription factor bHLH155-like protein|CPUORF7	bHLH	up					down [7]; down nit vs amm (phytozome data [27]); DEG in response to external nitrate concentration in shoots [6]
Potra2n4c9043	AT3G01350	Major facilitator superfamily protein			down				down [7]; down nit vs amm (phytozome data [27]); down 0N vs 15NO [5]
Potra2n6c15133	AT3G56880	VQ motif-containing protein		up					down [7]; up 15NH vs 1_5AN [5]
Potra2n3c6899	AT1G04680	Pectin lyase-like superfamily protein		up					down [7]; up nit vs amm (phytozome data [27])
Potra2n2c6056	AT2G30620	winged-helix DNA-binding transcription factor family protein		down					down [7]; up nit vs amm (phytozome data [27])
Potra2n6c14263	AT5G03555	permease, cytosine/purines, uracil, thiamine, allantoin family protein			down				down [7]; up nit vs amm (phytozome data [27])
Potra2n5c12138	AT4G39710	FK506-binding protein 16-2			down				down [7]; up nit vs amm (phytozome data [27]); DEG in response to external nitrate concentration in shoots [6]
Potra2n10c21505	AT2G01670	nudix hydrolase homolog 17|atnudt17,NUDT17		up					down [7]; up nit vs amm (phytozome data [27]); DEG [5]
Potra2n16c30276	AT2G38090	Duplicated homeodomain-like superfamily protein	MYB	down					down [7]; up nit vs amm (phytozome data [27]); down 0N vs 15NO [5]
Potra2n10c21086	AT3G17210	heat stable protein 1		down					down [7]; up nit vs amm (phytozome data [27]); up 0N vs 15NO [5]
Potra2n81s34501					down				down [7]; up nitrate vs amm nitrate [9]; down nit vs amm (phytozome data [27])
Potra2n8c18085	AT3G22840	Chlorophyll A-B binding family protein|ELIP,ELIP1			up				down [7]; up nitrate vs amm nitrate [9]; up nit vs amm (phytozome data [27])
Potra2n17c31610	AT1G06130	glyoxalase 2-4|GLX2-4		down					down [7]; up nitrate vs amm nitrate [9]; up nit vs amm (phytozome data [27]); DEG in response to external nitrate concentration in shoots [6]
Potra2n3c7486	AT1G12260	NAC 007	NAM	down					down 0N vs 15NO [5]
Potra2n5c11202	AT1G21380	Target of Myb protein 1		up					down 0N vs 15NO [5]
Potra2n12c24607	AT1G28110	serine carboxypeptidase-like 45|SCPL45		down					down 0N vs 15NO [5]
Potra2n6c13626	AT1G65870	Disease resistance-responsive (dirigent-like protein) family protein			down				down 0N vs 15NO [5]
Potra2n6c15076	AT1G68060	microtubule-associated proteins 70-1|ATMAP70-1,MAP70-1		down					down 0N vs 15NO [5]
Potra2n10c21280	AT1G68810	basic helix-loop-helix (bHLH) DNA-binding superfamily protein	bHLH	down					down 0N vs 15NO [5]
Potra2n7c15847	AT1G72210	basic helix-loop-helix (bHLH) DNA-binding superfamily protein	bHLH	down					down 0N vs 15NO [5]
Potra2n562s35967	AT1G73140	trichome birefringence-like protein (DUF828)|TBL31		down					down 0N vs 15NO [5]
Potra2n15c28853	AT1G73640	RAB GTPase homolog A6A|AtRABA6a,RABA6a		up					down 0N vs 15NO [5]
Potra2n2c5687	AT1G77410	beta-galactosidase 16			down				down 0N vs 15NO [5]
Potra2n8c17475	AT2G03480	QUASIMODO2 LIKE 2|QUL2		up					down 0N vs 15NO [5]
Potra2n9c19096	AT2G16250	Leucine-rich repeat protein kinase family protein		up					down 0N vs 15NO [5]
Potra2n1c1276	AT2G44610	Ras-related small GTP-binding family protein|ATRAB6A,ATRABH1B,RAB6,RAB6A		down					down 0N vs 15NO [5]
Potra2n1c1161	AT3G03050	cellulose synthase(cesa)-like D3|ATCSLD3,CSLD3,KJK		up					down 0N vs 15NO [5]
Potra2n10c21656	AT3G05990	Leucine-rich repeat (LRR) family protein		up					down 0N vs 15NO [5]
Potra2n1c2150	AT3G11320	Nucleotide-sugar transporter family protein			down				down 0N vs 15NO [5]
Potra2n1c2437	AT3G51780	BCL-2-associated athanogene 4|ATBAG4,BAG4		down					down 0N vs 15NO [5]
Potra2n15c29208	AT4G01575	serine protease inhibitor, Kazal-type family protein			down				down 0N vs 15NO [5]
Potra2n4c8834	AT4G18425	transmembrane protein, putative (DUF679)			up				down 0N vs 15NO [5]
Potra2n3c7089	AT4G20170	glycosyltransferase family protein (DUF23)		up	down				down 0N vs 15NO [5]
Potra2n1c691	AT4G24130	DUF538 family protein (Protein of unknown function, DUF538)		down					down 0N vs 15NO [5]
Potra2n19c34464	AT4G33420	Peroxidase superfamily protein			down				down 0N vs 15NO [5]
Potra2n5c12058	AT4G39350	cellulose synthase(cesa) A2|ATCESA2,ATH-A,CESA2	bZIP	up					down 0N vs 15NO [5]
Potra2n8c16778	AT5G04840	bZIP protein	bZIP	down				005min	down 0N vs 15NO [5]
Potra2n9c19505	AT5G12250	beta-6 tubulin|TUB6		down					down 0N vs 15NO [5]
Potra2n1c2298	AT5G12840	nuclear factor Y, subunit A1|ATHAP2A,EMB2220,HAP2A,NF-YA1	Hap2/NF	down					down 0N vs 15NO [5]
Potra2n12c23847	AT5G60490	FASCICLIN-like arabinogalactan-protein 12|FLA12			down				down 0N vs 15NO [5]
Potra2n14c26522	AT5G67090	Subtilisin-like serine endopeptidase family protein			up	up			down 0N vs 15NO [5]
Potra2n3c7121				down					down 0N vs 15NO [5]
Potra2n5c12551	AT1G08990	plant glycogenin-like starch initiation protein 5|PGSIP5			up				down 0N vs 15NO [5]; DEG in response to external nitrate concentration in shoots [6]
Potra2n2c5705	AT1G77330	2-oxoglutarate (2OG) and Fe(II)-dependent oxygenase superfamily protein			down	up			down 0N vs 15NO [5]; DEG in response to external nitrate concentration in shoots [6]
Potra2n12c23929	AT3G22370	alternative oxidase 1A|AOX1A,ATAOX1A		up					down 0N vs 15NO [5]; DEG in response to external nitrate concentration in shoots [6]
Potra2n9c18949	AT5G09220	amino acid permease 2|AAP2			down	down	up		down 0N vs 15NO [5]; DEG in response to external nitrate concentration in shoots [6]
Potra2n7c16541	AT5G65530	Protein kinase superfamily protein			down			015min	down 0N vs 15NO [5]; DEG in response to external nitrate concentration in shoots [6]
Potra2n1c2826	AT3G02040	senescence-related gene 3|SRG3		down	up	down			Down at ; up nit vs amm (phytozome data [27])
Potra2n2c4681					up				Down at ; up nit vs amm (phytozome data [27]); up 0N vs 15NO [5]
Potra2n5c11185	AT1G21450	SCARECROW-like 1|SCL1	GRAS	up					down High N vs Adequate N [8]
Potra2n9c20050	AT5G60800	Heavy metal transport/detoxification superfamily protein		up					down High N vs Adequate N [8]
Potra2n18c32199	AT5G20410	monogalactosyldiacylglycerol synthase 2|ATMGD2,MGD2			up				down High N vs Adequate N [8]; down 0N vs 15NO [5]
Potra2n2c6308	AT5G42210	Major facilitator superfamily protein			up				down High N vs Adequate N [8]; down 0N vs 15NO [5]
Potra2n16c29840	AT3G52360	transmembrane protein			up				down High N vs Adequate N [8]; up nit vs amm (phytozome data [27])
Potra2n548s35915	AT5G48150	GRAS family transcription factor	GRAS	up					down High N vs Adequate N [8]; up nit vs amm (phytozome data [27]); DEG [5]
Potra2n11c22567	AT1G76520	Auxin efflux carrier family protein		up					down High N vs Adequate N [8]; up nit vs amm (phytozome data [27]); DEG [5]; DEG in response to external nitrate concentration in shoots [6]
Potra2n4c9930	AT2G21180	transmembrane protein		down					down High N vs Adequate N [8]; up nit vs amm (phytozome data [27]); down 0N vs 15NO [5]
Potra2n14c26690	AT1G02120	GRAM domain family protein		up					down nit vs amm (phytozome data [27])
Potra2n14c26705	AT1G02130	RAS 5|ARA-5,ARA5,ATRAB1B,ATRABD2A,RA-5,RABD2A		down					down nit vs amm (phytozome data [27])
Potra2n3c7161	AT1G02800	cellulase 2|ATCEL2,CEL2			down				down nit vs amm (phytozome data [27])
Potra2n6c14271	AT1G03910	cactus-binding carboxy-terminal, cactin		up					down nit vs amm (phytozome data [27])
Potra2n2c6111	AT1G04430	S-adenosyl-L-methionine-dependent methyltransferases superfamily protein		up					down nit vs amm (phytozome data [27])
Potra2n11c23190	AT1G06410	trehalose-phosphatase/synthase 7		up					down nit vs amm (phytozome data [27])
Potra2n14c26598	AT1G06870	Peptidase S24/S26A/S26B/S26C family protein		up					down nit vs amm (phytozome data [27])
Potra2n16c29989	AT1G07710	Ankyrin repeat family protein		up					down nit vs amm (phytozome data [27])
Potra2n9c18863	AT1G08290	WIP domain protein 3|WIP3	C2H2	up					down nit vs amm (phytozome data [27])
Potra2n13c24932	AT1G09575	calcium uniporter-like protein (DUF607)		up					down nit vs amm (phytozome data [27])
Potra2n8c18360	AT1G10740	alpha/beta-Hydrolases superfamily protein		up					down nit vs amm (phytozome data [27])
Potra2n4c8529	AT1G11740	ankyrin repeat family protein		down					down nit vs amm (phytozome data [27])
Potra2n3c7463	AT1G12360	Sec1/munc18-like (SM) proteins superfamily|KEU		up					down nit vs amm (phytozome data [27])
Potra2n8c17898	AT1G14740	class I heat shock protein, putative (DUF1423)	PHD	up					down nit vs amm (phytozome data [27])
Potra2n1c3307	AT1G17110	ubiquitin-specific protease 15		up	up			045min	down nit vs amm (phytozome data [27])
Potra2n6c14081	AT1G17370	oligouridylate binding protein 1B|UBP1B		down					down nit vs amm (phytozome data [27])
Potra2n15c28607	AT1G19000	Homeodomain-like superfamily protein	Homeodomain	up					down nit vs amm (phytozome data [27])
Potra2n12c24342	AT1G19000	Homeodomain-like superfamily protein	Homeodomain	up					down nit vs amm (phytozome data [27])
Potra2n5c10653	AT1G20110	RING/FYVE/PHD zinc finger superfamily protein	PHD	up					down nit vs amm (phytozome data [27])
Potra2n5c10502	AT1G21000	PLATZ transcription factor family protein	Znf	up	up				down nit vs amm (phytozome data [27])
Potra2n2c5711	AT1G21580	Zinc finger C-x8-C-x5-C-x3-H type family protein	C3H	up					down nit vs amm (phytozome data [27])
Potra2n8c17861	AT1G23260	MMS ZWEI homologue 1|MMZ1,UEV1A		down					down nit vs amm (phytozome data [27])
Potra2n4c8995	AT1G29690	MAC/Perforin domain-containing protein|CAD1		up					down nit vs amm (phytozome data [27])
Potra2n1c3167	AT1G30320	Remorin family protein		up	up	down			down nit vs amm (phytozome data [27])
Potra2n1c661	AT1G31320	LOB domain-containing protein 4|LBD4	AS2	down				090min	down nit vs amm (phytozome data [27])
Potra2n3c7587	AT1G32350	alternative oxidase 1D		up					down nit vs amm (phytozome data [27])
Potra2n3c7757	AT1G32740	SBP (S-ribonuclease binding protein) family protein	C2H2	up					down nit vs amm (phytozome data [27])
Potra2n2c5867	AT1G34190	NAC domain containing protein 17|anac017,NAC017	NAM	up				090min	down nit vs amm (phytozome data [27])
Potra2n5c11066	AT1G34190	NAC domain containing protein 17|anac017,NAC017	NAM	up					down nit vs amm (phytozome data [27])
Potra2n5c10554	AT1G42480	TLR4 regulator/MIR-interacting MSAP protein		down					down nit vs amm (phytozome data [27])
Potra2n2c5682	AT1G44130	Eukaryotic aspartyl protease family protein		up					down nit vs amm (phytozome data [27])
Potra2n9c19687	AT1G50460	hexokinase-like 1|ATHKL1,HKL1		up					down nit vs amm (phytozome data [27])
Potra2n3c6620	AT1G51200	A20/AN1-like zinc finger family protein	A20	down					down nit vs amm (phytozome data [27])
Potra2n11c22763	AT1G52870	Peroxisomal membrane 22 kDa (Mpv17/PMP22) family protein		up					down nit vs amm (phytozome data [27])
Potra2n13c25171	AT1G53050	Protein kinase superfamily protein		up					down nit vs amm (phytozome data [27])
Potra2n1c3402	AT1G53320	tubby like protein 7|AtTLP7,TLP7	TUBBY	up					down nit vs amm (phytozome data [27])
Potra2n8c17356	AT1G54320	LEM3 (ligand-effect modulator 3) family protein / CDC50 family protein		up					down nit vs amm (phytozome data [27])
Potra2n5c12361	AT1G54460	TPX2 (targeting protein for Xklp2) protein family		down					down nit vs amm (phytozome data [27])
Potra2n13c26245	AT1G56560	Plant neutral invertase family protein		up					down nit vs amm (phytozome data [27])
Potra2n6c14818	AT1G60430	actin-related protein C3|ARPC3		down					down nit vs amm (phytozome data [27])
Potra2n10c21938	AT1G67600	Acid phosphatase/vanadium-dependent haloperoxidase-related protein			up				down nit vs amm (phytozome data [27])
Potra2n8c17748	AT1G68300	Adenine nucleotide alpha hydrolases-like superfamily protein			up				down nit vs amm (phytozome data [27])
Potra2n8c17640	AT1G68710	ATPase E1-E2 type family protein / haloacid dehalogenase-like hydrolase family protein		up					down nit vs amm (phytozome data [27])
Potra2n7c15922	AT1G78020	senescence-associated family protein, putative (DUF581)		down					down nit vs amm (phytozome data [27])
Potra2n2c5513	AT1G78280	transferases, transferring glycosyl groups	JmjC	up					down nit vs amm (phytozome data [27])
Potra2n288s35210	AT1G79750	NADP-malic enzyme 4|ATNADP-ME4,NADP-ME4		up					down nit vs amm (phytozome data [27])
Potra2n10c21463	AT2G01480	O-fucosyltransferase family protein		up					down nit vs amm (phytozome data [27])
Potra2n4c10455	AT2G02390	glutathione S-transferase zeta 1		down					down nit vs amm (phytozome data [27])
Potra2n15c28766	AT2G03800	D-aminoacyl-tRNA deacylase			up				down nit vs amm (phytozome data [27])
Potra2n2c4478	AT2G04520	Nucleic acid-binding, OB-fold-like protein		up					down nit vs amm (phytozome data [27])
Potra2n9c19289	AT2G15220	Plant basic secretory protein (BSP) family protein		up					down nit vs amm (phytozome data [27])
Potra2n3c7616	AT2G15480	UDP-glucosyl transferase 73B5|UGT73B5		up					down nit vs amm (phytozome data [27])
Potra2n6c13778	AT2G18660	plant natriuretic peptide A|PNP-A		up					down nit vs amm (phytozome data [27])
Potra2n1c70	AT2G20142	Toll-Interleukin-Resistance (TIR) domain family protein		up					down nit vs amm (phytozome data [27])
Potra2n4c8716	AT2G20840	Secretory carrier membrane protein (SCAMP) family protein		down					down nit vs amm (phytozome data [27])
Potra2n4c9935	AT2G21160	Translocon-associated protein (TRAP), alpha subunit		up					down nit vs amm (phytozome data [27])
Potra2n5c10782	AT2G21520	Sec14p-like phosphatidylinositol transfer family protein		up					down nit vs amm (phytozome data [27])
Potra2n4c9590	AT2G22170	Lipase/lipooxygenase, PLAT/LH2 family protein			up				down nit vs amm (phytozome data [27])
Potra2n6c13745	AT2G24030	zinc ion binding / nucleic acid binding protein	C2H2	up					down nit vs amm (phytozome data [27])
Potra2n4c10074	AT2G27690	cytochrome P450, family 94, subfamily C, polypeptide 1|CYP94C1			up	up			down nit vs amm (phytozome data [27])
Potra2n9c18821	AT2G27810	nucleobase-ascorbate transporter 12		up					down nit vs amm (phytozome data [27])
Potra2n1c2435	AT2G30080	ZIP metal ion transporter family|ATZIP6,ZIP6		up					down nit vs amm (phytozome data [27])
Potra2n1c2449	AT2G30105	LRR/ubiquitin-like domain protein		up					down nit vs amm (phytozome data [27])
Potra2n10c21700	AT2G32030	Acyl-CoA N-acyltransferases (NAT) superfamily protein		up				010min	down nit vs amm (phytozome data [27])
Potra2n14c27648	AT2G32520	alpha/beta-Hydrolases superfamily protein		down					down nit vs amm (phytozome data [27])
Potra2n5c11937	AT2G34750	RNA polymerase I specific transcription initiation factor RRN3 protein		up				090min	down nit vs amm (phytozome data [27])
Potra2n1c1219	AT2G35230	VQ motif-containing protein		up					down nit vs amm (phytozome data [27])
Potra2n6c14501	AT2G38000	chaperone protein dnaJ-like protein		up					down nit vs amm (phytozome data [27])
Potra2n6c14735	AT2G38670	phosphorylethanolamine cytidylyltransferase 1|PECT1		up					down nit vs amm (phytozome data [27])
Potra2n8c17117	AT2G39650	cruciferin (DUF506)		up					down nit vs amm (phytozome data [27])
Potra2n8c17149	AT2G39760	BTB/POZ/MATH-domains containing protein	BTB	up					down nit vs amm (phytozome data [27])
Potra2n10c20748	AT2G40095	Alpha/beta hydrolase related protein		up					down nit vs amm (phytozome data [27])
Potra2n10c20744	AT2G40110	Yippee family putative zinc-binding protein		down					down nit vs amm (phytozome data [27])
Potra2n3c6646	AT2G41430	dehydration-induced protein (ERD15)|CID1,ERD15,LSR1		down					down nit vs amm (phytozome data [27])
Potra2n3c6636	AT2G41540	6-phosphogluconate dehydrogenase family protein|GPDHC1		up					down nit vs amm (phytozome data [27])
Potra2n14c27122	AT2G46500	phosphoinositide 4-kinase gamma 4|ATPI4K GAMMA 4,PI4K GAMMA 4,UBDK GAMMA 4		up					down nit vs amm (phytozome data [27])
Potra2n14c27520	AT3G02065	P-loop containing nucleoside triphosphate hydrolases superfamily protein		up					down nit vs amm (phytozome data [27])
Potra2n13c26024	AT3G05000	Transport protein particle (TRAPP) component		down					down nit vs amm (phytozome data [27])
Potra2n5c12663	AT3G06720	importin alpha isoform 1|AIMP ALPHA,AT-IMP,ATKAP ALPHA,IMPA-1,IMPA1		up					down nit vs amm (phytozome data [27])
Potra2n12c24426	AT3G11330	plant intracellular ras group-related LRR 9|PIRL9		up				None	down nit vs amm (phytozome data [27])
Potra2n16c29850	AT3G11750	Dihydroneopterin aldolase|FOLB1		down					down nit vs amm (phytozome data [27])
Potra2n16c29857	AT3G11780	MD-2-related lipid recognition domain-containing protein / ML domain-containing protein		down					down nit vs amm (phytozome data [27])
Potra2n16c29645	AT3G12120	fatty acid desaturase 2|FAD2		up					down nit vs amm (phytozome data [27])
Potra2n8c17042	AT3G12360	Ankyrin repeat family protein		up					down nit vs amm (phytozome data [27])
Potra2n8c17097	AT3G12570	FYD|FYD		up					down nit vs amm (phytozome data [27])
Potra2n1c2010	AT3G13510	carboxyl-terminal peptidase, putative (DUF239)		up					down nit vs amm (phytozome data [27])
Potra2n1c102	AT3G13670	Protein kinase family protein		up					down nit vs amm (phytozome data [27])
Potra2n1c3480	AT3G15290	3-hydroxyacyl-CoA dehydrogenase family protein		down					down nit vs amm (phytozome data [27])
Potra2n1c1565	AT3G15540	indole-3-acetic acid inducible 19|IAA19,MSG2	AUX	down					down nit vs amm (phytozome data [27])
Potra2n8c18536	AT3G16510	Calcium-dependent lipid-binding (CaLB domain) family protein			down	down			down nit vs amm (phytozome data [27])
Potra2n5c12618	AT3G16640	translationally controlled tumor protein|TCTP		up					down nit vs amm (phytozome data [27])
Potra2n12c24118	AT3G17980	Calcium-dependent lipid-binding (CaLB domain) family protein		up					down nit vs amm (phytozome data [27])
Potra2n2c4453	AT3G21630	chitin elicitor receptor kinase 1|CERK1,LYSM RLK1		up					down nit vs amm (phytozome data [27])
Potra2n10c21796	AT3G23150	Signal transduction histidine kinase, hybrid-type, ethylene sensor	RR	up					down nit vs amm (phytozome data [27])
Potra2n2c4292	AT3G23730	xyloglucan endotransglucosylase/hydrolase 16|XTH16		down					down nit vs amm (phytozome data [27])
Potra2n10c21892	AT3G23920	beta-amylase 1|BAM1,BMY7,TR-BAMY		up					down nit vs amm (phytozome data [27])
Potra2n3c6877	AT3G24170	glutathione-disulfide reductase|ATGR1,GR1		up					down nit vs amm (phytozome data [27])
Potra2n8c18295	AT3G27320	alpha/beta-Hydrolases superfamily protein		up					down nit vs amm (phytozome data [27])
Potra2n1c2964	AT3G27325	hydrolases, acting on ester bond		up					down nit vs amm (phytozome data [27])
Potra2n17c31163	AT3G29075	glycine-rich protein		up					down nit vs amm (phytozome data [27])
Potra2n12c24306	AT3G47730	ATP-binding cassette A2|ABCA2,ATATH1,ATH1		up					down nit vs amm (phytozome data [27])
Potra2n8c18285	AT3G48140	B12D protein		up		down			down nit vs amm (phytozome data [27])
Potra2n2c5360	AT3G49780	phytosulfokine 4 precursor|ATPSK3 (FORMER SYMBOL),ATPSK4,PSK4		up					down nit vs amm (phytozome data [27])
Potra2n9c19367	AT3G49780	phytosulfokine 4 precursor|ATPSK3 (FORMER SYMBOL),ATPSK4,PSK4		up					down nit vs amm (phytozome data [27])
Potra2n5c11738	AT3G50950	HOPZ-ACTIVATED RESISTANCE 1|ZAR1		up					down nit vs amm (phytozome data [27])
Potra2n7c16479	AT3G51030	thioredoxin H-type 1|ATTRX H1,ATTRX1,TRX1		down					down nit vs amm (phytozome data [27])
Potra2n5c11767	AT3G51120	zinc finger CCCH domain-containing protein 44	SWIB	up					down nit vs amm (phytozome data [27])
Potra2n1c3843	AT3G51510	transmembrane protein		down					down nit vs amm (phytozome data [27])
Potra2n16c30230	AT3G54000	TIP41-like protein		up					down nit vs amm (phytozome data [27])
Potra2n16c30248	AT3G54040	PAR1 protein		up					down nit vs amm (phytozome data [27])
Potra2n10c20785	AT3G56040	UDP-glucose pyrophosphorylase 3|UGP3			up	down			down nit vs amm (phytozome data [27])
Potra2n16c29443	AT3G56490	HIS triad family protein 3|HINT1,HIT3		down					down nit vs amm (phytozome data [27])
Potra2n16c29776	AT3G58040	seven in absentia of Arabidopsis 2|SINAT2	C2H2	up					down nit vs amm (phytozome data [27])
Potra2n2c4359	AT3G59310	solute carrier family 35 protein (DUF914)		up					down nit vs amm (phytozome data [27])
Potra2n14c26841	AT3G60750	Transketolase		up					down nit vs amm (phytozome data [27])
Potra2n14c27078	AT3G61600	POZ/BTB containin G-protein 1|ATPOB1,POB1	BTB	up					down nit vs amm (phytozome data [27])
Potra2n1c215	AT3G61790	Protein with RING/U-box and TRAF-like domain	C2H2	up					down nit vs amm (phytozome data [27])
Potra2n2c4551	AT4G02425	LYR motif protein			up				down nit vs amm (phytozome data [27])
Potra2n13c25086	AT4G03415	Protein phosphatase 2C family protein		up					down nit vs amm (phytozome data [27])
Potra2n11c23660	AT4G04720	calcium-dependent protein kinase 21|CPK21		up					down nit vs amm (phytozome data [27])
Potra2n584s36054	AT4G11260	phosphatase-like protein|ATSGT1B,EDM1,ETA3,RPR1,SGT1B		up					down nit vs amm (phytozome data [27])
Potra2n2c4985	AT4G11610	C2 calcium/lipid-binding plant phosphoribosyltransferase family protein			down				down nit vs amm (phytozome data [27])
Potra2n17c31424	AT4G14010	ralf-like 32|RALFL32		up					down nit vs amm (phytozome data [27])
Potra2n10c21811	AT4G14410	basic helix-loop-helix (bHLH) DNA-binding superfamily protein|bHLH104	bHLH	up				010min	down nit vs amm (phytozome data [27])
Potra2n10c21741	AT4G14640	calmodulin 8|CAM8		up					down nit vs amm (phytozome data [27])
Potra2n1c1335	AT4G16830	Hyaluronan / mRNA binding family		up					down nit vs amm (phytozome data [27])
Potra2n1c1345	AT4G17500	ethylene responsive element binding factor 1|ATERF-1,ERF-1	AP2	up					down nit vs amm (phytozome data [27])
Potra2n1c1208	AT4G17900	PLATZ transcription factor family protein	Znf	up					down nit vs amm (phytozome data [27])
Potra2n4c9000	AT4G18950	Integrin-linked protein kinase family		up				030min	down nit vs amm (phytozome data [27])
Potra2n4c10480	AT4G19210	RNAse l inhibitor protein 2|ATRLI2,RLI2		up					down nit vs amm (phytozome data [27])
Potra2n5c11188	AT4G19950	polyadenylate-binding protein 1-B-binding protein		up					down nit vs amm (phytozome data [27])
Potra2n13c25053	AT4G21450	PapD-like superfamily protein		down					down nit vs amm (phytozome data [27])
Potra2n4c8420	AT4G22330	Alkaline phytoceramidase (aPHC)|ATCES1		up					down nit vs amm (phytozome data [27])
Potra2n3c7401	AT4G23030	MATE efflux family protein		up					down nit vs amm (phytozome data [27])
Potra2n12c24466	AT4G24740	LAMMER-type protein kinase AFC2		up					down nit vs amm (phytozome data [27])
Potra2n14c26794	AT4G25225	transmembrane protein		up					down nit vs amm (phytozome data [27])
Potra2n1c3542	AT4G27390	transmembrane protein		up					down nit vs amm (phytozome data [27])
Potra2n6c14633	AT4G28400	Protein phosphatase 2C family protein		up					down nit vs amm (phytozome data [27])
Potra2n18c32157	AT4G28640	indole-3-acetic acid inducible 11|IAA11	AUX	up		up			down nit vs amm (phytozome data [27])
Potra2n18c32081	AT4G29900	autoinhibited Ca(2+)-ATPase 10		up					down nit vs amm (phytozome data [27])
Potra2n6c13853	AT4G30210	P450 reductase 2|AR2,ATR2		up					down nit vs amm (phytozome data [27])
Potra2n18c32322	AT4G30600	signal recognition particle receptor alpha subunit family protein		up					down nit vs amm (phytozome data [27])
Potra2n6c12957	AT4G31860	Protein phosphatase 2C family protein		up	up				down nit vs amm (phytozome data [27])
Potra2n14c26591	AT4G33300	ADR1-like 1|ADR1-L1		up					down nit vs amm (phytozome data [27])
Potra2n9c19249	AT4G34100	RING/U-box superfamily protein	C2H2	up					down nit vs amm (phytozome data [27])
Potra2n9c19250	AT4G34110	poly(A) binding protein 2|ATPAB2,PAB2,PABP2		up					down nit vs amm (phytozome data [27])
Potra2n7c16205	AT4G37300	maternal effect embryo arrest 59|MEE59		down				045min	down nit vs amm (phytozome data [27])
Potra2n4c9962	AT4G38680	glycine rich protein 2|ATCSP2,CSDP2,CSP2,GRP2		up					down nit vs amm (phytozome data [27])
Potra2n9c18979	AT4G38710	glycine-rich protein		up					down nit vs amm (phytozome data [27])
Potra2n5c12073	AT4G39410	WRKY DNA-binding protein 13|ATWRKY13,WRKY13	WRKY	up					down nit vs amm (phytozome data [27])
Potra2n16c29998	AT5G02640	hypothetical protein		down					down nit vs amm (phytozome data [27])
Potra2n12c24450	AT5G03340	ATPase, AAA-type, CDC48 protein		up					down nit vs amm (phytozome data [27])
Potra2n8c16935	AT5G04250	Cysteine proteinases superfamily protein			up				down nit vs amm (phytozome data [27])
Potra2n16c30133	AT5G08110	UBQ, helicase-c and DEAD-like helicase domain-containing protein		up					down nit vs amm (phytozome data [27])
Potra2n7c15864	AT5G10350	RNA-binding (RRM/RBD/RNP motifs) family protein		up	up				down nit vs amm (phytozome data [27])
Potra2n6c13294	AT5G11850	Protein kinase superfamily protein		up					down nit vs amm (phytozome data [27])
Potra2n3c6990	AT5G13180	NAC domain containing protein 83|ANAC083,NAC083,VNI2	NAM	up					down nit vs amm (phytozome data [27])
Potra2n17c30920	AT5G16120	alpha/beta-Hydrolases superfamily protein		up					down nit vs amm (phytozome data [27])
Potra2n17c30664	AT5G17310	UDP-glucose pyrophosphorylase 2|AtUGP2,UGP2			down				down nit vs amm (phytozome data [27])
Potra2n10c22148	AT5G19040	isopentenyltransferase 5|ATIPT5,IPT5			up				down nit vs amm (phytozome data [27])
Potra2n18c32663	AT5G20070	nudix hydrolase homolog 19|ATNUDT19,ATNUDX19,NUDX19		up					down nit vs amm (phytozome data [27])
Potra2n18c32215	AT5G20350	Ankyrin repeat family protein with DHHC zinc finger domain-containing protein|TIP1		up					down nit vs amm (phytozome data [27])
Potra2n6c13410	AT5G20885	RING/U-box superfamily protein	C2H2	up				010min	down nit vs amm (phytozome data [27])
Potra2n9c18790	AT5G21990	Tetratricopeptide repeat (TPR)-like superfamily protein		up					down nit vs amm (phytozome data [27])
Potra2n1c1902	AT5G22360	vesicle-associated membrane protein 714|ATVAMP714,VAMP714		up				None	down nit vs amm (phytozome data [27])
Potra2n4c9135	AT5G24010	Protein kinase superfamily protein			down				down nit vs amm (phytozome data [27])
Potra2n18c32593	AT5G24105	arabinogalactan protein 41|AGP41		up					down nit vs amm (phytozome data [27])
Potra2n6c14800	AT5G35200	ENTH/ANTH/VHS superfamily protein		up					down nit vs amm (phytozome data [27])
Potra2n2c4494	AT5G35735	Auxin-responsive family protein		up	up	down			down nit vs amm (phytozome data [27])
Potra2n13c25725	AT5G39890	2-aminoethanethiol dioxygenase, putative (DUF1637)		up					down nit vs amm (phytozome data [27])
Potra2n4c9996	AT5G42190	E3 ubiquitin ligase SCF complex subunit SKP1/ASK1 family protein|ASK2,SKP1B		up				060min	down nit vs amm (phytozome data [27])
Potra2n10c20425	AT5G42300	ubiquitin-like protein 5|UBL5		down					down nit vs amm (phytozome data [27])
Potra2n5c10585	AT5G42320	Zn-dependent exopeptidases superfamily protein		up					down nit vs amm (phytozome data [27])
Potra2n2c5915	AT5G45110	NPR1-like protein 3	ABTB		up				down nit vs amm (phytozome data [27])
Potra2n1c1198	AT5G46840	RNA-binding (RRM/RBD/RNP motifs) family protein		up				045min	down nit vs amm (phytozome data [27])
Potra2n3c7067	AT5G47900	heparan-alpha-glucosaminide N-acetyltransferase-like protein (DUF1624)		up					down nit vs amm (phytozome data [27])
Potra2n3c7061	AT5G47910	respiratory burst oxidase homologue D|ATRBOHD,RBOHD		up					down nit vs amm (phytozome data [27])
Potra2n14c27804	AT5G48335	hypothetical protein		down					down nit vs amm (phytozome data [27])
Potra2n3c7156	AT5G48655	RING/U-box superfamily protein	C2H2	up					down nit vs amm (phytozome data [27])
Potra2n10c21118	AT5G49520	WRKY DNA-binding protein 48|ATWRKY48,WRKY48	WRKY	up					down nit vs amm (phytozome data [27])
Potra2n7c16374	AT5G49530	SIN-like family protein		up					down nit vs amm (phytozome data [27])
Potra2n12c24798	AT5G51760	Protein phosphatase 2C family protein|AHG1			down				down nit vs amm (phytozome data [27])
Potra2n12c24847	AT5G51940	RNA polymerase Rpb6|NRPB6A,NRPD6A,NRPE6A		down					down nit vs amm (phytozome data [27])
Potra2n15c27983	AT5G52390	PAR1 protein		up		down			down nit vs amm (phytozome data [27])
Potra2n3c7330	AT5G52430	hydroxyproline-rich glycoprotein family protein			up				down nit vs amm (phytozome data [27])
Potra2n1c853	AT5G52430	hydroxyproline-rich glycoprotein family protein		up					down nit vs amm (phytozome data [27])
Potra2n12c23938	AT5G53180	polypyrimidine tract-binding protein 2		up					down nit vs amm (phytozome data [27])
Potra2n1c3481	AT5G53870	early nodulin-like protein 1		up					down nit vs amm (phytozome data [27])
Potra2n11c22367	AT5G56260	Ribonuclease E inhibitor RraA/Dimethylmenaquinone methyltransferase		down					down nit vs amm (phytozome data [27])
Potra2n18c32310	AT5G57990	ubiquitin-specific protease 23|UBP23	C2H2	up					down nit vs amm (phytozome data [27])
Potra2n9c19776	AT5G58960	glucose-6-phosphate isomerase, putative (DUF641)|GIL1			down				down nit vs amm (phytozome data [27])
Potra2n4c10257	AT5G60410	DNA-binding protein with MIZ/SP-RING zinc finger, PHD-finger and SAP domain-containing protein|ATSIZ1,SIZ1	PHD	up					down nit vs amm (phytozome data [27])
Potra2n15c28672	AT5G61390	Polynucleotidyl transferase, ribonuclease H-like superfamily protein		up					down nit vs amm (phytozome data [27])
Potra2n4c10463	AT5G61510	GroES-like zinc-binding alcohol dehydrogenase family protein		up					down nit vs amm (phytozome data [27])
Potra2n12c24671	AT5G61670	orange protein		down					down nit vs amm (phytozome data [27])
Potra2n12c24371	AT5G62575	succinate dehydrogenase subunit		down					down nit vs amm (phytozome data [27])
Potra2n7c15819	AT5G63840	Glycosyl hydrolases family 31 protein		up					down nit vs amm (phytozome data [27])
Potra2n17c31595	AT5G64390	RNA-binding KH domain-containing protein|HEN4		up					down nit vs amm (phytozome data [27])
Potra2n5c11911	AT5G66010	RNA-binding (RRM/RBD/RNP motifs) family protein		up					down nit vs amm (phytozome data [27])
Potra2n5c11803	AT5G66210	calcium-dependent protein kinase 28|CPK28		up					down nit vs amm (phytozome data [27])
Potra2n14c26589	AT5G66850	mitogen-activated protein kinase kinase kinase 5|MAPKKK5			up				down nit vs amm (phytozome data [27])
Potra2n6c14432					down				down nit vs amm (phytozome data [27])
Potra2n2c4050				up	up				down nit vs amm (phytozome data [27])
Potra2n1c3374					up				down nit vs amm (phytozome data [27])
Potra2n17c31184				down					down nit vs amm (phytozome data [27])
Potra2n11c22560				down					down nit vs amm (phytozome data [27])
Potra2n6c14728				down					down nit vs amm (phytozome data [27])
Potra2n3c7241				up					down nit vs amm (phytozome data [27])
Potra2n16c30286	AT1G03430	histidine-containing phosphotransfer factor 5|AHP5		down					down nit vs amm (phytozome data [27]); DEG in response to external nitrate concentration in shoots [6]
Potra2n8c16846	AT1G08230	Transmembrane amino acid transporter family protein			up				down nit vs amm (phytozome data [27]); DEG in response to external nitrate concentration in shoots [6]
Potra2n7c16473	AT1G75440	ubiquitin-conjugating enzyme 16|UBC16		down					down nit vs amm (phytozome data [27]); DEG in response to external nitrate concentration in shoots [6]
Potra2n6c13552	AT2G35940	BEL1-like homeodomain 1|BLH1,EDA29	Homobox	up					down nit vs amm (phytozome data [27]); DEG in response to external nitrate concentration in shoots [6]
Potra2n16c29729	AT2G41850	polygalacturonase ADPG2-like protein|ADPG2,PGAZAT			up	up			down nit vs amm (phytozome data [27]); DEG in response to external nitrate concentration in shoots [6]
Potra2n4c9349	AT3G02550	LOB domain-containing protein 41|LBD41	AS2	up	up				down nit vs amm (phytozome data [27]); DEG in response to external nitrate concentration in shoots [6]
Potra2n14c27135	AT4G00950	hypothetical protein (DUF688)|MEE47		up	up				down nit vs amm (phytozome data [27]); DEG in response to external nitrate concentration in shoots [6]
Potra2n3c7703	AT4G17960	phospholipid hydroperoxide glutathione peroxidase		down					down nit vs amm (phytozome data [27]); DEG in response to external nitrate concentration in shoots [6]
Potra2n11c22391	AT5G23810	amino acid permease 7|AAP7			down				down nit vs amm (phytozome data [27]); DEG in response to external nitrate concentration in shoots [6]
Potra2n1c3570	AT5G54470	B-box type zinc finger family protein	Znf	up					down nit vs amm (phytozome data [27]); DEG in response to external nitrate concentration in shoots [6]
Potra2n6c14220	AT5G03380	Heavy metal transport/detoxification superfamily protein		up				010min	down nit vs amm (phytozome data [27]); CDF1, HHO5 target [3]
Potra2n1c19	AT1G55500	evolutionarily conserved C-terminal region 4|ECT4		up				None	down nit vs amm (phytozome data [27]); CDF1, PHL1 target [3]
Potra2n4c8787	AT4G20980	Eukaryotic translation initiation factor 3 subunit 7 (eIF-3)		up				090min	down nit vs amm (phytozome data [27]); CRF4 target [3]
Potra2n4c9942	AT4G38710	glycine-rich protein		up				045min	down nit vs amm (phytozome data [27]); CRF4 target [3]
Potra2n1c3196	AT3G13110	serine acetyltransferase 2;2|ATSERAT2;2,SAT-1,SAT-A,SAT-M,SAT3,SERAT2;2		up				020min	down nit vs amm (phytozome data [27]); CRF4, CDF1, SNZ, HHO5, HHO6, PHL1 target [3]
Potra2n1c322	AT1G16170	ephrin-A3 protein		up	up			020min	down nit vs amm (phytozome data [27]); DEG [5]
Potra2n2c6369	AT1G42470	Patched family protein		down					down nit vs amm (phytozome data [27]); DEG [5]
Potra2n5c11117	AT1G43170	ribosomal protein 1|ARP1,emb2207,RP1,RPL3A		up					down nit vs amm (phytozome data [27]); DEG [5]
Potra2n1c366	AT1G80840	WRKY DNA-binding protein 40|ATWRKY40,WRKY40	WRKY	up	up				down nit vs amm (phytozome data [27]); DEG [5]
Potra2n6c14860	AT2G12646	PLATZ transcription factor family protein	PLATZ		up				down nit vs amm (phytozome data [27]); DEG [5]
Potra2n6c13170	AT2G25737	Sulfite exporter TauE/SafE family protein			up	up			down nit vs amm (phytozome data [27]); DEG [5]
Potra2n2c6093	AT2G31200	actin depolymerizing factor 6|ADF6,ATADF6		down					down nit vs amm (phytozome data [27]); DEG [5]
Potra2n14c26946	AT2G45760	BON association protein 2|BAL,BAP2		down					down nit vs amm (phytozome data [27]); DEG [5]
Potra2n16c29552	AT3G57040	response regulator 9	RR	up	up			020min	down nit vs amm (phytozome data [27]); DEG [5]
Potra2n11c23330	AT3G58610	ketol-acid reductoisomerase		up					down nit vs amm (phytozome data [27]); DEG [5]
Potra2n2c5153	AT4G09320	nucleoside diphosphate kinase|NDPK1		up					down nit vs amm (phytozome data [27]); DEG [5]
Potra2n5c11091	AT4G09760	Protein kinase superfamily protein			up				down nit vs amm (phytozome data [27]); DEG [5]
Potra2n3c7827	AT4G17370	Oxidoreductase family protein		down					down nit vs amm (phytozome data [27]); DEG [5]
Potra2n17c31812	AT4G28430	Reticulon family protein			up	up			down nit vs amm (phytozome data [27]); DEG [5]
Potra2n203s34956	AT4G37180	Homeodomain-like superfamily protein	Homeodomain	up					down nit vs amm (phytozome data [27]); DEG [5]
Potra2n6c13176	AT5G11520	aspartate aminotransferase 3|ASP3,YLS4		up					down nit vs amm (phytozome data [27]); DEG [5]
Potra2n19c33460	AT5G39740	ribosomal protein L5 B|OLI7,RPL5B		up				090min	down nit vs amm (phytozome data [27]); DEG [5]
Potra2n17c31530	AT5G64290	dicarboxylate transport 2.1|DCT,DIT2.1		up	up				down nit vs amm (phytozome data [27]); DEG [5]
Potra2n6c13011				up					down nit vs amm (phytozome data [27]); DEG [5]
Potra2n15c28643	AT5G62720	Integral membrane HPP family protein		up	up			010min	down nit vs amm (phytozome data [27]); DEG [5]; DEG in response to external nitrate concentration in shoots [6]
Potra2n9c19330	AT3G49940	LOB domain-containing protein 38|LBD38	AS2	up	up				down nit vs amm (phytozome data [27]); DEG [5]; DEG in response to external nitrate concentration in shoots [6]; nitrate-inducible [20, 21]
Potra2n3c7064	AT3G16560	Protein phosphatase 2C family protein		up	up			020min	down nit vs amm (phytozome data [27]); DEG [5]; CRF4 target [3]
Potra2n1c494	AT5G13110	glucose-6-phosphate dehydrogenase 2|G6PD2		up	up			010min	down nit vs amm (phytozome data [27]); DEG [5]; First target of systemic signals is N uptake and metabolism, transient and early response [14, 15, 16, 17]
Potra2n5c12524	AT3G05200	RING/U-box superfamily protein|ATL6	C2H2	up				010min	down nit vs amm (phytozome data [27]); DEG [5]; mentioned in [14]
Potra2n9c19918	AT1G05575	transmembrane protein		up					down nit vs amm (phytozome data [27]); DEG [10]
Potra2n1c940	AT1G12600	UDP-N-acetylglucosamine (UAA) transporter family		up	up				down nit vs amm (phytozome data [27]); DEG [10]
Potra2n384s35498	AT1G54070	Dormancy/auxin associated family protein			up	down			down nit vs amm (phytozome data [27]); DEG [10]
Potra2n15c28674	AT1G74380	xyloglucan xylosyltransferase 5|XXT5		up					down nit vs amm (phytozome data [27]); DEG [10]
Potra2n10c21282	AT1G75290	NAD(P)-binding Rossmann-fold superfamily protein		down					down nit vs amm (phytozome data [27]); DEG [10]
Potra2n7c15783	AT1G76980	patatin-like phospholipase domain protein			up				down nit vs amm (phytozome data [27]); DEG [10]
Potra2n11c23033	AT1G78440	gibberellin 2-beta-dioxygenase|ATGA2OX1,GA2OX1		up		down			down nit vs amm (phytozome data [27]); DEG [10]
Potra2n2c4369	AT2G05710	aconitase 3|ACO3		up					down nit vs amm (phytozome data [27]); DEG [10]
Potra2n9c19303	AT2G14960	Auxin-responsive GH3 family protein|GH3.1		up					down nit vs amm (phytozome data [27]); DEG [10]
Potra2n18c32483	AT2G18960	H[+]-ATPase 1		up					down nit vs amm (phytozome data [27]); DEG [10]
Potra2n2c5469	AT2G22500	uncoupling protein 5		up				010min	down nit vs amm (phytozome data [27]); DEG [10]
Potra2n199s34916	AT2G29420	glutathione S-transferase tau 7|ATGSTU7,GST25,GSTU7			up				down nit vs amm (phytozome data [27]); DEG [10]
Potra2n9c19920	AT2G31955	cofactor of nitrate reductase and xanthine dehydrogenase 2|CNX2		up	up				down nit vs amm (phytozome data [27]); DEG [10]
Potra2n5c12343	AT2G38820	DNA-directed RNA polymerase subunit beta-beta protein, putative (DUF506)			up				down nit vs amm (phytozome data [27]); DEG [10]
Potra2n15c28298	AT2G45660	AGAMOUS-like 20	MADS	down					down nit vs amm (phytozome data [27]); DEG [10]
Potra2n10c21738	AT3G22890	ATP sulfurylase 1|APS1		up					down nit vs amm (phytozome data [27]); DEG [10]
Potra2n8c18095	AT3G22930	calmodulin-like 11		up					down nit vs amm (phytozome data [27]); DEG [10]
Potra2n9c19208	AT3G48690	alpha/beta-Hydrolases superfamily protein|ATCXE12,CXE12	LIM	up					down nit vs amm (phytozome data [27]); DEG [10]
Potra2n7c16335	AT3G50820	photosystem II subunit O-2|OEC33,PSBO-2,PSBO2		down					down nit vs amm (phytozome data [27]); DEG [10]
Potra2n5c10922	AT3G63380	ATPase E1-E2 type family protein / haloacid dehalogenase-like hydrolase family protein		up					down nit vs amm (phytozome data [27]); DEG [10]
Potra2n19c33702	AT4G10040	cytochrome c-2|CYTC-2		up					down nit vs amm (phytozome data [27]); DEG [10]
Potra2n1c601	AT4G20170	glycosyltransferase family protein (DUF23)		up					down nit vs amm (phytozome data [27]); DEG [10]
Potra2n6c13008	AT4G31990	aspartate aminotransferase 5|AAT3,ASP5,ATAAT1			up				down nit vs amm (phytozome data [27]); DEG [10]
Potra2n6c13285	AT4G33000	calcineurin B-like protein 10|ATCBL10,CBL10,SCABP8		down					down nit vs amm (phytozome data [27]); DEG [10]
Potra2n7c16152	AT4G37640	calcium ATPase 2|ACA2		up					down nit vs amm (phytozome data [27]); DEG [10]
Potra2n1c2317	AT4G37980	cinnamyl alcohol dehydrogenase 7|ATCAD7,CAD7,ELI3,ELI3-1			up				down nit vs amm (phytozome data [27]); DEG [10]
Potra2n16c30119	AT5G03380	Heavy metal transport/detoxification superfamily protein			down				down nit vs amm (phytozome data [27]); DEG [10]
Potra2n1c1901	AT5G04760	Duplicated homeodomain-like superfamily protein	MYB	up					down nit vs amm (phytozome data [27]); DEG [10]
Potra2n8c16718	AT5G13750	zinc induced facilitator-like 1|ZIFL1			up				down nit vs amm (phytozome data [27]); DEG [10]
Potra2n15c28782	AT5G16110	hypothetical protein		down					down nit vs amm (phytozome data [27]); DEG [10]
Potra2n4c9291	AT5G17380	Thiamine pyrophosphate dependent pyruvate decarboxylase family protein		up					down nit vs amm (phytozome data [27]); DEG [10]
Potra2n18c32565	AT5G19550	aspartate aminotransferase 2|AAT2,ASP2		up	up				down nit vs amm (phytozome data [27]); DEG [10]
Potra2n7c16632	AT5G23400	Leucine-rich repeat (LRR) family protein		up					down nit vs amm (phytozome data [27]); DEG [10]
Potra2n18c33136	AT5G24930	zinc finger CONSTANS-like protein|ATCOL4,COL4	C2C2	down					down nit vs amm (phytozome data [27]); DEG [10]
Potra2n5c12621	AT5G27760	Hypoxia-responsive family protein		up	up				down nit vs amm (phytozome data [27]); DEG [10]
Potra2n4c9013	AT5G46330	Leucine-rich receptor-like protein kinase family protein		up					down nit vs amm (phytozome data [27]); DEG [10]
Potra2n1c3211	AT5G47640	nuclear factor Y, subunit B2|NF-YB2	Hap3/NF		up			None	down nit vs amm (phytozome data [27]); DEG [10]
Potra2n15c28437	AT5G50210	quinolinate synthase|OLD5,QS,SUFE3			up				down nit vs amm (phytozome data [27]); DEG [10]
Potra2n19c33348	AT5G54490	pinoid-binding protein 1|PBP1		up					down nit vs amm (phytozome data [27]); DEG [10]
Potra2n5c10790	AT5G66460	Glycosyl hydrolase superfamily protein		up					down nit vs amm (phytozome data [27]); DEG [10]
Potra2n11c22691				down					down nit vs amm (phytozome data [27]); DEG [10]
Potra2n10c21447				down					down nit vs amm (phytozome data [27]); DEG [10]
Potra2n8c17402				up					down nit vs amm (phytozome data [27]); DEG [10]
Potra2n1c631				up					down nit vs amm (phytozome data [27]); DEG [10]
Potra2n8c18086	AT1G60680	NAD(P)-linked oxidoreductase superfamily protein		down					down nit vs amm (phytozome data [27]); DEG [10]; DEG in response to external nitrate concentration in shoots [6]
Potra2n1c496	AT1G69040	ACT domain repeat 4|ACR4		up	up			010min	down nit vs amm (phytozome data [27]); DEG [10]; DEG in response to external nitrate concentration in shoots [6]
Potra2n3c8109	AT3G13750	beta galactosidase 1|BGAL1		up					down nit vs amm (phytozome data [27]); DEG [10]; DEG in response to external nitrate concentration in shoots [6]
Potra2n2c4144	AT5G48485	Bifunctional inhibitor/lipid-transfer protein/seed storage 2S albumin superfamily protein|DIR1		down					down nit vs amm (phytozome data [27]); DEG [10]; DEG in response to external nitrate concentration in shoots [6]
Potra2n14c26445	AT1G27730	salt tolerance zinc finger|STZ,ZAT10	C2H2	up					down nit vs amm (phytozome data [27]); DEG [10]; DEG [5]
Potra2n6c14636	AT1G62440	leucine-rich repeat/extensin 2|LRX2		up					down nit vs amm (phytozome data [27]); DEG [10]; DEG [5]
Potra2n1c827	AT1G63940	monodehydroascorbate reductase 6|MDAR6		up	up			010min	down nit vs amm (phytozome data [27]); DEG [10]; DEG [5]
Potra2n10c21696	AT4G14819	hypothetical protein (DUF1677)		down					down nit vs amm (phytozome data [27]); DEG [10]; DEG [5]
Potra2n13c25024	AT4G27280	Calcium-binding EF-hand family protein		up					down nit vs amm (phytozome data [27]); DEG [10]; DEG [5]
Potra2n6c14579	AT5G02230	Haloacid dehalogenase-like hydrolase (HAD) superfamily protein			up				down nit vs amm (phytozome data [27]); DEG [10]; DEG [5]
Potra2n11c23018	AT5G55180	O-Glycosyl hydrolases family 17 protein		up					down nit vs amm (phytozome data [27]); DEG [10]; DEG [5]
Potra2n8c17288	AT4G14270	polyadenylate-binding protein interacting protein		down					down nit vs amm (phytozome data [27]); DEG [10]; DEG [5]; DEG in response to external nitrate concentration in shoots [6]
Potra2n19c33920	AT1G08450	calreticulin 3|AtCRT3,CRT3,EBS2,PSL1		up	up				down nit vs amm (phytozome data [27]); DEG [10]; down 0N vs 15NO [5]
Potra2n16c30290	AT2G38120	Transmembrane amino acid transporter family protein		up					down nit vs amm (phytozome data [27]); DEG [10]; down 0N vs 15NO [5]
Potra2n1c2900	AT3G27200	Cupredoxin superfamily protein		down					down nit vs amm (phytozome data [27]); DEG [10]; down 0N vs 15NO [5]
Potra2n16c30409	AT5G01650	Tautomerase/MIF superfamily protein		up					down nit vs amm (phytozome data [27]); DEG [10]; down 0N vs 15NO [5]
Potra2n2c5436	AT5G65640	beta HLH protein 93|bHLH093	bHLH	down					down nit vs amm (phytozome data [27]); DEG [10]; up [22]
Potra2n2c5467	AT1G09750	Eukaryotic aspartyl protease family protein		up					down nit vs amm (phytozome data [27]); DEG [10]; up 0N vs 15NO [5]
Potra2n1c478	AT1G27290	transmembrane protein			up				down nit vs amm (phytozome data [27]); DEG [10]; up 0N vs 15NO [5]
Potra2n2c5671	AT1G44350	IAA-amino acid hydrolase ILR1-like 6|ILL6		up	up				down nit vs amm (phytozome data [27]); DEG [10]; up 0N vs 15NO [5]
Potra2n19c34115	AT1G55530	RING/U-box superfamily protein	C2H2		down				down nit vs amm (phytozome data [27]); DEG [10]; up 0N vs 15NO [5]
Potra2n3c7388	AT1G63120	RHOMBOID-like 2|ATRBL2,RBL2		up					down nit vs amm (phytozome data [27]); DEG [10]; up 0N vs 15NO [5]
Potra2n4c9338	AT1G67070	Mannose-6-phosphate isomerase, type I|DIN9,PMI2		up					down nit vs amm (phytozome data [27]); DEG [10]; up 0N vs 15NO [5]
Potra2n16c30400	AT2G38320	TRICHOME BIREFRINGENCE-LIKE 34|TBL34		down					down nit vs amm (phytozome data [27]); DEG [10]; up 0N vs 15NO [5]
Potra2n2c4582	AT3G16770	ethylene-responsive element binding protein|ATEBP,EBP,ERF72,RAP2.3	AP2	up					down nit vs amm (phytozome data [27]); DEG [10]; up 0N vs 15NO [5]
Potra2n9c18940	AT3G51300	RHO-related protein from plants 1|ARAC11,ATRAC11,ATROP1,ROP1,ROP1AT		down					down nit vs amm (phytozome data [27]); DEG [10]; up 0N vs 15NO [5]
Potra2n13c25226	AT3G51300	RHO-related protein from plants 1|ARAC11,ATRAC11,ATROP1,ROP1,ROP1AT		down					down nit vs amm (phytozome data [27]); DEG [10]; up 0N vs 15NO [5]
Potra2n6c14084	AT5G21960	Integrase-type DNA-binding superfamily protein	AP2	up					down nit vs amm (phytozome data [27]); DEG [10]; up 0N vs 15NO [5]
Potra2n3c6882	AT5G48850	Tetratricopeptide repeat (TPR)-like superfamily protein|ATSDI1			up				down nit vs amm (phytozome data [27]); DEG [10]; up 0N vs 15NO [5]
Potra2n12c24569	AT5G50720	HVA22 homologue E|ATHVA22E,HVA22E		down					down nit vs amm (phytozome data [27]); DEG [10]; up 0N vs 15NO [5]
Potra2n19c33300	AT5G58350	with no lysine (K) kinase 4|WNK4,ZIK2			up				down nit vs amm (phytozome data [27]); DEG [10]; up 0N vs 15NO [5]
Potra2n14c26520	AT5G67090	Subtilisin-like serine endopeptidase family protein			up				down nit vs amm (phytozome data [27]); DEG [10]; up 0N vs 15NO [5]
Potra2n14c27463					down				down nit vs amm (phytozome data [27]); DEG [10]; up 0N vs 15NO [5]
Potra2n8c17392	AT2G02990	ribonuclease 1|ATRNS1,RNS1		up					down nit vs amm (phytozome data [27]); DEG [10]; up 0N vs 15NO [5]; DEG in response to external nitrate concentration in shoots [6]
Potra2n7c15824	AT1G01720	NAC (No Apical Meristem) domain transcriptional regulator superfamily protein|ANAC002,ATAF1	NAM		up				down nit vs amm (phytozome data [27]); DEG [10]; up 15AN vs 15NH [5]; mentioned in [14]; DEG in response to external nitrate in shoots [6]
Potra2n18c33092	AT1G80840	WRKY DNA-binding protein 40|ATWRKY40,WRKY40	WRKY		up				down nit vs amm (phytozome data [27]); DEG [10]; up 15NH vs 1_5AN [5]; mentioned in [14]
Potra2n125s34633	AT5G64850	sorbin/SH3 domain protein			down				down nit vs amm (phytozome data [27]); DEG [10]; up 15NO vs 15AN [5]
Potra2n14c27834	AT4G12800	photosystem I subunit l|PSAL		down					down nit vs amm (phytozome data [27]); DEG [10]; up 15NO vs 15NH [5]
Potra2n6c15338	AT4G16370	oligopeptide transporter|ATOPT3,OPT3		up				090min	down nit vs amm (phytozome data [27]); DEG [10]; up 15NO vs 15NH [5]
Potra2n2c6209	AT1G19870	IQ-domain 32|iqd32		down					down nit vs amm (phytozome data [27]); down 0N vs 15NO [5]
Potra2n5c11849	AT2G17760	Eukaryotic aspartyl protease family protein		up					down nit vs amm (phytozome data [27]); down 0N vs 15NO [5]
Potra2n5c10749	AT4G16190	Papain family cysteine protease		down					down nit vs amm (phytozome data [27]); down 0N vs 15NO [5]
Potra2n18c33235	AT4G31290	ChaC-like family protein		up					down nit vs amm (phytozome data [27]); down 0N vs 15NO [5]
Potra2n9c19446	AT5G12840	nuclear factor Y, subunit A1|ATHAP2A,EMB2220,HAP2A,NF-YA1	Hap2/NF	down		down			down nit vs amm (phytozome data [27]); down 0N vs 15NO [5]
Potra2n2c4891	AT5G41761	hypothetical protein		down		down			down nit vs amm (phytozome data [27]); down 0N vs 15NO [5]
Potra2n1c1406	AT4G20070	allantoate amidohydrolase|AAH,ATAAH			down				down nit vs amm (phytozome data [27]); down 0N vs 15NO [5]; DEG in response to external nitrate concentration in shoots [6]
Potra2n2c5449	AT1G09970	Leucine-rich receptor-like protein kinase family protein|LRR XI-23,RLK7		up					down nit vs amm (phytozome data [27]); down 0N vs 15NO [5]; mentioned in [14]
Potra2n4c8780	AT3G58610	ketol-acid reductoisomerase		up				030min	down nit vs amm (phytozome data [27]); HHO5 target [3]
Potra2n10c20586	AT3G12570	FYD|FYD		up				090min	down nit vs amm (phytozome data [27]); HHO6 target [3]
Potra2n6c14840	AT5G20350	Ankyrin repeat family protein with DHHC zinc finger domain-containing protein|TIP1		up				None	down nit vs amm (phytozome data [27]); HHO6 target [3]
Potra2n8c17839	AT1G14920	GRAS family transcription factor family protein|GAI,RGA2	GRAS	up					down nit vs amm (phytozome data [27]); mentioned in [14]
Potra2n16c30399	AT2G38310	PYR1-like 4|PYL4,RCAR10			up				down nit vs amm (phytozome data [27]); mentioned in [14]
Potra2n9c18729	AT3G20770	Ethylene insensitive 3 family protein|AtEIN3,EIN3	EIL	up					down nit vs amm (phytozome data [27]); mentioned in [14]
Potra2n7c16575	AT4G37790	Homeobox-leucine zipper protein family|HAT22	Homobox	up					down nit vs amm (phytozome data [27]); mentioned in [14]
Potra2n3c7770	AT5G47100	calcineurin B-like protein 9		down					down nit vs amm (phytozome data [27]); mentioned in [14]
Potra2n12c24705	AT5G45100	SBP (S-ribonuclease binding protein) family protein	C2H2	up				None	down nit vs amm (phytozome data [27]); TGA1, PHL1 target [3]
Potra2n17c30578	AT1G17830	hypothetical protein (DUF789)			up	down		020min	down nit vs amm (phytozome data [27]); up 0N vs 15NO [5]
Potra2n5c10799	AT1G19530	DNA polymerase epsilon catalytic subunit A		down					down nit vs amm (phytozome data [27]); up 0N vs 15NO [5]
Potra2n1c3303	AT1G78440	gibberellin 2-beta-dioxygenase|ATGA2OX1,GA2OX1		up	up				down nit vs amm (phytozome data [27]); up 0N vs 15NO [5]
Potra2n7c16327	AT2G23450	Protein kinase superfamily protein			up				down nit vs amm (phytozome data [27]); up 0N vs 15NO [5]
Potra2n8c17154	AT2G39800	delta1-pyrroline-5-carboxylate synthase 1|ATP5CS,P5CS1			up				down nit vs amm (phytozome data [27]); up 0N vs 15NO [5]
Potra2n8c17293	AT3G10985	senescence associated gene 20|ATWI-12,SAG20,WI12		up					down nit vs amm (phytozome data [27]); up 0N vs 15NO [5]
Potra2n10c21066	AT3G15580	Ubiquitin-like superfamily protein|APG8H,ATG8I		up					down nit vs amm (phytozome data [27]); up 0N vs 15NO [5]
Potra2n4c9236	AT3G17980	Calcium-dependent lipid-binding (CaLB domain) family protein		down					down nit vs amm (phytozome data [27]); up 0N vs 15NO [5]
Potra2n5c11652	AT3G50820	photosystem II subunit O-2|OEC33,PSBO-2,PSBO2		down					down nit vs amm (phytozome data [27]); up 0N vs 15NO [5]
Potra2n9c19570	AT3G51780	BCL-2-associated athanogene 4|ATBAG4,BAG4		down					down nit vs amm (phytozome data [27]); up 0N vs 15NO [5]
Potra2n8c17115	AT3G55430	O-Glycosyl hydrolases family 17 protein		up					down nit vs amm (phytozome data [27]); up 0N vs 15NO [5]
Potra2n14c27006	AT3G61440	cysteine synthase C1|ARATH;BSAS3;1,ATCYSC1,CYSC1		up	up				down nit vs amm (phytozome data [27]); up 0N vs 15NO [5]
Potra2n1c885	AT4G11600	glutathione peroxidase 6|ATGPX6,GPX6,LSC803,PHGPX		up					down nit vs amm (phytozome data [27]); up 0N vs 15NO [5]
Potra2n9c19246	AT4G34050	S-adenosyl-L-methionine-dependent methyltransferases superfamily protein		down					down nit vs amm (phytozome data [27]); up 0N vs 15NO [5]
Potra2n6c14421	AT5G01600	ferretin 1|ATFER1,FER1		up	up				down nit vs amm (phytozome data [27]); up 0N vs 15NO [5]
Potra2n19c33939	AT5G16490	ROP-interactive CRIB motif-containing protein 4|RIC4		down					down nit vs amm (phytozome data [27]); up 0N vs 15NO [5]
Potra2n12c23924	AT5G53130	cyclic nucleotide gated channel 1|ATCNGC1,CNGC1		up					down nit vs amm (phytozome data [27]); up 0N vs 15NO [5]
Potra2n10c20690	AT5G59720	heat shock protein 18.2|HSP18.2		down					down nit vs amm (phytozome data [27]); up 0N vs 15NO [5]
Potra2n8c17168					up				down nit vs amm (phytozome data [27]); up 0N vs 15NO [5]
Potra2n7c15406				up					down nit vs amm (phytozome data [27]); up 0N vs 15NO [5]
Potra2n673s36373				up					down nit vs amm (phytozome data [27]); up 0N vs 15NO [5]
Potra2n5c11320	AT1G37130	nitrate reductase 2|ATNR2,B29,CHL3,NIA2,NIA2-1,NR,NR2			up	down		010min	down nit vs amm (phytozome data [27]); up 0N vs 15NO [5]; DEG in response to external nitrate concentration in shoots [6]
Potra2n8c18018	AT2G32150	Haloacid dehalogenase-like hydrolase (HAD) superfamily protein			up				down nit vs amm (phytozome data [27]); up 0N vs 15NO [5]; DEG in response to external nitrate concentration in shoots [6]
Potra2n7c16268	AT4G36990	heat shock factor 4|AT-HSFB1,ATHSF4,HSF4,HSFB1	HSF	up					down nit vs amm (phytozome data [27]); up 0N vs 15NO [5]; DEG in response to external nitrate concentration in shoots [6]
Potra2n9c19089	AT2G21620	Adenine nucleotide alpha hydrolases-like superfamily protein|RD2			up				down nit vs amm (phytozome data [27]); up 0N vs 15NO [5]; CRF4, CDF1 target [3]
Potra2n15c29002	AT4G27950	cytokinin response factor 4|CRF4	AP2	up				005min	down nit vs amm (phytozome data [27]); up 0N vs 15NO [5]; mentioned in [14]
Potra2n15c28992	AT5G24090	chitinase A|ATCHIA,CHIA		up					down nit vs amm (phytozome data [27]); up 15AN vs 15NH [5]
Potra2n5c12437	AT1G08720	Protein kinase superfamily protein		up					down nitrate vs amm nitrate [9]
Potra2n9c19650	AT1G50920	Nucleolar GTP-binding protein		up					down nitrate vs amm nitrate [9]
Potra2n4c8731	AT1G61110	NAC domain containing protein 25|anac025,NAC025	NAM		down				down nitrate vs amm nitrate [9]
Potra2n1c804	AT1G64140	WRKY transcription factor		up				010min	down nitrate vs amm nitrate [9]
Potra2n8c17913	AT2G01913	hypothetical protein		down					down nitrate vs amm nitrate [9]
Potra2n6c15178	AT3G09270	glutathione S-transferase TAU 8|ATGSTU8,GSTU8		up		up			down nitrate vs amm nitrate [9]
Potra2n1c3246	AT3G13200	Cwf15 / Cwc15 cell cycle control family protein|EMB2769		down					down nitrate vs amm nitrate [9]
Potra2n2c4727	AT4G01660	ABC transporter 1|ABC1,ATABC1,ATATH10		up					down nitrate vs amm nitrate [9]
Potra2n18c32672	AT4G26270	phosphofructokinase 3|PFK3		up					down nitrate vs amm nitrate [9]
Potra2n4c9807	AT4G34500	Protein kinase superfamily protein		up					down nitrate vs amm nitrate [9]
Potra2n6c14055	AT5G35570	O-fucosyltransferase family protein		up					down nitrate vs amm nitrate [9]
Potra2n2c6334	AT5G42220	Ubiquitin-like superfamily protein		up					down nitrate vs amm nitrate [9]
Potra2n13c26307	AT1G09560	germin-like protein 5|GLP5		up					down nitrate vs amm nitrate [9]; DEG in response to external nitrate concentration in shoots [6]
Potra2n1c1147	AT2G15480	UDP-glucosyl transferase 73B5|UGT73B5		up				090min	down nitrate vs amm nitrate [9]; CRF4 SNZ CDF1 HHO5 HHO6 PHL1 TGA1 target [3]
Potra2n14c26487	AT3G16150	N-terminal nucleophile aminohydrolases (Ntn hydrolases) superfamily protein			down	down	down		down nitrate vs amm nitrate [9]; DEG [5]
Potra2n14c26624	AT1G19270	DA1|DA1	C2H2	up					down nitrate vs amm nitrate [9]; down nit vs amm (phytozome data [27])
Potra2n2c6372	AT1G20670	DNA-binding bromodomain-containing protein	Bromodomain	up					down nitrate vs amm nitrate [9]; down nit vs amm (phytozome data [27])
Potra2n10c21623	AT1G60200	splicing factor PWI domain-containing protein / RNA recognition motif (RRM)-containing protein		up					down nitrate vs amm nitrate [9]; down nit vs amm (phytozome data [27])
Potra2n8c18349	AT1G70620	cyclin-like protein		up					down nitrate vs amm nitrate [9]; down nit vs amm (phytozome data [27])
Potra2n11c23181	AT1G78700	BES1/BZR1 homolog 4|BEH4	BES/BZR	up					down nitrate vs amm nitrate [9]; down nit vs amm (phytozome data [27])
Potra2n9c18721	AT2G27350	OTU-like cysteine protease family protein		up					down nitrate vs amm nitrate [9]; down nit vs amm (phytozome data [27])
Potra2n14c27673	AT2G32970	G1/S-specific cyclin-E protein		up					down nitrate vs amm nitrate [9]; down nit vs amm (phytozome data [27])
Potra2n7c15418	AT2G43970	RNA-binding protein		up					down nitrate vs amm nitrate [9]; down nit vs amm (phytozome data [27])
Potra2n197s34882	AT3G14075	Mono-/di-acylglycerol lipase, N-terminal;Lipase, class 3		up					down nitrate vs amm nitrate [9]; down nit vs amm (phytozome data [27])
Potra2n9c19521	AT5G12170	CRT (chloroquine-resistance transporter)-like transporter 3		up					down nitrate vs amm nitrate [9]; down nit vs amm (phytozome data [27])
Potra2n3c7255	AT5G41790	COP1-interactive protein 1	bZIP	up					down nitrate vs amm nitrate [9]; down nit vs amm (phytozome data [27])
Potra2n13c26206	AT5G57580	Calmodulin-binding protein		up					down nitrate vs amm nitrate [9]; down nit vs amm (phytozome data [27])
Potra2n9c19881	AT5G59960	K-stimulated pyrophosphate-energized sodium pump protein		up					down nitrate vs amm nitrate [9]; down nit vs amm (phytozome data [27])
Potra2n9c20048	AT5G60790	ABC transporter family protein|ATGCN1,GCN1		up					down nitrate vs amm nitrate [9]; down nit vs amm (phytozome data [27])
Potra2n15c28995	AT3G59140	multidrug resistance-associated protein 14|ATMRP14,MRP14			down				down nitrate vs amm nitrate [9]; down nit vs amm (phytozome data [27]); DEG in response to external nitrate concentration in shoots [6]
Potra2n9c19722	AT5G58720	smr (Small MutS Related) domain-containing protein		up				None	down nitrate vs amm nitrate [9]; down nit vs amm (phytozome data [27]); CDF1, HHO6 target [3]
Potra2n2c5124	AT3G60550	cyclin p3;2|CYCP3;2		down					down nitrate vs amm nitrate [9]; down nit vs amm (phytozome data [27]); down 0N vs 15NO [5]
Potra2n9c19070	AT4G39140	RING/U-box superfamily protein	PHD	up					down nitrate vs amm nitrate [9]; down nit vs amm (phytozome data [27]); down 0N vs 15NO [5]
Potra2n5c12529	AT3G06130	Heavy metal transport/detoxification superfamily protein			up				down nitrate vs amm nitrate [9]; down nit vs amm (phytozome data [27]); up 0N vs 15NO [5]
Potra2n8c17598	AT3G16940	calmodulin-binding transcription activator	CG1	up				None	down nitrate vs amm nitrate [9]; HHO5, HHO6 target [3]
Potra2n4c9991	AT4G38580	farnesylated protein 6		up					down nitrate vs amm nitrate [9]; up High N vs Adequate N [8]; up nit vs amm (phytozome data [27]); up 0N vs 15NO [5]
Potra2n2c5676	AT1G77490	thylakoidal ascorbate peroxidase		up					down nitrate vs amm nitrate [9]; up nit vs amm (phytozome data [27])
Potra2n17c31885	AT2G43940	S-adenosyl-L-methionine-dependent methyltransferases superfamily protein|ATHOL3,HOL3			up				down nitrate vs amm nitrate [9]; up nit vs amm (phytozome data [27])
Potra2n14c27057	AT2G46170	Reticulon family protein		up					down nitrate vs amm nitrate [9]; up nit vs amm (phytozome data [27])
Potra2n17c31171	AT3G01120	Pyridoxal phosphate (PLP)-dependent transferases superfamily protein|ATCYS1,CGS,CGS1,MTO1		up					down nitrate vs amm nitrate [9]; up nit vs amm (phytozome data [27])
Potra2n6c14782	AT3G15880	WUS-interacting protein 2	LisH	up					down nitrate vs amm nitrate [9]; up nit vs amm (phytozome data [27])
Potra2n10c22175	AT3G21510	histidine-containing phosphotransmitter 1|AHP1		down					down nitrate vs amm nitrate [9]; up nit vs amm (phytozome data [27])
Potra2n17c31004	AT3G30390	Transmembrane amino acid transporter family protein		up					down nitrate vs amm nitrate [9]; up nit vs amm (phytozome data [27])
Potra2n17c30656	AT4G25700	beta-hydroxylase 1		up					down nitrate vs amm nitrate [9]; up nit vs amm (phytozome data [27])
Potra2n14c26583	AT5G42690	transcription factor, putative (Protein of unknown function, DUF547)			down	up			down nitrate vs amm nitrate [9]; up nit vs amm (phytozome data [27])
Potra2n15c29001	AT5G53300	ubiquitin-conjugating enzyme 10|UBC10		up					down nitrate vs amm nitrate [9]; up nit vs amm (phytozome data [27])
Potra2n3c8050	AT5G45280	Pectinacetylesterase family protein		up					down nitrate vs amm nitrate [9]; up nit vs amm (phytozome data [27]); DEG in response to external nitrate concentration in shoots [6]
Potra2n10c20953	AT2G03090	expansin A15|ATEXP15,ATEXPA15,ATHEXP ALPHA 1.3,EXP15,EXPA15		up					down nitrate vs amm nitrate [9]; up nit vs amm (phytozome data [27]); DEG [5]
Potra2n12c23799	AT5G53510	oligopeptide transporter 9|ATOPT9,OPT9			down				down nitrate vs amm nitrate [9]; up nit vs amm (phytozome data [27]); DEG [5]
Potra2n5c12247	AT1G01720	NAC (No Apical Meristem) domain transcriptional regulator superfamily protein|ANAC002,ATAF1	NAM	up					down nitrate vs amm nitrate [9]; up nit vs amm (phytozome data [27]); DEG [5]; DEG in response to external nitrate concentration in shoots [6]
Potra2n4c8550	AT4G21960	Peroxidase superfamily protein|PRXR1		down				None	down nitrate vs amm nitrate [9]; up nit vs amm (phytozome data [27]); down 0N vs 15NO [5]; DEG in response to external nitrate concentration in shoots [6]; CRF4 target [3]
Potra2n6c14482	AT5G01220	sulfoquinovosyldiacylglycerol 2|SQD2			up	down		None	down nitrate vs amm nitrate [9]; up nit vs amm (phytozome data [27]); PHL1, HHO6 target [3]
Potra2n2c5105	AT3G60690	SAUR-like auxin-responsive protein family		up				None	HHO5 PHL1 TGA1 target [3]; DEG [10]
Potra2n1c2884	AT3G03470	cytochrome P450, family 87, subfamily A, polypeptide 9|CYP89A9		up				None	HHO5 target [3]
Potra2n2c5261	AT4G25000	alpha-amylase-like protein|AMY1,ATAMY1		up					HHO5 target [3]; down nit vs amm (phytozome data [27]); DEG [10]; up 0N vs 15NO [5]
Potra2n6c14819	AT5G20410	monogalactosyldiacylglycerol synthase 2|ATMGD2,MGD2			up	down		None	HHO5, HHO6, PHL1 target [3]
Potra2n8c16727	AT3G54320	Integrase-type DNA-binding superfamily protein|ASML1,ATWRI1,WRI,WRI1	AP2		down			045min	HHO6 target [3]
Potra2n1c3314	AT1G53590	Calcium-dependent lipid-binding (CaLB domain) family protein|NTMC2T6.1,NTMC2TYPE6.1		up				None	HHO6 target [3]; DEG [10]
Potra2n16c30518	AT3G08720	serine/threonine protein kinase 2		up				090min	HHO6 TGA1; DEG [10]; TGA1, HHO6 target [3]
Potra2n15c28441	AT5G50200	nitrate transmembrane transporter|ATNRT3.1,NRT3.1,WR3			up				High-affinity transporters [18, 19]; DEG in response to external nitrate concentration in shoots [6]
Potra2n15c27976	AT5G23870	Pectinacetylesterase family protein			up				[12]
Potra2n15c28638	AT5G62670	H[+]-ATPase 11|AHA11,HA11		up					[23]; DEG [5]
Potra2n14c26806	AT2G45130	SPX domain protein 3|ATSPX3,SPX3		down	up	down			mentioned in [14]
Potra2n15c28409	AT5G63160	BTB and TAZ domain protein 1|BT1	TAZ	up					mentioned in [14]; DEG in response to external nitrate concentration in shoots [6]
Potra2n1c535	AT2G33550	Homeodomain-like superfamily protein	Homeodomain	up				010min	mentioned in [14]; up [22]
Potra2n10c22278	AT4G15910	drought-induced 21|ATDI21,DI21			down			030min	NAD related; up nitrate vs amm nitrate [9]; up nit vs amm (phytozome data [27]); up 0N vs 15NO [5]
Potra2n6c14302	AT5G03720	heat shock transcription factor A3|AT-HSFA3,HSFA3	HSF	up					Nitrate-inducible [21]
Potra2n10c20664	AT2G39800	delta1-pyrroline-5-carboxylate synthase 1|ATP5CS,P5CS1		up				090min	PHL1; down nit vs amm (phytozome data [27]); DEG [10]; PHL1 target [3]
Potra2n13c26153	AT1G02900	rapid alkalinization factor 1|ATRALF1,RALF1,RALFL1		down					RALF-FER signaling network functions in cell expansion [25]; DEG in response to external nitrate concentration in shoots [6]; up nit vs amm (phytozome data [27])
Potra2n1c723	AT4G24020	NIN like protein 7	Nin		up			020min	Regulator of nitrate transcriptional responses [13, 23, 24]; down nitrate vs amm nitrate [9]; up [22]
Potra2n17c31054	AT3G02230	reversibly glycosylated polypeptide 1|ATRGP1,RGP1		up					[26]
Potra2n5c12725	AT1G56580	plant/protein (Protein of unknown function, DUF538)|SVB		down					[26]; up nit vs amm (phytozome data [27])
Potra2n8c17502	AT3G08900	reversibly glycosylated polypeptide 3|RGP,RGP3		up					[26]; up nit vs amm (phytozome data [27])
Potra2n246s35110	AT2G23620	methyl esterase 1|ATMES1,MES1			up				up [7]
Potra2n9c19332	AT3G19580	zinc-finger protein 2|AZF2,ZF2	C2H2		up				up [7]
Potra2n11c23325	AT4G20970	basic helix-loop-helix (bHLH) DNA-binding superfamily protein	bHLH		up				up [7]
Potra2n5c11113	AT5G50080	ethylene response factor 110|ERF110	AP2	up					up [7]
Potra2n9c19651	AT3G08500	myb domain protein 83|AtMYB83,MYB83	MYB	down					up [7]; down 0N vs 15NO [5]
Potra2n10c20485	AT2G28550	related to AP2.7|RAP2.7,TOE1	AP2	up					up [7]; down High N vs Adequate N [8]; up nit vs amm (phytozome data [27]); down 0N vs 15NO [5]; mentioned in [14]
Potra2n1c3288	AT1G53210	sodium/calcium exchanger family protein / calcium-binding EF hand family protein		up					up [7]; down nit vs amm (phytozome data [27])
Potra2n2c5523	AT1G78240	S-adenosyl-L-methionine-dependent methyltransferases superfamily protein|OSU1,QUA2,TSD2		up					up [7]; down nit vs amm (phytozome data [27])
Potra2n6c12972	AT1G80840	WRKY DNA-binding protein 40|ATWRKY40,WRKY40	WRKY	up					up [7]; down nit vs amm (phytozome data [27])
Potra2n19c33341	AT2G38470	WRKY DNA-binding protein 33|ATWRKY33,WRKY33	WRKY	up					up [7]; down nit vs amm (phytozome data [27])
Potra2n8c18231	AT3G23920	beta-amylase 1|BAM1,BMY7,TR-BAMY		up					up [7]; down nit vs amm (phytozome data [27])
Potra2n14c27223	AT3G62010	metal ion-binding protein		up					up [7]; down nit vs amm (phytozome data [27])
Potra2n9c18880	AT4G38400	expansin-like A2|ATEXLA2,ATEXPL2,ATHEXP BETA 2.2,EXLA2,EXPL2		up		up			up [7]; down nit vs amm (phytozome data [27])
Potra2n16c29897	AT5G06320	NDR1/HIN1-like 3|NHL3		up					up [7]; down nit vs amm (phytozome data [27])
Potra2n10c21665	AT5G26340	Major facilitator superfamily protein|ATSTP13,MSS1,STP13		up					up [7]; down nit vs amm (phytozome data [27]); DEG in response to external nitrate concentration in shoots [6]
Potra2n1c353	AT1G80920	Chaperone DnaJ-domain superfamily protein|J8			up				up [7]; down nit vs amm (phytozome data [27]); DEG [5]
Potra2n9c19486	AT3G52140	tetratricopeptide repeat (TPR)-containing protein		up	up				up [7]; down nit vs amm (phytozome data [27]); DEG [5]
Potra2n9c19066					down				up [7]; down nit vs amm (phytozome data [27]); up 0N vs 15NO [5]
Potra2n1c3617	AT1G11530	C-terminal cysteine residue is changed to a serine 1|ATCXXS1,CXXS1			down				up [7]; up 0N vs 15NO [5]
Potra2n4c10281					down				up [7]; up 0N vs 15NO [5]
Potra2n15c28464	AT2G42490	Copper amine oxidase family protein			up	up			up [7]; up nit vs amm (phytozome data [27])
Potra2n6c14404	AT3G03280	hypothetical protein		up					up [7]; up nit vs amm (phytozome data [27])
Potra2n9c19703	AT3G07600	Heavy metal transport/detoxification superfamily protein		up					up [7]; up nit vs amm (phytozome data [27])
Potra2n8c18092	AT3G22890	ATP sulfurylase 1|APS1		up	up				up [7]; up nit vs amm (phytozome data [27])
Potra2n13c25215	AT3G54420	homolog of carrot EP3-3 chitinase|ATCHITIV,ATEP3,CHIV,EP3		up	up	down			up [7]; up nit vs amm (phytozome data [27])
Potra2n6c14408	AT5G01710	methyltransferase		up					up [7]; up nit vs amm (phytozome data [27])
Potra2n13c25544	AT5G16490	ROP-interactive CRIB motif-containing protein 4|RIC4		down					up [7]; up nit vs amm (phytozome data [27])
Potra2n1c719	AT5G28540	heat shock protein 70 (Hsp 70) family protein|BIP1		up					up [7]; up nit vs amm (phytozome data [27])
Potra2n15c28802				up		down			up [7]; up nit vs amm (phytozome data [27]); DEG [5]
Potra2n1c829	AT1G63910	myb domain protein 103|AtMYB103,MYB103	MYB	down					up [7]; up nit vs amm (phytozome data [27]); down 0N vs 15NO [5]
Potra2n17c30668	AT5G17330	glutamate decarboxylase|GAD,GAD1			up				up [7]; up nit vs amm (phytozome data [27]); up 0N vs 15NO [5]; DEG in response to external nitrate concentration in shoots [6]
Potra2n18c32844	AT5G21930	P-type ATPase of Arabidopsis 2		up					up [7]; up nitrate vs amm nitrate [9]
Potra2n6c13808	AT2G18700	trehalose phosphatase/synthase 11|ATTPS11,ATTPSB,TPS11		up					up [7]; up nitrate vs amm nitrate [9]; DEG [5]
Potra2n2c5875	AT4G14130	xyloglucan endotransglucosylase/hydrolase 15|XTH15,XTR7		up					up [7]; up nitrate vs amm nitrate [9]; DEG [5]
Potra2n1c2934	AT5G40780	lysine histidine transporter 1|LHT1		up	up	down			up [7]; up nitrate vs amm nitrate [9]; down High N vs Adequate N [8]; down nit vs amm (phytozome data [27]); DEG in response to external nitrate concentration in shoots [6]
Potra2n6c14275	AT3G10050	L-O-methylthreonine resistant 1|OMR1		up					up [7]; up nitrate vs amm nitrate [9]; down nit vs amm (phytozome data [27])
Potra2n10c20147	AT3G21180	autoinhibited Ca(2+)-ATPase 9|ACA9,ATACA9		up					up [7]; up nitrate vs amm nitrate [9]; down nit vs amm (phytozome data [27]); DEG in response to external nitrate concentration in shoots [6]
Potra2n15c28249	AT5G50870	ubiquitin-conjugating enzyme 27|UBC27		down					up [7]; up nitrate vs amm nitrate [9]; down nit vs amm (phytozome data [27]); DEG [5]
Potra2n14c27675	AT2G05790	O-Glycosyl hydrolases family 17 protein		up					up [7]; up nitrate vs amm nitrate [9]; down nit vs amm (phytozome data [27]); up 0N vs 15NO [5]
Potra2n1c1360	AT4G16760	acyl-CoA oxidase 1|ACX1,ATACX1			up				up [7]; up nitrate vs amm nitrate [9]; up nit vs amm (phytozome data [27])
Potra2n16c30555	AT5G44460	calmodulin like 43|CML43		up					up [7]; up nitrate vs amm nitrate [9]; up nit vs amm (phytozome data [27])
Potra2n15c28122	AT5G62350	Plant invertase/pectin methylesterase inhibitor superfamily protein		up	down				up [7]; up nitrate vs amm nitrate [9]; up nit vs amm (phytozome data [27])
Potra2n3c6530	AT1G55230	proteinase inhibitor I4, serpin (DUF716)			up			None	up 0N vs 15NO [5]
Potra2n1c889	AT1G63440	heavy metal atpase 5|HMA5			down				up 0N vs 15NO [5]
Potra2n10c20290	AT1G66240	homolog of anti-oxidant 1|ATATX1,ATX1		down		up			up 0N vs 15NO [5]
Potra2n17c30809	AT1G66480	plastid movement impaired 2|PMI2		up					up 0N vs 15NO [5]
Potra2n5c10696	AT2G34430	light-harvesting chlorophyll-protein complex II subunit B1|LHB1B1,LHCB1.4		down					up 0N vs 15NO [5]
Potra2n17c31393	AT3G02040	senescence-related gene 3|SRG3			down	down			up 0N vs 15NO [5]
Potra2n13c26154	AT3G05500	Rubber elongation factor protein (REF)		up					up 0N vs 15NO [5]
Potra2n9c18854	AT3G07350	sulfate/thiosulfate import ATP-binding protein, putative (DUF506)			up				up 0N vs 15NO [5]
Potra2n16c29368	AT3G22142	Bifunctional inhibitor/lipid-transfer protein/seed storage 2S albumin superfamily protein		up					up 0N vs 15NO [5]
Potra2n10c21724	AT3G22810	auxin canalization protein (DUF828)			down				up 0N vs 15NO [5]
Potra2n14c26369	AT3G49780	phytosulfokine 4 precursor|ATPSK3 (FORMER SYMBOL),ATPSK4,PSK4		up					up 0N vs 15NO [5]
Potra2n3c7136	AT4G17500	ethylene responsive element binding factor 1|ATERF-1,ERF-1	AP2		up				up 0N vs 15NO [5]
Potra2n16c30330	AT5G05580	fatty acid desaturase 8|FAD8			up				up 0N vs 15NO [5]
Potra2n3c6981	AT5G50760	SAUR-like auxin-responsive protein family			down				up 0N vs 15NO [5]
Potra2n19c33894				down					up 0N vs 15NO [5]
Potra2n6c13262	AT5G26010	Protein phosphatase 2C family protein		down				015min	up 0N vs 15NO [5]; DEG in response to external nitrate concentration in shoots [6]
Potra2n13c26142	AT1G09070	soybean gene regulated by cold-2|(AT)SRC2,SRC2		up					up 15AN vs 1_5AN [5]
Potra2n2c4882	AT4G11070	WRKY family transcription factor|AtWRKY41,WRKY41	WRKY	up	up				up 15AN vs 1_5AN [5]
Potra2n2c5045	AT2G45680	TCP family transcription factor	TCP		up	down			up High N vs Adequate N [8]
Potra2n14c27366	AT4G16120	COBRA-like protein-7 precursor|ATSEB1,COBL7,SEB1			down				up High N vs Adequate N [8]
Potra2n229s35029	AT5G36930	Disease resistance protein (TIR-NBS-LRR class) family		up					up High N vs Adequate N [8]
Potra2n5c10498	AT2G33580	Protein kinase superfamily protein		up					up High N vs Adequate N [8]; DEG [5]
Potra2n6c14333	AT4G20780	calmodulin like 42|CML42			up				up High N vs Adequate N [8]; DEG [5]
Potra2n6c14339	AT5G01960	RING/U-box superfamily protein	C2H2	up					up High N vs Adequate N [8]; DEG [5]
Potra2n8c17884	AT1G68020	UDP-Glycosyltransferase / trehalose-phosphatase family protein|ATTPS6,TPS6		up					up High N vs Adequate N [8]; down nit vs amm (phytozome data [27])
Potra2n5c11746	AT1G43910	P-loop containing nucleoside triphosphate hydrolases superfamily protein			up				up High N vs Adequate N [8]; down nit vs amm (phytozome data [27]); up 0N vs 15NO [5]
Potra2n8c18344	AT1G67910	hypothetical protein		down				010min	up High N vs Adequate N [8]; down nit vs amm (phytozome data [27]); up 0N vs 15NO [5]
Potra2n10c21240	AT3G25560	NSP-interacting kinase 2|NIK2		up	up				up High N vs Adequate N [8]; down nit vs amm (phytozome data [27]); up 0N vs 15NO [5]
Potra2n1c754	AT4G23890	NAD(P)H-quinone oxidoreductase subunit S		down					up High N vs Adequate N [8]; down nit vs amm (phytozome data [27]); up 0N vs 15NO [5]
Potra2n6c12930	AT5G57685	glutamine dumper 3|ATGDU3,GDU3,LSB1		up				020min	up High N vs Adequate N [8]; down nit vs amm (phytozome data [27]); up 0N vs 15NO [5]
Potra2n19c33806	AT1G33440	Major facilitator superfamily protein			down				up High N vs Adequate N [8]; up 0N vs 15NO [5]
Potra2n9c19654	AT1G51340	MATE efflux family protein		up	up				up High N vs Adequate N [8]; up 0N vs 15NO [5]
Potra2n1c1022	AT1G70250	receptor serine/threonine kinase		up	up	down		None	up High N vs Adequate N [8]; up 0N vs 15NO [5]
Potra2n8c16931	AT2G39130	Transmembrane amino acid transporter family protein			up				up High N vs Adequate N [8]; up 0N vs 15NO [5]
Potra2n15c28548	AT5G13700	polyamine oxidase 1|APAO,ATPAO1,PAO1			up	down			up High N vs Adequate N [8]; up 0N vs 15NO [5]
Potra2n14c27704	AT5G14780	formate dehydrogenase		up	up				up High N vs Adequate N [8]; up 0N vs 15NO [5]; DEG in response to external nitrate concentration in shoots [6]
Potra2n13c25763	AT1G64760	O-Glycosyl hydrolases family 17 protein		up					up High N vs Adequate N [8]; up nit vs amm (phytozome data [27])
Potra2n6c14477	AT2G38120	Transmembrane amino acid transporter family protein		up	up				up High N vs Adequate N [8]; up nit vs amm (phytozome data [27])
Potra2n12c23981	AT1G74090	desulfo-glucosinolate sulfotransferase 18|ATSOT18,ATST5B,SOT18			up	down			up High N vs Adequate N [8]; up nit vs amm (phytozome data [27]); DEG [5]
Potra2n2c4100	AT1G04120	multidrug resistance-associated protein 5		up					up nit vs amm (phytozome data [27])
Potra2n5c10824	AT1G04430	S-adenosyl-L-methionine-dependent methyltransferases superfamily protein		up					up nit vs amm (phytozome data [27])
Potra2n18c32189	AT1G05500	Calcium-dependent lipid-binding (CaLB domain) family protein		up					up nit vs amm (phytozome data [27])
Potra2n19c33923	AT1G05840	Eukaryotic aspartyl protease family protein		up					up nit vs amm (phytozome data [27])
Potra2n4c8682	AT1G11390	Protein kinase superfamily protein		up					up nit vs amm (phytozome data [27])
Potra2n1c394	AT1G15520	pleiotropic drug resistance 12		up					up nit vs amm (phytozome data [27])
Potra2n10c22048	AT1G17100	SOUL heme-binding family protein		down					up nit vs amm (phytozome data [27])
Potra2n680s36424	AT1G17200	Uncharacterized protein family (UPF0497)			down				up nit vs amm (phytozome data [27])
Potra2n3c8098	AT1G17620	Late embryogenesis abundant (LEA) hydroxyproline-rich glycoprotein family			up				up nit vs amm (phytozome data [27])
Potra2n8c17478	AT1G18650	plasmodesmata callose-binding protein 3|PDCB3		down					up nit vs amm (phytozome data [27])
Potra2n5c10716	AT1G19835	filament-like protein (DUF869)		down					up nit vs amm (phytozome data [27])
Potra2n2c6244	AT1G20010	tubulin beta-5 chain|TUB5		down					up nit vs amm (phytozome data [27])
Potra2n10c21629	AT1G26850	S-adenosyl-L-methionine-dependent methyltransferases superfamily protein		up					up nit vs amm (phytozome data [27])
Potra2n6c15097	AT1G28110	serine carboxypeptidase-like 45|SCPL45		up					up nit vs amm (phytozome data [27])
Potra2n1c3772	AT1G32860	Glycosyl hydrolase superfamily protein		up					up nit vs amm (phytozome data [27])
Potra2n4c9690	AT1G49740	PLC-like phosphodiesterases superfamily protein			up				up nit vs amm (phytozome data [27])
Potra2n18c32974	AT1G52740	histone H2A protein 9|HTA9	Hap3/NF	down					up nit vs amm (phytozome data [27])
Potra2n2c5374	AT1G58440	FAD/NAD(P)-binding oxidoreductase family protein|SQE1,XF1		up					up nit vs amm (phytozome data [27])
Potra2n10c22056	AT1G60790	trichome birefringence-like protein (DUF828)|TBL2		up					up nit vs amm (phytozome data [27])
Potra2n4c8739	AT1G61065	1,3-beta-glucan synthase component (DUF1218)		down					up nit vs amm (phytozome data [27])
Potra2n11c23397	AT1G61350	ARM repeat superfamily protein			down				up nit vs amm (phytozome data [27])
Potra2n4c8651	AT1G61660	basic helix-loop-helix (bHLH) DNA-binding superfamily protein	bHLH	up					up nit vs amm (phytozome data [27])
Potra2n1c2905	AT1G63290	Aldolase-type TIM barrel family protein		down					up nit vs amm (phytozome data [27])
Potra2n1c766	AT1G64380	Integrase-type DNA-binding superfamily protein	AP2	up					up nit vs amm (phytozome data [27])
Potra2n1c3684	AT1G65980	thioredoxin-dependent peroxidase 1|TPX1		down				045min	up nit vs amm (phytozome data [27])
Potra2n8c18309	AT1G67740	photosystem II BY|PSBY,YCF32		down					up nit vs amm (phytozome data [27])
Potra2n10c21513	AT1G68070	Zinc finger, C3HC4 type (RING finger) family protein	C2H2	up					up nit vs amm (phytozome data [27])
Potra2n8c17739	AT1G68490	translocase subunit seca		up					up nit vs amm (phytozome data [27])
Potra2n10c21328	AT1G68540	NAD(P)-binding Rossmann-fold superfamily protein		down					up nit vs amm (phytozome data [27])
Potra2n19c33634	AT1G71980	Protease-associated (PA) RING/U-box zinc finger family protein	C2H2	up					up nit vs amm (phytozome data [27])
Potra2n19c33666	AT1G72160	Sec14p-like phosphatidylinositol transfer family protein		down					up nit vs amm (phytozome data [27])
Potra2n15c28664	AT1G74520	HVA22 homologue A		down					up nit vs amm (phytozome data [27])
Potra2n5c11276	AT1G77590	long chain acyl-CoA synthetase 9		up					up nit vs amm (phytozome data [27])
Potra2n5c12161	AT1G78080	related to AP2 4|RAP2.4	AP2	up					up nit vs amm (phytozome data [27])
Potra2n5c11390	AT1G78230	Outer arm dynein light chain 1 protein		up					up nit vs amm (phytozome data [27])
Potra2n11c22934	AT1G78610	mechanosensitive channel of small conductance-like 6|MSL6		up					up nit vs amm (phytozome data [27])
Potra2n3c7979	AT1G79930	heat shock protein 91|HSP91		up					up nit vs amm (phytozome data [27])
Potra2n8c17452	AT2G03350	DUF538 family protein (Protein of unknown function, DUF538)		down					up nit vs amm (phytozome data [27])
Potra2n9c19145	AT2G16070	plastid division2|PDV2		up	up				up nit vs amm (phytozome data [27])
Potra2n6c13986	AT2G19580	tetraspanin2|TET2		down					up nit vs amm (phytozome data [27])
Potra2n2c4096	AT2G20370	Exostosin family protein|KAM1,MUR3		up					up nit vs amm (phytozome data [27])
Potra2n5c11635	AT2G23620	methyl esterase 1|ATMES1,MES1		up					up nit vs amm (phytozome data [27])
Potra2n6c13712	AT2G24260	LJRHL1-like 1|LRL1	bHLH	up					up nit vs amm (phytozome data [27])
Potra2n18c32296	AT2G24260	LJRHL1-like 1|LRL1	bHLH	up					up nit vs amm (phytozome data [27])
Potra2n6c13209	AT2G25800	elongation factor Ts (DUF810)		up					up nit vs amm (phytozome data [27])
Potra2n4c10189	AT2G27510	ferredoxin 3|ATFD3,FD3		up	up			010min	up nit vs amm (phytozome data [27])
Potra2n9c20036	AT2G28000	chaperonin-60alpha|CH-CPN60A,CPN60A,SLP		up					up nit vs amm (phytozome data [27])
Potra2n9c19886	AT2G28720	Histone superfamily protein	Hap3/NF	down					up nit vs amm (phytozome data [27])
Potra2n6c12985	AT2G32070	Polynucleotidyl transferase, ribonuclease H-like superfamily protein		up					up nit vs amm (phytozome data [27])
Potra2n16c30255	AT2G37970	SOUL heme-binding family protein|SOUL-1		up					up nit vs amm (phytozome data [27])
Potra2n16c30474	AT2G38370	weak chloroplast movement under blue light protein (DUF827)		down					up nit vs amm (phytozome data [27])
Potra2n16c30527	AT2G38580	Mitochondrial ATP synthase D chain-related protein		up					up nit vs amm (phytozome data [27])
Potra2n6c14320	AT2G38670	phosphorylethanolamine cytidylyltransferase 1|PECT1		up					up nit vs amm (phytozome data [27])
Potra2n8c17200	AT2G39950	flocculation protein		up				None	up nit vs amm (phytozome data [27])
Potra2n16c30464	AT2G40435	transcription factor SCREAM-like protein		down					up nit vs amm (phytozome data [27])
Potra2n5c10997	AT2G43020	polyamine oxidase 2		up					up nit vs amm (phytozome data [27])
Potra2n7c15551	AT2G43290	Calcium-binding EF-hand family protein|MSS3		down					up nit vs amm (phytozome data [27])
Potra2n12c24675	AT2G44740	cyclin p4;1|CYCP4;1		down					up nit vs amm (phytozome data [27])
Potra2n5c12611	AT3G05500	Rubber elongation factor protein (REF)		up					up nit vs amm (phytozome data [27])
Potra2n16c30557	AT3G05975	Late embryogenesis abundant (LEA) hydroxyproline-rich glycoprotein family			up				up nit vs amm (phytozome data [27])
Potra2n8c17547	AT3G06550	O-acetyltransferase family protein		up					up nit vs amm (phytozome data [27])
Potra2n8c17258	AT3G11090	LOB domain-containing protein 21|LBD21	AS2	down					up nit vs amm (phytozome data [27])
Potra2n6c13569	AT3G11760	structural maintenance of chromosomes flexible hinge domain protein		up					up nit vs amm (phytozome data [27])
Potra2n1c3729	AT3G12920	SBP (S-ribonuclease binding protein) family protein	C2H2	up					up nit vs amm (phytozome data [27])
Potra2n1c3132	AT3G14770	Nodulin MtN3 family protein			up				up nit vs amm (phytozome data [27])
Potra2n11c22843	AT3G15210	ethylene responsive element binding factor 4|ATERF-4,ATERF4,ERF4,RAP2.5	AP2	up					up nit vs amm (phytozome data [27])
Potra2n1c3490	AT3G15350	Core-2/I-branching beta-1,6-N-acetylglucosaminyltransferase family protein		up					up nit vs amm (phytozome data [27])
Potra2n5c11608	AT3G19150	KIP-related protein 6		down					up nit vs amm (phytozome data [27])
Potra2n10c20159	AT3G21220	MAP kinase kinase 5		up					up nit vs amm (phytozome data [27])
Potra2n14c27572	AT3G23730	xyloglucan endotransglucosylase/hydrolase 16|XTH16		down					up nit vs amm (phytozome data [27])
Potra2n18c32072	AT3G23750	Leucine-rich repeat protein kinase family protein		up					up nit vs amm (phytozome data [27])
Potra2n2c4185	AT3G25140	Nucleotide-diphospho-sugar transferases superfamily protein|GAUT8,QUA1		up					up nit vs amm (phytozome data [27])
Potra2n14c27516	AT3G26670	magnesium transporter, putative (DUF803)		up					up nit vs amm (phytozome data [27])
Potra2n1c2894	AT3G27160	Ribosomal protein S21 family protein|GHS1		up					up nit vs amm (phytozome data [27])
Potra2n10c21919	AT3G27210	hypothetical protein		down					up nit vs amm (phytozome data [27])
Potra2n9c19887	AT3G46060	RAB GTPase homolog 8A|ARA-3,ARA3,ATRAB8A,ATRABE1C,RAB8A		down					up nit vs amm (phytozome data [27])
Potra2n1c2109	AT3G46620	zinc finger (C3HC4-type RING finger) family protein	C2H2	up					up nit vs amm (phytozome data [27])
Potra2n15c28311	AT3G48560	chlorsulfuron/imidazolinone resistant 1|AHAS,ALS,CSR1,IMR1,TZP5		up					up nit vs amm (phytozome data [27])
Potra2n7c16290	AT3G50560	NAD(P)-binding Rossmann-fold superfamily protein			down				up nit vs amm (phytozome data [27])
Potra2n16c29358	AT3G51970	acyl-CoA sterol acyl transferase 1|ASAT1,ATASAT1,ATSAT1		up					up nit vs amm (phytozome data [27])
Potra2n6c14312	AT3G52870	IQ calmodulin-binding motif family protein			up				up nit vs amm (phytozome data [27])
Potra2n19c33884	AT3G56370	Leucine-rich repeat protein kinase family protein		up					up nit vs amm (phytozome data [27])
Potra2n13c25262	AT3G58100	plasmodesmata callose-binding protein 5		up					up nit vs amm (phytozome data [27])
Potra2n5c11037	AT3G59090	tobamovirus multiplication protein		up	up				up nit vs amm (phytozome data [27])
Potra2n14c26873	AT3G60900	FASCICLIN-like arabinogalactan-protein 10|FLA10		up					up nit vs amm (phytozome data [27])
Potra2n3c6944	AT3G61470	photosystem I light harvesting complex protein|LHCA2		down					up nit vs amm (phytozome data [27])
Potra2n3c7252	AT3G61670	extra-large G-like protein, putative (DUF3133)		up					up nit vs amm (phytozome data [27])
Potra2n14c27409	AT3G62830	NAD(P)-binding Rossmann-fold superfamily protein|ATUXS2,AUD1,UXS2		up	up				up nit vs amm (phytozome data [27])
Potra2n2c4941	AT4G01370	MAP kinase 4|ATMPK4,MPK4		up					up nit vs amm (phytozome data [27])
Potra2n2c4696	AT4G01850	S-adenosylmethionine synthetase 2|AtSAM2,MAT2,SAM-2,SAM2		down					up nit vs amm (phytozome data [27])
Potra2n4c8686	AT4G05090	Inositol monophosphatase family protein			down				up nit vs amm (phytozome data [27])
Potra2n5c11356	AT4G08685	Pollen Ole e 1 allergen and extensin family protein|SAH7		up					up nit vs amm (phytozome data [27])
Potra2n15c28493	AT4G10790	UBX domain-containing protein			down				up nit vs amm (phytozome data [27])
Potra2n2c4598	AT4G13030	P-loop containing nucleoside triphosphate hydrolases superfamily protein			up				up nit vs amm (phytozome data [27])
Potra2n1c2778	AT4G13930	serine hydroxymethyltransferase 4|SHM4		down				005min	up nit vs amm (phytozome data [27])
Potra2n4c9650	AT4G15093	catalytic LigB subunit of aromatic ring-opening dioxygenase family		up					up nit vs amm (phytozome data [27])
Potra2n10c22355	AT4G16120	COBRA-like protein-7 precursor|ATSEB1,COBL7,SEB1		up					up nit vs amm (phytozome data [27])
Potra2n1c943	AT4G22990	Major Facilitator Superfamily with SPX (SYG1/Pho81/XPR1) domain-containing protein		up					up nit vs amm (phytozome data [27])
Potra2n2c5300	AT4G24210	F-box family protein|SLY1		up					up nit vs amm (phytozome data [27])
Potra2n4c10368	AT4G24330	hypothetical protein (DUF1682)		up					up nit vs amm (phytozome data [27])
Potra2n12c24490	AT4G24780	Pectin lyase-like superfamily protein		down					up nit vs amm (phytozome data [27])
Potra2n12c24596	AT4G25040	Uncharacterized protein family (UPF0497)		down					up nit vs amm (phytozome data [27])
Potra2n4c10459	AT4G25160	U-box domain-containing protein kinase family protein			up				up nit vs amm (phytozome data [27])
Potra2n3c7551	AT4G25170	Uncharacterized conserved protein (UCP012943)			up				up nit vs amm (phytozome data [27])
Potra2n6c14734	AT4G25810	xyloglucan endotransglycosylase 6|XTH23,XTR6		up		down			up nit vs amm (phytozome data [27])
Potra2n11c23443	AT4G27270	Quinone reductase family protein		up					up nit vs amm (phytozome data [27])
Potra2n15c28973	AT4G28000	P-loop containing nucleoside triphosphate hydrolases superfamily protein		up					up nit vs amm (phytozome data [27])
Potra2n3c8016	AT4G29080	phytochrome-associated protein 2|IAA27,PAP2		down					up nit vs amm (phytozome data [27])
Potra2n18c32465	AT4G30210	P450 reductase 2|AR2,ATR2		up					up nit vs amm (phytozome data [27])
Potra2n6c13838	AT4G30260	Integral membrane Yip1 family protein		up					up nit vs amm (phytozome data [27])
Potra2n6c14723	AT4G31550	WRKY DNA-binding protein 11|ATWRKY11,WRKY11	WRKY	up					up nit vs amm (phytozome data [27])
Potra2n6c13010	AT4G32020	serine/arginine repetitive matrix-like protein		down					up nit vs amm (phytozome data [27])
Potra2n9c18651	AT4G35300	tonoplast monosaccharide transporter2		up					up nit vs amm (phytozome data [27])
Potra2n7c16596	AT4G37680	heptahelical protein 4			down	down			up nit vs amm (phytozome data [27])
Potra2n9c18966	AT4G38680	glycine rich protein 2|ATCSP2,CSDP2,CSP2,GRP2	CCHC(Zn)	up					up nit vs amm (phytozome data [27])
Potra2n16c30279	AT5G01220	sulfoquinovosyldiacylglycerol 2|SQD2			up				up nit vs amm (phytozome data [27])
Potra2n6c14627	AT5G02560	histone H2A 12|HTA12	Hap3/NF	down				None	up nit vs amm (phytozome data [27])
Potra2n16c30072	AT5G03160	DnaJ P58IPK-like protein|ATP58IPK,P58IPK		up					up nit vs amm (phytozome data [27])
Potra2n6c13453	AT5G03880	Thioredoxin family protein		down					up nit vs amm (phytozome data [27])
Potra2n6c15083	AT5G04140	glutamate synthase 1|FD-GOGAT,GLS1,GLU1,GLUS		up	up				up nit vs amm (phytozome data [27])
Potra2n16c29620	AT5G04170	Calcium-binding EF-hand family protein		up					up nit vs amm (phytozome data [27])
Potra2n7c15499	AT5G09315	vacuolar sorting protein 9 domain protein			down				up nit vs amm (phytozome data [27])
Potra2n1c2486	AT5G09590	mitochondrial HSO70 2|HSC70-5,MTHSC70-2		up					up nit vs amm (phytozome data [27])
Potra2n6c12963	AT5G10840	Endomembrane protein 70 protein family		up					up nit vs amm (phytozome data [27])
Potra2n18c32862	AT5G11650	alpha/beta-Hydrolases superfamily protein		up					up nit vs amm (phytozome data [27])
Potra2n1c2382	AT5G12250	beta-6 tubulin|TUB6		down					up nit vs amm (phytozome data [27])
Potra2n16c29505	AT5G12250	beta-6 tubulin|TUB6		down					up nit vs amm (phytozome data [27])
Potra2n1c3047	AT5G14610	DEAD box RNA helicase family protein		up					up nit vs amm (phytozome data [27])
Potra2n17c31134	AT5G15470	galacturonosyltransferase 14|GAUT14		up					up nit vs amm (phytozome data [27])
Potra2n8c16842	AT5G24910	cytochrome P450, family 714, subfamily A, polypeptide 1|CYP714A1		up					up nit vs amm (phytozome data [27])
Potra2n6c13265	AT5G26030	ferrochelatase 1|ATFC-I,FC-I,FC1		up					up nit vs amm (phytozome data [27])
Potra2n5c12389	AT5G28840	GDP-D-mannose 3',5'-epimerase|GME		up					up nit vs amm (phytozome data [27])
Potra2n14c27694	AT5G35690	zinc metalloproteinase-like protein		up					up nit vs amm (phytozome data [27])
Potra2n17c30825	AT5G37770	EF hand calcium-binding protein family		up					up nit vs amm (phytozome data [27])
Potra2n3c7648	AT5G46910	Transcription factor jumonji (jmj) family protein / zinc finger (C5HC2 type) family protein	JmjC	up					up nit vs amm (phytozome data [27])
Potra2n3c8339	AT5G49940	NIFU-like protein 2|ATCNFU2,NFU2		up					up nit vs amm (phytozome data [27])
Potra2n11c22698	AT5G54530	serine protease, putative (Protein of unknown function, DUF538)		down					up nit vs amm (phytozome data [27])
Potra2n1c3601	AT5G54530	serine protease, putative (Protein of unknown function, DUF538)		down					up nit vs amm (phytozome data [27])
Potra2n1c3184	AT5G55480	SHV3-like 1|SVL1		up					up nit vs amm (phytozome data [27])
Potra2n16c30476	AT5G58380	SOS3-interacting protein 1|CIPK10,PKS2,SIP1,SNRK3.8		up					up nit vs amm (phytozome data [27])
Potra2n9c19720	AT5G58710	rotamase CYP 7|ROC7		down					up nit vs amm (phytozome data [27])
Potra2n19c33344	AT5G60490	FASCICLIN-like arabinogalactan-protein 12|FLA12			down				up nit vs amm (phytozome data [27])
Potra2n15c28079	AT5G62190	DEAD box RNA helicase (PRH75)|PRH75		up					up nit vs amm (phytozome data [27])
Potra2n7c15785	AT5G64030	S-adenosyl-L-methionine-dependent methyltransferases superfamily protein		up					up nit vs amm (phytozome data [27])
Potra2n17c31507	AT5G64230	1,8-cineole synthase		up	up				up nit vs amm (phytozome data [27])
Potra2n9c19402	AT5G64510	tunicamycin induced protein		up					up nit vs amm (phytozome data [27])
Potra2n7c16256	AT5G67080	mitogen-activated protein kinase kinase kinase 19|MAPKKK19			up				up nit vs amm (phytozome data [27])
Potra2n1c721				up	up				up nit vs amm (phytozome data [27])
Potra2n5c12509					up				up nit vs amm (phytozome data [27])
Potra2n17c30810					up				up nit vs amm (phytozome data [27])
Potra2n8c17822				down					up nit vs amm (phytozome data [27])
Potra2n355s35383				down					up nit vs amm (phytozome data [27])
Potra2n10c21448				down					up nit vs amm (phytozome data [27])
Potra2n6c14724				down					up nit vs amm (phytozome data [27])
Potra2n14c27719				down					up nit vs amm (phytozome data [27])
Potra2n15c28587				up					up nit vs amm (phytozome data [27])
Potra2n18c32632				up					up nit vs amm (phytozome data [27])
Potra2n13c25129	AT1G03670	ankyrin repeat family protein			up				up nit vs amm (phytozome data [27]);
Potra2n5c11333	AT1G36370	serine hydroxymethyltransferase 7|SHM7	WD40	up					up nit vs amm (phytozome data [27]); DEG in response to external nitrate concentration in shoots [6]
Potra2n10c22127	AT1G69870	nitrate transporter 1.7|NRT1.7			up				up nit vs amm (phytozome data [27]); DEG in response to external nitrate concentration in shoots [6]
Potra2n8c17367	AT1G79530	glyceraldehyde-3-phosphate dehydrogenase of plastid 1|GAPCP-1		up					up nit vs amm (phytozome data [27]); DEG in response to external nitrate concentration in shoots [6]
Potra2n1c1876	AT2G35940	BEL1-like homeodomain 1|BLH1,EDA29	Homobox	up				None	up nit vs amm (phytozome data [27]); DEG in response to external nitrate concentration in shoots [6]
Potra2n13c26234	AT3G05800	AtBS1(activation-tagged BRI1 suppressor 1)-interacting factor 1|AIF1	bHLH	up					up nit vs amm (phytozome data [27]); DEG in response to external nitrate concentration in shoots [6]
Potra2n2c4158	AT3G25290	Auxin-responsive family protein		up					up nit vs amm (phytozome data [27]); DEG in response to external nitrate concentration in shoots [6]
Potra2n11c22643	AT5G54800	glucose 6-phosphate/phosphate translocator 1|ATGPT1,GPT1		up					up nit vs amm (phytozome data [27]); DEG in response to external nitrate concentration in shoots [6]
Potra2n5c11398	AT5G64260	EXORDIUM like 2|EXL2		up					up nit vs amm (phytozome data [27]); DEG in response to external nitrate concentration in shoots [6]
Potra2n7c16179	AT5G67370	DUF1230 family protein (DUF1230)			up				up nit vs amm (phytozome data [27]); DEG in response to external nitrate concentration in shoots [6]
Potra2n8c18472	AT5G35630	glutamine synthetase 2|ATGSL1,GLN2,GS2		up				045min	up nit vs amm (phytozome data [27]); CRF4 target [3]
Potra2n10c22037	AT1G70580	alanine-2-oxoglutarate aminotransferase 2|AOAT2,GGT2		up				045min	up nit vs amm (phytozome data [27]); CRF4, CDF1 target [3]
Potra2n4c10242	AT1G76490	hydroxy methylglutaryl CoA reductase 1|HMG1,HMGR1		up					up nit vs amm (phytozome data [27]); DEG [5]
Potra2n2c6276	AT2G17787	cylicin		up				None	up nit vs amm (phytozome data [27]); DEG [5]
Potra2n2c6257	AT2G17880	Chaperone DnaJ-domain superfamily protein		up					up nit vs amm (phytozome data [27]); DEG [5]
Potra2n6c14588	AT2G28950	expansin A6|ATEXP6,ATEXPA6,ATHEXP ALPHA 1.8,EXPA6		up					up nit vs amm (phytozome data [27]); DEG [5]
Potra2n4c9508	AT3G02230	reversibly glycosylated polypeptide 1|ATRGP1,RGP1		up					up nit vs amm (phytozome data [27]); DEG [5]
Potra2n10c21717	AT3G04840	Ribosomal protein S3Ae		up					up nit vs amm (phytozome data [27]); DEG [5]
Potra2n2c5377	AT4G07960	Cellulose-synthase-like C12		up					up nit vs amm (phytozome data [27]); DEG [5]
Potra2n14c26477	AT4G37360	cytochrome P450, family 81, subfamily D, polypeptide 2|CYP81D2		up					up nit vs amm (phytozome data [27]); DEG [5]
Potra2n7c15784	AT5G20680	TRICHOME BIREFRINGENCE-LIKE 16		up					up nit vs amm (phytozome data [27]); DEG [5]
Potra2n1c680	AT5G42090	Lung seven transmembrane receptor family protein		up					up nit vs amm (phytozome data [27]); DEG [5]
Potra2n2c4143	AT5G48480	Lactoylglutathione lyase / glyoxalase I family protein		up					up nit vs amm (phytozome data [27]); DEG [5]
Potra2n9c19877	AT5G59305	CLAVATA 3/ESR (CLE)-like protein		down					up nit vs amm (phytozome data [27]); DEG [5]
Potra2n4c8729	AT1G11080	serine carboxypeptidase-like 31|scpl31			up				up nit vs amm (phytozome data [27]); DEG [5]; DEG in response to external nitrate concentration in shoots [6]
Potra2n14c27119	AT1G01320	Tetratricopeptide repeat (TPR)-like superfamily protein			down				up nit vs amm (phytozome data [27]); DEG [10]
Potra2n2c5399	AT1G04820	tubulin alpha-4 chain|TOR2,TUA4		down					up nit vs amm (phytozome data [27]); DEG [10]
Potra2n502s35831	AT1G05010	ethylene-forming enzyme|ACO4,EAT1,EFE		up					up nit vs amm (phytozome data [27]); DEG [10]
Potra2n10c21146	AT1G05760	Mannose-binding lectin superfamily protein|RTM1		down					up nit vs amm (phytozome data [27]); DEG [10]
Potra2n2c5902	AT1G06550	ATP-dependent caseinolytic (Clp) protease/crotonase family protein		down					up nit vs amm (phytozome data [27]); DEG [10]
Potra2n5c11003	AT1G06680	photosystem II subunit P-1|OE23,OEE2,PSBP-1,PSII-P		down					up nit vs amm (phytozome data [27]); DEG [10]
Potra2n1c549	AT1G11680	CYTOCHROME P450 51G1|CYP51,CYP51A2,CYP51G1,EMB1738		up					up nit vs amm (phytozome data [27]); DEG [10]
Potra2n3c8123	AT1G17710	Pyridoxal phosphate phosphatase-related protein			up	down			up nit vs amm (phytozome data [27]); DEG [10]
Potra2n2c5495	AT1G22480	Cupredoxin superfamily protein		down					up nit vs amm (phytozome data [27]); DEG [10]
Potra2n10c21440	AT1G23030	ARM repeat superfamily protein		up					up nit vs amm (phytozome data [27]); DEG [10]
Potra2n1c3485	AT1G28280	VQ motif-containing protein			down				up nit vs amm (phytozome data [27]); DEG [10]
Potra2n3c7598	AT1G31850	S-adenosyl-L-methionine-dependent methyltransferases superfamily protein		up					up nit vs amm (phytozome data [27]); DEG [10]
Potra2n1c3834	AT1G33265	Transmembrane proteins 14C		down					up nit vs amm (phytozome data [27]); DEG [10]
Potra2n14c27517	AT1G52140	Avr9/Cf-9 rapidly elicited protein		up					up nit vs amm (phytozome data [27]); DEG [10]
Potra2n3c8005	AT1G52230	photosystem I subunit H2|PSAH-2,PSAH2,PSI-H		down					up nit vs amm (phytozome data [27]); DEG [10]
Potra2n11c22658	AT1G54290	Translation initiation factor SUI1 family protein		down					up nit vs amm (phytozome data [27]); DEG [10]
Potra2n1c3201	AT1G55910	zinc transporter 11 precursor|ZIP11		down		up			up nit vs amm (phytozome data [27]); DEG [10]
Potra2n1c1049	AT1G62510	Bifunctional inhibitor/lipid-transfer protein/seed storage 2S albumin superfamily protein		up					up nit vs amm (phytozome data [27]); DEG [10]
Potra2n19c34009	AT1G64980	Nucleotide-diphospho-sugar transferases superfamily protein		up					up nit vs amm (phytozome data [27]); DEG [10]
Potra2n5c10753	AT1G75500	Walls Are Thin 1|WAT1		up					up nit vs amm (phytozome data [27]); DEG [10]
Potra2n2c6331	AT1G76160	SKU5 similar 5|sks5		up					up nit vs amm (phytozome data [27]); DEG [10]
Potra2n4c10032	AT1G76160	SKU5 similar 5|sks5		up					up nit vs amm (phytozome data [27]); DEG [10]
Potra2n5c10612	AT1G76160	SKU5 similar 5|sks5		up					up nit vs amm (phytozome data [27]); DEG [10]
Potra2n2c6421	AT1G76490	hydroxy methylglutaryl CoA reductase 1|HMG1,HMGR1		up					up nit vs amm (phytozome data [27]); DEG [10]
Potra2n13c25421	AT1G76690	12-oxophytodienoate reductase 2|ATOPR2,OPR2		up					up nit vs amm (phytozome data [27]); DEG [10]
Potra2n5c11136	AT1G76880	Duplicated homeodomain-like superfamily protein	MYB		down				up nit vs amm (phytozome data [27]); DEG [10]
Potra2n2c5524	AT1G78230	Outer arm dynein light chain 1 protein			down	down			up nit vs amm (phytozome data [27]); DEG [10]
Potra2n9c19271	AT2G15320	Leucine-rich repeat (LRR) family protein		up					up nit vs amm (phytozome data [27]); DEG [10]
Potra2n6c13300	AT2G26110	bromodomain protein (DUF761)		up					up nit vs amm (phytozome data [27]); DEG [10]
Potra2n18c32973	AT2G26640	3-ketoacyl-CoA synthase 11|KCS11		up					up nit vs amm (phytozome data [27]); DEG [10]
Potra2n18c32647	AT2G26730	Leucine-rich repeat protein kinase family protein		up					up nit vs amm (phytozome data [27]); DEG [10]
Potra2n10c21857	AT2G33385	actin-related protein C2B|arpc2b		down					up nit vs amm (phytozome data [27]); DEG [10]
Potra2n5c11205	AT2G34300	S-adenosyl-L-methionine-dependent methyltransferases superfamily protein		up					up nit vs amm (phytozome data [27]); DEG [10]
Potra2n10c20373	AT2G36840	ACT-like superfamily protein			down	down			up nit vs amm (phytozome data [27]); DEG [10]
Potra2n16c30193	AT2G37790	NAD(P)-linked oxidoreductase superfamily protein			up	up			up nit vs amm (phytozome data [27]); DEG [10]
Potra2n14c26466	AT2G39540	Gibberellin-regulated family protein		down		up			up nit vs amm (phytozome data [27]); DEG [10]
Potra2n2c4811	AT2G46620	P-loop containing nucleoside triphosphate hydrolases superfamily protein		up		up		015min	up nit vs amm (phytozome data [27]); DEG [10]
Potra2n1c3797	AT2G46770	NAC (No Apical Meristem) domain transcriptional regulator superfamily protein|ANAC043,EMB2301,NST1	NAM	down					up nit vs amm (phytozome data [27]); DEG [10]
Potra2n14c27215	AT2G46890	3-oxo-5-alpha-steroid 4-dehydrogenase (DUF1295)		up					up nit vs amm (phytozome data [27]); DEG [10]
Potra2n2c4159	AT3G07390	auxin-induced in root cultures-like protein|AIR12		up					up nit vs amm (phytozome data [27]); DEG [10]
Potra2n8c17549	AT3G17130	Plant invertase/pectin methylesterase inhibitor superfamily protein			up				up nit vs amm (phytozome data [27]); DEG [10]
Potra2n15c28935	AT3G17790	purple acid phosphatase 17|ATACP5,ATPAP17,PAP17		down	up	down			up nit vs amm (phytozome data [27]); DEG [10]
Potra2n4c9742	AT3G19000	2-oxoglutarate (2OG) and Fe(II)-dependent oxygenase superfamily protein			up				up nit vs amm (phytozome data [27]); DEG [10]
Potra2n8c18101	AT3G22970	hypothetical protein (DUF506)		down					up nit vs amm (phytozome data [27]); DEG [10]
Potra2n17c31438	AT3G23820	UDP-D-glucuronate 4-epimerase 6|GAE6		up					up nit vs amm (phytozome data [27]); DEG [10]
Potra2n6c13940	AT3G24420	alpha/beta-Hydrolases superfamily protein			down				up nit vs amm (phytozome data [27]); DEG [10]
Potra2n13c25212	AT3G25180	cytochrome P450, family 82, subfamily G, polypeptide 1|CYP82G1			up				up nit vs amm (phytozome data [27]); DEG [10]
Potra2n17c31864	AT3G25500	formin homology 1|AFH1,AHF1,ATFH1,FH1		up					up nit vs amm (phytozome data [27]); DEG [10]
Potra2n8c18351	AT3G26590	MATE efflux family protein			up				up nit vs amm (phytozome data [27]); DEG [10]
Potra2n4c10139	AT3G43720	Bifunctional inhibitor/lipid-transfer protein/seed storage 2S albumin superfamily protein		up					up nit vs amm (phytozome data [27]); DEG [10]
Potra2n4c9465	AT3G47520	malate dehydrogenase|MDH		up	up			010min	up nit vs amm (phytozome data [27]); DEG [10]
Potra2n12c23853	AT3G49220	Plant invertase/pectin methylesterase inhibitor superfamily		up					up nit vs amm (phytozome data [27]); DEG [10]
Potra2n8c16805	AT3G54260	TRICHOME BIREFRINGENCE-LIKE 36|TBL36		down					up nit vs amm (phytozome data [27]); DEG [10]
Potra2n16c29536	AT3G56710	sigma factor binding protein 1			down				up nit vs amm (phytozome data [27]); DEG [10]
Potra2n6c14908	AT3G57680	Peptidase S41 family protein			down			None	up nit vs amm (phytozome data [27]); DEG [10]
Potra2n2c4733	AT3G62020	germin-like protein 10|GLP10		down					up nit vs amm (phytozome data [27]); DEG [10]
Potra2n14c27227	AT3G62020	germin-like protein 10|GLP10		down					up nit vs amm (phytozome data [27]); DEG [10]
Potra2n2c4635	AT3G62410	CP12 domain-containing protein 2|CP12,CP12-2		up					up nit vs amm (phytozome data [27]); DEG [10]
Potra2n10c20549	AT4G01470	tonoplast intrinsic protein 1;3|ATTIP1.3,GAMMA-TIP3,TIP1;3		up					up nit vs amm (phytozome data [27]); DEG [10]
Potra2n10c21065	AT4G01850	S-adenosylmethionine synthetase 2|AtSAM2,MAT2,SAM-2,SAM2		up					up nit vs amm (phytozome data [27]); DEG [10]
Potra2n19c33327	AT4G03210	xyloglucan endotransglucosylase/hydrolase 9|XTH9		up					up nit vs amm (phytozome data [27]); DEG [10]
Potra2n1c3805	AT4G10490	2-oxoglutarate (2OG) and Fe(II)-dependent oxygenase superfamily protein		up					up nit vs amm (phytozome data [27]); DEG [10]
Potra2n8c18156	AT4G14420	HR-like lesion-inducing protein-like protein		down					up nit vs amm (phytozome data [27]); DEG [10]
Potra2n6c14907	AT4G15550	indole-3-acetate beta-D-glucosyltransferase|IAGLU		up					up nit vs amm (phytozome data [27]); DEG [10]
Potra2n3c7310	AT4G23496	SPIRAL1-like5|SP1L5		down					up nit vs amm (phytozome data [27]); DEG [10]
Potra2n5c10737	AT4G24160	alpha/beta-Hydrolases superfamily protein		up					up nit vs amm (phytozome data [27]); DEG [10]
Potra2n2c5485	AT4G24380	dihydrofolate reductase		down					up nit vs amm (phytozome data [27]); DEG [10]
Potra2n17c31404	AT4G25040	Uncharacterized protein family (UPF0497)			up				up nit vs amm (phytozome data [27]); DEG [10]
Potra2n4c10071	AT4G33790	Jojoba acyl CoA reductase-related male sterility protein			up				up nit vs amm (phytozome data [27]); DEG [10]
Potra2n611s36149	AT4G34200	D-3-phosphoglycerate dehydrogenase|EDA9		up					up nit vs amm (phytozome data [27]); DEG [10]
Potra2n5c11919	AT4G35090	catalase 2|CAT2			up			None	up nit vs amm (phytozome data [27]); DEG [10]
Potra2n16c30352	AT5G01320	Thiamine pyrophosphate dependent pyruvate decarboxylase family protein		up					up nit vs amm (phytozome data [27]); DEG [10]
Potra2n6c14360	AT5G01920	Protein kinase superfamily protein			up				up nit vs amm (phytozome data [27]); DEG [10]
Potra2n10c20592	AT5G02500	heat shock cognate protein 70-1|AT-HSC70-1,HSC70,HSC70-1,HSP70-1		up					up nit vs amm (phytozome data [27]); DEG [10]
Potra2n10c20765	AT5G05580	fatty acid desaturase 8|FAD8		up					up nit vs amm (phytozome data [27]); DEG [10]
Potra2n5c10711	AT5G06300	Putative lysine decarboxylase family protein		up		down			up nit vs amm (phytozome data [27]); DEG [10]
Potra2n3c6713	AT5G07030	Eukaryotic aspartyl protease family protein		up					up nit vs amm (phytozome data [27]); DEG [10]
Potra2n1c232	AT5G07030	Eukaryotic aspartyl protease family protein		up					up nit vs amm (phytozome data [27]); DEG [10]
Potra2n3c6613	AT5G12950	proline-tRNA ligase (DUF1680)			down	up			up nit vs amm (phytozome data [27]); DEG [10]
Potra2n10c20512	AT5G13580	ABC-2 type transporter family protein			up				up nit vs amm (phytozome data [27]); DEG [10]
Potra2n13c25668	AT5G17700	MATE efflux family protein			up				up nit vs amm (phytozome data [27]); DEG [10]
Potra2n15c27988	AT5G23760	Copper transport protein family		up					up nit vs amm (phytozome data [27]); DEG [10]
Potra2n17c30939	AT5G38510	Rhomboid-related intramembrane serine protease family protein			down				up nit vs amm (phytozome data [27]); DEG [10]
Potra2n3c7270	AT5G41670	6-phosphogluconate dehydrogenase family protein		up	up			010min	up nit vs amm (phytozome data [27]); DEG [10]
Potra2n14c26614	AT5G42650	allene oxide synthase|AOS,CYP74A,DDE2		up					up nit vs amm (phytozome data [27]); DEG [10]
Potra2n7c16259	AT5G42930	alpha/beta-Hydrolases superfamily protein			up	down			up nit vs amm (phytozome data [27]); DEG [10]
Potra2n4c9127	AT5G52510	SCARECROW-like 8|SCL8	GRAS	up					up nit vs amm (phytozome data [27]); DEG [10]
Potra2n11c22739	AT5G54270	light-harvesting chlorophyll B-binding protein 3|LHCB3,LHCB3*1		down					up nit vs amm (phytozome data [27]); DEG [10]
Potra2n1c3619	AT5G54690	galacturonosyltransferase 12|GAUT12,IRX8,LGT6		down					up nit vs amm (phytozome data [27]); DEG [10]
Potra2n11c22987	AT5G55050	GDSL-like Lipase/Acylhydrolase superfamily protein		up					up nit vs amm (phytozome data [27]); DEG [10]
Potra2n1c16	AT5G56350	Pyruvate kinase family protein		up					up nit vs amm (phytozome data [27]); DEG [10]
Potra2n6c14701	AT5G57150	basic helix-loop-helix (bHLH) DNA-binding superfamily protein	bHLH	up					up nit vs amm (phytozome data [27]); DEG [10]
Potra2n8c17134	AT5G59550	zinc finger (C3HC4-type RING finger) family protein	C2H2	up					up nit vs amm (phytozome data [27]); DEG [10]
Potra2n15c28621	AT5G62620	Galactosyltransferase family protein		up					up nit vs amm (phytozome data [27]); DEG [10]
Potra2n2c6134					down				up nit vs amm (phytozome data [27]); DEG [10]
Potra2n16c29601					up				up nit vs amm (phytozome data [27]); DEG [10]
Potra2n17c31807				down					up nit vs amm (phytozome data [27]); DEG [10]
Potra2n10c20776				up					up nit vs amm (phytozome data [27]); DEG [10]
Potra2n689s36477				up					up nit vs amm (phytozome data [27]); DEG [10]
Potra2n6c13195	AT2G25810	tonoplast intrinsic protein 4;1|TIP4;1		down					up nit vs amm (phytozome data [27]); DEG [10]; DEG in response to external nitrate concentration in shoots [6]
Potra2n1c2001	AT2G44300	Bifunctional inhibitor/lipid-transfer protein/seed storage 2S albumin superfamily protein		up					up nit vs amm (phytozome data [27]); DEG [10]; DEG in response to external nitrate concentration in shoots [6]
Potra2n2c4883	AT4G01070	UDP-Glycosyltransferase superfamily protein|GT72B1,UGT72B1		up					up nit vs amm (phytozome data [27]); DEG [10]; DEG in response to external nitrate concentration in shoots [6]
Potra2n15c29219	AT5G24660	response to low sulfur 2|LSU2		up					up nit vs amm (phytozome data [27]); DEG [10]; DEG in response to external nitrate concentration in shoots [6]
Potra2n1c3029	AT5G40450	A-kinase anchor-like protein		up					up nit vs amm (phytozome data [27]); DEG [10]; DEG in response to external nitrate concentration in shoots [6]
Potra2n15c28440	AT5G50200	nitrate transmembrane transporter|ATNRT3.1,NRT3.1,WR3		up	up				up nit vs amm (phytozome data [27]); DEG [10]; DEG in response to external nitrate concentration in shoots [6]
Potra2n1c2838	AT5G41040	HXXXD-type acyl-transferase family protein			down				up nit vs amm (phytozome data [27]); DEG [10]; DEG in response to external nitrate concentration in shoots [6]; First target of systemic signals is N uptake and metabolism, transient and early response [14, 15, 16, 17]
Potra2n13c24942	AT1G14320	Ribosomal protein L16p/L10e family protein|RPL10,RPL10A,SAC52		up				None	up nit vs amm (phytozome data [27]); DEG [10]; DEG [5]
Potra2n14c26593	AT1G47710	Serine protease inhibitor (SERPIN) family protein		up					up nit vs amm (phytozome data [27]); DEG [10]; DEG [5]
Potra2n5c11107	AT1G71695	Peroxidase superfamily protein		up					up nit vs amm (phytozome data [27]); DEG [10]; DEG [5]
Potra2n18c32390	AT2G18670	RING/U-box superfamily protein	C2H2	up					up nit vs amm (phytozome data [27]); DEG [10]; DEG [5]
Potra2n12c24542	AT3G01930	Major facilitator superfamily protein		up					up nit vs amm (phytozome data [27]); DEG [10]; DEG [5]
Potra2n197s34876	AT3G14067	Subtilase family protein		up					up nit vs amm (phytozome data [27]); DEG [10]; DEG [5]
Potra2n6c15058	AT3G57040	response regulator 9	RR	up					up nit vs amm (phytozome data [27]); DEG [10]; DEG [5]
Potra2n8c18017	AT4G02770	photosystem I subunit D-1|PSAD-1		down					up nit vs amm (phytozome data [27]); DEG [10]; DEG [5]
Potra2n14c27101	AT4G23810	WRKY family transcription factor|ATWRKY53,WRKY53	WRKY		up				up nit vs amm (phytozome data [27]); DEG [10]; DEG [5]
Potra2n14c26462	AT4G24220	NAD(P)-binding Rossmann-fold superfamily protein|AWI31,VEP1		down					up nit vs amm (phytozome data [27]); DEG [10]; DEG [5]
Potra2n4c8757	AT4G27460	Cystathionine beta-synthase (CBS) family protein		up					up nit vs amm (phytozome data [27]); DEG [10]; DEG [5]
Potra2n6c13536	AT5G06320	NDR1/HIN1-like 3|NHL3		up					up nit vs amm (phytozome data [27]); DEG [10]; DEG [5]
Potra2n13c26203	AT5G07090	Ribosomal protein S4 (RPS4A) family protein		up					up nit vs amm (phytozome data [27]); DEG [10]; DEG [5]
Potra2n9c18776	AT5G20950	Glycosyl hydrolase family protein		up					up nit vs amm (phytozome data [27]); DEG [10]; DEG [5]
Potra2n17c31519	AT5G64250	Aldolase-type TIM barrel family protein			up				up nit vs amm (phytozome data [27]); DEG [10]; DEG [5]
Potra2n1c1684				up	up				up nit vs amm (phytozome data [27]); DEG [10]; DEG [5]
Potra2n19c34340				down					up nit vs amm (phytozome data [27]); DEG [10]; DEG [5]
Potra2n4c9696	AT2G15620	nitrite reductase 1|ATHNIR,NIR,NIR1		up	up	up		005min	up nit vs amm (phytozome data [27]); DEG [10]; DEG [5]; DEG in response to external nitrate concentration in shoots [6]
Potra2n10c20733	AT2G40000	ortholog of sugar beet HS1 PRO-1 2|ATHSPRO2,HSPRO2		up	up				up nit vs amm (phytozome data [27]); DEG [10]; DEG [5]; DEG in response to external nitrate concentration in shoots [6]
Potra2n1c796	AT5G41670	6-phosphogluconate dehydrogenase family protein		up	up			010min	up nit vs amm (phytozome data [27]); DEG [10]; DEG [5]; CRF4 target [3]
Potra2n3c7503	AT1G12110	nitrate transporter 1.1|ATNRT1,B-1,CHL1,CHL1-1,NRT1,NRT1.1		up	up				up nit vs amm (phytozome data [27]); DEG [10]; DEG [5]; High affinity nitrate transporter [13, 23, 24], Nitrate sensor [28]
Potra2n1c2895	AT3G27170	chloride channel B|ATCLC-B,CLC-B		up	up	up		045min	up nit vs amm (phytozome data [27]); DEG [10]; DEG [5]; mentioned in [14]; DEG in response to external nitrate concentration in shoots [6]
Potra2n3c7017	AT1G03080	kinase interacting (KIP1-like) family protein		down					up nit vs amm (phytozome data [27]); DEG [10]; down 0N vs 15NO [5]
Potra2n9c19352	AT1G10200	GATA type zinc finger transcription factor family protein	LIM	down					up nit vs amm (phytozome data [27]); DEG [10]; down 0N vs 15NO [5]
Potra2n4c9297	AT1G66810	Zinc finger C-x8-C-x5-C-x3-H type family protein	C3H	down					up nit vs amm (phytozome data [27]); DEG [10]; down 0N vs 15NO [5]
Potra2n10c21437	AT1G71040	Cupredoxin superfamily protein|LPR2		up					up nit vs amm (phytozome data [27]); DEG [10]; down 0N vs 15NO [5]
Potra2n4c10223	AT2G17230	EXORDIUM like 5|EXL5		down					up nit vs amm (phytozome data [27]); DEG [10]; down 0N vs 15NO [5]
Potra2n16c30051	AT2G37090	Nucleotide-diphospho-sugar transferases superfamily protein|IRX9		down					up nit vs amm (phytozome data [27]); DEG [10]; down 0N vs 15NO [5]
Potra2n9c19851	AT2G39700	expansin A4|ATEXP4,ATEXPA4,ATHEXP ALPHA 1.6,EXPA4		down					up nit vs amm (phytozome data [27]); DEG [10]; down 0N vs 15NO [5]
Potra2n19c34232	AT3G04530	phosphoenolpyruvate carboxylase kinase 2|ATPPCK2,PEPCK2,PPCK2		up					up nit vs amm (phytozome data [27]); DEG [10]; down 0N vs 15NO [5]
Potra2n14c27467	AT3G06350	dehydroquinate dehydratase, putative / shikimate dehydrogenase|EMB3004,MEE32			down	down			up nit vs amm (phytozome data [27]); DEG [10]; down 0N vs 15NO [5]
Potra2n1c3290	AT3G15050	IQ-domain 10|IQD10		down					up nit vs amm (phytozome data [27]); DEG [10]; down 0N vs 15NO [5]
Potra2n11c22774	AT3G15480	fiber (DUF1218)		down					up nit vs amm (phytozome data [27]); DEG [10]; down 0N vs 15NO [5]
Potra2n14c26485	AT3G53010	carbohydrate esterase, putative (DUF303)			down				up nit vs amm (phytozome data [27]); DEG [10]; down 0N vs 15NO [5]
Potra2n6c14513	AT3G54040	PAR1 protein		up					up nit vs amm (phytozome data [27]); DEG [10]; down 0N vs 15NO [5]
Potra2n10c21889	AT4G13510	ammonium transporter 1;1|AMT1;1,ATAMT1,ATAMT1;1		up					up nit vs amm (phytozome data [27]); DEG [10]; down 0N vs 15NO [5]
Potra2n16c29289	AT4G16380	Heavy metal transport/detoxification superfamily protein		down					up nit vs amm (phytozome data [27]); DEG [10]; down 0N vs 15NO [5]
Potra2n11c23199	AT4G18780	cellulose synthase(cesa) family protein|ATCESA8,CESA8,IRX1,LEW2	C2H2	down					up nit vs amm (phytozome data [27]); DEG [10]; down 0N vs 15NO [5]
Potra2n4c8695	AT4G21490	NAD(P)H dehydrogenase B3		down					up nit vs amm (phytozome data [27]); DEG [10]; down 0N vs 15NO [5]
Potra2n12c23793	AT4G27720	Major facilitator superfamily protein		up					up nit vs amm (phytozome data [27]); DEG [10]; down 0N vs 15NO [5]
Potra2n6c13057	AT4G32280	indole-3-acetic acid inducible 29	AUX	down					up nit vs amm (phytozome data [27]); DEG [10]; down 0N vs 15NO [5]
Potra2n2c5308	AT4G37400	cytochrome P450, family 81, subfamily F, polypeptide 3|CYP81F3		up					up nit vs amm (phytozome data [27]); DEG [10]; down 0N vs 15NO [5]
Potra2n6c13590	AT4G37980	cinnamyl alcohol dehydrogenase 7|ATCAD7,CAD7,ELI3,ELI3-1		up					up nit vs amm (phytozome data [27]); DEG [10]; down 0N vs 15NO [5]
Potra2n6c13596	AT5G06570	alpha/beta-Hydrolases superfamily protein			down				up nit vs amm (phytozome data [27]); DEG [10]; down 0N vs 15NO [5]
Potra2n2c4329	AT5G16490	ROP-interactive CRIB motif-containing protein 4|RIC4		down					up nit vs amm (phytozome data [27]); DEG [10]; down 0N vs 15NO [5]
Potra2n13c25820	AT5G18280	apyrase 2|APY2,ATAPY2		up					up nit vs amm (phytozome data [27]); DEG [10]; down 0N vs 15NO [5]
Potra2n18c32134	AT5G20190	Tetratricopeptide repeat (TPR)-like superfamily protein		down					up nit vs amm (phytozome data [27]); DEG [10]; down 0N vs 15NO [5]
Potra2n8c18011	AT5G26330	Cupredoxin superfamily protein		down					up nit vs amm (phytozome data [27]); DEG [10]; down 0N vs 15NO [5]
Potra2n10c21664	AT5G26330	Cupredoxin superfamily protein		down					up nit vs amm (phytozome data [27]); DEG [10]; down 0N vs 15NO [5]
Potra2n13c26232					up				up nit vs amm (phytozome data [27]); DEG [10]; down 0N vs 15NO [5]
Potra2n10c21258				up					up nit vs amm (phytozome data [27]); DEG [10]; down 0N vs 15NO [5]
Potra2n2c5697	AT1G77380	amino acid permease 3|AAP3,ATAAP3		up			down		up nit vs amm (phytozome data [27]); DEG [10]; down 0N vs 15NO [5]; DEG in response to external nitrate concentration in shoots [6]
Potra2n8c17474	AT3G27960	Tetratricopeptide repeat (TPR)-like superfamily protein		down				060min	up nit vs amm (phytozome data [27]); DEG [10]; down 0N vs 15NO [5]; DEG in response to external nitrate concentration in shoots [6]
Potra2n3c7085	AT4G20260	plasma-membrane associated cation-binding protein 1|ATPCAP1,PCAP1		down					up nit vs amm (phytozome data [27]); DEG [10]; down 0N vs 15NO [5]; DEG in response to external nitrate concentration in shoots [6]
Potra2n1c899	AT5G23750	Remorin family protein		down					up nit vs amm (phytozome data [27]); DEG [10]; down 0N vs 15NO [5]; DEG in response to external nitrate concentration in shoots [6]
Potra2n6c14364	AT3G56400	WRKY DNA-binding protein 70|ATWRKY70,WRKY70	WRKY		up				up nit vs amm (phytozome data [27]); DEG [10]; up [22]; nitrate-inducible [21]
Potra2n10c21293	AT1G68670	myb-like transcription factor family protein	MYB		up				up nit vs amm (phytozome data [27]); DEG [10]; up [22]; First target of systemic signals is N uptake and metabolism, transient and early response [14, 15, 16, 17]; Nitrogen-response [29]
Potra2n8c17924	AT2G37870	Bifunctional inhibitor/lipid-transfer protein/seed storage 2S albumin superfamily protein		up					up nit vs amm (phytozome data [27]); DEG [10]; up 0N vs 15NO [5]
Potra2n13c25158	AT3G09390	metallothionein 2A		down					up nit vs amm (phytozome data [27]); DEG [10]; up 0N vs 15NO [5]
Potra2n8c18601	AT3G16720	TOXICOS EN LEVADURA 2|ATL2,TL2	C2H2	up				None	up nit vs amm (phytozome data [27]); DEG [10]; up 0N vs 15NO [5]
Potra2n1c1073	AT3G47420	putative glycerol-3-phosphate transporter 1			up	down			up nit vs amm (phytozome data [27]); DEG [10]; up 0N vs 15NO [5]
Potra2n19c33586	AT4G22380	Ribosomal protein L7Ae/L30e/S12e/Gadd45 family protein		up					up nit vs amm (phytozome data [27]); DEG [10]; up 0N vs 15NO [5]
Potra2n7c16357	AT4G36790	Major facilitator superfamily protein			down				up nit vs amm (phytozome data [27]); DEG [10]; up 0N vs 15NO [5]
Potra2n12c24315	AT4G40060	homeobox protein 16|ATHB-16,ATHB16,HB16	Homobox		down				up nit vs amm (phytozome data [27]); DEG [10]; up 0N vs 15NO [5]
Potra2n16c30328	AT5G01370	ALC-interacting protein 1|ACI1			down				up nit vs amm (phytozome data [27]); DEG [10]; up 0N vs 15NO [5]
Potra2n2c5975	AT5G28150	hypothetical protein (DUF868)		down					up nit vs amm (phytozome data [27]); DEG [10]; up 0N vs 15NO [5]
Potra2n17c31267	AT5G40020	Pathogenesis-related thaumatin superfamily protein		down					up nit vs amm (phytozome data [27]); DEG [10]; up 0N vs 15NO [5]
Potra2n18c32121	AT2G26660	SPX domain-containing protein 2 (SPX2)|ATSPX2,SPX2		down	up	down			up nit vs amm (phytozome data [27]); DEG [10]; up 0N vs 15NO [5]; mentioned in [14]
Potra2n6c13067	AT1G30380	photosystem I subunit K|PSAK		down					up nit vs amm (phytozome data [27]); DEG [10]; up 15AN vs 1_5AN [5]
Potra2n14c27801	AT1G61520	PSI type III chlorophyll a/b-binding protein|LHCA3		down					up nit vs amm (phytozome data [27]); DEG [10]; up 15AN vs 1_5AN [5]
Potra2n15c28419	AT2G31880	Leucine-rich repeat protein kinase family protein|EVR,SOBIR1		up	up				up nit vs amm (phytozome data [27]); DEG [10]; up 15AN vs 15NH [5]
Potra2n4c9976	AT2G17840	Senescence/dehydration-associated protein-like protein|ERD7		up					up nit vs amm (phytozome data [27]); DEG [10]; up 15AN vs 15NH [5]; DEG in response to external nitrate concentration in shoots [6]
Potra2n9c19411	AT1G58290	Glutamyl-tRNA reductase family protein|HEMA1		up					up nit vs amm (phytozome data [27]); DEG [10]; up 15NH vs 1_5AN [5]
Potra2n18c32145	AT2G31050	Cupredoxin superfamily protein		up		down			up nit vs amm (phytozome data [27]); DEG [10]; up 15NH vs 1_5AN [5]
Potra2n1c825	AT4G11280	1-aminocyclopropane-1-carboxylic acid (acc) synthase 6|ACS6,ATACS6		up					up nit vs amm (phytozome data [27]); DEG [10]; up 15NO vs 1_5AN [5]
Potra2n15c28670	AT3G47470	light-harvesting chlorophyll-protein complex I subunit A4|CAB4,LHCA4		down					up nit vs amm (phytozome data [27]); DEG [10]; up 15NO vs 15AN [5]
Potra2n1c1476	AT1G17420	lipoxygenase 3|LOX3		up	up				up nit vs amm (phytozome data [27]); DEG [10]; up 15NO vs 15NH [5]
Potra2n2c5098	AT1G02020	nitroreductase family protein			down				up nit vs amm (phytozome data [27]); down 0N vs 15NO [5]
Potra2n4c8435	AT1G05010	ethylene-forming enzyme|ACO4,EAT1,EFE			down	down			up nit vs amm (phytozome data [27]); down 0N vs 15NO [5]
Potra2n9c18819	AT1G08250	arogenate dehydratase 6|ADT6		up					up nit vs amm (phytozome data [27]); down 0N vs 15NO [5]
Potra2n10c21016	AT1G13900	Purple acid phosphatases superfamily protein		up					up nit vs amm (phytozome data [27]); down 0N vs 15NO [5]
Potra2n5c11222	AT1G77280	kinase with adenine nucleotide alpha hydrolases-like domain-containing protein		down					up nit vs amm (phytozome data [27]); down 0N vs 15NO [5]
Potra2n13c25166	AT2G20680	Glycosyl hydrolase superfamily protein		up					up nit vs amm (phytozome data [27]); down 0N vs 15NO [5]
Potra2n13c24959	AT2G30490	cinnamate-4-hydroxylase|ATC4H,C4H,CYP73A5,REF3		down					up nit vs amm (phytozome data [27]); down 0N vs 15NO [5]
Potra2n114s34573	AT2G35100	Exostosin family protein|ARAD1		up					up nit vs amm (phytozome data [27]); down 0N vs 15NO [5]
Potra2n6c14232	AT2G36880	methionine adenosyltransferase 3|MAT3		down					up nit vs amm (phytozome data [27]); down 0N vs 15NO [5]
Potra2n10c20715	AT2G38090	Duplicated homeodomain-like superfamily protein	MYB	down					up nit vs amm (phytozome data [27]); down 0N vs 15NO [5]
Potra2n16c29504	AT2G40820	stomatal closure actin-binding-like protein		down					up nit vs amm (phytozome data [27]); down 0N vs 15NO [5]
Potra2n14c26958	AT2G45790	phosphomannomutase|ATPMM,PMM		down					up nit vs amm (phytozome data [27]); down 0N vs 15NO [5]
Potra2n13c25019	AT3G01610	cell division cycle 48C			down			120min	up nit vs amm (phytozome data [27]); down 0N vs 15NO [5]
Potra2n1c230	AT3G27890	NADPH:quinone oxidoreductase|NQR		down					up nit vs amm (phytozome data [27]); down 0N vs 15NO [5]
Potra2n7c16336	AT3G50810	Uncharacterized protein family (UPF0497)		down					up nit vs amm (phytozome data [27]); down 0N vs 15NO [5]
Potra2n5c11771	AT3G51150	ATP binding microtubule motor family protein			down				up nit vs amm (phytozome data [27]); down 0N vs 15NO [5]
Potra2n2c4886	AT3G61660	hypothetical protein		down					up nit vs amm (phytozome data [27]); down 0N vs 15NO [5]
Potra2n2c5028	AT4G00750	S-adenosyl-L-methionine-dependent methyltransferases superfamily protein		up					up nit vs amm (phytozome data [27]); down 0N vs 15NO [5]
Potra2n14c27264	AT4G01850	S-adenosylmethionine synthetase 2|AtSAM2,MAT2,SAM-2,SAM2		down					up nit vs amm (phytozome data [27]); down 0N vs 15NO [5]
Potra2n14c26937	AT4G22990	Major Facilitator Superfamily with SPX (SYG1/Pho81/XPR1) domain-containing protein			up	down			up nit vs amm (phytozome data [27]); down 0N vs 15NO [5]
Potra2n15c28316	AT4G24910	glucuronoxylan 4-O-methyltransferase-like protein (DUF579)		down					up nit vs amm (phytozome data [27]); down 0N vs 15NO [5]
Potra2n8c16735	AT5G06390	FASCICLIN-like arabinogalactan protein 17 precursor|FLA17		up					up nit vs amm (phytozome data [27]); down 0N vs 15NO [5]
Potra2n18c33011	AT5G11190	Integrase-type DNA-binding superfamily protein|SHN3	AP2	down					up nit vs amm (phytozome data [27]); down 0N vs 15NO [5]
Potra2n4c9502	AT5G15630	COBRA-like extracellular glycosyl-phosphatidyl inositol-anchored protein family			down				up nit vs amm (phytozome data [27]); down 0N vs 15NO [5]
Potra2n15c28061	AT5G52060	BCL-2-associated athanogene 1|ATBAG1,BAG1		down					up nit vs amm (phytozome data [27]); down 0N vs 15NO [5]
Potra2n1c3615	AT5G54670	kinesin 3		down					up nit vs amm (phytozome data [27]); down 0N vs 15NO [5]
Potra2n15c29105	AT5G60490	FASCICLIN-like arabinogalactan-protein 12|FLA12			down				up nit vs amm (phytozome data [27]); down 0N vs 15NO [5]
Potra2n9c20009	AT5G60490	FASCICLIN-like arabinogalactan-protein 12|FLA12			down				up nit vs amm (phytozome data [27]); down 0N vs 15NO [5]
Potra2n5c12287	AT5G64030	S-adenosyl-L-methionine-dependent methyltransferases superfamily protein		up					up nit vs amm (phytozome data [27]); down 0N vs 15NO [5]
Potra2n3c7785					down				up nit vs amm (phytozome data [27]); down 0N vs 15NO [5]
Potra2n8c18023				down					up nit vs amm (phytozome data [27]); down 0N vs 15NO [5]
Potra2n5c11765	AT4G36220	ferulic acid 5-hydroxylase 1|CYP84A1,FAH1		down					up nit vs amm (phytozome data [27]); down 0N vs 15NO [5]; DEG in response to external nitrate concentration in shoots [6]
Potra2n3c6889	AT5G13930	Chalcone and stilbene synthase family protein|ATCHS,CHS,TT4			down				up nit vs amm (phytozome data [27]); down 0N vs 15NO [5]; DEG in response to external nitrate concentration in shoots [6]
Potra2n12c24367	AT5G14920	Gibberellin-regulated family protein		down					up nit vs amm (phytozome data [27]); down 0N vs 15NO [5]; DEG in response to external nitrate concentration in shoots [6]
Potra2n3c6761	AT3G12400	Ubiquitin-conjugating enzyme/RWD-like protein|ATELC,ELC		up				None	up nit vs amm (phytozome data [27]); HHO5, HHO6 target [3]
Potra2n2c5376	AT3G30390	Transmembrane amino acid transporter family protein		up				None	up nit vs amm (phytozome data [27]); HHO5, HHO6 target [3]
Potra2n2c4260	AT3G07470	transmembrane protein, putative (Protein of unknown function, DUF538)		down				045min	up nit vs amm (phytozome data [27]); HHO6 target [3]
Potra2n2c5554	AT1G78080	related to AP2 4|RAP2.4	AP2	up				010min	up nit vs amm (phytozome data [27]); mentioned in [14]
Potra2n6c14752	AT2G26660	SPX domain-containing protein 2 (SPX2)|ATSPX2,SPX2			up	down			up nit vs amm (phytozome data [27]); mentioned in [14]
Potra2n1c2695	AT5G64300	GTP cyclohydrolase II|ATGCH,ATRIBA1,GCH,RFD1		up				060min	up nit vs amm (phytozome data [27]); PHL1 target [3]
Potra2n16c30523	AT3G51550	Malectin/receptor-like protein kinase family protein|FER		up					up nit vs amm (phytozome data [27]); RALF-FER signaling network functions in cell expansion [25]
Potra2n1c1398	AT5G44790	copper-exporting ATPase / responsive-to-antagonist 1 / copper-transporting ATPase (RAN1)|HMA7,RAN1		up		up		None	up nit vs amm (phytozome data [27]); SNZ, CDF1 target [3]
Potra2n19c33271	AT1G26910	Ribosomal protein L16p/L10e family protein		up				060min	up nit vs amm (phytozome data [27]); SNZ, CDF1, HHO6 target [3]
Potra2n15c28859	AT1G48600	S-adenosyl-L-methionine-dependent methyltransferases superfamily protein|AtPMEAMT,PMEAMT			up	up			up nit vs amm (phytozome data [27]); up 0N vs 15NO [5]
Potra2n4c9733	AT1G49570	Peroxidase superfamily protein			down	down			up nit vs amm (phytozome data [27]); up 0N vs 15NO [5]
Potra2n3c7504	AT1G62510	Bifunctional inhibitor/lipid-transfer protein/seed storage 2S albumin superfamily protein		up	up				up nit vs amm (phytozome data [27]); up 0N vs 15NO [5]
Potra2n3c6926	AT1G67360	Rubber elongation factor protein (REF)		down					up nit vs amm (phytozome data [27]); up 0N vs 15NO [5]
Potra2n8c17674	AT1G68750	phosphoenolpyruvate carboxylase 4|ATPPC4,PPC4		up					up nit vs amm (phytozome data [27]); up 0N vs 15NO [5]
Potra2n11c22600	AT1G79040	photosystem II subunit R|PSBR		down					up nit vs amm (phytozome data [27]); up 0N vs 15NO [5]
Potra2n7c16513	AT2G18050	histone H1-3|HIS1-3		down		down			up nit vs amm (phytozome data [27]); up 0N vs 15NO [5]
Potra2n5c12165	AT2G22170	Lipase/lipooxygenase, PLAT/LH2 family protein		up					up nit vs amm (phytozome data [27]); up 0N vs 15NO [5]
Potra2n16c29438	AT2G29420	glutathione S-transferase tau 7|ATGSTU7,GST25,GSTU7		up		up			up nit vs amm (phytozome data [27]); up 0N vs 15NO [5]
Potra2n2c4222	AT2G32720	cytochrome B5 isoform B		down					up nit vs amm (phytozome data [27]); up 0N vs 15NO [5]
Potra2n2c5137	AT2G44670	senescence-associated family protein (DUF581)			down	up			up nit vs amm (phytozome data [27]); up 0N vs 15NO [5]
Potra2n12c24072	AT3G17790	purple acid phosphatase 17|ATACP5,ATPAP17,PAP17		down	down	down			up nit vs amm (phytozome data [27]); up 0N vs 15NO [5]
Potra2n4c10098	AT3G44735	PHYTOSULFOKINE 3 PRECURSOR|ATPSK3,PSK1,PSK3			down				up nit vs amm (phytozome data [27]); up 0N vs 15NO [5]
Potra2n10c20389	AT3G54870	Armadillo/beta-catenin repeat family protein / kinesin motor family protein	bZIP		down				up nit vs amm (phytozome data [27]); up 0N vs 15NO [5]
Potra2n4c9643	AT4G33420	Peroxidase superfamily protein			down				up nit vs amm (phytozome data [27]); up 0N vs 15NO [5]
Potra2n14c27583	AT5G16490	ROP-interactive CRIB motif-containing protein 4|RIC4		up					up nit vs amm (phytozome data [27]); up 0N vs 15NO [5]
Potra2n13c25697				down					up nit vs amm (phytozome data [27]); up 0N vs 15NO [5]
Potra2n13c25570				up					up nit vs amm (phytozome data [27]); up 0N vs 15NO [5]
Potra2n2c6336				up					up nit vs amm (phytozome data [27]); up 0N vs 15NO [5]
Potra2n2c4816	AT2G46630	serine/arginine repetitive matrix protein			up				up nit vs amm (phytozome data [27]); up 0N vs 15NO [5]; DEG in response to external nitrate concentration in shoots [6]
Potra2n14c27100	AT4G01070	UDP-Glycosyltransferase superfamily protein|GT72B1,UGT72B1		up					up nit vs amm (phytozome data [27]); up 0N vs 15NO [5]; DEG in response to external nitrate concentration in shoots [6]
Potra2n17c30701	AT5G52510	SCARECROW-like 8|SCL8	GRAS	up					up nit vs amm (phytozome data [27]); up 0N vs 15NO [5]; CRF4, PHL1 target [3]
Potra2n14c27393	AT4G02380	senescence-associated gene 21|AtLEA5,SAG21			up				up nit vs amm (phytozome data [27]); up 15AN vs 15NH [5]; DEG in response to external nitrate concentration in shoots [6]
Potra2n13c25015	AT5G06920	FASCICLIN-like arabinogalactan protein 21 precursor|FLA21		down					up nit vs amm (phytozome data [27]); up 15NO vs 1_5AN [5]
Potra2n3c7135	AT5G51190	Integrase-type DNA-binding superfamily protein	AP2		up				up nit vs amm (phytozome data [27]); up 15NO vs 15AN [5]
Potra2n10c20444	AT3G54890	chlorophyll a-b binding protein 6|LHCA1		down					up nit vs amm (phytozome data [27]); up 15NO vs 15AN [5]; SNZ, PHL1, HHO6 target [3]
Potra2n16c29392	AT1G05310	Pectin lyase-like superfamily protein			down				up nitrate vs amm nitrate [9]
Potra2n11c23300	AT1G28380	MAC/Perforin domain-containing protein|NSL1			up				up nitrate vs amm nitrate [9]
Potra2n13c25717	AT1G28760	guanosine-3',5'-bis (diphosphate) 3'-pyrophosphohydrolase, putative (DUF2215)		up				045min	up nitrate vs amm nitrate [9]
Potra2n8c17525	AT1G48110	evolutionarily conserved C-terminal region 7|ECT7		up					up nitrate vs amm nitrate [9]
Potra2n17c31354	AT1G64750	deletion of SUV3 suppressor 1(I)|ATDSS1(I),DSS1(I)		down					up nitrate vs amm nitrate [9]
Potra2n9c19481	AT2G42280	basic helix-loop-helix (bHLH) DNA-binding superfamily protein	bHLH	up	up				up nitrate vs amm nitrate [9]
Potra2n14c27016	AT2G46060	transmembrane protein-like protein		up					up nitrate vs amm nitrate [9]
Potra2n19c33976	AT3G03140	Tudor/PWWP/MBT superfamily protein		up					up nitrate vs amm nitrate [9]
Potra2n6c13538	AT3G11660	NDR1/HIN1-like 1|NHL1		down					up nitrate vs amm nitrate [9]
Potra2n10c20757	AT3G55950	CRINKLY4 related 3|ATCRR3,CCR3			down				up nitrate vs amm nitrate [9]
Potra2n1c2289	AT3G63500	fibronectin type III domain protein (DUF1423)	PHD	up					up nitrate vs amm nitrate [9]
Potra2n8c18105	AT4G14580	CBL-interacting protein kinase 4|CIPK4,SnRK3.3		up	up				up nitrate vs amm nitrate [9]
Potra2n17c31209	AT5G39785	hypothetical protein (DUF1666)		up					up nitrate vs amm nitrate [9]
Potra2n9c20037	AT5G60760	P-loop containing nucleoside triphosphate hydrolases superfamily protein		up					up nitrate vs amm nitrate [9]
Potra2n2c6179	AT2G16430	purple acid phosphatase 10|ATPAP10,PAP10			down				up nitrate vs amm nitrate [9]; down 0N vs 15NO [5]
Potra2n14c26346	AT2G22620	Rhamnogalacturonate lyase family protein			down				up nitrate vs amm nitrate [9]; down 0N vs 15NO [5]
Potra2n10c22000	AT5G14420	RING domain ligase2|RGLG2		up					up nitrate vs amm nitrate [9]; down 0N vs 15NO [5]
Potra2n5c10760	AT1G09850	xylem bark cysteine peptidase 3|XBCP3		up					up nitrate vs amm nitrate [9]; down nit vs amm (phytozome data [27])
Potra2n7c15757	AT1G53570	mitogen-activated protein kinase kinase kinase 3|MAP3KA,MAPKKK3		up					up nitrate vs amm nitrate [9]; down nit vs amm (phytozome data [27])
Potra2n5c12314	AT1G53570	mitogen-activated protein kinase kinase kinase 3|MAP3KA,MAPKKK3		up					up nitrate vs amm nitrate [9]; down nit vs amm (phytozome data [27])
Potra2n13c26260	AT1G56700	Peptidase C15, pyroglutamyl peptidase I-like protein		down					up nitrate vs amm nitrate [9]; down nit vs amm (phytozome data [27])
Potra2n10c21315	AT1G68580	Agenet and bromo-adjacent homology (BAH) domain-containing protein		up				045min	up nitrate vs amm nitrate [9]; down nit vs amm (phytozome data [27])
Potra2n4c9829	AT2G21620	Adenine nucleotide alpha hydrolases-like superfamily protein|RD2		up					up nitrate vs amm nitrate [9]; down nit vs amm (phytozome data [27])
Potra2n5c12101	AT2G22010	related to KPC1|RKP	C2H2	up					up nitrate vs amm nitrate [9]; down nit vs amm (phytozome data [27])
Potra2n14c26592	AT2G26510	Xanthine/uracil permease family protein		up					up nitrate vs amm nitrate [9]; down nit vs amm (phytozome data [27])
Potra2n11c22914	AT3G14870	hypothetical protein (DUF641)		up					up nitrate vs amm nitrate [9]; down nit vs amm (phytozome data [27])
Potra2n10c21496	AT3G17860	jasmonate-zim-domain protein 3	TIFY	down					up nitrate vs amm nitrate [9]; down nit vs amm (phytozome data [27])
Potra2n14c26579	AT4G11800	Calcineurin-like metallo-phosphoesterase superfamily protein		up					up nitrate vs amm nitrate [9]; down nit vs amm (phytozome data [27])
Potra2n1c2646	AT4G34100	RING/U-box superfamily protein	C2H2	up					up nitrate vs amm nitrate [9]; down nit vs amm (phytozome data [27])
Potra2n7c16279	AT4G37030	membrane protein		up					up nitrate vs amm nitrate [9]; down nit vs amm (phytozome data [27])
Potra2n4c9973	AT4G38630	regulatory particle non-ATPase 10|ATMCB1,MBP1,MCB1,RPN10		down					up nitrate vs amm nitrate [9]; down nit vs amm (phytozome data [27])
Potra2n18c33182	AT5G24890	stress response NST1-like protein		up					up nitrate vs amm nitrate [9]; down nit vs amm (phytozome data [27])
Potra2n443s35696	AT5G63110	histone deacetylase 6|ATHDA6,AXE1,HDA6,RPD3B,RTS1,SIL1		up					up nitrate vs amm nitrate [9]; down nit vs amm (phytozome data [27])
Potra2n234s35052	AT5G63320	nuclear protein X1|NPX1	Bromodomain	up					up nitrate vs amm nitrate [9]; down nit vs amm (phytozome data [27])
Potra2n5c12062	AT5G64750	Integrase-type DNA-binding superfamily protein|ABR1	AP2	up		down			up nitrate vs amm nitrate [9]; down nit vs amm (phytozome data [27])
Potra2n1c3844	AT1G76520	Auxin efflux carrier family protein			up				up nitrate vs amm nitrate [9]; down nit vs amm (phytozome data [27]); DEG in response to external nitrate concentration in shoots [6]
Potra2n9c19054	AT2G16430	purple acid phosphatase 10|ATPAP10,PAP10			up	down			up nitrate vs amm nitrate [9]; down nit vs amm (phytozome data [27]); DEG [5]
Potra2n18c33016	AT1G30380	photosystem I subunit K|PSAK		down					up nitrate vs amm nitrate [9]; down nit vs amm (phytozome data [27]); up 0N vs 15NO [5]
Potra2n5c11847	AT5G42180	Peroxidase superfamily protein		down					up nitrate vs amm nitrate [9]; down nit vs amm (phytozome data [27]); up 0N vs 15NO [5]; DEG in response to external nitrate concentration in shoots [6]
Potra2n14c26606	AT5G42630	Homeodomain-like superfamily protein|ATS,KAN4	Homeodomain		down				up nitrate vs amm nitrate [9]; down nit vs amm (phytozome data [27]); up 0N vs 15NO [5]; DEG in response to external nitrate concentration in shoots [6]; First target of systemic signals is N uptake and metabolism, transient and early response [4, 15, 16, 17]
Potra2n1c1944	AT3G12490	cystatin B|ATCYS6,ATCYSB,CYSB		up					up nitrate vs amm nitrate [9]; up 0N vs 15NO [5]
Potra2n10c21465	AT1G23110	fold protein			down	down			up nitrate vs amm nitrate [9]; up nit vs amm (phytozome data [27])
Potra2n10c21924	AT1G24330	ARM repeat superfamily protein		up				None	up nitrate vs amm nitrate [9]; up nit vs amm (phytozome data [27])
Potra2n4c9974	AT2G16700	actin depolymerizing factor 5|ADF5,ATADF5		down					up nitrate vs amm nitrate [9]; up nit vs amm (phytozome data [27])
Potra2n1c3062	AT5G14760	L-aspartate oxidase|AO		up				015min	up nitrate vs amm nitrate [9]; up nit vs amm (phytozome data [27])
Potra2n12c24301	AT5G62500	end binding protein 1B|ATEB1,ATEB1B,EB1B			down				up nitrate vs amm nitrate [9]; up nit vs amm (phytozome data [27]); down 0N vs 15NO [5]
Potra2n9c18807	AT1G08230	Transmembrane amino acid transporter family protein		up					up nitrate vs amm nitrate [9]; up nit vs amm (phytozome data [27]); down 0N vs 15NO [5]; DEG in response to external nitrate concentration in shoots [6]
Potra2n5c11027	AT3G59080	Eukaryotic aspartyl protease family protein		up					up nit vs amm (phytozome data [27]); DEG [5, 33]
Potra2n14c27198	AT1G01050	pyrophosphorylase 1		up
Potra2n17c30644	AT1G01490	Heavy metal transport/detoxification superfamily protein			up
Potra2n14c26735	AT1G02170	metacaspase 1|AMC1,ATMC1,ATMCPB1,LOL3,MCP1B	Znf	up
Potra2n5c10924	AT1G03060	BEACH-DOMAIN HOMOLOG A1	WD40	up
Potra2n5c10936	AT1G03070	Bax inhibitor-1 family protein			up
Potra2n13c25134	AT1G03670	ankyrin repeat family protein			up
Potra2n7c15464	AT1G03770	RING 1B|ATRING1B,RING1B	C2H2		up
Potra2n5c10819	AT1G03920	Protein kinase family protein			down
Potra2n3c6887	AT1G04780	Ankyrin repeat family protein		up
Potra2n747s36676	AT1G05010	ethylene-forming enzyme|ACO4,EAT1,EFE			up
Potra2n19c33298	AT1G06890	nodulin MtN21 /EamA-like transporter family protein		up
Potra2n1c2429	AT1G07160	Protein phosphatase 2C family protein		up
Potra2n9c19862	AT1G07630	pol-like 5|PLL5		up
Potra2n18c32457	AT1G07660	Histone superfamily protein	Hap3/NF	down
Potra2n18c32460	AT1G07660	Histone superfamily protein	Hap3/NF	down
Potra2n8c17033	AT1G07660	Histone superfamily protein	Hap3/NF	down
Potra2n2c4406	AT1G07710	Ankyrin repeat family protein			up	down
Potra2n1c2023	AT1G07870	Protein kinase superfamily protein		up
Potra2n1c3775	AT1G08340	Rho GTPase activating protein with PAK-box/P21-Rho-binding domain-containing protein		down
Potra2n5c12784	AT1G09430	ATP-citrate lyase A-3|ACLA-3		down
Potra2n3c8387	AT1G09610	glucuronoxylan 4-O-methyltransferase-like protein (DUF579)		down
Potra2n3c8346	AT1G09800	Pseudouridine synthase family protein			up
Potra2n1c2551	AT1G10200	GATA type zinc finger transcription factor family protein	LIM	down	down	up
Potra2n8c17524	AT1G10630	ADP-ribosylation factor A1F|ARFA1F,ATARFA1F		down
Potra2n4c10334	AT1G10950	transmembrane nine 1|AtTMN1,TMN1		up
Potra2n4c8486	AT1G11860	Glycine cleavage T-protein family		down
Potra2n10c22018	AT1G12990	beta-1,4-N-acetylglucosaminyltransferase family protein		up
Potra2n10c21288	AT1G13260	related to ABI3/VP1 1|EDF4,RAV1	AP2	up					Nitrate-responsive [30]
Potra2n10c21211	AT1G13635	DNA glycosylase superfamily protein		down
Potra2n4c9506	AT1G13680	PLC-like phosphodiesterases superfamily protein			down
Potra2n18c32312	AT1G13950	eukaryotic elongation factor 5A-1|ATELF5A-1,EIF-5A,EIF5A,ELF5A-1		up
Potra2n10c21455	AT1G14990	transmembrane protein		down
Potra2n8c17773	AT1G15060	alpha/beta hydrolase family protein			down			None
Potra2n1c318	AT1G16170	ephrin-A3 protein		up	up
Potra2n1c1724	AT1G17550	homology to ABI2|HAB2			up
Potra2n12c24142	AT1G18040	cyclin-dependent kinase D1;3|AT;CDCKD;3,CAK2AT,CDKD1;3		up
Potra2n5c11718	AT1G19510	RAD-like 5|ATRL5,RL5,RSM4	MYB	up					Nitrate-responsive [30]
Potra2n420s35610	AT1G19780	cyclic nucleotide gated channel 8|ATCNGC8,CNGC8			down
Potra2n2c6373	AT1G20696	high mobility group B3|HMGB3,NFD03,NFD3	HMG	down
Potra2n2c5796	AT1G21170	Exocyst complex component SEC5|SEC5B		up
Potra2n17c31070	AT1G21280	Copia-like polyprotein/retrotransposon	CCHC(Zn)		down
Potra2n2c5754	AT1G21460	Nodulin MtN3 family protein			up
Potra2n5c11261	AT1G21740	DUF630 family protein, putative (DUF630 and DUF632)		up
Potra2n5c11357	AT1G22170	Phosphoglycerate mutase family protein		up	up
Potra2n5c11095	AT1G22770	gigantea protein (GI)|FB,GI		up
Potra2n8c18265	AT1G24330	ARM repeat superfamily protein		up
Potra2n81s34499	AT1G25275	thionin-like protein			up
Potra2n8c18264	AT1G27910	plant U-box 45|ATPUB45,PUB45		up
Potra2n4c8959	AT1G29270	transcription factor bHLH35-like protein		down
Potra2n11c23106	AT1G29350	RNA polymerase II degradation factor-like protein (DUF1296)		up
Potra2n11c23103	AT1G29790	S-adenosyl-L-methionine-dependent methyltransferases superfamily protein			down
Potra2n12c24701	AT1G31280	Argonaute family protein|AGO2	PAZ	up
Potra2n1c1145	AT1G32127	plant viral-response family protein		up
Potra2n1c3762	AT1G32930	Galactosyltransferase family protein			down	up
Potra2n13c25326	AT1G34420	leucine-rich repeat transmembrane protein kinase family protein		up
Potra2n2c5526	AT1G34780	APR-like 4|APRL4,ATAPRL4		up
Potra2n2c5324	AT1G49890	QWRF motif protein (DUF566)		up
Potra2n377s35475	AT1G50180	NB-ARC domain-containing disease resistance protein			down
Potra2n10c20448	AT1G50490	ubiquitin-conjugating enzyme 20|UBC20		up
Potra2n1c1595	AT1G52320	kinesin-like protein		up
Potra2n1c1591	AT1G52330	Late embryogenesis abundant (LEA) hydroxyproline-rich glycoprotein family			up
Potra2n6c15267	AT1G53430	Leucine-rich repeat transmembrane protein kinase			down	down
Potra2n8c18508	AT1G54610	Protein kinase superfamily protein		down
Potra2n5c12559	AT1G55020	lipoxygenase 1|ATLOX1,LOX1			up
Potra2n3c6533	AT1G55210	Disease resistance-responsive (dirigent-like protein) family protein		down
Potra2n1c94	AT1G55230	proteinase inhibitor I4, serpin (DUF716)			up
Potra2n1c4008	AT1G55680	Transducin/WD40 repeat-like superfamily protein		down
Potra2n1c679	AT1G56130	Leucine-rich repeat transmembrane protein kinase			up
Potra2n13c26212	AT1G56330	secretion-associated RAS 1B|ATSAR1,ATSAR1B,ATSARA1B,SAR1,SAR1B		down
Potra2n19c34034	AT1G58030	cationic amino acid transporter 2|CAT2		up
Potra2n1408s37052	AT1G58190	receptor like protein 9|AtRLP9,RLP9			up
Potra2n5c11517	AT1G58440	FAD/NAD(P)-binding oxidoreductase family protein|SQE1,XF1			up
Potra2n11c23381	AT1G61140	SNF2 domain-containing protein / helicase domain-containing protein / zinc finger protein-like protein|EDA16	C2H2	up
Potra2n11c23391	AT1G61330	FBD, F-box and Leucine Rich Repeat domains containing protein			up
Potra2n4c8639	AT1G61610	S-locus lectin protein kinase family protein			up
Potra2n11c23450	AT1G61667	serine protease, putative (Protein of unknown function, DUF538)		down
Potra2n7c15630	AT1G61730	DNA-binding storekeeper protein-related transcriptional regulator	GeBP		up				Transcriptional regulation in nitrate signaling [31]
Potra2n4c8596	AT1G61780	postsynaptic protein-like protein		down
Potra2n3c7256	AT1G64320	myosin heavy chain-like protein		up
Potra2n11c22512	AT1G64720	Polyketide cyclase/dehydrase and lipid transport superfamily protein|CP5		up
Potra2n4c9106	AT1G65840	polyamine oxidase 4|ATPAO4,PAO4		up
Potra2n18c32472	AT1G67090	ribulose bisphosphate carboxylase small chain 1A|RBCS1A		down
Potra2n234s35048	AT1G67580	Protein kinase superfamily protein		up
Potra2n10c21506	AT1G67920	hypothetical protein		up
Potra2n10c21337	AT1G68490	translocase subunit seca		up
Potra2n10c21253	AT1G68690	Protein kinase superfamily protein		up
Potra2n10c21255	AT1G68710	ATPase E1-E2 type family protein / haloacid dehalogenase-like hydrolase family protein		up
Potra2n8c17400	AT1G69580	Homeodomain-like superfamily protein	Homeodomain	down					Nitrate starvation signaling [34]
Potra2n10c21610	AT1G70260	nodulin MtN21 /EamA-like transporter family protein		up	up
Potra2n8c17976	AT1G70310	spermidine synthase 2|SPDS2		up
Potra2n8c18380	AT1G70370	polygalacturonase 2|PG2		up
Potra2n10c22052	AT1G70520	cysteine-rich RLK (RECEPTOR-like protein kinase) 2|CRK2		up
Potra2n10c22051	AT1G70530	cysteine-rich RLK (RECEPTOR-like protein kinase) 3		up
Potra2n6c13559	AT1G70600	Ribosomal protein L18e/L15 superfamily protein		up				090min
Potra2n10c21500	AT1G70670	Caleosin-related family protein		up
Potra2n13c25445	AT1G71520	Integrase-type DNA-binding superfamily protein	AP2	up					Nitrate signaling and transcriptional regulation [34]
Potra2n19c33630	AT1G71960	ATP-binding casette family G25|ABCG25,ATABCG25			down
Potra2n495s35812	AT1G71960	ATP-binding casette family G25|ABCG25,ATABCG25			down
Potra2n13c25349	AT1G71970	hypothetical protein		down
Potra2n1c1729	AT1G72810	Pyridoxal-5'-phosphate-dependent enzyme family protein		up				060min
Potra2n1490s37101	AT1G73240	nucleoporin protein Ndc1-Nup protein			up
Potra2n2c5810	AT1G74450	BPS1-like protein (DUF793)		down
Potra2n15c28661	AT1G74510	Galactose oxidase/kelch repeat superfamily protein		up
Potra2n11c23657	AT1G75800	Pathogenesis-related thaumatin superfamily protein		up
Potra2n2c5700	AT1G77300	histone-lysine N-methyltransferase|ASHH2,CCR1,EFS,SDG8	CW	up
Potra2n5c11311	AT1G77720	putative protein kinase 1|PPK1		down
Potra2n1c1543	AT1G80300	nucleotide transporter 1|ATNTT1,NTT1		up		down
Potra2n10c21426	AT2G01300	mediator of RNA polymerase II transcription subunit		up
Potra2n10c21425	AT2G01300	mediator of RNA polymerase II transcription subunit		up
Potra2n8c17819	AT2G01350	quinolinate phoshoribosyltransferase|QPT		down
Potra2n8c17983	AT2G02860	sucrose transporter 2|ATSUC3,ATSUT2,SUC3,SUT2		up
Potra2n10c21184	AT2G03720	Adenine nucleotide alpha hydrolases-like superfamily protein|MRH6			down
Potra2n13c25099	AT2G14830	Ist1p			down
Potra2n10c20602	AT2G16050	Cysteine/Histidine-rich C1 domain family protein			down
Potra2n10c20603	AT2G16050	Cysteine/Histidine-rich C1 domain family protein	PHD		up
Potra2n4c9878	AT2G16485	GW repeat- and PHD finger-containing protein NERD	SWIB	up
Potra2n4c9997	AT2G16920	ubiquitin-conjugating enzyme 23|PFU2,UBC23		up
Potra2n4c10054	AT2G17120	lysm domain GPI-anchored protein 2 precursor|LYM2			up
Potra2n9c18867	AT2G17120	lysm domain GPI-anchored protein 2 precursor|LYM2		up
Potra2n4c10218	AT2G17220	Protein kinase superfamily protein		up
Potra2n9c18661	AT2G17220	Protein kinase superfamily protein		up
Potra2n19c33557	AT2G17800	RAC-like 1|ARAC1,ATGP2,ATRAC1,ATROP3,ROP3		down
Potra2n6c13879	AT2G19880	Nucleotide-diphospho-sugar transferases superfamily protein		up
Potra2n4c9941	AT2G21120	magnesium transporter, putative (DUF803)		up
Potra2n4c9939	AT2G21130	Cyclophilin-like peptidyl-prolyl cis-trans isomerase family protein		down
Potra2n4c9841	AT2G21540	SEC14-like 3|ATSFH3,SFH3			down
Potra2n5c11114	AT2G21790	ribonucleotide reductase 1|ATRNR1,CLS8,R1,RNR1			down
Potra2n2c5318	AT2G23090	Uncharacterized protein family SERF		down
Potra2n7c16297	AT2G23620	methyl esterase 1|ATMES1,MES1		up
Potra2n3c6806	AT2G24100	ATP-dependent DNA helicase		up
Potra2n6c12893	AT2G24520	plasma membrane H+-ATPase		up
Potra2n18c33172	AT2G24610	cyclic nucleotide-gated channel 14|ATCNGC14,CNGC14			up	down
Potra2n266s35155	AT2G24765	ADP-ribosylation factor 3|ARF3,ARL1,ATARL1		down
Potra2n6c13118	AT2G25620	DNA-binding protein phosphatase 1			up
Potra2n6c13387	AT2G26310	Chalcone-flavanone isomerase family protein		up
Potra2n18c32655	AT2G26650	K+ transporter 1|AKT1,ATAKT1,KT1		up
Potra2n4c8905	AT2G27430	ARM repeat superfamily protein			up
Potra2n9c18691	AT2G27500	Glycosyl hydrolase superfamily protein		up
Potra2n9c18813	AT2G27830	hypothetical protein			up
Potra2n17c30845	AT2G28720	Histone superfamily protein	Hap3/NF	down
Potra2n1c2071	AT2G28890	poltergeist like 4|PLL4		up
Potra2n9c19849	AT2G29050	RHOMBOID-like 1|ATRBL1,RBL1		down
Potra2n13c26067	AT2G29150	NAD(P)-binding Rossmann-fold superfamily protein		up
Potra2n13c24987	AT2G30395	ovate family protein 17|ATOFP17,OFP17		down
Potra2n6c14777	AT2G31050	Cupredoxin superfamily protein		up
Potra2n9c19914	AT2G31930	hypothetical protein		down
Potra2n9c19916	AT2G31940	oxidoreductase/transition metal ion-binding protein		up
Potra2n3c6881	AT2G32670	vesicle-associated membrane protein 725|ATVAMP725,VAMP725		down
Potra2n1c2761	AT2G32830	phosphate transporter 1;5|PHT1;5,PHT5			up	down
Potra2n19c34121	AT2G33260	Tryptophan/tyrosine permease			down
Potra2n3c6993	AT2G33490	hydroxyproline-rich glycoprotein family protein		up
Potra2n5c10695	AT2G34430	light-harvesting chlorophyll-protein complex II subunit B1|LHB1B1,LHCB1.4		down
Potra2n11c22450	AT2G34790	FAD-binding Berberine family protein|EDA28,MEE23		up	down
Potra2n16c29905	AT2G36020	HVA22-like protein J|HVA22J			up
Potra2n16c30154	AT2G36720	Acyl-CoA N-acyltransferase with RING/FYVE/PHD-type zinc finger domain-containing protein	PHD	up
Potra2n16c30033	AT2G37050	Leucine-rich repeat protein kinase family protein		up
Potra2n16c30327	AT2G38250	Homeodomain-like superfamily protein	Homeodomain	up	up				Transcriptional regulation under nitrate [34]
Potra2n6c14448	AT2G38250	Homeodomain-like superfamily protein	Homeodomain	up					Transcriptional regulation under nitrate [34]
Potra2n4c8489	AT2G38300	myb-like HTH transcriptional regulator family protein	MYB		down				Metabolic and regulatory responses to nitrate [30]
Potra2n1c1268	AT2G38740	Haloacid dehalogenase-like hydrolase (HAD) superfamily protein		up	up	down
Potra2n1c2330	AT2G42280	basic helix-loop-helix (bHLH) DNA-binding superfamily protein	bHLH	up
Potra2n5c10864	AT2G42430	lateral organ boundaries-domain 16|ASL18,LBD16	AS2		down
Potra2n15c28463	AT2G42490	Copper amine oxidase family protein			up
Potra2n1c2007	AT2G44260	DUF946 family protein (DUF946)			up
Potra2n2c4483	AT2G44310	Calcium-binding EF-hand family protein		up
Potra2n2c5120	AT2G45130	SPX domain protein 3|ATSPX3,SPX3			up	down
Potra2n14c26808	AT2G45130	SPX domain protein 3|ATSPX3,SPX3			up
Potra2n14c26863	AT2G45410	LOB domain-containing protein 19|LBD19	AS2		down
Potra2n15c27977	AT2G46930	Pectinacetylesterase family protein		up
Potra2n4c9298	AT2G47485	hypothetical protein		up
Potra2n14c27478	AT2G47990	transducin family protein / WD-40 repeat family protein|EDA13,EDA19,SWA1			up
Potra2n4c9491	AT3G01090	SNF1 kinase homolog 10|AKIN10,KIN10,SNRK1.1		up				None
Potra2n4c9436	AT3G02360	6-phosphogluconate dehydrogenase family protein		up
Potra2n4c10374	AT3G02430	transmembrane protein, putative (DUF679)		up
Potra2n13c25637	AT3G03530	non-specific phospholipase C4|NPC4			up
Potra2n13c25821	AT3G04090	small and basic intrinsic protein 1A|SIP1;1,SIP1A		down
Potra2n13c25981	AT3G04890	adenine phosphoribosyltransferase-like protein, putative (DUF2358)			up	down
Potra2n1c1835	AT3G05200	RING/U-box superfamily protein|ATL6	C2H2		up
Potra2n13c26094	AT3G05290	peroxisomal adenine nucleotide carrier 1|PNC1		up
Potra2n2c4167	AT3G07330	Cellulose-synthase-like C6		up
Potra2n16c30305	AT3G09010	Protein kinase superfamily protein		up
Potra2n6c14573	AT3G09320	DHHC-type zinc finger family protein		up
Potra2n6c15061	AT3G10180	P-loop containing nucleoside triphosphate hydrolases superfamily protein			down	up
Potra2n13c24943	AT3G10860	Cytochrome b-c1 complex, subunit 8 protein		down
Potra2n10c20707	AT3G11320	Nucleotide-sugar transporter family protein		up
Potra2n8c17135	AT3G11430	glycerol-3-phosphate acyltransferase 5|ATGPAT5,GPAT5			up
Potra2n3c6674	AT3G13080	multidrug resistance-associated protein 3|ATMRP3,MRP3			up
Potra2n1c58	AT3G13600	calmodulin-binding family protein		up
Potra2n16c29697	AT3G13770	Pentatricopeptide repeat (PPR) superfamily protein			up
Potra2n1c1486	AT3G13840	GRAS family transcription factor	GRAS		up				Regulatory network responding to nitrate [34]
Potra2n2c4485	AT3G13960	growth-regulating factor 5|AtGRF5,GRF5	C3H	up					Nitrate-responsive [31]
Potra2n17c31814	AT3G15210	ethylene responsive element binding factor 4|ATERF-4,ATERF4,ERF4,RAP2.5	AP2	up
Potra2n18c32125	AT3G15760	cytochrome P450 family protein			up
Potra2n6c13102	AT3G15980	Coatomer, beta' subunit	WD40	up
Potra2n13c26189	AT3G16785	phospholipase D P1			up	down
Potra2n10c22296	AT3G16785	phospholipase D P1		up
Potra2n14c27240	AT3G17600	indole-3-acetic acid inducible 31|IAA31	AUX	down
Potra2n17c30608	AT3G17650	YELLOW STRIPE like 5|PDE321,YSL5		up
Potra2n15c28882	AT3G17920	Outer arm dynein light chain 1 protein		up
Potra2n10c21354	AT3G18295	DUF1639 family protein, putative (DUF1639)		up
Potra2n8c17375	AT3G19830	Calcium-dependent lipid-binding (CaLB domain) family protein		up
Potra2n9c19485	AT3G20090	cytochrome P450, family 705, subfamily A, polypeptide 18|CYP705A18			down			None
Potra2n1c3597	AT3G20640	basic helix-loop-helix (bHLH) DNA-binding superfamily protein		up
Potra2n6c15063	AT3G21250	multidrug resistance-associated protein 6			down
Potra2n8c18047	AT3G22590	PLANT HOMOLOGOUS TO PARAFIBROMIN|CDC73,PHP			down
Potra2n8c18075	AT3G22810	auxin canalization protein (DUF828)			down
Potra2n8c18093	AT3G22910	ATPase E1-E2 type family protein / haloacid dehalogenase-like hydrolase family protein		up
Potra2n5c10921	AT3G22930	calmodulin-like 11		up
Potra2n13c25901	AT3G23240	ethylene response factor 1|ATERF1,ERF1	AP2	up
Potra2n3c6894	AT3G24220	nine-cis-epoxycarotenoid dioxygenase 6|ATNCED6,NCED6			down
Potra2n18c32574	AT3G24550	proline extensin-like receptor kinase 1|ATPERK1,PERK1		up
Potra2n3c6873	AT3G24800	proteolysis 1|PRT1	LIM	up
Potra2n11c22562	AT3G25190	Vacuolar iron transporter (VIT) family protein			down
Potra2n19c34382	AT3G25810	Terpenoid cyclases/Protein prenyltransferases superfamily protein			up
Potra2n14c27570	AT3G26760	NAD(P)-binding Rossmann-fold superfamily protein			down
Potra2n507s35842	AT3G29075	glycine-rich protein		up
Potra2n17c31107	AT3G29400	exocyst subunit exo70 family protein E1|ATEXO70E1,EXO70E1			up
Potra2n9c18681	AT3G44510	alpha/beta-Hydrolases superfamily protein			up
Potra2n12c24348	AT3G48090	alpha/beta-Hydrolases superfamily protein|ATEDS1,EDS1		up
Potra2n12c24465	AT3G48310	cytochrome P450, family 71, subfamily A, polypeptide 22|CYP71A22			up
Potra2n15c29099	AT3G49220	Plant invertase/pectin methylesterase inhibitor superfamily		up
Potra2n5c11618	AT3G50560	NAD(P)-binding Rossmann-fold superfamily protein			up	down
Potra2n5c11696	AT3G50660	Cytochrome P450 superfamily protein			up
Potra2n7c16499	AT3G51120	zinc finger CCCH domain-containing protein 44	SWIB	up					Nitrate-responsive [34]
Potra2n14c26729	AT3G51290	pyridoxal-phosphate-dependent serine hydroxymethyltransferase, putative (DUF632)		down
Potra2n6c14449	AT3G51850	calcium-dependent protein kinase 13		up
Potra2n16c29874	AT3G52450	plant U-box 22|PUB22		up
Potra2n7c16489	AT3G54340	K-box region and MADS-box transcription factor family protein|AP3,ATAP3	MADS		down
Potra2n3c6715	AT3G54390	sequence-specific DNA binding transcription factor		up
Potra2n3c6694	AT3G54500	agglutinin-like protein			down
Potra2n2c6043	AT3G54650	RNI-like superfamily protein|FBL17		up
Potra2n1c2076	AT3G55430	O-Glycosyl hydrolases family 17 protein		up
Potra2n10c20659	AT3G55580	Regulator of chromosome condensation (RCC1) family protein		up
Potra2n13c25567	AT3G56230	BTB/POZ domain-containing protein	BTB	up
Potra2n6c15012	AT3G57220	Glycosyl transferase family 4 protein			down
Potra2n6c14936	AT3G57520	seed imbibition 2|AtSIP2,SIP2		up	up
Potra2n4c9185	AT3G59990	methionine aminopeptidase 2B|MAP2B		up
Potra2n1c1995	AT3G60080	RING/U-box superfamily protein	C2H2	down
Potra2n14c27117	AT3G61730	reduced male fertility|RMF	C2H2		down
Potra2n2c4701	AT3G62220	Protein kinase superfamily protein		up
Potra2n6c13197	AT3G63520	carotenoid cleavage dioxygenase 1|ATCCD1,ATNCED1,CCD1,NCED1			up
Potra2n2c5022	AT4G00720	shaggy-like protein kinase 32|ASKTHETA,ATSK32,SK32			down
Potra2n14c27241	AT4G01700	Chitinase family protein		up
Potra2n14c26669	AT4G01710	ARP2/3 complex 16 kDa subunit (p16-Arc)|ARPC5,CRK		down
Potra2n8c17515	AT4G01850	S-adenosylmethionine synthetase 2|AtSAM2,MAT2,SAM-2,SAM2		up
Potra2n14c27340	AT4G02110	transcription coactivator	PHD		up
Potra2n10c22236	AT4G02340	alpha/beta-Hydrolases superfamily protein		down
Potra2n2c4561	AT4G02400	U3 ribonucleoprotein (Utp) family protein		up				045min
Potra2n5c10985	AT4G02830	hypothetical protein			down	up
Potra2n2c5950	AT4G02830	hypothetical protein			up
Potra2n13c25157	AT4G03550	glucan synthase-like 5|ATGSL05,ATGSL5,GSL05,GSL5,PMR4		up
Potra2n16c29511	AT4G09550	AtGCP3 interacting protein 1|ATGIP1,GIP1		down
Potra2n6c15022	AT4G10620	P-loop containing nucleoside triphosphate hydrolases superfamily protein		down
Potra2n4c8622	AT4G11530	cysteine-rich RLK (RECEPTOR-like protein kinase) 34|CRK34		up	up
Potra2n16c29633	AT4G11550	Cysteine/Histidine-rich C1 domain family protein	PHD		up
Potra2n3c7384	AT4G11680	Zinc finger, C3HC4 type (RING finger) family protein	C2H2	up
Potra2n5c12431	AT4G14880	O-acetylserine (thiol) lyase (OAS-TL) isoform A1			up
Potra2n2c6200	AT4G16310	LSD1-like 3	Homeodomain	up
Potra2n6c15220	AT4G16380	Heavy metal transport/detoxification superfamily protein		down
Potra2n16c29414	AT4G16660	heat shock protein 70 (Hsp 70) family protein		up
Potra2n3c7818	AT4G17430	O-fucosyltransferase family protein	MYB	up
Potra2n8c17264	AT4G18640	Leucine-rich repeat protein kinase family protein|MRH1		up
Potra2n7c16466	AT4G18905	Transducin/WD40 repeat-like superfamily protein	WD40	up
Potra2n1c589	AT4G20300	Serine/Threonine-kinase, putative (DUF1639)		up
Potra2n19c33458	AT4G20970	basic helix-loop-helix (bHLH) DNA-binding superfamily protein	bHLH		up				Signaling or metabolic responses to nitrate [34]
Potra2n16c29346	AT4G21060	Galactosyltransferase family protein		up
Potra2n1c3594	AT4G21380	receptor kinase 3			up
Potra2n3c7734	AT4G21700	DUF2921 family protein, putative (DUF2921)			up
Potra2n4c8455	AT4G22120	ERD (early-responsive to dehydration stress) family protein		up
Potra2n3c7341	AT4G23340	2-oxoglutarate (2OG) and Fe(II)-dependent oxygenase superfamily protein			down	down
Potra2n2c5470	AT4G24580	Rho GTPase activation protein (RhoGAP) with PH domain-containing protein		up
Potra2n12c24749	AT4G25240	SKU5 similar 1		up
Potra2n9c18829	AT4G25490	C-repeat/DRE binding factor 1|ATCBF1,CBF1,DREB1B	AP2	up
Potra2n6c13236	AT4G26270	phosphofructokinase 3|PFK3		up
Potra2n1c3955	AT4G26540	Leucine-rich repeat receptor-like protein kinase family protein			down
Potra2n507s35843	AT4G26690	PLC-like phosphodiesterase family protein|GPDL2,MRH5,SHV3		up
Potra2n1c3583	AT4G27290	S-locus lectin protein kinase family protein		up	up	down
Potra2n426s35633	AT4G27460	Cystathionine beta-synthase (CBS) family protein		down	up
Potra2n17c31824	AT4G28390	ADP/ATP carrier 3|AAC3,ATAAC3		up
Potra2n2c6109	AT4G28530	NAC domain containing protein 74|anac074,NAC074	NAM		up
Potra2n18c32976	AT4G30380	Barwin-related endoglucanase			up
Potra2n6c13787	AT4G30440	UDP-D-glucuronate 4-epimerase 1|GAE1		up
Potra2n6c12839	AT4G31160	DDB1-CUL4 associated factor 1|DCAF1	LisH	up
Potra2n18c33103	AT4G31820	Phototropic-responsive NPH3 family protein		up
Potra2n9c19157	AT4G31940	cytochrome P450, family 82, subfamily C, polypeptide 4|CYP82C4			up
Potra2n18c32873	AT4G32810	carotenoid cleavage dioxygenase 8			down	up
Potra2n18c32867	AT4G32880	homeobox-leucine zipper protein ATHB-8|ATHB-8,ATHB8,HB-8	Homobox	up
Potra2n6c13323	AT4G33040	Thioredoxin superfamily protein		down	down	down
Potra2n19c34461	AT4G33420	Peroxidase superfamily protein			down
Potra2n7c15767	AT4G33440	Pectin lyase-like superfamily protein		up
Potra2n9c19263	AT4G34150	Calcium-dependent lipid-binding (CaLB domain) family protein		up
Potra2n4c9805	AT4G34480	O-Glycosyl hydrolases family 17 protein		up
Potra2n9c18945	AT4G35000	ascorbate peroxidase 3|APX3		down
Potra2n7c16427	AT4G36550	ARM repeat superfamily protein		up
Potra2n2c5385	AT4G37790	Homeobox-leucine zipper protein family|HAT22	Homobox	down
Potra2n4c9998	AT4G38550	phospholipase-like protein (PEARLI 4) family protein		up
Potra2n5c11119	AT4G39350	cellulose synthase(cesa) A2|ATCESA2,ATH-A,CESA2	PHD	up
Potra2n7c15856	AT4G40030	Histone superfamily protein	Hap3/NF	down
Potra2n2c6202	AT4G40040	Histone superfamily protein	Hap3/NF	down
Potra2n7c16512	AT4G40040	Histone superfamily protein	Hap3/NF	down
Potra2n16c30280	AT5G01225	josephin-like protein			up
Potra2n6c14438	AT5G01320	Thiamine pyrophosphate dependent pyruvate decarboxylase family protein			down
Potra2n16c30448	AT5G01750	LURP-one-like protein (DUF567)		up		down
Potra2n16c30553	AT5G01990	Auxin efflux carrier family protein		up
Potra2n6c14603	AT5G02420	cyclin-dependent kinase inhibitor SMR3-like protein			down	down
Potra2n9c19866	AT5G02440	60S ribosomal protein L36		down
Potra2n8c17104	AT5G02500	heat shock cognate protein 70-1|AT-HSC70-1,HSC70,HSC70-1,HSP70-1		up
Potra2n19c33346	AT5G03170	FASCICLIN-like arabinogalactan-protein 11|ATFLA11,FLA11			down
Potra2n819s36800	AT5G03680	Duplicated homeodomain-like superfamily protein|PTL			down
Potra2n6c14997	AT5G04170	Calcium-binding EF-hand family protein		up
Potra2n10c20416	AT5G04220	Calcium-dependent lipid-binding (CaLB domain) family protein|ATSYTC,NTMC2T1.3,NTMC2TYPE1.3,SYT3,SYTC			down
Potra2n8c16753	AT5G04930	aminophospholipid ATPase 1|ALA1		up		down
Potra2n10c20792	AT5G05480	Peptide-N4-(N-acetyl-beta-glucosaminyl)asparagine amidase A protein		up	up
Potra2n8c17188	AT5G05820	Nucleotide-sugar transporter family protein		up
Potra2n6c13537	AT5G06320	NDR1/HIN1-like 3|NHL3		up
Potra2n3c6548	AT5G06730	Peroxidase superfamily protein		up
Potra2n2c5528	AT5G09430	alpha/beta-Hydrolases superfamily protein			down
Potra2n7c15751	AT5G09760	Plant invertase/pectin methylesterase inhibitor superfamily		up
Potra2n5c10624	AT5G11880	Pyridoxal-dependent decarboxylase family protein		up
Potra2n6c13336	AT5G12010	nuclease		up
Potra2n18c32766	AT5G12010	nuclease		up
Potra2n6c14040	AT5G12080	mechanosensitive channel of small conductance-like 10|ATMSL10,MSL10		down
Potra2n9c19656	AT5G12850	CCCH-type zinc finger protein with ARM repeat domain-containing protein	C3H		down
Potra2n3c6614	AT5G12950	proline-tRNA ligase (DUF1680)			down	up
Potra2n154s34742	AT5G12950	proline-tRNA ligase (DUF1680)			up	up
Potra2n1c571	AT5G13870	xyloglucan endotransglucosylase/hydrolase 5		up
Potra2n17c31028	AT5G15720	GDSL-motif lipase 7|GLIP7		up
Potra2n17c31035	AT5G15740	O-fucosyltransferase family protein			down	up
Potra2n738s36638	AT5G15860	prenylcysteine methylesterase|ATPCME,PCME			up
Potra2n17c30987	AT5G15890	TRICHOME BIREFRINGENCE-LIKE 21|TBL21		up
Potra2n19c33972	AT5G16910	cellulose-synthase like D2|ATCSLD2,CSLD2		up
Potra2n13c25638	AT5G17600	RING/U-box superfamily protein	C2H2	up
Potra2n19c34129	AT5G18280	apyrase 2|APY2,ATAPY2		up
Potra2n6c13429	AT5G18520	Lung seven transmembrane receptor family protein		up
Potra2n10c22155	AT5G18980	ARM repeat superfamily protein			down
Potra2n8c18476	AT5G18980	ARM repeat superfamily protein			up
Potra2n18c32529	AT5G19690	staurosporin and temperature sensitive 3-like A		up
Potra2n18c32990	AT5G20060	alpha/beta-Hydrolases superfamily protein		up
Potra2n1c1515	AT5G20100	plant/protein		up
Potra2n6c14095	AT5G20790	transmembrane protein			up	down
Potra2n8c17994	AT5G22000	RING-H2 group F2A|RHF2A	C2H2	up
Potra2n4c10170	AT5G22250	Polynucleotidyl transferase, ribonuclease H-like superfamily protein		up
Potra2n3c8258	AT5G23570	XS domain-containing protein / XS zinc finger domain-containing protein-like protein			down	up
Potra2n681s36450	AT5G23570	XS domain-containing protein / XS zinc finger domain-containing protein-like protein			down	up
Potra2n127s34661	AT5G24080	Protein kinase superfamily protein			up
Potra2n12c23995	AT5G24090	chitinase A|ATCHIA,CHIA		up
Potra2n15c28993	AT5G24090	chitinase A|ATCHIA,CHIA		up
Potra2n4c8541	AT5G24620	Pathogenesis-related thaumatin superfamily protein		up
Potra2n13c26304	AT5G26670	Pectinacetylesterase family protein		up
Potra2n2c4590	AT5G26990	Drought-responsive family protein		up
Potra2n5c12570	AT5G27550	P-loop containing nucleoside triphosphate hydrolases superfamily protein		down
Potra2n18c32251	AT5G35160	Endomembrane protein 70 protein family		up
Potra2n7c15612	AT5G35730	EXS (ERD1/XPR1/SYG1) family protein		up
Potra2n12c24076	AT5G37490	ARM repeat superfamily protein		up
Potra2n4c9549	AT5G39670	Calcium-binding EF-hand family protein		up
Potra2n19c34199	AT5G40010	AAA-ATPase 1|AATP1		up	up
Potra2n13c25469	AT5G40910	Disease resistance protein (TIR-NBS-LRR class) family		up
Potra2n2c4957	AT5G41340	ubiquitin conjugating enzyme 4|ATUBC4,UBC4		up	up
Potra2n2c4042	AT5G42950	GYF domain-containing protein		up
Potra2n8c18152	AT5G43530	Helicase protein with RING/U-box domain-containing protein			down
Potra2n1c2361	AT5G43940	GroES-like zinc-binding dehydrogenase family protein|ADH2,ATGSNOR1,GSNOR,HOT5,PAR2			up
Potra2n650s36268	AT5G43940	GroES-like zinc-binding dehydrogenase family protein|ADH2,ATGSNOR1,GSNOR,HOT5,PAR2			up
Potra2n2c5816	AT5G44080	Basic-leucine zipper (bZIP) transcription factor family protein	bZIP	up
Potra2n12c24699	AT5G45110	NPR1-like protein 3	ABTB	up
Potra2n14c26737	AT5G47070	Protein kinase superfamily protein			up
Potra2n6c15346	AT5G47710	Calcium-dependent lipid-binding (CaLB domain) family protein		up
Potra2n19c33678	AT5G47850	CRINKLY4 related 4|CCR4		up
Potra2n14c27519	AT5G47920	transcription elongation factor		up
Potra2n8c17556	AT5G49520	WRKY DNA-binding protein 48|ATWRKY48,WRKY48	WRKY	up
Potra2n2c5397	AT5G49630	amino acid permease 6|AAP6			up
Potra2n2c5831	AT5G50080	ethylene response factor 110|ERF110	AP2	up	up
Potra2n12c24799	AT5G51770	Protein kinase superfamily protein		up
Potra2n3c6940	AT5G51920	Pyridoxal phosphate (PLP)-dependent transferases superfamily protein			down
Potra2n4c9079	AT5G52640	heat shock-like protein|ATHS83,AtHsp90-1,ATHSP90.1,HSP81-1,HSP81.1,HSP83,HSP90.1			up
Potra2n3c7268	AT5G53340	Galactosyltransferase family protein		up
Potra2n11c22735	AT5G54240	membrane lipoprotein lipid attachment site-like protein, putative (DUF1223)		down
Potra2n11c22682	AT5G54650	formin homology5|ATFH5,Fh5		up
Potra2n16c29236	AT5G56190	Transducin/WD40 repeat-like superfamily protein			down
Potra2n3c6472	AT5G56350	Pyruvate kinase family protein			down
Potra2n18c32068	AT5G57150	basic helix-loop-helix (bHLH) DNA-binding superfamily protein	bHLH	up	up				positively regulate nitrate uptake and assimilation and improves nitrogen-use efficiency [32]
Potra2n5c12665	AT5G57580	Calmodulin-binding protein		up		down
Potra2n13c24951	AT5G58300	Leucine-rich repeat protein kinase family protein		up
Potra2n1c2196	AT5G58620	zinc finger (CCCH-type) family protein	C3H	up					DEG [31]
Potra2n562s35963	AT5G59180	DNA-directed RNA polymerase II|NRPB7		down
Potra2n8c17090	AT5G59290	UDP-glucuronic acid decarboxylase 3|ATUXS3,UXS3		up
Potra2n799s36770	AT5G59790	UPSTREAM OF FLC protein (DUF966)		up	up
Potra2n13c25021	AT5G60490	FASCICLIN-like arabinogalactan-protein 12|FLA12			down
Potra2n4c10260	AT5G60490	FASCICLIN-like arabinogalactan-protein 12|FLA12			down
Potra2n3c7548	AT5G61480	Leucine-rich repeat protein kinase family protein|PXY		up
Potra2n15c28663	AT5G62500	end binding protein 1B|ATEB1,ATEB1B,EB1B		down
Potra2n15c28518	AT5G62960	UDP-N-acetylglucosamine-N-acetylmuramyl-pyrophosphoryl-undecaprenol N-acetylglucosamine protein			up
Potra2n12c24414	AT5G62960	UDP-N-acetylglucosamine-N-acetylmuramyl-pyrophosphoryl-undecaprenol N-acetylglucosamine protein			up
Potra2n5c10874	AT5G63450	cytochrome P450, family 94, subfamily B, polypeptide 1|CYP94B1		up
Potra2n15c28340	AT5G63460	SAP domain-containing protein	SAP	down
Potra2n11c23583	AT5G63520	F-box/LRR protein		up
Potra2n19c34361	AT5G63710	Leucine-rich repeat protein kinase family protein		down		down
Potra2n3c8264	AT5G64080	Bifunctional inhibitor/lipid-transfer protein/seed storage 2S albumin superfamily protein		down
Potra2n7c15863	AT5G65270	RAB GTPase homolog A4A|AtRABA4a,RABA4a		down
Potra2n5c11780	AT5G66270	Zinc finger C-x8-C-x5-C-x3-H type family protein	C3H	up
Potra2n5c11625	AT5G66850	mitogen-activated protein kinase kinase kinase 5|MAPKKK5			up
Potra2n203s34950	AT5G66900	Disease resistance protein (CC-NBS-LRR class) family			up
Potra2n871s36857	ATCG00800	structural constituent of ribosome		up
Potra2n7c16270			AP2	up
Potra2n1c1212					down	up
Potra2n12c24399					down	up
Potra2n7c15924					down
Potra2n8c17636					down
Potra2n699s36524					down
Potra2n10c21764					down
Potra2n6c13814					down
Potra2n5c12474					down
Potra2n3c7124				up	up
Potra2n1c3965					up	down
Potra2n7c15738					up
Potra2n15c29121					up
Potra2n6c14534					up
Potra2n1c1784				down
Potra2n10c20621				down
Potra2n3c8281				down
Potra2n10c20562				down
Potra2n4c8693				down
Potra2n1c1919				down
Potra2n11c23049				down
Potra2n12c24113				down
Potra2n14c26657				down
Potra2n14c27782				down
Potra2n16c29342				down
Potra2n1c2801				down
Potra2n4c9715				down
Potra2n5c11300				down
Potra2n7c16182				down
Potra2n8c17494				down
Potra2n1c3106				up		down
Potra2n19c33887				up
Potra2n12c24358				up
Potra2n19c34260				up
Potra2n19c34419				up
Potra2n8c17015				up
Potra2n9c19175				up
Potra2n5c10831				up
Potra2n13c25312				up
Potra2n18c32288				up
Potra2n10c20764				up
Potra2n10c22317				up
Potra2n13c25800				up
Potra2n14c26441				up
Potra2n14c26943				up
Potra2n14c27474				up
Potra2n16c29706				up
Potra2n18c32622				up
Potra2n19c33535				up
Potra2n19c34065				up
Potra2n1c3192				up
Potra2n1c3694				up
Potra2n2c4501				up
Potra2n2c5579				up
Potra2n4c9420				up
Potra2n4c9968				up
Potra2n5c10657				up
Potra2n5c11138				up
Potra2n5c11419				up
Potra2n600s36104				up
Potra2n6c13790				up
Potra2n703s36532				up
Potra2n751s36681				up
Potra2n8c16724				up
Potra2n8c17253				up
Potra2n9c19465				up
