# Supplementary material for: Xylem cells rapidly sense and respond to nitrate to promote expansion
Source: Research Square preprint supplement (doi:10.21203/rs.3.rs-7685028/v2), 2025-10-28
Supplement: Supplementary file 3 [file f2a75c793415ee86b5723a38.xlsx]

## Sheet: readme
Sheet Name	Description
S2A	Top 20 cluster-specific marker genes identified from single cell RNA-seq data of the control sample using Wilcox test in FindAllMarkers() function in Seurat package
S2B	List of genes shown in Figure 4B
S2C	Cluster specific Gene Ontology (GO) enrichment. padj or Benjamini- Hochberg p-adjusted values <0.01.
S2D	Number of cluster-specific cells in control and nitrate-treated sample
S2E	List of differentially expressed genes (False discovery rate or FDR<0.01 and log2 fold change >1.5) between nitrate treatment versus control from single cell RNA-seq of developing xylem from the Wilcox test in FindMarkers() function of seurat. Best Arabidopsis blast hit and description from UniProt and TAIR are shown. Here, a positive and negative log2 fold change means that the gene is up and do…
S2F	Overall and cluster-wise GO enrichment for the differentially expressed genes for nitrate versus control treatment from single cell RNA-seq data. q or Benjamini- Hochberg P-adjusted value <0.05.
S2G	Pseudotime genes for fiber and vessel development trajectory and their categorisation into modules as shown in Figure S3A-D
References
[1]	Tung C-C, Kuo S-C, Yang C-L, Yu J-H, Huang C-E, Liou P-C, et al. Single-cell transcriptomics unveils xylem cell development and evolution. Genome Biol. 2013,24:3.
[2]	Sundell D, Street NR, Kumar M, Mellerowicz EJ, Kucukoglu M, Johnsson C, et al. AspWood: high-spatial-resolution transcriptome profiles reveal uncharacterized modularity of wood formation in Populus tremula. Plant Cell. 2017;29:1585-1604.
[3]	Chen Y, Tong S, Jiang Y, Ai F, Feng Y, Zhang J, et al. Transcriptional landscape of highly lignified poplar stems at single-cell resolution. Genome Biol. 2021;22:319.
[4]	Kucukoglu M, Nilsson J, Zheng B, Chaabouni S, Nilsson O. WUSCHEL‐RELATED HOMEOBOX 4 (WOX 4)‐like genes regulate cambial cell division activity and secondary growth in Populus trees. New Phytol. 2017;215:642-657.
[5]	Du J, Wang Y, Chen W, Xu M, Zhou R, Shou H, et al. High-resolution anatomical and spatial transcriptome analyses reveal two types of meristematic cell pools within the secondary vascular tissue of poplar stem. Mol Plant. 2023,16:809-828.
[6]	Shi R, Sun Y-H, Li Q, Heber S, Sederoff R, Chiang VL. Towards a systems approach for lignin biosynthesis in Populus trichocarpa: transcript abundance and specificity of the monolignol biosynthetic genes. Plant Cell Physiol. 2010;51:144-163.
[7]	Conde D, Triozzi PM, Pereira WJ, Schmidt HW, Balmant KM, Knaack SA, et al. Single-nuclei transcriptome analysis of the shoot apex vascular system differentiation in Populus. Development. 2021,149:dev200632.
[8]	Haghighat M, Zhong R, Ye Z-H. WUSCHEL-RELATED HOMEOBOX genes are crucial for normal vascular organization and wood formation in poplar. Plant Sci. 2024;346:112138.
[9]	Gutierrez C. The Arabidopsis cell division cycle. The Arabidopsis Book/American Society of Plant Biologists. 2009;7:e0120.
[10]	Zhang T-Q, Chen Y, Wang J-W. A single-cell analysis of the Arabidopsis vegetative shoot apex. Dev Cell. 2021;56:1056-1074. e1058.
[11]	Zhang B, Sztojka B, Escamez S, Vanholme R, Hedenström M, Wang Y, et al. PIRIN2 suppresses S‐type lignin accumulation in a noncell‐autonomous manner in Arabidopsis xylem elements. New Phytol. 2020;225:1923-1935.

## Sheet: S2A
GeneID	Average_log2_fold_change	pct.1	pct.2	False Discovery Rate	Cluster number	Best Arabidospis hit	TAIR_Description
Potra2n16c29342	1.74924	0.931	0.711	0	1
Potra2n4c8828	1.29904	0.824	0.415	0	1
Potra2n5c11138	1.31762	0.772	0.344	0	1
Potra2n9c19327	1.32867	0.833	0.52	0	1
Potra2n14c27157	1.40071	0.472	0.103	0	1	AT1G01200	RAB GTPase homolog A3|ATRAB-A3,ATRABA3,RABA3
Potra2n1c2551	1.65456	0.743	0.333	0	1	AT1G10200	GATA type zinc finger transcription factor family protein
Potra2n10c21489	1.47614	0.714	0.291	0	1	AT1G14890	Plant invertase/pectin methylesterase inhibitor superfamily protein
Potra2n14c27680	1.35195	0.419	0.077	0	1	AT1G62370	RING/U-box superfamily protein
Potra2n4c9675	1.71068	0.583	0.171	0	1	AT1G72160	Sec14p-like phosphatidylinositol transfer family protein
Potra2n9c18955	1.83586	0.623	0.197	0	1	AT2G16700	actin depolymerizing factor 5|ADF5,ATADF5
Potra2n9c18656	1.4921	0.573	0.153	0	1	AT2G17230	EXORDIUM like 5|EXL5
Potra2n1c2087	1.34634	0.719	0.337	0	1	AT2G28950	expansin A6|ATEXP6,ATEXPA6,ATHEXP ALPHA 1.8,EXPA6
Potra2n6c14289	1.52409	0.727	0.247	0	1	AT2G36570	Leucine-rich repeat protein kinase family protein
Potra2n19c33967	1.76973	0.748	0.245	0	1	AT2G40480	WEB family protein (DUF827)
Potra2n16c29640	1.36344	0.646	0.257	0	1	AT3G12110	actin-11|ACT11
Potra2n8c16805	1.96446	0.908	0.373	0	1	AT3G54260	TRICHOME BIREFRINGENCE-LIKE 36|TBL36
Potra2n14c26873	1.33956	0.544	0.188	0	1	AT3G60900	FASCICLIN-like arabinogalactan-protein 10|FLA10
Potra2n19c33327	1.93915	0.827	0.298	0	1	AT4G03210	xyloglucan endotransglucosylase/hydrolase 9|XTH9
Potra2n12c24490	1.5372	0.413	0.097	0	1	AT4G24780	Pectin lyase-like superfamily protein
Potra2n17c31199	2.07416	0.869	0.443	0	1	AT5G15230	GAST1 protein homolog 4|GASA4
Potra2n3c7241	1.87427	0.756	0.28	0	2
Potra2n19c33920	1.92951	0.754	0.323	0	2	AT1G08450	calreticulin 3|AtCRT3,CRT3,EBS2,PSL1
Potra2n8c17356	1.91986	0.944	0.555	0	2	AT1G54320	LEM3 (ligand-effect modulator 3) family protein / CDC50 family protein
Potra2n8c17640	1.91404	0.903	0.468	0	2	AT1G68710	ATPase E1-E2 type family protein / haloacid dehalogenase-like hydrolase family protein
Potra2n5c11107	2.21774	0.966	0.666	0	2	AT1G71695	Peroxidase superfamily protein
Potra2n2c5697	2.72454	0.966	0.629	0	2	AT1G77380	amino acid permease 3|AAP3,ATAAP3
Potra2n6c14859	1.73942	0.818	0.322	0	2	AT2G12400	plasma membrane fusion protein
Potra2n4c9970	2.03926	0.738	0.307	0	2	AT2G16660	Major facilitator superfamily protein
Potra2n6c14433	1.80107	0.823	0.439	0	2	AT2G38290	ammonium transporter 2|AMT2,AMT2;1,ATAMT2
Potra2n1c1161	1.81734	0.787	0.304	0	2	AT3G03050	cellulose synthase(cesa)-like D3|ATCSLD3,CSLD3,KJK
Potra2n8c18093	1.86407	0.657	0.307	0	2	AT3G22910	ATPase E1-E2 type family protein / haloacid dehalogenase-like hydrolase family protein
Potra2n8c17115	2.23894	0.998	0.786	0	2	AT3G55430	O-Glycosyl hydrolases family 17 protein
Potra2n14c27025	1.76763	0.963	0.618	0	2	AT4G00300	receptor-like kinase
Potra2n2c5377	1.73454	0.861	0.387	0	2	AT4G07960	Cellulose-synthase-like C12
Potra2n4c8455	1.95205	0.855	0.401	0	2	AT4G22120	ERD (early-responsive to dehydration stress) family protein
Potra2n2c5261	1.99767	0.616	0.244	0	2	AT4G25000	alpha-amylase-like protein|AMY1,ATAMY1
Potra2n2c5308	1.77137	0.792	0.397	0	2	AT4G37400	cytochrome P450, family 81, subfamily F, polypeptide 3|CYP81F3
Potra2n9c18880	2.31471	0.991	0.774	0	2	AT4G38400	expansin-like A2|ATEXLA2,ATEXPL2,ATHEXP BETA 2.2,EXLA2,EXPL2
Potra2n12c24758	1.71666	0.821	0.521	0	2	AT5G62350	Plant invertase/pectin methylesterase inhibitor superfamily protein
Potra2n5c10874	2.26269	0.965	0.648	0	2	AT5G63450	cytochrome P450, family 94, subfamily B, polypeptide 1|CYP94B1
Potra2n18c32288	2.45558	0.997	0.407	0	3
Potra2n2c4046	0.864189	0.846	0.59	1.55504e-213	3
Potra2n2c6336	0.80833	0.658	0.435	9.00491e-127	3
Potra2n14c26690	0.939615	0.393	0.169	3.25242e-145	3	AT1G02120	GRAM domain family protein
Potra2n5c12437	0.837553	0.393	0.187	7.09653e-119	3	AT1G08720	Protein kinase superfamily protein
Potra2n5c12314	1.22448	0.793	0.485	3.83067e-298	3	AT1G53570	mitogen-activated protein kinase kinase kinase 3|MAP3KA,MAPKKK3
Potra2n234s35048	0.836818	0.599	0.379	4.97744e-124	3	AT1G67580	Protein kinase superfamily protein
Potra2n1c3303	0.818464	0.682	0.443	5.41371e-140	3	AT1G78440	gibberellin 2-beta-dioxygenase|ATGA2OX1,GA2OX1
Potra2n4c9970	0.61907	0.574	0.326	4.78252e-120	3	AT2G16660	Major facilitator superfamily protein
Potra2n16c30154	0.976967	0.337	0.12	9.07215e-164	3	AT2G36720	Acyl-CoA N-acyltransferase with RING/FYVE/PHD-type zinc finger domain-containing protein
Potra2n16c30327	1.16301	0.739	0.412	2.20184e-265	3	AT2G38250	Homeodomain-like superfamily protein
Potra2n6c14433	0.964731	0.796	0.443	2.43202e-272	3	AT2G38290	ammonium transporter 2|AMT2,AMT2;1,ATAMT2
Potra2n14c26986	0.920699	0.449	0.231	2.67838e-121	3	AT2G45880	beta-amylase 7|BAM7,BMY4
Potra2n2c4453	0.95338	0.381	0.158	4.50774e-148	3	AT3G21630	chitin elicitor receptor kinase 1|CERK1,LYSM RLK1
Potra2n10c21313	0.888137	0.437	0.214	9.27649e-126	3	AT3G25840	Protein kinase superfamily protein
Potra2n14c27223	0.94097	0.493	0.253	3.37242e-140	3	AT3G62010	metal ion-binding protein
Potra2n2c6200	0.866407	0.385	0.181	1.18733e-120	3	AT4G16310	LSD1-like 3
Potra2n4c10480	1.10567	0.443	0.181	2.06833e-191	3	AT4G19210	RNAse l inhibitor protein 2|ATRLI2,RLI2
Potra2n18c32663	1.13045	0.387	0.144	7.07212e-193	3	AT5G20070	nudix hydrolase homolog 19|ATNUDT19,ATNUDX19,NUDX19
Potra2n5c12062	0.751891	0.859	0.639	6.90014e-178	3	AT5G64750	Integrase-type DNA-binding superfamily protein|ABR1
Potra2n10c21258	2.38987	0.778	0.259	0	4
Potra2n1c546	1.98135	0.562	0.156	0	4	AT1G27440	Exostosin family protein|ATGUT1,GUT2,IRX10
Potra2n10c21497	2.50258	0.753	0.16	0	4	AT2G01660	plasmodesmata-located protein 6|PDLP6
Potra2n4c10271	2.03656	0.813	0.315	0	4	AT2G28315	Nucleotide/sugar transporter family protein
Potra2n9c18755	2.0594	0.482	0.114	0	4	AT2G29130	laccase 2|ATLAC2,LAC2
Potra2n1c3105	1.98289	0.869	0.383	0	4	AT2G34410	O-acetyltransferase family protein
Potra2n6c14486	2.29902	0.654	0.205	0	4	AT2G38080	Laccase/Diphenol oxidase family protein|ATLMCO4,IRX12,LAC4,LMCO4
Potra2n10c20806	2.02266	0.808	0.463	0	4	AT2G40370	laccase 5|LAC5
Potra2n1c3521	2.07857	0.938	0.595	0	4	AT3G15480	fiber (DUF1218)
Potra2n10c21170	2.49836	0.967	0.709	0	4	AT3G16920	chitinase-like protein
Potra2n7c15752	2.02051	0.588	0.113	0	4	AT3G18660	plant glycogenin-like starch initiation protein 1|GUX1,PGSIP1
Potra2n8c17245	2.15859	0.841	0.31	0	4	AT3G55990	trichome birefringence-like protein (DUF828)|ESK1,TBL29
Potra2n4c8952	2.01462	0.774	0.229	0	4	AT4G18780	cellulose synthase(cesa) family protein|ATCESA8,CESA8,IRX1,LEW2
Potra2n6c14180	2.60605	0.94	0.487	0	4	AT5G03170	FASCICLIN-like arabinogalactan-protein 11|ATFLA11,FLA11
Potra2n18c32805	2.3321	0.763	0.179	0	4	AT5G11890	harpin-induced protein
Potra2n6c13307	2.29257	0.814	0.255	0	4	AT5G11890	harpin-induced protein
Potra2n15c28689	2.4918	0.895	0.355	0	4	AT5G15630	COBRA-like extracellular glycosyl-phosphatidyl inositol-anchored protein family
Potra2n17c30674	2.0847	0.835	0.448	0	4	AT5G37478	TPX2 (targeting protein for Xklp2) protein family
Potra2n2c4078	2.25088	0.825	0.288	0	4	AT5G44030	cellulose synthase(cesa) A4|CESA4,IRX5,NWS2
Potra2n15c28115	2.38476	0.976	0.688	0	4	AT5G60490	FASCICLIN-like arabinogalactan-protein 12|FLA12
Potra2n5c11003	0.967208	0.429	0.137	8.77922e-209	5	AT1G06680	photosystem II subunit P-1|OE23,OEE2,PSBP-1,PSII-P
Potra2n6c13067	1.06293	0.374	0.078	0	5	AT1G30380	photosystem I subunit K|PSAK
Potra2n3c8005	1.17859	0.554	0.222	3.44696e-223	5	AT1G52230	photosystem I subunit H2|PSAH-2,PSAH2,PSI-H
Potra2n5c12725	1.24581	0.623	0.286	1.95159e-226	5	AT1G56580	plant/protein (Protein of unknown function, DUF538)|SVB
Potra2n14c27801	1.02513	0.409	0.122	1.70231e-219	5	AT1G61520	PSI type III chlorophyll a/b-binding protein|LHCA3
Potra2n4c8449	1.10698	0.538	0.213	8.16468e-216	5	AT1G62360	KNOX/ELK homeobox transcription factor|BUM,BUM1,SHL,STM,WAM,WAM1
Potra2n3c6926	1.74653	0.686	0.253	0	5	AT1G67360	Rubber elongation factor protein (REF)
Potra2n2c4118	1.22499	0.495	0.162	1.4538e-258	5	AT2G20260	photosystem I subunit E-2|PSAE-2
Potra2n13c25934	1.12449	0.69	0.356	9.35881e-218	5	AT3G04730	indoleacetic acid-induced protein 16|IAA16
Potra2n16c30479	0.921076	0.27	0.055	6.06513e-227	5	AT3G10960	AZA-guanine resistant1|ATAZG1,AZG1
Potra2n9c19477	1.45456	0.898	0.548	0	5	AT3G12610	Leucine-rich repeat (LRR) family protein|DRT100
Potra2n10c21086	1.18495	0.443	0.152	2.15922e-207	5	AT3G17210	heat stable protein 1
Potra2n7c16335	1.15199	0.454	0.134	1.59612e-264	5	AT3G50820	photosystem II subunit O-2|OEC33,PSBO-2,PSBO2
Potra2n3c6944	1.05121	0.406	0.101	5.9626e-281	5	AT3G61470	photosystem I light harvesting complex protein|LHCA2
Potra2n19c33855	1.08012	0.611	0.265	1.20675e-218	5	AT4G10340	light harvesting complex of photosystem II 5|LHCB5
Potra2n14c27834	1.10664	0.498	0.178	1.76065e-222	5	AT4G12800	photosystem I subunit l|PSAL
Potra2n16c30308	1.01844	0.329	0.065	1.60674e-290	5	AT5G01530	light harvesting complex photosystem II|LHCB4.1
Potra2n18c33011	1.14451	0.337	0.054	0	5	AT5G11190	Integrase-type DNA-binding superfamily protein|SHN3
Potra2n6c14040	1.27134	0.576	0.231	8.27558e-242	5	AT5G12080	mechanosensitive channel of small conductance-like 10|ATMSL10,MSL10
Potra2n3c7062	1.49339	0.656	0.326	5.10448e-207	5	AT5G13870	xyloglucan endotransglucosylase/hydrolase 5
Potra2n6c14728	1.71255	0.454	0.113	0	6
Potra2n8c17900	1.9779	0.778	0.433	0	6	AT1G14720	xyloglucan endotransglucosylase/hydrolase 28|ATXTH28,EXGT-A2,XTH28,XTR2
Potra2n12c24607	1.68728	0.471	0.118	0	6	AT1G28110	serine carboxypeptidase-like 45|SCPL45
Potra2n5c10753	2.69466	0.735	0.317	0	6	AT1G75500	Walls Are Thin 1|WAT1
Potra2n14c27708	2.05867	0.665	0.18	0	6	AT2G04850	Auxin-responsive family protein
Potra2n9c19384	1.96579	0.361	0.065	0	6	AT2G14620	xyloglucan endotransglucosylase/hydrolase 10
Potra2n4c9964	1.91485	0.456	0.068	0	6	AT2G21050	like AUXIN RESISTANT 2|LAX2
Potra2n10c20736	2.19897	0.649	0.135	0	6	AT2G38120	Transmembrane amino acid transporter family protein
Potra2n19c33517	1.90682	0.709	0.289	0	6	AT2G42570	TRICHOME BIREFRINGENCE-LIKE 39|TBL39
Potra2n4c9142	1.69354	0.51	0.124	0	6	AT3G03220	expansin A13|ATEXP13,ATEXPA13,ATHEXP ALPHA 1.22,EXP13,EXPA13
Potra2n9c19454	2.01972	0.576	0.119	0	6	AT3G08490	delta-latroinsectotoxin-Lt1a protein
Potra2n9c19962	1.64713	0.359	0.065	0	6	AT3G44220	Late embryogenesis abundant (LEA) hydroxyproline-rich glycoprotein family
Potra2n10c20549	1.91754	0.65	0.249	0	6	AT4G01470	tonoplast intrinsic protein 1;3|ATTIP1.3,GAMMA-TIP3,TIP1;3
Potra2n8c18156	1.9226	0.819	0.515	0	6	AT4G14420	HR-like lesion-inducing protein-like protein
Potra2n4c10039	1.94262	0.722	0.32	0	6	AT4G38400	expansin-like A2|ATEXLA2,ATEXPL2,ATHEXP BETA 2.2,EXLA2,EXPL2
Potra2n16c30506	2.11181	0.663	0.184	0	6	AT5G01890	Leucine-rich receptor-like protein kinase family protein
Potra2n17c30987	2.463	0.74	0.24	0	6	AT5G15890	TRICHOME BIREFRINGENCE-LIKE 21|TBL21
Potra2n8c18011	2.2682	0.737	0.329	0	6	AT5G26330	Cupredoxin superfamily protein
Potra2n17c31267	2.6031	0.68	0.298	0	6	AT5G40020	Pathogenesis-related thaumatin superfamily protein
Potra2n14c27856	1.90653	0.41	0.058	0	6	AT5G48900	Pectin lyase-like superfamily protein
Potra2n2c4675	1.18171	0.304	0.039	0	7	AT1G09390	GDSL-like Lipase/Acylhydrolase superfamily protein
Potra2n2c5467	2.15442	0.788	0.247	0	7	AT1G09750	Eukaryotic aspartyl protease family protein
Potra2n1c90	2.45564	0.914	0.57	0	7	AT1G55260	Bifunctional inhibitor/lipid-transfer protein/seed storage 2S albumin superfamily protein
Potra2n1c1049	2.4198	0.98	0.755	0	7	AT1G62510	Bifunctional inhibitor/lipid-transfer protein/seed storage 2S albumin superfamily protein
Potra2n1c338	1.21794	0.325	0.044	0	7	AT1G79720	Eukaryotic aspartyl protease family protein
Potra2n8c17849	1.64488	0.587	0.149	0	7	AT2G01610	Plant invertase/pectin methylesterase inhibitor superfamily protein
Potra2n3c8020	1.90276	0.506	0.104	0	7	AT3G16240	delta tonoplast integral protein|AQP1,ATTIP2;1,DELTA-TIP,DELTA-TIP1,TIP2;1
Potra2n8c17549	1.07715	0.257	0.029	0	7	AT3G17130	Plant invertase/pectin methylesterase inhibitor superfamily protein
Potra2n9c19123	1.37106	0.302	0.031	0	7	AT3G18830	polyol/monosaccharide transporter 5|ATPLT5,ATPMT5,PMT5
Potra2n16c29368	1.5692	0.511	0.128	0	7	AT3G22142	Bifunctional inhibitor/lipid-transfer protein/seed storage 2S albumin superfamily protein
Potra2n4c10139	1.8289	0.594	0.114	0	7	AT3G43720	Bifunctional inhibitor/lipid-transfer protein/seed storage 2S albumin superfamily protein
Potra2n2c4942	2.91618	0.915	0.4	0	7	AT3G61490	Pectin lyase-like superfamily protein
Potra2n8c17208	1.68653	0.889	0.506	0	7	AT4G00430	plasma membrane intrinsic protein 1;4|PIP1;4,PIP1E,TMP-C
Potra2n2c6010	1.2175	0.374	0.063	0	7	AT4G02670	indeterminate(ID)-domain 12
Potra2n18c32429	2.19613	0.626	0.133	0	7	AT4G25780	CAP (Cysteine-rich secretory proteins, Antigen 5, and Pathogenesis-related 1 protein) superfamily protein
Potra2n4c9969	1.96583	0.643	0.134	0	7	AT4G38650	Glycosyl hydrolase family 10 protein
Potra2n3c6548	1.66657	0.564	0.119	0	7	AT5G06730	Peroxidase superfamily protein
Potra2n1c232	2.9984	0.865	0.398	0	7	AT5G07030	Eukaryotic aspartyl protease family protein
Potra2n3c6983	0.896063	0.246	0.029	4.87876e-300	7	AT5G13140	Pollen Ole e 1 allergen and extensin family protein
Potra2n2c4144	2.76504	0.974	0.718	0	7	AT5G48485	Bifunctional inhibitor/lipid-transfer protein/seed storage 2S albumin superfamily protein|DIR1
Potra2n10c20668	0.930843	0.704	0.34	4.94397e-133	8
Potra2n10c21448	1.04435	0.664	0.29	1.38159e-143	8
Potra2n355s35383	0.856471	0.382	0.114	5.32593e-143	8
Potra2n8c17822	1.32076	0.732	0.291	7.01213e-227	8
Potra2n1c3834	1.01503	0.482	0.153	2.22418e-176	8	AT1G33265	Transmembrane proteins 14C
Potra2n7c16473	0.747619	0.453	0.145	4.03453e-149	8	AT1G75440	ubiquitin-conjugating enzyme 16|UBC16
Potra2n9c18987	0.894604	0.675	0.277	2.92875e-154	8	AT2G21180	transmembrane protein
Potra2n2c6093	1.41926	0.979	0.724	2.27088e-251	8	AT2G31200	actin depolymerizing factor 6|ADF6,ATADF6
Potra2n16c30276	0.643892	0.275	0.068	9.24432e-130	8	AT2G38090	Duplicated homeodomain-like superfamily protein
Potra2n16c29896	1.26358	0.959	0.648	1.15866e-204	8	AT3G11660	NDR1/HIN1-like 1|NHL1
Potra2n6c13538	1.50486	0.58	0.145	0	8	AT3G11660	NDR1/HIN1-like 1|NHL1
Potra2n1c3204	1.26998	0.971	0.742	2.79755e-163	8	AT3G13130	transmembrane protein
Potra2n10c21919	0.83019	0.372	0.101	2.1536e-160	8	AT3G27210	hypothetical protein
Potra2n9c19887	0.960518	0.919	0.602	2.9615e-150	8	AT3G46060	RAB GTPase homolog 8A|ARA-3,ARA3,ATRAB8A,ATRABE1C,RAB8A
Potra2n6c15220	1.19008	0.679	0.291	7.83094e-175	8	AT4G16380	Heavy metal transport/detoxification superfamily protein
Potra2n1c749	1.17134	0.43	0.099	2.96672e-248	8	AT4G23920	UDP-D-glucose/UDP-D-galactose 4-epimerase 2|ATUGE2,UGE2
Potra2n6c13057	1.9703	0.758	0.324	2.49277e-246	8	AT4G32280	indole-3-acetic acid inducible 29
Potra2n2c4880	0.761443	0.444	0.145	1.25881e-141	8	AT5G53200	Homeodomain-like superfamily protein|TRY
Potra2n15c28663	1.12078	0.473	0.135	1.38371e-207	8	AT5G62500	end binding protein 1B|ATEB1,ATEB1B,EB1B
Potra2n12c24567	0.944614	0.478	0.154	1.33428e-163	8	AT5G63530	farnesylated protein 3|ATFP3,FP3
Potra2n18c32288	0.862	0.99	0.439	2.5462e-184	9
Potra2n2c4046	1.32793	0.958	0.599	2.13113e-213	9
Potra2n2c6444	0.930105	0.4	0.073	7.07485e-236	9
Potra2n7c16402	1.1555	0.878	0.437	2.99372e-176	9
Potra2n14c26690	1.06402	0.556	0.174	8.89841e-170	9	AT1G02120	GRAM domain family protein
Potra2n4c10323	1.05358	0.591	0.185	1.48693e-182	9	AT1G22930	T-complex protein 11
Potra2n10c21069	1.22522	0.779	0.324	1.44263e-185	9	AT2G22300	signal responsive 1|CAMTA3,SR1
Potra2n9c18721	1.22974	0.639	0.195	1.13118e-216	9	AT2G27350	OTU-like cysteine protease family protein
Potra2n14c26986	1.45646	0.744	0.229	1.04384e-277	9	AT2G45880	beta-amylase 7|BAM7,BMY4
Potra2n8c17540	1.15104	0.776	0.332	7.34716e-169	9	AT3G06500	Plant neutral invertase family protein
Potra2n2c4156	1.22084	0.821	0.372	9.94323e-183	9	AT3G07400	lipase class 3 family protein
Potra2n8c17598	1.19485	0.623	0.2	8.00668e-192	9	AT3G16940	calmodulin-binding transcription activator
Potra2n10c21313	1.12819	0.679	0.215	7.16566e-209	9	AT3G25840	Protein kinase superfamily protein
Potra2n5c11091	1.33111	0.868	0.402	1.90146e-217	9	AT4G09760	Protein kinase superfamily protein
Potra2n4c10480	1.12984	0.586	0.188	9.17183e-170	9	AT4G19210	RNAse l inhibitor protein 2|ATRLI2,RLI2
Potra2n17c30920	1.05167	0.567	0.154	4.62631e-208	9	AT5G16120	alpha/beta-Hydrolases superfamily protein
Potra2n18c32844	1.1976	0.549	0.138	2.2388e-231	9	AT5G21930	P-type ATPase of Arabidopsis 2
Potra2n6c13284	0.995333	0.588	0.187	4.9439e-170	9	AT5G26040	histone deacetylase 2|HDA2
Potra2n4c9205	1.12269	0.724	0.277	2.8178e-182	9	AT5G37710	alpha/beta-Hydrolases superfamily protein
Potra2n9c19982	0.864339	0.476	0.124	2.23164e-176	9	AT5G60410	DNA-binding protein with MIZ/SP-RING zinc finger, PHD-finger and SAP domain-containing protein|ATSIZ1,SIZ1
Potra2n11c23297	1.92958	0.775	0.298	8.34077e-181	10
Potra2n17c31653	1.16584	0.885	0.646	4.39095e-87	10
Potra2n4c8828	1.61507	0.849	0.448	6.52891e-144	10
Potra2n5c11138	2.0623	0.866	0.376	2.56262e-206	10
Potra2n10c21489	1.87392	0.739	0.324	1.34345e-142	10	AT1G14890	Plant invertase/pectin methylesterase inhibitor superfamily protein
Potra2n3c7019	1.36414	0.285	0.067	8.36508e-84	10	AT1G28110	serine carboxypeptidase-like 45|SCPL45
Potra2n11c22967	1.51486	0.794	0.46	3.16762e-110	10	AT1G29980	choice-of-anchor C domain protein, putative (Protein of unknown function, DUF642)
Potra2n5c12165	1.5024	0.919	0.635	1.06034e-131	10	AT2G22170	Lipase/lipooxygenase, PLAT/LH2 family protein
Potra2n6c14289	2.12114	0.796	0.284	3.44163e-217	10	AT2G36570	Leucine-rich repeat protein kinase family protein
Potra2n6c14247	1.60757	0.628	0.303	2.52914e-85	10	AT2G36830	gamma tonoplast intrinsic protein|GAMMA-TIP,GAMMA-TIP1,TIP1;1
Potra2n2c4186	1.31472	0.393	0.123	1.20813e-83	10	AT3G25130	acidic leucine-rich nuclear phosphoprotein 32 family B protein
Potra2n8c16805	2.31227	0.904	0.416	2.53612e-211	10	AT3G54260	TRICHOME BIREFRINGENCE-LIKE 36|TBL36
Potra2n14c26873	1.84263	0.565	0.216	5.85577e-109	10	AT3G60900	FASCICLIN-like arabinogalactan-protein 10|FLA10
Potra2n13c25014	2.00652	0.89	0.627	2.84123e-129	10	AT4G03210	xyloglucan endotransglucosylase/hydrolase 9|XTH9
Potra2n19c33327	2.39711	0.858	0.34	2.32973e-229	10	AT4G03210	xyloglucan endotransglucosylase/hydrolase 9|XTH9
Potra2n5c11395	1.47245	0.817	0.594	6.52559e-82	10	AT4G08950	Phosphate-responsive 1 family protein|EXO
Potra2n12c24490	1.84302	0.435	0.122	1.03656e-108	10	AT4G24780	Pectin lyase-like superfamily protein
Potra2n9c18920	1.34105	0.824	0.54	7.64592e-84	10	AT4G35100	plasma membrane intrinsic protein 3|PIP2;7,PIP3,PIP3A,SIMIP
Potra2n203s34940	1.6941	0.709	0.303	4.29129e-134	10	AT5G66920	SKU5 similar 17|sks17
Potra2n203s34942	1.36043	0.618	0.297	6.50682e-83	10	AT5G66920	SKU5 similar 17|sks17
Potra2n18c32288	1.74752	0.907	0.452	2.88495e-152	11
Potra2n2c4046	1.50533	0.901	0.607	3.2077e-126	11
Potra2n601s36106	0.982813	0.216	0.011	6.33204e-278	11
Potra2n7c16402	1.61253	0.812	0.447	2.06401e-114	11
Potra2n14c27334	1.09762	0.334	0.068	1.22892e-112	11	AT1G02610	RING/FYVE/PHD zinc finger superfamily protein
Potra2n10c21312	1.39158	0.816	0.518	1.03804e-89	11	AT1G13340	Regulator of Vps4 activity in the MVB pathway protein
Potra2n15c28873	1.69044	0.423	0.1	1.27361e-128	11	AT1G18270	ketose-bisphosphate aldolase class-II family protein
Potra2n4c10032	1.53545	0.705	0.298	6.9497e-113	11	AT1G76160	SKU5 similar 5|sks5
Potra2n13c25049	1.46646	0.709	0.334	7.75376e-104	11	AT2G20900	diacylglycerol kinase 5|ATDGK5,DGK5
Potra2n2c4156	1.53306	0.753	0.382	4.54377e-106	11	AT3G07400	lipase class 3 family protein
Potra2n12c24306	1.45729	0.575	0.189	3.65279e-120	11	AT3G47730	ATP-binding cassette A2|ABCA2,ATATH1,ATH1
Potra2n16c30236	1.32258	0.724	0.37	3.36486e-94	11	AT3G54020	Inositol phosphorylceramide synthase 1|AtIPCS1
Potra2n14c27223	1.65946	0.678	0.266	3.03237e-124	11	AT3G62010	metal ion-binding protein
Potra2n5c11091	1.63982	0.744	0.414	6.78434e-89	11	AT4G09760	Protein kinase superfamily protein
Potra2n1c1036	1.17556	0.258	0.033	6.18574e-149	11	AT4G12430	Haloacid dehalogenase-like hydrolase (HAD) superfamily protein
Potra2n6c14734	1.40866	0.305	0.065	5.81589e-98	11	AT4G25810	xyloglucan endotransglycosylase 6|XTH23,XTR6
Potra2n19c33973	1.25381	0.441	0.114	2.26409e-113	11	AT5G16890	Exostosin family protein
Potra2n3c6784	1.61539	0.497	0.145	6.31963e-121	11	AT5G23570	XS domain-containing protein / XS zinc finger domain-containing protein-like protein
Potra2n11c23583	1.18007	0.254	0.021	4.23415e-225	11	AT5G63520	F-box/LRR protein
Potra2n7c15841	1.40048	0.579	0.222	2.28135e-99	11	AT5G63770	diacylglycerol kinase 2|ATDGK2,DGK2
Potra2n17c31184	1.19037	0.39	0.053	6.77708e-167	12
Potra2n1c2910	1.56674	0.486	0.084	2.57371e-160	12
Potra2n555s35941	0.93731	0.276	0.015	1.75375e-284	12	AT1G04410	Lactate/malate dehydrogenase family protein
Potra2n2c5902	1.55509	0.625	0.111	8.75518e-211	12	AT1G06550	ATP-dependent caseinolytic (Clp) protease/crotonase family protein
Potra2n1c609	1.39485	0.584	0.079	1.72185e-250	12	AT1G30900	VACUOLAR SORTING RECEPTOR 6|BP80-3;3,VSR3;3,VSR6
Potra2n1c953	1.6505	0.654	0.137	1.5371e-179	12	AT1G62990	homeobox knotted-like protein|IXR11,KNAT7
Potra2n2c6235	2.26959	0.674	0.07	0	12	AT1G75720	WEB family protein (DUF827)
Potra2n5c11789	2.66881	0.711	0.151	3.12375e-227	12	AT2G17972	transmembrane protein
Potra2n6c15311	1.93015	0.897	0.347	8.50503e-164	12	AT2G32300	uclacyanin 1
Potra2n16c30051	2.06996	0.935	0.41	3.22902e-163	12	AT2G37090	Nucleotide-diphospho-sugar transferases superfamily protein|IRX9
Potra2n3c7291	1.76467	0.501	0.043	0	12	AT2G46150	Late embryogenesis abundant (LEA) hydroxyproline-rich glycoprotein family
Potra2n13c25821	1.67212	0.553	0.073	1.16743e-257	12	AT3G04090	small and basic intrinsic protein 1A|SIP1;1,SIP1A
Potra2n8c18449	1.5629	0.793	0.212	9.9679e-178	12	AT3G21510	histidine-containing phosphotransmitter 1|AHP1
Potra2n2c4627	1.01332	0.24	0.013	1.05088e-245	12	AT4G02090	multidrug resistance protein ABC transporter family protein
Potra2n14c27573	1.16035	0.411	0.056	7.6027e-171	12	AT4G14200	Pentatricopeptide repeat (PPR) superfamily protein
Potra2n16c29289	1.96933	0.897	0.241	2.3503e-232	12	AT4G16380	Heavy metal transport/detoxification superfamily protein
Potra2n9c18922	1.10773	0.437	0.062	7.91312e-173	12	AT4G38550	phospholipase-like protein (PEARLI 4) family protein
Potra2n3c7042	1.6919	0.99	0.645	3.59855e-160	12	AT5G13420	Aldolase-type TIM barrel family protein
Potra2n19c33939	3.33115	0.982	0.357	2.35342e-274	12	AT5G16490	ROP-interactive CRIB motif-containing protein 4|RIC4
Potra2n12c24567	1.79603	0.687	0.162	5.75555e-175	12	AT5G63530	farnesylated protein 3|ATFP3,FP3
Potra2n18c32288	1.93237	1	0.453	1.08147e-156	13
Potra2n1c2588	1.19742	0.301	0.052	3.87957e-95	13
Potra2n5c10659	1.16803	0.536	0.225	8.94371e-52	13
Potra2n5c12440	2.3513	0.453	0.027	0	13
Potra2n7c16622	1.53816	0.283	0.02	1.51452e-234	13	AT1G78950	Terpenoid cyclases family protein
Potra2n16c29457	1.47327	0.341	0.039	2.00655e-174	13	AT2G01570	GRAS family transcription factor family protein|RGA,RGA1
Potra2n10c21671	1.35614	0.483	0.209	4.04148e-45	13	AT2G32150	Haloacid dehalogenase-like hydrolase (HAD) superfamily protein
Potra2n5c12612	1.30656	0.315	0.059	7.35063e-90	13	AT3G05510	Phospholipid/glycerol acyltransferase family protein
Potra2n8c17540	1.09958	0.643	0.346	5.54124e-44	13	AT3G06500	Plant neutral invertase family protein
Potra2n5c12589	1.74981	0.445	0.108	1.52197e-100	13	AT4G02570	cullin 1|ATCUL1,AXR6,CUL1
Potra2n4c10480	1.46608	0.56	0.199	2.40997e-74	13	AT4G19210	RNAse l inhibitor protein 2|ATRLI2,RLI2
Potra2n5c11862	1.06329	0.325	0.112	1.3277e-37	13	AT4G35800	RNA polymerase II large subunit|NRPB1,RNA_POL_II_LS,RNA_POL_II_LSRNA_POL_II_LS,RPB1
Potra2n16c30302	0.926572	0.405	0.182	1.84364e-28	13	AT5G01270	carboxyl-terminal domain (ctd) phosphatase-like 2|ATCPL2,CPL2
Potra2n18c33060	1.78836	0.752	0.338	4.38723e-93	13	AT5G11090	serine-rich protein-like protein
Potra2n1c1365	0.992714	0.576	0.37	8.11967e-23	13	AT5G47430	DWNN domain, a CCHC-type zinc finger
Potra2n18c33191	1.04272	0.413	0.203	2.85342e-25	13	AT5G57510	cotton fiber protein
Potra2n15c28458	0.956628	0.584	0.334	1.01829e-28	13	AT5G63130	Octicosapeptide/Phox/Bem1p family protein
Potra2n5c12233	0.947734	0.715	0.507	8.25663e-27	13	AT5G63770	diacylglycerol kinase 2|ATDGK2,DGK2
Potra2n11c22828	1.21225	0.321	0.019	2.54817e-284	14
Potra2n15c28802	2.63854	0.661	0.058	0	14
Potra2n11c23322	2.19794	0.533	0.024	0	14	AT1G28290	arabinogalactan protein 31|AGP31
Potra2n14c26599	1.85187	0.69	0.145	5.44137e-182	14	AT1G47670	Transmembrane amino acid transporter family protein
Potra2n12c24164	2.12326	0.58	0.037	0	14	AT1G73780	Bifunctional inhibitor/lipid-transfer protein/seed storage 2S albumin superfamily protein
Potra2n2c6181	2.38312	0.821	0.201	1.75285e-205	14	AT1G75500	Walls Are Thin 1|WAT1
Potra2n5c10753	3.09476	0.92	0.338	7.15661e-197	14	AT1G75500	Walls Are Thin 1|WAT1
Potra2n1c357	1.50729	0.375	0.017	0	14	AT1G80880	Tetratricopeptide repeat (TPR)-like superfamily protein
Potra2n14c27215	3.73733	0.943	0.152	0	14	AT2G46890	3-oxo-5-alpha-steroid 4-dehydrogenase (DUF1295)
Potra2n2c4139	1.34348	0.372	0.023	0	14	AT3G24660	transmembrane kinase-like 1|TMKL1
Potra2n15c27987	1.7019	0.44	0.051	3.14322e-206	14	AT3G48970	Heavy metal transport/detoxification superfamily protein
Potra2n5c11271	0.828284	0.217	0.01	1.85515e-221	14	AT4G08330	hypothetical protein
Potra2n5c11105	1.37056	0.372	0.042	2.14062e-175	14	AT4G09890	mediator of RNA polymerase II transcription subunit, putative (DUF3511)
Potra2n3c7460	1.74226	0.435	0.011	0	14	AT4G12110	sterol-4alpha-methyl oxidase 1-1|ATSMO1,ATSMO1-1,SMO1-1
Potra2n8c18019	1.92382	0.47	0.063	3.80921e-191	14	AT5G19530	S-adenosyl-L-methionine-dependent methyltransferases superfamily protein|ACL5
Potra2n3c6864	1.36544	0.298	0.015	1.54079e-290	14	AT5G25190	Integrase-type DNA-binding superfamily protein
Potra2n12c24764	3.19098	0.935	0.17	0	14	AT5G51550	EXORDIUM like 3|EXL3
Potra2n15c28112	2.33625	0.836	0.241	3.47475e-187	14	AT5G51550	EXORDIUM like 3|EXL3
Potra2n3c8264	3.81548	0.952	0.196	0	14	AT5G64080	Bifunctional inhibitor/lipid-transfer protein/seed storage 2S albumin superfamily protein
Potra2n7c16566	1.33693	0.387	0.035	2.84137e-224	14	AT5G65700	Leucine-rich receptor-like protein kinase family protein|BAM1
Potra2n3c7600	1.49276	0.338	0.012	0	15
Potra2n680s36424	1.87503	0.347	0.016	0	15	AT1G17200	Uncharacterized protein family (UPF0497)
Potra2n3c6923	2.38576	0.597	0.045	0	15	AT1G27920	microtubule-associated protein 65-8|MAP65-8
Potra2n3c7305	1.94913	0.481	0.042	2.71237e-291	15	AT1G63910	myb domain protein 103|AtMYB103,MYB103
Potra2n2c6158	1.31413	0.3	0.006	0	15	AT2G04520	Nucleic acid-binding, OB-fold-like protein
Potra2n10c20714	3.53878	0.869	0.061	0	15	AT2G38080	Laccase/Diphenol oxidase family protein|ATLMCO4,IRX12,LAC4,LMCO4
Potra2n11c22402	2.77609	0.778	0.101	0	15	AT3G13275	transmembrane protein
Potra2n11c23043	2.35154	0.641	0.074	0	15	AT3G15050	IQ-domain 10|IQD10
Potra2n1c3290	3.33774	0.881	0.165	0	15	AT3G15050	IQ-domain 10|IQD10
Potra2n5c11573	2.60602	0.844	0.135	0	15	AT3G50220	IRREGULAR XYLEM protein (DUF579)
Potra2n7c16234	2.7068	0.684	0.075	0	15	AT3G50220	IRREGULAR XYLEM protein (DUF579)
Potra2n2c5986	1.86298	0.334	0.009	0	15	AT4G14815	Bifunctional inhibitor/lipid-transfer protein/seed storage 2S albumin superfamily protein
Potra2n1c2807	1.64248	0.378	0.011	0	15	AT4G25040	Uncharacterized protein family (UPF0497)
Potra2n5c11765	4.10843	0.981	0.173	0	15	AT4G36220	ferulic acid 5-hydroxylase 1|CYP84A1,FAH1
Potra2n7c16495	3.69579	0.912	0.058	0	15	AT4G36220	ferulic acid 5-hydroxylase 1|CYP84A1,FAH1
Potra2n16c30059	1.09357	0.225	0.007	0	15	AT5G03120	transmembrane protein
Potra2n1c880	2.79453	0.566	0.038	0	15	AT5G12250	beta-6 tubulin|TUB6
Potra2n16c29269	1.04005	0.25	0.011	8.40384e-268	15	AT5G55930	oligopeptide transporter 1|ATOPT1,OPT1
Potra2n12c23847	1.84038	0.212	0.006	0	15	AT5G60490	FASCICLIN-like arabinogalactan-protein 12|FLA12
Potra2n15c28410	1.33666	0.3	0.015	8.9997e-295	15	AT5G61640	peptidemethionine sulfoxide reductase 1
Potra2n5c11446	1.10438	0.265	0.019	9.01416e-180	16
Potra2n1c1794	1.64458	0.628	0.159	1.4901e-124	16	AT1G15200	protein-protein interaction regulator family protein
Potra2n3c7528	1.18517	0.29	0.027	4.2643e-156	16	AT1G31120	K+ uptake permease 10|KUP10
Potra2n2c6439	1.09732	0.297	0.03	1.24222e-145	16	AT1G76620	Serine/Threonine-kinase, putative (Protein of unknown function, DUF547)
Potra2n10c21459	1.1186	0.344	0.04	2.26488e-145	16	AT2G01460	P-loop containing nucleoside triphosphate hydrolases superfamily protein
Potra2n351s35379	0.865551	0.224	0.019	4.46391e-127	16	AT2G27170	Structural maintenance of chromosomes (SMC) family protein
Potra2n10c22223	1.13933	0.325	0.04	1.83438e-128	16	AT2G28290	P-loop containing nucleoside triphosphate hydrolases superfamily protein|CHR3,SYD
Potra2n9c19735	1.48348	0.454	0.064	4.21629e-162	16	AT2G29890	villin-like 1|ATVLN1,VLN1
Potra2n2c4587	1.91405	0.804	0.274	5.54401e-131	16	AT2G47500	P-loop nucleoside triphosphate hydrolases superfamily protein with CH (Calponin Homology) domain-containing protein
Potra2n14c27598	1.23336	0.353	0.048	3.55639e-125	16	AT3G07340	basic helix-loop-helix (bHLH) DNA-binding superfamily protein
Potra2n12c24146	1.37629	0.394	0.06	4.02451e-126	16	AT3G18170	Glycosyltransferase family 61 protein
Potra2n8c18486	1.62501	0.438	0.071	1.96294e-135	16	AT3G23590	REF4-related 1|MED33A,RFR1
Potra2n2c4645	1.39027	0.438	0.074	4.39244e-124	16	AT4G02010	Protein kinase superfamily protein
Potra2n7c16113	1.8048	0.587	0.074	1.66978e-247	16	AT4G35780	ACT-like protein tyrosine kinase family protein
Potra2n5c11602	1.73691	0.662	0.134	1.29634e-173	16	AT4G36980	CLK4-associating serine/arginine-rich protein
Potra2n7c16264	2.12112	0.726	0.134	3.08037e-224	16	AT4G36980	CLK4-associating serine/arginine-rich protein
Potra2n2c5977	1.85435	0.628	0.117	3.72649e-175	16	AT5G36740	Acyl-CoA N-acyltransferase with RING/FYVE/PHD-type zinc finger protein
Potra2n1c3147	1.52516	0.486	0.072	5.25334e-165	16	AT5G55100	SWAP (Suppressor-of-White-APricot)/surp domain-containing protein
Potra2n1c4016	1.81382	0.65	0.167	3.85165e-130	16	AT5G56270	WRKY DNA-binding protein 2|ATWRKY2,WRKY2
Potra2n1c17	1.50921	0.498	0.072	1.55108e-174	16	AT5G56360	calmodulin-binding protein|PSL4
Potra2n10c22101	2.48053	0.386	0.015	0	17	AT1G10460	germin-like protein 7|GLP7
Potra2n4c8470	3.82978	0.898	0.224	1.98417e-244	17	AT1G11910	aspartic proteinase A1|APA1,ATAPA1
Potra2n2c6410	4.97134	0.963	0.162	0	17	AT1G20850	xylem cysteine peptidase 2|XCP2
Potra2n5c10536	4.20962	0.763	0.073	0	17	AT1G20850	xylem cysteine peptidase 2|XCP2
Potra2n11c22448	1.98615	0.325	0.01	0	17	AT1G23460	Pectin lyase-like superfamily protein
Potra2n1c3919	2.73921	0.586	0.026	0	17	AT1G23460	Pectin lyase-like superfamily protein
Potra2n8c17393	3.14143	0.495	0.025	0	17	AT1G26820	ribonuclease 3|RNS3
Potra2n6c14577	3.09872	0.681	0.093	5.10438e-276	17	AT2G29130	laccase 2|ATLAC2,LAC2
Potra2n13c24959	2.92657	0.8	0.214	2.11249e-181	17	AT2G30490	cinnamate-4-hydroxylase|ATC4H,C4H,CYP73A5,REF3
Potra2n6c14885	1.67739	0.231	0.004	0	17	AT2G42250	cytochrome P450, family 712, subfamily A, polypeptide 1|CYP712A1
Potra2n16c30285	3.84855	0.847	0.128	0	17	AT2G45960	plasma membrane intrinsic protein 1B|ATHH2,PIP1;2,PIP1B,TMP-A
Potra2n8c16919	3.445	0.919	0.299	7.83874e-206	17	AT3G10410	SERINE CARBOXYPEPTIDASE-LIKE 49|CPY,SCPL49
Potra2n16c29456	3.29759	0.766	0.123	2.79137e-278	17	AT3G10740	alpha-L-arabinofuranosidase 1
Potra2n1c2900	3.14183	0.793	0.167	8.32285e-228	17	AT3G27200	Cupredoxin superfamily protein
Potra2n3c7308	2.0694	0.4	0.013	0	17	AT4G23500	Pectin lyase-like superfamily protein
Potra2n5c11765	3.22781	0.82	0.176	3.69989e-230	17	AT4G36220	ferulic acid 5-hydroxylase 1|CYP84A1,FAH1
Potra2n16c30520	4.07435	0.895	0.153	0	17	AT5G01930	Glycosyl hydrolase superfamily protein
Potra2n6c14358	4.28446	0.875	0.081	0	17	AT5G01930	Glycosyl hydrolase superfamily protein
Potra2n11c22797	2.05271	0.295	0.016	1.78654e-247	17	AT5G60020	laccase 17|ATLAC17,LAC17
Potra2n12c24654	2.86355	0.597	0.062	0	17	AT5G61760	inositol polyphosphate kinase 2 beta|ATIPK2BETA,IPK2B,IPK2BETA
Potra2n12c23826	3.77781	0.423	0.032	1.4051e-167	18
Potra2n13c25697	2.68651	0.833	0.438	7.19265e-43	18
Potra2n14c26580	4.22105	0.304	0.028	2.04461e-95	18
Potra2n4c8814	1.43037	0.268	0.044	6.00829e-42	18	AT1G28330	dormancy-associated protein-like 1|DRM1,DYL1
Potra2n4c9798	2.88537	0.286	0.036	2.27077e-63	18	AT1G49310	transmembrane protein
Potra2n18c32483	1.78675	0.387	0.086	1.27566e-43	18	AT2G18960	H[+]-ATPase 1
Potra2n6c14597	2.01283	0.732	0.495	2.28977e-22	18	AT3G09390	metallothionein 2A
Potra2n9c19859	4.8956	0.786	0.199	1.71432e-107	18	AT3G09390	metallothionein 2A
Potra2n11c22811	2.58193	0.333	0.023	1.33222e-141	18	AT3G15353	metallothionein 3|ATMT3,MT3
Potra2n5c10828	0.887894	0.232	0.011	3.77743e-141	18	AT3G23290	LIGHT-DEPENDENT SHORT HYPOCOTYLS-like protein (DUF640)|LSH4
Potra2n8c17208	1.04417	0.762	0.528	5.92329e-14	18	AT4G00430	plasma membrane intrinsic protein 1;4|PIP1;4,PIP1E,TMP-C
Potra2n11c22555	2.04893	0.631	0.243	7.72969e-42	18	AT4G10380	NOD26-like intrinsic protein 5;1|NIP5;1,NLM6,NLM8
Potra2n6c13323	2.19269	0.524	0.141	1.65096e-50	18	AT4G33040	Thioredoxin superfamily protein
Potra2n7c15818	3.99493	0.417	0.009	0	18	AT5G09220	amino acid permease 2|AAP2
Potra2n3c7009	1.1872	0.696	0.482	4.73244e-11	18	AT5G13220	jasmonate-zim-domain protein 10|JAS1,JAZ10,TIFY9
Potra2n15c28577	3.09034	0.327	0.108	4.38205e-18	18	AT5G14920	Gibberellin-regulated family protein
Potra2n1c2589	0.866338	0.5	0.272	1.31024e-09	18	AT5G21090	Leucine-rich repeat (LRR) family protein
Potra2n9c19321	1.45827	0.571	0.283	1.16472e-20	18	AT5G21090	Leucine-rich repeat (LRR) family protein
Potra2n5c11916	1.29018	0.28	0.049	7.97053e-39	18	AT5G42510	Disease resistance-responsive (dirigent-like protein) family protein
Potra2n12c24650	1.44154	0.25	0.008	1.58454e-207	18	AT5G61800	Pentatricopeptide repeat (PPR) superfamily protein
Potra2n7c15683	1.27227	0.211	0.001	0	19
Potra2n7c15685	1.98622	0.373	0.002	0	19
Potra2n7c15689	1.70632	0.331	0.001	0	19
Potra2n8c17673	1.75263	0.218	0.002	0	19
Potra2n8c18581	1.40492	0.211	0.001	0	19
Potra2n9c19910	1.67456	0.317	0.002	0	19	AT1G05590	beta-hexosaminidase 2|ATHEX3,HEXO2
Potra2n9c19357	1.26397	0.225	0.003	0	19	AT1G49960	Xanthine/uracil permease family protein
Potra2n10c21469	2.44013	0.472	0.003	0	19	AT1G70850	MLP-like protein 34|MLP34
Potra2n12c24293	1.1968	0.218	0.001	0	19	AT1G74460	GDSL-like Lipase/Acylhydrolase superfamily protein
Potra2n19c34167	1.23001	0.225	0.001	0	19	AT3G05950	RmlC-like cupins superfamily protein
Potra2n19c33452	1.25868	0.232	0.015	5.04466e-90	19	AT3G09390	metallothionein 2A
Potra2n1c3495	1.29506	0.239	0.019	6.34406e-72	19	AT3G15353	metallothionein 3|ATMT3,MT3
Potra2n9c18825	1.37037	0.282	0.036	4.16651e-50	19	AT3G44716	hypothetical protein
Potra2n2c5986	1.7171	0.331	0.011	3.22856e-232	19	AT4G14815	Bifunctional inhibitor/lipid-transfer protein/seed storage 2S albumin superfamily protein
Potra2n11c22484	2.09285	0.423	0.004	0	19	AT4G20390	Uncharacterized protein family (UPF0497)
Potra2n7c15682	1.96221	0.387	0.016	4.03279e-231	19	AT4G33580	beta carbonic anhydrase 5
Potra2n5c12320	1.82853	0.296	0.007	1.51356e-271	19	AT5G09760	Plant invertase/pectin methylesterase inhibitor superfamily
Potra2n6c13160	1.33909	0.232	0.001	0	19	AT5G25610	BURP domain-containing protein|ATRD22,RD22
Potra2n1c2838	1.23934	0.246	0.009	1.70444e-158	19	AT5G41040	HXXXD-type acyl-transferase family protein
Potra2n6c15259	1.00633	0.218	0.016	1.32383e-69	19	AT5G47530	Auxin-responsive family protein
Potra2n14c27365	1.69783	0.327	0.001	0	20	AT1G02730	cellulose synthase(cesa)-like D5|ATCSLD5,CSLD5,SOS6
Potra2n2c4070	2.34968	0.551	0.004	0	20	AT1G04030	eisosome protein
Potra2n3c7158	2.21782	0.388	0.004	0	20	AT1G31335	transmembrane protein
Potra2n9c19378	2.14696	0.347	0.001	0	20	AT2G16270	transmembrane protein
Potra2n7c15470	2.62062	0.429	0.002	0	20	AT2G20590	Reticulon family protein
Potra2n6c12962	2.58888	0.408	0.003	0	20	AT2G25060	early nodulin-like protein 14|AtENODL14,ENODL14
Potra2n10c21855	1.51116	0.306	0.002	0	20	AT2G33400	FK506-binding nuclear-like protein
Potra2n17c31100	2.43113	0.449	0.004	0	20	AT3G02120	hydroxyproline-rich glycoprotein family protein
Potra2n5c12554	1.6241	0.265	0.001	0	20	AT3G05330	cyclin family|ATN,ATTAN
Potra2n3c7951	1.74581	0.388	0.004	0	20	AT3G15550	trichohyalin
Potra2n18c32702	2.68899	0.367	0.002	0	20	AT3G42725	Putative membrane lipoprotein
Potra2n5c10979	2.05001	0.469	0.004	0	20	AT4G02800	GRIP/coiled-coil protein
Potra2n5c12235	1.87515	0.327	0.002	0	20	AT4G08330	hypothetical protein
Potra2n14c27766	2.43303	0.469	0.004	0	20	AT4G12730	FASCICLIN-like arabinogalactan 2|FLA2
Potra2n10c21831	1.39124	0.265	0.002	0	20	AT4G14330	P-loop containing nucleoside triphosphate hydrolases superfamily protein
Potra2n18c33107	4.1434	0.694	0.013	0	20	AT4G31840	early nodulin-like protein 15|AtENODL15,ENODL15
Potra2n10c20846	2.617	0.449	0.002	0	20	AT5G16250	transmembrane protein
Potra2n13c25185	3.81823	0.673	0.009	0	20	AT5G16250	transmembrane protein
Potra2n19c33482	2.11901	0.327	0.001	0	20	AT5G16250	transmembrane protein
Potra2n8c17318	3.08864	0.408	0.003	0	20	AT5G16250	transmembrane protein

## Sheet: S2B
GeneID	GeneName	Best Arabidospis hit	TAIR_Description	Cluster number	Cell Type tissue, or function	Citations
Potra2n19c33666	PATL3	AT1G72160	Sec14p-like phosphatidylinositol transfer family protein	1		Identified marker in this study
Potra2n1c2551	WLIM1	AT1G10200	GATA type zinc finger transcription factor family protein	1		Identified marker in this study
Potra2n14c27157	RABA3	AT1G01200	RAB GTPase homolog A3|ATRAB-A3,ATRABA3,RABA3	1		Identified marker in this study
Potra2n4c9970	Major facilitator superfamily protein	AT2G16660	Major facilitator superfamily protein	2		Identified marker in this study
Potra2n5c11849	Eukaryotic aspartyl protease family protein	AT2G17760	Eukaryotic aspartyl protease family protein	2		Identified marker in this study
Potra2n18c32663	NUDX19	AT5G20070	nudix hydrolase homolog 19|ATNUDT19,ATNUDX19,NUDX19	3		Identified marker in this study
Potra2n10c20147	ACA9	AT3G21180	autoinhibited Ca(2+)-ATPase 9	3		Identified marker in this study
Potra2n1c546	IRX10	AT1G27440	Exostosin family protein|ATGUT1,GUT2,IRX10	4	Fiber	Multiple sources
Potra2n6c14160	PtGT43A	AT2G37090	Nucleotide-diphospho-sugar transferases superfamily protein|IRX9	4	Fiber	Multiple sources
Potra2n15c28689	COBL4	AT5G15630	COBRA-like extracellular glycosyl-phosphatidyl inositol-anchored protein family	4	Fiber	[1]
Potra2n9c18755	LAC2	AT2G29130	laccase 2|ATLAC2,LAC2	4	Laccase family	[2]
Potra2n11c23199	CESA8	AT4G18780	cellulose synthase(cesa) family protein|ATCESA8,CESA8,IRX1,LEW2	4	Xylem (fiber and vessel)	[3]
Potra2n7c16228	IRX14	AT4G36890	Nucleotide-diphospho-sugar transferases superfamily protein|IRX14	4	Xylem (fiber and vessel)	[3]
Potra2n18c32336	CESA7	AT5G17420	Cellulose synthase family protein|ATCESA7,CESA7,IRX3,MUR10	4	Xylem (fiber and vessel)	[3]
Potra2n9c20060	IRX7	AT2G28110	Exostosin family protein	4
Potra2n6c14180	FLA11	AT5G03170	FASCICLIN-like arabinogalactan-protein 11|ATFLA11,FLA11	4
Potra2n14c26506	PtWOX4a	AT1G46480	WUSCHEL related homeobox 4	5	Meristem identity	[3, 4, 5]
Potra2n14c27801	LHCA3	AT1G61520	PSI type III chlorophyll a/b-binding protein|LHCA3	5	Photosynthetic cells	[3]
Potra2n14c27834	PSI subunit L	AT4G12800	photosystem I subunit l|PSAL	5	Photosynthetic cells	[3]
Potra2n10c20181	EIN3	AT3G20770	Ethylene insensitive 3 family protein|AtEIN3,EIN3	5	Ray	Identified marker in this study
Potra2n3c6926	LDAP1	AT1G67360	Rubber elongation factor protein (REF)	5		Identified marker in this study
Potra2n1c1091	PtPXY	AT5G61480	Leucine-rich repeat protein kinase family protein|PXY	6	Cambium	[3]
Potra2n16c30073	FLA11	AT5G03170	FASCICLIN-like arabinogalactan-protein 11|ATFLA11,FLA11	6	Fiber	[1]
Potra2n10c20736	AUX1	AT2G38120	Transmembrane amino acid transporter family protein	6		Identified marker in this study
Potra2n17c30987	TBL21	AT5G15890	TRICHOME BIREFRINGENCE-LIKE 21|TBL21	6		Identified marker in this study
Potra2n1c90	LTPG6	AT1G55260	Bifunctional inhibitor/lipid-transfer protein/seed storage 2S albumin superfamily protein	7		Identified marker in this study
Potra2n3c8020	TIP2;1	AT3G16240	delta tonoplast integral protein|AQP1,ATTIP2;1,DELTA-TIP,DELTA-TIP1,TIP2;1	7		Identified marker in this study
Potra2n1c2010	DUF239	AT3G13510	carboxyl-terminal peptidase, putative (DUF239)	7		Identified marker in this study
Potra2n1c232	Asp protease	AT5G07030	Eukaryotic aspartyl protease family protein	7		Identified marker in this study
Potra2n16c29243	C/VIF2	AT5G64620	cell wall / vacuolar inhibitor of fructosidase 2	7		Identified marker in this study
Potra2n6c15220	HMP35	AT4G16380	Heavy metal transport/detoxification superfamily protein	8		Identified marker in this study
Potra2n6c13057	IAA29	AT4G32280	indole-3-acetic acid inducible 29	8		Identified marker in this study
Potra2n2c4342	PRN2	AT2G43120	RmlC-like cupins superfamily protein	9	Ray	Identified marker in this study; [11]
Potra2n14c27610	PRN1/2	AT2G43120	RmlC-like cupins superfamily protein	9	Ray	Identified marker in this study; [11]
Potra2n14c26986	BAM7	AT2G45880	beta-amylase 7|BAM7,BMY4	9		Identified marker in this study
Potra2n5c11250	NAC2	AT1G01720	NAC (No Apical Meristem) domain transcriptional regulator superfamily protein	9		Identified marker in this study
Potra2n8c17012	RAP2.7	AT2G2855	related to AP2.7	9		Identified marker in this study
Potra2n13c26298	RCI2A	AT3G05880	Low temperature and salt responsive protein family|RCI2A	10		Identified marker in this study
Potra2n4c10032	sks5	AT1G76160	SKU5 similar 5|sks5	11		Identified marker in this study
Potra2n13c25049	DGK5	AT2G20900	diacylglycerol kinase 5|ATDGK5,DGK5	11		Identified marker in this study
Potra2n5c11091	CEK3	AT4G09760	Protein kinase superfamily protein	11		Identified marker in this study
Potra2n10c22224	MEE32	AT3G06350	dehydroquinate dehydratase, putative / shikimate dehydrogenase|EMB3004,MEE32	12	Fiber	Identified marker in this study
Potra2n3c6847	PtCCR2	AT1G15950	cinnamoyl coa reductase 1	12	Lignin biosynthesis	[6]
Potra2n16c30091	PtPAL3	AT2G37040	PHE ammonia lyase 1|ATPAL1,PAL1	12	Lignin biosynthesis	Identified marker in this study; [6]
Potra2n8c16946	PtPAL2	AT2G37040	PHE ammonia lyase 1|ATPAL1,PAL1	12	Lignin biosynthesis	[6]
Potra2n9c19246	PtCCoAOMT1	AT4G34050	S-adenosyl-L-methionine-dependent methyltransferases superfamily protein	12	Lignin biosynthesis	[6]
Potra2n1c953	KNAT7	AT1G62990	homeobox knotted-like protein|IXR11,KNAT7	12	Xylem (fiber and vessel)	[3, 5]
Potra2n16c30051	PtGT43B	AT2G37090	Nucleotide-diphospho-sugar transferases superfamily protein|IRX9	12	Xylem (fiber and vessel)	Identified marker in this study; [3]
Potra2n11c22498	PtSND1	AT2G46770	NAC (No Apical Meristem) domain transcriptional regulator superfamily protein|ANAC043,EMB2301,NST1	12	Xylem (fiber and vessel)	[3]
Potra2n9c19651	MYB83	AT3G08500	myb domain protein 83|AtMYB83,MYB83	12	Xylem (fiber and vessel)	[3]
Potra2n5c11905	PtWOX13a	AT4G35550	WUSCHEL related homeobox 13|ATWOX13,HB-4,WOX13	12		[8]
Potra2n2c6235	WEB family protein (DUF827)	AT1G75720	WEB family protein (DUF827)	12		Identified marker in this study
Potra2n1c609	VSR6	AT1G30900	VACUOLAR SORTING RECEPTOR 6|BP80-3;3,VSR3;3,VSR6	12		Identified marker in this study
Potra2n18c33191	Cotton fiber protein	AT5G57510	cotton fiber protein	13		Identified marker in this study
Potra2n18c33060	Ser-rich protein-like	AT5G11090	serine-rich protein-like protein	13		Identified marker in this study
Potra2n5c12440				13		Identified marker in this study
Potra2n5c10659				13		Identified marker in this study
Potra2n15c28861	PIN7	AT1G23080	Auxin efflux carrier family protein|ATPIN7,PIN7	14	Auxin response	[5]
Potra2n2c6181	WAT1	AT1G75500	Walls Are Thin 1|WAT1	14	Auxin response	[5]; Identified marker in this study
Potra2n19c33790	CEL3	AT1G71380	cellulase 3|ATCEL3,ATGH9B3,CEL3	14	Fusiform late precursor and vessel element	[1]
Potra2n5c10753	WAT1	AT1G75500	Walls Are Thin 1|WAT1	14	Fusiform late precursor and vessel element	[1]; Identified marker in this study
Potra2n3c7548	PXY	AT5G61480	Leucine-rich repeat protein kinase family protein|PXY	14	Meristem identity	[5, 7]
Potra2n6c13361	ACL5	AT5G19530	ACAULIS 5	14	Vessel	Identified marker in this study
Potra2n5c11571	IRX14	AT4G36890	Nucleotide-diphospho-sugar transferases superfamily protein|IRX14	15	Fiber	Multiple sources
Potra2n15c28411	CEP1	AT5G50260	Cysteine proteinases superfamily protein	15	Late fiber expressing	Identified marker in this study
Potra2n3c7945	PtCSE1	AT1G52760	lysophospholipase 2|LysoPL2	15	Lignin biosynthesis	[6]
Potra2n13c24959	PtC4H1	AT2G30490	cinnamate-4-hydroxylase|ATC4H,C4H,CYP73A5,REF3	15	Lignin biosynthesis	[6]
Potra2n10c20411	PtPAL4	AT2G37040	PHE ammonia lyase 1|ATPAL1,PAL1	15	Lignin biosynthesis	[6]
Potra2n6c15127	PtC3H3	AT2G40890	cytochrome P450, family 98, subfamily A, polypeptide 3|CYP98A3	15	Lignin biosynthesis	[6]
Potra2n1c2649	PtCCoAOMT2	AT4G34050	S-adenosyl-L-methionine-dependent methyltransferases superfamily protein	15	Lignin biosynthesis	[6]
Potra2n9c19275	PtCAD1	AT4G34230	cinnamyl alcohol dehydrogenase 5|ATCAD5,CAD-5,CAD5	15	Lignin biosynthesis	[6]
Potra2n7c16495	F5H1	AT4G36220	ferulic acid 5-hydroxylase 1|CYP84A1,FAH1	15	Lignin biosynthesis	Identified marker in this study; [6]
Potra2n5c11765	PtF5H1	AT4G36220	ferulic acid 5-hydroxylase 1|CYP84A1,FAH1	15	Lignin biosynthesis	[6]
Potra2n3c6817	PtHCT1	AT5G48930	hydroxycinnamoyl-CoA shikimate/quinate hydroxycinnamoyl transferase|HCT	15	Lignin biosynthesis	[6]
Potra2n12c23766	PtCOMT2	AT5G54160	O-methyltransferase 1|ATOMT1,OMT1	15	Lignin biosynthesis	[6]
Potra2n3c7305	MYB103	AT1G63910	myb domain protein 103|AtMYB103,MYB103	15	Secondary cell wall	[5]
Potra2n6c13749	CESA7	AT5G17420	Cellulose synthase family protein|ATCESA7,CESA7,IRX3,MUR10	15	Wood	[2]
Potra2n10c20714	LAC4	AT2G38080	Laccase/Diphenol oxidase family protein|ATLMCO4,IRX12,LAC4,LMCO4	15	Xylem (fiber and vessel)	[3]
Potra2n7c16234	IRX15	AT3G50220	IRREGULAR XYLEM protein (DUF579)	15	Xylem (fiber and vessel)	[3]
Potra2n5c11573	IRX15	AT3G50220	IRREGULAR XYLEM protein (DUF579)	15	Xylem (fiber and vessel)	[3]
Potra2n2c5282	PtWOX4b	AT1G46480	WUSCHEL related homeobox 4	16	Cambium	[3, 4, 5]
Potra2n14c27598	PIB	AT3G07340	basic helix-loop-helix (bHLH) DNA-binding superfamily protein	16	Cambium	Identified marker in this study
Potra2n1c2087	EXPA6	AT2G28950	expansin A6|ATEXP6,ATEXPA6,ATHEXP ALPHA 1.8,EXPA6	16	Cell expansion	[5]
Potra2n1c4016	WRKY2	AT5G56270	WRKY DNA-binding protein 2|ATWRKY2,WRKY2	16	Fiber	Multiple sources
Potra2n4c8470	PASPA1	AT1G11910	aspartic proteinase A1|APA1,ATAPA1	17	Vessel	Multiple sources
Potra2n1c3919	Pectin lyase-like	AT1G23460	Pectin lyase-like superfamily protein	17	Vessel	Multiple sources
Potra2n8c17393	RNAseIII	AT1G26820	ribonuclease 3|RNS3	17	Vessel	Multiple sources
Potra2n2c5389	RXF12	AT1G58370	glycosyl hydrolase family 10 protein / carbohydrate-binding domain-containing protein	17	Vessel	Identified marker in this study
Potra2n6c14358	MAN6	AT5G01930	Glycosyl hydrolase superfamily protein	17	Vessel	Multiple sources
Potra2n16c30520	MAN6	AT5G01930	Glycosyl hydrolase superfamily protein	17	Vessel	Multiple sources
Potra2n16c29448	MC14	AT5G04200	metacaspase 9|AtMC9,MC9	17	Vessel	Identified marker in this study; multiple sources
Potra2n6c15163	MC13	AT5G13740	zinc induced facilitator 1|ZIF1	17	Vessel	Identified marker in this study
Potra2n5c10536	XCP2b	AT1G20850	xylem cysteine peptidase 2|XCP2	17	Vessel; xylem differentiation	[5]
Potra2n2c6410	XCP2a	AT1G20850	xylem cysteine peptidase 2|XCP2	17	Xylem differentiation	[5]
Potra2n2c4235	PtCLE41b	AT3G24770	CLAVATA3/ESR-RELATED 41|CLE41	18	Meristem identity	[5, 8]
Potra2n11c22811	MT3	AT3G15353	metallothionein 3|ATMT3,MT3	18		Identified marker in this study
Potra2n7c15818	AAP2	AT5G09220	amino acid permease 2|AAP2	18		Identified marker in this study
Potra2n2c5371	ANT	AT4G37750	Integrase-type DNA-binding superfamily protein|ANT,CKC,CKC1,DRG	19	Meristem identity	[5]
Potra2n8c18612	SWEET17	AT4G15920	Nodulin MtN3 family protein	19	Phloem	Multiple sources
Potra2n18c33107	ENODLP15	AT4G31840	early nodulin-like protein 15|AtENODL15,ENODL15	20	Cell cycle	[5]
Potra2n16c30563	CDKB1;2	AT2G38620	cyclin-dependent kinase B1;2	20	G2 phase	[9, 10]
Potra2n6c12962	ENODL14	AT2G25060	early nodulin-like protein 14|AtENODL14,ENODL14	20	M phase	[9, 10]
Potra2n17c31100	Hydroxypro-rich glycoprotein family	AT3G02120	hydroxyproline-rich glycoprotein family protein	20		Identified marker in this study
Potra2n6c15109	CYCB1;2	AT5G06150	Cyclin family protein|CYC1BAT,CYCB1;2	20	M phase	[9, 10]
Potra2n7c15470	RTN17	AT2G20590	Reticulon family protein	20		Identified marker in this study

## Sheet: S2C
GO_ID	Term	Annotated	Significant	Expected	False Discovery Rate	Category	Cluster number
GO:0005976	polysaccharide metabolic process	637	13	3.33	9.7e-07	BP	2
GO:0055085	transmembrane transport	1421	20	7.42	3.2e-06	BP	2
GO:0071554	cell wall organization or biogenesis	473	11	2.47	1e-05	BP	2
GO:0045229	external encapsulating structure organization	334	9	1.75	1.7e-05	BP	2
GO:0005975	carbohydrate metabolic process	1327	16	6.93	2e-05	BP	2
GO:0055044	symplast	449	16	2.42	1.7e-09	CC	2
GO:0030054	cell junction	454	16	2.44	2e-09	CC	2
GO:0071944	cell periphery	2052	30	11.04	7.7e-08	CC	2
GO:0005783	endoplasmic reticulum	732	14	3.94	1.9e-07	CC	2
GO:0012505	endomembrane system	1775	24	9.55	1.2e-05	CC	2
GO:0016528	sarcoplasm	32	4	0.17	1.6e-05	CC	2
GO:0005794	Golgi apparatus	955	13	5.14	2.6e-05	CC	2
GO:0016020	membrane	4153	37	22.34	0.00029	CC	2
GO:0005215	transporter activity	1331	21	6.48	1.2e-06	MF	2
GO:0044036	cell wall macromolecule metabolic process	167	13	1.12	2.5e-12	BP	4
GO:0005975	carbohydrate metabolic process	1327	31	8.89	6.4e-12	BP	4
GO:0000271	polysaccharide biosynthetic process	218	15	1.46	9.8e-12	BP	4
GO:0005976	polysaccharide metabolic process	637	21	4.27	2.2e-11	BP	4
GO:0016051	carbohydrate biosynthetic process	469	20	3.14	4.1e-11	BP	4
GO:0042546	cell wall biogenesis	212	15	1.42	5.8e-10	BP	4
GO:0071554	cell wall organization or biogenesis	473	18	3.17	3.3e-09	BP	4
GO:0090376	seed trichome differentiation	86	7	0.58	7.9e-06	BP	4
GO:0007010	cytoskeleton organization	342	11	2.29	1.9e-05	BP	4
GO:0022412	cellular process involved in reproduction	127	7	0.85	2.7e-05	BP	4
GO:0071669	plant-type cell wall organization or biogenesis	174	15	1.17	5.1e-05	BP	4
GO:0055086	nucleobase-containing small molecule metabolic process	894	14	5.99	7.9e-05	BP	4
GO:0032504	multicellular organism reproduction	171	7	1.15	0.0001	BP	4
GO:0005794	Golgi apparatus	955	29	7.34	1.4e-11	CC	4
GO:0005829	cytosol	1410	30	10.84	1.9e-07	CC	4
GO:0071944	cell periphery	2052	37	15.77	2.9e-07	CC	4
GO:0012505	endomembrane system	1775	31	13.64	8e-06	CC	4
GO:0016020	membrane	4153	53	31.91	1.6e-05	CC	4
GO:0005856	cytoskeleton	477	13	3.67	3.5e-05	CC	4
GO:0005737	cytoplasm	6504	70	49.98	7.1e-05	CC	4
GO:0099080	supramolecular complex	325	10	2.5	0.00023	CC	4
GO:0032561	guanyl ribonucleotide binding	354	15	2.06	6e-09	MF	4
GO:0005525	GTP binding	354	15	2.06	2.2e-08	MF	4
GO:0019001	guanyl nucleotide binding	356	15	2.08	2.3e-08	MF	4
GO:0005200	structural constituent of cytoskeleton	50	7	0.29	2.2e-06	MF	4
GO:0043228	non-membrane-bounded organelle	2498	24	10.75	3.2e-05	CC	5
GO:0043232	intracellular non-membrane-bounded organelle	2498	24	10.75	3.3e-05	CC	5
GO:0005198	structural molecule activity	671	13	2.41	6.2e-07	MF	5
GO:0071554	cell wall organization or biogenesis	473	11	1.28	6.9e-08	BP	6
GO:0045764	positive regulation of amino acid metabolic process	2	2	0.01	9.2e-06	BP	6
GO:0033238	regulation of amine metabolic process	4	2	0.01	1.3e-05	BP	6
GO:0090354	regulation of auxin metabolic process	4	2	0.01	1.4e-05	BP	6
GO:0006521	regulation of cellular amino acid metabolism	4	2	0.01	1.7e-05	BP	6
GO:0032350	regulation of hormone metabolic process	4	2	0.01	1.8e-05	BP	6
GO:0033240	positive regulation of amine metabolic process	2	2	0.01	1.9e-05	BP	6
GO:0090358	positive regulation of tryptophan metabolic process	2	2	0.01	2.3e-05	BP	6
GO:0032352	positive regulation of hormone metabolic process	2	2	0.01	2.4e-05	BP	6
GO:0090355	positive regulation of auxin metabolic process	2	2	0.01	3.7e-05	BP	6
GO:0042546	cell wall biogenesis	212	8	0.57	6.2e-05	BP	6
GO:0090357	regulation of tryptophan metabolic process	2	2	0.01	6.2e-05	BP	6
GO:0071944	cell periphery	2052	19	7.1	2.1e-05	CC	6
GO:0010468	regulation of gene expression	2377	66	37.11	2.8e-09	BP	9
GO:0034654	nucleobase-containing compound biosynthetic process	2335	62	36.46	9e-09	BP	9
GO:0051252	regulation of RNA metabolic process	2086	59	32.57	1.1e-08	BP	9
GO:0010556	regulation of macromolecule biosynthetic process	2389	66	37.3	1.1e-08	BP	9
GO:0032774	RNA biosynthetic process	2010	59	31.38	2.5e-08	BP	9
GO:0006351	DNA-templated transcription	1997	59	31.18	3.1e-08	BP	9
GO:0009889	regulation of biosynthetic process	2422	68	37.82	3.4e-08	BP	9
GO:0019219	regulation of nucleobase-containing complexes	2192	59	34.22	3.9e-08	BP	9
GO:0031326	regulation of cellular biosynthetic process	2409	68	37.61	7.3e-08	BP	9
GO:0019438	aromatic compound biosynthetic process	2669	67	41.67	2.2e-06	BP	9
GO:0018130	heterocycle biosynthetic process	2706	66	42.25	2.5e-06	BP	9
GO:0065007	biological regulation	5019	112	78.36	5.2e-06	BP	9
GO:0044271	cellular nitrogen compound biosynthetic process	3527	78	55.07	5.4e-06	BP	9
GO:0050794	regulation of cellular process	4264	96	66.58	8e-06	BP	9
GO:0051171	regulation of nitrogen compound metabolic process	2797	67	43.67	1e-05	BP	9
GO:1901362	organic cyclic compound biosynthetic process	2893	69	45.17	2.2e-05	BP	9
GO:0050789	regulation of biological process	4556	101	71.13	3.1e-05	BP	9
GO:2001141	regulation of RNA biosynthetic process	1829	59	28.56	4.4e-05	BP	9
GO:0031323	regulation of cellular metabolic process	2919	70	45.58	0.00012	BP	9
GO:0090693	plant organ senescence	47	6	0.73	0.00014	BP	9
GO:0009719	response to endogenous stimulus	674	23	10.52	0.00014	BP	9
GO:0009311	oligosaccharide metabolic process	475	18	7.42	0.00022	BP	9
GO:0022611	dormancy process	18	4	0.28	0.00023	BP	9
GO:0060255	regulation of macromolecule metabolic process	2943	68	45.95	0.00024	BP	9
GO:0010431	seed maturation	23	4	0.36	0.00027	BP	9
GO:0010162	seed dormancy process	18	4	0.28	0.00027	BP	9
GO:0005667	transcription regulator complex	1050	41	17.19	4.6e-09	CC	9
GO:0140110	transcription regulator activity	1019	41	15.38	9.2e-09	MF	9
GO:0003677	DNA binding	2257	57	34.06	3.2e-05	MF	9
GO:0120254	olefinic compound metabolic process	120	10	1.2	9.4e-08	BP	12
GO:0120255	olefinic compound biosynthetic process	77	9	0.77	1.1e-07	BP	12
GO:0009698	phenylpropanoid metabolic process	114	10	1.14	2.8e-07	BP	12
GO:0042537	benzene-containing compound metabolic process	160	11	1.6	8.6e-07	BP	12
GO:0009699	phenylpropanoid biosynthetic process	78	8	0.78	1.3e-06	BP	12
GO:0006730	one-carbon metabolic process	56	7	0.56	1.6e-06	BP	12
GO:0044272	sulfur compound biosynthetic process	143	10	1.43	2.7e-06	BP	12
GO:0170038	proteinogenic amino acid biosynthetic process	258	13	2.59	4.9e-06	BP	12
GO:0006091	generation of precursor metabolites	744	22	7.45	7.2e-06	BP	12
GO:0009811	stilbene biosynthetic process	47	6	0.47	8.4e-06	BP	12
GO:0009804	coumarin metabolic process	47	6	0.47	9.3e-06	BP	12
GO:0009805	coumarin biosynthetic process	47	6	0.47	1e-05	BP	12
GO:0000096	sulfur amino acid metabolic process	107	8	1.07	1e-05	BP	12
GO:0019748	secondary metabolic process	194	10	1.94	1.5e-05	BP	12
GO:0044036	cell wall macromolecule metabolic process	167	8	1.67	1.5e-05	BP	12
GO:0046500	S-adenosylmethionine metabolic process	19	4	0.19	2e-05	BP	12
GO:0008652	amino acid biosynthetic process	286	13	2.87	2.1e-05	BP	12
GO:0032504	multicellular organism reproduction	171	9	1.71	2.5e-05	BP	12
GO:1901607	alpha-amino acid biosynthetic process	305	13	3.06	2.6e-05	BP	12
GO:0042546	cell wall biogenesis	212	9	2.12	4e-05	BP	12
GO:0170034	L-amino acid biosynthetic process	258	13	2.59	6.5e-05	BP	12
GO:0022412	cellular process involved in reproduction	127	8	1.27	6.7e-05	BP	12
GO:0016053	organic acid biosynthetic process	637	18	6.38	8.9e-05	BP	12
GO:0044283	small molecule biosynthetic process	984	23	9.86	9e-05	BP	12
GO:0009072	aromatic amino acid metabolic process	256	10	2.57	9.4e-05	BP	12
GO:0000271	polysaccharide biosynthetic process	218	9	2.18	0.0001	BP	12
GO:0170040	proteinogenic amino acid catabolic process	53	6	0.53	0.00011	BP	12
GO:0006790	sulfur compound metabolic process	367	13	3.68	0.00011	BP	12
GO:0044550	secondary metabolite biosynthetic process	137	8	1.37	0.00012	BP	12
GO:0009071	serine family amino acid catabolic process	26	4	0.26	0.00013	BP	12
GO:0006556	S-adenosylmethionine biosynthetic process	10	3	0.1	0.00015	BP	12
GO:0170035	L-amino acid catabolic process	53	6	0.53	0.00016	BP	12
GO:0005976	polysaccharide metabolic process	637	14	6.38	0.00016	BP	12
GO:0090376	seed trichome differentiation	86	7	0.86	0.00022	BP	12
GO:0006544	glycine metabolic process	110	6	1.1	0.00022	BP	12
GO:0006082	organic acid metabolic process	2479	40	24.84	0.00029	BP	12
GO:1990204	oxidoreductase complex	179	8	1.94	2.4e-05	CC	12
GO:0005737	cytoplasm	6504	96	70.47	2.7e-05	CC	12
GO:0005829	cytosol	1410	32	15.28	5.4e-05	CC	12
GO:0070469	respirasome	125	8	1.35	7.3e-05	CC	12
GO:0009346	ATP-independent citrate lyase complex	3	2	0.03	0.00017	CC	12
GO:0098803	respiratory chain complex	106	8	1.15	0.00021	CC	12
GO:1990351	transporter complex	115	6	1.25	0.00025	CC	12
GO:0071840	cellular component organization or biogenesis	2895	58	20.47	3.3e-18	BP	14
GO:0006412	translation	965	34	6.82	1.5e-15	BP	14
GO:0043604	amide biosynthetic process	1081	35	7.64	2.5e-15	BP	14
GO:0043603	amide metabolic process	1298	35	9.18	5.3e-14	BP	14
GO:0006518	peptide metabolic process	1094	34	7.73	1.3e-12	BP	14
GO:1901566	organonitrogen compound biosynthetic process	1981	39	14	6.1e-11	BP	14
GO:0043043	peptide biosynthetic process	976	34	6.9	1.1e-07	BP	14
GO:0044085	cellular component biogenesis	1678	50	11.86	2.8e-06	BP	14
GO:0090358	positive regulation of tryptophan metabolic process	2	2	0.01	3.9e-06	BP	14
GO:0032352	positive regulation of hormone metabolic process	2	2	0.01	3.9e-06	BP	14
GO:0019538	protein metabolic process	4839	55	34.21	4.2e-06	BP	14
GO:0090355	positive regulation of auxin metabolic process	2	2	0.01	6.2e-06	BP	14
GO:0033240	positive regulation of amine metabolic process	2	2	0.01	9.6e-06	BP	14
GO:0045764	positive regulation of amino acid metabolc prcoess	2	2	0.01	4.1e-05	BP	14
GO:0090357	regulation of tryptophan metabolic process	2	2	0.01	6.2e-05	BP	14
GO:0032350	regulation of hormone metabolic process	4	2	0.03	9.1e-05	BP	14
GO:0090354	regulation of auxin metabolic process	4	2	0.03	9.2e-05	BP	14
GO:0033238	regulation of amine metabolic process	4	2	0.03	0.0001	BP	14
GO:0006521	regulation of cellular amino acid metabolic process	4	2	0.03	0.00014	BP	14
GO:0043228	non-membrane-bounded organelle	2498	46	18.24	4e-13	CC	14
GO:0043232	intracellular non-membrane-bounded organelle	2498	46	18.24	4.3e-13	CC	14
GO:0005840	ribosome	829	33	6.05	7.7e-08	CC	14
GO:0055044	symplast	449	14	3.28	6.1e-06	CC	14
GO:0030054	cell junction	454	14	3.31	6.9e-06	CC	14
GO:1990904	ribonucleoprotein complex	597	13	4.36	2.6e-05	CC	14
GO:0005198	structural molecule activity	671	37	4.13	1.8e-25	MF	14
GO:0000271	polysaccharide biosynthetic process	218	14	1.1	2.2e-14	BP	15
GO:0005976	polysaccharide metabolic process	637	17	3.21	5.4e-11	BP	15
GO:0009698	phenylpropanoid metabolic process	114	10	0.57	1e-10	BP	15
GO:0042546	cell wall biogenesis	212	13	1.07	3.9e-10	BP	15
GO:0022412	cellular process involved in reproduction	127	10	0.64	6.6e-10	BP	15
GO:0044036	cell wall macromolecule metabolic process	167	10	0.84	9.5e-10	BP	15
GO:0071554	cell wall organization or biogenesis	473	16	2.38	1.1e-09	BP	15
GO:0009699	phenylpropanoid biosynthetic process	78	8	0.39	1.8e-09	BP	15
GO:0019748	secondary metabolic process	194	11	0.98	4.8e-09	BP	15
GO:0006730	one-carbon metabolic process	56	7	0.28	1.1e-08	BP	15
GO:0009805	coumarin biosynthetic process	47	6	0.24	2.9e-08	BP	15
GO:0009811	stilbene biosynthetic process	47	6	0.24	3.4e-08	BP	15
GO:0009804	coumarin metabolic process	47	6	0.24	8.1e-08	BP	15
GO:0044550	secondary metabolite biosynthetic process	137	9	0.69	1.5e-07	BP	15
GO:0120255	olefinic compound biosynthetic process	77	7	0.39	3.6e-07	BP	15
GO:0016051	carbohydrate biosynthetic process	469	14	2.36	4.1e-07	BP	15
GO:0090376	seed trichome differentiation	86	10	0.43	5.2e-07	BP	15
GO:0032504	multicellular organism reproduction	171	10	0.86	6.5e-07	BP	15
GO:0000096	sulfur amino acid metabolic process	107	7	0.54	9.5e-07	BP	15
GO:0048869	cellular developmental process	353	11	1.78	1.2e-06	BP	15
GO:0007010	cytoskeleton organization	342	10	1.72	1.6e-06	BP	15
GO:0046500	S-adenosylmethionine metabolic process	19	4	0.1	2.7e-06	BP	15
GO:0120254	olefinic compound metabolic process	120	7	0.6	3.3e-06	BP	15
GO:0009071	serine family amino acid catabolic process	26	4	0.13	6.8e-06	BP	15
GO:0005975	carbohydrate metabolic process	1327	20	6.69	1.1e-05	BP	15
GO:0010026	trichome differentiation	95	10	0.48	1.1e-05	BP	15
GO:0042537	benzene-containing compound metabolic process	160	7	0.81	1.2e-05	BP	15
GO:0016049	cell growth	229	8	1.15	1.9e-05	BP	15
GO:0003006	developmental process involved in reproduction	550	13	2.77	2.2e-05	BP	15
GO:0032259	methylation	478	11	2.41	3.6e-05	BP	15
GO:0010035	response to inorganic substance	433	15	2.18	4.2e-05	BP	15
GO:0022414	reproductive process	699	13	3.52	4.4e-05	BP	15
GO:0000003	reproduction	711	13	3.58	5.2e-05	BP	15
GO:1904482	cellular response to tetrahydrofolate	9	3	0.05	5.8e-05	BP	15
GO:0006011	UDP-glucose metabolic process	53	4	0.27	7.1e-05	BP	15
GO:0071417	cellular response to organonitrogen compounds	15	3	0.08	7.6e-05	BP	15
GO:0006555	methionine metabolic process	56	7	0.28	0.0001	BP	15
GO:0009888	tissue development	255	10	1.29	0.00011	BP	15
GO:0040007	growth	295	8	1.49	0.00012	BP	15
GO:0170039	proteinogenic amino acid metabolic process	1512	18	7.62	0.00016	BP	15
GO:0009225	nucleotide-sugar metabolic process	108	6	0.54	0.00017	BP	15
GO:0008652	amino acid biosynthetic process	286	8	1.44	0.0002	BP	15
GO:0170038	proteinogenic amino acid biosynthetic process	258	8	1.3	0.00021	BP	15
GO:0000910	cytokinesis	66	4	0.33	0.00023	BP	15
GO:0046655	folic acid metabolic process	32	3	0.16	0.00024	BP	15
GO:0051273	beta-glucan metabolic process	117	9	0.59	0.00025	BP	15
GO:1904481	response to tetrahydrofolate	9	3	0.05	0.00027	BP	15
GO:0090378	seed trichome elongation	53	6	0.27	0.0003	BP	15
GO:1901605	alpha-amino acid metabolic process	1744	19	8.79	0.00032	BP	15
GO:0045229	external encapsulating structure organization	334	9	1.68	0.00032	BP	15
GO:0042221	response to chemical	1432	20	7.22	0.00054	BP	15
GO:0005829	cytosol	1410	24	6.83	1.6e-08	CC	15
GO:0005773	vacuole	506	14	2.45	2.4e-07	CC	15
GO:0071944	cell periphery	2052	27	9.93	3.3e-07	CC	15
GO:0005794	Golgi apparatus	955	18	4.62	9.6e-07	CC	15
GO:0005886	plasma membrane	1806	26	8.74	1.4e-06	CC	15
GO:0005737	cytoplasm	6504	49	31.49	6.5e-06	CC	15
GO:0005856	cytoskeleton	477	10	2.31	9.7e-06	CC	15
GO:0055044	symplast	449	11	2.17	9.9e-06	CC	15
GO:0030054	cell junction	454	11	2.2	1.1e-05	CC	15
GO:0012505	endomembrane system	1775	22	8.59	1.9e-05	CC	15
GO:0030312	external encapsulating structure	266	8	1.29	4.4e-05	CC	15
GO:0005819	spindle	93	5	0.45	6.5e-05	CC	15
GO:0005200	structural constituent of cytoskeleton	50	5	0.22	1.1e-05	MF	15
GO:0042084	5-methyltetrahydrofolate-dependent methylation	4	3	0.02	2.9e-05	MF	15
GO:0070905	serine binding	9	3	0.04	3.4e-05	MF	15
GO:0016192	vesicle-mediated transport	537	18	4.06	1.7e-07	BP	16
GO:0030029	actin filament-based process	126	8	0.95	6.7e-06	BP	16
GO:0098657	import into cell	85	7	0.64	1.9e-05	BP	16
GO:0005856	cytoskeleton	477	17	3.56	1.1e-07	CC	16
GO:0005905	clathrin-coated pit	38	5	0.28	3.7e-06	CC	16
GO:0099080	supramolecular complex	325	12	2.42	4.9e-06	CC	16
GO:0005938	cell cortex	106	6	0.79	8.8e-05	CC	16
GO:0031982	vesicle	516	13	3.85	0.00012	CC	16
GO:0045298	tubulin complex	197	9	1.47	0.00029	CC	16
GO:0008092	cytoskeletal protein binding	329	17	2.02	5.8e-08	MF	16
GO:0009698	phenylpropanoid metabolic process	114	7	0.29	3.8e-08	BP	17
GO:0019748	secondary metabolic process	194	8	0.5	4.8e-08	BP	17
GO:0044550	secondary metabolite biosynthetic process	137	6	0.35	1.3e-06	BP	17
GO:0009699	phenylpropanoid biosynthetic process	78	5	0.2	2.5e-06	BP	17
GO:0005576	extracellular region	351	8	0.84	1.5e-06	CC	17
GO:0071840	cellular component organization or biogenesis	2895	32	14.77	1e-05	BP	20
GO:0031099	regeneration	6	3	0.03	1.7e-05	BP	20
GO:0043604	amide biosynthetic process	1081	13	5.52	2.2e-05	BP	20
GO:0005198	structural molecule activity	671	14	3.12	2.5e-06	MF	20

## Sheet: S2D
Cluster	Number of cells in the control sample	Number of cells in nitrate treated sample
0	1372	1352
1	1421	723
2	980	1036
3	434	1531
4	1188	607
5	1216	433
6	910	587
7	838	447
8	712	443
9	353	550
10	287	242
11	261	254
12	289	98
13	159	216
14	206	130
15	241	79
16	226	91
17	191	104
18	119	49
19	87	55
20	24	25

## Sheet: S2E
GeneId	Average_Log2_fold_change	Level after nitrate treatment	Cluster number	Percent cells in nitrate treated sample	Percent cells in control	False Discovery Rate	Best Arabidospis hit	TAIR_Description	UniProt description	Transcription factor
Potra2n10c20485	1.01667	Upregulated	1	0.126	0.048	6.41644e-06	AT2G28550	related to AP2.7|RAP2.7,TOE1	sp|Q8W3M3|RAP29_ARATH Ethylene-responsive transcription factor RAP2-9 OS=Arabidopsis thaliana OX=3702 GN=RAP2-9 PE=2 SV=1	AP2-EREBP
Potra2n5c12062	1.23085	Upregulated	1	0.856	0.444	3.5376e-70	AT5G64750	Integrase-type DNA-binding superfamily protein|ABR1	sp|Q84TB5|AP22_ORYSJ APETALA2-like protein 2 OS=Oryza sativa subsp. japonica OX=39947 GN=AP2-2 PE=1 SV=1	AP2-EREBP
Potra2n13c25901	1.38352	Upregulated	1	0.16	0.05	1.40987e-12	AT3G23240	ethylene response factor 1|ATERF1,ERF1	sp|Q9FGC9|EF121_ARATH Putative ethylene-responsive transcription factor ERF121 OS=Arabidopsis thaliana OX=3702 GN=ERF121 PE=3 SV=1	AP2-EREBP
Potra2n5c11113	1.38748	Upregulated	1	0.278	0.089	2.48319e-24	AT5G50080	ethylene response factor 110|ERF110	sp|Q2TQ34|AP21_ORYSJ APETALA2-like protein 1 OS=Oryza sativa subsp. japonica OX=39947 GN=AP2-1 PE=1 SV=1	AP2-EREBP
Potra2n15c29002	2.54817	Upregulated	1	0.108	0.015	3.38934e-17	AT4G27950	cytokinin response factor 4|CRF4	sp|Q8H443|AP23_ORYSJ APETALA2-like protein 3 OS=Oryza sativa subsp. japonica OX=39947 GN=AP2-3 PE=1 SV=1	AP2-EREBP
Potra2n4c9349	1.25437	Upregulated	1	0.134	0.041	4.2342e-10	AT3G02550	LOB domain-containing protein 41|LBD41	sp|Q9FKZ3|LBD36_ARATH LOB domain-containing protein 36 OS=Arabidopsis thaliana OX=3702 GN=LBD36 PE=2 SV=1	AS2-LOB
Potra2n9c19330	1.81994	Upregulated	1	0.311	0.075	4.88412e-40	AT3G49940	LOB domain-containing protein 38|LBD38	sp|Q9CA30|LBD42_ARATH LOB domain-containing protein 42 OS=Arabidopsis thaliana OX=3702 GN=LBD42 PE=2 SV=1	AS2-LOB
Potra2n18c32296	1.01991	Upregulated	1	0.189	0.066	1.06316e-12	AT2G24260	LJRHL1-like 1|LRL1	sp|Q9S7Y1|BH030_ARATH Transcription factor bHLH30 OS=Arabidopsis thaliana OX=3702 GN=BHLH30 PE=1 SV=1	bHLH
Potra2n6c14701	1.03021	Upregulated	1	0.9	0.581	3.76722e-59	AT5G57150	basic helix-loop-helix (bHLH) DNA-binding superfamily protein	sp|Q8S3F1|BH020_ARATH Transcription factor NAI1 OS=Arabidopsis thaliana OX=3702 GN=NAI1 PE=2 SV=1	bHLH
Potra2n1c2330	1.09379	Upregulated	1	0.101	0.033	6.64533e-06	AT2G42280	basic helix-loop-helix (bHLH) DNA-binding superfamily protein	sp|Q9C8P8|BH080_ARATH Transcription factor bHLH80 OS=Arabidopsis thaliana OX=3702 GN=BHLH80 PE=2 SV=1	bHLH
Potra2n18c32068	1.29511	Upregulated	1	0.379	0.127	2.52609e-33	AT5G57150	basic helix-loop-helix (bHLH) DNA-binding superfamily protein	sp|A0A3Q7HES4|MTB2_SOLLC Transcription factor MTB2 OS=Solanum lycopersicum OX=4081 GN=MTB2 PE=2 SV=1	bHLH
Potra2n4c8651	1.32498	Upregulated	1	0.195	0.053	8.84376e-19	AT1G61660	basic helix-loop-helix (bHLH) DNA-binding superfamily protein	sp|Q2QQ32|BH133_ORYSJ Transcription factor BHLH133 OS=Oryza sativa subsp. japonica OX=39947 GN=BHLH133 PE=2 SV=1	bHLH
Potra2n9c19481	3.30341	Upregulated	1	0.402	0.032	1.25825e-102	AT2G42280	basic helix-loop-helix (bHLH) DNA-binding superfamily protein	sp|Q84WK0|BH085_ARATH Transcription factor bHLH85 OS=Arabidopsis thaliana OX=3702 GN=BHLH85 PE=2 SV=1	bHLH
Potra2n14c27078	1.02325	Upregulated	1	0.325	0.122	1.00396e-21	AT3G61600	POZ/BTB containin G-protein 1|ATPOB1,POB1	sp|Q80TF4|KLH13_MOUSE Kelch-like protein 13 OS=Mus musculus OX=10090 GN=Klhl13 PE=2 SV=3	BTB-POZ
Potra2n3c7255	1.65992	Upregulated	1	0.102	0.027	4.75514e-09	AT5G41790	COP1-interactive protein 1	sp|F4JZY1|CIP1_ARATH COP1-interactive protein 1 OS=Arabidopsis thaliana OX=3702 GN=CIP1 PE=1 SV=1	bZIP
Potra2n9c19823	1.0271	Upregulated	1	0.729	0.343	1.96758e-47	AT3G46620	zinc finger (C3HC4-type RING finger) family protein	sp|O64762|ATL38_ARATH RING-H2 finger protein ATL38 OS=Arabidopsis thaliana OX=3702 GN=ATL38 PE=2 SV=1	C2H2
Potra2n12c24705	1.15124	Upregulated	1	0.249	0.095	1.61197e-15	AT5G45100	SBP (S-ribonuclease binding protein) family protein	sp|F4IDI6|BRG2_ARATH Probable BOI-related E3 ubiquitin-protein ligase 2 OS=Arabidopsis thaliana OX=3702 GN=BRG2 PE=1 SV=1	C2H2
Potra2n19c33634	1.16395	Upregulated	1	0.17	0.059	2.22248e-11	AT1G71980	Protease-associated (PA) RING/U-box zinc finger family protein	sp|Q93Z92|RING4_ARATH E3 ubiquitin-protein ligase At4g11680 OS=Arabidopsis thaliana OX=3702 GN=At4g11680 PE=2 SV=1	C2H2
Potra2n13c25638	1.29758	Upregulated	1	0.109	0.034	2.54151e-07	AT5G17600	RING/U-box superfamily protein	sp|Q6AVN2|SIRP1_ORYSJ E3 ubiquitin-protein ligase SIRP1 OS=Oryza sativa subsp. japonica OX=39947 GN=SIRP1 PE=1 SV=1	C2H2
Potra2n9c18863	1.49246	Upregulated	1	0.288	0.08	3.6247e-30	AT1G08290	WIP domain protein 3|WIP3	sp|Q80W31|ZN569_MOUSE Zinc finger protein 569 OS=Mus musculus OX=10090 GN=Znf569 PE=2 SV=2	C2H2
Potra2n9c18729	1.19562	Upregulated	1	0.219	0.06	5.10881e-21	AT3G20770	Ethylene insensitive 3 family protein|AtEIN3,EIN3	sp|Q9FJQ5|EIL5_ARATH ETHYLENE INSENSITIVE 3-like 5 protein OS=Arabidopsis thaliana OX=3702 GN=EIL5 PE=2 SV=1	EIL
Potra2n8c17839	1.23432	Upregulated	1	0.129	0.042	1.4381e-08	AT1G14920	GRAS family transcription factor family protein|GAI,RGA2	sp|Q9LRW3|SCL29_ARATH Scarecrow-like protein 29 OS=Arabidopsis thaliana OX=3702 GN=SCL29 PE=2 SV=1	GRAS
Potra2n5c11185	1.27736	Upregulated	1	0.261	0.087	1.07499e-20	AT1G21450	SCARECROW-like 1|SCL1	sp|O23210|SCL15_ARATH Scarecrow-like protein 15 OS=Arabidopsis thaliana OX=3702 GN=SCL15 PE=1 SV=3	GRAS
Potra2n17c30701	1.38815	Upregulated	1	0.205	0.061	9.82431e-19	AT5G52510	SCARECROW-like 8|SCL8	sp|Q2V2T9|SCL16_ARATH Putative scarecrow-like protein 16 OS=Arabidopsis thaliana OX=3702 GN=SCL16 PE=5 SV=1	GRAS
Potra2n10c21453	1.02299	Upregulated	1	0.116	0.042	5.89657e-06	AT2G01430	homeobox-leucine zipper protein 17|ATHB-17,ATHB17,HB17	sp|Q6H6S3|HOX24_ORYSJ Homeobox-leucine zipper protein HOX24 OS=Oryza sativa subsp. japonica OX=39947 GN=HOX24 PE=2 SV=1	Homobox-WOX
Potra2n7c16575	1.2548	Upregulated	1	0.332	0.118	2.792e-25	AT4G37790	Homeobox-leucine zipper protein family|HAT22	sp|Q6H6S3|HOX24_ORYSJ Homeobox-leucine zipper protein HOX24 OS=Oryza sativa subsp. japonica OX=39947 GN=HOX24 PE=2 SV=1	Homobox-WOX
Potra2n1c908	1.27019	Upregulated	1	0.166	0.055	6.5091e-12	AT5G62020	heat shock transcription factor B2A|AT-HSFB2A,HSFB2A	sp|A0A1B0GWH4|HSFX3_HUMAN Heat shock transcription factor, X-linked member 3 OS=Homo sapiens OX=9606 GN=HSFX3 PE=3 SV=1	HSF-type-DNA-bin
Potra2n3c7648	1.37904	Upregulated	1	0.445	0.144	4.79333e-43	AT5G46910	Transcription factor jumonji (jmj) family protein / zinc finger (C5HC2 type) family protein	sp|Q03214|ECM5_YEAST Protein ECM5 OS=Saccharomyces cerevisiae (strain ATCC 204508 / S288c) OX=559292 GN=ECM5 PE=1 SV=1	JmjC
Potra2n16c30327	1.33659	Upregulated	1	0.596	0.223	1.00449e-52	AT2G38250	Homeodomain-like superfamily protein	sp|Q9LZS0|PTL_ARATH Trihelix transcription factor PTL OS=Arabidopsis thaliana OX=3702 GN=PTL PE=1 SV=1	MYB
Potra2n1c535	2.08494	Upregulated	1	0.126	0.022	7.64186e-18	AT2G33550	Homeodomain-like superfamily protein	sp|Q39117|TGT2_ARATH Trihelix transcription factor GT-2 OS=Arabidopsis thaliana OX=3702 GN=GT-2 PE=2 SV=1	MYB
Potra2n4c9980	-1.09099	Downregulated	1	0.238	0.357	2.71152e-08	AT4G38620	myb domain protein 4|ATMYB4,MYB4	sp|Q9LNI5|ETC1_ARATH MYB-like transcription factor ETC1 OS=Arabidopsis thaliana OX=3702 GN=ETC1 PE=2 SV=1	MYB-HB-like
Potra2n12c24342	1.01816	Upregulated	1	0.102	0.04	0.000632059	AT1G19000	Homeodomain-like superfamily protein	sp|Q54HX6|MYBI_DICDI Myb-like protein I OS=Dictyostelium discoideum OX=44689 GN=mybI PE=3 SV=1	MYB-HB-like
Potra2n14c27343	1.03515	Upregulated	1	0.116	0.042	8.39836e-06	AT5G49330	myb domain protein 111|ATMYB111,MYB111,PFG3	sp|P80074|MYB1_PHYPA Myb-related protein Pp1 (Fragment) OS=Physcomitrella patens subsp. patens OX=3218 GN=PP1 PE=2 SV=1	MYB-HB-like
Potra2n5c11718	1.67289	Upregulated	1	0.105	0.023	2.29353e-11	AT1G19510	RAD-like 5|ATRL5,RL5,RSM4	sp|Q9FNN6|SRM1_ARATH Transcription factor SRM1 OS=Arabidopsis thaliana OX=3702 GN=SRM1 PE=1 SV=1	MYB-HB-like
Potra2n3c6990	1.17822	Upregulated	1	0.335	0.105	3.90551e-30	AT5G13180	NAC domain containing protein 83|ANAC083,NAC083,VNI2	sp|O49459|NAC73_ARATH NAC domain-containing protein 73 OS=Arabidopsis thaliana OX=3702 GN=NAC073 PE=2 SV=1	NAM
Potra2n5c11119	1.07803	Upregulated	1	0.4	0.168	1.75778e-23	AT4G39350	cellulose synthase(cesa) A2|ATCESA2,ATH-A,CESA2	sp|Q9U720|DCSA_DICDI Cellulose synthase catalytic subunit A [UDP-forming] OS=Dictyostelium discoideum OX=44689 GN=dcsA PE=1 SV=1	PHD
Potra2n4c10257	1.16486	Upregulated	1	0.14	0.049	1.90685e-08	AT5G60410	DNA-binding protein with MIZ/SP-RING zinc finger, PHD-finger and SAP domain-containing protein|ATSIZ1,SIZ1	sp|Q6ASW7|SIZ2_ORYSJ E3 SUMO-protein ligase SIZ2 OS=Oryza sativa subsp. japonica OX=39947 GN=SIZ2 PE=2 SV=1	PHD
Potra2n16c29552	2.36978	Upregulated	1	0.104	0.014	7.97322e-17	AT3G57040	response regulator 9	sp|Q8CQ17|SAER_STAES Response regulator SaeR OS=Staphylococcus epidermidis (strain ATCC 12228) OX=176280 GN=saeR PE=1 SV=1	RR-A-type
Potra2n5c10502	3.04238	Upregulated	1	0.206	0.015	5.9714e-48	AT1G21000	PLATZ transcription factor family protein		Znf-B
Potra2n6c14433	1.57755	Upregulated	1	0.581	0.203	1.98004e-59	AT2G38290	ammonium transporter 2|AMT2,AMT2;1,ATAMT2	sp|Q19KH7|RHCG_GASAC Ammonium transporter Rh type C OS=Gasterosteus aculeatus OX=69293 GN=rhcg PE=2 SV=1
Potra2n18c32565	1.87123	Upregulated	1	0.58	0.171	1.23982e-76	AT5G19550	aspartate aminotransferase 2|AAT2,ASP2	sp|Q7TSV6|AATC2_MOUSE Putative aspartate aminotransferase, cytoplasmic 2 OS=Mus musculus OX=10090 GN=Got1l1 PE=2 SV=1
Potra2n12c24793	2.2891	Upregulated	1	0.109	0.016	6.01006e-17	AT4G21120	amino acid transporter 1	sp|Q46065|AROP_CORGL Aromatic amino acid transport protein AroP OS=Corynebacterium glutamicum (strain ATCC 13032 / DSM 20300 / JCM 1318 / LMG 3730 / NCIMB 10025) OX=196627 GN=aroP PE=3 SV=1
Potra2n8c18472	1.61454	Upregulated	1	0.391	0.112	4.28346e-44	AT5G35630	glutamine synthetase 2|ATGSL1,GLN2,GS2	sp|Q9CDL9|GLN1A_LACLA Glutamine synthetase OS=Lactococcus lactis subsp. lactis (strain IL1403) OX=272623 GN=glnA PE=3 SV=1
Potra2n12c23912	2.6852	Upregulated	1	0.221	0.025	2.85945e-45	AT5G53460	NADH-dependent glutamate synthase 1|GLT1	sp|Q58931|TRXB_METJA Putative thioredoxin reductase OS=Methanocaldococcus jannaschii (strain ATCC 43067 / DSM 2661 / JAL-1 / JCM 10045 / NBRC 100440) OX=243232 GN=MJ1536 PE=3 SV=1
Potra2n6c15083	1.86553	Upregulated	1	0.142	0.031	3.40428e-17	AT5G04140	glutamate synthase 1|FD-GOGAT,GLS1,GLU1,GLUS	sp|O34849|YERD_BACSU Glutamate synthase large subunit-like protein YerD OS=Bacillus subtilis (strain 168) OX=224308 GN=yerD PE=3 SV=1
Potra2n4c9696	6.20256	Upregulated	1	0.757	0.015	4.50606e-285	AT2G15620	nitrite reductase 1|ATHNIR,NIR,NIR1	sp|P21637|COBG_SINSX Precorrin-3B synthase OS=Sinorhizobium sp. OX=42445 GN=cobG PE=3 SV=2
Potra2n2c5606	5.87218	Upregulated	1	0.275	0.005	8.7579e-85	AT1G37130	nitrate reductase 2|ATNR2,B29,CHL3,NIA2,NIA2-1,NR,NR2	sp|Q9LXD1|RLF_ARATH Cytochrome b5 domain-containing protein RLF OS=Arabidopsis thaliana OX=3702 GN=RLF PE=2 SV=1
Potra2n3c7503	4.2114	Upregulated	1	0.183	0.011	5.72367e-45	AT1G12110	nitrate transporter 1.1|ATNRT1,B-1,CHL1,CHL1-1,NRT1,NRT1.1	sp|B8NI27|IMQJ_ASPFN Peptide transporter imqJ OS=Aspergillus flavus (strain ATCC 200026 / FGSC A1120 / NRRL 3357 / JCM 12722 / SRRC 167) OX=332952 GN=imqJ PE=2 SV=1
Potra2n9c20041	6.5363	Upregulated	1	0.191	0.001	1.23166e-58	AT1G08090	nitrate transporter 2:1|ACH1,ATNRT2.1,ATNRT2:1,LIN1,NRT2,NRT2.1,NRT2:1,NRT2;1AT	sp|P42432|NASA_BACSU Nitrate transporter OS=Bacillus subtilis (strain 168) OX=224308 GN=nasA PE=2 SV=2
Potra2n15c28440	6.01643	Upregulated	1	0.397	0.008	8.19055e-129	AT5G50200	nitrate transmembrane transporter|ATNRT3.1,NRT3.1,WR3	sp|Q7XK12|NAR22_ORYSJ Probable high-affinity nitrate transporter-activating protein 2.2 OS=Oryza sativa subsp. japonica OX=39947 GN=NAR2.2 PE=2 SV=1
Potra2n1c2237	1.60014	Upregulated	1	0.154	0.041	4.42474e-15	AT5G04590	sulfite reductase|SIR	sp|P38500|NIR_BETPN Ferredoxin--nitrite reductase, chloroplastic OS=Betula pendula OX=3505 GN=NIR1 PE=2 SV=1
Potra2n5c11311	-2.74164	Downregulated	1	0.059	0.213	6.39733e-17	AT1G77720	putative protein kinase 1|PPK1	sp|Q54XY6|Y0019_DICDI Probable serine/threonine-protein kinase DDB_G0278521 OS=Dictyostelium discoideum OX=44689 GN=DDB_G0278521 PE=3 SV=1
Potra2n12c24072	-2.60269	Downregulated	1	0.036	0.124	3.77247e-07	AT3G17790	purple acid phosphatase 17|ATACP5,ATPAP17,PAP17	sp|O97860|PPA5_RABIT Tartrate-resistant acid phosphatase type 5 OS=Oryctolagus cuniculus OX=9986 GN=ACP5 PE=2 SV=1
Potra2n18c32121	-2.36712	Downregulated	1	0.033	0.115	2.75632e-06	AT2G26660	SPX domain-containing protein 2 (SPX2)|ATSPX2,SPX2	sp|Q28CY9|XPR1_XENTR Xenotropic and polytropic retrovirus receptor 1 homolog OS=Xenopus tropicalis OX=8364 GN=xpr1 PE=2 SV=1
Potra2n6c15076	-1.81066	Downregulated	1	0.154	0.308	1.32971e-14	AT1G68060	microtubule-associated proteins 70-1|ATMAP70-1,MAP70-1	sp|Q8GYX3|MP705_ARATH Microtubule-associated protein 70-5 OS=Arabidopsis thaliana OX=3702 GN=MAP70.5 PE=1 SV=1
Potra2n7c16513	-1.78083	Downregulated	1	0.27	0.464	7.78626e-25	AT2G18050	histone H1-3|HIS1-3	sp|Q08864|H11_VOLCA Histone H1-I OS=Volvox carteri OX=3067 GN=H1-I PE=2 SV=3
Potra2n3c6926	-1.72128	Downregulated	1	0.148	0.277	2.71604e-10	AT1G67360	Rubber elongation factor protein (REF)	sp|P15252|REF_HEVBR Rubber elongation factor protein OS=Hevea brasiliensis OX=3981 PE=1 SV=2
Potra2n15c28935	-1.70468	Downregulated	1	0.136	0.261	9.9594e-10	AT3G17790	purple acid phosphatase 17|ATACP5,ATPAP17,PAP17	sp|P09889|PPA5_PIG Tartrate-resistant acid phosphatase type 5 OS=Sus scrofa OX=9823 GN=ACP5 PE=1 SV=4
Potra2n8c18502	-1.48449	Downregulated	1	0.246	0.399	9.32968e-15	AT5G19140	aluminum induced protein with YGL and LRDR motifs|AILP1,ATAILP1	sp|Q54MB4|ASNS_DICDI Probable asparagine synthetase [glutamine-hydrolyzing] OS=Dictyostelium discoideum OX=44689 GN=asns PE=1 SV=1
Potra2n12c24367	-1.48235	Downregulated	1	0.271	0.394	8.03296e-11	AT5G14920	Gibberellin-regulated family protein	sp|P46690|GASA4_ARATH Gibberellin-regulated protein 4 OS=Arabidopsis thaliana OX=3702 GN=GASA4 PE=1 SV=2
Potra2n8c18344	-1.3866	Downregulated	1	0.12	0.215	8.91153e-05	AT1G67910	hypothetical protein
Potra2n8c17288	-1.34542	Downregulated	1	0.219	0.328	7.30981e-08	AT4G14270	polyadenylate-binding protein interacting protein	sp|Q39096|ERD15_ARATH Protein EARLY RESPONSIVE TO DEHYDRATION 15 OS=Arabidopsis thaliana OX=3702 GN=ERD15 PE=1 SV=1
Potra2n1c2826	-1.33067	Downregulated	1	0.38	0.545	1.96183e-23	AT3G02040	senescence-related gene 3|SRG3	sp|Q21407|GPCP1_CAEEL Putative glycerophosphocholine phosphodiesterase GPCPD1 homolog 1 OS=Caenorhabditis elegans OX=6239 GN=gpcp-1 PE=3 SV=2
Potra2n6c13323	-1.29283	Downregulated	1	0.178	0.265	0.000423323	AT4G33040	Thioredoxin superfamily protein	sp|Q7XIZ1|GRXC9_ORYSJ Glutaredoxin-C9 OS=Oryza sativa subsp. japonica OX=39947 GN=GRXC9 PE=3 SV=1
Potra2n426s35633	-1.28929	Downregulated	1	0.148	0.231	0.004444	AT4G27460	Cystathionine beta-synthase (CBS) family protein	sp|Q8GXI9|PV42B_ARATH SNF1-related protein kinase regulatory subunit gamma-like PV42b OS=Arabidopsis thaliana OX=3702 GN=PV42B PE=2 SV=1
Potra2n14c27782	-1.28056	Downregulated	1	0.122	0.221	3.65418e-05
Potra2n4c10223	-1.22368	Downregulated	1	0.162	0.241	0.00894613	AT2G17230	EXORDIUM like 5|EXL5	sp|Q9M8T8|EXOL6_ARATH Protein EXORDIUM-like 6 OS=Arabidopsis thaliana OX=3702 GN=EXL6 PE=3 SV=1
Potra2n1c3843	-1.21845	Downregulated	1	0.227	0.328	2.07458e-06	AT3G51510	transmembrane protein
Potra2n15c28782	-1.18348	Downregulated	1	0.292	0.398	4.60635e-09	AT5G16110	hypothetical protein
Potra2n14c26946	-1.14438	Downregulated	1	0.292	0.428	3.60368e-11	AT2G45760	BON association protein 2|BAL,BAP2	sp|Q941L2|BAP1_ARATH BON1-associated protein 1 OS=Arabidopsis thaliana OX=3702 GN=BAP1 PE=1 SV=1
Potra2n6c14818	-1.12948	Downregulated	1	0.18	0.262	0.00463282	AT1G60430	actin-related protein C3|ARPC3	sp|O15604|ARPC3_ENTHI Probable actin-related protein 2/3 complex subunit 3 (Fragment) OS=Entamoeba histolytica OX=5759 PE=2 SV=1
Potra2n13c25053	-1.12286	Downregulated	1	0.264	0.348	5.38573e-05	AT4G21450	PapD-like superfamily protein	sp|Q8LPQ7|VAP43_ARATH Vesicle-associated protein 4-3 OS=Arabidopsis thaliana OX=3702 GN=PVA43 PE=2 SV=1
Potra2n12c24490	-1.10276	Downregulated	1	0.375	0.433	0.000119211	AT4G24780	Pectin lyase-like superfamily protein	sp|Q4WL88|PLYC_ASPFU Probable pectate lyase C OS=Neosartorya fumigata (strain ATCC MYA-4609 / Af293 / CBS 101355 / FGSC A1100) OX=330879 GN=plyC PE=3 SV=1
Potra2n16c29511	-1.09318	Downregulated	1	0.228	0.307	0.00158426	AT4G09550	AtGCP3 interacting protein 1|ATGIP1,GIP1	sp|Q2GVR6|MZT1_CHAGB Mitotic-spindle organizing protein 1 OS=Chaetomium globosum (strain ATCC 6205 / CBS 148.51 / DSM 1962 / NBRC 6347 / NRRL 1970) OX=306901 GN=CHGG_07938 PE=3 SV=1
Potra2n1c1285	-1.05825	Downregulated	1	0.185	0.274	0.00162462	AT4G17670	senescence-associated family protein (DUF581)	sp|Q8GYX2|FLZ14_ARATH FCS-Like Zinc finger 14 OS=Arabidopsis thaliana OX=3702 GN=FLZ14 PE=1 SV=1
Potra2n2c4292	-1.02342	Downregulated	1	0.361	0.464	7.13119e-09	AT3G23730	xyloglucan endotransglucosylase/hydrolase 16|XTH16	sp|Q5AK54|CRH12_CANAL Extracellular glycosidase CRH12 OS=Candida albicans (strain SC5314 / ATCC MYA-2876) OX=237561 GN=CRH12 PE=1 SV=1
Potra2n7c15922	-1.0079	Downregulated	1	0.293	0.371	0.000235783	AT1G78020	senescence-associated family protein, putative (DUF581)	sp|Q9FH22|FLZ15_ARATH FCS-Like Zinc finger 15 OS=Arabidopsis thaliana OX=3702 GN=FLZ15 PE=1 SV=1
Potra2n10c21315	1.00128	Upregulated	1	0.108	0.04	6.56201e-05	AT1G68580	Agenet and bromo-adjacent homology (BAH) domain-containing protein	sp|Q9FFA0|DUF10_ARATH DUF724 domain-containing protein 10 OS=Arabidopsis thaliana OX=3702 GN=DUF10 PE=2 SV=1
Potra2n1c1729	1.00153	Upregulated	1	0.141	0.05	3.15057e-08	AT1G72810	Pyridoxal-5'-phosphate-dependent enzyme family protein	sp|P09123|THRC_BACSL Threonine synthase OS=Bacillus sp. (strain ULM1) OX=231717 GN=thrC PE=3 SV=1
Potra2n2c4883	1.00476	Upregulated	1	0.126	0.044	3.349e-07	AT4G01070	UDP-Glycosyltransferase superfamily protein|GT72B1,UGT72B1	sp|Q40286|UFOG4_MANES Anthocyanidin 3-O-glucosyltransferase 4 (Fragment) OS=Manihot esculenta OX=3983 GN=GT4 PE=2 SV=1
Potra2n1c173	1.00588	Upregulated	1	0.405	0.17	9.7528e-24	AT2G41540	6-phosphogluconate dehydrogenase family protein|GPDHC1	sp|Q4ZUV7|GPDA_PSEU2 Glycerol-3-phosphate dehydrogenase [NAD(P)+] OS=Pseudomonas syringae pv. syringae (strain B728a) OX=205918 GN=gpsA PE=3 SV=1
Potra2n9c18691	1.00652	Upregulated	1	0.65	0.31	5.0814e-38	AT2G27500	Glycosyl hydrolase superfamily protein	sp|P52397|E13J_TOBAC Glucan endo-1,3-beta-glucosidase, acidic isoform PR-O (Fragment) OS=Nicotiana tabacum OX=4097 GN=PR0 PE=1 SV=1
Potra2n16c30518	1.00984	Upregulated	1	0.124	0.049	1.42609e-05	AT3G08720	serine/threonine protein kinase 2	sp|Q555U5|Y4821_DICDI Probable inactive serine/threonine-protein kinase DDB_G0274821 OS=Dictyostelium discoideum OX=44689 GN=DDB_G0274821 PE=3 SV=1
Potra2n7c16374	1.01004	Upregulated	1	0.141	0.053	3.75763e-07	AT5G49530	SIN-like family protein	sp|O74883|RPC5_SCHPO DNA-directed RNA polymerase III subunit rpc5 OS=Schizosaccharomyces pombe (strain 972 / ATCC 24843) OX=284812 GN=rpc37 PE=3 SV=1
Potra2n19c33884	1.01507	Upregulated	1	0.113	0.047	0.000646085	AT3G56370	Leucine-rich repeat protein kinase family protein	sp|Q552C6|ZAK2_DICDI Dual specificity protein kinase zak2 OS=Dictyostelium discoideum OX=44689 GN=zak2 PE=1 SV=1
Potra2n10c22317	1.01671	Upregulated	1	0.207	0.08	6.93592e-12
Potra2n3c7236	1.01917	Upregulated	1	0.166	0.063	3.5539e-09	AT1G64390	glycosyl hydrolase 9C2|AtGH9C2,GH9C2	sp|P23666|GUN2_PERAE Endoglucanase 2 (Fragment) OS=Persea americana OX=3435 GN=CEL2 PE=2 SV=1
Potra2n13c25262	1.02103	Upregulated	1	0.1	0.039	0.000914049	AT3G58100	plasmodesmata callose-binding protein 5	sp|Q9FZD0|CBX8D_ARATH Carbohydrate-binding X8 domain-containing protein OS=Arabidopsis thaliana OX=3702 GN=At1g26450 PE=2 SV=1
Potra2n10c20597	1.02333	Upregulated	1	0.172	0.058	1.14083e-11	AT2G39518	Uncharacterized protein family (UPF0497)	sp|Q5W6M3|CSPLG_ORYSJ CASP-like protein 4B4 OS=Oryza sativa subsp. japonica OX=39947 GN=Os05g0344400 PE=3 SV=1
Potra2n8c17739	1.02458	Upregulated	1	0.184	0.063	1.90206e-12	AT1G68490	translocase subunit seca
Potra2n12c24799	1.02488	Upregulated	1	0.17	0.065	3.26589e-09	AT5G51770	Protein kinase superfamily protein	sp|Q9SCU5|WNK5_ARATH Probable serine/threonine-protein kinase WNK5 OS=Arabidopsis thaliana OX=3702 GN=WNK5 PE=1 SV=2
Potra2n5c11849	1.02825	Upregulated	1	0.249	0.099	2.92849e-14	AT2G17760	Eukaryotic aspartyl protease family protein	sp|Q8RVH5|7SBG2_SOYBN Basic 7S globulin 2 OS=Glycine max OX=3847 PE=1 SV=1
Potra2n17c31134	1.03488	Upregulated	1	0.385	0.153	1.23785e-24	AT5G15470	galacturonosyltransferase 14|GAUT14	sp|Q6DJM3|GL8D1_XENLA Glycosyltransferase 8 domain-containing protein 1 OS=Xenopus laevis OX=8355 GN=glt8d1 PE=2 SV=1
Potra2n9c20050	1.03496	Upregulated	1	0.12	0.043	1.70958e-06	AT5G60800	Heavy metal transport/detoxification superfamily protein	sp|Q0WV37|HIP34_ARATH Heavy metal-associated isoprenylated plant protein 34 OS=Arabidopsis thaliana OX=3702 GN=HIPP34 PE=2 SV=1
Potra2n2c4159	1.03712	Upregulated	1	0.707	0.356	2.06301e-42	AT3G07390	auxin-induced in root cultures-like protein|AIR12	sp|Q8VYH6|B651B_ARATH Cytochrome b561 and DOMON domain-containing protein At4g17280 OS=Arabidopsis thaliana OX=3702 GN=At4g17280 PE=2 SV=1
Potra2n8c18105	1.03819	Upregulated	1	0.237	0.097	1.68664e-12	AT4G14580	CBL-interacting protein kinase 4|CIPK4,SnRK3.3	sp|C0LGU5|Y5457_ARATH Probable LRR receptor-like serine/threonine-protein kinase At5g45780 OS=Arabidopsis thaliana OX=3702 GN=At5g45780 PE=1 SV=1
Potra2n2c5374	1.03916	Upregulated	1	0.122	0.04	1.14253e-07	AT1G58440	FAD/NAD(P)-binding oxidoreductase family protein|SQE1,XF1	sp|Q3S8R0|OXYE_STRRM 6-methylpretetramide 4-monooxygenase OS=Streptomyces rimosus OX=1927 GN=oxyE PE=1 SV=1
Potra2n17c31171	1.03917	Upregulated	1	0.376	0.143	1.86308e-25	AT3G01120	Pyridoxal phosphate (PLP)-dependent transferases superfamily protein|ATCYS1,CGS,CGS1,MTO1	sp|G8XHD7|BESB_STREN L-2-amino-4-chloropent-4-enoate dechlorinase/desaturase OS=Streptomyces cattleya (strain ATCC 35852 / DSM 46488 / JCM 4925 / NBRC 14057 / NRRL 8057) OX=1003195 GN=besB PE=1 SV=2
Potra2n9c19862	1.04159	Upregulated	1	0.23	0.089	1.17183e-13	AT1G07630	pol-like 5|PLL5	sp|Q8RXZ4|P2C18_ARATH Probable protein phosphatase 2C 18 OS=Arabidopsis thaliana OX=3702 GN=At1g79630 PE=2 SV=1
Potra2n12c24304	1.04245	Upregulated	1	0.152	0.056	1.98232e-08	AT3G47780	ABC2 homolog 6|ATATH6,ATH6	sp|P45861|YWJA_BACSU Uncharacterized ABC transporter ATP-binding protein YwjA OS=Bacillus subtilis (strain 168) OX=224308 GN=ywjA PE=3 SV=1
Potra2n13c25215	1.04991	Upregulated	1	0.967	0.664	1.44549e-78	AT3G54420	homolog of carrot EP3-3 chitinase|ATCHITIV,ATEP3,CHIV,EP3	sp|Q9MA41|CTL1_ARATH Chitinase-like protein 1 OS=Arabidopsis thaliana OX=3702 GN=CTL1 PE=1 SV=1
Potra2n6c14936	1.05106	Upregulated	1	0.196	0.069	5.08286e-13	AT3G57520	seed imbibition 2|AtSIP2,SIP2	sp|Q97U94|AGAL_SACS2 Alpha-galactosidase OS=Saccharolobus solfataricus (strain ATCC 35092 / DSM 1617 / JCM 11322 / P2) OX=273057 GN=galS PE=1 SV=2
Potra2n7c15819	1.05211	Upregulated	1	0.166	0.063	3.24863e-09	AT5G63840	Glycosyl hydrolases family 31 protein	sp|P19965|SP15_TETCF SITS-binding protein OS=Tetronarce californica OX=7787 PE=1 SV=2
Potra2n19c33923	1.0548	Upregulated	1	0.172	0.066	2.57652e-09	AT1G05840	Eukaryotic aspartyl protease family protein	sp|P07267|CARP_YEAST Saccharopepsin OS=Saccharomyces cerevisiae (strain ATCC 204508 / S288c) OX=559292 GN=PEP4 PE=1 SV=1
Potra2n5c10737	1.0587	Upregulated	1	0.585	0.239	2.28264e-40	AT4G24160	alpha/beta-Hydrolases superfamily protein	sp|P9WNH5|HSAD_MYCTU 4,5:9,10-diseco-3-hydroxy-5,9,17-trioxoandrosta-1(10),2-diene-4-oate hydrolase OS=Mycobacterium tuberculosis (strain ATCC 25618 / H37Rv) OX=83332 GN=hsaD PE=1 SV=1
Potra2n5c11188	1.05945	Upregulated	1	0.129	0.051	1.01297e-05	AT4G19950	polyadenylate-binding protein 1-B-binding protein
Potra2n1c3288	1.05966	Upregulated	1	0.487	0.201	5.23437e-32	AT1G53210	sodium/calcium exchanger family protein / calcium-binding EF hand family protein	sp|Q6K3R5|NCL2_ORYSJ Sodium/calcium exchanger NCL2 OS=Oryza sativa subsp. japonica OX=39947 GN=NCL2 PE=2 SV=2
Potra2n18c32973	1.07065	Upregulated	1	0.268	0.106	2.70061e-16	AT2G26640	3-ketoacyl-CoA synthase 11|KCS11	sp|P48391|2PS_GERHY 2-pyrone synthase OS=Gerbera hybrida OX=18101 GN=2PS PE=1 SV=2
Potra2n15c28853	1.07442	Upregulated	1	0.17	0.062	3.38669e-10	AT1G73640	RAB GTPase homolog A6A|AtRABA6a,RABA6a	sp|Q5E9J3|RSLBB_BOVIN Ras-like protein family member 11B OS=Bos taurus OX=9913 GN=RASL11B PE=2 SV=1
Potra2n7c16279	1.07543	Upregulated	1	0.105	0.039	0.000103917	AT4G37030	membrane protein	sp|Q8GUM4|Y3739_ARATH Uncharacterized membrane protein At3g27390 OS=Arabidopsis thaliana OX=3702 GN=At3g27390 PE=1 SV=2
Potra2n2c5470	1.0757	Upregulated	1	0.127	0.051	2.07281e-05	AT4G24580	Rho GTPase activation protein (RhoGAP) with PH domain-containing protein	sp|Q9FMP8|RGAP6_ARATH Rho GTPase-activating protein 6 OS=Arabidopsis thaliana OX=3702 GN=ROPGAP6 PE=2 SV=1
Potra2n4c9650	1.07617	Upregulated	1	0.949	0.624	1.67957e-82	AT4G15093	catalytic LigB subunit of aromatic ring-opening dioxygenase family	sp|O74741|DIOXL_SCHPO 4,5-DOPA dioxygenase extradiol-like protein OS=Schizosaccharomyces pombe (strain 972 / ATCC 24843) OX=284812 GN=SPBC1709.16c PE=3 SV=2
Potra2n6c13590	1.07742	Upregulated	1	0.299	0.11	3.42934e-20	AT4G37980	cinnamyl alcohol dehydrogenase 7|ATCAD7,CAD7,ELI3,ELI3-1	sp|A7RK30|QORL2_NEMVE Quinone oxidoreductase-like protein 2 homolog OS=Nematostella vectensis OX=45351 GN=v1g238856 PE=3 SV=1
Potra2n16c29897	1.07994	Upregulated	1	0.39	0.157	3.33176e-24	AT5G06320	NDR1/HIN1-like 3|NHL3	sp|Q9ZVD2|NHL13_ARATH NDR1/HIN1-like protein 13 OS=Arabidopsis thaliana OX=3702 GN=NHL13 PE=2 SV=1
Potra2n2c4561	1.08195	Upregulated	1	0.101	0.034	1.00001e-05	AT4G02400	U3 ribonucleoprotein (Utp) family protein	sp|Q9BVJ6|UT14A_HUMAN U3 small nucleolar RNA-associated protein 14 homolog A OS=Homo sapiens OX=9606 GN=UTP14A PE=1 SV=1
Potra2n8c17356	1.08396	Upregulated	1	0.733	0.378	5.75161e-48	AT1G54320	LEM3 (ligand-effect modulator 3) family protein / CDC50 family protein	sp|A0ZT23|CC50C_PANTR Cell cycle control protein 50C OS=Pan troglodytes OX=9598 GN=TMEM30C PE=2 SV=2
Potra2n17c31004	1.09665	Upregulated	1	0.326	0.115	4.09301e-25	AT3G30390	Transmembrane amino acid transporter family protein	sp|Q8CH36|S36A4_MOUSE Proton-coupled amino acid transporter 4 OS=Mus musculus OX=10090 GN=Slc36a4 PE=2 SV=1
Potra2n1c3196	1.10052	Upregulated	1	0.586	0.246	2.75265e-41	AT3G13110	serine acetyltransferase 2;2|ATSERAT2;2,SAT-1,SAT-A,SAT-M,SAT3,SERAT2;2	sp|P28266|NODL_RHIME Nodulation protein L OS=Rhizobium meliloti (strain 1021) OX=266834 GN=nodL PE=3 SV=1
Potra2n6c13336	1.10146	Upregulated	1	0.663	0.283	8.85451e-46	AT5G12010	nuclease	sp|Q5U538|HARB1_XENLA Putative nuclease HARBI1 OS=Xenopus laevis OX=8355 GN=harbi1 PE=2 SV=1
Potra2n1c70	1.10913	Upregulated	1	0.235	0.08	1.69665e-17	AT2G20142	Toll-Interleukin-Resistance (TIR) domain family protein
Potra2n9c18979	1.11261	Upregulated	1	0.272	0.103	4.53875e-17	AT4G38710	glycine-rich protein	sp|Q9SAD7|IF4B2_ARATH Eukaryotic translation initiation factor 4B2 OS=Arabidopsis thaliana OX=3702 GN=EIF4B2 PE=1 SV=1
Potra2n689s36477	1.11641	Upregulated	1	0.707	0.343	1.8055e-49
Potra2n1c1993	1.11697	Upregulated	1	0.17	0.065	3.12309e-09	AT2G44350	Citrate synthase family protein	sp|Q8NSH7|PRPC1_CORGL 2-methylcitrate synthase 1 OS=Corynebacterium glutamicum (strain ATCC 13032 / DSM 20300 / JCM 1318 / LMG 3730 / NCIMB 10025) OX=196627 GN=prpC1 PE=1 SV=1
Potra2n4c9298	1.11801	Upregulated	1	0.158	0.056	9.41093e-10	AT2G47485	hypothetical protein
Potra2n11c22512	1.11859	Upregulated	1	0.397	0.146	3.94802e-30	AT1G64720	Polyketide cyclase/dehydrase and lipid transport superfamily protein|CP5	sp|P53808|PPCT_MOUSE Phosphatidylcholine transfer protein OS=Mus musculus OX=10090 GN=Pctp PE=1 SV=2
Potra2n1c1049	1.11953	Upregulated	1	0.916	0.519	1.25994e-73	AT1G62510	Bifunctional inhibitor/lipid-transfer protein/seed storage 2S albumin superfamily protein	sp|P24337|HPSE_SOYBN Hydrophobic seed protein OS=Glycine max OX=3847 PE=1 SV=1
Potra2n5c11276	1.1265	Upregulated	1	0.133	0.046	4.36351e-08	AT1G77590	long chain acyl-CoA synthetase 9	sp|O43103|SID2_USTMA Ferrichrome siderophore peptide synthetase OS=Ustilago maydis (strain 521 / FGSC 9021) OX=237631 GN=SID2 PE=3 SV=2
Potra2n6c15263	1.12798	Upregulated	1	0.826	0.445	1.17559e-60	AT5G47550	Cystatin/monellin superfamily protein	sp|Q8LC76|CYT7_ARATH Cysteine proteinase inhibitor 7 OS=Arabidopsis thaliana OX=3702 GN=CYS7 PE=2 SV=2
Potra2n6c14878	1.12854	Upregulated	1	0.166	0.059	2.58268e-10	AT5G06860	polygalacturonase inhibiting protein 1|ATPGIP1,PGIP1	sp|Q9XIB6|PLRX2_ARATH Pollen-specific leucine-rich repeat extensin-like protein 2 OS=Arabidopsis thaliana OX=3702 GN=PEX2 PE=1 SV=1
Potra2n15c28973	1.13436	Upregulated	1	0.187	0.068	4.15427e-12	AT4G28000	P-loop containing nucleoside triphosphate hydrolases superfamily protein	sp|P09975|YCF2_MARPO Protein Ycf2 OS=Marchantia polymorpha OX=3197 GN=ycf2 PE=3 SV=1
Potra2n1c2894	1.13957	Upregulated	1	0.238	0.091	9.68908e-15	AT3G27160	Ribosomal protein S21 family protein|GHS1	sp|P82024|RR21_SPIOL 30S ribosomal protein S21, chloroplastic OS=Spinacia oleracea OX=3562 GN=rps21 PE=1 SV=2
Potra2n4c9969	1.14026	Upregulated	1	0.185	0.059	4.08162e-14	AT4G38650	Glycosyl hydrolase family 10 protein	sp|Q01176|XYN2_MAGGR Endo-1,4-beta-xylanase 2 OS=Magnaporthe grisea OX=148305 GN=XYL2 PE=1 SV=1
Potra2n6c14573	1.14244	Upregulated	1	0.133	0.043	4.43013e-09	AT3G09320	DHHC-type zinc finger family protein	sp|A2VEY9|APP_DROME Palmitoyltransferase app OS=Drosophila melanogaster OX=7227 GN=app PE=1 SV=1
Potra2n12c23995	1.14291	Upregulated	1	0.205	0.063	4.87018e-17	AT5G24090	chitinase A|ATCHIA,CHIA	sp|P23473|CHLY_PARTH Bifunctional chitinase/lysozyme (Fragment) OS=Parthenocissus quinquefolia OX=3607 PE=1 SV=1
Potra2n8c17375	1.14453	Upregulated	1	0.29	0.094	3.00634e-24	AT3G19830	Calcium-dependent lipid-binding (CaLB domain) family protein
Potra2n12c24306	1.15048	Upregulated	1	0.213	0.071	4.95484e-16	AT3G47730	ATP-binding cassette A2|ABCA2,ATATH1,ATH1	sp|Q2NTI7|ZNUC_SODGM Zinc import ATP-binding protein ZnuC OS=Sodalis glossinidius (strain morsitans) OX=343509 GN=znuC PE=3 SV=1
Potra2n4c8780	1.16134	Upregulated	1	0.223	0.07	3.7635e-18	AT3G58610	ketol-acid reductoisomerase	sp|Q47UP4|ILVC_COLP3 Ketol-acid reductoisomerase (NADP(+)) OS=Colwellia psychrerythraea (strain 34H / ATCC BAA-681) OX=167879 GN=ilvC PE=3 SV=1
Potra2n3c7256	1.16198	Upregulated	1	0.126	0.042	7.18928e-08	AT1G64320	myosin heavy chain-like protein	sp|F4JIF4|NET1B_ARATH Protein NETWORKED 1B OS=Arabidopsis thaliana OX=3702 GN=NET1B PE=2 SV=1
Potra2n11c22682	1.16604	Upregulated	1	0.571	0.252	1.4687e-37	AT5G54650	formin homology5|ATFH5,Fh5	sp|Q9VUC6|FRL_DROME Formin-like protein OS=Drosophila melanogaster OX=7227 GN=Frl PE=1 SV=3
Potra2n13c26094	1.17629	Upregulated	1	0.302	0.094	3.62511e-26	AT3G05290	peroxisomal adenine nucleotide carrier 1|PNC1	sp|Q12251|YP011_YEAST Uncharacterized mitochondrial carrier YPR011C OS=Saccharomyces cerevisiae (strain ATCC 204508 / S288c) OX=559292 GN=YPR011C PE=1 SV=1
Potra2n1c1515	1.17654	Upregulated	1	0.225	0.074	3.83816e-17	AT5G20100	plant/protein	sp|Q9SSC1|Y1801_ARATH MAPK kinase substrate protein At1g80180 OS=Arabidopsis thaliana OX=3702 GN=At1g80180 PE=1 SV=1
Potra2n3c6715	1.17876	Upregulated	1	0.212	0.068	1.3185e-16	AT3G54390	sequence-specific DNA binding transcription factor	sp|Q9SYG2|ASIL1_ARATH Trihelix transcription factor ASIL1 OS=Arabidopsis thaliana OX=3702 GN=ASIL1 PE=1 SV=1
Potra2n2c4143	1.1806	Upregulated	1	0.357	0.138	3.58489e-24	AT5G48480	Lactoylglutathione lyase / glyoxalase I family protein	sp|Q9LV66|Y5848_ARATH Uncharacterized protein At5g48480 OS=Arabidopsis thaliana OX=3702 GN=At5g48480 PE=1 SV=1
Potra2n8c17104	1.18179	Upregulated	1	0.997	0.806	5.0923e-143	AT5G02500	heat shock cognate protein 70-1|AT-HSC70-1,HSC70,HSC70-1,HSP70-1	sp|P86237|HS71L_MESAU Heat shock 70 kDa protein 1-like (Fragments) OS=Mesocricetus auratus OX=10036 GN=HSPA1L PE=1 SV=1
Potra2n1c1145	1.18588	Upregulated	1	0.194	0.08	8.60191e-10	AT1G32127	plant viral-response family protein	sp|Q60774|TM45A_MOUSE Transmembrane protein 45A OS=Mus musculus OX=10090 GN=Tmem45a PE=2 SV=1
Potra2n5c10711	1.20871	Upregulated	1	0.192	0.058	6.47433e-16	AT5G06300	Putative lysine decarboxylase family protein	sp|B2HS63|LOGH_MYCMM Cytokinin riboside 5'-monophosphate phosphoribohydrolase OS=Mycobacterium marinum (strain ATCC BAA-535 / M) OX=216594 GN=MMAR_4233 PE=1 SV=1
Potra2n19c34260	1.21514	Upregulated	1	0.118	0.041	1.23902e-06
Potra2n14c27100	1.21711	Upregulated	1	0.808	0.394	1.06035e-64	AT4G01070	UDP-Glycosyltransferase superfamily protein|GT72B1,UGT72B1	sp|Q40286|UFOG4_MANES Anthocyanidin 3-O-glucosyltransferase 4 (Fragment) OS=Manihot esculenta OX=3983 GN=GT4 PE=2 SV=1
Potra2n13c25570	1.23229	Upregulated	1	0.232	0.083	3.89767e-16
Potra2n2c5261	1.23723	Upregulated	1	0.3	0.103	4.07726e-23	AT4G25000	alpha-amylase-like protein|AMY1,ATAMY1	sp|Q02751|MALT_CANAX Alpha-glucosidase OS=Candida albicans OX=5476 GN=MAL2 PE=1 SV=4
Potra2n8c18231	1.23769	Upregulated	1	0.462	0.166	9.63197e-38	AT3G23920	beta-amylase 1|BAM1,BMY7,TR-BAMY	sp|P30271|AMYB_SECCE Beta-amylase (Fragment) OS=Secale cereale OX=4550 GN=BMY1 PE=2 SV=1
Potra2n11c23660	1.24019	Upregulated	1	0.302	0.105	5.0557e-23	AT4G04720	calcium-dependent protein kinase 21|CPK21	sp|P34368|YLJ5_CAEEL Uncharacterized calcium-binding protein C50C3.5 OS=Caenorhabditis elegans OX=6239 GN=C50C3.5 PE=4 SV=3
Potra2n14c26477	1.24061	Upregulated	1	0.177	0.067	2.85261e-10	AT4G37360	cytochrome P450, family 81, subfamily D, polypeptide 2|CYP81D2	sp|A1CLZ3|CCSG_ASPCL Cytochrome P450 monooxygenase ccsG OS=Aspergillus clavatus (strain ATCC 1007 / CBS 513.65 / DSM 816 / NCTC 3887 / NRRL 1) OX=344612 GN=ccsG PE=3 SV=1
Potra2n2c5523	1.24365	Upregulated	1	0.535	0.216	4.66492e-41	AT1G78240	S-adenosyl-L-methionine-dependent methyltransferases superfamily protein|OSU1,QUA2,TSD2	sp|Q9LN50|PMTS_ARATH Probable methyltransferase PMT28 OS=Arabidopsis thaliana OX=3702 GN=At1g19430 PE=2 SV=1
Potra2n10c21016	1.24721	Upregulated	1	0.357	0.132	1.63604e-26	AT1G13900	Purple acid phosphatases superfamily protein	sp|Q9LX83|PPA19_ARATH Purple acid phosphatase 19 OS=Arabidopsis thaliana OX=3702 GN=PAP19 PE=2 SV=1
Potra2n5c10624	1.25838	Upregulated	1	0.203	0.061	1.47298e-17	AT5G11880	Pyridoxal-dependent decarboxylase family protein	sp|Q92445|DCOR_PARBR Ornithine decarboxylase (Fragment) OS=Paracoccidioides brasiliensis OX=121759 GN=ODC PE=3 SV=1
Potra2n13c24951	1.25939	Upregulated	1	0.295	0.108	4.06143e-21	AT5G58300	Leucine-rich repeat protein kinase family protein	sp|P9WI83|PKNA_MYCTU Serine/threonine-protein kinase PknA OS=Mycobacterium tuberculosis (strain ATCC 25618 / H37Rv) OX=83332 GN=pknA PE=1 SV=1
Potra2n1c496	1.26609	Upregulated	1	0.116	0.035	2.05804e-08	AT1G69040	ACT domain repeat 4|ACR4	sp|B4RC79|GLND_PHEZH Bifunctional uridylyltransferase/uridylyl-removing enzyme OS=Phenylobacterium zucineum (strain HLK1) OX=450851 GN=glnD PE=3 SV=1
Potra2n3c7764	1.26683	Upregulated	1	0.344	0.121	7.60466e-27	AT5G47070	Protein kinase superfamily protein	sp|Q54VU4|Y8013_DICDI Probable serine/threonine-protein kinase DDB_G0280133 OS=Dictyostelium discoideum OX=44689 GN=DDB_G0280133 PE=3 SV=1
Potra2n2c4494	1.278	Upregulated	1	0.989	0.664	5.1166e-115	AT5G35735	Auxin-responsive family protein	sp|A2VE04|FRRS1_BOVIN Ferric-chelate reductase 1 OS=Bos taurus OX=9913 GN=FRRS1 PE=2 SV=1
Potra2n16c30409	1.2868	Upregulated	1	0.231	0.077	1.49592e-17	AT5G01650	Tautomerase/MIF superfamily protein	sp|Q76BK2|MIF_XENLA Macrophage migration inhibitory factor OS=Xenopus laevis OX=8355 GN=mif PE=1 SV=1
Potra2n2c5676	1.30493	Upregulated	1	0.52	0.205	3.80601e-42	AT1G77490	thylakoidal ascorbate peroxidase	sp|Q9PBB2|KATG_XYLFA Catalase-peroxidase OS=Xylella fastidiosa (strain 9a5c) OX=160492 GN=katG PE=3 SV=1
Potra2n10c20765	1.30591	Upregulated	1	0.827	0.386	6.28587e-78	AT5G05580	fatty acid desaturase 8|FAD8	sp|O34653|DES_BACSU Fatty acid desaturase OS=Bacillus subtilis (strain 168) OX=224308 GN=des PE=2 SV=1
Potra2n4c9976	1.30844	Upregulated	1	0.957	0.584	5.14309e-104	AT2G17840	Senescence/dehydration-associated protein-like protein|ERD7	sp|Q9SD22|SDEH3_ARATH Senescence/dehydration-associated protein At3g51250 OS=Arabidopsis thaliana OX=3702 GN=At3g51250 PE=2 SV=1
Potra2n13c25024	1.31138	Upregulated	1	0.96	0.6	1.45004e-111	AT4G27280	Calcium-binding EF-hand family protein	sp|Q8S1Y9|CML1_ORYSJ Calmodulin-like protein 1 OS=Oryza sativa subsp. japonica OX=39947 GN=CML1 PE=2 SV=1
Potra2n8c17924	1.31172	Upregulated	1	0.264	0.087	3.18878e-21	AT2G37870	Bifunctional inhibitor/lipid-transfer protein/seed storage 2S albumin superfamily protein
Potra2n5c11107	1.31643	Upregulated	1	0.845	0.378	1.29691e-81	AT1G71695	Peroxidase superfamily protein	sp|Q6ZJJ1|APX4_ORYSJ Probable L-ascorbate peroxidase 4, peroxisomal OS=Oryza sativa subsp. japonica OX=39947 GN=APX4 PE=2 SV=1
Potra2n10c22051	1.32357	Upregulated	1	0.152	0.043	2.36971e-13	AT1G70530	cysteine-rich RLK (RECEPTOR-like protein kinase) 3	sp|Q6R2K2|SRF4_ARATH Protein STRUBBELIG-RECEPTOR FAMILY 4 OS=Arabidopsis thaliana OX=3702 GN=SRF4 PE=2 SV=1
Potra2n10c21253	1.32469	Upregulated	1	0.12	0.033	2.92652e-10	AT1G68690	Protein kinase superfamily protein	sp|Q6FKC6|SSN3_CANGA Serine/threonine-protein kinase SSN3 OS=Candida glabrata (strain ATCC 2001 / CBS 138 / JCM 3761 / NBRC 0622 / NRRL Y-65) OX=284593 GN=SSN3 PE=3 SV=1
Potra2n6c14907	1.32955	Upregulated	1	0.154	0.057	7.89499e-09	AT4G15550	indole-3-acetate beta-D-glucosyltransferase|IAGLU	sp|Q9LSY5|U71B7_ARATH UDP-glycosyltransferase 71B7 OS=Arabidopsis thaliana OX=3702 GN=UGT71B7 PE=2 SV=2
Potra2n10c21739	1.33259	Upregulated	1	0.22	0.061	1.89234e-21	AT3G22910	ATPase E1-E2 type family protein / haloacid dehalogenase-like hydrolase family protein	sp|P32660|ATC5_YEAST Phospholipid-transporting ATPase DNF1 OS=Saccharomyces cerevisiae (strain ATCC 204508 / S288c) OX=559292 GN=DNF1 PE=1 SV=2
Potra2n18c32145	1.3408	Upregulated	1	0.487	0.177	2.22809e-42	AT2G31050	Cupredoxin superfamily protein	sp|Q9T076|ENL2_ARATH Early nodulin-like protein 2 OS=Arabidopsis thaliana OX=3702 GN=At4g27520 PE=1 SV=1
Potra2n611s36149	1.37209	Upregulated	1	0.213	0.067	5.99881e-18	AT4G34200	D-3-phosphoglycerate dehydrogenase|EDA9	sp|A4W948|GHRA_ENT38 Glyoxylate/hydroxypyruvate reductase A OS=Enterobacter sp. (strain 638) OX=399742 GN=ghrA PE=3 SV=1
Potra2n8c17115	1.37327	Upregulated	1	0.956	0.601	9.18899e-116	AT3G55430	O-Glycosyl hydrolases family 17 protein	sp|Q93V72|PDCB4_ARATH PLASMODESMATA CALLOSE-BINDING PROTEIN 4 OS=Arabidopsis thaliana OX=3702 GN=PDCB4 PE=1 SV=1
Potra2n9c19303	1.37349	Upregulated	1	0.178	0.053	1.74611e-15	AT2G14960	Auxin-responsive GH3 family protein|GH3.1	sp|Q8N2G8|GHDC_HUMAN GH3 domain-containing protein OS=Homo sapiens OX=9606 GN=GHDC PE=1 SV=2
Potra2n4c8518	1.37755	Upregulated	1	0.893	0.463	9.70893e-91	AT4G04610	APS reductase 1|APR,APR1,ATAPR1,PRH19	sp|Q00216|TIGA_ASPNG Protein disulfide-isomerase tigA OS=Aspergillus niger OX=5061 GN=tigA PE=2 SV=1
Potra2n4c9589	1.38275	Upregulated	1	0.177	0.049	2.42544e-16	AT4G39730	Lipase/lipooxygenase, PLAT/LH2 family protein	sp|Q2V2V3|PLAT3_ARATH PLAT domain-containing protein 3 OS=Arabidopsis thaliana OX=3702 GN=PLAT3 PE=4 SV=1
Potra2n1c3481	1.39243	Upregulated	1	0.109	0.027	3.86205e-10	AT5G53870	early nodulin-like protein 1	sp|P93329|NO20_MEDTR Early nodulin-20 OS=Medicago truncatula OX=3880 GN=ENOD20 PE=3 SV=1
Potra2n6c14997	1.39821	Upregulated	1	0.184	0.057	3.65183e-15	AT5G04170	Calcium-binding EF-hand family protein	sp|O14815|CAN9_HUMAN Calpain-9 OS=Homo sapiens OX=9606 GN=CAPN9 PE=1 SV=1
Potra2n7c15751	1.39837	Upregulated	1	0.321	0.101	2.4318e-29	AT5G09760	Plant invertase/pectin methylesterase inhibitor superfamily	sp|O81415|PME39_ARATH Probable pectinesterase/pectinesterase inhibitor 39 OS=Arabidopsis thaliana OX=3702 GN=PME39 PE=2 SV=1
Potra2n11c22450	1.40261	Upregulated	1	0.315	0.101	2.57672e-28	AT2G34790	FAD-binding Berberine family protein|EDA28,MEE23	sp|P30986|RETO_ESCCA Reticuline oxidase OS=Eschscholzia californica OX=3467 GN=BBE1 PE=1 SV=1
Potra2n10c22000	1.42151	Upregulated	1	0.23	0.065	2.58165e-22	AT5G14420	RING domain ligase2|RGLG2	sp|Q1ZXB3|CPNF_DICDI Copine-F OS=Dictyostelium discoideum OX=44689 GN=cpnF PE=2 SV=1
Potra2n15c28938	1.42231	Upregulated	1	0.333	0.103	2.28171e-31	AT5G37490	ARM repeat superfamily protein	sp|Q5UQ40|UBC4_MIMIV Probable bifunctional E2/E3 enzyme R795 OS=Acanthamoeba polyphaga mimivirus OX=212035 GN=MIMI_R795 PE=3 SV=1
Potra2n14c26841	1.4305	Upregulated	1	0.462	0.163	1.13896e-41	AT3G60750	Transketolase	sp|B1I3J6|DXS_DESAP 1-deoxy-D-xylulose-5-phosphate synthase OS=Desulforudis audaxviator (strain MP104C) OX=477974 GN=dxs PE=3 SV=1
Potra2n1c3106	1.4421	Upregulated	1	0.165	0.042	1.02563e-16
Potra2n2c5105	1.44459	Upregulated	1	0.111	0.03	1.30177e-09	AT3G60690	SAUR-like auxin-responsive protein family	sp|B7F8P5|SAU39_ORYSJ Auxin-responsive protein SAUR36 OS=Oryza sativa subsp. japonica OX=39947 GN=SAUR39 PE=2 SV=1
Potra2n18c32483	1.44485	Upregulated	1	0.119	0.03	1.94697e-11	AT2G18960	H[+]-ATPase 1	sp|Q9LT02|PDR2_ARATH Probable manganese-transporting ATPase PDR2 OS=Arabidopsis thaliana OX=3702 GN=PDR2 PE=1 SV=1
Potra2n1c3184	1.4459	Upregulated	1	0.344	0.107	3.37684e-33	AT5G55480	SHV3-like 1|SVL1	sp|Q9SD81|GDPD6_ARATH Glycerophosphodiester phosphodiesterase GDPD6 OS=Arabidopsis thaliana OX=3702 GN=GDPD6 PE=2 SV=1
Potra2n1c1053	1.46083	Upregulated	1	0.434	0.137	1.80653e-43	AT4G17260	Lactate/malate dehydrogenase family protein	sp|Q43744|MDHM_BRANA Malate dehydrogenase, mitochondrial OS=Brassica napus OX=3708 GN=MDH PE=2 SV=1
Potra2n2c5467	1.46397	Upregulated	1	0.412	0.132	1.95059e-40	AT1G09750	Eukaryotic aspartyl protease family protein	sp|A2ZC67|ASP1_ORYSI Aspartic proteinase Asp1 OS=Oryza sativa subsp. indica OX=39946 GN=ASP1 PE=2 SV=2
Potra2n18c32312	1.46479	Upregulated	1	0.855	0.414	1.62063e-93	AT1G13950	eukaryotic elongation factor 5A-1|ATELF5A-1,EIF-5A,EIF5A,ELF5A-1	sp|Q8PYE0|IF5A_METMA Translation initiation factor 5A OS=Methanosarcina mazei (strain ATCC BAA-159 / DSM 3647 / Goe1 / Go1 / JCM 11833 / OCM 88) OX=192952 GN=eif5a PE=3 SV=1
Potra2n10c20448	1.46704	Upregulated	1	0.107	0.03	2.16009e-08	AT1G50490	ubiquitin-conjugating enzyme 20|UBC20	sp|Q55EY8|UBE2W_DICDI Probable ubiquitin-conjugating enzyme E2 W OS=Dictyostelium discoideum OX=44689 GN=ube2w PE=3 SV=1
Potra2n17c31424	1.47337	Upregulated	1	0.101	0.024	7.15174e-10	AT4G14010	ralf-like 32|RALFL32	sp|O23262|RLF32_ARATH Protein RALF-like 32 OS=Arabidopsis thaliana OX=3702 GN=RALFL32 PE=3 SV=1
Potra2n1c3303	1.48856	Upregulated	1	0.679	0.229	5.5078e-74	AT1G78440	gibberellin 2-beta-dioxygenase|ATGA2OX1,GA2OX1	sp|P10621|IPNS_STRCL Isopenicillin N synthase OS=Streptomyces clavuligerus OX=1901 GN=pcbC PE=3 SV=1
Potra2n2c6336	1.49819	Upregulated	1	0.661	0.223	1.74144e-71
Potra2n15c28122	1.50107	Upregulated	1	0.553	0.182	1.46549e-57	AT5G62350	Plant invertase/pectin methylesterase inhibitor superfamily protein	sp|Q8GX86|PME21_ARATH Probable pectinesterase/pectinesterase inhibitor 21 OS=Arabidopsis thaliana OX=3702 GN=PME21 PE=2 SV=2
Potra2n4c8757	1.50154	Upregulated	1	0.405	0.116	1.94165e-43	AT4G27460	Cystathionine beta-synthase (CBS) family protein	sp|Q8GXI9|PV42B_ARATH SNF1-related protein kinase regulatory subunit gamma-like PV42b OS=Arabidopsis thaliana OX=3702 GN=PV42B PE=2 SV=1
Potra2n5c10874	1.50378	Upregulated	1	0.871	0.392	6.91588e-102	AT5G63450	cytochrome P450, family 94, subfamily B, polypeptide 1|CYP94B1	sp|D5JBX0|GAO_HELAN Germacrene A hydroxylase OS=Helianthus annuus OX=4232 GN=GAO PE=1 SV=1
Potra2n10c21700	1.51593	Upregulated	1	0.191	0.049	6.15342e-20	AT2G32030	Acyl-CoA N-acyltransferases (NAT) superfamily protein	sp|P40586|YIW2_YEAST Uncharacterized protein YIR042C OS=Saccharomyces cerevisiae (strain ATCC 204508 / S288c) OX=559292 GN=YIR042C PE=4 SV=1
Potra2n18c32440	1.53036	Upregulated	1	0.123	0.032	2.47979e-11	AT4G25810	xyloglucan endotransglycosylase 6|XTH23,XTR6	sp|P33693|EXOK_RHIME Endo-1,3-1,4-beta-glycanase ExoK OS=Rhizobium meliloti (strain 1021) OX=266834 GN=exoK PE=1 SV=1
Potra2n1c322	1.53104	Upregulated	1	0.119	0.032	2.0989e-10	AT1G16170	ephrin-A3 protein
Potra2n15c27977	1.53764	Upregulated	1	0.127	0.034	9.22884e-12	AT2G46930	Pectinacetylesterase family protein	sp|B9DFR3|PAE9_ARATH Pectin acetylesterase 9 OS=Arabidopsis thaliana OX=3702 GN=PAE9 PE=2 SV=1
Potra2n4c9338	1.53841	Upregulated	1	0.111	0.027	1.28714e-10	AT1G67070	Mannose-6-phosphate isomerase, type I|DIN9,PMI2	sp|P25081|MANA_SALTY Mannose-6-phosphate isomerase OS=Salmonella typhimurium (strain LT2 / SGSC1412 / ATCC 700720) OX=99287 GN=manA PE=1 SV=2
Potra2n1c2884	1.54079	Upregulated	1	0.16	0.043	1.26654e-15	AT3G03470	cytochrome P450, family 87, subfamily A, polypeptide 9|CYP89A9	sp|Q2MJ20|C7A12_MEDTR Beta-amyrin 28-monooxygenase OS=Medicago truncatula OX=3880 GN=CYP716A12 PE=1 SV=1
Potra2n3c7061	1.56772	Upregulated	1	0.35	0.092	1.82736e-40	AT5G47910	respiratory burst oxidase homologue D|ATRBOHD,RBOHD	sp|O94727|FRP2_SCHPO Ferric/cupric reductase transmembrane component 2 OS=Schizosaccharomyces pombe (strain 972 / ATCC 24843) OX=284812 GN=frp2 PE=3 SV=1
Potra2n15c28621	1.57875	Upregulated	1	0.13	0.027	1.40416e-15	AT5G62620	Galactosyltransferase family protein	sp|Q24157|BRN_DROME Beta-1,3-galactosyltransferase brn OS=Drosophila melanogaster OX=7227 GN=brn PE=2 SV=2
Potra2n9c18819	1.57876	Upregulated	1	0.126	0.031	1.30201e-12	AT1G08250	arogenate dehydratase 6|ADT6	sp|P32452|PHA2_YEAST Putative prephenate dehydratase OS=Saccharomyces cerevisiae (strain ATCC 204508 / S288c) OX=559292 GN=PHA2 PE=1 SV=3
Potra2n8c18093	1.58208	Upregulated	1	0.436	0.132	1.69598e-47	AT3G22910	ATPase E1-E2 type family protein / haloacid dehalogenase-like hydrolase family protein	sp|Q9N0Z4|AT11B_RABIT Probable phospholipid-transporting ATPase IF (Fragment) OS=Oryctolagus cuniculus OX=9986 GN=ATP11B PE=1 SV=2
Potra2n14c27704	1.58463	Upregulated	1	0.563	0.188	6.41039e-61	AT5G14780	formate dehydrogenase	sp|P53100|YGT5_YEAST Putative 2-hydroxyacid dehydrogenase YGL185C OS=Saccharomyces cerevisiae (strain ATCC 204508 / S288c) OX=559292 GN=YGL185C PE=1 SV=1
Potra2n6c15338	1.58537	Upregulated	1	0.113	0.028	5.02604e-11	AT4G16370	oligopeptide transporter|ATOPT3,OPT3	sp|Q7LL00|YQJC_SCHPO Uncharacterized oligopeptide transporter C1840.12 OS=Schizosaccharomyces pombe (strain 972 / ATCC 24843) OX=284812 GN=SPCC1840.12 PE=3 SV=2
Potra2n2c4501	1.60172	Upregulated	1	0.185	0.047	1.04386e-19			sp|O59793|ESS2_SCHPO Stress response protein bis1 OS=Schizosaccharomyces pombe (strain 972 / ATCC 24843) OX=284812 GN=bis1 PE=1 SV=1
Potra2n10c21463	1.60321	Upregulated	1	0.154	0.041	4.70144e-15	AT2G01480	O-fucosyltransferase family protein	sp|K7R4D4|MSR_TRIFG Protein MANNAN SYNTHESIS-RELATED OS=Trigonella foenum-graecum OX=78534 GN=MSR PE=2 SV=1
Potra2n10c22118	1.60572	Upregulated	1	0.497	0.148	8.20515e-57	AT1G10370	Glutathione S-transferase family protein|ATGSTU17,ERD9,GST30,GST30B	sp|Q9VHD3|MAAI1_DROME Probable maleylacetoacetate isomerase 1 OS=Drosophila melanogaster OX=7227 GN=GstZ1 PE=1 SV=1
Potra2n10c22037	1.636	Upregulated	1	0.118	0.029	1.14162e-11	AT1G70580	alanine-2-oxoglutarate aminotransferase 2|AOAT2,GGT2	sp|Q9ZHE5|HIS8_BUCAP Histidinol-phosphate aminotransferase OS=Buchnera aphidicola subsp. Schizaphis graminum (strain Sg) OX=198804 GN=hisC PE=3 SV=1
Potra2n5c11356	1.66538	Upregulated	1	0.806	0.324	4.09096e-103	AT4G08685	Pollen Ole e 1 allergen and extensin family protein|SAH7	sp|O82015|LIGV1_LIGVU Major pollen allergen Lig v 1 OS=Ligustrum vulgare OX=13597 PE=1 SV=2
Potra2n14c26369	1.67613	Upregulated	1	0.391	0.094	1.28477e-51	AT3G49780	phytosulfokine 4 precursor|ATPSK3 (FORMER SYMBOL),ATPSK4,PSK4	sp|Q9SZG4|PSK4_ARATH Putative phytosulfokines 4 OS=Arabidopsis thaliana OX=3702 GN=PSK4 PE=3 SV=1
Potra2n13c25312	1.70922	Upregulated	1	0.134	0.033	8.01517e-14
Potra2n5c12437	1.70953	Upregulated	1	0.263	0.056	1.59967e-35	AT1G08720	Protein kinase superfamily protein	sp|Q9LFA2|KIPK1_ARATH Serine/threonine-protein kinase KIPK1 OS=Arabidopsis thaliana OX=3702 GN=KIPK1 PE=1 SV=1
Potra2n5c10921	1.72007	Upregulated	1	0.242	0.057	1.46264e-29	AT3G22930	calmodulin-like 11	sp|Q54IY3|CETNA_DICDI Centrin-A OS=Dictyostelium discoideum OX=44689 GN=cenA PE=3 SV=1
Potra2n5c10790	1.72984	Upregulated	1	0.156	0.039	1.10076e-16	AT5G66460	Glycosyl hydrolase superfamily protein	sp|Q5B833|MANB_EMENI Mannan endo-1,4-beta-mannosidase B OS=Emericella nidulans (strain FGSC A4 / ATCC 38163 / CBS 112.46 / NRRL 194 / M139) OX=227321 GN=manB PE=1 SV=2
Potra2n1c1219	1.73623	Upregulated	1	0.108	0.025	3.80525e-11	AT2G35230	VQ motif-containing protein	sp|O82170|IKU1_ARATH Protein HAIKU1 OS=Arabidopsis thaliana OX=3702 GN=IKU1 PE=1 SV=1
Potra2n17c31530	1.765	Upregulated	1	0.124	0.032	3.87763e-12	AT5G64290	dicarboxylate transport 2.1|DCT,DIT2.1	sp|C0LGQ4|MDIS2_ARATH Protein MALE DISCOVERER 2 OS=Arabidopsis thaliana OX=3702 GN=MDIS2 PE=1 SV=1
Potra2n1c16	1.77568	Upregulated	1	0.228	0.053	4.71932e-28	AT5G56350	Pyruvate kinase family protein	sp|P19680|KPYK_SPICI Pyruvate kinase (Fragment) OS=Spiroplasma citri OX=2133 GN=pyk PE=3 SV=1
Potra2n1c2248	1.78959	Upregulated	1	0.12	0.029	1.74888e-12	AT5G12860	dicarboxylate transporter 1|DiT1	sp|P0AE74|CITT_ECOLI Citrate/succinate antiporter OS=Escherichia coli (strain K12) OX=83333 GN=citT PE=3 SV=1
Potra2n1c318	1.81556	Upregulated	1	0.14	0.039	7.11435e-13	AT1G16170	ephrin-A3 protein
Potra2n6c14777	1.83191	Upregulated	1	0.387	0.1	1.94294e-49	AT2G31050	Cupredoxin superfamily protein	sp|Q5JNJ5|ENL1_ORYSJ Early nodulin-like protein 1 OS=Oryza sativa subsp. japonica OX=39947 GN=ENODL1 PE=1 SV=1
Potra2n8c18092	1.84136	Upregulated	1	0.369	0.082	1.29943e-51	AT3G22890	ATP sulfurylase 1|APS1	sp|Q54506|SAT_RIFPS Sulfate adenylyltransferase OS=Riftia pachyptila sulfur-oxidizing endosymbiont OX=35843 GN=sat PE=1 SV=1
Potra2n6c14201	1.87732	Upregulated	1	0.133	0.03	4.90485e-15	AT2G37040	PHE ammonia lyase 1|ATPAL1,PAL1	sp|Q92195|PALY_AGABI Phenylalanine ammonia-lyase (Fragment) OS=Agaricus bisporus OX=5341 GN=palA PE=2 SV=1
Potra2n14c27241	1.90318	Upregulated	1	0.108	0.018	2.07292e-15	AT4G01700	Chitinase family protein	sp|Q06015|CHI3_ARAHY Endochitinase 3 (Fragment) OS=Arachis hypogaea OX=3818 PE=2 SV=1
Potra2n6c13327	1.91044	Upregulated	1	0.314	0.072	1.56672e-42	AT4G33050	calmodulin-binding family protein|EDA39	sp|Q9LFA4|IQM3_ARATH IQ domain-containing protein IQM3 OS=Arabidopsis thaliana OX=3702 GN=IQM3 PE=2 SV=1
Potra2n1c831	1.94609	Upregulated	1	0.353	0.084	9.93509e-48	AT4G23500	Pectin lyase-like superfamily protein	sp|Q12554|PGLRC_ASPNG Probable endopolygalacturonase C OS=Aspergillus niger OX=5061 GN=pgaC PE=3 SV=1
Potra2n3c7268	1.97065	Upregulated	1	0.325	0.08	9.52055e-42	AT5G53340	Galactosyltransferase family protein	sp|Q91Z92|B3GT6_MOUSE Beta-1,3-galactosyltransferase 6 OS=Mus musculus OX=10090 GN=B3galt6 PE=2 SV=1
Potra2n6c12893	2.0185	Upregulated	1	0.185	0.031	4.77911e-29	AT2G24520	plasma membrane H+-ATPase	sp|Q8YPE9|KDPB1_NOSS1 Potassium-transporting ATPase ATP-binding subunit 1 OS=Nostoc sp. (strain PCC 7120 / SAG 25.82 / UTEX 2576) OX=103690 GN=kdpB1 PE=3 SV=1
Potra2n8c18265	2.02729	Upregulated	1	0.134	0.027	6.81739e-17	AT1G24330	ARM repeat superfamily protein	sp|Q757R0|VAC8_ASHGO Vacuolar protein 8 OS=Ashbya gossypii (strain ATCC 10895 / CBS 109.51 / FGSC 9923 / NRRL Y-1056) OX=284811 GN=VAC8 PE=3 SV=3
Potra2n4c9997	2.06019	Upregulated	1	0.123	0.021	1.16816e-17	AT2G16920	ubiquitin-conjugating enzyme 23|PFU2,UBC23	sp|P21734|UBC1_YEAST Ubiquitin-conjugating enzyme E2 1 OS=Saccharomyces cerevisiae (strain ATCC 204508 / S288c) OX=559292 GN=UBC1 PE=1 SV=1
Potra2n9c19920	2.07716	Upregulated	1	0.17	0.031	9.71227e-25	AT2G31955	cofactor of nitrate reductase and xanthine dehydrogenase 2|CNX2	sp|Q6N8F3|PQQE_RHOPA PqqA peptide cyclase OS=Rhodopseudomonas palustris (strain ATCC BAA-98 / CGA009) OX=258594 GN=pqqE PE=3 SV=1
Potra2n4c9491	2.09539	Upregulated	1	0.329	0.064	2.91462e-51	AT3G01090	SNF1 kinase homolog 10|AKIN10,KIN10,SNRK1.1	sp|Q9M0E5|VPS15_ARATH Serine/threonine-protein kinase VPS15 OS=Arabidopsis thaliana OX=3702 GN=VPS15 PE=1 SV=1
Potra2n6c12957	2.11615	Upregulated	1	0.142	0.028	8.09945e-19	AT4G31860	Protein phosphatase 2C family protein	sp|Q9WTR8|PHLP1_RAT PH domain leucine-rich repeat protein phosphatase 1 OS=Rattus norvegicus OX=10116 GN=Phlpp1 PE=1 SV=1
Potra2n5c11037	2.11871	Upregulated	1	0.159	0.027	2.53573e-24	AT3G59090	tobamovirus multiplication protein
Potra2n11c22643	2.26237	Upregulated	1	0.299	0.06	3.01815e-46	AT5G54800	glucose 6-phosphate/phosphate translocator 1|ATGPT1,GPT1	sp|Q54YK1|Y8631_DICDI Putative UDP-sugar transporter DDB_G0278631 OS=Dictyostelium discoideum OX=44689 GN=DDB_G0278631 PE=3 SV=2
Potra2n7c15864	2.28435	Upregulated	1	0.459	0.1	1.23941e-73	AT5G10350	RNA-binding (RRM/RBD/RNP motifs) family protein	sp|P42696|RBM34_HUMAN RNA-binding protein 34 OS=Homo sapiens OX=9606 GN=RBM34 PE=1 SV=2
Potra2n4c9970	2.32884	Upregulated	1	0.427	0.08	3.54118e-73	AT2G16660	Major facilitator superfamily protein	sp|F4I9E1|NFD4_ARATH Protein NUCLEAR FUSION DEFECTIVE 4 OS=Arabidopsis thaliana OX=3702 GN=NFD4 PE=3 SV=1
Potra2n17c31209	2.40087	Upregulated	1	0.107	0.017	8.33645e-16	AT5G39785	hypothetical protein (DUF1666)
Potra2n2c4359	2.46091	Upregulated	1	0.148	0.021	5.14498e-25	AT3G59310	solute carrier family 35 protein (DUF914)	sp|O59785|YCN8_SCHPO Uncharacterized solute carrier family 35 member C320.08 OS=Schizosaccharomyces pombe (strain 972 / ATCC 24843) OX=284812 GN=SPCC320.08 PE=1 SV=1
Potra2n3c6974	2.5635	Upregulated	1	0.178	0.022	1.07021e-33	AT5G13110	glucose-6-phosphate dehydrogenase 2|G6PD2	sp|Q24625|G6PD_DROSI Glucose-6-phosphate 1-dehydrogenase (Fragment) OS=Drosophila simulans OX=7240 GN=Zw PE=2 SV=1
Potra2n18c33021	2.58691	Upregulated	1	0.16	0.018	4.02492e-31	AT4G32295	histone acetyltransferase
Potra2n1c2120	2.59992	Upregulated	1	0.113	0.015	6.9521e-19	AT2G29260	NAD(P)-binding Rossmann-fold superfamily protein	sp|Q03326|OXIR_STRAT Probable oxidoreductase OS=Streptomyces antibioticus OX=1890 PE=3 SV=1
Potra2n2c6137	2.63791	Upregulated	1	0.433	0.074	1.21667e-81	AT1G19600	pfkB-like carbohydrate kinase family protein	sp|Q93Z01|MIK_ARATH Inositol 3-kinase OS=Arabidopsis thaliana OX=3702 GN=At5g58730 PE=2 SV=1
Potra2n5c12621	2.71155	Upregulated	1	0.994	0.538	4.3337e-281	AT5G27760	Hypoxia-responsive family protein
Potra2n15c27988	2.73346	Upregulated	1	0.476	0.066	1.23597e-100	AT5G23760	Copper transport protein family	sp|O03982|HIP39_ARATH Heavy metal-associated isoprenylated plant protein 39 OS=Arabidopsis thaliana OX=3702 GN=HIPP39 PE=2 SV=1
Potra2n8c17392	2.78283	Upregulated	1	0.177	0.019	1.34164e-35	AT2G02990	ribonuclease 1|ATRNS1,RNS1	sp|P24657|RNTR_HYPRU Ribonuclease Trv OS=Hypocrea rufa OX=5547 PE=1 SV=1
Potra2n2c4957	2.79426	Upregulated	1	0.722	0.148	6.13341e-159	AT5G41340	ubiquitin conjugating enzyme 4|ATUBC4,UBC4	sp|O00102|UBC7_SCHPO Ubiquitin-conjugating enzyme E2-18 kDa OS=Schizosaccharomyces pombe (strain 972 / ATCC 24843) OX=284812 GN=ubc7 PE=1 SV=2
Potra2n15c28993	2.82415	Upregulated	1	0.136	0.012	2.98509e-28	AT5G24090	chitinase A|ATCHIA,CHIA	sp|D4AT07|CHI1_ARTBC Probable endochitinase ARB_07371 OS=Arthroderma benhamiae (strain ATCC MYA-4681 / CBS 112371) OX=663331 GN=ARB_07371 PE=3 SV=1
Potra2n1c3259	2.8422	Upregulated	1	0.889	0.251	1.06053e-215	AT4G05390	root FNR 1|ATRFNR1,RFNR1	sp|Q6NRG5|NDOR1_XENLA NADPH-dependent diflavin oxidoreductase 1 OS=Xenopus laevis OX=8355 GN=ndor1 PE=2 SV=1
Potra2n10c21425	2.96253	Upregulated	1	0.137	0.013	1.43372e-27	AT2G01300	mediator of RNA polymerase II transcription subunit
Potra2n6c14477	2.99007	Upregulated	1	0.249	0.024	5.47521e-55	AT2G38120	Transmembrane amino acid transporter family protein	sp|F4HW02|GAT1_ARATH GABA transporter 1 OS=Arabidopsis thaliana OX=3702 GN=GAT1 PE=1 SV=1
Potra2n4c9465	3.04188	Upregulated	1	0.53	0.07	1.94041e-120	AT3G47520	malate dehydrogenase|MDH	sp|C0MFB5|LDH_STRS7 L-lactate dehydrogenase OS=Streptococcus equi subsp. zooepidemicus (strain H70) OX=553483 GN=ldh PE=3 SV=1
Potra2n1c796	3.06674	Upregulated	1	0.531	0.069	6.23007e-124	AT5G41670	6-phosphogluconate dehydrogenase family protein	sp|Q55702|Y229_SYNY3 Uncharacterized oxidoreductase slr0229 OS=Synechocystis sp. (strain PCC 6803 / Kazusa) OX=1111708 GN=slr0229 PE=3 SV=1
Potra2n1c3307	3.12222	Upregulated	1	0.141	0.011	2.24771e-31	AT1G17110	ubiquitin-specific protease 15	sp|Q8BW70|UBP38_MOUSE Ubiquitin carboxyl-terminal hydrolase 38 OS=Mus musculus OX=10090 GN=Usp38 PE=1 SV=2
Potra2n10c21610	3.2762	Upregulated	1	0.1	0.008	7.32902e-21	AT1G70260	nodulin MtN21 /EamA-like transporter family protein	sp|F4HZQ7|WTR5_ARATH WAT1-related protein At1g21890 OS=Arabidopsis thaliana OX=3702 GN=At1g21890 PE=2 SV=1
Potra2n10c21240	3.32098	Upregulated	1	0.108	0.008	1.55477e-23	AT3G25560	NSP-interacting kinase 2|NIK2	sp|O73792|TIE1_DANRE Tyrosine-protein kinase receptor Tie-1 (Fragment) OS=Danio rerio OX=7955 GN=tie1 PE=2 SV=1
Potra2n1c827	3.48472	Upregulated	1	0.733	0.092	1.14285e-203	AT1G63940	monodehydroascorbate reductase 6|MDAR6	sp|Q5NVA2|TRXR1_PONAB Thioredoxin reductase 1, cytoplasmic OS=Pongo abelii OX=9601 GN=TXNRD1 PE=2 SV=3
Potra2n700s36526	3.48848	Upregulated	1	0.451	0.037	3.90891e-117	AT5G40850	urophorphyrin methylase 1	sp|P21639|COBI_SINSX Precorrin-2 C(20)-methyltransferase OS=Sinorhizobium sp. OX=42445 GN=cobI PE=1 SV=2
Potra2n14c27006	3.51472	Upregulated	1	0.964	0.2	6.10831e-301	AT3G61440	cysteine synthase C1|ARATH;BSAS3;1,ATCYSC1,CYSC1	sp|Q2YY67|TDCB_STAAB L-threonine dehydratase catabolic TdcB OS=Staphylococcus aureus (strain bovine RF122 / ET3-1) OX=273036 GN=tdcB PE=3 SV=2
Potra2n9c19486	3.60598	Upregulated	1	0.282	0.02	1.14166e-70	AT3G52140	tetratricopeptide repeat (TPR)-containing protein	sp|Q7Z494|NPHP3_HUMAN Nephrocystin-3 OS=Homo sapiens OX=9606 GN=NPHP3 PE=1 SV=1
Potra2n9c18689	3.7734	Upregulated	1	0.971	0.246	0	AT2G27510	ferredoxin 3|ATFD3,FD3	sp|P23101|XYLZ_PSEPU Toluate 1,2-dioxygenase electron transfer component OS=Pseudomonas putida OX=303 GN=xylZ PE=3 SV=1
Potra2n3c7270	4.0441	Upregulated	1	0.813	0.091	6.09945e-255	AT5G41670	6-phosphogluconate dehydrogenase family protein	sp|Q55702|Y229_SYNY3 Uncharacterized oxidoreductase slr0229 OS=Synechocystis sp. (strain PCC 6803 / Kazusa) OX=1111708 GN=slr0229 PE=3 SV=1
Potra2n1c494	4.04721	Upregulated	1	0.74	0.066	8.03006e-228	AT5G13110	glucose-6-phosphate dehydrogenase 2|G6PD2	sp|Q24625|G6PD_DROSI Glucose-6-phosphate 1-dehydrogenase (Fragment) OS=Drosophila simulans OX=7240 GN=Zw PE=2 SV=1
Potra2n5c11357	4.32592	Upregulated	1	0.237	0.012	6.02126e-63	AT1G22170	Phosphoglycerate mutase family protein	sp|F4KI56|SERCL_ARATH Metal-independent phosphoserine phosphatase OS=Arabidopsis thaliana OX=3702 GN=IPSP PE=1 SV=1
Potra2n4c10189	4.33305	Upregulated	1	0.953	0.147	0	AT2G27510	ferredoxin 3|ATFD3,FD3	sp|P23101|XYLZ_PSEPU Toluate 1,2-dioxygenase electron transfer component OS=Pseudomonas putida OX=303 GN=xylZ PE=3 SV=1
Potra2n3c7064	4.4534	Upregulated	1	0.156	0.006	6.2612e-41	AT3G16560	Protein phosphatase 2C family protein	sp|Q0D673|P2C62_ORYSJ Probable protein phosphatase 2C 62 OS=Oryza sativa subsp. japonica OX=39947 GN=Os07g0507000 PE=2 SV=1
Potra2n9c19175	4.87998	Upregulated	1	0.409	0.015	1.84485e-124
Potra2n9c19145	5.64392	Upregulated	1	0.794	0.031	3.13835e-291	AT2G16070	plastid division2|PDV2	sp|Q9FK13|PDV1_ARATH Plastid division protein PDV1 OS=Arabidopsis thaliana OX=3702 GN=PDV1 PE=1 SV=1
Potra2n7c15962	1.07508	Upregulated	3	0.17	0.058	0.00094995	AT5G50080	ethylene response factor 110|ERF110	sp|A0A0N7KJT8|APL25_ORYSJ APETALA2-like protein 5 OS=Oryza sativa subsp. japonica OX=39947 GN=AP2-5 PE=2 SV=1	AP2-EREBP
Potra2n5c12062	1.0872	Upregulated	3	0.942	0.565	2.32833e-52	AT5G64750	Integrase-type DNA-binding superfamily protein|ABR1	sp|Q84TB5|AP22_ORYSJ APETALA2-like protein 2 OS=Oryza sativa subsp. japonica OX=39947 GN=AP2-2 PE=1 SV=1	AP2-EREBP
Potra2n5c11113	1.2026	Upregulated	3	0.338	0.094	1.40355e-14	AT5G50080	ethylene response factor 110|ERF110	sp|Q2TQ34|AP21_ORYSJ APETALA2-like protein 1 OS=Oryza sativa subsp. japonica OX=39947 GN=AP2-1 PE=1 SV=1	AP2-EREBP
Potra2n13c25901	1.68642	Upregulated	3	0.136	0.03	4.79289e-05	AT3G23240	ethylene response factor 1|ATERF1,ERF1	sp|Q9FGC9|EF121_ARATH Putative ethylene-responsive transcription factor ERF121 OS=Arabidopsis thaliana OX=3702 GN=ERF121 PE=3 SV=1	AP2-EREBP
Potra2n9c19330	1.26012	Upregulated	3	0.153	0.041	0.000157934	AT3G49940	LOB domain-containing protein 38|LBD38	sp|Q9CA30|LBD42_ARATH LOB domain-containing protein 42 OS=Arabidopsis thaliana OX=3702 GN=LBD42 PE=2 SV=1	AS2-LOB
Potra2n18c32068	1.01784	Upregulated	3	0.466	0.182	4.86389e-15	AT5G57150	basic helix-loop-helix (bHLH) DNA-binding superfamily protein	sp|A0A3Q7HES4|MTB2_SOLLC Transcription factor MTB2 OS=Solanum lycopersicum OX=4081 GN=MTB2 PE=2 SV=1	bHLH
Potra2n4c8651	1.28851	Upregulated	3	0.21	0.053	3.06477e-08	AT1G61660	basic helix-loop-helix (bHLH) DNA-binding superfamily protein	sp|Q2QQ32|BH133_ORYSJ Transcription factor BHLH133 OS=Oryza sativa subsp. japonica OX=39947 GN=BHLH133 PE=2 SV=1	bHLH
Potra2n9c19481	1.74271	Upregulated	3	0.331	0.067	6.9279e-20	AT2G42280	basic helix-loop-helix (bHLH) DNA-binding superfamily protein	sp|Q84WK0|BH085_ARATH Transcription factor bHLH85 OS=Arabidopsis thaliana OX=3702 GN=BHLH85 PE=2 SV=1	bHLH
Potra2n10c21811	1.75098	Upregulated	3	0.102	0.023	0.00804801	AT4G14410	basic helix-loop-helix (bHLH) DNA-binding superfamily protein|bHLH104	sp|Q9C682|BH115_ARATH Transcription factor bHLH115 OS=Arabidopsis thaliana OX=3702 GN=BHLH115 PE=1 SV=1	bHLH
Potra2n3c7255	1.62382	Upregulated	3	0.12	0.023	0.000152982	AT5G41790	COP1-interactive protein 1	sp|F4JZY1|CIP1_ARATH COP1-interactive protein 1 OS=Arabidopsis thaliana OX=3702 GN=CIP1 PE=1 SV=1	bZIP
Potra2n1c3729	1.00673	Upregulated	3	0.251	0.092	2.2198e-06	AT3G12920	SBP (S-ribonuclease binding protein) family protein	sp|F4IDI6|BRG2_ARATH Probable BOI-related E3 ubiquitin-protein ligase 2 OS=Arabidopsis thaliana OX=3702 GN=BRG2 PE=1 SV=1	C2H2
Potra2n13c26069	1.16219	Upregulated	3	0.229	0.071	4.20714e-07	AT3G05200	RING/U-box superfamily protein|ATL6	sp|P38239|YBR2_YEAST Uncharacterized RING finger protein YBR062C OS=Saccharomyces cerevisiae (strain ATCC 204508 / S288c) OX=559292 GN=YBR062C PE=1 SV=2	C2H2
Potra2n12c24705	1.30346	Upregulated	3	0.212	0.06	1.97742e-07	AT5G45100	SBP (S-ribonuclease binding protein) family protein	sp|F4IDI6|BRG2_ARATH Probable BOI-related E3 ubiquitin-protein ligase 2 OS=Arabidopsis thaliana OX=3702 GN=BRG2 PE=1 SV=1	C2H2
Potra2n5c12524	1.35698	Upregulated	3	0.197	0.053	3.20294e-07	AT3G05200	RING/U-box superfamily protein|ATL6	sp|Q9Y6U7|RN215_HUMAN RING finger protein 215 OS=Homo sapiens OX=9606 GN=RNF215 PE=4 SV=2	C2H2
Potra2n9c18966	1.39083	Upregulated	3	0.24	0.067	3.01655e-09	AT4G38680	glycine rich protein 2|ATCSP2,CSDP2,CSP2,GRP2	sp|Q51929|CSPA_PHOLD Major cold shock protein (Fragment) OS=Photobacterium leiognathi subsp. mandapamensis OX=48408 GN=cspA PE=3 SV=1	CCHC(Zn)
Potra2n4c9127	1.0405	Upregulated	3	0.184	0.065	0.000644038	AT5G52510	SCARECROW-like 8|SCL8	sp|Q2V2T9|SCL16_ARATH Putative scarecrow-like protein 16 OS=Arabidopsis thaliana OX=3702 GN=SCL16 PE=5 SV=1	GRAS
Potra2n1c2095	1.27759	Upregulated	3	0.231	0.06	2.85086e-09	AT1G07530	SCARECROW-like 14|ATGRAS2,GRAS2,SCL14	sp|Q7XJM8|SCL27_ARATH Scarecrow-like protein 27 OS=Arabidopsis thaliana OX=3702 GN=SCL27 PE=2 SV=1	GRAS
Potra2n7c16575	1.06136	Upregulated	3	0.405	0.15	6.64287e-13	AT4G37790	Homeobox-leucine zipper protein family|HAT22	sp|Q6H6S3|HOX24_ORYSJ Homeobox-leucine zipper protein HOX24 OS=Oryza sativa subsp. japonica OX=39947 GN=HOX24 PE=2 SV=1	Homobox-WOX
Potra2n4c9980	-1.55635	Downregulated	3	0.116	0.205	0.000209429	AT4G38620	myb domain protein 4|ATMYB4,MYB4	sp|Q9LNI5|ETC1_ARATH MYB-like transcription factor ETC1 OS=Arabidopsis thaliana OX=3702 GN=ETC1 PE=2 SV=1	MYB-HB-like
Potra2n5c11718	2.63259	Upregulated	3	0.129	0.014	1.90034e-07	AT1G19510	RAD-like 5|ATRL5,RL5,RSM4	sp|Q9FNN6|SRM1_ARATH Transcription factor SRM1 OS=Arabidopsis thaliana OX=3702 GN=SRM1 PE=1 SV=1	MYB-HB-like
Potra2n5c10502	1.4016	Upregulated	3	0.128	0.03	0.000486171	AT1G21000	PLATZ transcription factor family protein		Znf-B
Potra2n10c21889	1.15154	Upregulated	3	0.287	0.088	2.63929e-10	AT4G13510	ammonium transporter 1;1|AMT1;1,ATAMT1,ATAMT1;1	sp|Q69D47|RHBG_ORYLA Ammonium transporter Rh type B OS=Oryzias latipes OX=8090 GN=rhbg PE=2 SV=1
Potra2n18c32565	1.16328	Upregulated	3	0.314	0.099	1.04017e-11	AT5G19550	aspartate aminotransferase 2|AAT2,ASP2	sp|Q7TSV6|AATC2_MOUSE Putative aspartate aminotransferase, cytoplasmic 2 OS=Mus musculus OX=10090 GN=Got1l1 PE=2 SV=1
Potra2n12c24793	1.35817	Upregulated	3	0.189	0.053	2.36877e-06	AT4G21120	amino acid transporter 1	sp|Q46065|AROP_CORGL Aromatic amino acid transport protein AroP OS=Corynebacterium glutamicum (strain ATCC 13032 / DSM 20300 / JCM 1318 / LMG 3730 / NCIMB 10025) OX=196627 GN=aroP PE=3 SV=1
Potra2n8c18472	1.49757	Upregulated	3	0.147	0.032	1.43746e-05	AT5G35630	glutamine synthetase 2|ATGSL1,GLN2,GS2	sp|Q9CDL9|GLN1A_LACLA Glutamine synthetase OS=Lactococcus lactis subsp. lactis (strain IL1403) OX=272623 GN=glnA PE=3 SV=1
Potra2n12c23912	1.02711	Upregulated	3	0.155	0.053	0.00606362	AT5G53460	NADH-dependent glutamate synthase 1|GLT1	sp|Q58931|TRXB_METJA Putative thioredoxin reductase OS=Methanocaldococcus jannaschii (strain ATCC 43067 / DSM 2661 / JAL-1 / JCM 10045 / NBRC 100440) OX=243232 GN=MJ1536 PE=3 SV=1
Potra2n4c9696	5.40118	Upregulated	3	0.4	0.007	1.6551e-47	AT2G15620	nitrite reductase 1|ATHNIR,NIR,NIR1	sp|P21637|COBG_SINSX Precorrin-3B synthase OS=Sinorhizobium sp. OX=42445 GN=cobG PE=3 SV=2
Potra2n15c28440	5.03516	Upregulated	3	0.168	0.002	8.97114e-15	AT5G50200	nitrate transmembrane transporter|ATNRT3.1,NRT3.1,WR3	sp|Q7XK12|NAR22_ORYSJ Probable high-affinity nitrate transporter-activating protein 2.2 OS=Oryza sativa subsp. japonica OX=39947 GN=NAR2.2 PE=2 SV=1
Potra2n1c2237	1.5224	Upregulated	3	0.225	0.053	2.79924e-10	AT5G04590	sulfite reductase|SIR	sp|P38500|NIR_BETPN Ferredoxin--nitrite reductase, chloroplastic OS=Betula pendula OX=3505 GN=NIR1 PE=2 SV=1
Potra2n3c8281	-3.8575	Downregulated	3	0.02	0.15	1.3503e-25
Potra2n6c15022	-2.89913	Downregulated	3	0.029	0.12	6.74607e-11	AT4G10620	P-loop containing nucleoside triphosphate hydrolases superfamily protein	sp|Q09700|YA29_SCHPO Uncharacterized protein C2F7.09c OS=Schizosaccharomyces pombe (strain 972 / ATCC 24843) OX=284812 GN=SPAC2F7.09c PE=4 SV=1
Potra2n6c13010	-1.91249	Downregulated	3	0.083	0.166	0.000227639	AT4G32020	serine/arginine repetitive matrix-like protein
Potra2n12c24113	-1.88889	Downregulated	3	0.095	0.187	2.02091e-05
Potra2n2c6369	-1.87863	Downregulated	3	0.063	0.136	0.0024222	AT1G42470	Patched family protein	sp|P18502|PTC_DROME Protein patched OS=Drosophila melanogaster OX=7227 GN=ptc PE=2 SV=2
Potra2n4c8695	-1.76792	Downregulated	3	0.104	0.194	7.42765e-05	AT4G21490	NAD(P)H dehydrogenase B3	sp|P75393|DLDH_MYCPN Dihydrolipoyl dehydrogenase OS=Mycoplasma pneumoniae (strain ATCC 29342 / M129) OX=272634 GN=pdhD PE=1 SV=1
Potra2n11c22691	-1.72273	Downregulated	3	0.088	0.173	0.000212533
Potra2n7c16513	-1.60559	Downregulated	3	0.169	0.309	1.64085e-11	AT2G18050	histone H1-3|HIS1-3	sp|Q08864|H11_VOLCA Histone H1-I OS=Volvox carteri OX=3067 GN=H1-I PE=2 SV=3
Potra2n3c6926	-1.56586	Downregulated	3	0.153	0.251	1.80131e-05	AT1G67360	Rubber elongation factor protein (REF)	sp|P15252|REF_HEVBR Rubber elongation factor protein OS=Hevea brasiliensis OX=3981 PE=1 SV=2
Potra2n5c12570	-1.40746	Downregulated	3	0.139	0.226	0.000728766	AT5G27550	P-loop containing nucleoside triphosphate hydrolases superfamily protein	sp|Q22875|SHOC2_CAEEL Leucine-rich repeat protein soc-2 OS=Caenorhabditis elegans OX=6239 GN=soc-2 PE=1 SV=3
Potra2n8c18502	-1.32978	Downregulated	3	0.258	0.362	1.30882e-07	AT5G19140	aluminum induced protein with YGL and LRDR motifs|AILP1,ATAILP1	sp|Q54MB4|ASNS_DICDI Probable asparagine synthetase [glutamine-hydrolyzing] OS=Dictyostelium discoideum OX=44689 GN=asns PE=1 SV=1
Potra2n1c2826	-1.32941	Downregulated	3	0.3	0.41	1.82367e-10	AT3G02040	senescence-related gene 3|SRG3	sp|Q21407|GPCP1_CAEEL Putative glycerophosphocholine phosphodiesterase GPCPD1 homolog 1 OS=Caenorhabditis elegans OX=6239 GN=gpcp-1 PE=3 SV=2
Potra2n7c16182	-1.29664	Downregulated	3	0.189	0.27	0.0022489
Potra2n16c30051	-1.12644	Downregulated	3	0.292	0.362	0.000296268	AT2G37090	Nucleotide-diphospho-sugar transferases superfamily protein|IRX9	sp|Q9WU47|B3GA3_CRIGR Galactosylgalactosylxylosylprotein 3-beta-glucuronosyltransferase 3 OS=Cricetulus griseus OX=10029 GN=B3GAT3 PE=2 SV=1
Potra2n13c25015	-1.03493	Downregulated	3	0.471	0.532	1.02262e-09	AT5G06920	FASCICLIN-like arabinogalactan protein 21 precursor|FLA21	sp|Q9FL53|FLA21_ARATH Fasciclin-like arabinogalactan protein 21 OS=Arabidopsis thaliana OX=3702 GN=FLA21 PE=2 SV=1
Potra2n6c13559	1.01742	Upregulated	3	0.323	0.115	1.80362e-09	AT1G70600	Ribosomal protein L18e/L15 superfamily protein	sp|A1RWR4|RL15_THEPD 50S ribosomal protein L15 OS=Thermofilum pendens (strain DSM 2475 / Hrk 5) OX=368408 GN=rpl15 PE=3 SV=1
Potra2n2c6336	1.02125	Upregulated	3	0.744	0.353	3.35665e-29
Potra2n1c831	1.0213	Upregulated	3	0.247	0.071	7.37881e-09	AT4G23500	Pectin lyase-like superfamily protein	sp|Q12554|PGLRC_ASPNG Probable endopolygalacturonase C OS=Aspergillus niger OX=5061 GN=pgaC PE=3 SV=1
Potra2n3c6761	1.02416	Upregulated	3	0.127	0.035	0.0034011	AT3G12400	Ubiquitin-conjugating enzyme/RWD-like protein|ATELC,ELC	sp|P25604|STP22_YEAST Suppressor protein STP22 of temperature-sensitive alpha-factor receptor and arginine permease OS=Saccharomyces cerevisiae (strain ATCC 204508 / S288c) OX=559292 GN=STP22 PE=1 SV=3
Potra2n16c29620	1.0258	Upregulated	3	0.306	0.106	7.68972e-09	AT5G04170	Calcium-binding EF-hand family protein	sp|O14815|CAN9_HUMAN Calpain-9 OS=Homo sapiens OX=9606 GN=CAPN9 PE=1 SV=1
Potra2n10c21738	1.03232	Upregulated	3	0.202	0.067	1.29553e-05	AT3G22890	ATP sulfurylase 1|APS1	sp|Q54506|SAT_RIFPS Sulfate adenylyltransferase OS=Riftia pachyptila sulfur-oxidizing endosymbiont OX=35843 GN=sat PE=1 SV=1
Potra2n16c29358	1.03648	Upregulated	3	0.329	0.118	5.75023e-10	AT3G51970	acyl-CoA sterol acyl transferase 1|ASAT1,ATASAT1,ATSAT1	sp|Q9FJ78|WAXS7_ARATH Probable long-chain-alcohol O-fatty-acyltransferase 7 OS=Arabidopsis thaliana OX=3702 GN=AT7 PE=3 SV=1
Potra2n8c17356	1.03758	Upregulated	3	0.824	0.415	2.60918e-36	AT1G54320	LEM3 (ligand-effect modulator 3) family protein / CDC50 family protein	sp|A0ZT23|CC50C_PANTR Cell cycle control protein 50C OS=Pan troglodytes OX=9598 GN=TMEM30C PE=2 SV=2
Potra2n6c12893	1.03804	Upregulated	3	0.352	0.122	1.39627e-11	AT2G24520	plasma membrane H+-ATPase	sp|Q8YPE9|KDPB1_NOSS1 Potassium-transporting ATPase ATP-binding subunit 1 OS=Nostoc sp. (strain PCC 7120 / SAG 25.82 / UTEX 2576) OX=103690 GN=kdpB1 PE=3 SV=1
Potra2n18c32312	1.04625	Upregulated	3	0.739	0.334	1.23254e-28	AT1G13950	eukaryotic elongation factor 5A-1|ATELF5A-1,EIF-5A,EIF5A,ELF5A-1	sp|Q8PYE0|IF5A_METMA Translation initiation factor 5A OS=Methanosarcina mazei (strain ATCC BAA-159 / DSM 3647 / Goe1 / Go1 / JCM 11833 / OCM 88) OX=192952 GN=eif5a PE=3 SV=1
Potra2n6c14997	1.04763	Upregulated	3	0.189	0.065	0.000200911	AT5G04170	Calcium-binding EF-hand family protein	sp|O14815|CAN9_HUMAN Calpain-9 OS=Homo sapiens OX=9606 GN=CAPN9 PE=1 SV=1
Potra2n11c23358	1.05672	Upregulated	3	0.176	0.06	0.000474408	AT3G09010	Protein kinase superfamily protein	sp|P00529|ROS_AVISU Tyrosine-protein kinase transforming protein ros OS=UR2 sarcoma virus OX=354090 GN=V-ROS PE=3 SV=1
Potra2n1c3076	1.06464	Upregulated	3	0.156	0.048	0.000663178	AT3G28450	Leucine-rich repeat protein kinase family protein	sp|Q9Z2W1|STK25_MOUSE Serine/threonine-protein kinase 25 OS=Mus musculus OX=10090 GN=Stk25 PE=1 SV=2
Potra2n10c21426	1.06801	Upregulated	3	0.199	0.06	6.26598e-06	AT2G01300	mediator of RNA polymerase II transcription subunit
Potra2n14c26841	1.0684	Upregulated	3	0.263	0.071	2.50558e-10	AT3G60750	Transketolase	sp|B1I3J6|DXS_DESAP 1-deoxy-D-xylulose-5-phosphate synthase OS=Desulforudis audaxviator (strain MP104C) OX=477974 GN=dxs PE=3 SV=1
Potra2n4c9970	1.07061	Upregulated	3	0.658	0.279	5.81475e-26	AT2G16660	Major facilitator superfamily protein	sp|F4I9E1|NFD4_ARATH Protein NUCLEAR FUSION DEFECTIVE 4 OS=Arabidopsis thaliana OX=3702 GN=NFD4 PE=3 SV=1
Potra2n2c4494	1.07459	Upregulated	3	0.995	0.82	5.19947e-82	AT5G35735	Auxin-responsive family protein	sp|A2VE04|FRRS1_BOVIN Ferric-chelate reductase 1 OS=Bos taurus OX=9913 GN=FRRS1 PE=2 SV=1
Potra2n2c5676	1.08288	Upregulated	3	0.336	0.111	7.25862e-12	AT1G77490	thylakoidal ascorbate peroxidase	sp|Q9PBB2|KATG_XYLFA Catalase-peroxidase OS=Xylella fastidiosa (strain 9a5c) OX=160492 GN=katG PE=3 SV=1
Potra2n2c4478	1.08341	Upregulated	3	0.342	0.118	2.05195e-11	AT2G04520	Nucleic acid-binding, OB-fold-like protein	sp|O59280|IF1A_PYRHO Translation initiation factor 1A OS=Pyrococcus horikoshii (strain ATCC 700860 / DSM 12428 / JCM 9974 / NBRC 100139 / OT-3) OX=70601 GN=eIF1A PE=3 SV=2
Potra2n12c24758	1.08797	Upregulated	3	0.801	0.359	1.44378e-40	AT5G62350	Plant invertase/pectin methylesterase inhibitor superfamily protein	sp|Q9LXK7|PME32_ARATH Probable pectinesterase/pectinesterase inhibitor 32 OS=Arabidopsis thaliana OX=3702 GN=PME32 PE=2 SV=1
Potra2n12c24791	1.11368	Upregulated	3	0.328	0.115	9.82151e-11	AT5G62190	DEAD box RNA helicase (PRH75)|PRH75	sp|Q944S1|RH22_ARATH DEAD-box ATP-dependent RNA helicase 22 OS=Arabidopsis thaliana OX=3702 GN=RH22 PE=2 SV=1
Potra2n1c3106	1.11672	Upregulated	3	0.212	0.062	7.30588e-07
Potra2n6c13790	1.12186	Upregulated	3	0.317	0.101	6.0034e-11
Potra2n1c70	1.13822	Upregulated	3	0.264	0.083	8.99168e-09	AT2G20142	Toll-Interleukin-Resistance (TIR) domain family protein
Potra2n14c27474	1.14535	Upregulated	3	0.148	0.041	0.000484335
Potra2n15c28122	1.1517	Upregulated	3	0.645	0.249	2.59703e-28	AT5G62350	Plant invertase/pectin methylesterase inhibitor superfamily protein	sp|Q8GX86|PME21_ARATH Probable pectinesterase/pectinesterase inhibitor 21 OS=Arabidopsis thaliana OX=3702 GN=PME21 PE=2 SV=2
Potra2n2c6421	1.15204	Upregulated	3	0.285	0.094	2.83234e-09	AT1G76490	hydroxy methylglutaryl CoA reductase 1|HMG1,HMGR1	sp|O28538|HMDH_ARCFU 3-hydroxy-3-methylglutaryl-coenzyme A reductase OS=Archaeoglobus fulgidus (strain ATCC 49558 / VC-16 / DSM 4304 / JCM 9628 / NBRC 100126) OX=224325 GN=hmgA PE=3 SV=1
Potra2n9c19881	1.15398	Upregulated	3	0.167	0.055	0.000782721	AT5G59960	K-stimulated pyrophosphate-energized sodium pump protein
Potra2n1c721	1.16084	Upregulated	3	0.687	0.263	3.18678e-31
Potra2n15c29219	1.16419	Upregulated	3	0.415	0.141	3.89007e-15	AT5G24660	response to low sulfur 2|LSU2	sp|Q9SCK2|LSU3_ARATH Protein RESPONSE TO LOW SULFUR 3 OS=Arabidopsis thaliana OX=3702 GN=LSU3 PE=4 SV=1
Potra2n14c27704	1.16486	Upregulated	3	0.615	0.242	1.93223e-24	AT5G14780	formate dehydrogenase	sp|P53100|YGT5_YEAST Putative 2-hydroxyacid dehydrogenase YGL185C OS=Saccharomyces cerevisiae (strain ATCC 204508 / S288c) OX=559292 GN=YGL185C PE=1 SV=1
Potra2n13c26203	1.165	Upregulated	3	0.166	0.053	0.000463124	AT5G07090	Ribosomal protein S4 (RPS4A) family protein	sp|Q6L1B5|RS4E_PICTO 30S ribosomal protein S4e OS=Picrophilus torridus (strain ATCC 700027 / DSM 9790 / JCM 10055 / NBRC 100828) OX=263820 GN=rps4e PE=3 SV=1
Potra2n4c10368	1.17123	Upregulated	3	0.138	0.044	0.00912072	AT4G24330	hypothetical protein (DUF1682)	sp|Q6AZI2|CCD47_XENLA Coiled-coil domain-containing protein 47 OS=Xenopus laevis OX=8355 GN=ccdc47 PE=2 SV=1
Potra2n8c17924	1.17312	Upregulated	3	0.257	0.083	2.99416e-08	AT2G37870	Bifunctional inhibitor/lipid-transfer protein/seed storage 2S albumin superfamily protein
Potra2n4c9465	1.17676	Upregulated	3	0.215	0.065	5.13911e-07	AT3G47520	malate dehydrogenase|MDH	sp|C0MFB5|LDH_STRS7 L-lactate dehydrogenase OS=Streptococcus equi subsp. zooepidemicus (strain H70) OX=553483 GN=ldh PE=3 SV=1
Potra2n15c28938	1.17896	Upregulated	3	0.357	0.111	9.44331e-14	AT5G37490	ARM repeat superfamily protein	sp|Q5UQ40|UBC4_MIMIV Probable bifunctional E2/E3 enzyme R795 OS=Acanthamoeba polyphaga mimivirus OX=212035 GN=MIMI_R795 PE=3 SV=1
Potra2n4c9976	1.18689	Upregulated	3	0.965	0.594	2.83408e-72	AT2G17840	Senescence/dehydration-associated protein-like protein|ERD7	sp|Q9SD22|SDEH3_ARATH Senescence/dehydration-associated protein At3g51250 OS=Arabidopsis thaliana OX=3702 GN=At3g51250 PE=2 SV=1
Potra2n4c10334	1.19023	Upregulated	3	0.182	0.058	6.3963e-05	AT1G10950	transmembrane nine 1|AtTMN1,TMN1	sp|Q7YTA6|PHG1C_DICDI Putative phagocytic receptor 1c OS=Dictyostelium discoideum OX=44689 GN=phg1c PE=2 SV=1
Potra2n6c14686	1.19188	Upregulated	3	0.178	0.051	1.21526e-05	AT2G19170	subtilisin-like serine protease 3|SLP3	sp|P07518|SUBT_BACPU Subtilisin OS=Bacillus pumilus OX=1408 GN=apr PE=1 SV=1
Potra2n4c8518	1.19388	Upregulated	3	0.918	0.454	6.75437e-61	AT4G04610	APS reductase 1|APR,APR1,ATAPR1,PRH19	sp|Q00216|TIGA_ASPNG Protein disulfide-isomerase tigA OS=Aspergillus niger OX=5061 GN=tigA PE=2 SV=1
Potra2n8c16724	1.19594	Upregulated	3	0.128	0.037	0.00565867
Potra2n14c27100	1.19794	Upregulated	3	0.799	0.357	3.7155e-40	AT4G01070	UDP-Glycosyltransferase superfamily protein|GT72B1,UGT72B1	sp|Q40286|UFOG4_MANES Anthocyanidin 3-O-glucosyltransferase 4 (Fragment) OS=Manihot esculenta OX=3983 GN=GT4 PE=2 SV=1
Potra2n18c32973	1.19893	Upregulated	3	0.347	0.104	2.78879e-14	AT2G26640	3-ketoacyl-CoA synthase 11|KCS11	sp|P48391|2PS_GERHY 2-pyrone synthase OS=Gerbera hybrida OX=18101 GN=2PS PE=1 SV=2
Potra2n6c13236	1.20172	Upregulated	3	0.131	0.037	0.00354827	AT4G26270	phosphofructokinase 3|PFK3	sp|P16861|PFKA1_YEAST ATP-dependent 6-phosphofructokinase subunit alpha OS=Saccharomyces cerevisiae (strain ATCC 204508 / S288c) OX=559292 GN=PFK1 PE=1 SV=1
Potra2n13c26245	1.20275	Upregulated	3	0.184	0.051	3.81259e-06	AT1G56560	Plant neutral invertase family protein	sp|Q9C560|INVF_ARATH Probable alkaline/neutral invertase F OS=Arabidopsis thaliana OX=3702 GN=INVF PE=2 SV=1
Potra2n2c4883	1.20678	Upregulated	3	0.14	0.041	0.00193422	AT4G01070	UDP-Glycosyltransferase superfamily protein|GT72B1,UGT72B1	sp|Q40286|UFOG4_MANES Anthocyanidin 3-O-glucosyltransferase 4 (Fragment) OS=Manihot esculenta OX=3983 GN=GT4 PE=2 SV=1
Potra2n5c10874	1.21689	Upregulated	3	0.921	0.498	1.85547e-60	AT5G63450	cytochrome P450, family 94, subfamily B, polypeptide 1|CYP94B1	sp|D5JBX0|GAO_HELAN Germacrene A hydroxylase OS=Helianthus annuus OX=4232 GN=GAO PE=1 SV=1
Potra2n11c23330	1.22212	Upregulated	3	0.147	0.037	0.000101897	AT3G58610	ketol-acid reductoisomerase	sp|Q97YJ9|ILVC2_SACS2 Putative ketol-acid reductoisomerase 2 OS=Saccharolobus solfataricus (strain ATCC 35092 / DSM 1617 / JCM 11322 / P2) OX=273057 GN=ilvC2 PE=1 SV=1
Potra2n13c25024	1.22956	Upregulated	3	0.961	0.558	6.47292e-72	AT4G27280	Calcium-binding EF-hand family protein	sp|Q8S1Y9|CML1_ORYSJ Calmodulin-like protein 1 OS=Oryza sativa subsp. japonica OX=39947 GN=CML1 PE=2 SV=1
Potra2n13c25570	1.23021	Upregulated	3	0.22	0.062	6.75932e-08
Potra2n7c15864	1.23837	Upregulated	3	0.306	0.083	1.8861e-13	AT5G10350	RNA-binding (RRM/RBD/RNP motifs) family protein	sp|P42696|RBM34_HUMAN RNA-binding protein 34 OS=Homo sapiens OX=9606 GN=RBM34 PE=1 SV=2
Potra2n6c14421	1.23933	Upregulated	3	0.112	0.028	0.00772432	AT5G01600	ferretin 1|ATFER1,FER1	sp|P41822|FRI_AEDAE Ferritin subunit OS=Aedes aegypti OX=7159 GN=FERH PE=1 SV=2
Potra2n5c11356	1.25967	Upregulated	3	0.654	0.251	6.1181e-31	AT4G08685	Pollen Ole e 1 allergen and extensin family protein|SAH7	sp|O82015|LIGV1_LIGVU Major pollen allergen Lig v 1 OS=Ligustrum vulgare OX=13597 PE=1 SV=2
Potra2n5c11635	1.26775	Upregulated	3	0.699	0.256	5.2357e-36	AT2G23620	methyl esterase 1|ATMES1,MES1	sp|C0LA90|PYRHY_SPHWJ Pyrethroid hydrolase OS=Sphingobium wenxiniae (strain DSM 21828 / JZ-1) OX=595605 GN=pytH PE=1 SV=1
Potra2n6c14271	1.27655	Upregulated	3	0.125	0.035	0.00476727	AT1G03910	cactus-binding carboxy-terminal, cactin	sp|O14342|YB3C_SCHPO Uncharacterized protein C2F12.12c OS=Schizosaccharomyces pombe (strain 972 / ATCC 24843) OX=284812 GN=SPBC2F12.12c PE=4 SV=1
Potra2n9c18819	1.29514	Upregulated	3	0.127	0.035	0.00288555	AT1G08250	arogenate dehydratase 6|ADT6	sp|P32452|PHA2_YEAST Putative prephenate dehydratase OS=Saccharomyces cerevisiae (strain ATCC 204508 / S288c) OX=559292 GN=PHA2 PE=1 SV=3
Potra2n3c7268	1.29697	Upregulated	3	0.166	0.046	3.23895e-05	AT5G53340	Galactosyltransferase family protein	sp|Q91Z92|B3GT6_MOUSE Beta-1,3-galactosyltransferase 6 OS=Mus musculus OX=10090 GN=B3galt6 PE=2 SV=1
Potra2n8c17104	1.30024	Upregulated	3	0.988	0.689	3.60637e-101	AT5G02500	heat shock cognate protein 70-1|AT-HSC70-1,HSC70,HSC70-1,HSP70-1	sp|P86237|HS71L_MESAU Heat shock 70 kDa protein 1-like (Fragments) OS=Mesocricetus auratus OX=10036 GN=HSPA1L PE=1 SV=1
Potra2n6c13838	1.30821	Upregulated	3	0.118	0.032	0.00893288	AT4G30260	Integral membrane Yip1 family protein	sp|P53093|YIP4_YEAST Protein YIP4 OS=Saccharomyces cerevisiae (strain ATCC 204508 / S288c) OX=559292 GN=YIP4 PE=1 SV=2
Potra2n4c9454	1.30928	Upregulated	3	0.158	0.037	7.0164e-06	AT3G30390	Transmembrane amino acid transporter family protein	sp|Q8R1S9|S38A4_MOUSE Sodium-coupled neutral amino acid transporter 4 OS=Mus musculus OX=10090 GN=Slc38a4 PE=1 SV=1
Potra2n11c22643	1.31738	Upregulated	3	0.135	0.032	0.000240179	AT5G54800	glucose 6-phosphate/phosphate translocator 1|ATGPT1,GPT1	sp|Q54YK1|Y8631_DICDI Putative UDP-sugar transporter DDB_G0278631 OS=Dictyostelium discoideum OX=44689 GN=DDB_G0278631 PE=3 SV=2
Potra2n5c12120	1.31953	Upregulated	3	0.213	0.055	2.30239e-08	AT5G58950	Protein kinase superfamily protein	sp|Q5UNT4|YL670_MIMIV Putative serine/threonine-protein kinase L670 OS=Acanthamoeba polyphaga mimivirus OX=212035 GN=MIMI_L670 PE=3 SV=1
Potra2n9c18807	1.34293	Upregulated	3	0.234	0.062	2.17467e-09	AT1G08230	Transmembrane amino acid transporter family protein	sp|Q9LFB2|LAX1_ARATH Auxin transporter-like protein 1 OS=Arabidopsis thaliana OX=3702 GN=LAX1 PE=2 SV=1
Potra2n5c11188	1.35488	Upregulated	3	0.131	0.037	0.00303395	AT4G19950	polyadenylate-binding protein 1-B-binding protein
Potra2n18c32622	1.36178	Upregulated	3	0.364	0.113	1.83252e-15
Potra2n2c6111	1.3762	Upregulated	3	0.199	0.051	1.16029e-07	AT1G04430	S-adenosyl-L-methionine-dependent methyltransferases superfamily protein	sp|Q9LN50|PMTS_ARATH Probable methyltransferase PMT28 OS=Arabidopsis thaliana OX=3702 GN=At1g19430 PE=2 SV=1
Potra2n10c21700	1.37782	Upregulated	3	0.175	0.046	6.0427e-06	AT2G32030	Acyl-CoA N-acyltransferases (NAT) superfamily protein	sp|P40586|YIW2_YEAST Uncharacterized protein YIR042C OS=Saccharomyces cerevisiae (strain ATCC 204508 / S288c) OX=559292 GN=YIR042C PE=4 SV=1
Potra2n9c19650	1.38349	Upregulated	3	0.124	0.03	0.00110904	AT1G50920	Nucleolar GTP-binding protein	sp|B9K736|OBG_THENN GTPase Obg OS=Thermotoga neapolitana (strain ATCC 49049 / DSM 4359 / NS-E) OX=309803 GN=obg PE=3 SV=1
Potra2n7c16022	1.3849	Upregulated	3	0.15	0.039	7.45947e-05	AT1G48920	nucleolin like 1|ATNUC-L1,NUC-L1,PARL1	sp|P42696|RBM34_HUMAN RNA-binding protein 34 OS=Homo sapiens OX=9606 GN=RBM34 PE=1 SV=2
Potra2n10c21253	1.3881	Upregulated	3	0.182	0.053	6.4784e-06	AT1G68690	Protein kinase superfamily protein	sp|Q6FKC6|SSN3_CANGA Serine/threonine-protein kinase SSN3 OS=Candida glabrata (strain ATCC 2001 / CBS 138 / JCM 3761 / NBRC 0622 / NRRL Y-65) OX=284593 GN=SSN3 PE=3 SV=1
Potra2n3c7886	1.39033	Upregulated	3	0.398	0.118	5.21889e-18	AT1G53840	pectin methylesterase 1|ATPME1,PME1	sp|P24791|PME_RALSL Pectinesterase OS=Ralstonia solanacearum OX=305 GN=pme PE=3 SV=1
Potra2n10c20707	1.40169	Upregulated	3	0.209	0.055	6.79987e-08	AT3G11320	Nucleotide-sugar transporter family protein	sp|Q9SZ96|URGT5_ARATH UDP-rhamnose/UDP-galactose transporter 5 OS=Arabidopsis thaliana OX=3702 GN=URGT5 PE=1 SV=1
Potra2n6c14201	1.40264	Upregulated	3	0.118	0.03	0.00412429	AT2G37040	PHE ammonia lyase 1|ATPAL1,PAL1	sp|Q92195|PALY_AGABI Phenylalanine ammonia-lyase (Fragment) OS=Agaricus bisporus OX=5341 GN=palA PE=2 SV=1
Potra2n9c18867	1.41201	Upregulated	3	0.191	0.053	1.46099e-06	AT2G17120	lysm domain GPI-anchored protein 2 precursor|LYM2	sp|O64825|LYK4_ARATH LysM domain receptor-like kinase 4 OS=Arabidopsis thaliana OX=3702 GN=LYK4 PE=1 SV=1
Potra2n15c28407	1.41558	Upregulated	3	0.142	0.032	3.38708e-05	AT4G24780	Pectin lyase-like superfamily protein	sp|B1B6T1|PTLY_BACSP Pectate trisaccharide-lyase OS=Bacillus sp. OX=1409 GN=pel PE=1 SV=1
Potra2n9c19521	1.41778	Upregulated	3	0.135	0.032	0.000152931	AT5G12170	CRT (chloroquine-resistance transporter)-like transporter 3	sp|Q550A6|CRTP2_DICDI Crt homolog 2 OS=Dictyostelium discoideum OX=44689 GN=crtp2 PE=3 SV=1
Potra2n7c16382	1.42497	Upregulated	3	0.12	0.028	0.00109795	AT4G36670	Major facilitator superfamily protein	sp|Q5RC45|S22AO_PONAB Steroid transmembrane transporter SLC22A24 OS=Pongo abelii OX=9601 GN=SLC22A24 PE=2 SV=1
Potra2n5c10921	1.43858	Upregulated	3	0.277	0.081	4.13175e-11	AT3G22930	calmodulin-like 11	sp|Q54IY3|CETNA_DICDI Centrin-A OS=Dictyostelium discoideum OX=44689 GN=cenA PE=3 SV=1
Potra2n10c20378	1.45641	Upregulated	3	0.194	0.044	1.85768e-08	AT3G54880	zinc finger protein
Potra2n8c17392	1.48376	Upregulated	3	0.228	0.055	4.99635e-10	AT2G02990	ribonuclease 1|ATRNS1,RNS1	sp|P24657|RNTR_HYPRU Ribonuclease Trv OS=Hypocrea rufa OX=5547 PE=1 SV=1
Potra2n8c18265	1.49297	Upregulated	3	0.164	0.037	1.52779e-06	AT1G24330	ARM repeat superfamily protein	sp|Q757R0|VAC8_ASHGO Vacuolar protein 8 OS=Ashbya gossypii (strain ATCC 10895 / CBS 109.51 / FGSC 9923 / NRRL Y-1056) OX=284811 GN=VAC8 PE=3 SV=3
Potra2n13c25725	1.52269	Upregulated	3	0.119	0.032	0.00496622	AT5G39890	2-aminoethanethiol dioxygenase, putative (DUF1637)	sp|Q556I2|AEDO_DICDI Probable 2-aminoethanethiol dioxygenase OS=Dictyostelium discoideum OX=44689 GN=ado-1 PE=4 SV=2
Potra2n2c4159	1.52333	Upregulated	3	0.794	0.295	2.70797e-55	AT3G07390	auxin-induced in root cultures-like protein|AIR12	sp|Q8VYH6|B651B_ARATH Cytochrome b561 and DOMON domain-containing protein At4g17280 OS=Arabidopsis thaliana OX=3702 GN=At4g17280 PE=2 SV=1
Potra2n7c15751	1.52495	Upregulated	3	0.447	0.12	2.40256e-24	AT5G09760	Plant invertase/pectin methylesterase inhibitor superfamily	sp|O81415|PME39_ARATH Probable pectinesterase/pectinesterase inhibitor 39 OS=Arabidopsis thaliana OX=3702 GN=PME39 PE=2 SV=1
Potra2n12c23995	1.54767	Upregulated	3	0.244	0.06	5.5185e-11	AT5G24090	chitinase A|ATCHIA,CHIA	sp|P23473|CHLY_PARTH Bifunctional chitinase/lysozyme (Fragment) OS=Parthenocissus quinquefolia OX=3607 PE=1 SV=1
Potra2n1c2884	1.55609	Upregulated	3	0.189	0.044	5.44906e-08	AT3G03470	cytochrome P450, family 87, subfamily A, polypeptide 9|CYP89A9	sp|Q2MJ20|C7A12_MEDTR Beta-amyrin 28-monooxygenase OS=Medicago truncatula OX=3880 GN=CYP716A12 PE=1 SV=1
Potra2n3c7241	1.58371	Upregulated	3	0.481	0.131	1.62223e-26
Potra2n18c32145	1.5873	Upregulated	3	0.524	0.145	1.25064e-30	AT2G31050	Cupredoxin superfamily protein	sp|Q9T076|ENL2_ARATH Early nodulin-like protein 2 OS=Arabidopsis thaliana OX=3702 GN=At4g27520 PE=1 SV=1
Potra2n1c827	1.60276	Upregulated	3	0.413	0.101	1.01863e-23	AT1G63940	monodehydroascorbate reductase 6|MDAR6	sp|Q5NVA2|TRXR1_PONAB Thioredoxin reductase 1, cytoplasmic OS=Pongo abelii OX=9601 GN=TXNRD1 PE=2 SV=3
Potra2n1c3062	1.60694	Upregulated	3	0.172	0.039	5.63899e-07	AT5G14760	L-aspartate oxidase|AO	sp|P21375|OSM1_YEAST Fumarate reductase 2 OS=Saccharomyces cerevisiae (strain ATCC 204508 / S288c) OX=559292 GN=OSM1 PE=1 SV=3
Potra2n6c13327	1.60864	Upregulated	3	0.35	0.09	5.53261e-18	AT4G33050	calmodulin-binding family protein|EDA39	sp|Q9LFA4|IQM3_ARATH IQ domain-containing protein IQM3 OS=Arabidopsis thaliana OX=3702 GN=IQM3 PE=2 SV=1
Potra2n14c27675	1.62806	Upregulated	3	0.187	0.035	1.51007e-09	AT2G05790	O-Glycosyl hydrolases family 17 protein	sp|Q93V72|PDCB4_ARATH PLASMODESMATA CALLOSE-BINDING PROTEIN 4 OS=Arabidopsis thaliana OX=3702 GN=PDCB4 PE=1 SV=1
Potra2n17c31424	1.62914	Upregulated	3	0.131	0.028	7.51731e-05	AT4G14010	ralf-like 32|RALFL32	sp|O23262|RLF32_ARATH Protein RALF-like 32 OS=Arabidopsis thaliana OX=3702 GN=RALFL32 PE=3 SV=1
Potra2n14c26369	1.62951	Upregulated	3	0.434	0.111	4.77862e-24	AT3G49780	phytosulfokine 4 precursor|ATPSK3 (FORMER SYMBOL),ATPSK4,PSK4	sp|Q9SZG4|PSK4_ARATH Putative phytosulfokines 4 OS=Arabidopsis thaliana OX=3702 GN=PSK4 PE=3 SV=1
Potra2n1c943	1.63644	Upregulated	3	0.133	0.025	2.28772e-05	AT4G22990	Major Facilitator Superfamily with SPX (SYG1/Pho81/XPR1) domain-containing protein	sp|O74902|YCS2_SCHPO Uncharacterized MFS-type transporter C613.02 OS=Schizosaccharomyces pombe (strain 972 / ATCC 24843) OX=284812 GN=SPCC613.02 PE=3 SV=1
Potra2n2c4727	1.64491	Upregulated	3	0.118	0.028	0.00165139	AT4G01660	ABC transporter 1|ABC1,ATABC1,ATATH10	sp|Q145N7|UBIB_PARXL Probable protein kinase UbiB OS=Paraburkholderia xenovorans (strain LB400) OX=266265 GN=ubiB PE=3 SV=1
Potra2n10c22118	1.6469	Upregulated	3	0.52	0.136	1.65496e-31	AT1G10370	Glutathione S-transferase family protein|ATGSTU17,ERD9,GST30,GST30B	sp|Q9VHD3|MAAI1_DROME Probable maleylacetoacetate isomerase 1 OS=Drosophila melanogaster OX=7227 GN=GstZ1 PE=1 SV=1
Potra2n5c10922	1.66921	Upregulated	3	0.123	0.023	6.41582e-05	AT3G63380	ATPase E1-E2 type family protein / haloacid dehalogenase-like hydrolase family protein	sp|Q09891|ATCX_SCHPO Putative phospholipid-transporting ATPase C24B11.12c OS=Schizosaccharomyces pombe (strain 972 / ATCC 24843) OX=284812 GN=SPAC24B11.12c PE=3 SV=1
Potra2n15c27988	1.67204	Upregulated	3	0.431	0.104	1.38054e-25	AT5G23760	Copper transport protein family	sp|O03982|HIP39_ARATH Heavy metal-associated isoprenylated plant protein 39 OS=Arabidopsis thaliana OX=3702 GN=HIPP39 PE=2 SV=1
Potra2n5c12663	1.68896	Upregulated	3	0.121	0.028	0.000607484	AT3G06720	importin alpha isoform 1|AIMP ALPHA,AT-IMP,ATKAP ALPHA,IMPA-1,IMPA1	sp|A2AU72|ARMC3_MOUSE Armadillo repeat-containing protein 3 OS=Mus musculus OX=10090 GN=Armc3 PE=1 SV=1
Potra2n6c14777	1.71352	Upregulated	3	0.496	0.134	1.29244e-29	AT2G31050	Cupredoxin superfamily protein	sp|Q5JNJ5|ENL1_ORYSJ Early nodulin-like protein 1 OS=Oryza sativa subsp. japonica OX=39947 GN=ENODL1 PE=1 SV=1
Potra2n1c796	1.74707	Upregulated	3	0.233	0.046	2.15675e-12	AT5G41670	6-phosphogluconate dehydrogenase family protein	sp|Q55702|Y229_SYNY3 Uncharacterized oxidoreductase slr0229 OS=Synechocystis sp. (strain PCC 6803 / Kazusa) OX=1111708 GN=slr0229 PE=3 SV=1
Potra2n700s36526	1.75425	Upregulated	3	0.215	0.041	3.30444e-11	AT5G40850	urophorphyrin methylase 1	sp|P21639|COBI_SINSX Precorrin-2 C(20)-methyltransferase OS=Sinorhizobium sp. OX=42445 GN=cobI PE=1 SV=2
Potra2n9c19486	1.80384	Upregulated	3	0.112	0.021	0.000380837	AT3G52140	tetratricopeptide repeat (TPR)-containing protein	sp|Q7Z494|NPHP3_HUMAN Nephrocystin-3 OS=Homo sapiens OX=9606 GN=NPHP3 PE=1 SV=1
Potra2n1c1198	1.87916	Upregulated	3	0.117	0.023	0.000259499	AT5G46840	RNA-binding (RRM/RBD/RNP motifs) family protein	sp|Q5BDC8|NOP12_EMENI Nucleolar protein 12 OS=Emericella nidulans (strain FGSC A4 / ATCC 38163 / CBS 112.46 / NRRL 194 / M139) OX=227321 GN=nop12 PE=3 SV=1
Potra2n600s36104	1.94995	Upregulated	3	0.152	0.028	4.64008e-07
Potra2n15c28993	1.95486	Upregulated	3	0.142	0.023	5.88633e-07	AT5G24090	chitinase A|ATCHIA,CHIA	sp|D4AT07|CHI1_ARTBC Probable endochitinase ARB_07371 OS=Arthroderma benhamiae (strain ATCC MYA-4681 / CBS 112371) OX=663331 GN=ARB_07371 PE=3 SV=1
Potra2n13c25744	1.96967	Upregulated	3	0.129	0.023	1.30193e-05
Potra2n8c18092	1.97094	Upregulated	3	0.39	0.069	1.19447e-27	AT3G22890	ATP sulfurylase 1|APS1	sp|Q54506|SAT_RIFPS Sulfate adenylyltransferase OS=Riftia pachyptila sulfur-oxidizing endosymbiont OX=35843 GN=sat PE=1 SV=1
Potra2n6c14477	2.00073	Upregulated	3	0.151	0.025	2.46344e-07	AT2G38120	Transmembrane amino acid transporter family protein	sp|F4HW02|GAT1_ARATH GABA transporter 1 OS=Arabidopsis thaliana OX=3702 GN=GAT1 PE=1 SV=1
Potra2n6c14878	2.04884	Upregulated	3	0.227	0.044	2.48805e-12	AT5G06860	polygalacturonase inhibiting protein 1|ATPGIP1,PGIP1	sp|Q9XIB6|PLRX2_ARATH Pollen-specific leucine-rich repeat extensin-like protein 2 OS=Arabidopsis thaliana OX=3702 GN=PEX2 PE=1 SV=1
Potra2n14c27241	2.21571	Upregulated	3	0.148	0.021	4.99395e-08	AT4G01700	Chitinase family protein	sp|Q06015|CHI3_ARAHY Endochitinase 3 (Fragment) OS=Arachis hypogaea OX=3818 PE=2 SV=1
Potra2n2c6137	2.24147	Upregulated	3	0.262	0.041	6.64934e-17	AT1G19600	pfkB-like carbohydrate kinase family protein	sp|Q93Z01|MIK_ARATH Inositol 3-kinase OS=Arabidopsis thaliana OX=3702 GN=At5g58730 PE=2 SV=1
Potra2n5c12621	2.34643	Upregulated	3	0.992	0.454	1.00906e-172	AT5G27760	Hypoxia-responsive family protein
Potra2n5c12213	2.44362	Upregulated	3	0.101	0.014	0.000167994	AT2G22420	Peroxidase superfamily protein	sp|Q0JEQ2|APX3_ORYSJ Probable L-ascorbate peroxidase 3, peroxisomal OS=Oryza sativa subsp. japonica OX=39947 GN=APX3 PE=2 SV=1
Potra2n15c28059	2.46582	Upregulated	3	0.162	0.018	4.25777e-10	AT4G23030	MATE efflux family protein	sp|Q88CB9|NORM_PSEPK Probable multidrug resistance protein NorM OS=Pseudomonas putida (strain ATCC 47054 / DSM 6125 / NCIMB 11950 / KT2440) OX=160488 GN=norM PE=3 SV=1
Potra2n1c3259	2.48152	Upregulated	3	0.677	0.129	8.64759e-69	AT4G05390	root FNR 1|ATRFNR1,RFNR1	sp|Q6NRG5|NDOR1_XENLA NADPH-dependent diflavin oxidoreductase 1 OS=Xenopus laevis OX=8355 GN=ndor1 PE=2 SV=1
Potra2n2c4957	2.53467	Upregulated	3	0.43	0.06	6.54703e-37	AT5G41340	ubiquitin conjugating enzyme 4|ATUBC4,UBC4	sp|O00102|UBC7_SCHPO Ubiquitin-conjugating enzyme E2-18 kDa OS=Schizosaccharomyces pombe (strain 972 / ATCC 24843) OX=284812 GN=ubc7 PE=1 SV=2
Potra2n3c7270	2.59009	Upregulated	3	0.438	0.053	1.33085e-39	AT5G41670	6-phosphogluconate dehydrogenase family protein	sp|Q55702|Y229_SYNY3 Uncharacterized oxidoreductase slr0229 OS=Synechocystis sp. (strain PCC 6803 / Kazusa) OX=1111708 GN=slr0229 PE=3 SV=1
Potra2n4c9589	2.68579	Upregulated	3	0.105	0.012	2.29008e-05	AT4G39730	Lipase/lipooxygenase, PLAT/LH2 family protein	sp|Q2V2V3|PLAT3_ARATH PLAT domain-containing protein 3 OS=Arabidopsis thaliana OX=3702 GN=PLAT3 PE=4 SV=1
Potra2n13c25312	2.86228	Upregulated	3	0.159	0.018	4.7016e-10
Potra2n1c494	2.87852	Upregulated	3	0.474	0.055	9.46711e-47	AT5G13110	glucose-6-phosphate dehydrogenase 2|G6PD2	sp|Q24625|G6PD_DROSI Glucose-6-phosphate 1-dehydrogenase (Fragment) OS=Drosophila simulans OX=7240 GN=Zw PE=2 SV=1
Potra2n14c27006	3.06623	Upregulated	3	0.938	0.182	3.27284e-154	AT3G61440	cysteine synthase C1|ARATH;BSAS3;1,ATCYSC1,CYSC1	sp|Q2YY67|TDCB_STAAB L-threonine dehydratase catabolic TdcB OS=Staphylococcus aureus (strain bovine RF122 / ET3-1) OX=273036 GN=tdcB PE=3 SV=2
Potra2n4c10189	3.33042	Upregulated	3	0.878	0.127	5.42759e-138	AT2G27510	ferredoxin 3|ATFD3,FD3	sp|P23101|XYLZ_PSEPU Toluate 1,2-dioxygenase electron transfer component OS=Pseudomonas putida OX=303 GN=xylZ PE=3 SV=1
Potra2n6c14450	3.43838	Upregulated	3	0.137	0.009	1.84127e-09	AT5G05600	2-oxoglutarate (2OG) and Fe(II)-dependent oxygenase superfamily protein	sp|A0A4P8GG75|EUPC_PHOSX 2-oxoglutarate-dependent dioxygenase eupC OS=Phoma sp. OX=1707701 GN=eupC PE=1 SV=1
Potra2n9c18689	3.59438	Upregulated	3	0.928	0.131	7.1938e-162	AT2G27510	ferredoxin 3|ATFD3,FD3	sp|P23101|XYLZ_PSEPU Toluate 1,2-dioxygenase electron transfer component OS=Pseudomonas putida OX=303 GN=xylZ PE=3 SV=1
Potra2n5c11357	3.64454	Upregulated	3	0.101	0.005	2.04209e-06	AT1G22170	Phosphoglycerate mutase family protein	sp|F4KI56|SERCL_ARATH Metal-independent phosphoserine phosphatase OS=Arabidopsis thaliana OX=3702 GN=IPSP PE=1 SV=1
Potra2n9c19145	4.95018	Upregulated	3	0.616	0.018	4.59242e-88	AT2G16070	plastid division2|PDV2	sp|Q9FK13|PDV1_ARATH Plastid division protein PDV1 OS=Arabidopsis thaliana OX=3702 GN=PDV1 PE=1 SV=1
Potra2n9c19175	7.62552	Upregulated	3	0.101	0	1.49875e-07
Potra2n12c24699	1.12658	Upregulated	4	0.16	0.056	8.02586e-08	AT5G45110	NPR1-like protein 3	sp|Q25338|LITD_LATTR Delta-latroinsectotoxin-Lt1a OS=Latrodectus tredecimguttatus OX=6925 PE=1 SV=1	ABTB
Potra2n9c18829	1.09858	Upregulated	4	0.265	0.1	1.16937e-13	AT4G25490	C-repeat/DRE binding factor 1|ATCBF1,CBF1,DREB1B	sp|Q9M644|LEP_ARATH Ethylene-responsive transcription factor LEP OS=Arabidopsis thaliana OX=3702 GN=LEP PE=2 SV=1	AP2-EREBP
Potra2n1c766	1.13944	Upregulated	4	0.153	0.058	2.32667e-06	AT1G64380	Integrase-type DNA-binding superfamily protein	sp|Q9M9B2|EF117_ARATH Ethylene-responsive transcription factor ERF117 OS=Arabidopsis thaliana OX=3702 GN=ERF117 PE=2 SV=1	AP2-EREBP
Potra2n2c4582	1.14408	Upregulated	4	0.545	0.253	2.52164e-28	AT3G16770	ethylene-responsive element binding protein|ATEBP,EBP,ERF72,RAP2.3	sp|Q9ZWM9|RAV1_ARATH AP2/ERF and B3 domain-containing transcription factor RAV1 OS=Arabidopsis thaliana OX=3702 GN=RAV1 PE=1 SV=1	AP2-EREBP
Potra2n7c16270	1.20989	Upregulated	4	0.354	0.137	5.97018e-20				AP2-EREBP
Potra2n6c14084	1.21311	Upregulated	4	0.114	0.041	0.00016914	AT5G21960	Integrase-type DNA-binding superfamily protein	sp|Q9AWS0|Y1410_ORYSJ AP2/ERF and B3 domain-containing protein Os01g0141000 OS=Oryza sativa subsp. japonica OX=39947 GN=Os01g0141000 PE=2 SV=1	AP2-EREBP
Potra2n13c25901	1.27871	Upregulated	4	0.109	0.038	0.000160374	AT3G23240	ethylene response factor 1|ATERF1,ERF1	sp|Q9FGC9|EF121_ARATH Putative ethylene-responsive transcription factor ERF121 OS=Arabidopsis thaliana OX=3702 GN=ERF121 PE=3 SV=1	AP2-EREBP
Potra2n13c25445	1.28156	Upregulated	4	0.591	0.249	2.52912e-37	AT1G71520	Integrase-type DNA-binding superfamily protein	sp|O49515|ERF91_ARATH Ethylene-responsive transcription factor ERF091 OS=Arabidopsis thaliana OX=3702 GN=ERF091 PE=1 SV=1	AP2-EREBP
Potra2n5c12062	1.6248	Upregulated	4	0.848	0.398	4.63545e-87	AT5G64750	Integrase-type DNA-binding superfamily protein|ABR1	sp|Q84TB5|AP22_ORYSJ APETALA2-like protein 2 OS=Oryza sativa subsp. japonica OX=39947 GN=AP2-2 PE=1 SV=1	AP2-EREBP
Potra2n5c11113	2.05744	Upregulated	4	0.28	0.058	2.25093e-33	AT5G50080	ethylene response factor 110|ERF110	sp|Q2TQ34|AP21_ORYSJ APETALA2-like protein 1 OS=Oryza sativa subsp. japonica OX=39947 GN=AP2-1 PE=1 SV=1	AP2-EREBP
Potra2n15c29002	2.54661	Upregulated	4	0.104	0.014	1.27942e-13	AT4G27950	cytokinin response factor 4|CRF4	sp|Q8H443|AP23_ORYSJ APETALA2-like protein 3 OS=Oryza sativa subsp. japonica OX=39947 GN=AP2-3 PE=1 SV=1	AP2-EREBP
Potra2n4c9349	1.22577	Upregulated	4	0.114	0.036	8.38068e-06	AT3G02550	LOB domain-containing protein 41|LBD41	sp|Q9FKZ3|LBD36_ARATH LOB domain-containing protein 36 OS=Arabidopsis thaliana OX=3702 GN=LBD36 PE=2 SV=1	AS2-LOB
Potra2n10c20471	1.53515	Upregulated	4	0.12	0.033	2.37602e-08	AT1G07900	LOB domain-containing protein 1|LBD1	sp|Q9FN11|LBD37_ARATH LOB domain-containing protein 37 OS=Arabidopsis thaliana OX=3702 GN=LBD37 PE=2 SV=1	AS2-LOB
Potra2n9c19330	2.0613	Upregulated	4	0.237	0.048	7.10095e-28	AT3G49940	LOB domain-containing protein 38|LBD38	sp|Q9CA30|LBD42_ARATH LOB domain-containing protein 42 OS=Arabidopsis thaliana OX=3702 GN=LBD42 PE=2 SV=1	AS2-LOB
Potra2n18c32065	1.03947	Upregulated	4	0.105	0.04	0.00428667	AT5G57150	basic helix-loop-helix (bHLH) DNA-binding superfamily protein	sp|Q8S3F1|BH020_ARATH Transcription factor NAI1 OS=Arabidopsis thaliana OX=3702 GN=NAI1 PE=2 SV=1	bHLH
Potra2n6c13712	1.0714	Upregulated	4	0.247	0.102	1.47036e-10	AT2G24260	LJRHL1-like 1|LRL1	sp|Q9FE22|HFR1_ARATH Transcription factor HFR1 OS=Arabidopsis thaliana OX=3702 GN=HFR1 PE=1 SV=1	bHLH
Potra2n5c10860	1.17057	Upregulated	4	0.124	0.044	2.11004e-05	AT2G31280	transcription factor bHLH155-like protein|CPUORF7	sp|Q9ZPY8|AIB_ARATH Transcription factor ABA-INDUCIBLE bHLH-TYPE OS=Arabidopsis thaliana OX=3702 GN=AIB PE=2 SV=2	bHLH
Potra2n6c14701	1.20456	Upregulated	4	0.88	0.545	5.21003e-64	AT5G57150	basic helix-loop-helix (bHLH) DNA-binding superfamily protein	sp|Q8S3F1|BH020_ARATH Transcription factor NAI1 OS=Arabidopsis thaliana OX=3702 GN=NAI1 PE=2 SV=1	bHLH
Potra2n18c32068	1.27053	Upregulated	4	0.338	0.12	1.27983e-21	AT5G57150	basic helix-loop-helix (bHLH) DNA-binding superfamily protein	sp|A0A3Q7HES4|MTB2_SOLLC Transcription factor MTB2 OS=Solanum lycopersicum OX=4081 GN=MTB2 PE=2 SV=1	bHLH
Potra2n18c32296	1.31124	Upregulated	4	0.185	0.058	7.99157e-12	AT2G24260	LJRHL1-like 1|LRL1	sp|Q9S7Y1|BH030_ARATH Transcription factor bHLH30 OS=Arabidopsis thaliana OX=3702 GN=BHLH30 PE=1 SV=1	bHLH
Potra2n13c25173	1.40914	Upregulated	4	0.132	0.04	7.24512e-08	AT4G20970	basic helix-loop-helix (bHLH) DNA-binding superfamily protein	sp|F4I4E1|BH167_ARATH Transcription factor bHLH167 OS=Arabidopsis thaliana OX=3702 GN=BHLH167 PE=2 SV=1	bHLH
Potra2n4c8651	1.57424	Upregulated	4	0.18	0.051	1.59439e-13	AT1G61660	basic helix-loop-helix (bHLH) DNA-binding superfamily protein	sp|Q2QQ32|BH133_ORYSJ Transcription factor BHLH133 OS=Oryza sativa subsp. japonica OX=39947 GN=BHLH133 PE=2 SV=1	bHLH
Potra2n9c19481	3.10705	Upregulated	4	0.325	0.029	4.01005e-63	AT2G42280	basic helix-loop-helix (bHLH) DNA-binding superfamily protein	sp|Q84WK0|BH085_ARATH Transcription factor bHLH85 OS=Arabidopsis thaliana OX=3702 GN=BHLH85 PE=2 SV=1	bHLH
Potra2n14c27078	1.29759	Upregulated	4	0.336	0.113	4.92003e-24	AT3G61600	POZ/BTB containin G-protein 1|ATPOB1,POB1	sp|Q80TF4|KLH13_MOUSE Kelch-like protein 13 OS=Mus musculus OX=10090 GN=Klhl13 PE=2 SV=3	BTB-POZ
Potra2n8c16778	-1.51055	Downregulated	4	0.087	0.186	0.000175394	AT5G04840	bZIP protein	sp|Q5QNI5|BZP02_ORYSJ Basic leucine zipper 2 OS=Oryza sativa subsp. japonica OX=39947 GN=BZIP02 PE=2 SV=1	bZIP
Potra2n1c1995	-1.13689	Downregulated	4	0.364	0.494	2.55575e-11	AT3G60080	RING/U-box superfamily protein	sp|Q4R6Y5|ZNRF4_MACFA E3 ubiquitin-protein ligase ZNRF4 OS=Macaca fascicularis OX=9541 GN=ZNRF4 PE=2 SV=1	C2H2
Potra2n11c23199	-1.04528	Downregulated	4	0.547	0.709	5.74045e-23	AT4G18780	cellulose synthase(cesa) family protein|ATCESA8,CESA8,IRX1,LEW2	sp|P58931|BCSA_PSEFS Cellulose synthase catalytic subunit [UDP-forming] OS=Pseudomonas fluorescens (strain SBW25) OX=216595 GN=bcsA PE=3 SV=2	C2H2
Potra2n8c18601	1.05412	Upregulated	4	0.138	0.052	2.23624e-05	AT3G16720	TOXICOS EN LEVADURA 2|ATL2,TL2	sp|Q66J97|R111C_XENLA E3 ubiquitin-protein ligase arkadia-C OS=Xenopus laevis OX=8355 GN=rnf111-c PE=2 SV=1	C2H2
Potra2n5c12524	1.06173	Upregulated	4	0.133	0.06	0.00447981	AT3G05200	RING/U-box superfamily protein|ATL6	sp|Q9Y6U7|RN215_HUMAN RING finger protein 215 OS=Homo sapiens OX=9606 GN=RNF215 PE=4 SV=2	C2H2
Potra2n16c29776	1.07802	Upregulated	4	0.206	0.08	2.873e-09	AT3G58040	seven in absentia of Arabidopsis 2|SINAT2	sp|Q2TAD9|CYR1B_XENLA Cysteine and histidine-rich protein 1-B OS=Xenopus laevis OX=8355 GN=cyhr1-b PE=2 SV=2	C2H2
Potra2n3c7384	1.0789	Upregulated	4	0.173	0.075	8.76584e-06	AT4G11680	Zinc finger, C3HC4 type (RING finger) family protein	sp|Q8GUU2|RIE1_ARATH E3 ubiquitin protein ligase RIE1 OS=Arabidopsis thaliana OX=3702 GN=RIE1 PE=2 SV=1	C2H2
Potra2n1c2646	1.1854	Upregulated	4	0.157	0.051	9.43838e-09	AT4G34100	RING/U-box superfamily protein	sp|Q5XIE5|MARH3_RAT E3 ubiquitin-protein ligase MARCHF3 OS=Rattus norvegicus OX=10116 GN=Marchf3 PE=1 SV=1	C2H2
Potra2n3c7156	1.19412	Upregulated	4	0.104	0.04	0.00317077	AT5G48655	RING/U-box superfamily protein	sp|Q9R1A8|COP1_MOUSE E3 ubiquitin-protein ligase COP1 OS=Mus musculus OX=10090 GN=Cop1 PE=1 SV=2	C2H2
Potra2n9c19823	1.21198	Upregulated	4	0.697	0.321	3.17794e-44	AT3G46620	zinc finger (C3HC4-type RING finger) family protein	sp|O64762|ATL38_ARATH RING-H2 finger protein ATL38 OS=Arabidopsis thaliana OX=3702 GN=ATL38 PE=2 SV=1	C2H2
Potra2n3c7757	1.26274	Upregulated	4	0.138	0.041	1.30264e-08	AT1G32740	SBP (S-ribonuclease binding protein) family protein	sp|F4IDI6|BRG2_ARATH Probable BOI-related E3 ubiquitin-protein ligase 2 OS=Arabidopsis thaliana OX=3702 GN=BRG2 PE=1 SV=1	C2H2
Potra2n11c23381	1.28591	Upregulated	4	0.244	0.09	3.55768e-13	AT1G61140	SNF2 domain-containing protein / helicase domain-containing protein / zinc finger protein-like protein|EDA16	sp|A4PBL4|RAD54_ORYSJ DNA repair and recombination protein RAD54 OS=Oryza sativa subsp. japonica OX=39947 GN=RAD54 PE=1 SV=1	C2H2
Potra2n13c26069	1.39471	Upregulated	4	0.18	0.054	3.64192e-12	AT3G05200	RING/U-box superfamily protein|ATL6	sp|P38239|YBR2_YEAST Uncharacterized RING finger protein YBR062C OS=Saccharomyces cerevisiae (strain ATCC 204508 / S288c) OX=559292 GN=YBR062C PE=1 SV=2	C2H2
Potra2n8c17134	1.44154	Upregulated	4	0.193	0.06	3.63334e-13	AT5G59550	zinc finger (C3HC4-type RING finger) family protein	sp|P0DPR2|RNF43_XENTR E3 ubiquitin-protein ligase RNF43 OS=Xenopus tropicalis OX=8364 GN=rnf43 PE=2 SV=1	C2H2
Potra2n9c18863	1.47663	Upregulated	4	0.269	0.085	2.58129e-19	AT1G08290	WIP domain protein 3|WIP3	sp|Q80W31|ZN569_MOUSE Zinc finger protein 569 OS=Mus musculus OX=10090 GN=Znf569 PE=2 SV=2	C2H2
Potra2n4c9297	-1.00408	Downregulated	4	0.379	0.497	2.58079e-09	AT1G66810	Zinc finger C-x8-C-x5-C-x3-H type family protein	sp|Q09436|MEX6_CAEEL Zinc finger protein mex-6 OS=Caenorhabditis elegans OX=6239 GN=mex-6 PE=1 SV=3	C3H
Potra2n1c2196	1.23162	Upregulated	4	0.18	0.061	5.7534e-10	AT5G58620	zinc finger (CCCH-type) family protein	sp|Q94JI5|C3H10_ORYSJ Zinc finger CCCH domain-containing protein 10 OS=Oryza sativa subsp. japonica OX=39947 GN=Os01g0738400 PE=2 SV=1	C3H
Potra2n548s35915	1.1785	Upregulated	4	0.85	0.482	8.50707e-56	AT5G48150	GRAS family transcription factor	sp|Q2V2T9|SCL16_ARATH Putative scarecrow-like protein 16 OS=Arabidopsis thaliana OX=3702 GN=SCL16 PE=5 SV=1	GRAS
Potra2n5c11185	1.5257	Upregulated	4	0.244	0.08	6.52961e-17	AT1G21450	SCARECROW-like 1|SCL1	sp|O23210|SCL15_ARATH Scarecrow-like protein 15 OS=Arabidopsis thaliana OX=3702 GN=SCL15 PE=1 SV=3	GRAS
Potra2n17c30701	1.56577	Upregulated	4	0.171	0.048	6.09089e-13	AT5G52510	SCARECROW-like 8|SCL8	sp|Q2V2T9|SCL16_ARATH Putative scarecrow-like protein 16 OS=Arabidopsis thaliana OX=3702 GN=SCL16 PE=5 SV=1	GRAS
Potra2n1c2095	1.58566	Upregulated	4	0.176	0.046	2.50203e-14	AT1G07530	SCARECROW-like 14|ATGRAS2,GRAS2,SCL14	sp|Q7XJM8|SCL27_ARATH Scarecrow-like protein 27 OS=Arabidopsis thaliana OX=3702 GN=SCL27 PE=2 SV=1	GRAS
Potra2n9c19446	-1.6478	Downregulated	4	0.096	0.224	6.53348e-08	AT5G12840	nuclear factor Y, subunit A1|ATHAP2A,EMB2220,HAP2A,NF-YA1	sp|P06774|HAP2_YEAST Transcriptional activator HAP2 OS=Saccharomyces cerevisiae (strain ATCC 204508 / S288c) OX=559292 GN=HAP2 PE=1 SV=1	Hap2/NF-YA
Potra2n9c19886	-1.00253	Downregulated	4	0.334	0.492	2.14925e-11	AT2G28720	Histone superfamily protein	sp|Q54BC2|H2BV1_DICDI Histone H2B.v1 OS=Dictyostelium discoideum OX=44689 GN=H2Bv1 PE=3 SV=1	Hap3/NF-YB
Potra2n7c16575	1.24685	Upregulated	4	0.333	0.125	1.25475e-19	AT4G37790	Homeobox-leucine zipper protein family|HAT22	sp|Q6H6S3|HOX24_ORYSJ Homeobox-leucine zipper protein HOX24 OS=Oryza sativa subsp. japonica OX=39947 GN=HOX24 PE=2 SV=1	Homobox-WOX
Potra2n6c13552	1.2967	Upregulated	4	0.214	0.081	6.2405e-11	AT2G35940	BEL1-like homeodomain 1|BLH1,EDA29	sp|P48001|KNAT4_ARATH Homeobox protein knotted-1-like 4 OS=Arabidopsis thaliana OX=3702 GN=KNAT4 PE=1 SV=3	Homobox-WOX
Potra2n10c21453	1.38853	Upregulated	4	0.129	0.041	4.9978e-07	AT2G01430	homeobox-leucine zipper protein 17|ATHB-17,ATHB17,HB17	sp|Q6H6S3|HOX24_ORYSJ Homeobox-leucine zipper protein HOX24 OS=Oryza sativa subsp. japonica OX=39947 GN=HOX24 PE=2 SV=1	Homobox-WOX
Potra2n18c32866	1.69578	Upregulated	4	0.112	0.029	3.75736e-08	AT4G32880	homeobox-leucine zipper protein ATHB-8|ATHB-8,ATHB8,HB-8	sp|Q336P2|ROC3_ORYSJ Homeobox-leucine zipper protein ROC3 OS=Oryza sativa subsp. japonica OX=39947 GN=ROC3 PE=2 SV=1	Homobox-WOX
Potra2n7c16268	1.61722	Upregulated	4	0.437	0.137	4.70545e-38	AT4G36990	heat shock factor 4|AT-HSFB1,ATHSF4,HSF4,HSFB1	sp|Q5AK51|SFL2_CANAL Transcription factor SFL2 OS=Candida albicans (strain SC5314 / ATCC MYA-2876) OX=237561 GN=SFL2 PE=1 SV=2	HSF-type-DNA-bin
Potra2n3c7648	1.22237	Upregulated	4	0.422	0.162	4.22092e-26	AT5G46910	Transcription factor jumonji (jmj) family protein / zinc finger (C5HC2 type) family protein	sp|Q03214|ECM5_YEAST Protein ECM5 OS=Saccharomyces cerevisiae (strain ATCC 204508 / S288c) OX=559292 GN=ECM5 PE=1 SV=1	JmjC
Potra2n9c19352	-1.10062	Downregulated	4	0.741	0.854	1.0576e-42	AT1G10200	GATA type zinc finger transcription factor family protein	sp|D3ZBP4|MICA1_RAT [F-actin]-monooxygenase MICAL1 OS=Rattus norvegicus OX=10116 GN=Mical1 PE=1 SV=1	LIM
Potra2n1c2551	-1.09653	Downregulated	4	0.366	0.478	1.28847e-09	AT1G10200	GATA type zinc finger transcription factor family protein	sp|D3ZQL6|MILK1_RAT MICAL-like protein 1 OS=Rattus norvegicus OX=10116 GN=Micall1 PE=1 SV=1	LIM
Potra2n9c19208	1.32524	Upregulated	4	0.756	0.361	6.35352e-55	AT3G48690	alpha/beta-Hydrolases superfamily protein|ATCXE12,CXE12	sp|P37967|PNBA_BACSU Para-nitrobenzyl esterase OS=Bacillus subtilis (strain 168) OX=224308 GN=pnbA PE=1 SV=2	LIM
Potra2n6c12839	1.18161	Upregulated	4	0.105	0.041	0.00478836	AT4G31160	DDB1-CUL4 associated factor 1|DCAF1	sp|Q21106|DCAF1_CAEEL DDB1- and CUL4-associated factor homolog 1 OS=Caenorhabditis elegans OX=6239 GN=dcaf-1 PE=3 SV=5	LisH
Potra2n6c14448	1.47109	Upregulated	4	0.427	0.148	5.46451e-32	AT2G38250	Homeodomain-like superfamily protein	sp|P17040|ZSC20_HUMAN Zinc finger and SCAN domain-containing protein 20 OS=Homo sapiens OX=9606 GN=ZSCAN20 PE=1 SV=3	MYB
Potra2n16c30327	1.61907	Upregulated	4	0.557	0.181	1.285e-51	AT2G38250	Homeodomain-like superfamily protein	sp|Q9LZS0|PTL_ARATH Trihelix transcription factor PTL OS=Arabidopsis thaliana OX=3702 GN=PTL PE=1 SV=1	MYB
Potra2n1c829	-1.6527	Downregulated	4	0.072	0.162	0.000652222	AT1G63910	myb domain protein 103|AtMYB103,MYB103	sp|Q6C8F5|CEF1_YARLI Pre-mRNA-splicing factor CEF1 OS=Yarrowia lipolytica (strain CLIB 122 / E 150) OX=284591 GN=CEF1 PE=3 SV=1	MYB-HB-like
Potra2n10c20715	-1.40107	Downregulated	4	0.082	0.17	0.00360352	AT2G38090	Duplicated homeodomain-like superfamily protein	sp|Q6R0H0|RVE3_ARATH Protein REVEILLE 3 OS=Arabidopsis thaliana OX=3702 GN=RVE3 PE=2 SV=1	MYB-HB-like
Potra2n9c19651	-1.1327	Downregulated	4	0.301	0.429	1.16992e-08	AT3G08500	myb domain protein 83|AtMYB83,MYB83	sp|C8VBH3|CEF1_EMENI Pre-mRNA-splicing factor cef1 OS=Emericella nidulans (strain FGSC A4 / ATCC 38163 / CBS 112.46 / NRRL 194 / M139) OX=227321 GN=cef1 PE=3 SV=1	MYB-HB-like
Potra2n15c28607	1.05082	Upregulated	4	0.323	0.143	1.02463e-13	AT1G19000	Homeodomain-like superfamily protein	sp|Q54HX6|MYBI_DICDI Myb-like protein I OS=Dictyostelium discoideum OX=44689 GN=mybI PE=3 SV=1	MYB-HB-like
Potra2n203s34956	1.3292	Upregulated	4	0.634	0.248	1.1126e-46	AT4G37180	Homeodomain-like superfamily protein	sp|Q9FJV5|KAN4_ARATH Probable transcription factor KAN4 OS=Arabidopsis thaliana OX=3702 GN=KAN4 PE=1 SV=1	MYB-HB-like
Potra2n3c6990	1.08271	Upregulated	4	0.303	0.115	1.68767e-16	AT5G13180	NAC domain containing protein 83|ANAC083,NAC083,VNI2	sp|O49459|NAC73_ARATH NAC domain-containing protein 73 OS=Arabidopsis thaliana OX=3702 GN=NAC073 PE=2 SV=1	NAM
Potra2n5c11119	1.31916	Upregulated	4	0.376	0.146	2.49703e-23	AT4G39350	cellulose synthase(cesa) A2|ATCESA2,ATH-A,CESA2	sp|Q9U720|DCSA_DICDI Cellulose synthase catalytic subunit A [UDP-forming] OS=Dictyostelium discoideum OX=44689 GN=dcsA PE=1 SV=1	PHD
Potra2n1c2289	1.59849	Upregulated	4	0.119	0.029	2.53795e-09	AT3G63500	fibronectin type III domain protein (DUF1423)	sp|Q9S736|OBE1_ARATH Protein OBERON 1 OS=Arabidopsis thaliana OX=3702 GN=OBE1 PE=1 SV=1	PHD
Potra2n10c21796	1.03234	Upregulated	4	0.112	0.044	0.00197451	AT3G23150	Signal transduction histidine kinase, hybrid-type, ethylene sensor	sp|G0SB31|SKN7_CHATD Transcription factor SKN7 OS=Chaetomium thermophilum (strain DSM 1495 / CBS 144.50 / IMI 039719) OX=759272 GN=SKN7 PE=1 SV=1	RR-A-type
Potra2n7c16466	1.32786	Upregulated	4	0.1	0.028	4.07008e-06	AT4G18905	Transducin/WD40 repeat-like superfamily protein	sp|Q5XI13|GRWD1_RAT Glutamate-rich WD repeat-containing protein 1 OS=Rattus norvegicus OX=10116 GN=Grwd1 PE=2 SV=1	WD40-like
Potra2n8c17556	1.06393	Upregulated	4	0.32	0.149	6.0394e-12	AT5G49520	WRKY DNA-binding protein 48|ATWRKY48,WRKY48	sp|K4BIZ9|WRK70_SOLLC WRKY DNA-binding transcription factor 70 OS=Solanum lycopersicum OX=4081 GN=WRKY70 PE=2 SV=1	WRKY
Potra2n1c366	1.0722	Upregulated	4	0.621	0.326	3.88716e-28	AT1G80840	WRKY DNA-binding protein 40|ATWRKY40,WRKY40	sp|Q93WV7|WRK67_ARATH Probable WRKY transcription factor 67 OS=Arabidopsis thaliana OX=3702 GN=WRKY67 PE=2 SV=1	WRKY
Potra2n6c14723	1.17376	Upregulated	4	0.786	0.398	7.09327e-50	AT4G31550	WRKY DNA-binding protein 11|ATWRKY11,WRKY11	sp|Q93WV7|WRK67_ARATH Probable WRKY transcription factor 67 OS=Arabidopsis thaliana OX=3702 GN=WRKY67 PE=2 SV=1	WRKY
Potra2n19c33341	1.2429	Upregulated	4	0.175	0.065	3.75382e-08	AT2G38470	WRKY DNA-binding protein 33|ATWRKY33,WRKY33	sp|Q8H0Y8|WRK41_ARATH Probable WRKY transcription factor 41 OS=Arabidopsis thaliana OX=3702 GN=WRKY41 PE=2 SV=2	WRKY
Potra2n2c4882	1.58189	Upregulated	4	0.226	0.07	8.85051e-17	AT4G11070	WRKY family transcription factor|AtWRKY41,WRKY41	sp|Q6IEK5|WRK76_ORYSI WRKY transcription factor WRKY76 OS=Oryza sativa subsp. indica OX=39946 GN=WRKY76 PE=2 SV=1	WRKY
Potra2n1c3570	1.30971	Upregulated	4	0.107	0.038	0.000272494	AT5G54470	B-box type zinc finger family protein	sp|Q9C9F4|COLX_ARATH Putative zinc finger protein At1g68190 OS=Arabidopsis thaliana OX=3702 GN=At1g68190 PE=2 SV=1	Znf-B
Potra2n5c10502	3.48281	Upregulated	4	0.166	0.012	5.90281e-32	AT1G21000	PLATZ transcription factor family protein		Znf-B
Potra2n2c5697	1.39466	Upregulated	4	0.776	0.328	4.27736e-66	AT1G77380	amino acid permease 3|AAP3,ATAAP3	sp|Q8GYS4|AVT1D_ARATH Amino acid transporter AVT1D OS=Arabidopsis thaliana OX=3702 GN=AVT1D PE=2 SV=1
Potra2n10c21889	1.2985	Upregulated	4	0.165	0.043	3.49301e-13	AT4G13510	ammonium transporter 1;1|AMT1;1,ATAMT1,ATAMT1;1	sp|Q69D47|RHBG_ORYLA Ammonium transporter Rh type B OS=Oryzias latipes OX=8090 GN=rhbg PE=2 SV=1
Potra2n6c14433	1.79941	Upregulated	4	0.591	0.192	1.88301e-60	AT2G38290	ammonium transporter 2|AMT2,AMT2;1,ATAMT2	sp|Q19KH7|RHCG_GASAC Ammonium transporter Rh type C OS=Gasterosteus aculeatus OX=69293 GN=rhcg PE=2 SV=1
Potra2n18c32565	1.72574	Upregulated	4	0.414	0.13	8.31281e-37	AT5G19550	aspartate aminotransferase 2|AAT2,ASP2	sp|Q7TSV6|AATC2_MOUSE Putative aspartate aminotransferase, cytoplasmic 2 OS=Mus musculus OX=10090 GN=Got1l1 PE=2 SV=1
Potra2n12c23912	2.46406	Upregulated	4	0.138	0.023	2.83718e-17	AT5G53460	NADH-dependent glutamate synthase 1|GLT1	sp|Q58931|TRXB_METJA Putative thioredoxin reductase OS=Methanocaldococcus jannaschii (strain ATCC 43067 / DSM 2661 / JAL-1 / JCM 10045 / NBRC 100440) OX=243232 GN=MJ1536 PE=3 SV=1
Potra2n1c2934	1.26715	Upregulated	4	0.204	0.082	3.57298e-09	AT5G40780	lysine histidine transporter 1|LHT1	sp|Q9SVG0|AVT3C_ARATH Amino acid transporter AVT3C OS=Arabidopsis thaliana OX=3702 GN=AVT3C PE=1 SV=1
Potra2n4c9696	5.98992	Upregulated	4	0.633	0.014	7.43611e-188	AT2G15620	nitrite reductase 1|ATHNIR,NIR,NIR1	sp|P21637|COBG_SINSX Precorrin-3B synthase OS=Sinorhizobium sp. OX=42445 GN=cobG PE=3 SV=2
Potra2n15c28440	5.09505	Upregulated	4	0.209	0.005	2.84147e-50	AT5G50200	nitrate transmembrane transporter|ATNRT3.1,NRT3.1,WR3	sp|Q7XK12|NAR22_ORYSJ Probable high-affinity nitrate transporter-activating protein 2.2 OS=Oryza sativa subsp. japonica OX=39947 GN=NAR2.2 PE=2 SV=1
Potra2n1c2237	2.462	Upregulated	4	0.145	0.026	3.86105e-17	AT5G04590	sulfite reductase|SIR	sp|P38500|NIR_BETPN Ferredoxin--nitrite reductase, chloroplastic OS=Betula pendula OX=3505 GN=NIR1 PE=2 SV=1
Potra2n5c11311	-2.84191	Downregulated	4	0.041	0.189	5.42293e-14	AT1G77720	putative protein kinase 1|PPK1	sp|Q54XY6|Y0019_DICDI Probable serine/threonine-protein kinase DDB_G0278521 OS=Dictyostelium discoideum OX=44689 GN=DDB_G0278521 PE=3 SV=1
Potra2n2c4329	-1.89874	Downregulated	4	0.066	0.176	1.05969e-06	AT5G16490	ROP-interactive CRIB motif-containing protein 4|RIC4	sp|Q8GYU0|RIC2_ARATH CRIB domain-containing protein RIC2 OS=Arabidopsis thaliana OX=3702 GN=RIC2 PE=1 SV=1
Potra2n11c22698	-1.80722	Downregulated	4	0.043	0.115	0.00811439	AT5G54530	serine protease, putative (Protein of unknown function, DUF538)
Potra2n6c13262	-1.78628	Downregulated	4	0.043	0.12	0.00211951	AT5G26010	Protein phosphatase 2C family protein	sp|Q8CGA0|PPM1F_MOUSE Protein phosphatase 1F OS=Mus musculus OX=10090 GN=Ppm1f PE=1 SV=1
Potra2n9c19914	-1.77231	Downregulated	4	0.11	0.259	1.15977e-10	AT2G31930	hypothetical protein
Potra2n8c18086	-1.73854	Downregulated	4	0.102	0.241	1.96895e-09	AT1G60680	NAD(P)-linked oxidoreductase superfamily protein	sp|Q6W8P9|AK1CO_HORSE Aldo-keto reductase family 1 member C23-like protein OS=Equus caballus OX=9796 GN=PGFS PE=1 SV=1
Potra2n5c11775	-1.72787	Downregulated	4	0.099	0.194	0.000323755	AT2G18050	histone H1-3|HIS1-3	sp|P54671|H1_DICDI Histone H1 OS=Dictyostelium discoideum OX=44689 GN=H1 PE=1 SV=3
Potra2n2c5124	-1.70196	Downregulated	4	0.069	0.179	4.2367e-06	AT3G60550	cyclin p3;2|CYCP3;2	sp|P20052|PHO80_YEAST PHO85 cyclin PHO80 OS=Saccharomyces cerevisiae (strain ATCC 204508 / S288c) OX=559292 GN=PHO80 PE=1 SV=3
Potra2n14c26607	-1.69331	Downregulated	4	0.077	0.172	0.000263553	AT4G31940	cytochrome P450, family 82, subfamily C, polypeptide 4|CYP82C4	sp|A0A0R8YXT5|MPAO_CLAUC Methylphloroacetophenone oxidase OS=Cladonia uncialis OX=174080 GN=MPAO PE=1 SV=1
Potra2n10c21314	-1.68962	Downregulated	4	0.171	0.379	2.56187e-18	AT1G68585	hypothetical protein
Potra2n3c6926	-1.53011	Downregulated	4	0.124	0.242	4.10121e-06	AT1G67360	Rubber elongation factor protein (REF)	sp|P15252|REF_HEVBR Rubber elongation factor protein OS=Hevea brasiliensis OX=3981 PE=1 SV=2
Potra2n3c7827	-1.51135	Downregulated	4	0.208	0.403	3.45935e-16	AT4G17370	Oxidoreductase family protein	sp|Q82NQ8|IOLG_STRAW Inositol 2-dehydrogenase OS=Streptomyces avermitilis (strain ATCC 31267 / DSM 46492 / JCM 5070 / NBRC 14893 / NCIMB 12804 / NRRL 8165 / MA-4680) OX=227882 GN=iolG PE=3 SV=1
Potra2n10c21211	-1.46336	Downregulated	4	0.16	0.329	5.28427e-12	AT1G13635	DNA glycosylase superfamily protein	sp|Q7VG78|GUAA_HELHP Probable GMP synthase [glutamine-hydrolyzing] OS=Helicobacter hepaticus (strain ATCC 51449 / 3B1) OX=235279 GN=guaA PE=3 SV=1
Potra2n2c4886	-1.45679	Downregulated	4	0.203	0.379	1.08221e-13	AT3G61660	hypothetical protein
Potra2n9c19866	-1.43935	Downregulated	4	0.138	0.263	2.14616e-06	AT5G02440	60S ribosomal protein L36
Potra2n16c29511	-1.41596	Downregulated	4	0.112	0.234	1.52393e-06	AT4G09550	AtGCP3 interacting protein 1|ATGIP1,GIP1	sp|Q2GVR6|MZT1_CHAGB Mitotic-spindle organizing protein 1 OS=Chaetomium globosum (strain ATCC 6205 / CBS 148.51 / DSM 1962 / NBRC 6347 / NRRL 1970) OX=306901 GN=CHGG_07938 PE=3 SV=1
Potra2n14c27227	-1.38594	Downregulated	4	0.255	0.418	1.2588e-12	AT3G62020	germin-like protein 10|GLP10	sp|P83004|13SB_FAGES 13S globulin basic chain OS=Fagopyrum esculentum OX=3617 PE=1 SV=1
Potra2n8c17819	-1.38083	Downregulated	4	0.105	0.195	0.00466453	AT2G01350	quinolinate phoshoribosyltransferase|QPT	sp|Q57278|MODD_HAEIN Putative pyrophosphorylase ModD OS=Haemophilus influenzae (strain ATCC 51907 / DSM 11121 / KW20 / Rd) OX=71421 GN=modD PE=3 SV=1
Potra2n2c4733	-1.37887	Downregulated	4	0.244	0.406	8.1004e-13	AT3G62020	germin-like protein 10|GLP10	sp|P09351|SR1B_PHYPO Spherulin-1B OS=Physarum polycephalum OX=5791 PE=2 SV=1
Potra2n5c11222	-1.37815	Downregulated	4	0.229	0.404	2.07282e-13	AT1G77280	kinase with adenine nucleotide alpha hydrolases-like domain-containing protein	sp|Q54FR9|Y0436_DICDI Probable serine/threonine-protein kinase DDB_G0290621 OS=Dictyostelium discoideum OX=44689 GN=DDB_G0290621 PE=3 SV=1
Potra2n16c30400	-1.37435	Downregulated	4	0.204	0.34	2.31545e-08	AT2G38320	TRICHOME BIREFRINGENCE-LIKE 34|TBL34	sp|Q93ZA5|TBL46_ARATH Putative truncated protein trichome birefringence-like 46 OS=Arabidopsis thaliana OX=3702 GN=TBL46 PE=5 SV=1
Potra2n7c16513	-1.36973	Downregulated	4	0.206	0.347	5.72937e-09	AT2G18050	histone H1-3|HIS1-3	sp|Q08864|H11_VOLCA Histone H1-I OS=Volvox carteri OX=3067 GN=H1-I PE=2 SV=3
Potra2n2c6209	-1.36718	Downregulated	4	0.3	0.514	2.75529e-21	AT1G19870	IQ-domain 32|iqd32	sp|Q8L4D8|IQD31_ARATH Protein IQ-DOMAIN 31 OS=Arabidopsis thaliana OX=3702 GN=IQD31 PE=1 SV=1
Potra2n9c19570	-1.32108	Downregulated	4	0.283	0.458	2.59695e-15	AT3G51780	BCL-2-associated athanogene 4|ATBAG4,BAG4	sp|Q0WPX7|BAG2_ARATH BAG family molecular chaperone regulator 2 OS=Arabidopsis thaliana OX=3702 GN=BAG2 PE=1 SV=1
Potra2n2c4696	-1.32063	Downregulated	4	0.825	0.916	4.14716e-57	AT4G01850	S-adenosylmethionine synthetase 2|AtSAM2,MAT2,SAM-2,SAM2	sp|P47293|METK_MYCGE S-adenosylmethionine synthase OS=Mycoplasma genitalium (strain ATCC 33530 / G-37 / NCTC 10195) OX=243273 GN=metK PE=3 SV=1
Potra2n8c18023	-1.31553	Downregulated	4	0.129	0.239	8.8073e-05
Potra2n4c9715	-1.30489	Downregulated	4	0.147	0.29	5.34137e-08
Potra2n1c3290	-1.29025	Downregulated	4	0.288	0.444	3.19594e-11	AT3G15050	IQ-domain 10|IQD10	sp|Q8LPG9|IQD14_ARATH Protein IQ-DOMAIN 14 OS=Arabidopsis thaliana OX=3702 GN=IQD14 PE=1 SV=1
Potra2n2c6244	-1.28913	Downregulated	4	0.346	0.53	1.59488e-18	AT1G20010	tubulin beta-5 chain|TUB5	sp|P86234|TBA3_MESAU Tubulin alpha-3 chain (Fragments) OS=Mesocricetus auratus OX=10036 PE=1 SV=1
Potra2n3c7017	-1.27911	Downregulated	4	0.124	0.232	0.000139607	AT1G03080	kinase interacting (KIP1-like) family protein	sp|Q4PSJ7|NET3B_ARATH Protein NETWORKED 3B OS=Arabidopsis thaliana OX=3702 GN=NET3B PE=1 SV=1
Potra2n9c19275	-1.2674	Downregulated	4	0.61	0.761	2.4787e-33	AT4G34230	cinnamyl alcohol dehydrogenase 5|ATCAD5,CAD-5,CAD5	sp|Q8H0M1|QORH_SPIOL Quinone-oxidoreductase homolog, chloroplastic OS=Spinacia oleracea OX=3562 GN=QOR PE=1 SV=1
Potra2n1c691	-1.22882	Downregulated	4	0.359	0.519	1.83709e-15	AT4G24130	DUF538 family protein (Protein of unknown function, DUF538)
Potra2n1c3615	-1.22839	Downregulated	4	0.372	0.593	1.5867e-25	AT5G54670	kinesin 3	sp|Q7XMJ2|KN10B_ORYSJ Kinesin-like protein KIN-10B OS=Oryza sativa subsp. japonica OX=39947 GN=KIN10B PE=2 SV=2
Potra2n11c22735	-1.22357	Downregulated	4	0.484	0.668	5.26606e-29	AT5G54240	membrane lipoprotein lipid attachment site-like protein, putative (DUF1223)
Potra2n1c899	-1.2231	Downregulated	4	0.458	0.58	9.03582e-15	AT5G23750	Remorin family protein	sp|Q9M2D8|Y3126_ARATH Uncharacterized protein At3g61260 OS=Arabidopsis thaliana OX=3702 GN=At3g61260 PE=1 SV=1
Potra2n14c26958	-1.2196	Downregulated	4	0.31	0.446	6.40765e-09	AT2G45790	phosphomannomutase|ATPMM,PMM	sp|O43976|PMM_BABBO Phosphomannomutase OS=Babesia bovis OX=5865 GN=PMM PE=2 SV=1
Potra2n2c6056	-1.19093	Downregulated	4	0.201	0.33	8.66118e-07	AT2G30620	winged-helix DNA-binding transcription factor family protein	sp|P54671|H1_DICDI Histone H1 OS=Dictyostelium discoideum OX=44689 GN=H1 PE=1 SV=3
Potra2n4c8486	-1.18827	Downregulated	4	0.404	0.568	1.23583e-18	AT1G11860	Glycine cleavage T-protein family	sp|Q7TSQ8|PDPR_MOUSE Pyruvate dehydrogenase phosphatase regulatory subunit, mitochondrial OS=Mus musculus OX=10090 GN=Pdpr PE=1 SV=1
Potra2n18c32134	-1.18423	Downregulated	4	0.209	0.339	1.46611e-06	AT5G20190	Tetratricopeptide repeat (TPR)-like superfamily protein
Potra2n12c24675	-1.18121	Downregulated	4	0.255	0.383	7.71961e-08	AT2G44740	cyclin p4;1|CYCP4;1	sp|P40038|PCL6_YEAST PHO85 cyclin-6 OS=Saccharomyces cerevisiae (strain ATCC 204508 / S288c) OX=559292 GN=PCL6 PE=1 SV=1
Potra2n8c17452	-1.17775	Downregulated	4	0.325	0.474	4.08354e-13	AT2G03350	DUF538 family protein (Protein of unknown function, DUF538)	sp|B4FUP5|CM2_MAIZE Chorismate mutase 2, cytosolic OS=Zea mays OX=4577 GN=CM2 PE=1 SV=1
Potra2n12c24569	-1.17217	Downregulated	4	0.247	0.376	3.92278e-07	AT5G50720	HVA22 homologue E|ATHVA22E,HVA22E	sp|Q75A56|YOP1_ASHGO Protein YOP1 OS=Ashbya gossypii (strain ATCC 10895 / CBS 109.51 / FGSC 9923 / NRRL Y-1056) OX=284811 GN=YOP1 PE=3 SV=2
Potra2n2c5902	-1.16548	Downregulated	4	0.142	0.246	0.000743684	AT1G06550	ATP-dependent caseinolytic (Clp) protease/crotonase family protein	sp|Q54SS0|ECH1_DICDI Delta(3,5)-Delta(2,4)-dienoyl-CoA isomerase, mitochondrial OS=Dictyostelium discoideum OX=44689 GN=ech1 PE=3 SV=1
Potra2n2c4222	-1.16522	Downregulated	4	0.634	0.792	1.89731e-43	AT2G32720	cytochrome B5 isoform B	sp|Q920R3|FADS1_RAT Acyl-CoA (8-3)-desaturase OS=Rattus norvegicus OX=10116 GN=Fads1 PE=1 SV=1
Potra2n8c17474	-1.16233	Downregulated	4	0.224	0.327	0.000124829	AT3G27960	Tetratricopeptide repeat (TPR)-like superfamily protein	sp|Q9NSK0|KLC4_HUMAN Kinesin light chain 4 OS=Homo sapiens OX=9606 GN=KLC4 PE=1 SV=3
Potra2n5c12784	-1.11012	Downregulated	4	0.498	0.652	9.4498e-23	AT1G09430	ATP-citrate lyase A-3|ACLA-3	sp|B6IP72|SUCC_RHOCS Succinate--CoA ligase [ADP-forming] subunit beta OS=Rhodospirillum centenum (strain ATCC 51521 / SW) OX=414684 GN=sucC PE=3 SV=1
Potra2n8c17524	-1.09928	Downregulated	4	0.723	0.84	1.08996e-43	AT1G10630	ADP-ribosylation factor A1F|ARFA1F,ATARFA1F	sp|P04633|UCP1_RAT Mitochondrial brown fat uncoupling protein 1 OS=Rattus norvegicus OX=10116 GN=Ucp1 PE=1 SV=2
Potra2n562s35967	-1.09258	Downregulated	4	0.189	0.298	0.000288929	AT1G73140	trichome birefringence-like protein (DUF828)|TBL31	sp|Q93ZA5|TBL46_ARATH Putative truncated protein trichome birefringence-like 46 OS=Arabidopsis thaliana OX=3702 GN=TBL46 PE=5 SV=1
Potra2n16c29289	-1.06986	Downregulated	4	0.427	0.585	1.34283e-19	AT4G16380	Heavy metal transport/detoxification superfamily protein
Potra2n14c27264	-1.06967	Downregulated	4	0.791	0.874	2.12339e-38	AT4G01850	S-adenosylmethionine synthetase 2|AtSAM2,MAT2,SAM-2,SAM2	sp|P47293|METK_MYCGE S-adenosylmethionine synthase OS=Mycoplasma genitalium (strain ATCC 33530 / G-37 / NCTC 10195) OX=243273 GN=metK PE=3 SV=1
Potra2n3c6807	-1.05767	Downregulated	4	0.245	0.375	1.02246e-06	AT1G80940	Snf1 kinase interactor-like protein	sp|Q6K678|HDR1_ORYSJ Protein HEADING DATE REPRESSOR 1 OS=Oryza sativa subsp. japonica OX=39947 GN=HDR1 PE=1 SV=1
Potra2n3c8387	-1.05658	Downregulated	4	0.338	0.46	7.79299e-08	AT1G09610	glucuronoxylan 4-O-methyltransferase-like protein (DUF579)	sp|Q9SNE5|IRX15_ARATH Protein IRREGULAR XYLEM 15 OS=Arabidopsis thaliana OX=3702 GN=IRX15 PE=2 SV=1
Potra2n7c15863	-1.05297	Downregulated	4	0.323	0.439	4.62282e-08	AT5G65270	RAB GTPase homolog A4A|AtRABA4a,RABA4a	sp|P34148|RACB_DICDI Rho-related protein racB OS=Dictyostelium discoideum OX=44689 GN=racB PE=1 SV=1
Potra2n16c29505	-1.05252	Downregulated	4	0.552	0.709	5.73622e-28	AT5G12250	beta-6 tubulin|TUB6	sp|P02553|TBA_LYTPI Tubulin alpha chain (Fragment) OS=Lytechinus pictus OX=7653 PE=3 SV=1
Potra2n1c2437	-1.04874	Downregulated	4	0.407	0.567	5.31199e-16	AT3G51780	BCL-2-associated athanogene 4|ATBAG4,BAG4	sp|Q0WPX7|BAG2_ARATH BAG family molecular chaperone regulator 2 OS=Arabidopsis thaliana OX=3702 GN=BAG2 PE=1 SV=1
Potra2n1c2382	-1.04094	Downregulated	4	0.46	0.597	7.12624e-17	AT5G12250	beta-6 tubulin|TUB6	sp|P02553|TBA_LYTPI Tubulin alpha chain (Fragment) OS=Lytechinus pictus OX=7653 PE=3 SV=1
Potra2n12c24727	-1.03979	Downregulated	4	0.56	0.682	6.83522e-23	AT2G35120	Single hybrid motif superfamily protein	sp|A0A0H3JT43|GCVHL_STAAM Glycine cleavage system H-like protein OS=Staphylococcus aureus (strain Mu50 / ATCC 700699) OX=158878 GN=SAV0324 PE=1 SV=1
Potra2n3c6881	-1.03754	Downregulated	4	0.306	0.476	4.62196e-12	AT2G32670	vesicle-associated membrane protein 725|ATVAMP725,VAMP725	sp|P31109|SNC1_YEAST Synaptobrevin homolog 1 OS=Saccharomyces cerevisiae (strain ATCC 204508 / S288c) OX=559292 GN=SNC1 PE=1 SV=1
Potra2n15c28061	-1.03681	Downregulated	4	0.479	0.636	3.18266e-20	AT5G52060	BCL-2-associated athanogene 1|ATBAG1,BAG1	sp|O60125|BAG1A_SCHPO BAG family molecular chaperone regulator 1A OS=Schizosaccharomyces pombe (strain 972 / ATCC 24843) OX=284812 GN=bag101 PE=2 SV=1
Potra2n16c30483	-1.03472	Downregulated	4	0.224	0.338	0.000101987	AT2G38500	2-oxoglutarate (2OG) and Fe(II)-dependent oxygenase superfamily protein
Potra2n9c19505	-1.03297	Downregulated	4	0.738	0.831	3.14193e-37	AT5G12250	beta-6 tubulin|TUB6	sp|P02553|TBA_LYTPI Tubulin alpha chain (Fragment) OS=Lytechinus pictus OX=7653 PE=3 SV=1
Potra2n15c28316	-1.03004	Downregulated	4	0.336	0.492	1.04675e-11	AT4G24910	glucuronoxylan 4-O-methyltransferase-like protein (DUF579)	sp|Q9SNE5|IRX15_ARATH Protein IRREGULAR XYLEM 15 OS=Arabidopsis thaliana OX=3702 GN=IRX15 PE=2 SV=1
Potra2n14c26993	-1.02542	Downregulated	4	0.277	0.375	0.000221261	AT4G00440	GPI-anchored adhesin-like protein, putative (DUF3741)	sp|F4HSD5|TRM32_ARATH Protein TRM32 OS=Arabidopsis thaliana OX=3702 GN=TRM32 PE=2 SV=1
Potra2n1c3619	-1.02499	Downregulated	4	0.204	0.304	0.0031112	AT5G54690	galacturonosyltransferase 12|GAUT12,IRX8,LGT6	sp|Q9LN68|GATL1_ARATH Probable galacturonosyltransferase-like 1 OS=Arabidopsis thaliana OX=3702 GN=GATL1 PE=2 SV=1
Potra2n5c11608	-1.02085	Downregulated	4	0.285	0.41	3.57477e-07	AT3G19150	KIP-related protein 6	sp|Q67J15|KRP6_ORYSJ Cyclin-dependent kinase inhibitor 6 OS=Oryza sativa subsp. japonica OX=39947 GN=KRP6 PE=3 SV=1
Potra2n11c22774	-1.02078	Downregulated	4	0.985	0.995	2.30486e-64	AT3G15480	fiber (DUF1218)
Potra2n1c1276	-1.0167	Downregulated	4	0.191	0.29	0.0053298	AT2G44610	Ras-related small GTP-binding family protein|ATRAB6A,ATRABH1B,RAB6,RAB6A	sp|Q93Y31|ARL8B_ARATH ADP-ribosylation factor-like protein 8b OS=Arabidopsis thaliana OX=3702 GN=ARL8B PE=2 SV=1
Potra2n4c8529	-1.01314	Downregulated	4	0.446	0.588	1.11675e-16	AT1G11740	ankyrin repeat family protein
Potra2n14c26705	-1.00737	Downregulated	4	0.185	0.282	0.00563141	AT1G02130	RAS 5|ARA-5,ARA5,ATRAB1B,ATRABD2A,RA-5,RABD2A	sp|Q60529|RASH_MESAU GTPase HRas (Fragment) OS=Mesocricetus auratus OX=10036 GN=HRAS PE=3 SV=1
Potra2n13c26024	-1.00691	Downregulated	4	0.221	0.322	0.000749664	AT3G05000	Transport protein particle (TRAPP) component	sp|Q99394|TRS33_YEAST Trafficking protein particle complex subunit 33 OS=Saccharomyces cerevisiae (strain ATCC 204508 / S288c) OX=559292 GN=TRS33 PE=1 SV=1
Potra2n9c19246	-1.00683	Downregulated	4	0.937	0.926	1.39967e-21	AT4G34050	S-adenosyl-L-methionine-dependent methyltransferases superfamily protein	sp|B8NI24|IMQG_ASPFN O-methyltransferase imqG OS=Aspergillus flavus (strain ATCC 200026 / FGSC A1120 / NRRL 3357 / JCM 12722 / SRRC 167) OX=332952 GN=imqG PE=2 SV=1
Potra2n16c29504	-1.00199	Downregulated	4	0.45	0.615	4.66912e-18	AT2G40820	stomatal closure actin-binding-like protein	sp|O48791|SCAB1_ARATH Stomatal closure-related actin-binding protein 1 OS=Arabidopsis thaliana OX=3702 GN=SCAB1 PE=1 SV=1
Potra2n18c32081	1.00112	Upregulated	4	0.183	0.072	2.09681e-07	AT4G29900	autoinhibited Ca(2+)-ATPase 10	sp|Q8NB49|AT11C_HUMAN Phospholipid-transporting ATPase IG OS=Homo sapiens OX=9606 GN=ATP11C PE=1 SV=3
Potra2n2c4941	1.0033	Upregulated	4	0.333	0.152	4.46763e-13	AT4G01370	MAP kinase 4|ATMPK4,MPK4	sp|Q80YS9|STKL1_MOUSE Serine/threonine kinase-like domain-containing protein STKLD1 OS=Mus musculus OX=10090 GN=Stkld1 PE=2 SV=3
Potra2n6c12985	1.00836	Upregulated	4	0.552	0.258	6.6101e-25	AT2G32070	Polynucleotidyl transferase, ribonuclease H-like superfamily protein	sp|Q9LXM4|CAF1H_ARATH Putative CCR4-associated factor 1 homolog 8 OS=Arabidopsis thaliana OX=3702 GN=CAF1-8 PE=3 SV=1
Potra2n12c24321	1.00866	Upregulated	4	0.194	0.078	5.04383e-08	AT1G18890	calcium-dependent protein kinase 1|ATCDPK1,CDPK1,CPK10	sp|Q60855|RIPK1_MOUSE Receptor-interacting serine/threonine-protein kinase 1 OS=Mus musculus OX=10090 GN=Ripk1 PE=1 SV=1
Potra2n6c15133	1.0096	Upregulated	4	0.41	0.2	1.70629e-15	AT3G56880	VQ motif-containing protein	sp|O80683|CAB25_ARATH Calmodulin-binding protein 25 OS=Arabidopsis thaliana OX=3702 GN=CAMBP25 PE=1 SV=1
Potra2n1c601	1.01249	Upregulated	4	0.127	0.052	0.00108477	AT4G20170	glycosyltransferase family protein (DUF23)	sp|O16374|GALT1_CAEEL Beta-1,4-galactosyltransferase galt-1 OS=Caenorhabditis elegans OX=6239 GN=galt-1 PE=1 SV=4
Potra2n19c34065	1.01938	Upregulated	4	0.83	0.503	5.29528e-43
Potra2n17c31171	1.02053	Upregulated	4	0.269	0.113	3.39702e-11	AT3G01120	Pyridoxal phosphate (PLP)-dependent transferases superfamily protein|ATCYS1,CGS,CGS1,MTO1	sp|G8XHD7|BESB_STREN L-2-amino-4-chloropent-4-enoate dechlorinase/desaturase OS=Streptomyces cattleya (strain ATCC 35852 / DSM 46488 / JCM 4925 / NBRC 14057 / NRRL 8057) OX=1003195 GN=besB PE=1 SV=2
Potra2n13c25171	1.02296	Upregulated	4	0.3	0.12	5.08985e-14	AT1G53050	Protein kinase superfamily protein	sp|P35969|VGFR1_MOUSE Vascular endothelial growth factor receptor 1 OS=Mus musculus OX=10090 GN=Flt1 PE=1 SV=1
Potra2n13c26067	1.02445	Upregulated	4	0.166	0.066	3.63301e-06	AT2G29150	NAD(P)-binding Rossmann-fold superfamily protein	sp|O74628|YQ53_SCHPO Uncharacterized oxidoreductase C162.03 OS=Schizosaccharomyces pombe (strain 972 / ATCC 24843) OX=284812 GN=SPCC162.03 PE=3 SV=1
Potra2n8c16724	1.02477	Upregulated	4	0.132	0.06	0.00861455
Potra2n10c20586	1.02799	Upregulated	4	0.224	0.095	1.34559e-08	AT3G12570	FYD|FYD
Potra2n2c5300	1.02931	Upregulated	4	0.193	0.076	4.44522e-08	AT4G24210	F-box family protein|SLY1	sp|Q9LUB6|SNE_ARATH F-box protein SNE OS=Arabidopsis thaliana OX=3702 GN=SNE PE=1 SV=1
Potra2n13c25717	1.02974	Upregulated	4	0.425	0.182	3.88237e-21	AT1G28760	guanosine-3',5'-bis (diphosphate) 3'-pyrophosphohydrolase, putative (DUF2215)
Potra2n8c18360	1.0298	Upregulated	4	0.275	0.117	2.52151e-11	AT1G10740	alpha/beta-Hydrolases superfamily protein	sp|Q8NUI5|LIP1_STAAW Lipase 1 OS=Staphylococcus aureus (strain MW2) OX=196620 GN=lip1 PE=3 SV=2
Potra2n5c11419	1.03013	Upregulated	4	0.512	0.21	7.74124e-30
Potra2n4c10463	1.03174	Upregulated	4	0.14	0.053	1.48215e-05	AT5G61510	GroES-like zinc-binding alcohol dehydrogenase family protein	sp|Q55E72|PKS1_DICDI Probable polyketide synthase 1 OS=Dictyostelium discoideum OX=44689 GN=stlA PE=1 SV=1
Potra2n18c32392	1.03529	Upregulated	4	0.157	0.06	3.58829e-06	AT2G18700	trehalose phosphatase/synthase 11|ATTPS11,ATTPSB,TPS11	sp|P0CL50|OTSB_SALTY Trehalose-phosphate phosphatase OS=Salmonella typhimurium (strain LT2 / SGSC1412 / ATCC 700720) OX=99287 GN=otsB PE=3 SV=1
Potra2n6c14686	1.03704	Upregulated	4	0.143	0.059	0.000112523	AT2G19170	subtilisin-like serine protease 3|SLP3	sp|P07518|SUBT_BACPU Subtilisin OS=Bacillus pumilus OX=1408 GN=apr PE=1 SV=1
Potra2n2c4185	1.03983	Upregulated	4	0.249	0.101	5.23753e-11	AT3G25140	Nucleotide-diphospho-sugar transferases superfamily protein|GAUT8,QUA1	sp|A0A0H2URA3|GLYB_STRPN Glycosyltransferase GlyB OS=Streptococcus pneumoniae serotype 4 (strain ATCC BAA-334 / TIGR4) OX=170187 GN=glyB PE=3 SV=1
Potra2n18c32322	1.04011	Upregulated	4	0.61	0.288	8.81726e-32	AT4G30600	signal recognition particle receptor alpha subunit family protein	sp|O52256|FLHF_PSEPU Flagellar biosynthesis protein FlhF OS=Pseudomonas putida OX=303 GN=flhF PE=3 SV=1
Potra2n2c5866	1.04104	Upregulated	4	0.133	0.059	0.00266785	AT1G69640	sphingoid base hydroxylase 1|SBH1	sp|F4JLZ6|SMO13_ARATH Methylsterol monooxygenase 1-3 OS=Arabidopsis thaliana OX=3702 GN=SMO1-3 PE=2 SV=1
Potra2n11c23106	1.04142	Upregulated	4	0.13	0.051	0.000254598	AT1G29350	RNA polymerase II degradation factor-like protein (DUF1296)
Potra2n4c10170	1.04338	Upregulated	4	0.644	0.316	8.85476e-33	AT5G22250	Polynucleotidyl transferase, ribonuclease H-like superfamily protein	sp|Q9LXM4|CAF1H_ARATH Putative CCR4-associated factor 1 homolog 8 OS=Arabidopsis thaliana OX=3702 GN=CAF1-8 PE=3 SV=1
Potra2n2c5153	1.04591	Upregulated	4	0.275	0.119	2.30849e-11	AT4G09320	nucleoside diphosphate kinase|NDPK1	sp|Q8N427|TXND3_HUMAN Thioredoxin domain-containing protein 3 OS=Homo sapiens OX=9606 GN=NME8 PE=2 SV=2
Potra2n288s35210	1.04626	Upregulated	4	0.194	0.088	1.0726e-05	AT1G79750	NADP-malic enzyme 4|ATNADP-ME4,NADP-ME4	sp|P54572|MAO1_BACSU Probable NAD-dependent malic enzyme 1 OS=Bacillus subtilis (strain 168) OX=224308 GN=yqkJ PE=3 SV=1
Potra2n2c6043	1.04663	Upregulated	4	0.221	0.097	2.65922e-08	AT3G54650	RNI-like superfamily protein|FBL17	sp|Q96IG2|FXL20_HUMAN F-box/LRR-repeat protein 20 OS=Homo sapiens OX=9606 GN=FBXL20 PE=1 SV=2
Potra2n18c32855	1.0485	Upregulated	4	0.498	0.231	2.5651e-23	AT1G79750	NADP-malic enzyme 4|ATNADP-ME4,NADP-ME4	sp|P16468|MAOX_GEOSE NAD-dependent malic enzyme OS=Geobacillus stearothermophilus OX=1422 PE=1 SV=1
Potra2n13c24932	1.05228	Upregulated	4	0.166	0.059	4.67816e-08	AT1G09575	calcium uniporter-like protein (DUF607)	sp|Q9NWR8|MCUB_HUMAN Calcium uniporter regulatory subunit MCUb, mitochondrial OS=Homo sapiens OX=9606 GN=MCUB PE=1 SV=2
Potra2n10c21500	1.05337	Upregulated	4	0.133	0.047	6.05013e-06	AT1G70670	Caleosin-related family protein	sp|F4I4P8|PXGL_ARATH Probable inactive peroxygenase-like protein OS=Arabidopsis thaliana OX=3702 GN=At1g23250 PE=3 SV=1
Potra2n12c24358	1.05396	Upregulated	4	0.329	0.137	3.60959e-15
Potra2n9c19465	1.05476	Upregulated	4	0.384	0.152	4.10951e-20
Potra2n16c30352	1.05924	Upregulated	4	0.547	0.251	1.6009e-28	AT5G01320	Thiamine pyrophosphate dependent pyruvate decarboxylase family protein	sp|Q65D03|IOLD_BACLD 3D-(3,5/4)-trihydroxycyclohexane-1,2-dione hydrolase OS=Bacillus licheniformis (strain ATCC 14580 / DSM 13 / JCM 2505 / NBRC 12200 / NCIMB 9375 / NRRL NRS-1264 / Gibson 46) OX=279010 GN=iolD PE=3 SV=1
Potra2n2c6331	1.06214	Upregulated	4	0.153	0.072	0.00149152	AT1G76160	SKU5 similar 5|sks5	sp|A0A0B4HQH6|MLAC1_METMF Laccase 1 OS=Metarhizium majus (strain ARSEF 297) OX=1276143 GN=Mlac1 PE=3 SV=1
Potra2n9c19303	1.06655	Upregulated	4	0.142	0.056	4.61433e-05	AT2G14960	Auxin-responsive GH3 family protein|GH3.1	sp|Q8N2G8|GHDC_HUMAN GH3 domain-containing protein OS=Homo sapiens OX=9606 GN=GHDC PE=1 SV=2
Potra2n2c4811	1.06735	Upregulated	4	0.221	0.095	4.78393e-08	AT2G46620	P-loop containing nucleoside triphosphate hydrolases superfamily protein	sp|Q01939|PRS8_YEAST 26S proteasome regulatory subunit 8 homolog OS=Saccharomyces cerevisiae (strain ATCC 204508 / S288c) OX=559292 GN=RPT6 PE=1 SV=4
Potra2n13c26206	1.07285	Upregulated	4	0.119	0.044	0.000133766	AT5G57580	Calmodulin-binding protein	sp|C0SVV6|CB60A_ARATH Calmodulin-binding protein 60 A OS=Arabidopsis thaliana OX=3702 GN=CBP60A PE=2 SV=1
Potra2n3c7616	1.07322	Upregulated	4	0.193	0.076	4.05968e-08	AT2G15480	UDP-glucosyl transferase 73B5|UGT73B5	sp|Q40287|UFOG5_MANES Anthocyanidin 3-O-glucosyltransferase 5 OS=Manihot esculenta OX=3983 GN=GT5 PE=2 SV=1
Potra2n6c15346	1.07637	Upregulated	4	0.31	0.121	1.53732e-15	AT5G47710	Calcium-dependent lipid-binding (CaLB domain) family protein	sp|A1D3C5|RSP5_NEOFI Probable E3 ubiquitin-protein ligase hulA OS=Neosartorya fischeri (strain ATCC 1020 / DSM 3700 / CBS 544.65 / FGSC A1164 / JCM 1740 / NRRL 181 / WB 181) OX=331117 GN=hulA PE=3 SV=1
Potra2n10c22355	1.07735	Upregulated	4	0.349	0.152	1.04621e-15	AT4G16120	COBRA-like protein-7 precursor|ATSEB1,COBL7,SEB1	sp|Q75IW1|COBL2_ORYSJ COBRA-like protein 2 OS=Oryza sativa subsp. japonica OX=39947 GN=BC1L2 PE=2 SV=1
Potra2n1c3018	1.07867	Upregulated	4	0.316	0.128	1.41532e-15	AT5G50180	Protein kinase superfamily protein	sp|C0LGH8|Y1634_ARATH Probable LRR receptor-like serine/threonine-protein kinase At1g63430 OS=Arabidopsis thaliana OX=3702 GN=At1g63430 PE=1 SV=1
Potra2n4c9968	1.07904	Upregulated	4	0.137	0.056	0.000172805
Potra2n10c21741	1.08001	Upregulated	4	0.484	0.205	2.22946e-26	AT4G14640	calmodulin 8|CAM8	sp|D3GME4|PRVB_SCOSC Parvalbumin beta OS=Scomber scombrus OX=13677 GN=pvalb PE=1 SV=1
Potra2n2c5676	1.0821	Upregulated	4	0.353	0.168	2.3737e-13	AT1G77490	thylakoidal ascorbate peroxidase	sp|Q9PBB2|KATG_XYLFA Catalase-peroxidase OS=Xylella fastidiosa (strain 9a5c) OX=160492 GN=katG PE=3 SV=1
Potra2n1c2071	1.08747	Upregulated	4	0.422	0.19	2.78861e-19	AT2G28890	poltergeist like 4|PLL4	sp|Q9XGZ9|P2C72_ARATH Probable protein phosphatase 2C 72 OS=Arabidopsis thaliana OX=3702 GN=At5g26010 PE=2 SV=2
Potra2n1c1476	1.0921	Upregulated	4	0.815	0.444	3.90309e-45	AT1G17420	lipoxygenase 3|LOX3	sp|T0JRM4|MNLOX_COLGC Manganese lipoxygenase OS=Colletotrichum gloeosporioides (strain Cg-14) OX=1237896 GN=CGLO_15145 PE=1 SV=1
Potra2n4c9996	1.09603	Upregulated	4	0.239	0.101	6.34528e-10	AT5G42190	E3 ubiquitin ligase SCF complex subunit SKP1/ASK1 family protein|ASK2,SKP1B	sp|A8MQG7|ASK20_ARATH SKP1-like protein 20 OS=Arabidopsis thaliana OX=3702 GN=ASK20 PE=2 SV=1
Potra2n6c13300	1.09857	Upregulated	4	0.221	0.093	1.44513e-08	AT2G26110	bromodomain protein (DUF761)	sp|F4K956|A70_ARATH Pathogen-associated molecular patterns-induced protein A70 OS=Arabidopsis thaliana OX=3702 GN=A70 PE=1 SV=1
Potra2n4c9805	1.10173	Upregulated	4	0.376	0.164	6.94567e-17	AT4G34480	O-Glycosyl hydrolases family 17 protein	sp|Q06915|EA6_ARATH Probable glucan endo-1,3-beta-glucosidase A6 OS=Arabidopsis thaliana OX=3702 GN=A6 PE=2 SV=1
Potra2n1c1684	1.10449	Upregulated	4	0.542	0.252	1.71042e-26
Potra2n18c32465	1.10577	Upregulated	4	0.527	0.221	1.614e-29	AT4G30210	P450 reductase 2|AR2,ATR2	sp|Q9AIX6|BOXA_AZOEV Benzoyl-CoA oxygenase component A OS=Azoarcus evansii OX=59406 GN=boxA PE=1 SV=1
Potra2n4c9991	1.10688	Upregulated	4	0.947	0.662	1.95076e-74	AT4G38580	farnesylated protein 6	sp|Q9LP41|HIP29_ARATH Heavy metal-associated isoprenylated plant protein 29 OS=Arabidopsis thaliana OX=3702 GN=HIPP29 PE=3 SV=1
Potra2n12c24069	1.10743	Upregulated	4	0.514	0.231	2.28648e-26	AT1G68090	annexin 5	sp|Q9UJ72|ANX10_HUMAN Annexin A10 OS=Homo sapiens OX=9606 GN=ANXA10 PE=1 SV=3
Potra2n3c7764	1.12308	Upregulated	4	0.315	0.111	5.00334e-19	AT5G47070	Protein kinase superfamily protein	sp|Q54VU4|Y8013_DICDI Probable serine/threonine-protein kinase DDB_G0280133 OS=Dictyostelium discoideum OX=44689 GN=DDB_G0280133 PE=3 SV=1
Potra2n14c26593	1.12557	Upregulated	4	0.232	0.09	3.47545e-11	AT1G47710	Serine protease inhibitor (SERPIN) family protein	sp|P16708|UFAP_PIG Uteroferrin-associated protein OS=Sus scrofa OX=9823 PE=1 SV=1
Potra2n5c10760	1.12755	Upregulated	4	0.143	0.061	0.000216826	AT1G09850	xylem bark cysteine peptidase 3|XBCP3	sp|P05993|PAPA5_CARPA Cysteine proteinase (Fragment) OS=Carica papaya OX=3649 PE=2 SV=1
Potra2n9c18790	1.13055	Upregulated	4	0.175	0.076	7.62241e-06	AT5G21990	Tetratricopeptide repeat (TPR)-like superfamily protein	sp|Q6CL78|PPID_KLULA Peptidyl-prolyl cis-trans isomerase D OS=Kluyveromyces lactis (strain ATCC 8585 / CBS 2359 / DSM 70799 / NBRC 1267 / NRRL Y-1140 / WM37) OX=284590 GN=CPR6 PE=3 SV=1
Potra2n4c9185	1.13243	Upregulated	4	0.143	0.058	8.58332e-05	AT3G59990	methionine aminopeptidase 2B|MAP2B	sp|P44421|MAP1_HAEIN Methionine aminopeptidase OS=Haemophilus influenzae (strain ATCC 51907 / DSM 11121 / KW20 / Rd) OX=71421 GN=map PE=3 SV=1
Potra2n4c9454	1.13637	Upregulated	4	0.129	0.056	0.00171943	AT3G30390	Transmembrane amino acid transporter family protein	sp|Q8R1S9|S38A4_MOUSE Sodium-coupled neutral amino acid transporter 4 OS=Mus musculus OX=10090 GN=Slc38a4 PE=1 SV=1
Potra2n12c24306	1.13643	Upregulated	4	0.27	0.099	2.5359e-14	AT3G47730	ATP-binding cassette A2|ABCA2,ATATH1,ATH1	sp|Q2NTI7|ZNUC_SODGM Zinc import ATP-binding protein ZnuC OS=Sodalis glossinidius (strain morsitans) OX=343509 GN=znuC PE=3 SV=1
Potra2n1c885	1.13899	Upregulated	4	0.848	0.492	4.22411e-55	AT4G11600	glutathione peroxidase 6|ATGPX6,GPX6,LSC803,PHGPX	sp|P35666|GPXC_WUCBA Cuticular glutathione peroxidase OS=Wuchereria bancrofti OX=6293 PE=2 SV=1
Potra2n4c9941	1.14424	Upregulated	4	0.203	0.08	6.70491e-09	AT2G21120	magnesium transporter, putative (DUF803)	sp|Q8BHK1|NIPA1_MOUSE Magnesium transporter NIPA1 OS=Mus musculus OX=10090 GN=Nipa1 PE=1 SV=1
Potra2n13c25215	1.14728	Upregulated	4	0.964	0.647	3.32833e-85	AT3G54420	homolog of carrot EP3-3 chitinase|ATCHITIV,ATEP3,CHIV,EP3	sp|Q9MA41|CTL1_ARATH Chitinase-like protein 1 OS=Arabidopsis thaliana OX=3702 GN=CTL1 PE=1 SV=1
Potra2n2c4158	1.14752	Upregulated	4	0.203	0.086	1.32082e-07	AT3G25290	Auxin-responsive family protein	sp|A4QP81|FRRS1_DANRE Putative ferric-chelate reductase 1 OS=Danio rerio OX=7955 GN=frrs1 PE=2 SV=1
Potra2n14c26690	1.14902	Upregulated	4	0.152	0.062	2.67318e-05	AT1G02120	GRAM domain family protein	sp|Q8MVR1|GBPC_DICDI Cyclic GMP-binding protein C OS=Dictyostelium discoideum OX=44689 GN=gbpC PE=1 SV=1
Potra2n4c9650	1.1494	Upregulated	4	0.942	0.644	5.59715e-75	AT4G15093	catalytic LigB subunit of aromatic ring-opening dioxygenase family	sp|O74741|DIOXL_SCHPO 4,5-DOPA dioxygenase extradiol-like protein OS=Schizosaccharomyces pombe (strain 972 / ATCC 24843) OX=284812 GN=SPBC1709.16c PE=3 SV=2
Potra2n1c3805	1.15142	Upregulated	4	0.334	0.139	3.05766e-16	AT4G10490	2-oxoglutarate (2OG) and Fe(II)-dependent oxygenase superfamily protein	sp|Q8XPV7|EFE_RALSO 2-oxoglutarate-dependent ethylene/succinate-forming enzyme OS=Ralstonia solanacearum (strain GMI1000) OX=267608 GN=efe PE=3 SV=1
Potra2n3c6877	1.1528	Upregulated	4	0.112	0.045	0.00274909	AT3G24170	glutathione-disulfide reductase|ATGR1,GR1	sp|Q67QU3|FENR_SYMTH Ferredoxin--NADP reductase OS=Symbiobacterium thermophilum (strain T / IAM 14863) OX=292459 GN=STH965 PE=3 SV=1
Potra2n5c11117	1.15613	Upregulated	4	0.18	0.073	3.99189e-07	AT1G43170	ribosomal protein 1|ARP1,emb2207,RP1,RPL3A	sp|Q2S3R4|RL3_SALRD 50S ribosomal protein L3 OS=Salinibacter ruber (strain DSM 13855 / M31) OX=309807 GN=rplC PE=3 SV=1
Potra2n3c6715	1.15687	Upregulated	4	0.191	0.065	5.43905e-11	AT3G54390	sequence-specific DNA binding transcription factor	sp|Q9SYG2|ASIL1_ARATH Trihelix transcription factor ASIL1 OS=Arabidopsis thaliana OX=3702 GN=ASIL1 PE=1 SV=1
Potra2n9c18819	1.15822	Upregulated	4	0.132	0.044	1.08286e-06	AT1G08250	arogenate dehydratase 6|ADT6	sp|P32452|PHA2_YEAST Putative prephenate dehydratase OS=Saccharomyces cerevisiae (strain ATCC 204508 / S288c) OX=559292 GN=PHA2 PE=1 SV=3
Potra2n5c11202	1.15836	Upregulated	4	0.273	0.11	7.34783e-13	AT1G21380	Target of Myb protein 1	sp|Q06336|GGA1_YEAST ADP-ribosylation factor-binding protein GGA1 OS=Saccharomyces cerevisiae (strain ATCC 204508 / S288c) OX=559292 GN=GGA1 PE=1 SV=1
Potra2n11c22682	1.1615	Upregulated	4	0.558	0.252	1.91373e-29	AT5G54650	formin homology5|ATFH5,Fh5	sp|Q9VUC6|FRL_DROME Formin-like protein OS=Drosophila melanogaster OX=7227 GN=Frl PE=1 SV=3
Potra2n13c26094	1.16453	Upregulated	4	0.277	0.103	1.36963e-15	AT3G05290	peroxisomal adenine nucleotide carrier 1|PNC1	sp|Q12251|YP011_YEAST Uncharacterized mitochondrial carrier YPR011C OS=Saccharomyces cerevisiae (strain ATCC 204508 / S288c) OX=559292 GN=YPR011C PE=1 SV=1
Potra2n4c10480	1.16695	Upregulated	4	0.138	0.056	0.000144493	AT4G19210	RNAse l inhibitor protein 2|ATRLI2,RLI2	sp|P44692|ZNUC_HAEIN Zinc import ATP-binding protein ZnuC OS=Haemophilus influenzae (strain ATCC 51907 / DSM 11121 / KW20 / Rd) OX=71421 GN=znuC PE=3 SV=1
Potra2n3c6548	1.16729	Upregulated	4	0.114	0.045	0.00154561	AT5G06730	Peroxidase superfamily protein	sp|P15984|PERX_WHEAT Peroxidase (Fragment) OS=Triticum aestivum OX=4565 PE=2 SV=1
Potra2n12c24799	1.16826	Upregulated	4	0.153	0.059	2.49414e-06	AT5G51770	Protein kinase superfamily protein	sp|Q9SCU5|WNK5_ARATH Probable serine/threonine-protein kinase WNK5 OS=Arabidopsis thaliana OX=3702 GN=WNK5 PE=1 SV=2
Potra2n2c4501	1.17147	Upregulated	4	0.147	0.054	2.21314e-06			sp|O59793|ESS2_SCHPO Stress response protein bis1 OS=Schizosaccharomyces pombe (strain 972 / ATCC 24843) OX=284812 GN=bis1 PE=1 SV=1
Potra2n1c890	1.17196	Upregulated	4	0.787	0.41	4.00177e-50	AT3G48990	AMP-dependent synthetase and ligase family protein	sp|Q4H424|PERA_EPIFF Peramine synthetase OS=Epichloe festucae (strain Fl1) OX=877507 GN=perA PE=2 SV=2
Potra2n7c15767	1.1732	Upregulated	4	0.155	0.066	7.51116e-05	AT4G33440	Pectin lyase-like superfamily protein	sp|O74213|PGLR1_ASPAC Endopolygalacturonase I OS=Aspergillus aculeatus OX=5053 GN=pgaI PE=1 SV=1
Potra2n4c9829	1.17715	Upregulated	4	0.4	0.151	1.23169e-24	AT2G21620	Adenine nucleotide alpha hydrolases-like superfamily protein|RD2
Potra2n16c29358	1.17803	Upregulated	4	0.175	0.067	1.16445e-07	AT3G51970	acyl-CoA sterol acyl transferase 1|ASAT1,ATASAT1,ATSAT1	sp|Q9FJ78|WAXS7_ARATH Probable long-chain-alcohol O-fatty-acyltransferase 7 OS=Arabidopsis thaliana OX=3702 GN=AT7 PE=3 SV=1
Potra2n1c1515	1.17855	Upregulated	4	0.227	0.083	2.64129e-12	AT5G20100	plant/protein	sp|Q9SSC1|Y1801_ARATH MAPK kinase substrate protein At1g80180 OS=Arabidopsis thaliana OX=3702 GN=At1g80180 PE=1 SV=1
Potra2n16c30255	1.17859	Upregulated	4	0.137	0.045	3.68214e-07	AT2G37970	SOUL heme-binding family protein|SOUL-1	sp|Q9SR77|HBPL1_ARATH Heme-binding-like protein At3g10130, chloroplastic OS=Arabidopsis thaliana OX=3702 GN=At3g10130 PE=1 SV=1
Potra2n1c2435	1.18047	Upregulated	4	0.208	0.082	2.4195e-09	AT2G30080	ZIP metal ion transporter family|ATZIP6,ZIP6	sp|Q852F6|ZIP2_ORYSJ Zinc transporter 2 OS=Oryza sativa subsp. japonica OX=39947 GN=ZIP2 PE=2 SV=1
Potra2n2c5469	1.18335	Upregulated	4	0.616	0.295	9.31829e-34	AT2G22500	uncoupling protein 5	sp|Q54BF6|MCFN_DICDI Mitochondrial substrate carrier family protein N OS=Dictyostelium discoideum OX=44689 GN=mcfN PE=1 SV=2
Potra2n17c31134	1.18438	Upregulated	4	0.349	0.149	4.57179e-17	AT5G15470	galacturonosyltransferase 14|GAUT14	sp|Q6DJM3|GL8D1_XENLA Glycosyltransferase 8 domain-containing protein 1 OS=Xenopus laevis OX=8355 GN=glt8d1 PE=2 SV=1
Potra2n3c7587	1.18513	Upregulated	4	0.11	0.04	0.000504548	AT1G32350	alternative oxidase 1D	sp|Q8J0I8|AOX_YARLI Alternative oxidase, mitochondrial OS=Yarrowia lipolytica (strain CLIB 122 / E 150) OX=284591 GN=AOX PE=3 SV=1
Potra2n16c30476	1.18963	Upregulated	4	0.305	0.116	5.78234e-17	AT5G58380	SOS3-interacting protein 1|CIPK10,PKS2,SIP1,SNRK3.8	sp|Q555U5|Y4821_DICDI Probable inactive serine/threonine-protein kinase DDB_G0274821 OS=Dictyostelium discoideum OX=44689 GN=DDB_G0274821 PE=3 SV=1
Potra2n8c17502	1.19028	Upregulated	4	0.105	0.04	0.00315769	AT3G08900	reversibly glycosylated polypeptide 3|RGP,RGP3	sp|P85413|RGP1_PHODC Probable UDP-arabinopyranose mutase 1 (Fragments) OS=Phoenix dactylifera OX=42345 PE=1 SV=1
Potra2n10c20764	1.1938	Upregulated	4	0.7	0.325	1.34979e-43
Potra2n18c32288	1.19482	Upregulated	4	0.245	0.144	0.00658128
Potra2n507s35843	1.19608	Upregulated	4	0.125	0.044	1.38632e-05	AT4G26690	PLC-like phosphodiesterase family protein|GPDL2,MRH5,SHV3	sp|Q9LVN0|GPDL7_ARATH Glycerophosphodiester phosphodiesterase GDPDL7 OS=Arabidopsis thaliana OX=3702 GN=GDPDL7 PE=2 SV=1
Potra2n2c4883	1.19615	Upregulated	4	0.119	0.044	0.000135718	AT4G01070	UDP-Glycosyltransferase superfamily protein|GT72B1,UGT72B1	sp|Q40286|UFOG4_MANES Anthocyanidin 3-O-glucosyltransferase 4 (Fragment) OS=Manihot esculenta OX=3983 GN=GT4 PE=2 SV=1
Potra2n3c8050	1.19682	Upregulated	4	0.295	0.122	3.5546e-14	AT5G45280	Pectinacetylesterase family protein	sp|Q6DFZ6|NOT1B_DANRE Inactive palmitoleoyl-protein carboxylesterase notum1b OS=Danio rerio OX=7955 GN=notum1b PE=2 SV=1
Potra2n11c22567	1.19743	Upregulated	4	0.18	0.064	5.39799e-09	AT1G76520	Auxin efflux carrier family protein	sp|Q9C999|PILS2_ARATH Protein PIN-LIKES 2 OS=Arabidopsis thaliana OX=3702 GN=PILS2 PE=2 SV=1
Potra2n1c3196	1.20059	Upregulated	4	0.577	0.245	1.15646e-35	AT3G13110	serine acetyltransferase 2;2|ATSERAT2;2,SAT-1,SAT-A,SAT-M,SAT3,SERAT2;2	sp|P28266|NODL_RHIME Nodulation protein L OS=Rhizobium meliloti (strain 1021) OX=266834 GN=nodL PE=3 SV=1
Potra2n18c32672	1.20551	Upregulated	4	0.423	0.176	4.88494e-23	AT4G26270	phosphofructokinase 3|PFK3	sp|B0RP51|PFP_XANCB Pyrophosphate--fructose 6-phosphate 1-phosphotransferase OS=Xanthomonas campestris pv. campestris (strain B100) OX=509169 GN=pfp PE=1 SV=1
Potra2n4c9508	1.20646	Upregulated	4	0.334	0.132	3.51793e-18	AT3G02230	reversibly glycosylated polypeptide 1|ATRGP1,RGP1	sp|P85413|RGP1_PHODC Probable UDP-arabinopyranose mutase 1 (Fragments) OS=Phoenix dactylifera OX=42345 PE=1 SV=1
Potra2n1c1049	1.20673	Upregulated	4	0.939	0.564	1.90147e-84	AT1G62510	Bifunctional inhibitor/lipid-transfer protein/seed storage 2S albumin superfamily protein	sp|P24337|HPSE_SOYBN Hydrophobic seed protein OS=Glycine max OX=3847 PE=1 SV=1
Potra2n2c5579	1.20989	Upregulated	4	0.214	0.082	3.08339e-10
Potra2n18c32622	1.21037	Upregulated	4	0.328	0.123	2.88329e-19
Potra2n5c12665	1.21196	Upregulated	4	0.161	0.06	2.10263e-07	AT5G57580	Calmodulin-binding protein	sp|Q9C9T2|SARD1_ARATH Protein SAR DEFICIENT 1 OS=Arabidopsis thaliana OX=3702 GN=SARD1 PE=1 SV=1
Potra2n1c721	1.21544	Upregulated	4	0.618	0.246	3.71673e-43
Potra2n751s36681	1.216	Upregulated	4	1	0.987	1.22781e-172
Potra2n19c33348	1.21829	Upregulated	4	0.921	0.587	1.1274e-73	AT5G54490	pinoid-binding protein 1|PBP1	sp|O35648|CETN3_MOUSE Centrin-3 OS=Mus musculus OX=10090 GN=Cetn3 PE=1 SV=1
Potra2n2c4483	1.22341	Upregulated	4	0.153	0.053	9.27276e-08	AT2G44310	Calcium-binding EF-hand family protein
Potra2n9c19402	1.22412	Upregulated	4	0.183	0.064	9.64539e-10	AT5G64510	tunicamycin induced protein
Potra2n9c20048	1.22468	Upregulated	4	0.326	0.126	4.89505e-18	AT5G60790	ABC transporter family protein|ATGCN1,GCN1	sp|Q55791|Y075_SYNY3 Probable ATP-dependent transporter slr0075 OS=Synechocystis sp. (strain PCC 6803 / Kazusa) OX=1111708 GN=slr0075 PE=3 SV=1
Potra2n1c804	1.22751	Upregulated	4	0.204	0.072	1.35051e-11	AT1G64140	WRKY transcription factor	sp|Q9SZ67|WRK19_ARATH Probable WRKY transcription factor 19 OS=Arabidopsis thaliana OX=3702 GN=WRKY19 PE=3 SV=1
Potra2n8c17375	1.22839	Upregulated	4	0.26	0.096	2.40167e-14	AT3G19830	Calcium-dependent lipid-binding (CaLB domain) family protein
Potra2n14c27409	1.23272	Upregulated	4	0.722	0.401	5.14101e-40	AT3G62830	NAD(P)-binding Rossmann-fold superfamily protein|ATUXS2,AUD1,UXS2	sp|Q3J7X9|HLDD_NITOC ADP-L-glycero-D-manno-heptose-6-epimerase OS=Nitrosococcus oceani (strain ATCC 19707 / BCRC 17464 / NCIMB 11848 / C-107) OX=323261 GN=hldD PE=3 SV=1
Potra2n1c318	1.23285	Upregulated	4	0.12	0.04	6.5578e-06	AT1G16170	ephrin-A3 protein
Potra2n6c15263	1.23317	Upregulated	4	0.83	0.412	7.37039e-68	AT5G47550	Cystatin/monellin superfamily protein	sp|Q8LC76|CYT7_ARATH Cysteine proteinase inhibitor 7 OS=Arabidopsis thaliana OX=3702 GN=CYS7 PE=2 SV=2
Potra2n12c24118	1.23397	Upregulated	4	0.133	0.044	6.61485e-07	AT3G17980	Calcium-dependent lipid-binding (CaLB domain) family protein	sp|Q9M2T2|PP16A_ARATH 16 kDa phloem protein 1 OS=Arabidopsis thaliana OX=3702 GN=PP16-1 PE=1 SV=1
Potra2n10c21738	1.23533	Upregulated	4	0.213	0.079	6.46309e-11	AT3G22890	ATP sulfurylase 1|APS1	sp|Q54506|SAT_RIFPS Sulfate adenylyltransferase OS=Riftia pachyptila sulfur-oxidizing endosymbiont OX=35843 GN=sat PE=1 SV=1
Potra2n9c19862	1.23557	Upregulated	4	0.208	0.079	5.89863e-10	AT1G07630	pol-like 5|PLL5	sp|Q8RXZ4|P2C18_ARATH Probable protein phosphatase 2C 18 OS=Arabidopsis thaliana OX=3702 GN=At1g79630 PE=2 SV=1
Potra2n2c6421	1.23702	Upregulated	4	0.288	0.111	4.1894e-16	AT1G76490	hydroxy methylglutaryl CoA reductase 1|HMG1,HMGR1	sp|O28538|HMDH_ARCFU 3-hydroxy-3-methylglutaryl-coenzyme A reductase OS=Archaeoglobus fulgidus (strain ATCC 49558 / VC-16 / DSM 4304 / JCM 9628 / NBRC 100126) OX=224325 GN=hmgA PE=3 SV=1
Potra2n2c5261	1.2382	Upregulated	4	0.301	0.109	4.5866e-18	AT4G25000	alpha-amylase-like protein|AMY1,ATAMY1	sp|Q02751|MALT_CANAX Alpha-glucosidase OS=Candida albicans OX=5476 GN=MAL2 PE=1 SV=4
Potra2n2c6276	1.23893	Upregulated	4	0.17	0.058	4.58102e-09	AT2G17787	cylicin
Potra2n7c16152	1.24002	Upregulated	4	0.142	0.057	5.62403e-05	AT4G37640	calcium ATPase 2|ACA2	sp|Q9M3H5|HMA1_ARATH Probable cadmium/zinc-transporting ATPase HMA1, chloroplastic OS=Arabidopsis thaliana OX=3702 GN=HMA1 PE=2 SV=2
Potra2n5c11205	1.24708	Upregulated	4	0.272	0.104	1.5374e-14	AT2G34300	S-adenosyl-L-methionine-dependent methyltransferases superfamily protein	sp|Q8GYW9|PMT4_ARATH Probable methyltransferase PMT4 OS=Arabidopsis thaliana OX=3702 GN=At1g13860 PE=2 SV=2
Potra2n2c4635	1.24718	Upregulated	4	0.165	0.063	3.86753e-07	AT3G62410	CP12 domain-containing protein 2|CP12,CP12-2	sp|Q9C9K2|CP123_ARATH Calvin cycle protein CP12-3, chloroplastic OS=Arabidopsis thaliana OX=3702 GN=CP12-3 PE=1 SV=1
Potra2n10c22317	1.24817	Upregulated	4	0.165	0.056	5.12537e-09
Potra2n10c21426	1.24887	Upregulated	4	0.176	0.066	2.63075e-08	AT2G01300	mediator of RNA polymerase II transcription subunit
Potra2n6c13787	1.2533	Upregulated	4	0.26	0.091	1.06942e-15	AT4G30440	UDP-D-glucuronate 4-epimerase 1|GAE1	sp|Q0KDH0|HLDD_CUPNH ADP-L-glycero-D-manno-heptose-6-epimerase OS=Cupriavidus necator (strain ATCC 17699 / H16 / DSM 428 / Stanier 337) OX=381666 GN=hldD PE=3 SV=1
Potra2n5c11803	1.25458	Upregulated	4	0.171	0.067	3.25038e-07	AT5G66210	calcium-dependent protein kinase 28|CPK28	sp|Q9C823|Y1523_ARATH C-type lectin receptor-like tyrosine-protein kinase At1g52310 OS=Arabidopsis thaliana OX=3702 GN=At1g52310 PE=2 SV=1
Potra2n13c24942	1.25659	Upregulated	4	0.964	0.645	7.19924e-96	AT1G14320	Ribosomal protein L16p/L10e family protein|RPL10,RPL10A,SAC52	sp|Q74M84|RL10E_NANEQ 50S ribosomal protein L10e OS=Nanoarchaeum equitans (strain Kin4-M) OX=228908 GN=rpl10e PE=3 SV=1
Potra2n18c32312	1.25682	Upregulated	4	0.763	0.427	5.74445e-50	AT1G13950	eukaryotic elongation factor 5A-1|ATELF5A-1,EIF-5A,EIF5A,ELF5A-1	sp|Q8PYE0|IF5A_METMA Translation initiation factor 5A OS=Methanosarcina mazei (strain ATCC BAA-159 / DSM 3647 / Goe1 / Go1 / JCM 11833 / OCM 88) OX=192952 GN=eif5a PE=3 SV=1
Potra2n1c16	1.25706	Upregulated	4	0.11	0.036	3.31051e-05	AT5G56350	Pyruvate kinase family protein	sp|P19680|KPYK_SPICI Pyruvate kinase (Fragment) OS=Spiroplasma citri OX=2133 GN=pyk PE=3 SV=1
Potra2n9c19263	1.25889	Upregulated	4	0.104	0.035	0.000117433	AT4G34150	Calcium-dependent lipid-binding (CaLB domain) family protein	sp|Q8L7A4|AGD11_ARATH Probable ADP-ribosylation factor GTPase-activating protein AGD11 OS=Arabidopsis thaliana OX=3702 GN=AGD11 PE=2 SV=1
Potra2n5c11751	1.2608	Upregulated	4	0.104	0.032	2.26598e-05	AT1G75440	ubiquitin-conjugating enzyme 16|UBC16	sp|Q95XX0|UBC13_CAEEL Ubiquitin-conjugating enzyme E2 13 OS=Caenorhabditis elegans OX=6239 GN=ubc-13 PE=1 SV=2
Potra2n13c26304	1.26752	Upregulated	4	0.25	0.096	4.65943e-13	AT5G26670	Pectinacetylesterase family protein	sp|Q6DFZ6|NOT1B_DANRE Inactive palmitoleoyl-protein carboxylesterase notum1b OS=Danio rerio OX=7955 GN=notum1b PE=2 SV=1
Potra2n5c11027	1.27243	Upregulated	4	0.367	0.142	6.38188e-21	AT3G59080	Eukaryotic aspartyl protease family protein	sp|P69477|NEP2_NEPDI Aspartic proteinase nepenthesin-2 (Fragments) OS=Nepenthes distillatoria OX=122309 PE=1 SV=1
Potra2n12c24450	1.27642	Upregulated	4	0.171	0.06	4.52536e-09	AT5G03340	ATPase, AAA-type, CDC48 protein	sp|P61533|RUVB_LACJO Holliday junction ATP-dependent DNA helicase RuvB OS=Lactobacillus johnsonii (strain CNCM I-12250 / La1 / NCC 533) OX=257314 GN=ruvB PE=3 SV=1
Potra2n6c14201	1.2802	Upregulated	4	0.165	0.057	9.38617e-09	AT2G37040	PHE ammonia lyase 1|ATPAL1,PAL1	sp|Q92195|PALY_AGABI Phenylalanine ammonia-lyase (Fragment) OS=Agaricus bisporus OX=5341 GN=palA PE=2 SV=1
Potra2n16c30248	1.28053	Upregulated	4	0.142	0.044	1.46296e-08	AT3G54040	PAR1 protein
Potra2n18c32663	1.28121	Upregulated	4	0.147	0.06	3.50275e-05	AT5G20070	nudix hydrolase homolog 19|ATNUDT19,ATNUDX19,NUDX19	sp|Q19427|NPY1_CAEEL NADH pyrophosphatase OS=Caenorhabditis elegans OX=6239 GN=ndx-9 PE=1 SV=3
Potra2n2c5377	1.28481	Upregulated	4	0.511	0.191	1.32185e-35	AT4G07960	Cellulose-synthase-like C12	sp|Q9WX61|BCSA3_KOMXY Cellulose synthase 1 catalytic subunit [UDP-forming] OS=Komagataeibacter xylinus OX=28448 GN=bcsAI PE=3 SV=1
Potra2n8c17200	1.28644	Upregulated	4	0.122	0.043	2.46736e-05	AT2G39950	flocculation protein
Potra2n10c20733	1.28796	Upregulated	4	0.442	0.156	2.84207e-31	AT2G40000	ortholog of sugar beet HS1 PRO-1 2|ATHSPRO2,HSPRO2	sp|Q9LY61|HSPR1_ARATH Nematode resistance protein-like HSPRO1 OS=Arabidopsis thaliana OX=3702 GN=HSPRO1 PE=1 SV=1
Potra2n9c20050	1.2882	Upregulated	4	0.137	0.046	6.65105e-07	AT5G60800	Heavy metal transport/detoxification superfamily protein	sp|Q0WV37|HIP34_ARATH Heavy metal-associated isoprenylated plant protein 34 OS=Arabidopsis thaliana OX=3702 GN=HIPP34 PE=2 SV=1
Potra2n4c8780	1.29071	Upregulated	4	0.102	0.035	0.00025339	AT3G58610	ketol-acid reductoisomerase	sp|Q47UP4|ILVC_COLP3 Ketol-acid reductoisomerase (NADP(+)) OS=Colwellia psychrerythraea (strain 34H / ATCC BAA-681) OX=167879 GN=ilvC PE=3 SV=1
Potra2n9c18721	1.29384	Upregulated	4	0.211	0.074	9.66832e-12	AT2G27350	OTU-like cysteine protease family protein	sp|Q0V869|OTU11_ARATH OVARIAN TUMOR DOMAIN-containing deubiquitinating enzyme 11 OS=Arabidopsis thaliana OX=3702 GN=OTU11 PE=2 SV=1
Potra2n2c5308	1.29607	Upregulated	4	0.493	0.196	6.91712e-32	AT4G37400	cytochrome P450, family 81, subfamily F, polypeptide 3|CYP81F3	sp|H2KYS3|DAF9_CAEEL Cytochrome P450 daf-9 OS=Caenorhabditis elegans OX=6239 GN=daf-9 PE=1 SV=1
Potra2n18c33021	1.29748	Upregulated	4	0.143	0.052	2.27453e-06	AT4G32295	histone acetyltransferase
Potra2n1c322	1.29832	Upregulated	4	0.117	0.047	0.00146683	AT1G16170	ephrin-A3 protein
Potra2n19c33586	1.29905	Upregulated	4	0.129	0.04	3.03198e-07	AT4G22380	Ribosomal protein L7Ae/L30e/S12e/Gadd45 family protein	sp|P32495|NHP2_YEAST H/ACA ribonucleoprotein complex subunit NHP2 OS=Saccharomyces cerevisiae (strain ATCC 204508 / S288c) OX=559292 GN=NHP2 PE=1 SV=2
Potra2n19c33793	1.30159	Upregulated	4	0.292	0.1	9.12456e-19	AT1G71360	Galactose-binding protein	sp|Q710E6|SUCO_RAT SUN domain-containing ossification factor OS=Rattus norvegicus OX=10116 GN=Suco PE=2 SV=1
Potra2n1c631	1.30178	Upregulated	4	0.104	0.036	0.000348019
Potra2n8c17640	1.30501	Upregulated	4	0.573	0.237	7.10019e-38	AT1G68710	ATPase E1-E2 type family protein / haloacid dehalogenase-like hydrolase family protein	sp|O74431|ATC9_SCHPO Probable cation-transporting ATPase C1672.11c OS=Schizosaccharomyces pombe (strain 972 / ATCC 24843) OX=284812 GN=SPCC1672.11c PE=3 SV=1
Potra2n10c21303	1.30935	Upregulated	4	0.511	0.194	5.11792e-35
Potra2n10c21700	1.3112	Upregulated	4	0.161	0.053	2.64534e-09	AT2G32030	Acyl-CoA N-acyltransferases (NAT) superfamily protein	sp|P40586|YIW2_YEAST Uncharacterized protein YIR042C OS=Saccharomyces cerevisiae (strain ATCC 204508 / S288c) OX=559292 GN=YIR042C PE=4 SV=1
Potra2n1c2486	1.3123	Upregulated	4	0.1	0.035	0.000842007	AT5G09590	mitochondrial HSO70 2|HSC70-5,MTHSC70-2	sp|C6DJ80|ZNTB_PECCP Zinc transport protein ZntB OS=Pectobacterium carotovorum subsp. carotovorum (strain PC1) OX=561230 GN=zntB PE=3 SV=1
Potra2n8c17976	1.31711	Upregulated	4	0.1	0.035	0.000883158	AT1G70310	spermidine synthase 2|SPDS2	sp|P97355|SPSY_MOUSE Spermine synthase OS=Mus musculus OX=10090 GN=Sms PE=1 SV=1
Potra2n4c8471	1.31756	Upregulated	4	0.147	0.055	2.19963e-06	AT4G26890	mitogen-activated protein kinase kinase kinase 16|MAPKKK16	sp|Q54FH3|Y1638_DICDI Probable serine/threonine-protein kinase DDB_G0290859 OS=Dictyostelium discoideum OX=44689 GN=DDB_G0290859 PE=3 SV=1
Potra2n6c13356	1.3177	Upregulated	4	0.186	0.06	1.17435e-11	AT2G01490	phytanoyl-CoA dioxygenase (PhyH) family protein	sp|Q5MNH2|LOLE2_EPIUN Dioxygenase lolE2 OS=Epichloe uncinata OX=5050 GN=lolE2 PE=2 SV=1
Potra2n6c14588	1.31901	Upregulated	4	0.138	0.046	2.62985e-07	AT2G28950	expansin A6|ATEXP6,ATEXPA6,ATHEXP ALPHA 1.8,EXPA6	sp|Q7KWS2|EXPL3_DICDI Expansin-like protein 3 OS=Dictyostelium discoideum OX=44689 GN=expl3 PE=2 SV=1
Potra2n8c17739	1.31959	Upregulated	4	0.203	0.071	1.83333e-11	AT1G68490	translocase subunit seca
Potra2n9c20036	1.32104	Upregulated	4	0.12	0.042	2.04992e-05	AT2G28000	chaperonin-60alpha|CH-CPN60A,CPN60A,SLP	sp|Q9V2S9|THSA_SACS2 Thermosome subunit alpha OS=Saccharolobus solfataricus (strain ATCC 35092 / DSM 1617 / JCM 11322 / P2) OX=273057 GN=thsA PE=1 SV=2
Potra2n6c13336	1.32235	Upregulated	4	0.624	0.271	2.93383e-41	AT5G12010	nuclease	sp|Q5U538|HARB1_XENLA Putative nuclease HARBI1 OS=Xenopus laevis OX=8355 GN=harbi1 PE=2 SV=1
Potra2n1c173	1.323	Upregulated	4	0.386	0.141	2.15423e-25	AT2G41540	6-phosphogluconate dehydrogenase family protein|GPDHC1	sp|Q4ZUV7|GPDA_PSEU2 Glycerol-3-phosphate dehydrogenase [NAD(P)+] OS=Pseudomonas syringae pv. syringae (strain B728a) OX=205918 GN=gpsA PE=3 SV=1
Potra2n5c12618	1.32551	Upregulated	4	0.494	0.189	1.91805e-34	AT3G16640	translationally controlled tumor protein|TCTP	sp|Q94587|TCTP_HYDVU Translationally-controlled tumor protein homolog OS=Hydra vulgaris OX=6087 PE=2 SV=1
Potra2n9c18691	1.33303	Upregulated	4	0.659	0.274	2.9868e-50	AT2G27500	Glycosyl hydrolase superfamily protein	sp|P52397|E13J_TOBAC Glucan endo-1,3-beta-glucosidase, acidic isoform PR-O (Fragment) OS=Nicotiana tabacum OX=4097 GN=PR0 PE=1 SV=1
Potra2n1c2010	1.33461	Upregulated	4	0.262	0.094	1.49957e-15	AT3G13510	carboxyl-terminal peptidase, putative (DUF239)
Potra2n6c14907	1.33601	Upregulated	4	0.143	0.045	2.76544e-08	AT4G15550	indole-3-acetate beta-D-glucosyltransferase|IAGLU	sp|Q9LSY5|U71B7_ARATH UDP-glycosyltransferase 71B7 OS=Arabidopsis thaliana OX=3702 GN=UGT71B7 PE=2 SV=2
Potra2n2c4167	1.33776	Upregulated	4	0.104	0.04	0.00243843	AT3G07330	Cellulose-synthase-like C6	sp|Q9WX61|BCSA3_KOMXY Cellulose synthase 1 catalytic subunit [UDP-forming] OS=Komagataeibacter xylinus OX=28448 GN=bcsAI PE=3 SV=1
Potra2n15c29219	1.34423	Upregulated	4	0.371	0.136	6.17553e-24	AT5G24660	response to low sulfur 2|LSU2	sp|Q9SCK2|LSU3_ARATH Protein RESPONSE TO LOW SULFUR 3 OS=Arabidopsis thaliana OX=3702 GN=LSU3 PE=4 SV=1
Potra2n4c9962	1.35658	Upregulated	4	0.204	0.067	6.53993e-13	AT4G38680	glycine rich protein 2|ATCSP2,CSDP2,CSP2,GRP2	sp|P41018|CSPB_SPOGL Cold shock protein CspB (Fragment) OS=Sporosarcina globispora OX=1459 GN=cspB PE=3 SV=1
Potra2n16c29620	1.36011	Upregulated	4	0.29	0.093	1.48989e-20	AT5G04170	Calcium-binding EF-hand family protein	sp|O14815|CAN9_HUMAN Calpain-9 OS=Homo sapiens OX=9606 GN=CAPN9 PE=1 SV=1
Potra2n5c10737	1.36472	Upregulated	4	0.59	0.232	1.83364e-43	AT4G24160	alpha/beta-Hydrolases superfamily protein	sp|P9WNH5|HSAD_MYCTU 4,5:9,10-diseco-3-hydroxy-5,9,17-trioxoandrosta-1(10),2-diene-4-oate hydrolase OS=Mycobacterium tuberculosis (strain ATCC 25618 / H37Rv) OX=83332 GN=hsaD PE=1 SV=1
Potra2n11c22512	1.36607	Upregulated	4	0.409	0.147	1.70667e-27	AT1G64720	Polyketide cyclase/dehydrase and lipid transport superfamily protein|CP5	sp|P53808|PPCT_MOUSE Phosphatidylcholine transfer protein OS=Mus musculus OX=10090 GN=Pctp PE=1 SV=2
Potra2n15c28407	1.3665	Upregulated	4	0.105	0.035	5.95409e-05	AT4G24780	Pectin lyase-like superfamily protein	sp|B1B6T1|PTLY_BACSP Pectate trisaccharide-lyase OS=Bacillus sp. OX=1409 GN=pel PE=1 SV=1
Potra2n1c825	1.37076	Upregulated	4	0.245	0.077	2.26236e-17	AT4G11280	1-aminocyclopropane-1-carboxylic acid (acc) synthase 6|ACS6,ATACS6	sp|P71348|ALAA_HAEIN Glutamate-pyruvate aminotransferase AlaA OS=Haemophilus influenzae (strain ATCC 51907 / DSM 11121 / KW20 / Rd) OX=71421 GN=alaA PE=3 SV=1
Potra2n14c26794	1.37139	Upregulated	4	0.11	0.036	2.7324e-05	AT4G25225	transmembrane protein
Potra2n16c29706	1.38289	Upregulated	4	0.567	0.225	4.89969e-40
Potra2n10c22052	1.38334	Upregulated	4	0.142	0.044	1.13894e-08	AT1G70520	cysteine-rich RLK (RECEPTOR-like protein kinase) 2|CRK2	sp|Q55CW3|SAMKA_DICDI Probable serine/threonine-protein kinase samkA OS=Dictyostelium discoideum OX=44689 GN=samkA PE=3 SV=1
Potra2n13c26142	1.38398	Upregulated	4	0.519	0.203	5.82391e-35	AT1G09070	soybean gene regulated by cold-2|(AT)SRC2,SRC2	sp|O04133|SRC2_SOYBN Protein SRC2 OS=Glycine max OX=3847 GN=SRC2 PE=2 SV=1
Potra2n3c7886	1.39218	Upregulated	4	0.275	0.089	1.02666e-19	AT1G53840	pectin methylesterase 1|ATPME1,PME1	sp|P24791|PME_RALSL Pectinesterase OS=Ralstonia solanacearum OX=305 GN=pme PE=3 SV=1
Potra2n18c32766	1.39343	Upregulated	4	0.435	0.149	1.7631e-32	AT5G12010	nuclease	sp|Q5U538|HARB1_XENLA Putative nuclease HARBI1 OS=Xenopus laevis OX=8355 GN=harbi1 PE=2 SV=1
Potra2n5c10790	1.39432	Upregulated	4	0.152	0.045	2.92601e-10	AT5G66460	Glycosyl hydrolase superfamily protein	sp|Q5B833|MANB_EMENI Mannan endo-1,4-beta-mannosidase B OS=Emericella nidulans (strain FGSC A4 / ATCC 38163 / CBS 112.46 / NRRL 194 / M139) OX=227321 GN=manB PE=1 SV=2
Potra2n8c17104	1.39922	Upregulated	4	0.992	0.737	4.72812e-129	AT5G02500	heat shock cognate protein 70-1|AT-HSC70-1,HSC70,HSC70-1,HSP70-1	sp|P86237|HS71L_MESAU Heat shock 70 kDa protein 1-like (Fragments) OS=Mesocricetus auratus OX=10036 GN=HSPA1L PE=1 SV=1
Potra2n10c20765	1.41417	Upregulated	4	0.796	0.359	3.61137e-68	AT5G05580	fatty acid desaturase 8|FAD8	sp|O34653|DES_BACSU Fatty acid desaturase OS=Bacillus subtilis (strain 168) OX=224308 GN=des PE=2 SV=1
Potra2n1c3184	1.41882	Upregulated	4	0.173	0.053	1.49355e-11	AT5G55480	SHV3-like 1|SVL1	sp|Q9SD81|GDPD6_ARATH Glycerophosphodiester phosphodiesterase GDPD6 OS=Arabidopsis thaliana OX=3702 GN=GDPD6 PE=2 SV=1
Potra2n8c17356	1.41923	Upregulated	4	0.733	0.316	1.15332e-57	AT1G54320	LEM3 (ligand-effect modulator 3) family protein / CDC50 family protein	sp|A0ZT23|CC50C_PANTR Cell cycle control protein 50C OS=Pan troglodytes OX=9598 GN=TMEM30C PE=2 SV=2
Potra2n1c1145	1.41954	Upregulated	4	0.186	0.061	4.71048e-11	AT1G32127	plant viral-response family protein	sp|Q60774|TM45A_MOUSE Transmembrane protein 45A OS=Mus musculus OX=10090 GN=Tmem45a PE=2 SV=1
Potra2n11c22643	1.4228	Upregulated	4	0.196	0.066	6.19051e-12	AT5G54800	glucose 6-phosphate/phosphate translocator 1|ATGPT1,GPT1	sp|Q54YK1|Y8631_DICDI Putative UDP-sugar transporter DDB_G0278631 OS=Dictyostelium discoideum OX=44689 GN=DDB_G0278631 PE=3 SV=2
Potra2n3c7268	1.42765	Upregulated	4	0.486	0.211	5.3394e-30	AT5G53340	Galactosyltransferase family protein	sp|Q91Z92|B3GT6_MOUSE Beta-1,3-galactosyltransferase 6 OS=Mus musculus OX=10090 GN=B3galt6 PE=2 SV=1
Potra2n4c8757	1.42778	Upregulated	4	0.351	0.123	1.55817e-23	AT4G27460	Cystathionine beta-synthase (CBS) family protein	sp|Q8GXI9|PV42B_ARATH SNF1-related protein kinase regulatory subunit gamma-like PV42b OS=Arabidopsis thaliana OX=3702 GN=PV42B PE=2 SV=1
Potra2n1c106	1.43171	Upregulated	4	0.247	0.076	2.28142e-18	AT1G05575	transmembrane protein
Potra2n19c33575	1.43711	Upregulated	4	0.305	0.093	3.47393e-24	AT5G09360	laccase 14|LAC14	sp|I6WZK7|MMCO_MYCTU Multicopper oxidase MmcO OS=Mycobacterium tuberculosis (strain ATCC 25618 / H37Rv) OX=83332 GN=mmcO PE=1 SV=1
Potra2n13c26245	1.44408	Upregulated	4	0.115	0.033	2.59092e-07	AT1G56560	Plant neutral invertase family protein	sp|Q9C560|INVF_ARATH Probable alkaline/neutral invertase F OS=Arabidopsis thaliana OX=3702 GN=INVF PE=2 SV=1
Potra2n13c25570	1.44932	Upregulated	4	0.216	0.066	1.51117e-15
Potra2n1c2023	1.45202	Upregulated	4	0.143	0.045	2.04863e-08	AT1G07870	Protein kinase superfamily protein	sp|Q63132|ROS1_RAT Proto-oncogene tyrosine-protein kinase ROS OS=Rattus norvegicus OX=10116 GN=Ros1 PE=2 SV=1
Potra2n1c3764	1.45408	Upregulated	4	0.362	0.137	1.19872e-23	AT1G64720	Polyketide cyclase/dehydrase and lipid transport superfamily protein|CP5	sp|Q9UKL6|PPCT_HUMAN Phosphatidylcholine transfer protein OS=Homo sapiens OX=9606 GN=PCTP PE=1 SV=1
Potra2n2c5467	1.46339	Upregulated	4	0.264	0.082	1.56271e-19	AT1G09750	Eukaryotic aspartyl protease family protein	sp|A2ZC67|ASP1_ORYSI Aspartic proteinase Asp1 OS=Oryza sativa subsp. indica OX=39946 GN=ASP1 PE=2 SV=2
Potra2n1c2884	1.46639	Upregulated	4	0.119	0.037	1.36138e-06	AT3G03470	cytochrome P450, family 87, subfamily A, polypeptide 9|CYP89A9	sp|Q2MJ20|C7A12_MEDTR Beta-amyrin 28-monooxygenase OS=Medicago truncatula OX=3880 GN=CYP716A12 PE=1 SV=1
Potra2n17c30809	1.47423	Upregulated	4	0.725	0.295	2.96255e-62	AT1G66480	plastid movement impaired 2|PMI2	sp|Q6NLC8|Y1648_ARATH Uncharacterized protein At1g66480 OS=Arabidopsis thaliana OX=3702 GN=At1g66480 PE=2 SV=1
Potra2n5c10711	1.47854	Upregulated	4	0.185	0.056	8.30293e-13	AT5G06300	Putative lysine decarboxylase family protein	sp|B2HS63|LOGH_MYCMM Cytokinin riboside 5'-monophosphate phosphoribohydrolase OS=Mycobacterium marinum (strain ATCC BAA-535 / M) OX=216594 GN=MMAR_4233 PE=1 SV=1
Potra2n6c14936	1.4799	Upregulated	4	0.16	0.051	6.68216e-10	AT3G57520	seed imbibition 2|AtSIP2,SIP2	sp|Q97U94|AGAL_SACS2 Alpha-galactosidase OS=Saccharolobus solfataricus (strain ATCC 35092 / DSM 1617 / JCM 11322 / P2) OX=273057 GN=galS PE=1 SV=2
Potra2n12c24791	1.48319	Upregulated	4	0.244	0.079	7.05501e-17	AT5G62190	DEAD box RNA helicase (PRH75)|PRH75	sp|Q944S1|RH22_ARATH DEAD-box ATP-dependent RNA helicase 22 OS=Arabidopsis thaliana OX=3702 GN=RH22 PE=2 SV=1
Potra2n2c4359	1.49207	Upregulated	4	0.115	0.029	6.69535e-09	AT3G59310	solute carrier family 35 protein (DUF914)	sp|O59785|YCN8_SCHPO Uncharacterized solute carrier family 35 member C320.08 OS=Schizosaccharomyces pombe (strain 972 / ATCC 24843) OX=284812 GN=SPCC320.08 PE=1 SV=1
Potra2n2c5374	1.49974	Upregulated	4	0.124	0.036	6.44445e-08	AT1G58440	FAD/NAD(P)-binding oxidoreductase family protein|SQE1,XF1	sp|Q3S8R0|OXYE_STRRM 6-methylpretetramide 4-monooxygenase OS=Streptomyces rimosus OX=1927 GN=oxyE PE=1 SV=1
Potra2n14c27100	1.5	Upregulated	4	0.776	0.342	3.24839e-70	AT4G01070	UDP-Glycosyltransferase superfamily protein|GT72B1,UGT72B1	sp|Q40286|UFOG4_MANES Anthocyanidin 3-O-glucosyltransferase 4 (Fragment) OS=Manihot esculenta OX=3983 GN=GT4 PE=2 SV=1
Potra2n2c4369	1.50709	Upregulated	4	0.217	0.066	4.81494e-16	AT2G05710	aconitase 3|ACO3	sp|Q5JFV6|LEUC_THEKO 3-isopropylmalate dehydratase large subunit OS=Thermococcus kodakarensis (strain ATCC BAA-918 / JCM 12380 / KOD1) OX=69014 GN=leuC PE=3 SV=1
Potra2n4c8995	1.51282	Upregulated	4	0.143	0.04	4.02456e-10	AT1G29690	MAC/Perforin domain-containing protein|CAD1	sp|Q8L612|MACP1_ARATH MACPF domain-containing protein At1g14780 OS=Arabidopsis thaliana OX=3702 GN=At1g14780 PE=2 SV=1
Potra2n4c9976	1.51322	Upregulated	4	0.946	0.563	2.66667e-110	AT2G17840	Senescence/dehydration-associated protein-like protein|ERD7	sp|Q9SD22|SDEH3_ARATH Senescence/dehydration-associated protein At3g51250 OS=Arabidopsis thaliana OX=3702 GN=At3g51250 PE=2 SV=1
Potra2n10c20597	1.52322	Upregulated	4	0.189	0.051	2.5237e-15	AT2G39518	Uncharacterized protein family (UPF0497)	sp|Q5W6M3|CSPLG_ORYSJ CASP-like protein 4B4 OS=Oryza sativa subsp. japonica OX=39947 GN=Os05g0344400 PE=3 SV=1
Potra2n16c30305	1.52888	Upregulated	4	0.102	0.031	1.89081e-05	AT3G09010	Protein kinase superfamily protein	sp|C0LGI2|Y1677_ARATH Probable LRR receptor-like serine/threonine-protein kinase At1g67720 OS=Arabidopsis thaliana OX=3702 GN=At1g67720 PE=1 SV=1
Potra2n8c18295	1.53263	Upregulated	4	0.117	0.028	1.50515e-09	AT3G27320	alpha/beta-Hydrolases superfamily protein	sp|Q8BM81|ADCL4_MOUSE Arylacetamide deacetylase-like 4 OS=Mus musculus OX=10090 GN=Aadacl4 PE=2 SV=2
Potra2n15c28638	1.54003	Upregulated	4	0.137	0.046	3.04205e-07	AT5G62670	H[+]-ATPase 11|AHA11,HA11	sp|Q8R8I6|KDPB_CALS4 Potassium-transporting ATPase ATP-binding subunit OS=Caldanaerobacter subterraneus subsp. tengcongensis (strain DSM 15242 / JCM 11007 / NBRC 100824 / MB4) OX=273068 GN=kdpB PE=3 SV=1
Potra2n2c5523	1.54136	Upregulated	4	0.526	0.183	7.98628e-45	AT1G78240	S-adenosyl-L-methionine-dependent methyltransferases superfamily protein|OSU1,QUA2,TSD2	sp|Q9LN50|PMTS_ARATH Probable methyltransferase PMT28 OS=Arabidopsis thaliana OX=3702 GN=At1g19430 PE=2 SV=1
Potra2n2c4159	1.55095	Upregulated	4	0.618	0.17	2.52367e-77	AT3G07390	auxin-induced in root cultures-like protein|AIR12	sp|Q8VYH6|B651B_ARATH Cytochrome b561 and DOMON domain-containing protein At4g17280 OS=Arabidopsis thaliana OX=3702 GN=At4g17280 PE=2 SV=1
Potra2n10c21315	1.55767	Upregulated	4	0.104	0.027	2.17647e-07	AT1G68580	Agenet and bromo-adjacent homology (BAH) domain-containing protein	sp|Q9FFA0|DUF10_ARATH DUF724 domain-containing protein 10 OS=Arabidopsis thaliana OX=3702 GN=DUF10 PE=2 SV=1
Potra2n1c3167	1.55983	Upregulated	4	0.17	0.05	4.02442e-12	AT1G30320	Remorin family protein
Potra2n6c14777	1.5706	Upregulated	4	0.356	0.094	2.44844e-35	AT2G31050	Cupredoxin superfamily protein	sp|Q5JNJ5|ENL1_ORYSJ Early nodulin-like protein 1 OS=Oryza sativa subsp. japonica OX=39947 GN=ENODL1 PE=1 SV=1
Potra2n3c7241	1.577	Upregulated	4	0.328	0.099	1.52266e-27
Potra2n8c18231	1.57725	Upregulated	4	0.455	0.142	2.69326e-39	AT3G23920	beta-amylase 1|BAM1,BMY7,TR-BAMY	sp|P30271|AMYB_SECCE Beta-amylase (Fragment) OS=Secale cereale OX=4550 GN=BMY1 PE=2 SV=1
Potra2n5c11188	1.57971	Upregulated	4	0.145	0.041	2.21208e-10	AT4G19950	polyadenylate-binding protein 1-B-binding protein
Potra2n4c8518	1.58048	Upregulated	4	0.868	0.428	2.68074e-85	AT4G04610	APS reductase 1|APR,APR1,ATAPR1,PRH19	sp|Q00216|TIGA_ASPNG Protein disulfide-isomerase tigA OS=Aspergillus niger OX=5061 GN=tigA PE=2 SV=1
Potra2n17c30608	1.58355	Upregulated	4	0.105	0.024	1.41321e-08	AT3G17650	YELLOW STRIPE like 5|PDE321,YSL5	sp|P53134|YGL4_YEAST Putative oligopeptide transporter YGL114W OS=Saccharomyces cerevisiae (strain ATCC 204508 / S288c) OX=559292 GN=YGL114W PE=1 SV=1
Potra2n5c11261	1.58371	Upregulated	4	0.173	0.046	6.7887e-14	AT1G21740	DUF630 family protein, putative (DUF630 and DUF632)	sp|Q9AQW1|REL2_ORYSJ Protein ROLLING AND ERECT LEAF 2 OS=Oryza sativa subsp. japonica OX=39947 GN=REL2 PE=2 SV=1
Potra2n8c17115	1.58468	Upregulated	4	0.98	0.572	5.18446e-132	AT3G55430	O-Glycosyl hydrolases family 17 protein	sp|Q93V72|PDCB4_ARATH PLASMODESMATA CALLOSE-BINDING PROTEIN 4 OS=Arabidopsis thaliana OX=3702 GN=PDCB4 PE=1 SV=1
Potra2n2c4143	1.58497	Upregulated	4	0.325	0.11	4.08623e-24	AT5G48480	Lactoylglutathione lyase / glyoxalase I family protein	sp|Q9LV66|Y5848_ARATH Uncharacterized protein At5g48480 OS=Arabidopsis thaliana OX=3702 GN=At5g48480 PE=1 SV=1
Potra2n11c23330	1.58506	Upregulated	4	0.189	0.049	2.0876e-16	AT3G58610	ketol-acid reductoisomerase	sp|Q97YJ9|ILVC2_SACS2 Putative ketol-acid reductoisomerase 2 OS=Saccharolobus solfataricus (strain ATCC 35092 / DSM 1617 / JCM 11322 / P2) OX=273057 GN=ilvC2 PE=1 SV=1
Potra2n1c496	1.59565	Upregulated	4	0.166	0.043	8.88812e-14	AT1G69040	ACT domain repeat 4|ACR4	sp|B4RC79|GLND_PHEZH Bifunctional uridylyltransferase/uridylyl-removing enzyme OS=Phenylobacterium zucineum (strain HLK1) OX=450851 GN=glnD PE=3 SV=1
Potra2n1c70	1.59694	Upregulated	4	0.199	0.062	1.00004e-13	AT2G20142	Toll-Interleukin-Resistance (TIR) domain family protein
Potra2n5c10624	1.60195	Upregulated	4	0.17	0.048	7.05826e-13	AT5G11880	Pyridoxal-dependent decarboxylase family protein	sp|Q92445|DCOR_PARBR Ornithine decarboxylase (Fragment) OS=Paracoccidioides brasiliensis OX=121759 GN=ODC PE=3 SV=1
Potra2n13c25024	1.60952	Upregulated	4	0.941	0.547	5.47393e-113	AT4G27280	Calcium-binding EF-hand family protein	sp|Q8S1Y9|CML1_ORYSJ Calmodulin-like protein 1 OS=Oryza sativa subsp. japonica OX=39947 GN=CML1 PE=2 SV=1
Potra2n6c15338	1.61682	Upregulated	4	0.11	0.026	5.73667e-09	AT4G16370	oligopeptide transporter|ATOPT3,OPT3	sp|Q7LL00|YQJC_SCHPO Uncharacterized oligopeptide transporter C1840.12 OS=Schizosaccharomyces pombe (strain 972 / ATCC 24843) OX=284812 GN=SPCC1840.12 PE=3 SV=2
Potra2n689s36477	1.61786	Upregulated	4	0.652	0.261	8.01468e-57
Potra2n15c28122	1.62104	Upregulated	4	0.573	0.191	1.93734e-53	AT5G62350	Plant invertase/pectin methylesterase inhibitor superfamily protein	sp|Q8GX86|PME21_ARATH Probable pectinesterase/pectinesterase inhibitor 21 OS=Arabidopsis thaliana OX=3702 GN=PME21 PE=2 SV=2
Potra2n18c32973	1.62877	Upregulated	4	0.292	0.093	4.91716e-22	AT2G26640	3-ketoacyl-CoA synthase 11|KCS11	sp|P48391|2PS_GERHY 2-pyrone synthase OS=Gerbera hybrida OX=18101 GN=2PS PE=1 SV=2
Potra2n15c28938	1.63166	Upregulated	4	0.325	0.101	7.73478e-27	AT5G37490	ARM repeat superfamily protein	sp|Q5UQ40|UBC4_MIMIV Probable bifunctional E2/E3 enzyme R795 OS=Acanthamoeba polyphaga mimivirus OX=212035 GN=MIMI_R795 PE=3 SV=1
Potra2n15c29099	1.64249	Upregulated	4	0.308	0.097	1.46055e-24	AT3G49220	Plant invertase/pectin methylesterase inhibitor superfamily	sp|Q9SB38|PMEI4_ARATH Pectinesterase inhibitor 4 OS=Arabidopsis thaliana OX=3702 GN=PMEI4 PE=2 SV=1
Potra2n6c14878	1.64433	Upregulated	4	0.145	0.036	5.64479e-12	AT5G06860	polygalacturonase inhibiting protein 1|ATPGIP1,PGIP1	sp|Q9XIB6|PLRX2_ARATH Pollen-specific leucine-rich repeat extensin-like protein 2 OS=Arabidopsis thaliana OX=3702 GN=PEX2 PE=1 SV=1
Potra2n5c12437	1.64868	Upregulated	4	0.222	0.063	4.71204e-18	AT1G08720	Protein kinase superfamily protein	sp|Q9LFA2|KIPK1_ARATH Serine/threonine-protein kinase KIPK1 OS=Arabidopsis thaliana OX=3702 GN=KIPK1 PE=1 SV=1
Potra2n17c31424	1.65081	Upregulated	4	0.11	0.02	1.2337e-11	AT4G14010	ralf-like 32|RALFL32	sp|O23262|RLF32_ARATH Protein RALF-like 32 OS=Arabidopsis thaliana OX=3702 GN=RALFL32 PE=3 SV=1
Potra2n7c16022	1.65377	Upregulated	4	0.102	0.026	2.98252e-07	AT1G48920	nucleolin like 1|ATNUC-L1,NUC-L1,PARL1	sp|P42696|RBM34_HUMAN RNA-binding protein 34 OS=Homo sapiens OX=9606 GN=RBM34 PE=1 SV=2
Potra2n9c19920	1.65996	Upregulated	4	0.117	0.028	1.12014e-09	AT2G31955	cofactor of nitrate reductase and xanthine dehydrogenase 2|CNX2	sp|Q6N8F3|PQQE_RHOPA PqqA peptide cyclase OS=Rhodopseudomonas palustris (strain ATCC BAA-98 / CGA009) OX=258594 GN=pqqE PE=3 SV=1
Potra2n4c9298	1.6653	Upregulated	4	0.133	0.034	8.9137e-11	AT2G47485	hypothetical protein
Potra2n10c21463	1.66808	Upregulated	4	0.142	0.039	1.56282e-10	AT2G01480	O-fucosyltransferase family protein	sp|K7R4D4|MSR_TRIFG Protein MANNAN SYNTHESIS-RELATED OS=Trigonella foenum-graecum OX=78534 GN=MSR PE=2 SV=1
Potra2n10c22118	1.66968	Upregulated	4	0.474	0.143	1.7362e-44	AT1G10370	Glutathione S-transferase family protein|ATGSTU17,ERD9,GST30,GST30B	sp|Q9VHD3|MAAI1_DROME Probable maleylacetoacetate isomerase 1 OS=Drosophila melanogaster OX=7227 GN=GstZ1 PE=1 SV=1
Potra2n4c9491	1.67114	Upregulated	4	0.181	0.053	1.28997e-13	AT3G01090	SNF1 kinase homolog 10|AKIN10,KIN10,SNRK1.1	sp|Q9M0E5|VPS15_ARATH Serine/threonine-protein kinase VPS15 OS=Arabidopsis thaliana OX=3702 GN=VPS15 PE=1 SV=1
Potra2n6c13590	1.67189	Upregulated	4	0.293	0.089	6.08428e-24	AT4G37980	cinnamyl alcohol dehydrogenase 7|ATCAD7,CAD7,ELI3,ELI3-1	sp|A7RK30|QORL2_NEMVE Quinone oxidoreductase-like protein 2 homolog OS=Nematostella vectensis OX=45351 GN=v1g238856 PE=3 SV=1
Potra2n18c32145	1.67423	Upregulated	4	0.501	0.168	5.93857e-44	AT2G31050	Cupredoxin superfamily protein	sp|Q9T076|ENL2_ARATH Early nodulin-like protein 2 OS=Arabidopsis thaliana OX=3702 GN=At4g27520 PE=1 SV=1
Potra2n11c22450	1.67484	Upregulated	4	0.316	0.089	2.11808e-28	AT2G34790	FAD-binding Berberine family protein|EDA28,MEE23	sp|P30986|RETO_ESCCA Reticuline oxidase OS=Eschscholzia californica OX=3467 GN=BBE1 PE=1 SV=1
Potra2n14c26477	1.67693	Upregulated	4	0.15	0.04	6.41099e-12	AT4G37360	cytochrome P450, family 81, subfamily D, polypeptide 2|CYP81D2	sp|A1CLZ3|CCSG_ASPCL Cytochrome P450 monooxygenase ccsG OS=Aspergillus clavatus (strain ATCC 1007 / CBS 513.65 / DSM 816 / NCTC 3887 / NRRL 1) OX=344612 GN=ccsG PE=3 SV=1
Potra2n3c7061	1.68593	Upregulated	4	0.371	0.1	6.14729e-36	AT5G47910	respiratory burst oxidase homologue D|ATRBOHD,RBOHD	sp|O94727|FRP2_SCHPO Ferric/cupric reductase transmembrane component 2 OS=Schizosaccharomyces pombe (strain 972 / ATCC 24843) OX=284812 GN=frp2 PE=3 SV=1
Potra2n8c17924	1.69161	Upregulated	4	0.27	0.073	8.81013e-24	AT2G37870	Bifunctional inhibitor/lipid-transfer protein/seed storage 2S albumin superfamily protein
Potra2n13c25763	1.69198	Upregulated	4	0.222	0.057	2.65531e-20	AT1G64760	O-Glycosyl hydrolases family 17 protein	sp|P43070|BGL2_CANAX Glucan 1,3-beta-glucosidase OS=Candida albicans OX=5476 GN=BGL2 PE=3 SV=1
Potra2n10c22051	1.6952	Upregulated	4	0.14	0.038	1.93209e-10	AT1G70530	cysteine-rich RLK (RECEPTOR-like protein kinase) 3	sp|Q6R2K2|SRF4_ARATH Protein STRUBBELIG-RECEPTOR FAMILY 4 OS=Arabidopsis thaliana OX=3702 GN=SRF4 PE=2 SV=1
Potra2n2c4453	1.69894	Upregulated	4	0.122	0.034	1.98746e-08	AT3G21630	chitin elicitor receptor kinase 1|CERK1,LYSM RLK1	sp|P17948|VGFR1_HUMAN Vascular endothelial growth factor receptor 1 OS=Homo sapiens OX=9606 GN=FLT1 PE=1 SV=2
Potra2n7c16279	1.70326	Upregulated	4	0.133	0.03	2.74721e-12	AT4G37030	membrane protein	sp|Q8GUM4|Y3739_ARATH Uncharacterized membrane protein At3g27390 OS=Arabidopsis thaliana OX=3702 GN=At3g27390 PE=1 SV=2
Potra2n8c18093	1.70858	Upregulated	4	0.45	0.126	1.56833e-45	AT3G22910	ATPase E1-E2 type family protein / haloacid dehalogenase-like hydrolase family protein	sp|Q9N0Z4|AT11B_RABIT Probable phospholipid-transporting ATPase IF (Fragment) OS=Oryctolagus cuniculus OX=9986 GN=ATP11B PE=1 SV=2
Potra2n17c31209	1.71999	Upregulated	4	0.105	0.024	1.16187e-08	AT5G39785	hypothetical protein (DUF1666)
Potra2n15c28973	1.7317	Upregulated	4	0.155	0.039	2.94519e-13	AT4G28000	P-loop containing nucleoside triphosphate hydrolases superfamily protein	sp|P09975|YCF2_MARPO Protein Ycf2 OS=Marchantia polymorpha OX=3197 GN=ycf2 PE=3 SV=1
Potra2n10c20448	1.73293	Upregulated	4	0.119	0.028	5.16632e-10	AT1G50490	ubiquitin-conjugating enzyme 20|UBC20	sp|Q55EY8|UBE2W_DICDI Probable ubiquitin-conjugating enzyme E2 W OS=Dictyostelium discoideum OX=44689 GN=ube2w PE=3 SV=1
Potra2n4c9969	1.73462	Upregulated	4	0.213	0.057	5.16218e-18	AT4G38650	Glycosyl hydrolase family 10 protein	sp|Q01176|XYN2_MAGGR Endo-1,4-beta-xylanase 2 OS=Magnaporthe grisea OX=148305 GN=XYL2 PE=1 SV=1
Potra2n2c4494	1.73529	Upregulated	4	0.985	0.599	4.02332e-142	AT5G35735	Auxin-responsive family protein	sp|A2VE04|FRRS1_BOVIN Ferric-chelate reductase 1 OS=Bos taurus OX=9913 GN=FRRS1 PE=2 SV=1
Potra2n15c28419	1.73875	Upregulated	4	0.129	0.031	8.84831e-11	AT2G31880	Leucine-rich repeat protein kinase family protein|EVR,SOBIR1	sp|Q559T8|Y0701_DICDI Probable serine/threonine-protein kinase DDB_G0272282 OS=Dictyostelium discoideum OX=44689 GN=DDB_G0272282 PE=3 SV=1
Potra2n13c25312	1.76438	Upregulated	4	0.16	0.041	2.3051e-13
Potra2n1c3106	1.77572	Upregulated	4	0.145	0.033	1.81523e-13
Potra2n5c10921	1.77913	Upregulated	4	0.206	0.049	4.48403e-20	AT3G22930	calmodulin-like 11	sp|Q54IY3|CETNA_DICDI Centrin-A OS=Dictyostelium discoideum OX=44689 GN=cenA PE=3 SV=1
Potra2n5c11107	1.77919	Upregulated	4	0.82	0.34	1.59473e-92	AT1G71695	Peroxidase superfamily protein	sp|Q6ZJJ1|APX4_ORYSJ Probable L-ascorbate peroxidase 4, peroxisomal OS=Oryza sativa subsp. japonica OX=39947 GN=APX4 PE=2 SV=1
Potra2n2c6336	1.80362	Upregulated	4	0.643	0.215	6.44204e-68
Potra2n5c10874	1.80713	Upregulated	4	0.875	0.353	5.73819e-108	AT5G63450	cytochrome P450, family 94, subfamily B, polypeptide 1|CYP94B1	sp|D5JBX0|GAO_HELAN Germacrene A hydroxylase OS=Helianthus annuus OX=4232 GN=GAO PE=1 SV=1
Potra2n12c24758	1.80754	Upregulated	4	0.684	0.214	9.49418e-81	AT5G62350	Plant invertase/pectin methylesterase inhibitor superfamily protein	sp|Q9LXK7|PME32_ARATH Probable pectinesterase/pectinesterase inhibitor 32 OS=Arabidopsis thaliana OX=3702 GN=PME32 PE=2 SV=1
Potra2n1c3303	1.82813	Upregulated	4	0.677	0.213	1.08123e-77	AT1G78440	gibberellin 2-beta-dioxygenase|ATGA2OX1,GA2OX1	sp|P10621|IPNS_STRCL Isopenicillin N synthase OS=Streptomyces clavuligerus OX=1901 GN=pcbC PE=3 SV=1
Potra2n10c21739	1.83599	Upregulated	4	0.229	0.061	1.46947e-20	AT3G22910	ATPase E1-E2 type family protein / haloacid dehalogenase-like hydrolase family protein	sp|P32660|ATC5_YEAST Phospholipid-transporting ATPase DNF1 OS=Saccharomyces cerevisiae (strain ATCC 204508 / S288c) OX=559292 GN=DNF1 PE=1 SV=2
Potra2n14c27241	1.83667	Upregulated	4	0.115	0.024	8.40506e-11	AT4G01700	Chitinase family protein	sp|Q06015|CHI3_ARAHY Endochitinase 3 (Fragment) OS=Arachis hypogaea OX=3818 PE=2 SV=1
Potra2n17c31530	1.87642	Upregulated	4	0.115	0.025	1.7388e-10	AT5G64290	dicarboxylate transport 2.1|DCT,DIT2.1	sp|C0LGQ4|MDIS2_ARATH Protein MALE DISCOVERER 2 OS=Arabidopsis thaliana OX=3702 GN=MDIS2 PE=1 SV=1
Potra2n6c14997	1.88859	Upregulated	4	0.171	0.037	1.07816e-17	AT5G04170	Calcium-binding EF-hand family protein	sp|O14815|CAN9_HUMAN Calpain-9 OS=Homo sapiens OX=9606 GN=CAPN9 PE=1 SV=1
Potra2n14c27704	1.89087	Upregulated	4	0.529	0.15	3.89288e-58	AT5G14780	formate dehydrogenase	sp|P53100|YGT5_YEAST Putative 2-hydroxyacid dehydrogenase YGL185C OS=Saccharomyces cerevisiae (strain ATCC 204508 / S288c) OX=559292 GN=YGL185C PE=1 SV=1
Potra2n12c23995	1.92441	Upregulated	4	0.191	0.043	1.34653e-19	AT5G24090	chitinase A|ATCHIA,CHIA	sp|P23473|CHLY_PARTH Bifunctional chitinase/lysozyme (Fragment) OS=Parthenocissus quinquefolia OX=3607 PE=1 SV=1
Potra2n7c15864	1.92509	Upregulated	4	0.336	0.097	5.22029e-32	AT5G10350	RNA-binding (RRM/RBD/RNP motifs) family protein	sp|P42696|RBM34_HUMAN RNA-binding protein 34 OS=Homo sapiens OX=9606 GN=RBM34 PE=1 SV=2
Potra2n7c15751	1.93302	Upregulated	4	0.283	0.07	8.8252e-30	AT5G09760	Plant invertase/pectin methylesterase inhibitor superfamily	sp|O81415|PME39_ARATH Probable pectinesterase/pectinesterase inhibitor 39 OS=Arabidopsis thaliana OX=3702 GN=PME39 PE=2 SV=1
Potra2n16c29368	1.93355	Upregulated	4	0.196	0.049	1.8836e-18	AT3G22142	Bifunctional inhibitor/lipid-transfer protein/seed storage 2S albumin superfamily protein	sp|Q9ZSP6|AIR1L_ARATH Putative lipid-binding protein AIR1B OS=Arabidopsis thaliana OX=3702 GN=AIR1B PE=3 SV=1
Potra2n14c26369	2.00284	Upregulated	4	0.377	0.077	3.34252e-48	AT3G49780	phytosulfokine 4 precursor|ATPSK3 (FORMER SYMBOL),ATPSK4,PSK4	sp|Q9SZG4|PSK4_ARATH Putative phytosulfokines 4 OS=Arabidopsis thaliana OX=3702 GN=PSK4 PE=3 SV=1
Potra2n1c1147	2.00838	Upregulated	4	0.114	0.024	1.37309e-10	AT2G15480	UDP-glucosyl transferase 73B5|UGT73B5	sp|Q9SY84|U90A2_ARATH UDP-glycosyltransferase 90A2 OS=Arabidopsis thaliana OX=3702 GN=UGT90A2 PE=2 SV=1
Potra2n1c1729	2.01972	Upregulated	4	0.145	0.033	6.42227e-14	AT1G72810	Pyridoxal-5'-phosphate-dependent enzyme family protein	sp|P09123|THRC_BACSL Threonine synthase OS=Bacillus sp. (strain ULM1) OX=231717 GN=thrC PE=3 SV=1
Potra2n4c9970	2.10719	Upregulated	4	0.43	0.093	5.71939e-55	AT2G16660	Major facilitator superfamily protein	sp|F4I9E1|NFD4_ARATH Protein NUCLEAR FUSION DEFECTIVE 4 OS=Arabidopsis thaliana OX=3702 GN=NFD4 PE=3 SV=1
Potra2n14c27675	2.11647	Upregulated	4	0.171	0.035	2.88504e-19	AT2G05790	O-Glycosyl hydrolases family 17 protein	sp|Q93V72|PDCB4_ARATH PLASMODESMATA CALLOSE-BINDING PROTEIN 4 OS=Arabidopsis thaliana OX=3702 GN=PDCB4 PE=1 SV=1
Potra2n15c28621	2.11868	Upregulated	4	0.104	0.019	4.0898e-11	AT5G62620	Galactosyltransferase family protein	sp|Q24157|BRN_DROME Beta-1,3-galactosyltransferase brn OS=Drosophila melanogaster OX=7227 GN=brn PE=2 SV=2
Potra2n8c17392	2.12443	Upregulated	4	0.17	0.022	2.0742e-25	AT2G02990	ribonuclease 1|ATRNS1,RNS1	sp|P24657|RNTR_HYPRU Ribonuclease Trv OS=Hypocrea rufa OX=5547 PE=1 SV=1
Potra2n8c18265	2.18227	Upregulated	4	0.115	0.021	1.6744e-12	AT1G24330	ARM repeat superfamily protein	sp|Q757R0|VAC8_ASHGO Vacuolar protein 8 OS=Ashbya gossypii (strain ATCC 10895 / CBS 109.51 / FGSC 9923 / NRRL Y-1056) OX=284811 GN=VAC8 PE=3 SV=3
Potra2n8c18092	2.18712	Upregulated	4	0.343	0.064	6.66659e-46	AT3G22890	ATP sulfurylase 1|APS1	sp|Q54506|SAT_RIFPS Sulfate adenylyltransferase OS=Riftia pachyptila sulfur-oxidizing endosymbiont OX=35843 GN=sat PE=1 SV=1
Potra2n5c11356	2.19937	Upregulated	4	0.675	0.168	2.93939e-96	AT4G08685	Pollen Ole e 1 allergen and extensin family protein|SAH7	sp|O82015|LIGV1_LIGVU Major pollen allergen Lig v 1 OS=Ligustrum vulgare OX=13597 PE=1 SV=2
Potra2n6c13327	2.25332	Upregulated	4	0.328	0.061	5.46477e-44	AT4G33050	calmodulin-binding family protein|EDA39	sp|Q9LFA4|IQM3_ARATH IQ domain-containing protein IQM3 OS=Arabidopsis thaliana OX=3702 GN=IQM3 PE=2 SV=1
Potra2n6c12893	2.3841	Upregulated	4	0.165	0.029	5.37412e-20	AT2G24520	plasma membrane H+-ATPase	sp|Q8YPE9|KDPB1_NOSS1 Potassium-transporting ATPase ATP-binding subunit 1 OS=Nostoc sp. (strain PCC 7120 / SAG 25.82 / UTEX 2576) OX=103690 GN=kdpB1 PE=3 SV=1
Potra2n6c14477	2.52435	Upregulated	4	0.135	0.014	2.05744e-21	AT2G38120	Transmembrane amino acid transporter family protein	sp|F4HW02|GAT1_ARATH GABA transporter 1 OS=Arabidopsis thaliana OX=3702 GN=GAT1 PE=1 SV=1
Potra2n1c831	2.5277	Upregulated	4	0.273	0.043	2.84259e-40	AT4G23500	Pectin lyase-like superfamily protein	sp|Q12554|PGLRC_ASPNG Probable endopolygalacturonase C OS=Aspergillus niger OX=5061 GN=pgaC PE=3 SV=1
Potra2n1c796	2.5449	Upregulated	4	0.379	0.072	3.60555e-54	AT5G41670	6-phosphogluconate dehydrogenase family protein	sp|Q55702|Y229_SYNY3 Uncharacterized oxidoreductase slr0229 OS=Synechocystis sp. (strain PCC 6803 / Kazusa) OX=1111708 GN=slr0229 PE=3 SV=1
Potra2n4c9465	2.57097	Upregulated	4	0.367	0.064	2.63641e-54	AT3G47520	malate dehydrogenase|MDH	sp|C0MFB5|LDH_STRS7 L-lactate dehydrogenase OS=Streptococcus equi subsp. zooepidemicus (strain H70) OX=553483 GN=ldh PE=3 SV=1
Potra2n5c11037	2.5895	Upregulated	4	0.145	0.02	1.97185e-20	AT3G59090	tobamovirus multiplication protein
Potra2n5c12621	2.66082	Upregulated	4	0.992	0.502	5.6467e-226	AT5G27760	Hypoxia-responsive family protein
Potra2n6c12957	2.66257	Upregulated	4	0.112	0.017	3.40392e-14	AT4G31860	Protein phosphatase 2C family protein	sp|Q9WTR8|PHLP1_RAT PH domain leucine-rich repeat protein phosphatase 1 OS=Rattus norvegicus OX=10116 GN=Phlpp1 PE=1 SV=1
Potra2n1c3259	2.74882	Upregulated	4	0.794	0.2	2.08082e-147	AT4G05390	root FNR 1|ATRFNR1,RFNR1	sp|Q6NRG5|NDOR1_XENLA NADPH-dependent diflavin oxidoreductase 1 OS=Xenopus laevis OX=8355 GN=ndor1 PE=2 SV=1
Potra2n15c27988	2.81792	Upregulated	4	0.371	0.054	1.87653e-61	AT5G23760	Copper transport protein family	sp|O03982|HIP39_ARATH Heavy metal-associated isoprenylated plant protein 39 OS=Arabidopsis thaliana OX=3702 GN=HIPP39 PE=2 SV=1
Potra2n1c827	2.85797	Upregulated	4	0.521	0.079	2.49351e-94	AT1G63940	monodehydroascorbate reductase 6|MDAR6	sp|Q5NVA2|TRXR1_PONAB Thioredoxin reductase 1, cytoplasmic OS=Pongo abelii OX=9601 GN=TXNRD1 PE=2 SV=3
Potra2n3c6974	2.93546	Upregulated	4	0.188	0.027	1.13638e-27	AT5G13110	glucose-6-phosphate dehydrogenase 2|G6PD2	sp|Q24625|G6PD_DROSI Glucose-6-phosphate 1-dehydrogenase (Fragment) OS=Drosophila simulans OX=7240 GN=Zw PE=2 SV=1
Potra2n2c4957	2.93605	Upregulated	4	0.498	0.077	1.28112e-87	AT5G41340	ubiquitin conjugating enzyme 4|ATUBC4,UBC4	sp|O00102|UBC7_SCHPO Ubiquitin-conjugating enzyme E2-18 kDa OS=Schizosaccharomyces pombe (strain 972 / ATCC 24843) OX=284812 GN=ubc7 PE=1 SV=2
Potra2n15c28993	2.96795	Upregulated	4	0.138	0.016	1.72919e-21	AT5G24090	chitinase A|ATCHIA,CHIA	sp|D4AT07|CHI1_ARTBC Probable endochitinase ARB_07371 OS=Arthroderma benhamiae (strain ATCC MYA-4681 / CBS 112371) OX=663331 GN=ARB_07371 PE=3 SV=1
Potra2n1c494	3.0312	Upregulated	4	0.59	0.098	2.59319e-110	AT5G13110	glucose-6-phosphate dehydrogenase 2|G6PD2	sp|Q24625|G6PD_DROSI Glucose-6-phosphate 1-dehydrogenase (Fragment) OS=Drosophila simulans OX=7240 GN=Zw PE=2 SV=1
Potra2n1c3307	3.27189	Upregulated	4	0.125	0.01	5.85314e-22	AT1G17110	ubiquitin-specific protease 15	sp|Q8BW70|UBP38_MOUSE Ubiquitin carboxyl-terminal hydrolase 38 OS=Mus musculus OX=10090 GN=Usp38 PE=1 SV=2
Potra2n4c9589	3.34575	Upregulated	4	0.102	0.012	4.90846e-15	AT4G39730	Lipase/lipooxygenase, PLAT/LH2 family protein	sp|Q2V2V3|PLAT3_ARATH PLAT domain-containing protein 3 OS=Arabidopsis thaliana OX=3702 GN=PLAT3 PE=4 SV=1
Potra2n2c6137	3.39859	Upregulated	4	0.442	0.054	1.7239e-86	AT1G19600	pfkB-like carbohydrate kinase family protein	sp|Q93Z01|MIK_ARATH Inositol 3-kinase OS=Arabidopsis thaliana OX=3702 GN=At5g58730 PE=2 SV=1
Potra2n700s36526	3.45043	Upregulated	4	0.367	0.03	1.14531e-76	AT5G40850	urophorphyrin methylase 1	sp|P21639|COBI_SINSX Precorrin-2 C(20)-methyltransferase OS=Sinorhizobium sp. OX=42445 GN=cobI PE=1 SV=2
Potra2n14c27006	3.60474	Upregulated	4	0.941	0.172	4.32217e-242	AT3G61440	cysteine synthase C1|ARATH;BSAS3;1,ATCYSC1,CYSC1	sp|Q2YY67|TDCB_STAAB L-threonine dehydratase catabolic TdcB OS=Staphylococcus aureus (strain bovine RF122 / ET3-1) OX=273036 GN=tdcB PE=3 SV=2
Potra2n9c18689	3.81087	Upregulated	4	0.954	0.201	2.12903e-254	AT2G27510	ferredoxin 3|ATFD3,FD3	sp|P23101|XYLZ_PSEPU Toluate 1,2-dioxygenase electron transfer component OS=Pseudomonas putida OX=303 GN=xylZ PE=3 SV=1
Potra2n5c11357	3.90157	Upregulated	4	0.155	0.008	1.25887e-31	AT1G22170	Phosphoglycerate mutase family protein	sp|F4KI56|SERCL_ARATH Metal-independent phosphoserine phosphatase OS=Arabidopsis thaliana OX=3702 GN=IPSP PE=1 SV=1
Potra2n9c19486	3.93651	Upregulated	4	0.109	0.007	3.13067e-20	AT3G52140	tetratricopeptide repeat (TPR)-containing protein	sp|Q7Z494|NPHP3_HUMAN Nephrocystin-3 OS=Homo sapiens OX=9606 GN=NPHP3 PE=1 SV=1
Potra2n10c21425	4.01855	Upregulated	4	0.132	0.008	7.30034e-26	AT2G01300	mediator of RNA polymerase II transcription subunit
Potra2n3c7270	4.02846	Upregulated	4	0.583	0.052	1.04849e-137	AT5G41670	6-phosphogluconate dehydrogenase family protein	sp|Q55702|Y229_SYNY3 Uncharacterized oxidoreductase slr0229 OS=Synechocystis sp. (strain PCC 6803 / Kazusa) OX=1111708 GN=slr0229 PE=3 SV=1
Potra2n4c10189	4.32169	Upregulated	4	0.904	0.126	2.6849e-250	AT2G27510	ferredoxin 3|ATFD3,FD3	sp|P23101|XYLZ_PSEPU Toluate 1,2-dioxygenase electron transfer component OS=Pseudomonas putida OX=303 GN=xylZ PE=3 SV=1
Potra2n6c14450	4.88419	Upregulated	4	0.1	0.003	5.3584e-21	AT5G05600	2-oxoglutarate (2OG) and Fe(II)-dependent oxygenase superfamily protein	sp|A0A4P8GG75|EUPC_PHOSX 2-oxoglutarate-dependent dioxygenase eupC OS=Phoma sp. OX=1707701 GN=eupC PE=1 SV=1
Potra2n9c19145	5.73587	Upregulated	4	0.643	0.018	1.76962e-188	AT2G16070	plastid division2|PDV2	sp|Q9FK13|PDV1_ARATH Plastid division protein PDV1 OS=Arabidopsis thaliana OX=3702 GN=PDV1 PE=1 SV=1
Potra2n9c19175	6.07648	Upregulated	4	0.173	0.003	1.26561e-41
Potra2n3c6620	-1.33145	Downregulated	5	0.383	0.609	2.96496e-21	AT1G51200	A20/AN1-like zinc finger family protein	sp|Q9H8U3|ZFAN3_HUMAN AN1-type zinc finger protein 3 OS=Homo sapiens OX=9606 GN=ZFAND3 PE=1 SV=1	A20-like
Potra2n18c33011	-1.85601	Downregulated	5	0.182	0.392	1.2838e-14	AT5G11190	Integrase-type DNA-binding superfamily protein|SHN3	sp|Q6X5Y6|WRI1_ARATH Ethylene-responsive transcription factor WRI1 OS=Arabidopsis thaliana OX=3702 GN=WRI1 PE=1 SV=1	AP2-EREBP
Potra2n11c22843	1.05998	Upregulated	5	0.767	0.465	1.21289e-27	AT3G15210	ethylene responsive element binding factor 4|ATERF-4,ATERF4,ERF4,RAP2.5	sp|Q6J1A5|DRE1D_ORYSJ Dehydration-responsive element-binding protein 1D OS=Oryza sativa subsp. japonica OX=39947 GN=DREB1D PE=2 SV=1	AP2-EREBP
Potra2n2c4582	1.08263	Upregulated	5	0.614	0.307	5.48186e-24	AT3G16770	ethylene-responsive element binding protein|ATEBP,EBP,ERF72,RAP2.3	sp|Q9ZWM9|RAV1_ARATH AP2/ERF and B3 domain-containing transcription factor RAV1 OS=Arabidopsis thaliana OX=3702 GN=RAV1 PE=1 SV=1	AP2-EREBP
Potra2n17c31814	1.10185	Upregulated	5	0.594	0.308	1.16082e-22	AT3G15210	ethylene responsive element binding factor 4|ATERF-4,ATERF4,ERF4,RAP2.5	sp|Q7G1L2|RAP26_ARATH Ethylene-responsive transcription factor RAP2-6 OS=Arabidopsis thaliana OX=3702 GN=RAP2-6 PE=2 SV=2	AP2-EREBP
Potra2n1c766	1.11069	Upregulated	5	0.166	0.063	7.72431e-06	AT1G64380	Integrase-type DNA-binding superfamily protein	sp|Q9M9B2|EF117_ARATH Ethylene-responsive transcription factor ERF117 OS=Arabidopsis thaliana OX=3702 GN=ERF117 PE=2 SV=1	AP2-EREBP
Potra2n13c25445	1.26166	Upregulated	5	0.587	0.282	1.61576e-27	AT1G71520	Integrase-type DNA-binding superfamily protein	sp|O49515|ERF91_ARATH Ethylene-responsive transcription factor ERF091 OS=Arabidopsis thaliana OX=3702 GN=ERF091 PE=1 SV=1	AP2-EREBP
Potra2n7c16270	1.28578	Upregulated	5	0.383	0.163	1.0346e-16				AP2-EREBP
Potra2n10c20485	1.55071	Upregulated	5	0.143	0.047	9.06084e-07	AT2G28550	related to AP2.7|RAP2.7,TOE1	sp|Q8W3M3|RAP29_ARATH Ethylene-responsive transcription factor RAP2-9 OS=Arabidopsis thaliana OX=3702 GN=RAP2-9 PE=2 SV=1	AP2-EREBP
Potra2n15c29002	1.67077	Upregulated	5	0.106	0.029	5.76955e-06	AT4G27950	cytokinin response factor 4|CRF4	sp|Q8H443|AP23_ORYSJ APETALA2-like protein 3 OS=Oryza sativa subsp. japonica OX=39947 GN=AP2-3 PE=1 SV=1	AP2-EREBP
Potra2n5c12062	1.75221	Upregulated	5	0.845	0.432	2.37078e-71	AT5G64750	Integrase-type DNA-binding superfamily protein|ABR1	sp|Q84TB5|AP22_ORYSJ APETALA2-like protein 2 OS=Oryza sativa subsp. japonica OX=39947 GN=AP2-2 PE=1 SV=1	AP2-EREBP
Potra2n13c25901	1.86028	Upregulated	5	0.145	0.036	6.41326e-11	AT3G23240	ethylene response factor 1|ATERF1,ERF1	sp|Q9FGC9|EF121_ARATH Putative ethylene-responsive transcription factor ERF121 OS=Arabidopsis thaliana OX=3702 GN=ERF121 PE=3 SV=1	AP2-EREBP
Potra2n5c11113	1.90094	Upregulated	5	0.3	0.071	1.04569e-28	AT5G50080	ethylene response factor 110|ERF110	sp|Q2TQ34|AP21_ORYSJ APETALA2-like protein 1 OS=Oryza sativa subsp. japonica OX=39947 GN=AP2-1 PE=1 SV=1	AP2-EREBP
Potra2n10c20471	1.14832	Upregulated	5	0.115	0.043	0.00304415	AT1G07900	LOB domain-containing protein 1|LBD1	sp|Q9FN11|LBD37_ARATH LOB domain-containing protein 37 OS=Arabidopsis thaliana OX=3702 GN=LBD37 PE=2 SV=1	AS2-LOB
Potra2n6c13057	-1.59732	Downregulated	5	0.335	0.524	6.16814e-13	AT4G32280	indole-3-acetic acid inducible 29	sp|Q9C5W9|ARFR_ARATH Auxin response factor 18 OS=Arabidopsis thaliana OX=3702 GN=ARF18 PE=1 SV=1	AUX-IAA
Potra2n7c15847	-1.53649	Downregulated	5	0.097	0.198	0.00984885	AT1G72210	basic helix-loop-helix (bHLH) DNA-binding superfamily protein	sp|Q336P5|MYC2_ORYSJ Transcription factor MYC2 OS=Oryza sativa subsp. japonica OX=39947 GN=MYC2 PE=1 SV=1	bHLH
Potra2n1c2330	1.08181	Upregulated	5	0.148	0.062	0.00187226	AT2G42280	basic helix-loop-helix (bHLH) DNA-binding superfamily protein	sp|Q9C8P8|BH080_ARATH Transcription factor bHLH80 OS=Arabidopsis thaliana OX=3702 GN=BHLH80 PE=2 SV=1	bHLH
Potra2n5c10860	1.10807	Upregulated	5	0.254	0.127	8.76012e-06	AT2G31280	transcription factor bHLH155-like protein|CPUORF7	sp|Q9ZPY8|AIB_ARATH Transcription factor ABA-INDUCIBLE bHLH-TYPE OS=Arabidopsis thaliana OX=3702 GN=AIB PE=2 SV=2	bHLH
Potra2n4c8651	1.18398	Upregulated	5	0.286	0.123	4.813e-11	AT1G61660	basic helix-loop-helix (bHLH) DNA-binding superfamily protein	sp|Q2QQ32|BH133_ORYSJ Transcription factor BHLH133 OS=Oryza sativa subsp. japonica OX=39947 GN=BHLH133 PE=2 SV=1	bHLH
Potra2n18c32296	1.2101	Upregulated	5	0.263	0.139	2.82813e-05	AT2G24260	LJRHL1-like 1|LRL1	sp|Q9S7Y1|BH030_ARATH Transcription factor bHLH30 OS=Arabidopsis thaliana OX=3702 GN=BHLH30 PE=1 SV=1	bHLH
Potra2n6c14701	1.31618	Upregulated	5	0.919	0.604	1.01164e-62	AT5G57150	basic helix-loop-helix (bHLH) DNA-binding superfamily protein	sp|Q8S3F1|BH020_ARATH Transcription factor NAI1 OS=Arabidopsis thaliana OX=3702 GN=NAI1 PE=2 SV=1	bHLH
Potra2n6c13712	1.34021	Upregulated	5	0.358	0.148	7.98592e-17	AT2G24260	LJRHL1-like 1|LRL1	sp|Q9FE22|HFR1_ARATH Transcription factor HFR1 OS=Arabidopsis thaliana OX=3702 GN=HFR1 PE=1 SV=1	bHLH
Potra2n18c32068	1.45523	Upregulated	5	0.349	0.132	3.55925e-18	AT5G57150	basic helix-loop-helix (bHLH) DNA-binding superfamily protein	sp|A0A3Q7HES4|MTB2_SOLLC Transcription factor MTB2 OS=Solanum lycopersicum OX=4081 GN=MTB2 PE=2 SV=1	bHLH
Potra2n9c19481	2.70963	Upregulated	5	0.289	0.045	4.64267e-40	AT2G42280	basic helix-loop-helix (bHLH) DNA-binding superfamily protein	sp|Q84WK0|BH085_ARATH Transcription factor bHLH85 OS=Arabidopsis thaliana OX=3702 GN=BHLH85 PE=2 SV=1	bHLH
Potra2n234s35052	1.18019	Upregulated	5	0.473	0.234	1.89162e-16	AT5G63320	nuclear protein X1|NPX1	sp|O15016|TRI66_HUMAN Tripartite motif-containing protein 66 OS=Homo sapiens OX=9606 GN=TRIM66 PE=1 SV=4	Bromodomain
Potra2n14c27078	1.36914	Upregulated	5	0.379	0.15	1.62498e-19	AT3G61600	POZ/BTB containin G-protein 1|ATPOB1,POB1	sp|Q80TF4|KLH13_MOUSE Kelch-like protein 13 OS=Mus musculus OX=10090 GN=Klhl13 PE=2 SV=3	BTB-POZ
Potra2n8c17149	1.53858	Upregulated	5	0.208	0.076	9.03328e-10	AT2G39760	BTB/POZ/MATH-domains containing protein	sp|Q9W2S3|BTBD9_DROME BTB/POZ domain-containing protein 9 OS=Drosophila melanogaster OX=7227 GN=BTBD9 PE=1 SV=1	BTB-POZ-MATH
Potra2n2c5816	1.14378	Upregulated	5	0.187	0.076	4.10486e-06	AT5G44080	Basic-leucine zipper (bZIP) transcription factor family protein	sp|P42777|GBF4_ARATH G-box-binding factor 4 OS=Arabidopsis thaliana OX=3702 GN=GBF4 PE=1 SV=1	bZIP
Potra2n5c12058	1.31188	Upregulated	5	0.328	0.123	1.18208e-16	AT4G39350	cellulose synthase(cesa) A2|ATCESA2,ATH-A,CESA2	sp|P58931|BCSA_PSEFS Cellulose synthase catalytic subunit [UDP-forming] OS=Pseudomonas fluorescens (strain SBW25) OX=216595 GN=bcsA PE=3 SV=2	bZIP
Potra2n3c7255	1.72925	Upregulated	5	0.127	0.035	8.00966e-08	AT5G41790	COP1-interactive protein 1	sp|F4JZY1|CIP1_ARATH COP1-interactive protein 1 OS=Arabidopsis thaliana OX=3702 GN=CIP1 PE=1 SV=1	bZIP
Potra2n18c33136	-1.22978	Downregulated	5	0.268	0.456	2.08569e-10	AT5G24930	zinc finger CONSTANS-like protein|ATCOL4,COL4	sp|Q8RWD0|COL16_ARATH Zinc finger protein CONSTANS-LIKE 16 OS=Arabidopsis thaliana OX=3702 GN=COL16 PE=1 SV=2	C2C2-CO-like
Potra2n18c32310	1.03271	Upregulated	5	0.252	0.113	1.12782e-07	AT5G57990	ubiquitin-specific protease 23|UBP23	sp|Q9W462|UBP30_DROME Ubiquitin carboxyl-terminal hydrolase 30 homolog OS=Drosophila melanogaster OX=7227 GN=Usp30 PE=2 SV=1	C2H2
Potra2n10c21812	1.05834	Upregulated	5	0.166	0.075	0.00169876	AT5G43420	RING/U-box superfamily protein	sp|Q9U2B7|PLR1_CAEEL Probable E3 ubiquitin-protein ligase plr-1 OS=Caenorhabditis elegans OX=6239 GN=plr-1 PE=1 SV=2	C2H2
Potra2n14c27657	1.11327	Upregulated	5	0.619	0.331	2.13102e-24	AT4G15420	Ubiquitin fusion degradation UFD1 family protein	sp|Q5NBU8|XAF1_MOUSE XIAP-associated factor 1 OS=Mus musculus OX=10090 GN=Xaf1 PE=1 SV=3	C2H2
Potra2n18c32390	1.11343	Upregulated	5	0.238	0.095	5.82453e-09	AT2G18670	RING/U-box superfamily protein	sp|Q9LW77|HRD1A_ARATH ERAD-associated E3 ubiquitin-protein ligase HRD1A OS=Arabidopsis thaliana OX=3702 GN=HRD1A PE=2 SV=1	C2H2
Potra2n1c2109	1.17641	Upregulated	5	0.196	0.081	2.33272e-06	AT3G46620	zinc finger (C3HC4-type RING finger) family protein	sp|Q9Y225|RNF24_HUMAN RING finger protein 24 OS=Homo sapiens OX=9606 GN=RNF24 PE=1 SV=1	C2H2
Potra2n9c19249	1.17853	Upregulated	5	0.115	0.044	0.00620818	AT4G34100	RING/U-box superfamily protein	sp|Q9P2E8|MARH4_HUMAN E3 ubiquitin-protein ligase MARCHF4 OS=Homo sapiens OX=9606 GN=MARCHF4 PE=2 SV=2	C2H2
Potra2n14c26445	1.20851	Upregulated	5	0.67	0.355	3.25645e-30	AT1G27730	salt tolerance zinc finger|STZ,ZAT10	sp|Q42410|ZAT12_ARATH Zinc finger protein ZAT12 OS=Arabidopsis thaliana OX=3702 GN=ZAT12 PE=2 SV=1	C2H2
Potra2n5c12524	1.21479	Upregulated	5	0.192	0.064	1.9595e-09	AT3G05200	RING/U-box superfamily protein|ATL6	sp|Q9Y6U7|RN215_HUMAN RING finger protein 215 OS=Homo sapiens OX=9606 GN=RNF215 PE=4 SV=2	C2H2
Potra2n9c19823	1.30242	Upregulated	5	0.718	0.38	4.53008e-39	AT3G46620	zinc finger (C3HC4-type RING finger) family protein	sp|O64762|ATL38_ARATH RING-H2 finger protein ATL38 OS=Arabidopsis thaliana OX=3702 GN=ATL38 PE=2 SV=1	C2H2
Potra2n8c18601	1.3755	Upregulated	5	0.157	0.054	6.35716e-07	AT3G16720	TOXICOS EN LEVADURA 2|ATL2,TL2	sp|Q66J97|R111C_XENLA E3 ubiquitin-protein ligase arkadia-C OS=Xenopus laevis OX=8355 GN=rnf111-c PE=2 SV=1	C2H2
Potra2n5c12101	1.42361	Upregulated	5	0.118	0.04	0.000241056	AT2G22010	related to KPC1|RKP	sp|Q00839|HNRPU_HUMAN Heterogeneous nuclear ribonucleoprotein U OS=Homo sapiens OX=9606 GN=HNRNPU PE=1 SV=6	C2H2
Potra2n13c26069	1.43862	Upregulated	5	0.249	0.091	2.86066e-12	AT3G05200	RING/U-box superfamily protein|ATL6	sp|P38239|YBR2_YEAST Uncharacterized RING finger protein YBR062C OS=Saccharomyces cerevisiae (strain ATCC 204508 / S288c) OX=559292 GN=YBR062C PE=1 SV=2	C2H2
Potra2n1c2646	1.51444	Upregulated	5	0.208	0.066	2.73946e-12	AT4G34100	RING/U-box superfamily protein	sp|Q5XIE5|MARH3_RAT E3 ubiquitin-protein ligase MARCHF3 OS=Rattus norvegicus OX=10116 GN=Marchf3 PE=1 SV=1	C2H2
Potra2n11c23381	1.667	Upregulated	5	0.328	0.104	5.8886e-23	AT1G61140	SNF2 domain-containing protein / helicase domain-containing protein / zinc finger protein-like protein|EDA16	sp|A4PBL4|RAD54_ORYSJ DNA repair and recombination protein RAD54 OS=Oryza sativa subsp. japonica OX=39947 GN=RAD54 PE=1 SV=1	C2H2
Potra2n8c17134	1.73151	Upregulated	5	0.229	0.061	1.22548e-17	AT5G59550	zinc finger (C3HC4-type RING finger) family protein	sp|P0DPR2|RNF43_XENTR E3 ubiquitin-protein ligase RNF43 OS=Xenopus tropicalis OX=8364 GN=rnf43 PE=2 SV=1	C2H2
Potra2n16c29776	1.85602	Upregulated	5	0.229	0.065	5.9811e-17	AT3G58040	seven in absentia of Arabidopsis 2|SINAT2	sp|Q2TAD9|CYR1B_XENLA Cysteine and histidine-rich protein 1-B OS=Xenopus laevis OX=8355 GN=cyhr1-b PE=2 SV=2	C2H2
Potra2n5c11780	1.8067	Upregulated	5	0.141	0.036	7.23199e-10	AT5G66270	Zinc finger C-x8-C-x5-C-x3-H type family protein	sp|Q56XU4|C3H6_ARATH Zinc finger CCCH domain-containing protein 6 OS=Arabidopsis thaliana OX=3702 GN=At1g19860 PE=1 SV=1	C3H
Potra2n9c18966	1.09371	Upregulated	5	0.379	0.168	1.97396e-14	AT4G38680	glycine rich protein 2|ATCSP2,CSDP2,CSP2,GRP2	sp|Q51929|CSPA_PHOLD Major cold shock protein (Fragment) OS=Photobacterium leiognathi subsp. mandapamensis OX=48408 GN=cspA PE=3 SV=1	CCHC(Zn)
Potra2n8c17598	1.04753	Upregulated	5	0.236	0.117	5.47103e-05	AT3G16940	calmodulin-binding transcription activator	sp|Q80Y50|CMTA2_MOUSE Calmodulin-binding transcription activator 2 OS=Mus musculus OX=10090 GN=Camta2 PE=2 SV=1	CG1-CAMTA
Potra2n2c5700	1.08027	Upregulated	5	0.141	0.058	0.00267718	AT1G77300	histone-lysine N-methyltransferase|ASHH2,CCR1,EFS,SDG8	sp|Q9FNC7|SUVR2_ARATH Probable inactive histone-lysine N-methyltransferase SUVR2 OS=Arabidopsis thaliana OX=3702 GN=SUVR2 PE=1 SV=2	CW-Zn
Potra2n548s35915	1.24245	Upregulated	5	0.885	0.542	2.72835e-49	AT5G48150	GRAS family transcription factor	sp|Q2V2T9|SCL16_ARATH Putative scarecrow-like protein 16 OS=Arabidopsis thaliana OX=3702 GN=SCL16 PE=5 SV=1	GRAS
Potra2n8c17839	1.3312	Upregulated	5	0.155	0.058	1.70286e-05	AT1G14920	GRAS family transcription factor family protein|GAI,RGA2	sp|Q9LRW3|SCL29_ARATH Scarecrow-like protein 29 OS=Arabidopsis thaliana OX=3702 GN=SCL29 PE=2 SV=1	GRAS
Potra2n1c2095	1.40359	Upregulated	5	0.166	0.057	1.31746e-07	AT1G07530	SCARECROW-like 14|ATGRAS2,GRAS2,SCL14	sp|Q7XJM8|SCL27_ARATH Scarecrow-like protein 27 OS=Arabidopsis thaliana OX=3702 GN=SCL27 PE=2 SV=1	GRAS
Potra2n17c30701	1.79467	Upregulated	5	0.173	0.053	1.85882e-10	AT5G52510	SCARECROW-like 8|SCL8	sp|Q2V2T9|SCL16_ARATH Putative scarecrow-like protein 16 OS=Arabidopsis thaliana OX=3702 GN=SCL16 PE=5 SV=1	GRAS
Potra2n5c11185	1.79641	Upregulated	5	0.266	0.085	1.11284e-17	AT1G21450	SCARECROW-like 1|SCL1	sp|O23210|SCL15_ARATH Scarecrow-like protein 15 OS=Arabidopsis thaliana OX=3702 GN=SCL15 PE=1 SV=3	GRAS
Potra2n17c30845	-1.41556	Downregulated	5	0.134	0.246	0.00413346	AT2G28720	Histone superfamily protein	sp|Q54BC2|H2BV1_DICDI Histone H2B.v1 OS=Dictyostelium discoideum OX=44689 GN=H2Bv1 PE=3 SV=1	Hap3/NF-YB
Potra2n18c32457	-1.39251	Downregulated	5	0.134	0.246	0.00359355	AT1G07660	Histone superfamily protein	sp|P80738|H4Y_BLEJA Histone H4 (Fragment) OS=Blepharisma japonicum OX=5961 PE=1 SV=2	Hap3/NF-YB
Potra2n18c32460	-1.37013	Downregulated	5	0.145	0.256	0.00586259	AT1G07660	Histone superfamily protein	sp|P80738|H4Y_BLEJA Histone H4 (Fragment) OS=Blepharisma japonicum OX=5961 PE=1 SV=2	Hap3/NF-YB
Potra2n6c14627	-1.2067	Downregulated	5	0.46	0.671	5.55336e-21	AT5G02560	histone H2A 12|HTA12	sp|Q54HV9|H2AV2_DICDI Histone H2A.v2 OS=Dictyostelium discoideum OX=44689 GN=H2Av2 PE=3 SV=1	Hap3/NF-YB
Potra2n7c15856	-1.17854	Downregulated	5	0.801	0.91	2.33294e-59	AT4G40030	Histone superfamily protein	sp|Q9V6Q2|CID_DROME Histone H3-like centromeric protein cid OS=Drosophila melanogaster OX=7227 GN=cid PE=1 SV=2	Hap3/NF-YB
Potra2n9c19886	-1.04291	Downregulated	5	0.335	0.482	6.2903e-07	AT2G28720	Histone superfamily protein	sp|Q54BC2|H2BV1_DICDI Histone H2B.v1 OS=Dictyostelium discoideum OX=44689 GN=H2Bv1 PE=3 SV=1	Hap3/NF-YB
Potra2n2c5385	-1.49254	Downregulated	5	0.092	0.197	0.00701102	AT4G37790	Homeobox-leucine zipper protein family|HAT22	sp|Q9M276|ATB12_ARATH Homeobox-leucine zipper protein ATHB-12 OS=Arabidopsis thaliana OX=3702 GN=ATHB-12 PE=1 SV=1	Homobox-WOX
Potra2n7c16575	1.17539	Upregulated	5	0.446	0.204	3.33171e-18	AT4G37790	Homeobox-leucine zipper protein family|HAT22	sp|Q6H6S3|HOX24_ORYSJ Homeobox-leucine zipper protein HOX24 OS=Oryza sativa subsp. japonica OX=39947 GN=HOX24 PE=2 SV=1	Homobox-WOX
Potra2n6c14302	1.08504	Upregulated	5	0.289	0.137	6.02778e-08	AT5G03720	heat shock transcription factor A3|AT-HSFA3,HSFA3	sp|P20134|SFL1_YEAST Flocculation suppression protein OS=Saccharomyces cerevisiae (strain ATCC 204508 / S288c) OX=559292 GN=SFL1 PE=1 SV=3	HSF-type-DNA-bin
Potra2n1c908	1.17662	Upregulated	5	0.159	0.058	4.7209e-06	AT5G62020	heat shock transcription factor B2A|AT-HSFB2A,HSFB2A	sp|A0A1B0GWH4|HSFX3_HUMAN Heat shock transcription factor, X-linked member 3 OS=Homo sapiens OX=9606 GN=HSFX3 PE=3 SV=1	HSF-type-DNA-bin
Potra2n7c16268	1.50314	Upregulated	5	0.467	0.176	4.68515e-29	AT4G36990	heat shock factor 4|AT-HSFB1,ATHSF4,HSF4,HSFB1	sp|Q5AK51|SFL2_CANAL Transcription factor SFL2 OS=Candida albicans (strain SC5314 / ATCC MYA-2876) OX=237561 GN=SFL2 PE=1 SV=2	HSF-type-DNA-bin
Potra2n2c5513	1.04142	Upregulated	5	0.589	0.302	9.28285e-22	AT1G78280	transferases, transferring glycosyl groups	sp|Q6ZMT4|KDM7A_HUMAN Lysine-specific demethylase 7A OS=Homo sapiens OX=9606 GN=KDM7A PE=1 SV=2	JmjC
Potra2n3c7648	1.54187	Upregulated	5	0.46	0.156	5.2483e-32	AT5G46910	Transcription factor jumonji (jmj) family protein / zinc finger (C5HC2 type) family protein	sp|Q03214|ECM5_YEAST Protein ECM5 OS=Saccharomyces cerevisiae (strain ATCC 204508 / S288c) OX=559292 GN=ECM5 PE=1 SV=1	JmjC
Potra2n1c2551	-1.17428	Downregulated	5	0.358	0.543	2.588e-10	AT1G10200	GATA type zinc finger transcription factor family protein	sp|D3ZQL6|MILK1_RAT MICAL-like protein 1 OS=Rattus norvegicus OX=10116 GN=Micall1 PE=1 SV=1	LIM
Potra2n9c19208	1.32146	Upregulated	5	0.764	0.4	6.74385e-41	AT3G48690	alpha/beta-Hydrolases superfamily protein|ATCXE12,CXE12	sp|P37967|PNBA_BACSU Para-nitrobenzyl esterase OS=Bacillus subtilis (strain 168) OX=224308 GN=pnbA PE=1 SV=2	LIM
Potra2n3c6873	1.34969	Upregulated	5	0.125	0.048	0.00133489	AT3G24800	proteolysis 1|PRT1	sp|Q8LBL5|PRT1_ARATH E3 ubiquitin-protein ligase PRT1 OS=Arabidopsis thaliana OX=3702 GN=PRT1 PE=2 SV=2	LIM
Potra2n6c14782	1.15461	Upregulated	5	0.263	0.108	3.27554e-10	AT3G15880	WUS-interacting protein 2	sp|Q84JM4|TPR3_ARATH Topless-related protein 3 OS=Arabidopsis thaliana OX=3702 GN=TPR3 PE=1 SV=1	LisH
Potra2n15c28298	-1.14766	Downregulated	5	0.425	0.631	6.70127e-19	AT2G45660	AGAMOUS-like 20	sp|Q9FJK3|AGL80_ARATH Agamous-like MADS-box protein AGL80 OS=Arabidopsis thaliana OX=3702 GN=AGL80 PE=1 SV=1	MADS-MIKC
Potra2n6c14448	1.6057	Upregulated	5	0.436	0.153	4.69353e-29	AT2G38250	Homeodomain-like superfamily protein	sp|P17040|ZSC20_HUMAN Zinc finger and SCAN domain-containing protein 20 OS=Homo sapiens OX=9606 GN=ZSCAN20 PE=1 SV=3	MYB
Potra2n16c30327	1.64359	Upregulated	5	0.587	0.213	9.96905e-45	AT2G38250	Homeodomain-like superfamily protein	sp|Q9LZS0|PTL_ARATH Trihelix transcription factor PTL OS=Arabidopsis thaliana OX=3702 GN=PTL PE=1 SV=1	MYB
Potra2n4c9980	-1.46504	Downregulated	5	0.196	0.383	7.22592e-10	AT4G38620	myb domain protein 4|ATMYB4,MYB4	sp|Q9LNI5|ETC1_ARATH MYB-like transcription factor ETC1 OS=Arabidopsis thaliana OX=3702 GN=ETC1 PE=2 SV=1	MYB-HB-like
Potra2n14c27283	1.03954	Upregulated	5	0.33	0.161	2.72034e-09	AT3G06490	myb domain protein 108|AtMYB108,BOS1,MYB108	sp|Q54CT1|MYBN_DICDI Myb-like protein N OS=Dictyostelium discoideum OX=44689 GN=mybN PE=3 SV=1	MYB-HB-like
Potra2n1c1901	1.05609	Upregulated	5	0.432	0.211	4.44802e-14	AT5G04760	Duplicated homeodomain-like superfamily protein	sp|Q6P2Y3|DNJC2_XENTR DnaJ homolog subfamily C member 2 OS=Xenopus tropicalis OX=8364 GN=dnajc2 PE=2 SV=2	MYB-HB-like
Potra2n203s34956	1.60247	Upregulated	5	0.63	0.274	8.28358e-42	AT4G37180	Homeodomain-like superfamily protein	sp|Q9FJV5|KAN4_ARATH Probable transcription factor KAN4 OS=Arabidopsis thaliana OX=3702 GN=KAN4 PE=1 SV=1	MYB-HB-like
Potra2n5c11718	3.07052	Upregulated	5	0.122	0.015	7.64462e-17	AT1G19510	RAD-like 5|ATRL5,RL5,RSM4	sp|Q9FNN6|SRM1_ARATH Transcription factor SRM1 OS=Arabidopsis thaliana OX=3702 GN=SRM1 PE=1 SV=1	MYB-HB-like
Potra2n1c3797	-1.02468	Downregulated	5	0.245	0.405	5.70389e-06	AT2G46770	NAC (No Apical Meristem) domain transcriptional regulator superfamily protein|ANAC043,EMB2301,NST1	sp|Q5PP28|NAC3_ARATH NAC domain-containing protein 3 OS=Arabidopsis thaliana OX=3702 GN=NAC003 PE=2 SV=1	NAM
Potra2n3c6990	1.02792	Upregulated	5	0.351	0.17	3.82809e-10	AT5G13180	NAC domain containing protein 83|ANAC083,NAC083,VNI2	sp|O49459|NAC73_ARATH NAC domain-containing protein 73 OS=Arabidopsis thaliana OX=3702 GN=NAC073 PE=2 SV=1	NAM
Potra2n6c13489	1.06316	Upregulated	5	0.206	0.088	4.06903e-06	AT5G22380	NAC domain containing protein 90|anac090,NAC090	sp|Q5PP28|NAC3_ARATH NAC domain-containing protein 3 OS=Arabidopsis thaliana OX=3702 GN=NAC003 PE=2 SV=1	NAM
Potra2n5c12247	1.06645	Upregulated	5	0.991	0.913	2.32448e-80	AT1G01720	NAC (No Apical Meristem) domain transcriptional regulator superfamily protein|ANAC002,ATAF1	sp|Q9M0F8|NAC75_ARATH NAC domain-containing protein 75 OS=Arabidopsis thaliana OX=3702 GN=NAC075 PE=2 SV=1	NAM
Potra2n12c24701	2.28605	Upregulated	5	0.111	0.018	8.21564e-12	AT1G31280	Argonaute family protein|AGO2	sp|Q852N2|AGO13_ORYSJ Protein argonaute 13 OS=Oryza sativa subsp. japonica OX=39947 GN=AGO13 PE=2 SV=1	PAZ-Argonaute
Potra2n8c17898	1.00802	Upregulated	5	0.162	0.074	0.00515213	AT1G14740	class I heat shock protein, putative (DUF1423)	sp|Q9S736|OBE1_ARATH Protein OBERON 1 OS=Arabidopsis thaliana OX=3702 GN=OBE1 PE=1 SV=1	PHD
Potra2n4c10257	1.14642	Upregulated	5	0.155	0.062	0.000219464	AT5G60410	DNA-binding protein with MIZ/SP-RING zinc finger, PHD-finger and SAP domain-containing protein|ATSIZ1,SIZ1	sp|Q6ASW7|SIZ2_ORYSJ E3 SUMO-protein ligase SIZ2 OS=Oryza sativa subsp. japonica OX=39947 GN=SIZ2 PE=2 SV=1	PHD
Potra2n16c30154	1.28087	Upregulated	5	0.134	0.042	2.11807e-06	AT2G36720	Acyl-CoA N-acyltransferase with RING/FYVE/PHD-type zinc finger domain-containing protein	sp|Q6ZPK0|PF21A_MOUSE PHD finger protein 21A OS=Mus musculus OX=10090 GN=Phf21a PE=1 SV=3	PHD
Potra2n1c2289	1.33473	Upregulated	5	0.129	0.046	0.000126684	AT3G63500	fibronectin type III domain protein (DUF1423)	sp|Q9S736|OBE1_ARATH Protein OBERON 1 OS=Arabidopsis thaliana OX=3702 GN=OBE1 PE=1 SV=1	PHD
Potra2n4c9878	1.21199	Upregulated	5	0.152	0.067	0.00159295	AT2G16485	GW repeat- and PHD finger-containing protein NERD	sp|Q5RAD5|RTF1_PONAB RNA polymerase-associated protein RTF1 homolog (Fragment) OS=Pongo abelii OX=9601 GN=RTF1 PE=2 SV=2	SWIB-Plus-3
Potra2n7c16499	1.23725	Upregulated	5	0.192	0.073	1.77458e-07	AT3G51120	zinc finger CCCH domain-containing protein 44	sp|Q6P2L6|NSD3_MOUSE Histone-lysine N-methyltransferase NSD3 OS=Mus musculus OX=10090 GN=Nsd3 PE=1 SV=2	SWIB-Plus-3
Potra2n5c10924	1.10216	Upregulated	5	0.245	0.109	2.10176e-07	AT1G03060	BEACH-DOMAIN HOMOLOG A1	sp|A8X8C6|TG125_CAEBR WD repeat-containing protein tag-125 OS=Caenorhabditis briggsae OX=6238 GN=tag-125 PE=4 SV=1	WD40-like
Potra2n6c13102	1.1042	Upregulated	5	0.182	0.076	3.29818e-05	AT3G15980	Coatomer, beta' subunit	sp|Q54W52|WDR12_DICDI Ribosome biogenesis protein WDR12 homolog OS=Dictyostelium discoideum OX=44689 GN=wdr12 PE=2 SV=1	WD40-like
Potra2n18c33127	1.26591	Upregulated	5	0.143	0.059	0.00100438	AT5G27640	translation initiation factor 3B1	sp|Q9BY44|EIF2A_HUMAN Eukaryotic translation initiation factor 2A OS=Homo sapiens OX=9606 GN=EIF2A PE=1 SV=3	WD40-like
Potra2n10c21118	1.0365	Upregulated	5	0.388	0.192	6.2047e-12	AT5G49520	WRKY DNA-binding protein 48|ATWRKY48,WRKY48	sp|K4BIZ9|WRK70_SOLLC WRKY DNA-binding transcription factor 70 OS=Solanum lycopersicum OX=4081 GN=WRKY70 PE=2 SV=1	WRKY
Potra2n6c12972	1.10409	Upregulated	5	0.282	0.125	2.72419e-09	AT1G80840	WRKY DNA-binding protein 40|ATWRKY40,WRKY40	sp|Q8GWF1|WRK38_ARATH Probable WRKY transcription factor 38 OS=Arabidopsis thaliana OX=3702 GN=WRKY38 PE=1 SV=1	WRKY
Potra2n13c25005	1.18876	Upregulated	5	0.679	0.383	1.70657e-27	AT2G38470	WRKY DNA-binding protein 33|ATWRKY33,WRKY33	sp|Q9M8M6|WRK66_ARATH Probable WRKY transcription factor 66 OS=Arabidopsis thaliana OX=3702 GN=WRKY66 PE=2 SV=1	WRKY
Potra2n2c4882	1.19143	Upregulated	5	0.247	0.101	1.42785e-09	AT4G11070	WRKY family transcription factor|AtWRKY41,WRKY41	sp|Q6IEK5|WRK76_ORYSI WRKY transcription factor WRKY76 OS=Oryza sativa subsp. indica OX=39946 GN=WRKY76 PE=2 SV=1	WRKY
Potra2n1c366	1.20893	Upregulated	5	0.656	0.324	3.55045e-31	AT1G80840	WRKY DNA-binding protein 40|ATWRKY40,WRKY40	sp|Q93WV7|WRK67_ARATH Probable WRKY transcription factor 67 OS=Arabidopsis thaliana OX=3702 GN=WRKY67 PE=2 SV=1	WRKY
Potra2n6c14723	1.2227	Upregulated	5	0.778	0.461	1.33703e-36	AT4G31550	WRKY DNA-binding protein 11|ATWRKY11,WRKY11	sp|Q93WV7|WRK67_ARATH Probable WRKY transcription factor 67 OS=Arabidopsis thaliana OX=3702 GN=WRKY67 PE=2 SV=1	WRKY
Potra2n8c17556	1.49556	Upregulated	5	0.365	0.135	1.22214e-20	AT5G49520	WRKY DNA-binding protein 48|ATWRKY48,WRKY48	sp|K4BIZ9|WRK70_SOLLC WRKY DNA-binding transcription factor 70 OS=Solanum lycopersicum OX=4081 GN=WRKY70 PE=2 SV=1	WRKY
Potra2n1c1208	1.00154	Upregulated	5	0.543	0.292	1.18629e-16	AT4G17900	PLATZ transcription factor family protein		Znf-B
Potra2n5c10502	2.88977	Upregulated	5	0.152	0.018	5.35973e-22	AT1G21000	PLATZ transcription factor family protein		Znf-B
Potra2n14c26735	1.14458	Upregulated	5	0.397	0.188	8.87579e-14	AT1G02170	metacaspase 1|AMC1,ATMC1,ATMCPB1,LOL3,MCP1B	sp|Q9SA41|MCA8_ARATH Metacaspase-8 OS=Arabidopsis thaliana OX=3702 GN=AMC8 PE=1 SV=1	Znf-LSD
Potra2n10c21889	1.12754	Upregulated	5	0.298	0.128	5.16764e-11	AT4G13510	ammonium transporter 1;1|AMT1;1,ATAMT1,ATAMT1;1	sp|Q69D47|RHBG_ORYLA Ammonium transporter Rh type B OS=Oryzias latipes OX=8090 GN=rhbg PE=2 SV=1
Potra2n6c14433	2.10102	Upregulated	5	0.679	0.201	2.65842e-73	AT2G38290	ammonium transporter 2|AMT2,AMT2;1,ATAMT2	sp|Q19KH7|RHCG_GASAC Ammonium transporter Rh type C OS=Gasterosteus aculeatus OX=69293 GN=rhcg PE=2 SV=1
Potra2n18c32565	1.48083	Upregulated	5	0.49	0.186	4.08501e-31	AT5G19550	aspartate aminotransferase 2|AAT2,ASP2	sp|Q7TSV6|AATC2_MOUSE Putative aspartate aminotransferase, cytoplasmic 2 OS=Mus musculus OX=10090 GN=Got1l1 PE=2 SV=1
Potra2n12c24793	2.42361	Upregulated	5	0.118	0.018	1.94444e-13	AT4G21120	amino acid transporter 1	sp|Q46065|AROP_CORGL Aromatic amino acid transport protein AroP OS=Corynebacterium glutamicum (strain ATCC 13032 / DSM 20300 / JCM 1318 / LMG 3730 / NCIMB 10025) OX=196627 GN=aroP PE=3 SV=1
Potra2n12c23912	2.99407	Upregulated	5	0.171	0.021	3.52609e-25	AT5G53460	NADH-dependent glutamate synthase 1|GLT1	sp|Q58931|TRXB_METJA Putative thioredoxin reductase OS=Methanocaldococcus jannaschii (strain ATCC 43067 / DSM 2661 / JAL-1 / JCM 10045 / NBRC 100440) OX=243232 GN=MJ1536 PE=3 SV=1
Potra2n1c2934	1.80186	Upregulated	5	0.252	0.067	2.29566e-20	AT5G40780	lysine histidine transporter 1|LHT1	sp|Q9SVG0|AVT3C_ARATH Amino acid transporter AVT3C OS=Arabidopsis thaliana OX=3702 GN=AVT3C PE=1 SV=1
Potra2n4c9696	7.21997	Upregulated	5	0.529	0.007	1.41785e-150	AT2G15620	nitrite reductase 1|ATHNIR,NIR,NIR1	sp|P21637|COBG_SINSX Precorrin-3B synthase OS=Sinorhizobium sp. OX=42445 GN=cobG PE=3 SV=2
Potra2n15c28440	4.84903	Upregulated	5	0.226	0.012	2.31243e-48	AT5G50200	nitrate transmembrane transporter|ATNRT3.1,NRT3.1,WR3	sp|Q7XK12|NAR22_ORYSJ Probable high-affinity nitrate transporter-activating protein 2.2 OS=Oryza sativa subsp. japonica OX=39947 GN=NAR2.2 PE=2 SV=1
Potra2n1c2237	1.68903	Upregulated	5	0.169	0.05	4.38506e-10	AT5G04590	sulfite reductase|SIR	sp|P38500|NIR_BETPN Ferredoxin--nitrite reductase, chloroplastic OS=Betula pendula OX=3505 GN=NIR1 PE=2 SV=1
Potra2n12c24072	-2.39548	Downregulated	5	0.058	0.22	6.8831e-10	AT3G17790	purple acid phosphatase 17|ATACP5,ATPAP17,PAP17	sp|O97860|PPA5_RABIT Tartrate-resistant acid phosphatase type 5 OS=Oryctolagus cuniculus OX=9986 GN=ACP5 PE=2 SV=1
Potra2n18c33016	-2.30224	Downregulated	5	0.06	0.209	1.10097e-08	AT1G30380	photosystem I subunit K|PSAK	sp|P14627|PSAK_SPIOL Photosystem I reaction center subunit psaK, chloroplastic (Fragment) OS=Spinacia oleracea OX=3562 GN=PSAK PE=1 SV=2
Potra2n8c18502	-2.20355	Downregulated	5	0.406	0.74	5.24637e-54	AT5G19140	aluminum induced protein with YGL and LRDR motifs|AILP1,ATAILP1	sp|Q54MB4|ASNS_DICDI Probable asparagine synthetase [glutamine-hydrolyzing] OS=Dictyostelium discoideum OX=44689 GN=asns PE=1 SV=1
Potra2n3c6926	-2.20243	Downregulated	5	0.436	0.775	3.65645e-63	AT1G67360	Rubber elongation factor protein (REF)	sp|P15252|REF_HEVBR Rubber elongation factor protein OS=Hevea brasiliensis OX=3981 PE=1 SV=2
Potra2n5c10695	-2.19551	Downregulated	5	0.085	0.223	9.29127e-07	AT2G34430	light-harvesting chlorophyll-protein complex II subunit B1|LHB1B1,LHCB1.4	sp|Q93WD2|CB29_CHLRE Chlorophyll a-b binding protein CP29 OS=Chlamydomonas reinhardtii OX=3055 GN=Lhcb4 PE=1 SV=3
Potra2n5c11311	-2.08518	Downregulated	5	0.044	0.139	0.00182592	AT1G77720	putative protein kinase 1|PPK1	sp|Q54XY6|Y0019_DICDI Probable serine/threonine-protein kinase DDB_G0278521 OS=Dictyostelium discoideum OX=44689 GN=DDB_G0278521 PE=3 SV=1
Potra2n16c30308	-1.87991	Downregulated	5	0.173	0.384	1.71213e-14	AT5G01530	light harvesting complex photosystem II|LHCB4.1	sp|P0DO18|LHR32_CHLRE Light-harvesting complex stress-related protein 3.2, chloroplastic OS=Chlamydomonas reinhardtii OX=3055 GN=LHCSR3.2 PE=1 SV=1
Potra2n7c16513	-1.87257	Downregulated	5	0.351	0.637	9.08749e-28	AT2G18050	histone H1-3|HIS1-3	sp|Q08864|H11_VOLCA Histone H1-I OS=Volvox carteri OX=3067 GN=H1-I PE=2 SV=3
Potra2n10c21146	-1.7427	Downregulated	5	0.192	0.424	1.62951e-16	AT1G05760	Mannose-binding lectin superfamily protein|RTM1	sp|F4HQX1|JAL3_ARATH Jacalin-related lectin 3 OS=Arabidopsis thaliana OX=3702 GN=JAL3 PE=2 SV=1
Potra2n7c15922	-1.6701	Downregulated	5	0.328	0.599	5.06931e-27	AT1G78020	senescence-associated family protein, putative (DUF581)	sp|Q9FH22|FLZ15_ARATH FCS-Like Zinc finger 15 OS=Arabidopsis thaliana OX=3702 GN=FLZ15 PE=1 SV=1
Potra2n12c24671	-1.65665	Downregulated	5	0.062	0.158	0.00862003	AT5G61670	orange protein	sp|Q8VYD8|ORLIK_ARATH Protein ORANGE-LIKE, chloroplastic OS=Arabidopsis thaliana OX=3702 GN=ORLIKE PE=1 SV=1
Potra2n8c17288	-1.64253	Downregulated	5	0.293	0.558	1.06105e-23	AT4G14270	polyadenylate-binding protein interacting protein	sp|Q39096|ERD15_ARATH Protein EARLY RESPONSIVE TO DEHYDRATION 15 OS=Arabidopsis thaliana OX=3702 GN=ERD15 PE=1 SV=1
Potra2n1c2826	-1.61298	Downregulated	5	0.314	0.597	1.17643e-25	AT3G02040	senescence-related gene 3|SRG3	sp|Q21407|GPCP1_CAEEL Putative glycerophosphocholine phosphodiesterase GPCPD1 homolog 1 OS=Caenorhabditis elegans OX=6239 GN=gpcp-1 PE=3 SV=2
Potra2n10c20562	-1.61163	Downregulated	5	0.229	0.375	7.59317e-07
Potra2n15c28670	-1.61137	Downregulated	5	0.134	0.276	3.57292e-06	AT3G47470	light-harvesting chlorophyll-protein complex I subunit A4|CAB4,LHCA4	sp|P08975|LH15_EUGGR Light-harvesting complex I LH35 proteins (Fragment) OS=Euglena gracilis OX=3039 PE=2 SV=1
Potra2n16c30286	-1.61041	Downregulated	5	0.046	0.143	0.00253129	AT1G03430	histidine-containing phosphotransfer factor 5|AHP5	sp|Q9LU15|AHP4_ARATH Histidine-containing phosphotransfer protein 4 OS=Arabidopsis thaliana OX=3702 GN=AHP4 PE=1 SV=2
Potra2n5c10696	-1.60208	Downregulated	5	0.113	0.222	0.00279422	AT2G34430	light-harvesting chlorophyll-protein complex II subunit B1|LHB1B1,LHCB1.4	sp|Q03965|LI181_CHLMO Chlorophyll a-b binding protein LI818, chloroplastic OS=Chlamydomonas moewusii OX=3054 GN=LI818 PE=2 SV=1
Potra2n2c4118	-1.58634	Downregulated	5	0.316	0.559	5.54105e-22	AT2G20260	photosystem I subunit E-2|PSAE-2	sp|Q7V2X3|PSAE_PROMP Photosystem I reaction center subunit IV OS=Prochlorococcus marinus subsp. pastoris (strain CCMP1986 / NIES-2087 / MED4) OX=59919 GN=psaE PE=3 SV=1
Potra2n6c14724	-1.57988	Downregulated	5	0.15	0.337	3.54258e-10
Potra2n10c20444	-1.57902	Downregulated	5	0.203	0.395	2.4031e-11	AT3G54890	chlorophyll a-b binding protein 6|LHCA1	sp|Q03965|LI181_CHLMO Chlorophyll a-b binding protein LI818, chloroplastic OS=Chlamydomonas moewusii OX=3054 GN=LI818 PE=2 SV=1
Potra2n14c27801	-1.54402	Downregulated	5	0.256	0.464	2.94962e-14	AT1G61520	PSI type III chlorophyll a/b-binding protein|LHCA3	sp|P12332|CB21_SILLB Chlorophyll a-b binding protein, chloroplastic (Fragment) OS=Silene latifolia subsp. alba OX=52853 PE=2 SV=2
Potra2n8c18309	-1.52278	Downregulated	5	0.095	0.209	0.000989003	AT1G67740	photosystem II BY|PSBY,YCF32	sp|O49347|PSBY_ARATH Photosystem II core complex proteins psbY, chloroplastic OS=Arabidopsis thaliana OX=3702 GN=PSBY PE=2 SV=1
Potra2n5c11003	-1.51722	Downregulated	5	0.27	0.485	2.53346e-15	AT1G06680	photosystem II subunit P-1|OE23,OEE2,PSBP-1,PSII-P	sp|O49344|PSBP2_ARATH Putative oxygen-evolving enhancer protein 2-2 OS=Arabidopsis thaliana OX=3702 GN=PSBP2 PE=5 SV=3
Potra2n5c11652	-1.51427	Downregulated	5	0.139	0.276	1.14087e-05	AT3G50820	photosystem II subunit O-2|OEC33,PSBO-2,PSBO2	sp|P84718|PSBO_PINST Putative oxygen-evolving enhancer protein 1 (Fragments) OS=Pinus strobus OX=3348 GN=PSBO PE=1 SV=2
Potra2n6c13067	-1.49644	Downregulated	5	0.24	0.421	3.90501e-11	AT1G30380	photosystem I subunit K|PSAK	sp|P42051|PSAK_CUCSA Photosystem I reaction center subunit psaK, chloroplastic (Fragment) OS=Cucumis sativus OX=3659 GN=PSAK PE=1 SV=1
Potra2n3c8005	-1.49003	Downregulated	5	0.372	0.618	5.95968e-25	AT1G52230	photosystem I subunit H2|PSAH-2,PSAH2,PSI-H	sp|P13352|PSAH_CHLRE Photosystem I reaction center subunit VI, chloroplastic OS=Chlamydomonas reinhardtii OX=3055 GN=PSAH PE=1 SV=1
Potra2n12c24569	-1.41809	Downregulated	5	0.187	0.357	3.37784e-08	AT5G50720	HVA22 homologue E|ATHVA22E,HVA22E	sp|Q75A56|YOP1_ASHGO Protein YOP1 OS=Ashbya gossypii (strain ATCC 10895 / CBS 109.51 / FGSC 9923 / NRRL Y-1056) OX=284811 GN=YOP1 PE=3 SV=2
Potra2n8c18017	-1.41544	Downregulated	5	0.18	0.356	1.14794e-08	AT4G02770	photosystem I subunit D-1|PSAD-1	sp|P84563|PSAD_POPEU Photosystem I reaction center subunit II (Fragment) OS=Populus euphratica OX=75702 GN=psaD PE=1 SV=1
Potra2n1c2433	-1.40622	Downregulated	5	0.316	0.533	6.40616e-17	AT1G07120	CHUP1-like protein	sp|Q9LI74|CHUP1_ARATH Protein CHUP1, chloroplastic OS=Arabidopsis thaliana OX=3702 GN=CHUP1 PE=1 SV=1
Potra2n14c27834	-1.40125	Downregulated	5	0.356	0.549	7.97438e-17	AT4G12800	photosystem I subunit l|PSAL	sp|Q7NIE7|PSAL_GLOVI Photosystem I reaction center subunit XI OS=Gloeobacter violaceus (strain ATCC 29082 / PCC 7421) OX=251221 GN=psaL PE=1 SV=1
Potra2n13c25697	-1.39468	Downregulated	5	0.54	0.692	7.82578e-17
Potra2n5c12725	-1.38674	Downregulated	5	0.441	0.688	3.89587e-29	AT1G56580	plant/protein (Protein of unknown function, DUF538)|SVB
Potra2n13c24943	-1.38598	Downregulated	5	0.099	0.209	0.00370746	AT3G10860	Cytochrome b-c1 complex, subunit 8 protein	sp|Q9FLB7|UCRQ2_ARATH Cytochrome b-c1 complex subunit 8-2, mitochondrial OS=Arabidopsis thaliana OX=3702 GN=UCRQ-2 PE=1 SV=1
Potra2n12c24367	-1.38393	Downregulated	5	0.386	0.53	2.18852e-08	AT5G14920	Gibberellin-regulated family protein	sp|P46690|GASA4_ARATH Gibberellin-regulated protein 4 OS=Arabidopsis thaliana OX=3702 GN=GASA4 PE=1 SV=2
Potra2n3c6944	-1.38151	Downregulated	5	0.261	0.457	1.42251e-12	AT3G61470	photosystem I light harvesting complex protein|LHCA2	sp|Q39709|FCP_ISOGA Fucoxanthin-chlorophyll a-c binding protein, chloroplastic OS=Isochrysis galbana OX=37099 GN=FCP PE=1 SV=1
Potra2n5c10749	-1.3801	Downregulated	5	0.365	0.537	3.88906e-12	AT4G16190	Papain family cysteine protease	sp|P32954|CYSP1_VASCU Cysteine proteinase 1 (Fragment) OS=Vasconcellea cundinamarcensis OX=35926 PE=1 SV=1
Potra2n11c22600	-1.37233	Downregulated	5	0.27	0.443	6.83124e-10	AT1G79040	photosystem II subunit R|PSBR	sp|A0A2K3DMP5|PSBR_CHLRE Photosystem II protein PSBR, chloroplastic OS=Chlamydomonas reinhardtii OX=3055 GN=PSBR PE=1 SV=1
Potra2n1c230	-1.35948	Downregulated	5	0.254	0.48	4.86221e-15	AT3G27890	NADPH:quinone oxidoreductase|NQR	sp|Q74HL7|NFR1_LACJO NADH-dependent flavin reductase subunit 1 OS=Lactobacillus johnsonii (strain CNCM I-12250 / La1 / NCC 533) OX=257314 GN=nfr1 PE=1 SV=1
Potra2n2c4696	-1.35916	Downregulated	5	0.822	0.919	2.36165e-42	AT4G01850	S-adenosylmethionine synthetase 2|AtSAM2,MAT2,SAM-2,SAM2	sp|P47293|METK_MYCGE S-adenosylmethionine synthase OS=Mycoplasma genitalium (strain ATCC 33530 / G-37 / NCTC 10195) OX=243273 GN=metK PE=3 SV=1
Potra2n14c27719	-1.3352	Downregulated	5	0.995	0.992	4.6802e-42
Potra2n1c3480	-1.32886	Downregulated	5	0.924	0.956	8.08256e-62	AT3G15290	3-hydroxyacyl-CoA dehydrogenase family protein	sp|Q92HC9|Y842_RICCN Putative uncharacterized protein RC0842 OS=Rickettsia conorii (strain ATCC VR-613 / Malish 7) OX=272944 GN=RC0842 PE=5 SV=1
Potra2n13c26260	-1.31811	Downregulated	5	0.229	0.396	7.43945e-08	AT1G56700	Peptidase C15, pyroglutamyl peptidase I-like protein	sp|Q8XXE9|PCP1_RALSO Pyrrolidone-carboxylate peptidase 1 OS=Ralstonia solanacearum (strain GMI1000) OX=267608 GN=pcp1 PE=3 SV=1
Potra2n7c16335	-1.31313	Downregulated	5	0.298	0.51	4.17224e-14	AT3G50820	photosystem II subunit O-2|OEC33,PSBO-2,PSBO2	sp|P84718|PSBO_PINST Putative oxygen-evolving enhancer protein 1 (Fragments) OS=Pinus strobus OX=3348 GN=PSBO PE=1 SV=2
Potra2n3c6646	-1.30217	Downregulated	5	0.3	0.51	1.07285e-14	AT2G41430	dehydration-induced protein (ERD15)|CID1,ERD15,LSR1	sp|Q94AR4|CID2_ARATH Polyadenylate-binding protein-interacting protein 2 OS=Arabidopsis thaliana OX=3702 GN=CID2 PE=2 SV=1
Potra2n1c4008	-1.27707	Downregulated	5	0.176	0.299	0.000511341	AT1G55680	Transducin/WD40 repeat-like superfamily protein
Potra2n1c2238	-1.25433	Downregulated	5	0.194	0.337	2.54498e-05	AT1G51400	Photosystem II 5 kD protein	sp|P31336|PST2_GOSHI Photosystem II 5 kDa protein, chloroplastic OS=Gossypium hirsutum OX=3635 GN=PSBT PE=4 SV=1
Potra2n6c14040	-1.24634	Downregulated	5	0.43	0.628	2.56362e-17	AT5G12080	mechanosensitive channel of small conductance-like 10|ATMSL10,MSL10	sp|F4IME1|MSL7_ARATH Mechanosensitive ion channel protein 7 OS=Arabidopsis thaliana OX=3702 GN=MSL7 PE=2 SV=1
Potra2n4c9930	-1.24361	Downregulated	5	0.536	0.717	4.48288e-22	AT2G21180	transmembrane protein
Potra2n15c28782	-1.2298	Downregulated	5	0.217	0.342	0.000334275	AT5G16110	hypothetical protein
Potra2n16c29402	-1.22399	Downregulated	5	0.226	0.37	1.06789e-05	AT3G22200	Pyridoxal phosphate (PLP)-dependent transferases superfamily protein|GABA-T,HER1,POP2	sp|H8WR05|BFAT_VARPD Beta-phenylalanine transaminase OS=Variovorax paradoxus OX=34073 PE=1 SV=1
Potra2n11c22560	-1.21487	Downregulated	5	0.148	0.26	0.00579553
Potra2n16c29511	-1.2045	Downregulated	5	0.145	0.279	0.000162702	AT4G09550	AtGCP3 interacting protein 1|ATGIP1,GIP1	sp|Q2GVR6|MZT1_CHAGB Mitotic-spindle organizing protein 1 OS=Chaetomium globosum (strain ATCC 6205 / CBS 148.51 / DSM 1962 / NBRC 6347 / NRRL 1970) OX=306901 GN=CHGG_07938 PE=3 SV=1
Potra2n2c5318	-1.18063	Downregulated	5	0.764	0.902	8.9508e-50	AT2G23090	Uncharacterized protein family SERF	sp|O64818|Y2309_ARATH Uncharacterized protein At2g23090 OS=Arabidopsis thaliana OX=3702 GN=At2g23090 PE=1 SV=1
Potra2n11c22739	-1.17254	Downregulated	5	0.166	0.292	0.000501716	AT5G54270	light-harvesting chlorophyll B-binding protein 3|LHCB3,LHCB3*1	sp|Q40301|FCPE_MACPY Fucoxanthin-chlorophyll a-c binding protein E, chloroplastic OS=Macrocystis pyrifera OX=35122 GN=FCPE PE=2 SV=1
Potra2n16c30474	-1.14069	Downregulated	5	0.178	0.308	0.000533548	AT2G38370	weak chloroplast movement under blue light protein (DUF827)	sp|O48724|WEB1_ARATH Protein WEAK CHLOROPLAST MOVEMENT UNDER BLUE LIGHT 1 OS=Arabidopsis thaliana OX=3702 GN=WEB1 PE=1 SV=1
Potra2n8c17951	-1.1175	Downregulated	5	0.339	0.482	2.25158e-06	AT1G14520	myo-inositol oxygenase 1|MIOX1	sp|Q9QXN4|MIOX_RAT Inositol oxygenase OS=Rattus norvegicus OX=10116 GN=Miox PE=1 SV=2
Potra2n10c21328	-1.11581	Downregulated	5	0.291	0.426	1.43199e-05	AT1G68540	NAD(P)-binding Rossmann-fold superfamily protein	sp|O06485|YFNG_BACSU Putative sugar dehydratase/epimerase YfnG OS=Bacillus subtilis (strain 168) OX=224308 GN=yfnG PE=3 SV=2
Potra2n14c26657	-1.10837	Downregulated	5	0.619	0.799	1.82853e-34
Potra2n11c23049	-1.10316	Downregulated	5	0.344	0.512	5.9952e-10
Potra2n10c20744	-1.10229	Downregulated	5	0.303	0.456	2.96855e-07	AT2G40110	Yippee family putative zinc-binding protein	sp|O44440|YPL2_CAEEL Protein yippee-like B0546.4 OS=Caenorhabditis elegans OX=6239 GN=B0546.4 PE=3 SV=1
Potra2n1c3684	-1.07074	Downregulated	5	0.469	0.65	1.80702e-16	AT1G65980	thioredoxin-dependent peroxidase 1|TPX1	sp|P38013|AHP1_YEAST Peroxiredoxin AHP1 OS=Saccharomyces cerevisiae (strain ATCC 204508 / S288c) OX=559292 GN=AHP1 PE=1 SV=4
Potra2n9c19877	-1.07057	Downregulated	5	0.187	0.317	0.000998193	AT5G59305	CLAVATA 3/ESR (CLE)-like protein	sp|Q8LDN4|CLE46_ARATH CLAVATA3/ESR (CLE)-related protein 46 OS=Arabidopsis thaliana OX=3702 GN=CLE46 PE=3 SV=1
Potra2n12c24371	-1.06444	Downregulated	5	0.252	0.387	0.000105406	AT5G62575	succinate dehydrogenase subunit	sp|Q6H611|SDH7_ORYSJ Succinate dehydrogenase subunit 7, mitochondrial OS=Oryza sativa subsp. japonica OX=39947 GN=SDH7 PE=1 SV=1
Potra2n1c3775	-1.05965	Downregulated	5	0.206	0.336	0.000764784	AT1G08340	Rho GTPase activating protein with PAK-box/P21-Rho-binding domain-containing protein	sp|Q54Y72|GACA_DICDI Rho GTPase-activating protein gacA OS=Dictyostelium discoideum OX=44689 GN=gacA PE=3 SV=1
Potra2n3c7310	-1.05793	Downregulated	5	0.61	0.698	1.12447e-13	AT4G23496	SPIRAL1-like5|SP1L5	sp|Q9S7P8|SP1L3_ARATH Protein SPIRAL1-like 3 OS=Arabidopsis thaliana OX=3702 GN=SP1L3 PE=1 SV=1
Potra2n1c2905	-1.04151	Downregulated	5	0.261	0.4	7.20084e-05	AT1G63290	Aldolase-type TIM barrel family protein	sp|P39362|SGCE_ECOLI Protein SgcE OS=Escherichia coli (strain K12) OX=83333 GN=sgcE PE=3 SV=1
Potra2n16c29443	-1.03428	Downregulated	5	0.467	0.633	3.30698e-16	AT3G56490	HIS triad family protein 3|HINT1,HIT3	sp|P95937|YHIT_SACS2 Uncharacterized HIT-like protein SSO2163 OS=Saccharolobus solfataricus (strain ATCC 35092 / DSM 1617 / JCM 11322 / P2) OX=273057 GN=SSO2163 PE=4 SV=1
Potra2n10c20425	-1.03321	Downregulated	5	0.677	0.816	8.19947e-33	AT5G42300	ubiquitin-like protein 5|UBL5	sp|Q756X3|HUB1_ASHGO Ubiquitin-like modifier HUB1 OS=Ashbya gossypii (strain ATCC 10895 / CBS 109.51 / FGSC 9923 / NRRL Y-1056) OX=284811 GN=HUB1 PE=4 SV=1
Potra2n14c27804	-1.03082	Downregulated	5	0.328	0.509	5.41917e-10	AT5G48335	hypothetical protein
Potra2n16c29998	-1.02945	Downregulated	5	0.374	0.541	1.03322e-09	AT5G02640	hypothetical protein
Potra2n10c21086	-1.02236	Downregulated	5	0.333	0.482	4.36307e-06	AT3G17210	heat stable protein 1	sp|Q9FK81|Y5258_ARATH Stress-response A/B barrel domain-containing protein At5g22580 OS=Arabidopsis thaliana OX=3702 GN=At5g22580 PE=1 SV=1
Potra2n14c27648	-1.01938	Downregulated	5	0.499	0.674	3.14291e-18	AT2G32520	alpha/beta-Hydrolases superfamily protein	sp|Q8X8L4|DLHH_ECO57 Putative carboxymethylenebutenolidase OS=Escherichia coli O157:H7 OX=83334 GN=ysgA PE=3 SV=1
Potra2n4c9939	-1.01858	Downregulated	5	0.995	0.992	3.07342e-40	AT2G21130	Cyclophilin-like peptidyl-prolyl cis-trans isomerase family protein	sp|O53021|PPIA_DICD3 Peptidyl-prolyl cis-trans isomerase A OS=Dickeya dadantii (strain 3937) OX=198628 GN=rotA PE=3 SV=2
Potra2n17c31354	-1.00852	Downregulated	5	0.559	0.748	6.28816e-24	AT1G64750	deletion of SUV3 suppressor 1(I)|ATDSS1(I),DSS1(I)	sp|Q9XIR8|SEM11_ARATH Protein DELETION OF SUV3 SUPPRESSOR 1(I) OS=Arabidopsis thaliana OX=3702 GN=DSS1(I) PE=1 SV=1
Potra2n4c10455	-1.00809	Downregulated	5	0.298	0.435	2.29795e-05	AT2G02390	glutathione S-transferase zeta 1	sp|Q9Y7Q2|GST1_SCHPO Glutathione S-transferase 1 OS=Schizosaccharomyces pombe (strain 972 / ATCC 24843) OX=284812 GN=gst1 PE=2 SV=1
Potra2n1c3246	-1.0079	Downregulated	5	0.326	0.502	5.26744e-09	AT3G13200	Cwf15 / Cwc15 cell cycle control family protein|EMB2769	sp|Q6C0E6|CWC15_YARLI Pre-mRNA-splicing factor CWC15 OS=Yarrowia lipolytica (strain CLIB 122 / E 150) OX=284591 GN=CWC15 PE=3 SV=1
Potra2n9c18821	1.00015	Upregulated	5	0.132	0.053	0.00492846	AT2G27810	nucleobase-ascorbate transporter 12	sp|P45117|URAA_HAEIN Probable uracil permease OS=Haemophilus influenzae (strain ATCC 51907 / DSM 11121 / KW20 / Rd) OX=71421 GN=uraA PE=3 SV=1
Potra2n3c7388	1.00204	Upregulated	5	0.868	0.562	3.64144e-33	AT1G63120	RHOMBOID-like 2|ATRBL2,RBL2	sp|Q9FFX0|RBL9_ARATH RHOMBOID-like protein 9, chloroplastic OS=Arabidopsis thaliana OX=3702 GN=RBL9 PE=2 SV=1
Potra2n2c5360	1.00316	Upregulated	5	0.557	0.304	4.3021e-17	AT3G49780	phytosulfokine 4 precursor|ATPSK3 (FORMER SYMBOL),ATPSK4,PSK4	sp|Q9FEB4|PSK5_ARATH Phytosulfokines 5 OS=Arabidopsis thaliana OX=3702 GN=PSK5 PE=2 SV=1
Potra2n6c14735	1.00365	Upregulated	5	0.252	0.128	3.97333e-05	AT2G38670	phosphorylethanolamine cytidylyltransferase 1|PECT1	sp|D9PX81|RIBL_METTM FAD synthase OS=Methanothermobacter marburgensis (strain ATCC BAA-927 / DSM 2133 / JCM 14651 / NBRC 100331 / OCM 82 / Marburg) OX=79929 GN=ribL PE=3 SV=1
Potra2n6c14408	1.00546	Upregulated	5	0.543	0.3	5.85368e-16	AT5G01710	methyltransferase
Potra2n9c19467	1.00596	Upregulated	5	0.776	0.523	1.75072e-26	AT4G37990	cinnamyl alcohol dehydrogenase 8|ATCAD8,CAD-B2,ELI3,ELI3-2	sp|Q2MF22|DOIAD_STRSD 2-deoxy-scyllo-inosamine dehydrogenase OS=Streptoalloteichus tenebrarius (strain ATCC 17920 / DSM 40477 / NCIB 11028) OX=1933 GN=tobE PE=3 SV=1
Potra2n18c32629	1.00775	Upregulated	5	0.485	0.245	2.21737e-15	AT3G24440	Fibronectin type III domain-containing protein	sp|Q5BPT4|VIL3_ARATH VIN3-like protein 3 OS=Arabidopsis thaliana OX=3702 GN=VIL3 PE=2 SV=1
Potra2n19c34419	1.00883	Upregulated	5	0.217	0.085	1.83711e-08
Potra2n4c8420	1.00955	Upregulated	5	0.293	0.139	2.68147e-08	AT4G22330	Alkaline phytoceramidase (aPHC)|ATCES1	sp|Q8R4X1|ACER1_MOUSE Alkaline ceramidase 1 OS=Mus musculus OX=10090 GN=Acer1 PE=1 SV=1
Potra2n12c24069	1.01276	Upregulated	5	0.554	0.297	3.9237e-17	AT1G68090	annexin 5	sp|Q9UJ72|ANX10_HUMAN Annexin A10 OS=Homo sapiens OX=9606 GN=ANXA10 PE=1 SV=3
Potra2n7c16374	1.01311	Upregulated	5	0.152	0.065	0.00147521	AT5G49530	SIN-like family protein	sp|O74883|RPC5_SCHPO DNA-directed RNA polymerase III subunit rpc5 OS=Schizosaccharomyces pombe (strain 972 / ATCC 24843) OX=284812 GN=rpc37 PE=3 SV=1
Potra2n8c17117	1.01416	Upregulated	5	0.261	0.113	2.01472e-08	AT2G39650	cruciferin (DUF506)
Potra2n4c9436	1.01424	Upregulated	5	0.166	0.072	0.000730076	AT3G02360	6-phosphogluconate dehydrogenase family protein	sp|O34969|YFJR_BACSU Uncharacterized oxidoreductase YfjR OS=Bacillus subtilis (strain 168) OX=224308 GN=yfjR PE=3 SV=2
Potra2n8c18380	1.01619	Upregulated	5	0.266	0.137	2.02127e-05	AT1G70370	polygalacturonase 2|PG2	sp|Q5Z5C9|BURPB_ORYSJ BURP domain-containing protein 11 OS=Oryza sativa subsp. japonica OX=39947 GN=BURP11 PE=2 SV=1
Potra2n18c33188	1.01751	Upregulated	5	0.189	0.093	0.00287249	AT2G24540	Galactose oxidase/kelch repeat superfamily protein|AFR	sp|Q9M1Y1|SKI20_ARATH F-box/kelch-repeat protein SKIP20 OS=Arabidopsis thaliana OX=3702 GN=SKIP20 PE=1 SV=1
Potra2n13c25800	1.01813	Upregulated	5	0.834	0.601	3.21004e-30
Potra2n4c8455	1.01984	Upregulated	5	0.527	0.281	5.63121e-17	AT4G22120	ERD (early-responsive to dehydration stress) family protein	sp|X1WEM4|CSC1_DANRE Calcium permeable stress-gated cation channel 1 OS=Danio rerio OX=7955 GN=tmem63c PE=3 SV=1
Potra2n1c885	1.02022	Upregulated	5	0.887	0.604	1.46907e-40	AT4G11600	glutathione peroxidase 6|ATGPX6,GPX6,LSC803,PHGPX	sp|P35666|GPXC_WUCBA Cuticular glutathione peroxidase OS=Wuchereria bancrofti OX=6293 PE=2 SV=1
Potra2n2c6421	1.0212	Upregulated	5	0.418	0.229	1.24487e-10	AT1G76490	hydroxy methylglutaryl CoA reductase 1|HMG1,HMGR1	sp|O28538|HMDH_ARCFU 3-hydroxy-3-methylglutaryl-coenzyme A reductase OS=Archaeoglobus fulgidus (strain ATCC 49558 / VC-16 / DSM 4304 / JCM 9628 / NBRC 100126) OX=224325 GN=hmgA PE=3 SV=1
Potra2n15c28587	1.02225	Upregulated	5	0.767	0.442	4.87936e-29
Potra2n16c29414	1.02241	Upregulated	5	0.157	0.065	0.000439191	AT4G16660	heat shock protein 70 (Hsp 70) family protein	sp|Q05945|HSP70_HYDOL Heat shock 70 kDa protein (Fragment) OS=Hydra oligactis OX=6088 GN=HSP70 PE=3 SV=1
Potra2n1c1543	1.02414	Upregulated	5	0.379	0.207	9.49277e-09	AT1G80300	nucleotide transporter 1|ATNTT1,NTT1	sp|Q8SUG0|NTT3_ENCCU ADP,ATP carrier protein 3 OS=Encephalitozoon cuniculi (strain GB-M1) OX=284813 GN=NTT3 PE=1 SV=1
Potra2n8c17803	1.02462	Upregulated	5	0.201	0.104	0.00379431	AT2G01290	ribose-5-phosphate isomerase 2|RPI2	sp|Q9YEA9|RPIA_AERPE Ribose-5-phosphate isomerase A OS=Aeropyrum pernix (strain ATCC 700893 / DSM 11879 / JCM 9820 / NBRC 100138 / K1) OX=272557 GN=rpiA PE=3 SV=1
Potra2n13c24932	1.02575	Upregulated	5	0.199	0.093	0.00016525	AT1G09575	calcium uniporter-like protein (DUF607)	sp|Q9NWR8|MCUB_HUMAN Calcium uniporter regulatory subunit MCUb, mitochondrial OS=Homo sapiens OX=9606 GN=MCUB PE=1 SV=2
Potra2n4c9935	1.0268	Upregulated	5	0.439	0.218	4.79787e-14	AT2G21160	Translocon-associated protein (TRAP), alpha subunit	sp|Q54R45|SSRA_DICDI Translocon-associated protein subunit alpha OS=Dictyostelium discoideum OX=44689 GN=ssr1 PE=3 SV=1
Potra2n16c30555	1.02749	Upregulated	5	0.268	0.116	5.89168e-09	AT5G44460	calmodulin like 43|CML43	sp|P53683|CDPKJ_ORYSJ Calcium-dependent protein kinase 19 OS=Oryza sativa subsp. japonica OX=39947 GN=CPK19 PE=2 SV=2
Potra2n18c32251	1.02789	Upregulated	5	0.242	0.114	4.35501e-06	AT5G35160	Endomembrane protein 70 protein family	sp|P40071|TMN3_YEAST Transmembrane 9 superfamily member 3 OS=Saccharomyces cerevisiae (strain ATCC 204508 / S288c) OX=559292 GN=TMN3 PE=1 SV=1
Potra2n1c2695	1.02885	Upregulated	5	0.776	0.438	8.50017e-31	AT5G64300	GTP cyclohydrolase II|ATGCH,ATRIBA1,GCH,RFD1	sp|Q6YFE5|URC1_LACKL Putative GTP cyclohydrolase URC1 OS=Lachancea kluyveri OX=4934 GN=URC1 PE=3 SV=1
Potra2n10c20159	1.03079	Upregulated	5	0.252	0.11	5.37488e-08	AT3G21220	MAP kinase kinase 5	sp|Q9J523|V212_FOWPN Probable serine/threonine-protein kinase FPV212 OS=Fowlpox virus (strain NVSL) OX=928301 GN=FPV212 PE=3 SV=1
Potra2n5c11738	1.03459	Upregulated	5	0.166	0.071	0.000302075	AT3G50950	HOPZ-ACTIVATED RESISTANCE 1|ZAR1	sp|Q9LRT1|Y3804_ARATH Probably inactive leucine-rich repeat receptor-like protein kinase At3g28040 OS=Arabidopsis thaliana OX=3702 GN=At3g28040 PE=1 SV=1
Potra2n1c2023	1.03924	Upregulated	5	0.155	0.062	0.000209305	AT1G07870	Protein kinase superfamily protein	sp|Q63132|ROS1_RAT Proto-oncogene tyrosine-protein kinase ROS OS=Rattus norvegicus OX=10116 GN=Ros1 PE=2 SV=1
Potra2n2c5308	1.03933	Upregulated	5	0.57	0.269	2.769e-25	AT4G37400	cytochrome P450, family 81, subfamily F, polypeptide 3|CYP81F3	sp|H2KYS3|DAF9_CAEEL Cytochrome P450 daf-9 OS=Caenorhabditis elegans OX=6239 GN=daf-9 PE=1 SV=1
Potra2n2c5261	1.04025	Upregulated	5	0.337	0.14	5.27682e-14	AT4G25000	alpha-amylase-like protein|AMY1,ATAMY1	sp|Q02751|MALT_CANAX Alpha-glucosidase OS=Candida albicans OX=5476 GN=MAL2 PE=1 SV=4
Potra2n3c7979	1.0405	Upregulated	5	0.379	0.196	1.09238e-10	AT1G79930	heat shock protein 91|HSP91	sp|P86265|HS74L_MESAU Heat shock 70 kDa protein 4L (Fragments) OS=Mesocricetus auratus OX=10036 GN=HSPA4L PE=1 SV=1
Potra2n11c23190	1.04124	Upregulated	5	0.316	0.147	6.86259e-10	AT1G06410	trehalose-phosphatase/synthase 7	sp|Q67XC9|TPPD_ARATH Probable trehalose-phosphate phosphatase D OS=Arabidopsis thaliana OX=3702 GN=TPPD PE=2 SV=1
Potra2n8c17983	1.04205	Upregulated	5	0.487	0.243	5.86052e-17	AT2G02860	sucrose transporter 2|ATSUC3,ATSUT2,SUC3,SUT2	sp|Q0P5V9|S45A4_MOUSE Solute carrier family 45 member 4 OS=Mus musculus OX=10090 GN=Slc45a4 PE=1 SV=1
Potra2n6c13778	1.05031	Upregulated	5	0.564	0.265	7.80279e-23	AT2G18660	plant natriuretic peptide A|PNP-A	sp|Q9M0C2|EGC1_ARATH Putative EG45-like domain containing protein 1 OS=Arabidopsis thaliana OX=3702 GN=EGC1 PE=3 SV=1
Potra2n16c30230	1.05186	Upregulated	5	0.552	0.296	5.82723e-19	AT3G54000	TIP41-like protein
Potra2n7c16427	1.05285	Upregulated	5	0.349	0.159	1.4544e-11	AT4G36550	ARM repeat superfamily protein	sp|Q8S8S7|PUB34_ARATH U-box domain-containing protein 34 OS=Arabidopsis thaliana OX=3702 GN=PUB34 PE=3 SV=1
Potra2n6c15133	1.05489	Upregulated	5	0.49	0.248	9.36249e-17	AT3G56880	VQ motif-containing protein	sp|O80683|CAB25_ARATH Calmodulin-binding protein 25 OS=Arabidopsis thaliana OX=3702 GN=CAMBP25 PE=1 SV=1
Potra2n2c4811	1.05695	Upregulated	5	0.245	0.095	3.76629e-10	AT2G46620	P-loop containing nucleoside triphosphate hydrolases superfamily protein	sp|Q01939|PRS8_YEAST 26S proteasome regulatory subunit 8 homolog OS=Saccharomyces cerevisiae (strain ATCC 204508 / S288c) OX=559292 GN=RPT6 PE=1 SV=4
Potra2n1c3018	1.06118	Upregulated	5	0.333	0.165	4.43834e-09	AT5G50180	Protein kinase superfamily protein	sp|C0LGH8|Y1634_ARATH Probable LRR receptor-like serine/threonine-protein kinase At1g63430 OS=Arabidopsis thaliana OX=3702 GN=At1g63430 PE=1 SV=1
Potra2n14c27517	1.06234	Upregulated	5	0.801	0.532	2.3316e-29	AT1G52140	Avr9/Cf-9 rapidly elicited protein
Potra2n9c18979	1.06332	Upregulated	5	0.212	0.098	3.33751e-05	AT4G38710	glycine-rich protein	sp|Q9SAD7|IF4B2_ARATH Eukaryotic translation initiation factor 4B2 OS=Arabidopsis thaliana OX=3702 GN=EIF4B2 PE=1 SV=1
Potra2n11c22567	1.06389	Upregulated	5	0.3	0.137	1.52881e-09	AT1G76520	Auxin efflux carrier family protein	sp|Q9C999|PILS2_ARATH Protein PIN-LIKES 2 OS=Arabidopsis thaliana OX=3702 GN=PILS2 PE=2 SV=1
Potra2n10c21741	1.06525	Upregulated	5	0.552	0.303	4.23498e-18	AT4G14640	calmodulin 8|CAM8	sp|D3GME4|PRVB_SCOSC Parvalbumin beta OS=Scomber scombrus OX=13677 GN=pvalb PE=1 SV=1
Potra2n6c14800	1.06544	Upregulated	5	0.196	0.095	0.000716594	AT5G35200	ENTH/ANTH/VHS superfamily protein	sp|P53309|AP18B_YEAST Clathrin coat assembly protein AP180B OS=Saccharomyces cerevisiae (strain ATCC 204508 / S288c) OX=559292 GN=YAP1802 PE=1 SV=1
Potra2n10c21656	1.07004	Upregulated	5	0.134	0.053	0.00194802	AT3G05990	Leucine-rich repeat (LRR) family protein	sp|Q9FK66|RLP55_ARATH Receptor-like protein 55 OS=Arabidopsis thaliana OX=3702 GN=RLP55 PE=1 SV=1
Potra2n1c1476	1.07055	Upregulated	5	0.85	0.521	1.08495e-36	AT1G17420	lipoxygenase 3|LOX3	sp|T0JRM4|MNLOX_COLGC Manganese lipoxygenase OS=Colletotrichum gloeosporioides (strain Cg-14) OX=1237896 GN=CGLO_15145 PE=1 SV=1
Potra2n12c24758	1.07188	Upregulated	5	0.799	0.466	1.41693e-35	AT5G62350	Plant invertase/pectin methylesterase inhibitor superfamily protein	sp|Q9LXK7|PME32_ARATH Probable pectinesterase/pectinesterase inhibitor 32 OS=Arabidopsis thaliana OX=3702 GN=PME32 PE=2 SV=1
Potra2n584s36054	1.07209	Upregulated	5	0.741	0.437	7.45854e-29	AT4G11260	phosphatase-like protein|ATSGT1B,EDM1,ETA3,RPR1,SGT1B	sp|Q8IZP2|ST134_HUMAN Putative protein FAM10A4 OS=Homo sapiens OX=9606 GN=ST13P4 PE=5 SV=1
Potra2n19c33327	1.07244	Upregulated	5	0.4	0.193	1.87702e-12	AT4G03210	xyloglucan endotransglucosylase/hydrolase 9|XTH9	sp|P04957|GUB_BACSU Beta-glucanase OS=Bacillus subtilis (strain 168) OX=224308 GN=bglS PE=1 SV=2
Potra2n197s34882	1.07276	Upregulated	5	0.192	0.075	8.16882e-07	AT3G14075	Mono-/di-acylglycerol lipase, N-terminal;Lipase, class 3	sp|Q91WC9|DGLB_MOUSE Sn1-specific diacylglycerol lipase beta OS=Mus musculus OX=10090 GN=Daglb PE=1 SV=2
Potra2n114s34573	1.07392	Upregulated	5	0.187	0.084	0.000119478	AT2G35100	Exostosin family protein|ARAD1	sp|Q10SX7|GT31_ORYSJ Probable glucuronosyltransferase Os03g0107900 OS=Oryza sativa subsp. japonica OX=39947 GN=Os03g0107900 PE=2 SV=1
Potra2n3c7548	1.07668	Upregulated	5	0.471	0.231	1.36131e-16	AT5G61480	Leucine-rich repeat protein kinase family protein|PXY	sp|Q9SNA3|Y3463_ARATH Putative receptor-like protein kinase At3g46340 OS=Arabidopsis thaliana OX=3702 GN=At3g46340 PE=1 SV=1
Potra2n5c11398	1.0842	Upregulated	5	0.249	0.115	7.48988e-07	AT5G64260	EXORDIUM like 2|EXL2	sp|Q9M8T8|EXOL6_ARATH Protein EXORDIUM-like 6 OS=Arabidopsis thaliana OX=3702 GN=EXL6 PE=3 SV=1
Potra2n10c21629	1.08634	Upregulated	5	0.143	0.06	0.00227161	AT1G26850	S-adenosyl-L-methionine-dependent methyltransferases superfamily protein	sp|Q9C9Q8|PMTT_ARATH Probable pectin methyltransferase QUA2 OS=Arabidopsis thaliana OX=3702 GN=QUA2 PE=1 SV=2
Potra2n4c9805	1.08644	Upregulated	5	0.39	0.197	3.70964e-11	AT4G34480	O-Glycosyl hydrolases family 17 protein	sp|Q06915|EA6_ARATH Probable glucan endo-1,3-beta-glucosidase A6 OS=Arabidopsis thaliana OX=3702 GN=A6 PE=2 SV=1
Potra2n6c14220	1.08957	Upregulated	5	0.956	0.694	1.37766e-54	AT5G03380	Heavy metal transport/detoxification superfamily protein	sp|Q0WV37|HIP34_ARATH Heavy metal-associated isoprenylated plant protein 34 OS=Arabidopsis thaliana OX=3702 GN=HIPP34 PE=2 SV=1
Potra2n8c17042	1.08972	Upregulated	5	0.162	0.072	0.00174543	AT3G12360	Ankyrin repeat family protein	sp|Q9BXW6|OSBL1_HUMAN Oxysterol-binding protein-related protein 1 OS=Homo sapiens OX=9606 GN=OSBPL1A PE=1 SV=2
Potra2n7c15785	1.09509	Upregulated	5	0.589	0.293	2.21452e-24	AT5G64030	S-adenosyl-L-methionine-dependent methyltransferases superfamily protein	sp|Q3EC77|PMT5_ARATH Probable methyltransferase PMT5 OS=Arabidopsis thaliana OX=3702 GN=At2g03480 PE=2 SV=2
Potra2n7c15767	1.09549	Upregulated	5	0.215	0.09	8.80258e-07	AT4G33440	Pectin lyase-like superfamily protein	sp|O74213|PGLR1_ASPAC Endopolygalacturonase I OS=Aspergillus aculeatus OX=5053 GN=pgaI PE=1 SV=1
Potra2n12c24306	1.09637	Upregulated	5	0.212	0.081	2.13518e-08	AT3G47730	ATP-binding cassette A2|ABCA2,ATATH1,ATH1	sp|Q2NTI7|ZNUC_SODGM Zinc import ATP-binding protein ZnuC OS=Sodalis glossinidius (strain morsitans) OX=343509 GN=znuC PE=3 SV=1
Potra2n9c19402	1.0984	Upregulated	5	0.273	0.122	7.08899e-09	AT5G64510	tunicamycin induced protein
Potra2n18c33182	1.1006	Upregulated	5	0.543	0.287	1.40155e-18	AT5G24890	stress response NST1-like protein
Potra2n751s36681	1.10681	Upregulated	5	1	0.993	5.63648e-112
Potra2n6c13265	1.10751	Upregulated	5	0.291	0.137	1.72363e-08	AT5G26030	ferrochelatase 1|ATFC-I,FC-I,FC1	sp|B1VXN6|HEMH_STRGG Ferrochelatase OS=Streptomyces griseus subsp. griseus (strain JCM 4626 / NBRC 13350) OX=455632 GN=hemH PE=3 SV=1
Potra2n5c11803	1.10759	Upregulated	5	0.159	0.067	0.000281955	AT5G66210	calcium-dependent protein kinase 28|CPK28	sp|Q9C823|Y1523_ARATH C-type lectin receptor-like tyrosine-protein kinase At1g52310 OS=Arabidopsis thaliana OX=3702 GN=At1g52310 PE=2 SV=1
Potra2n5c12314	1.10772	Upregulated	5	0.649	0.354	2.65659e-23	AT1G53570	mitogen-activated protein kinase kinase kinase 3|MAP3KA,MAPKKK3	sp|O76695|VER2_CAEEL Protein ver-2 OS=Caenorhabditis elegans OX=6239 GN=ver-2 PE=2 SV=2
Potra2n6c14404	1.10946	Upregulated	5	0.63	0.35	1.27895e-22	AT3G03280	hypothetical protein
Potra2n2c4185	1.11071	Upregulated	5	0.434	0.205	2.25281e-15	AT3G25140	Nucleotide-diphospho-sugar transferases superfamily protein|GAUT8,QUA1	sp|A0A0H2URA3|GLYB_STRPN Glycosyltransferase GlyB OS=Streptococcus pneumoniae serotype 4 (strain ATCC BAA-334 / TIGR4) OX=170187 GN=glyB PE=3 SV=1
Potra2n7c16438	1.11078	Upregulated	5	0.15	0.06	0.000258844	AT4G36520	Chaperone DnaJ-domain superfamily protein	sp|O14976|GAK_HUMAN Cyclin-G-associated kinase OS=Homo sapiens OX=9606 GN=GAK PE=1 SV=2
Potra2n10c20592	1.11085	Upregulated	5	0.986	0.881	8.75985e-84	AT5G02500	heat shock cognate protein 70-1|AT-HSC70-1,HSC70,HSC70-1,HSP70-1	sp|P86237|HS71L_MESAU Heat shock 70 kDa protein 1-like (Fragments) OS=Mesocricetus auratus OX=10036 GN=HSPA1L PE=1 SV=1
Potra2n5c12618	1.11138	Upregulated	5	0.469	0.223	1.10668e-17	AT3G16640	translationally controlled tumor protein|TCTP	sp|Q94587|TCTP_HYDVU Translationally-controlled tumor protein homolog OS=Hydra vulgaris OX=6087 PE=2 SV=1
Potra2n16c29706	1.11272	Upregulated	5	0.566	0.282	8.47098e-23
Potra2n2c5376	1.11561	Upregulated	5	0.219	0.102	1.58449e-05	AT3G30390	Transmembrane amino acid transporter family protein	sp|O74327|AVT5_SCHPO Vacuolar amino acid transporter 5 OS=Schizosaccharomyces pombe (strain 972 / ATCC 24843) OX=284812 GN=avt5 PE=3 SV=1
Potra2n8c17097	1.11616	Upregulated	5	0.185	0.082	0.000157716	AT3G12570	FYD|FYD
Potra2n5c11635	1.11943	Upregulated	5	0.628	0.381	8.77502e-20	AT2G23620	methyl esterase 1|ATMES1,MES1	sp|C0LA90|PYRHY_SPHWJ Pyrethroid hydrolase OS=Sphingobium wenxiniae (strain DSM 21828 / JZ-1) OX=595605 GN=pytH PE=1 SV=1
Potra2n3c7463	1.12207	Upregulated	5	0.273	0.127	3.40763e-08	AT1G12360	Sec1/munc18-like (SM) proteins superfamily|KEU	sp|Q8SS97|SLY1_ENCCU SEC1 family transport protein SLY1 OS=Encephalitozoon cuniculi (strain GB-M1) OX=284813 GN=SLY1 PE=1 SV=1
Potra2n1c3196	1.12264	Upregulated	5	0.584	0.299	4.38078e-23	AT3G13110	serine acetyltransferase 2;2|ATSERAT2;2,SAT-1,SAT-A,SAT-M,SAT3,SERAT2;2	sp|P28266|NODL_RHIME Nodulation protein L OS=Rhizobium meliloti (strain 1021) OX=266834 GN=nodL PE=3 SV=1
Potra2n12c23793	1.12771	Upregulated	5	0.501	0.238	2.44203e-20	AT4G27720	Major facilitator superfamily protein	sp|Q6DG19|MFSD5_DANRE Molybdate-anion transporter OS=Danio rerio OX=7955 GN=mfsd5 PE=2 SV=1
Potra2n10c20707	1.12802	Upregulated	5	0.212	0.093	3.44341e-06	AT3G11320	Nucleotide-sugar transporter family protein	sp|Q9SZ96|URGT5_ARATH UDP-rhamnose/UDP-galactose transporter 5 OS=Arabidopsis thaliana OX=3702 GN=URGT5 PE=1 SV=1
Potra2n18c32632	1.12959	Upregulated	5	0.61	0.299	9.51836e-27
Potra2n4c10288	1.13016	Upregulated	5	0.275	0.121	3.43508e-09	AT5G60760	P-loop containing nucleoside triphosphate hydrolases superfamily protein	sp|O57882|PGK2_PYRHO 2-phosphoglycerate kinase OS=Pyrococcus horikoshii (strain ATCC 700860 / DSM 12428 / JCM 9974 / NBRC 100139 / OT-3) OX=70601 GN=pgk2 PE=3 SV=1
Potra2n19c34065	1.13099	Upregulated	5	0.799	0.539	3.94867e-29
Potra2n4c8780	1.13278	Upregulated	5	0.187	0.077	9.99342e-06	AT3G58610	ketol-acid reductoisomerase	sp|Q47UP4|ILVC_COLP3 Ketol-acid reductoisomerase (NADP(+)) OS=Colwellia psychrerythraea (strain 34H / ATCC BAA-681) OX=167879 GN=ilvC PE=3 SV=1
Potra2n871s36857	1.13289	Upregulated	5	0.303	0.117	8.21963e-14	ATCG00800	structural constituent of ribosome	sp|P50893|RT19_TETSU Ribosomal protein S19, mitochondrial OS=Tetraselmis subcordiformis OX=3161 GN=RPS19 PE=3 SV=1
Potra2n6c14633	1.13308	Upregulated	5	0.37	0.183	3.64656e-11	AT4G28400	Protein phosphatase 2C family protein	sp|Q641Y6|PPM1J_RAT Protein phosphatase 1J OS=Rattus norvegicus OX=10116 GN=Ppm1j PE=1 SV=1
Potra2n234s35048	1.13635	Upregulated	5	0.506	0.234	7.01847e-21	AT1G67580	Protein kinase superfamily protein	sp|O61125|STK4_DICDI Serine/threonine-protein kinase 4 homolog A OS=Dictyostelium discoideum OX=44689 GN=krsA PE=1 SV=1
Potra2n6c14588	1.13663	Upregulated	5	0.33	0.135	2.00147e-14	AT2G28950	expansin A6|ATEXP6,ATEXPA6,ATHEXP ALPHA 1.8,EXPA6	sp|Q7KWS2|EXPL3_DICDI Expansin-like protein 3 OS=Dictyostelium discoideum OX=44689 GN=expl3 PE=2 SV=1
Potra2n17c31134	1.13802	Upregulated	5	0.312	0.141	2.25651e-10	AT5G15470	galacturonosyltransferase 14|GAUT14	sp|Q6DJM3|GL8D1_XENLA Glycosyltransferase 8 domain-containing protein 1 OS=Xenopus laevis OX=8355 GN=glt8d1 PE=2 SV=1
Potra2n4c9549	1.13882	Upregulated	5	0.122	0.046	0.00137619	AT5G39670	Calcium-binding EF-hand family protein	sp|P05936|TNNC1_COTJA Troponin C, slow skeletal and cardiac muscles OS=Coturnix japonica OX=93934 GN=TNNC1 PE=2 SV=1
Potra2n9c19465	1.13917	Upregulated	5	0.393	0.174	2.18217e-15
Potra2n17c30656	1.13977	Upregulated	5	0.33	0.147	8.48433e-12	AT4G25700	beta-hydroxylase 1	sp|P54973|CRTZ_PARSN Beta-carotene hydroxylase OS=Paracoccus sp. (strain N81106 / MBIC 01143) OX=81397 GN=crtZ PE=3 SV=1
Potra2n5c11390	1.14194	Upregulated	5	0.169	0.066	1.63784e-05	AT1G78230	Outer arm dynein light chain 1 protein	sp|F1R6I3|LRC39_DANRE Leucine-rich repeat-containing protein 39 OS=Danio rerio OX=7955 GN=lrrc39 PE=2 SV=2
Potra2n2c5377	1.14263	Upregulated	5	0.596	0.285	1.80376e-26	AT4G07960	Cellulose-synthase-like C12	sp|Q9WX61|BCSA3_KOMXY Cellulose synthase 1 catalytic subunit [UDP-forming] OS=Komagataeibacter xylinus OX=28448 GN=bcsAI PE=3 SV=1
Potra2n10c21016	1.14599	Upregulated	5	0.305	0.144	3.03726e-09	AT1G13900	Purple acid phosphatases superfamily protein	sp|Q9LX83|PPA19_ARATH Purple acid phosphatase 19 OS=Arabidopsis thaliana OX=3702 GN=PAP19 PE=2 SV=1
Potra2n1c1053	1.14661	Upregulated	5	0.196	0.09	8.18936e-05	AT4G17260	Lactate/malate dehydrogenase family protein	sp|Q43744|MDHM_BRANA Malate dehydrogenase, mitochondrial OS=Brassica napus OX=3708 GN=MDH PE=2 SV=1
Potra2n12c24118	1.1491	Upregulated	5	0.141	0.055	0.000535334	AT3G17980	Calcium-dependent lipid-binding (CaLB domain) family protein	sp|Q9M2T2|PP16A_ARATH 16 kDa phloem protein 1 OS=Arabidopsis thaliana OX=3702 GN=PP16-1 PE=1 SV=1
Potra2n1c1398	1.15135	Upregulated	5	0.367	0.159	7.96118e-15	AT5G44790	copper-exporting ATPase / responsive-to-antagonist 1 / copper-transporting ATPase (RAN1)|HMA7,RAN1	sp|Q9T0E0|PMAX_ARATH Putative ATPase, plasma membrane-like OS=Arabidopsis thaliana OX=3702 GN=At4g11730 PE=3 SV=1
Potra2n6c13811	1.15383	Upregulated	5	0.21	0.09	2.09591e-06	AT5G57710	Double Clp-N motif-containing P-loop nucleoside triphosphate hydrolases superfamily protein	sp|Q92MK7|CLPB_RHIME Chaperone protein ClpB OS=Rhizobium meliloti (strain 1021) OX=266834 GN=clpB PE=3 SV=1
Potra2n6c15178	1.15399	Upregulated	5	0.185	0.067	1.38082e-07	AT3G09270	glutathione S-transferase TAU 8|ATGSTU8,GSTU8	sp|Q9X4F7|MAAI_RHIME Maleylacetoacetate isomerase OS=Rhizobium meliloti (strain 1021) OX=266834 GN=maiA PE=3 SV=1
Potra2n4c10480	1.16184	Upregulated	5	0.187	0.08	2.99936e-05	AT4G19210	RNAse l inhibitor protein 2|ATRLI2,RLI2	sp|P44692|ZNUC_HAEIN Zinc import ATP-binding protein ZnuC OS=Haemophilus influenzae (strain ATCC 51907 / DSM 11121 / KW20 / Rd) OX=71421 GN=znuC PE=3 SV=1
Potra2n9c19703	1.16422	Upregulated	5	0.194	0.072	9.00791e-08	AT3G07600	Heavy metal transport/detoxification superfamily protein	sp|Q5PNZ7|HIP46_ARATH Heavy metal-associated isoprenylated plant protein 46 OS=Arabidopsis thaliana OX=3702 GN=HIPP46 PE=2 SV=1
Potra2n18c32766	1.16587	Upregulated	5	0.427	0.194	1.06678e-17	AT5G12010	nuclease	sp|Q5U538|HARB1_XENLA Putative nuclease HARBI1 OS=Xenopus laevis OX=8355 GN=harbi1 PE=2 SV=1
Potra2n1c549	1.17132	Upregulated	5	0.182	0.086	0.000925321	AT1G11680	CYTOCHROME P450 51G1|CYP51,CYP51A2,CYP51G1,EMB1738	sp|Q12609|STCF_EMENI Probable sterigmatocystin biosynthesis P450 monooxygenase stcF OS=Emericella nidulans (strain FGSC A4 / ATCC 38163 / CBS 112.46 / NRRL 194 / M139) OX=227321 GN=stcF PE=3 SV=3
Potra2n14c27198	1.17186	Upregulated	5	0.344	0.16	2.16052e-11	AT1G01050	pyrophosphorylase 1	sp|P87118|IPYR2_SCHPO Putative inorganic pyrophosphatase C3A12.02 OS=Schizosaccharomyces pombe (strain 972 / ATCC 24843) OX=284812 GN=SPAC3A12.02 PE=3 SV=1
Potra2n1c1022	1.1724	Upregulated	5	0.284	0.128	3.2219e-09	AT1G70250	receptor serine/threonine kinase
Potra2n4c9998	1.17348	Upregulated	5	0.372	0.159	4.97185e-16	AT4G38550	phospholipase-like protein (PEARLI 4) family protein
Potra2n2c4096	1.17498	Upregulated	5	0.155	0.062	0.00012595	AT2G20370	Exostosin family protein|KAM1,MUR3	sp|Q9SUW1|GT19_ARATH Probable xyloglucan galactosyltransferase GT19 OS=Arabidopsis thaliana OX=3702 GN=GT19 PE=2 SV=1
Potra2n9c18819	1.17552	Upregulated	5	0.187	0.09	0.000600901	AT1G08250	arogenate dehydratase 6|ADT6	sp|P32452|PHA2_YEAST Putative prephenate dehydratase OS=Saccharomyces cerevisiae (strain ATCC 204508 / S288c) OX=559292 GN=PHA2 PE=1 SV=3
Potra2n13c24942	1.18168	Upregulated	5	0.972	0.749	5.60041e-69	AT1G14320	Ribosomal protein L16p/L10e family protein|RPL10,RPL10A,SAC52	sp|Q74M84|RL10E_NANEQ 50S ribosomal protein L10e OS=Nanoarchaeum equitans (strain Kin4-M) OX=228908 GN=rpl10e PE=3 SV=1
Potra2n9c20037	1.18517	Upregulated	5	0.406	0.176	2.30323e-17	AT5G60760	P-loop containing nucleoside triphosphate hydrolases superfamily protein	sp|O57882|PGK2_PYRHO 2-phosphoglycerate kinase OS=Pyrococcus horikoshii (strain ATCC 700860 / DSM 12428 / JCM 9974 / NBRC 100139 / OT-3) OX=70601 GN=pgk2 PE=3 SV=1
Potra2n19c34129	1.18543	Upregulated	5	0.157	0.063	0.000125582	AT5G18280	apyrase 2|APY2,ATAPY2	sp|F4JSH1|APY7_ARATH Probable apyrase 7 OS=Arabidopsis thaliana OX=3702 GN=APY7 PE=2 SV=1
Potra2n7c15757	1.18611	Upregulated	5	0.155	0.065	0.000411338	AT1G53570	mitogen-activated protein kinase kinase kinase 3|MAP3KA,MAPKKK3	sp|Q54G28|YTYK1_DICDI Probable tyrosine-protein kinase DDB_G0290471 OS=Dictyostelium discoideum OX=44689 GN=DDB_G0290471 PE=3 SV=1
Potra2n7c15784	1.19004	Upregulated	5	0.159	0.067	0.000250155	AT5G20680	TRICHOME BIREFRINGENCE-LIKE 16	sp|Q9LY46|TBL29_ARATH Protein ESKIMO 1 OS=Arabidopsis thaliana OX=3702 GN=ESK1 PE=1 SV=1
Potra2n3c6993	1.19134	Upregulated	5	0.298	0.136	1.69241e-09	AT2G33490	hydroxyproline-rich glycoprotein family protein	sp|O22799|Y2349_ARATH Uncharacterized protein At2g33490 OS=Arabidopsis thaliana OX=3702 GN=At2g33490 PE=4 SV=2
Potra2n5c11911	1.19232	Upregulated	5	0.15	0.066	0.00279383	AT5G66010	RNA-binding (RRM/RBD/RNP motifs) family protein	sp|Q66JV4|R12BB_MOUSE RNA-binding protein 12B-B OS=Mus musculus OX=10090 GN=Rbm12b2 PE=2 SV=2
Potra2n10c22018	1.19551	Upregulated	5	0.344	0.155	1.40194e-12	AT1G12990	beta-1,4-N-acetylglucosaminyltransferase family protein	sp|Q09327|MGAT3_HUMAN Beta-1,4-mannosyl-glycoprotein 4-beta-N-acetylglucosaminyltransferase OS=Homo sapiens OX=9606 GN=MGAT3 PE=2 SV=3
Potra2n3c7764	1.19622	Upregulated	5	0.305	0.13	2.04056e-11	AT5G47070	Protein kinase superfamily protein	sp|Q54VU4|Y8013_DICDI Probable serine/threonine-protein kinase DDB_G0280133 OS=Dictyostelium discoideum OX=44689 GN=DDB_G0280133 PE=3 SV=1
Potra2n7c15841	1.19624	Upregulated	5	0.236	0.099	4.9695e-08	AT5G63770	diacylglycerol kinase 2|ATDGK2,DGK2	sp|P39074|BMRU_BACSU Putative lipid kinase BmrU OS=Bacillus subtilis (strain 168) OX=224308 GN=bmrU PE=1 SV=2
Potra2n2c5233	1.19741	Upregulated	5	0.139	0.053	0.000238062	AT4G33300	ADR1-like 1|ADR1-L1	sp|F4JT82|RPP2C_ARATH Probable disease resistance protein At4g19520 OS=Arabidopsis thaliana OX=3702 GN=At4g19520 PE=3 SV=1
Potra2n4c8835	1.19806	Upregulated	5	0.224	0.098	7.12783e-07	AT1G28440	HAESA-like 1|HSL1	sp|Q9SA25|WAKLG_ARATH Wall-associated receptor kinase-like 8 OS=Arabidopsis thaliana OX=3702 GN=WAKL8 PE=2 SV=1
Potra2n14c26591	1.19829	Upregulated	5	0.233	0.1	1.02774e-07	AT4G33300	ADR1-like 1|ADR1-L1	sp|Q1L8Y7|SHOC2_DANRE Leucine-rich repeat protein SHOC-2 OS=Danio rerio OX=7955 GN=shoc2 PE=2 SV=1
Potra2n9c18691	1.20037	Upregulated	5	0.614	0.299	1.10484e-27	AT2G27500	Glycosyl hydrolase superfamily protein	sp|P52397|E13J_TOBAC Glucan endo-1,3-beta-glucosidase, acidic isoform PR-O (Fragment) OS=Nicotiana tabacum OX=4097 GN=PR0 PE=1 SV=1
Potra2n15c28531	1.20065	Upregulated	5	0.859	0.511	1.47434e-43	AT5G62520	similar to RCD one 5|SRO5	sp|O82289|SRO1_ARATH Probable inactive poly [ADP-ribose] polymerase SRO1 OS=Arabidopsis thaliana OX=3702 GN=SRO1 PE=1 SV=2
Potra2n19c33976	1.2012	Upregulated	5	0.162	0.059	4.31431e-06	AT3G03140	Tudor/PWWP/MBT superfamily protein	sp|P59278|Y1745_ARATH Uncharacterized protein At1g51745 OS=Arabidopsis thaliana OX=3702 GN=At1g51745 PE=2 SV=2
Potra2n1c2486	1.20181	Upregulated	5	0.143	0.058	0.000812213	AT5G09590	mitochondrial HSO70 2|HSC70-5,MTHSC70-2	sp|C6DJ80|ZNTB_PECCP Zinc transport protein ZntB OS=Pectobacterium carotovorum subsp. carotovorum (strain PC1) OX=561230 GN=zntB PE=3 SV=1
Potra2n1c3805	1.20299	Upregulated	5	0.344	0.144	8.84318e-15	AT4G10490	2-oxoglutarate (2OG) and Fe(II)-dependent oxygenase superfamily protein	sp|Q8XPV7|EFE_RALSO 2-oxoglutarate-dependent ethylene/succinate-forming enzyme OS=Ralstonia solanacearum (strain GMI1000) OX=267608 GN=efe PE=3 SV=1
Potra2n5c10523	1.20461	Upregulated	5	0.577	0.302	1.37203e-24	AT1G76490	hydroxy methylglutaryl CoA reductase 1|HMG1,HMGR1	sp|Q59468|HMDH_HALVD 3-hydroxy-3-methylglutaryl-coenzyme A reductase OS=Haloferax volcanii (strain ATCC 29605 / DSM 3757 / JCM 8879 / NBRC 14742 / NCIMB 2012 / VKM B-1768 / DS2) OX=309800 GN=hmgA PE=1 SV=2
Potra2n18c32322	1.20601	Upregulated	5	0.642	0.316	3.95801e-29	AT4G30600	signal recognition particle receptor alpha subunit family protein	sp|O52256|FLHF_PSEPU Flagellar biosynthesis protein FlhF OS=Pseudomonas putida OX=303 GN=flhF PE=3 SV=1
Potra2n19c33793	1.20645	Upregulated	5	0.353	0.127	3.31792e-19	AT1G71360	Galactose-binding protein	sp|Q710E6|SUCO_RAT SUN domain-containing ossification factor OS=Rattus norvegicus OX=10116 GN=Suco PE=2 SV=1
Potra2n1c2071	1.20733	Upregulated	5	0.448	0.212	3.75465e-18	AT2G28890	poltergeist like 4|PLL4	sp|Q9XGZ9|P2C72_ARATH Probable protein phosphatase 2C 72 OS=Arabidopsis thaliana OX=3702 GN=At5g26010 PE=2 SV=2
Potra2n15c28407	1.21356	Upregulated	5	0.171	0.059	1.07761e-07	AT4G24780	Pectin lyase-like superfamily protein	sp|B1B6T1|PTLY_BACSP Pectate trisaccharide-lyase OS=Bacillus sp. OX=1409 GN=pel PE=1 SV=1
Potra2n8c17884	1.21546	Upregulated	5	0.212	0.086	7.8555e-08	AT1G68020	UDP-Glycosyltransferase / trehalose-phosphatase family protein|ATTPS6,TPS6	sp|Q8SSL0|TPP_ENCCU Probable trehalose-phosphatase OS=Encephalitozoon cuniculi (strain GB-M1) OX=284813 GN=ECU01_0870 PE=1 SV=1
Potra2n18c32855	1.21585	Upregulated	5	0.55	0.265	2.92325e-24	AT1G79750	NADP-malic enzyme 4|ATNADP-ME4,NADP-ME4	sp|P16468|MAOX_GEOSE NAD-dependent malic enzyme OS=Geobacillus stearothermophilus OX=1422 PE=1 SV=1
Potra2n8c17475	1.21588	Upregulated	5	0.113	0.041	0.00243347	AT2G03480	QUASIMODO2 LIKE 2|QUL2	sp|Q6NPR7|PMTO_ARATH Probable methyltransferase PMT24 OS=Arabidopsis thaliana OX=3702 GN=At1g29470 PE=2 SV=1
Potra2n6c13536	1.21626	Upregulated	5	0.46	0.191	2.6395e-23	AT5G06320	NDR1/HIN1-like 3|NHL3	sp|Q8LD98|NHL6_ARATH NDR1/HIN1-like protein 6 OS=Arabidopsis thaliana OX=3702 GN=NHL6 PE=1 SV=1
Potra2n13c25086	1.21952	Upregulated	5	0.12	0.039	8.17277e-05	AT4G03415	Protein phosphatase 2C family protein	sp|P35182|PP2C1_YEAST Protein phosphatase 2C homolog 1 OS=Saccharomyces cerevisiae (strain ATCC 204508 / S288c) OX=559292 GN=PTC1 PE=1 SV=1
Potra2n3c7126	1.22285	Upregulated	5	0.206	0.092	1.34191e-05
Potra2n1c1161	1.22407	Upregulated	5	0.455	0.197	7.41908e-21	AT3G03050	cellulose synthase(cesa)-like D3|ATCSLD3,CSLD3,KJK	sp|P58931|BCSA_PSEFS Cellulose synthase catalytic subunit [UDP-forming] OS=Pseudomonas fluorescens (strain SBW25) OX=216595 GN=bcsA PE=3 SV=2
Potra2n5c10585	1.22454	Upregulated	5	0.115	0.045	0.00829806	AT5G42320	Zn-dependent exopeptidases superfamily protein	sp|Q5U901|CBPA6_MOUSE Carboxypeptidase A6 OS=Mus musculus OX=10090 GN=Cpa6 PE=2 SV=1
Potra2n4c9185	1.2263	Upregulated	5	0.236	0.11	1.99962e-06	AT3G59990	methionine aminopeptidase 2B|MAP2B	sp|P44421|MAP1_HAEIN Methionine aminopeptidase OS=Haemophilus influenzae (strain ATCC 51907 / DSM 11121 / KW20 / Rd) OX=71421 GN=map PE=3 SV=1
Potra2n15c29219	1.22709	Upregulated	5	0.379	0.167	1.45207e-15	AT5G24660	response to low sulfur 2|LSU2	sp|Q9SCK2|LSU3_ARATH Protein RESPONSE TO LOW SULFUR 3 OS=Arabidopsis thaliana OX=3702 GN=LSU3 PE=4 SV=1
Potra2n2c4501	1.22899	Upregulated	5	0.139	0.054	0.00044794			sp|O59793|ESS2_SCHPO Stress response protein bis1 OS=Schizosaccharomyces pombe (strain 972 / ATCC 24843) OX=284812 GN=bis1 PE=1 SV=1
Potra2n13c25215	1.23328	Upregulated	5	0.984	0.701	1.48357e-69	AT3G54420	homolog of carrot EP3-3 chitinase|ATCHITIV,ATEP3,CHIV,EP3	sp|Q9MA41|CTL1_ARATH Chitinase-like protein 1 OS=Arabidopsis thaliana OX=3702 GN=CTL1 PE=1 SV=1
Potra2n4c10170	1.23591	Upregulated	5	0.656	0.34	5.9452e-30	AT5G22250	Polynucleotidyl transferase, ribonuclease H-like superfamily protein	sp|Q9LXM4|CAF1H_ARATH Putative CCR4-associated factor 1 homolog 8 OS=Arabidopsis thaliana OX=3702 GN=CAF1-8 PE=3 SV=1
Potra2n8c18360	1.23956	Upregulated	5	0.346	0.145	3.06246e-15	AT1G10740	alpha/beta-Hydrolases superfamily protein	sp|Q8NUI5|LIP1_STAAW Lipase 1 OS=Staphylococcus aureus (strain MW2) OX=196620 GN=lip1 PE=3 SV=2
Potra2n8c17674	1.24117	Upregulated	5	0.106	0.033	0.000212173	AT1G68750	phosphoenolpyruvate carboxylase 4|ATPPC4,PPC4	sp|Q49136|CAPP_METEA Phosphoenolpyruvate carboxylase OS=Methylorubrum extorquens (strain ATCC 14718 / DSM 1338 / JCM 2805 / NCIMB 9133 / AM1) OX=272630 GN=ppc PE=3 SV=2
Potra2n6c13387	1.2413	Upregulated	5	0.115	0.045	0.00924601	AT2G26310	Chalcone-flavanone isomerase family protein	sp|Q9M1X2|FAP1_ARATH Fatty-acid-binding protein 1 OS=Arabidopsis thaliana OX=3702 GN=FAP1 PE=1 SV=1
Potra2n10c21892	1.24687	Upregulated	5	0.658	0.314	1.39144e-32	AT3G23920	beta-amylase 1|BAM1,BMY7,TR-BAMY	sp|P30271|AMYB_SECCE Beta-amylase (Fragment) OS=Secale cereale OX=4550 GN=BMY1 PE=2 SV=1
Potra2n1c890	1.24855	Upregulated	5	0.834	0.48	1.60806e-45	AT3G48990	AMP-dependent synthetase and ligase family protein	sp|Q4H424|PERA_EPIFF Peramine synthetase OS=Epichloe festucae (strain Fl1) OX=877507 GN=perA PE=2 SV=2
Potra2n2c5469	1.2513	Upregulated	5	0.677	0.355	3.78848e-31	AT2G22500	uncoupling protein 5	sp|Q54BF6|MCFN_DICDI Mitochondrial substrate carrier family protein N OS=Dictyostelium discoideum OX=44689 GN=mcfN PE=1 SV=2
Potra2n288s35210	1.25334	Upregulated	5	0.289	0.121	1.76854e-11	AT1G79750	NADP-malic enzyme 4|ATNADP-ME4,NADP-ME4	sp|P54572|MAO1_BACSU Probable NAD-dependent malic enzyme 1 OS=Bacillus subtilis (strain 168) OX=224308 GN=yqkJ PE=3 SV=1
Potra2n1c680	1.25531	Upregulated	5	0.125	0.045	0.000332222	AT5G42090	Lung seven transmembrane receptor family protein	sp|Q6P6V6|GP108_RAT Protein GPR108 OS=Rattus norvegicus OX=10116 GN=Gpr108 PE=2 SV=1
Potra2n18c32862	1.25706	Upregulated	5	0.171	0.078	0.000945921	AT5G11650	alpha/beta-Hydrolases superfamily protein	sp|Q5ALW7|PPME1_CANAL Protein phosphatase methylesterase 1 OS=Candida albicans (strain SC5314 / ATCC MYA-2876) OX=237561 GN=PPE1 PE=3 SV=1
Potra2n6c12963	1.26254	Upregulated	5	0.279	0.116	2.55415e-11	AT5G10840	Endomembrane protein 70 protein family	sp|Q7YTA6|PHG1C_DICDI Putative phagocytic receptor 1c OS=Dictyostelium discoideum OX=44689 GN=phg1c PE=2 SV=1
Potra2n8c17894	1.2665	Upregulated	5	0.734	0.367	1.98101e-39	AT5G37490	ARM repeat superfamily protein	sp|Q9CAA7|PUB42_ARATH Putative U-box domain-containing protein 42 OS=Arabidopsis thaliana OX=3702 GN=PUB42 PE=3 SV=1
Potra2n8c17640	1.26857	Upregulated	5	0.697	0.328	1.86803e-37	AT1G68710	ATPase E1-E2 type family protein / haloacid dehalogenase-like hydrolase family protein	sp|O74431|ATC9_SCHPO Probable cation-transporting ATPase C1672.11c OS=Schizosaccharomyces pombe (strain 972 / ATCC 24843) OX=284812 GN=SPCC1672.11c PE=3 SV=1
Potra2n15c28674	1.26869	Upregulated	5	0.199	0.08	8.13054e-07	AT1G74380	xyloglucan xylosyltransferase 5|XXT5	sp|P50108|MNN10_YEAST Probable alpha-1,6-mannosyltransferase MNN10 OS=Saccharomyces cerevisiae (strain ATCC 204508 / S288c) OX=559292 GN=MNN10 PE=1 SV=1
Potra2n13c25717	1.2688	Upregulated	5	0.51	0.246	3.12195e-20	AT1G28760	guanosine-3',5'-bis (diphosphate) 3'-pyrophosphohydrolase, putative (DUF2215)
Potra2n10c20733	1.27439	Upregulated	5	0.416	0.18	2.02982e-18	AT2G40000	ortholog of sugar beet HS1 PRO-1 2|ATHSPRO2,HSPRO2	sp|Q9LY61|HSPR1_ARATH Nematode resistance protein-like HSPRO1 OS=Arabidopsis thaliana OX=3702 GN=HSPRO1 PE=1 SV=1
Potra2n4c8787	1.27453	Upregulated	5	0.139	0.057	0.00114161	AT4G20980	Eukaryotic translation initiation factor 3 subunit 7 (eIF-3)	sp|Q6C1N1|EIF3D_YARLI Eukaryotic translation initiation factor 3 subunit D OS=Yarrowia lipolytica (strain CLIB 122 / E 150) OX=284591 GN=YALI0F14839g PE=3 SV=1
Potra2n16c29897	1.27795	Upregulated	5	0.43	0.171	2.87602e-22	AT5G06320	NDR1/HIN1-like 3|NHL3	sp|Q9ZVD2|NHL13_ARATH NDR1/HIN1-like protein 13 OS=Arabidopsis thaliana OX=3702 GN=NHL13 PE=2 SV=1
Potra2n14c26579	1.28081	Upregulated	5	0.125	0.038	3.70606e-06	AT4G11800	Calcineurin-like metallo-phosphoesterase superfamily protein
Potra2n5c10782	1.28479	Upregulated	5	0.293	0.12	4.37972e-12	AT2G21520	Sec14p-like phosphatidylinositol transfer family protein	sp|Q06705|CSR1_YEAST Phosphatidylinositol transfer protein CSR1 OS=Saccharomyces cerevisiae (strain ATCC 204508 / S288c) OX=559292 GN=CSR1 PE=1 SV=1
Potra2n10c22052	1.28645	Upregulated	5	0.173	0.061	1.22265e-07	AT1G70520	cysteine-rich RLK (RECEPTOR-like protein kinase) 2|CRK2	sp|Q55CW3|SAMKA_DICDI Probable serine/threonine-protein kinase samkA OS=Dictyostelium discoideum OX=44689 GN=samkA PE=3 SV=1
Potra2n2c5596	1.29426	Upregulated	5	0.178	0.065	1.97285e-07	AT1G77810	Galactosyltransferase family protein	sp|Q6AY39|B3GL1_RAT UDP-GalNAc:beta-1,3-N-acetylgalactosaminyltransferase 1 OS=Rattus norvegicus OX=10116 GN=B3galnt1 PE=2 SV=1
Potra2n1c173	1.29656	Upregulated	5	0.425	0.174	6.24719e-21	AT2G41540	6-phosphogluconate dehydrogenase family protein|GPDHC1	sp|Q4ZUV7|GPDA_PSEU2 Glycerol-3-phosphate dehydrogenase [NAD(P)+] OS=Pseudomonas syringae pv. syringae (strain B728a) OX=205918 GN=gpsA PE=3 SV=1
Potra2n11c22450	1.30047	Upregulated	5	0.393	0.134	8.31072e-25	AT2G34790	FAD-binding Berberine family protein|EDA28,MEE23	sp|P30986|RETO_ESCCA Reticuline oxidase OS=Eschscholzia californica OX=3467 GN=BBE1 PE=1 SV=1
Potra2n7c16022	1.30103	Upregulated	5	0.162	0.062	1.49466e-05	AT1G48920	nucleolin like 1|ATNUC-L1,NUC-L1,PARL1	sp|P42696|RBM34_HUMAN RNA-binding protein 34 OS=Homo sapiens OX=9606 GN=RBM34 PE=1 SV=2
Potra2n3c7886	1.30737	Upregulated	5	0.356	0.127	6.17142e-20	AT1G53840	pectin methylesterase 1|ATPME1,PME1	sp|P24791|PME_RALSL Pectinesterase OS=Ralstonia solanacearum OX=305 GN=pme PE=3 SV=1
Potra2n16c30518	1.30789	Upregulated	5	0.159	0.06	8.21538e-06	AT3G08720	serine/threonine protein kinase 2	sp|Q555U5|Y4821_DICDI Probable inactive serine/threonine-protein kinase DDB_G0274821 OS=Dictyostelium discoideum OX=44689 GN=DDB_G0274821 PE=3 SV=1
Potra2n2c5682	1.30976	Upregulated	5	0.106	0.027	1.72085e-06	AT1G44130	Eukaryotic aspartyl protease family protein	sp|Q766C3|NEP1_NEPGR Aspartic proteinase nepenthesin-1 OS=Nepenthes gracilis OX=150966 GN=nep1 PE=1 SV=1
Potra2n17c30809	1.3098	Upregulated	5	0.734	0.362	1.81782e-41	AT1G66480	plastid movement impaired 2|PMI2	sp|Q6NLC8|Y1648_ARATH Uncharacterized protein At1g66480 OS=Arabidopsis thaliana OX=3702 GN=At1g66480 PE=2 SV=1
Potra2n5c11261	1.31644	Upregulated	5	0.143	0.05	1.25997e-05	AT1G21740	DUF630 family protein, putative (DUF630 and DUF632)	sp|Q9AQW1|REL2_ORYSJ Protein ROLLING AND ERECT LEAF 2 OS=Oryza sativa subsp. japonica OX=39947 GN=REL2 PE=2 SV=1
Potra2n18c32703	1.31751	Upregulated	5	0.141	0.056	0.000477986	AT2G06050	oxophytodienoate-reductase 3|DDE1,OPR3	sp|Q48303|DHDM_HYPSX Dimethylamine dehydrogenase OS=Hyphomicrobium sp. (strain x) OX=79673 GN=dmd PE=3 SV=3
Potra2n10c20764	1.31773	Upregulated	5	0.744	0.393	6.74005e-42
Potra2n507s35843	1.32034	Upregulated	5	0.242	0.09	2.31888e-11	AT4G26690	PLC-like phosphodiesterase family protein|GPDL2,MRH5,SHV3	sp|Q9LVN0|GPDL7_ARATH Glycerophosphodiester phosphodiesterase GDPDL7 OS=Arabidopsis thaliana OX=3702 GN=GDPDL7 PE=2 SV=1
Potra2n2c5105	1.32078	Upregulated	5	0.111	0.04	0.00255895	AT3G60690	SAUR-like auxin-responsive protein family	sp|B7F8P5|SAU39_ORYSJ Auxin-responsive protein SAUR36 OS=Oryza sativa subsp. japonica OX=39947 GN=SAUR39 PE=2 SV=1
Potra2n17c31454	1.32127	Upregulated	5	0.111	0.042	0.00624175	AT2G32810	beta galactosidase 9|BGAL9	sp|P22031|LEG_HELCR D-galactoside-specific lectin OS=Heliocidaris crassispina OX=1043166 PE=1 SV=1
Potra2n18c32574	1.32502	Upregulated	5	0.339	0.136	3.29772e-16	AT3G24550	proline extensin-like receptor kinase 1|ATPERK1,PERK1	sp|P36583|PCK2_SCHPO Protein kinase C-like 2 OS=Schizosaccharomyces pombe (strain 972 / ATCC 24843) OX=284812 GN=pck2 PE=1 SV=2
Potra2n18c32072	1.32646	Upregulated	5	0.127	0.046	0.000309676	AT3G23750	Leucine-rich repeat protein kinase family protein	sp|Q10078|PPK13_SCHPO Serine/threonine-protein kinase ppk13 OS=Schizosaccharomyces pombe (strain 972 / ATCC 24843) OX=284812 GN=ppk13 PE=3 SV=2
Potra2n5c10624	1.32963	Upregulated	5	0.173	0.067	3.25872e-06	AT5G11880	Pyridoxal-dependent decarboxylase family protein	sp|Q92445|DCOR_PARBR Ornithine decarboxylase (Fragment) OS=Paracoccidioides brasiliensis OX=121759 GN=ODC PE=3 SV=1
Potra2n6c14513	1.33158	Upregulated	5	0.533	0.236	1.14003e-26	AT3G54040	PAR1 protein
Potra2n2c4701	1.33377	Upregulated	5	0.18	0.066	1.8742e-07	AT3G62220	Protein kinase superfamily protein	sp|P35916|VGFR3_HUMAN Vascular endothelial growth factor receptor 3 OS=Homo sapiens OX=9606 GN=FLT4 PE=1 SV=3
Potra2n13c26142	1.33409	Upregulated	5	0.557	0.257	9.74638e-29	AT1G09070	soybean gene regulated by cold-2|(AT)SRC2,SRC2	sp|O04133|SRC2_SOYBN Protein SRC2 OS=Glycine max OX=3847 GN=SRC2 PE=2 SV=1
Potra2n10c22000	1.33441	Upregulated	5	0.268	0.091	9.82458e-15	AT5G14420	RING domain ligase2|RGLG2	sp|Q1ZXB3|CPNF_DICDI Copine-F OS=Dictyostelium discoideum OX=44689 GN=cpnF PE=2 SV=1
Potra2n3c6915	1.33464	Upregulated	5	0.102	0.031	0.000330205	AT2G33205	Serinc-domain containing serine and sphingolipid biosynthesis protein	sp|Q86VE9|SERC5_HUMAN Serine incorporator 5 OS=Homo sapiens OX=9606 GN=SERINC5 PE=2 SV=1
Potra2n1c3167	1.34437	Upregulated	5	0.18	0.073	7.07679e-06	AT1G30320	Remorin family protein
Potra2n17c31530	1.34534	Upregulated	5	0.141	0.054	0.000183644	AT5G64290	dicarboxylate transport 2.1|DCT,DIT2.1	sp|C0LGQ4|MDIS2_ARATH Protein MALE DISCOVERER 2 OS=Arabidopsis thaliana OX=3702 GN=MDIS2 PE=1 SV=1
Potra2n12c24142	1.3502	Upregulated	5	0.176	0.071	8.77032e-06	AT1G18040	cyclin-dependent kinase D1;3|AT;CDCKD;3,CAK2AT,CDKD1;3	sp|Q54I36|PYK3_DICDI Dual specificity protein kinase pyk3 OS=Dictyostelium discoideum OX=44689 GN=pyk3 PE=1 SV=1
Potra2n2c5449	1.35471	Upregulated	5	0.15	0.061	0.000149276	AT1G09970	Leucine-rich receptor-like protein kinase family protein|LRR XI-23,RLK7	sp|O75716|STK16_HUMAN Serine/threonine-protein kinase 16 OS=Homo sapiens OX=9606 GN=STK16 PE=1 SV=4
Potra2n4c10242	1.35593	Upregulated	5	0.132	0.046	5.10469e-05	AT1G76490	hydroxy methylglutaryl CoA reductase 1|HMG1,HMGR1	sp|Q58116|HMDH_METJA 3-hydroxy-3-methylglutaryl-coenzyme A reductase OS=Methanocaldococcus jannaschii (strain ATCC 43067 / DSM 2661 / JAL-1 / JCM 10045 / NBRC 100440) OX=243232 GN=hmgA PE=3 SV=1
Potra2n19c34260	1.3648	Upregulated	5	0.106	0.038	0.00359273
Potra2n14c26598	1.36506	Upregulated	5	0.256	0.102	8.80876e-11	AT1G06870	Peptidase S24/S26A/S26B/S26C family protein	sp|O74800|IMP1_SCHPO Mitochondrial inner membrane protease subunit 1 OS=Schizosaccharomyces pombe (strain 972 / ATCC 24843) OX=284812 GN=imp1 PE=3 SV=1
Potra2n5c11849	1.36549	Upregulated	5	0.303	0.117	1.42738e-14	AT2G17760	Eukaryotic aspartyl protease family protein	sp|Q8RVH5|7SBG2_SOYBN Basic 7S globulin 2 OS=Glycine max OX=3847 PE=1 SV=1
Potra2n1c825	1.3702	Upregulated	5	0.293	0.118	7.14794e-13	AT4G11280	1-aminocyclopropane-1-carboxylic acid (acc) synthase 6|ACS6,ATACS6	sp|P71348|ALAA_HAEIN Glutamate-pyruvate aminotransferase AlaA OS=Haemophilus influenzae (strain ATCC 51907 / DSM 11121 / KW20 / Rd) OX=71421 GN=alaA PE=3 SV=1
Potra2n18c33235	1.3731	Upregulated	5	0.411	0.155	1.21861e-22	AT4G31290	ChaC-like family protein	sp|P39163|CHAC_ECOLI Glutathione-specific gamma-glutamylcyclotransferase OS=Escherichia coli (strain K12) OX=83333 GN=chaC PE=1 SV=3
Potra2n11c22682	1.37611	Upregulated	5	0.644	0.278	7.09534e-39	AT5G54650	formin homology5|ATFH5,Fh5	sp|Q9VUC6|FRL_DROME Formin-like protein OS=Drosophila melanogaster OX=7227 GN=Frl PE=1 SV=3
Potra2n548s35914	1.377	Upregulated	5	0.113	0.04	0.00121709	AT5G54590	Protein kinase superfamily protein|CRLK1	sp|Q09831|PPK14_SCHPO Serine/threonine-protein kinase ppk14 OS=Schizosaccharomyces pombe (strain 972 / ATCC 24843) OX=284812 GN=ppk14 PE=1 SV=1
Potra2n4c10032	1.38215	Upregulated	5	0.388	0.15	1.43573e-20	AT1G76160	SKU5 similar 5|sks5	sp|A0A0B2WJN5|MLAC1_METAS Laccase 1 OS=Metarhizium album (strain ARSEF 1941) OX=1081103 GN=Mlac1 PE=3 SV=1
Potra2n8c17375	1.38295	Upregulated	5	0.33	0.117	5.8806e-19	AT3G19830	Calcium-dependent lipid-binding (CaLB domain) family protein
Potra2n16c29645	1.38618	Upregulated	5	0.145	0.057	0.000131984	AT3G12120	fatty acid desaturase 2|FAD2	sp|P48627|FAD6C_BRANA Omega-6 fatty acid desaturase, chloroplastic OS=Brassica napus OX=3708 PE=1 SV=1
Potra2n10c21924	1.38818	Upregulated	5	0.111	0.039	0.00156134	AT1G24330	ARM repeat superfamily protein	sp|Q0DR28|PUB57_ORYSJ U-box domain-containing protein 57 OS=Oryza sativa subsp. japonica OX=39947 GN=PUB57 PE=2 SV=1
Potra2n2c4100	1.38903	Upregulated	5	0.143	0.051	1.09558e-05	AT1G04120	multidrug resistance-associated protein 5	sp|Q1Q889|ZNUC_PSYCK Zinc import ATP-binding protein ZnuC OS=Psychrobacter cryohalolentis (strain K5) OX=335284 GN=znuC PE=3 SV=2
Potra2n17c30608	1.3918	Upregulated	5	0.129	0.046	0.000113605	AT3G17650	YELLOW STRIPE like 5|PDE321,YSL5	sp|P53134|YGL4_YEAST Putative oligopeptide transporter YGL114W OS=Saccharomyces cerevisiae (strain ATCC 204508 / S288c) OX=559292 GN=YGL114W PE=1 SV=1
Potra2n6c15263	1.3924	Upregulated	5	0.845	0.47	1.31307e-54	AT5G47550	Cystatin/monellin superfamily protein	sp|Q8LC76|CYT7_ARATH Cysteine proteinase inhibitor 7 OS=Arabidopsis thaliana OX=3702 GN=CYS7 PE=2 SV=2
Potra2n1c940	1.39316	Upregulated	5	0.109	0.039	0.00213942	AT1G12600	UDP-N-acetylglucosamine (UAA) transporter family	sp|Q6BMV3|HUT1_DEBHA UDP-galactose transporter homolog 1 OS=Debaryomyces hansenii (strain ATCC 36239 / CBS 767 / JCM 1990 / NBRC 0083 / IGC 2968) OX=284592 GN=HUT1 PE=3 SV=2
Potra2n2c6137	1.39363	Upregulated	5	0.483	0.209	7.81868e-25	AT1G19600	pfkB-like carbohydrate kinase family protein	sp|Q93Z01|MIK_ARATH Inositol 3-kinase OS=Arabidopsis thaliana OX=3702 GN=At5g58730 PE=2 SV=1
Potra2n5c10711	1.39444	Upregulated	5	0.215	0.08	2.0408e-09	AT5G06300	Putative lysine decarboxylase family protein	sp|B2HS63|LOGH_MYCMM Cytokinin riboside 5'-monophosphate phosphoribohydrolase OS=Mycobacterium marinum (strain ATCC BAA-535 / M) OX=216594 GN=MMAR_4233 PE=1 SV=1
Potra2n16c30409	1.39466	Upregulated	5	0.254	0.098	2.18076e-11	AT5G01650	Tautomerase/MIF superfamily protein	sp|Q76BK2|MIF_XENLA Macrophage migration inhibitory factor OS=Xenopus laevis OX=8355 GN=mif PE=1 SV=1
Potra2n8c17264	1.39764	Upregulated	5	0.33	0.132	1.57245e-15	AT4G18640	Leucine-rich repeat protein kinase family protein|MRH1	sp|Q9SVN2|RLP47_ARATH Receptor-like protein 47 OS=Arabidopsis thaliana OX=3702 GN=RLP47 PE=3 SV=2
Potra2n4c9650	1.39907	Upregulated	5	0.945	0.646	1.2886e-72	AT4G15093	catalytic LigB subunit of aromatic ring-opening dioxygenase family	sp|O74741|DIOXL_SCHPO 4,5-DOPA dioxygenase extradiol-like protein OS=Schizosaccharomyces pombe (strain 972 / ATCC 24843) OX=284812 GN=SPBC1709.16c PE=3 SV=2
Potra2n8c17116	1.40448	Upregulated	5	0.143	0.053	2.82095e-05	AT3G55430	O-Glycosyl hydrolases family 17 protein	sp|Q9FZD0|CBX8D_ARATH Carbohydrate-binding X8 domain-containing protein OS=Arabidopsis thaliana OX=3702 GN=At1g26450 PE=2 SV=1
Potra2n14c27673	1.40449	Upregulated	5	0.21	0.075	4.94158e-10	AT2G32970	G1/S-specific cyclin-E protein
Potra2n2c4453	1.40739	Upregulated	5	0.217	0.077	1.64386e-10	AT3G21630	chitin elicitor receptor kinase 1|CERK1,LYSM RLK1	sp|P17948|VGFR1_HUMAN Vascular endothelial growth factor receptor 1 OS=Homo sapiens OX=9606 GN=FLT1 PE=1 SV=2
Potra2n1c3314	1.40783	Upregulated	5	0.471	0.189	9.2361e-26	AT1G53590	Calcium-dependent lipid-binding (CaLB domain) family protein|NTMC2T6.1,NTMC2TYPE6.1	sp|P70610|DOC2B_RAT Double C2-like domain-containing protein beta OS=Rattus norvegicus OX=10116 GN=Doc2b PE=1 SV=2
Potra2n1c70	1.41019	Upregulated	5	0.242	0.086	1.85574e-12	AT2G20142	Toll-Interleukin-Resistance (TIR) domain family protein
Potra2n8c17739	1.41381	Upregulated	5	0.254	0.084	8.89478e-15	AT1G68490	translocase subunit seca
Potra2n5c11205	1.41542	Upregulated	5	0.471	0.188	3.93967e-26	AT2G34300	S-adenosyl-L-methionine-dependent methyltransferases superfamily protein	sp|Q8GYW9|PMT4_ARATH Probable methyltransferase PMT4 OS=Arabidopsis thaliana OX=3702 GN=At1g13860 PE=2 SV=2
Potra2n4c9508	1.41564	Upregulated	5	0.423	0.157	8.06478e-25	AT3G02230	reversibly glycosylated polypeptide 1|ATRGP1,RGP1	sp|P85413|RGP1_PHODC Probable UDP-arabinopyranose mutase 1 (Fragments) OS=Phoenix dactylifera OX=42345 PE=1 SV=1
Potra2n17c31595	1.41748	Upregulated	5	0.148	0.052	4.68765e-06	AT5G64390	RNA-binding KH domain-containing protein|HEN4	sp|Q96I24|FUBP3_HUMAN Far upstream element-binding protein 3 OS=Homo sapiens OX=9606 GN=FUBP3 PE=1 SV=2
Potra2n14c27122	1.41848	Upregulated	5	0.533	0.239	4.1095e-27	AT2G46500	phosphoinositide 4-kinase gamma 4|ATPI4K GAMMA 4,PI4K GAMMA 4,UBDK GAMMA 4	sp|Q99M64|P4K2A_RAT Phosphatidylinositol 4-kinase type 2-alpha OS=Rattus norvegicus OX=10116 GN=Pi4k2a PE=1 SV=1
Potra2n9c19862	1.42186	Upregulated	5	0.236	0.087	5.32253e-11	AT1G07630	pol-like 5|PLL5	sp|Q8RXZ4|P2C18_ARATH Probable protein phosphatase 2C 18 OS=Arabidopsis thaliana OX=3702 GN=At1g79630 PE=2 SV=1
Potra2n689s36477	1.42589	Upregulated	5	0.584	0.271	2.70068e-30
Potra2n10c21437	1.42734	Upregulated	5	0.157	0.058	6.09488e-06	AT1G71040	Cupredoxin superfamily protein|LPR2	sp|P44847|FTSP_HAEIN Putative cell division protein FtsP OS=Haemophilus influenzae (strain ATCC 51907 / DSM 11121 / KW20 / Rd) OX=71421 GN=ftsP PE=5 SV=1
Potra2n15c28853	1.43479	Upregulated	5	0.134	0.048	4.64903e-05	AT1G73640	RAB GTPase homolog A6A|AtRABA6a,RABA6a	sp|Q5E9J3|RSLBB_BOVIN Ras-like protein family member 11B OS=Bos taurus OX=9913 GN=RASL11B PE=2 SV=1
Potra2n5c10498	1.43566	Upregulated	5	0.293	0.1	4.56013e-17	AT2G33580	Protein kinase superfamily protein	sp|P39073|SSN3_YEAST Meiotic mRNA stability protein kinase SSN3 OS=Saccharomyces cerevisiae (strain ATCC 204508 / S288c) OX=559292 GN=SSN3 PE=1 SV=3
Potra2n13c25744	1.43584	Upregulated	5	0.109	0.035	0.000161555
Potra2n2c5028	1.44107	Upregulated	5	0.122	0.044	0.000528865	AT4G00750	S-adenosyl-L-methionine-dependent methyltransferases superfamily protein	sp|Q3EC77|PMT5_ARATH Probable methyltransferase PMT5 OS=Arabidopsis thaliana OX=3702 GN=At2g03480 PE=2 SV=2
Potra2n5c11356	1.4452	Upregulated	5	0.829	0.44	2.17427e-58	AT4G08685	Pollen Ole e 1 allergen and extensin family protein|SAH7	sp|O82015|LIGV1_LIGVU Major pollen allergen Lig v 1 OS=Ligustrum vulgare OX=13597 PE=1 SV=2
Potra2n15c28419	1.44529	Upregulated	5	0.143	0.049	5.76638e-06	AT2G31880	Leucine-rich repeat protein kinase family protein|EVR,SOBIR1	sp|Q559T8|Y0701_DICDI Probable serine/threonine-protein kinase DDB_G0272282 OS=Dictyostelium discoideum OX=44689 GN=DDB_G0272282 PE=3 SV=1
Potra2n1c719	1.44568	Upregulated	5	0.732	0.382	3.18383e-40	AT5G28540	heat shock protein 70 (Hsp 70) family protein|BIP1	sp|P0A9X8|MREB_SHIFL Cell shape-determining protein MreB OS=Shigella flexneri OX=623 GN=mreB PE=3 SV=1
Potra2n19c33678	1.44708	Upregulated	5	0.418	0.164	1.89979e-22	AT5G47850	CRINKLY4 related 4|CCR4	sp|Q9LVP0|Y5639_ARATH Probable leucine-rich repeat receptor-like protein kinase At5g63930 OS=Arabidopsis thaliana OX=3702 GN=At5g63930 PE=1 SV=1
Potra2n8c17104	1.44926	Upregulated	5	0.993	0.809	1.64426e-121	AT5G02500	heat shock cognate protein 70-1|AT-HSC70-1,HSC70,HSC70-1,HSP70-1	sp|P86237|HS71L_MESAU Heat shock 70 kDa protein 1-like (Fragments) OS=Mesocricetus auratus OX=10036 GN=HSPA1L PE=1 SV=1
Potra2n10c22355	1.44927	Upregulated	5	0.453	0.167	8.38088e-28	AT4G16120	COBRA-like protein-7 precursor|ATSEB1,COBL7,SEB1	sp|Q75IW1|COBL2_ORYSJ COBRA-like protein 2 OS=Oryza sativa subsp. japonica OX=39947 GN=BC1L2 PE=2 SV=1
Potra2n1c1145	1.44995	Upregulated	5	0.275	0.099	1.53948e-14	AT1G32127	plant viral-response family protein	sp|Q60774|TM45A_MOUSE Transmembrane protein 45A OS=Mus musculus OX=10090 GN=Tmem45a PE=2 SV=1
Potra2n10c20748	1.45192	Upregulated	5	0.49	0.194	2.9121e-28	AT2G40095	Alpha/beta hydrolase related protein
Potra2n13c26245	1.45272	Upregulated	5	0.104	0.035	0.000996272	AT1G56560	Plant neutral invertase family protein	sp|Q9C560|INVF_ARATH Probable alkaline/neutral invertase F OS=Arabidopsis thaliana OX=3702 GN=INVF PE=2 SV=1
Potra2n14c27474	1.45424	Upregulated	5	0.15	0.058	6.2136e-05
Potra2n13c25171	1.45999	Upregulated	5	0.342	0.136	4.71597e-17	AT1G53050	Protein kinase superfamily protein	sp|P35969|VGFR1_MOUSE Vascular endothelial growth factor receptor 1 OS=Mus musculus OX=10090 GN=Flt1 PE=1 SV=1
Potra2n3c7089	1.46025	Upregulated	5	0.132	0.052	0.000796284	AT4G20170	glycosyltransferase family protein (DUF23)	sp|O22807|GALS1_ARATH Galactan beta-1,4-galactosyltransferase GALS1 OS=Arabidopsis thaliana OX=3702 GN=GALS1 PE=2 SV=2
Potra2n16c30072	1.46466	Upregulated	5	0.143	0.04	8.24146e-09	AT5G03160	DnaJ P58IPK-like protein|ATP58IPK,P58IPK	sp|P15705|STI1_YEAST Heat shock protein STI1 OS=Saccharomyces cerevisiae (strain ATCC 204508 / S288c) OX=559292 GN=STI1 PE=1 SV=1
Potra2n10c21303	1.46579	Upregulated	5	0.536	0.215	1.13506e-32
Potra2n7c15751	1.46933	Upregulated	5	0.497	0.184	2.62229e-32	AT5G09760	Plant invertase/pectin methylesterase inhibitor superfamily	sp|O81415|PME39_ARATH Probable pectinesterase/pectinesterase inhibitor 39 OS=Arabidopsis thaliana OX=3702 GN=PME39 PE=2 SV=1
Potra2n1c3583	1.47915	Upregulated	5	0.104	0.03	6.48055e-05	AT4G27290	S-locus lectin protein kinase family protein	sp|C0LGH3|Y5614_ARATH Probable LRR receptor-like serine/threonine-protein kinase At1g56140 OS=Arabidopsis thaliana OX=3702 GN=At1g56140 PE=2 SV=2
Potra2n5c10737	1.48227	Upregulated	5	0.584	0.238	8.59735e-37	AT4G24160	alpha/beta-Hydrolases superfamily protein	sp|P9WNH5|HSAD_MYCTU 4,5:9,10-diseco-3-hydroxy-5,9,17-trioxoandrosta-1(10),2-diene-4-oate hydrolase OS=Mycobacterium tuberculosis (strain ATCC 25618 / H37Rv) OX=83332 GN=hsaD PE=1 SV=1
Potra2n4c10368	1.48528	Upregulated	5	0.263	0.091	2.12728e-14	AT4G24330	hypothetical protein (DUF1682)	sp|Q6AZI2|CCD47_XENLA Coiled-coil domain-containing protein 47 OS=Xenopus laevis OX=8355 GN=ccdc47 PE=2 SV=1
Potra2n8c17356	1.48564	Upregulated	5	0.764	0.367	1.19462e-50	AT1G54320	LEM3 (ligand-effect modulator 3) family protein / CDC50 family protein	sp|A0ZT23|CC50C_PANTR Cell cycle control protein 50C OS=Pan troglodytes OX=9598 GN=TMEM30C PE=2 SV=2
Potra2n19c33348	1.48919	Upregulated	5	0.958	0.601	9.28521e-83	AT5G54490	pinoid-binding protein 1|PBP1	sp|O35648|CETN3_MOUSE Centrin-3 OS=Mus musculus OX=10090 GN=Cetn3 PE=1 SV=1
Potra2n2c5523	1.48994	Upregulated	5	0.605	0.257	3.56412e-37	AT1G78240	S-adenosyl-L-methionine-dependent methyltransferases superfamily protein|OSU1,QUA2,TSD2	sp|Q9LN50|PMTS_ARATH Probable methyltransferase PMT28 OS=Arabidopsis thaliana OX=3702 GN=At1g19430 PE=2 SV=1
Potra2n15c28992	1.49642	Upregulated	5	0.102	0.031	0.000255756	AT5G24090	chitinase A|ATCHIA,CHIA	sp|P23473|CHLY_PARTH Bifunctional chitinase/lysozyme (Fragment) OS=Parthenocissus quinquefolia OX=3607 PE=1 SV=1
Potra2n13c25157	1.49767	Upregulated	5	0.182	0.064	1.35028e-08	AT4G03550	glucan synthase-like 5|ATGSL05,ATGSL5,GSL05,GSL5,PMR4	sp|A2QLK4|FKS1_ASPNC 1,3-beta-glucan synthase component FKS1 OS=Aspergillus niger (strain CBS 513.88 / FGSC A1513) OX=425011 GN=fksA PE=3 SV=1
Potra2n1c2884	1.50014	Upregulated	5	0.254	0.069	3.71489e-19	AT3G03470	cytochrome P450, family 87, subfamily A, polypeptide 9|CYP89A9	sp|Q2MJ20|C7A12_MEDTR Beta-amyrin 28-monooxygenase OS=Medicago truncatula OX=3880 GN=CYP716A12 PE=1 SV=1
Potra2n7c15612	1.50136	Upregulated	5	0.111	0.033	1.93561e-05	AT5G35730	EXS (ERD1/XPR1/SYG1) family protein	sp|P16151|ERD1_YEAST Protein ERD1 OS=Saccharomyces cerevisiae (strain ATCC 204508 / S288c) OX=559292 GN=ERD1 PE=1 SV=3
Potra2n2c6276	1.50667	Upregulated	5	0.236	0.076	2.8054e-14	AT2G17787	cylicin
Potra2n8c16753	1.50736	Upregulated	5	0.12	0.04	8.39022e-05	AT5G04930	aminophospholipid ATPase 1|ALA1	sp|Q65X71|ACA6_ORYSJ Probable calcium-transporting ATPase 6, plasma membrane-type OS=Oryza sativa subsp. japonica OX=39947 GN=ACA6 PE=3 SV=1
Potra2n10c21315	1.50771	Upregulated	5	0.178	0.051	1.95059e-11	AT1G68580	Agenet and bromo-adjacent homology (BAH) domain-containing protein	sp|Q9FFA0|DUF10_ARATH DUF724 domain-containing protein 10 OS=Arabidopsis thaliana OX=3702 GN=DUF10 PE=2 SV=1
Potra2n1c3694	1.50796	Upregulated	5	0.104	0.031	0.000102233
Potra2n6c14636	1.50915	Upregulated	5	0.215	0.063	5.05785e-14	AT1G62440	leucine-rich repeat/extensin 2|LRX2	sp|Q9M8T0|Y3288_ARATH Probable inactive receptor kinase At3g02880 OS=Arabidopsis thaliana OX=3702 GN=At3g02880 PE=1 SV=1
Potra2n2c4172	1.51354	Upregulated	5	0.291	0.104	4.1193e-16	AT3G07320	O-Glycosyl hydrolases family 17 protein	sp|Q84V39|ALL10_OLEEU Major pollen allergen Ole e 10 OS=Olea europaea OX=4146 PE=1 SV=1
Potra2n12c24199	1.52176	Upregulated	5	0.159	0.053	6.28287e-08	AT1G68710	ATPase E1-E2 type family protein / haloacid dehalogenase-like hydrolase family protein	sp|Q92123|AT1A1_XENLA Sodium/potassium-transporting ATPase subunit alpha-1 OS=Xenopus laevis OX=8355 GN=atp1a1 PE=2 SV=1
Potra2n1c3076	1.52785	Upregulated	5	0.129	0.041	3.95224e-06	AT3G28450	Leucine-rich repeat protein kinase family protein	sp|Q9Z2W1|STK25_MOUSE Serine/threonine-protein kinase 25 OS=Mus musculus OX=10090 GN=Stk25 PE=1 SV=2
Potra2n12c24799	1.53141	Upregulated	5	0.182	0.062	4.46654e-09	AT5G51770	Protein kinase superfamily protein	sp|Q9SCU5|WNK5_ARATH Probable serine/threonine-protein kinase WNK5 OS=Arabidopsis thaliana OX=3702 GN=WNK5 PE=1 SV=2
Potra2n7c15819	1.53718	Upregulated	5	0.115	0.044	0.00380867	AT5G63840	Glycosyl hydrolases family 31 protein	sp|P19965|SP15_TETCF SITS-binding protein OS=Tetronarce californica OX=7787 PE=1 SV=2
Potra2n16c30248	1.54167	Upregulated	5	0.159	0.052	5.67395e-08	AT3G54040	PAR1 protein
Potra2n11c22512	1.54272	Upregulated	5	0.538	0.196	1.59486e-38	AT1G64720	Polyketide cyclase/dehydrase and lipid transport superfamily protein|CP5	sp|P53808|PPCT_MOUSE Phosphatidylcholine transfer protein OS=Mus musculus OX=10090 GN=Pctp PE=1 SV=2
Potra2n16c29368	1.54524	Upregulated	5	0.217	0.069	7.74117e-13	AT3G22142	Bifunctional inhibitor/lipid-transfer protein/seed storage 2S albumin superfamily protein	sp|Q9ZSP6|AIR1L_ARATH Putative lipid-binding protein AIR1B OS=Arabidopsis thaliana OX=3702 GN=AIR1B PE=3 SV=1
Potra2n10c22056	1.55058	Upregulated	5	0.122	0.042	9.41738e-05	AT1G60790	trichome birefringence-like protein (DUF828)|TBL2	sp|Q93ZA5|TBL46_ARATH Putative truncated protein trichome birefringence-like 46 OS=Arabidopsis thaliana OX=3702 GN=TBL46 PE=5 SV=1
Potra2n18c32973	1.55099	Upregulated	5	0.293	0.09	4.86382e-20	AT2G26640	3-ketoacyl-CoA synthase 11|KCS11	sp|P48391|2PS_GERHY 2-pyrone synthase OS=Gerbera hybrida OX=18101 GN=2PS PE=1 SV=2
Potra2n4c10218	1.55161	Upregulated	5	0.139	0.058	0.000866128	AT2G17220	Protein kinase superfamily protein	sp|Q5J4W4|MPK2_ORYSJ Mitogen-activated protein kinase 2 OS=Oryza sativa subsp. japonica OX=39947 GN=MPK2 PE=2 SV=1
Potra2n3c7241	1.55342	Upregulated	5	0.416	0.141	7.75018e-29
Potra2n1c831	1.55719	Upregulated	5	0.309	0.118	4.31605e-16	AT4G23500	Pectin lyase-like superfamily protein	sp|Q12554|PGLRC_ASPNG Probable endopolygalacturonase C OS=Aspergillus niger OX=5061 GN=pgaC PE=3 SV=1
Potra2n1c58	1.55932	Upregulated	5	0.113	0.039	0.000359679	AT3G13600	calmodulin-binding family protein	sp|Q9LFA4|IQM3_ARATH IQ domain-containing protein IQM3 OS=Arabidopsis thaliana OX=3702 GN=IQM3 PE=2 SV=1
Potra2n5c11188	1.56341	Upregulated	5	0.127	0.041	9.508e-06	AT4G19950	polyadenylate-binding protein 1-B-binding protein
Potra2n1c1595	1.56377	Upregulated	5	0.111	0.039	0.000842275	AT1G52320	kinesin-like protein	sp|Q93YU8|NRG2_ARATH Nitrate regulatory gene2 protein OS=Arabidopsis thaliana OX=3702 GN=NRG2 PE=1 SV=1
Potra2n15c28938	1.56745	Upregulated	5	0.339	0.1	7.54372e-25	AT5G37490	ARM repeat superfamily protein	sp|Q5UQ40|UBC4_MIMIV Probable bifunctional E2/E3 enzyme R795 OS=Acanthamoeba polyphaga mimivirus OX=212035 GN=MIMI_R795 PE=3 SV=1
Potra2n9c19918	1.57319	Upregulated	5	0.178	0.058	2.1096e-09	AT1G05575	transmembrane protein
Potra2n12c24304	1.58213	Upregulated	5	0.155	0.049	2.7734e-08	AT3G47780	ABC2 homolog 6|ATATH6,ATH6	sp|P45861|YWJA_BACSU Uncharacterized ABC transporter ATP-binding protein YwjA OS=Bacillus subtilis (strain 168) OX=224308 GN=ywjA PE=3 SV=1
Potra2n3c7587	1.5836	Upregulated	5	0.111	0.035	9.08396e-05	AT1G32350	alternative oxidase 1D	sp|Q8J0I8|AOX_YARLI Alternative oxidase, mitochondrial OS=Yarrowia lipolytica (strain CLIB 122 / E 150) OX=284591 GN=AOX PE=3 SV=1
Potra2n1c3184	1.59413	Upregulated	5	0.314	0.105	9.00549e-20	AT5G55480	SHV3-like 1|SVL1	sp|Q9SD81|GDPD6_ARATH Glycerophosphodiester phosphodiesterase GDPD6 OS=Arabidopsis thaliana OX=3702 GN=GDPD6 PE=2 SV=1
Potra2n14c27016	1.59608	Upregulated	5	0.106	0.032	5.82223e-05	AT2G46060	transmembrane protein-like protein
Potra2n2c5374	1.60212	Upregulated	5	0.111	0.036	0.000172656	AT1G58440	FAD/NAD(P)-binding oxidoreductase family protein|SQE1,XF1	sp|Q3S8R0|OXYE_STRRM 6-methylpretetramide 4-monooxygenase OS=Streptomyces rimosus OX=1927 GN=oxyE PE=1 SV=1
Potra2n13c26094	1.60682	Upregulated	5	0.337	0.107	5.79996e-24	AT3G05290	peroxisomal adenine nucleotide carrier 1|PNC1	sp|Q12251|YP011_YEAST Uncharacterized mitochondrial carrier YPR011C OS=Saccharomyces cerevisiae (strain ATCC 204508 / S288c) OX=559292 GN=YPR011C PE=1 SV=1
Potra2n2c4050	1.60904	Upregulated	5	0.122	0.035	6.16539e-07
Potra2n6c13336	1.61101	Upregulated	5	0.718	0.293	2.14182e-53	AT5G12010	nuclease	sp|Q5U538|HARB1_XENLA Putative nuclease HARBI1 OS=Xenopus laevis OX=8355 GN=harbi1 PE=2 SV=1
Potra2n13c25421	1.615	Upregulated	5	0.104	0.032	0.000141038	AT1G76690	12-oxophytodienoate reductase 2|ATOPR2,OPR2	sp|P0DN73|OYE_STRPG Uncharacterized oxidoreductase SpyM50865 OS=Streptococcus pyogenes serotype M5 (strain Manfredo) OX=160491 GN=SpyM50865 PE=1 SV=1
Potra2n5c11202	1.61768	Upregulated	5	0.284	0.093	3.46425e-18	AT1G21380	Target of Myb protein 1	sp|Q06336|GGA1_YEAST ADP-ribosylation factor-binding protein GGA1 OS=Saccharomyces cerevisiae (strain ATCC 204508 / S288c) OX=559292 GN=GGA1 PE=1 SV=1
Potra2n6c14907	1.61955	Upregulated	5	0.162	0.048	9.13388e-10	AT4G15550	indole-3-acetate beta-D-glucosyltransferase|IAGLU	sp|Q9LSY5|U71B7_ARATH UDP-glycosyltransferase 71B7 OS=Arabidopsis thaliana OX=3702 GN=UGT71B7 PE=2 SV=2
Potra2n10c21426	1.62114	Upregulated	5	0.201	0.064	1.06509e-11	AT2G01300	mediator of RNA polymerase II transcription subunit
Potra2n8c17115	1.63195	Upregulated	5	0.979	0.592	5.66425e-97	AT3G55430	O-Glycosyl hydrolases family 17 protein	sp|Q93V72|PDCB4_ARATH PLASMODESMATA CALLOSE-BINDING PROTEIN 4 OS=Arabidopsis thaliana OX=3702 GN=PDCB4 PE=1 SV=1
Potra2n9c19920	1.632	Upregulated	5	0.129	0.036	1.13916e-07	AT2G31955	cofactor of nitrate reductase and xanthine dehydrogenase 2|CNX2	sp|Q6N8F3|PQQE_RHOPA PqqA peptide cyclase OS=Rhodopseudomonas palustris (strain ATCC BAA-98 / CGA009) OX=258594 GN=pqqE PE=3 SV=1
Potra2n8c18349	1.63507	Upregulated	5	0.12	0.031	1.02469e-07	AT1G70620	cyclin-like protein
Potra2n2c5243	1.63521	Upregulated	5	0.104	0.03	4.89095e-05	AT1G47490	RNA-binding protein 47C|ATRBP47C,RBP47C	sp|Q03250|RBG7_ARATH Glycine-rich RNA-binding protein 7 OS=Arabidopsis thaliana OX=3702 GN=RBG7 PE=1 SV=1
Potra2n6c14997	1.63606	Upregulated	5	0.222	0.07	1.35475e-13	AT5G04170	Calcium-binding EF-hand family protein	sp|O14815|CAN9_HUMAN Calpain-9 OS=Homo sapiens OX=9606 GN=CAPN9 PE=1 SV=1
Potra2n19c33575	1.63958	Upregulated	5	0.323	0.1	9.31663e-23	AT5G09360	laccase 14|LAC14	sp|I6WZK7|MMCO_MYCTU Multicopper oxidase MmcO OS=Mycobacterium tuberculosis (strain ATCC 25618 / H37Rv) OX=83332 GN=mmcO PE=1 SV=1
Potra2n18c32622	1.64035	Upregulated	5	0.464	0.165	3.07965e-32
Potra2n3c7236	1.646	Upregulated	5	0.145	0.05	2.8617e-06	AT1G64390	glycosyl hydrolase 9C2|AtGH9C2,GH9C2	sp|P23666|GUN2_PERAE Endoglucanase 2 (Fragment) OS=Persea americana OX=3435 GN=CEL2 PE=2 SV=1
Potra2n14c27158	1.64876	Upregulated	5	0.106	0.035	0.000498137	AT2G46620	P-loop containing nucleoside triphosphate hydrolases superfamily protein	sp|P40341|YTA12_YEAST Mitochondrial respiratory chain complexes assembly protein YTA12 OS=Saccharomyces cerevisiae (strain ATCC 204508 / S288c) OX=559292 GN=YTA12 PE=1 SV=2
Potra2n13c25763	1.65015	Upregulated	5	0.353	0.131	1.54083e-20	AT1G64760	O-Glycosyl hydrolases family 17 protein	sp|P43070|BGL2_CANAX Glucan 1,3-beta-glucosidase OS=Candida albicans OX=5476 GN=BGL2 PE=3 SV=1
Potra2n5c12437	1.65195	Upregulated	5	0.233	0.068	3.17399e-16	AT1G08720	Protein kinase superfamily protein	sp|Q9LFA2|KIPK1_ARATH Serine/threonine-protein kinase KIPK1 OS=Arabidopsis thaliana OX=3702 GN=KIPK1 PE=1 SV=1
Potra2n6c13590	1.65529	Upregulated	5	0.397	0.132	5.10188e-28	AT4G37980	cinnamyl alcohol dehydrogenase 7|ATCAD7,CAD7,ELI3,ELI3-1	sp|A7RK30|QORL2_NEMVE Quinone oxidoreductase-like protein 2 homolog OS=Nematostella vectensis OX=45351 GN=v1g238856 PE=3 SV=1
Potra2n4c9969	1.65723	Upregulated	5	0.208	0.057	5.83949e-15	AT4G38650	Glycosyl hydrolase family 10 protein	sp|Q01176|XYN2_MAGGR Endo-1,4-beta-xylanase 2 OS=Magnaporthe grisea OX=148305 GN=XYL2 PE=1 SV=1
Potra2n4c9589	1.66039	Upregulated	5	0.254	0.086	1.01661e-14	AT4G39730	Lipase/lipooxygenase, PLAT/LH2 family protein	sp|Q2V2V3|PLAT3_ARATH PLAT domain-containing protein 3 OS=Arabidopsis thaliana OX=3702 GN=PLAT3 PE=4 SV=1
Potra2n10c20597	1.67018	Upregulated	5	0.199	0.056	1.36001e-13	AT2G39518	Uncharacterized protein family (UPF0497)	sp|Q5W6M3|CSPLG_ORYSJ CASP-like protein 4B4 OS=Oryza sativa subsp. japonica OX=39947 GN=Os05g0344400 PE=3 SV=1
Potra2n3c7124	1.67712	Upregulated	5	0.109	0.039	0.00150358
Potra2n4c9976	1.68088	Upregulated	5	0.968	0.608	2.55067e-98	AT2G17840	Senescence/dehydration-associated protein-like protein|ERD7	sp|Q9SD22|SDEH3_ARATH Senescence/dehydration-associated protein At3g51250 OS=Arabidopsis thaliana OX=3702 GN=At3g51250 PE=2 SV=1
Potra2n2c4494	1.68187	Upregulated	5	0.984	0.704	8.3178e-95	AT5G35735	Auxin-responsive family protein	sp|A2VE04|FRRS1_BOVIN Ferric-chelate reductase 1 OS=Bos taurus OX=9913 GN=FRRS1 PE=2 SV=1
Potra2n10c22317	1.68824	Upregulated	5	0.224	0.073	3.81763e-13
Potra2n18c32440	1.69114	Upregulated	5	0.127	0.033	2.57306e-08	AT4G25810	xyloglucan endotransglycosylase 6|XTH23,XTR6	sp|P33693|EXOK_RHIME Endo-1,3-1,4-beta-glycanase ExoK OS=Rhizobium meliloti (strain 1021) OX=266834 GN=exoK PE=1 SV=1
Potra2n16c30523	1.69219	Upregulated	5	0.192	0.051	3.54456e-14	AT3G51550	Malectin/receptor-like protein kinase family protein|FER	sp|Q54IP4|SHKB_DICDI Dual specificity protein kinase shkB OS=Dictyostelium discoideum OX=44689 GN=shkB PE=3 SV=1
Potra2n2c6336	1.69248	Upregulated	5	0.64	0.245	1.18613e-49
Potra2n5c10657	1.70245	Upregulated	5	0.113	0.033	5.86108e-06
Potra2n14c26441	1.70318	Upregulated	5	0.155	0.037	4.26564e-12
Potra2n1c2481	1.70391	Upregulated	5	0.113	0.034	1.15068e-05	AT5G10530	Concanavalin A-like lectin protein kinase family protein	sp|J9PBR3|LECA_BIOPE Lectin CPL OS=Bionia pedicellata OX=232302 PE=1 SV=1
Potra2n4c9970	1.70442	Upregulated	5	0.497	0.158	3.17634e-39	AT2G16660	Major facilitator superfamily protein	sp|F4I9E1|NFD4_ARATH Protein NUCLEAR FUSION DEFECTIVE 4 OS=Arabidopsis thaliana OX=3702 GN=NFD4 PE=3 SV=1
Potra2n1c3303	1.70603	Upregulated	5	0.644	0.252	1.23824e-49	AT1G78440	gibberellin 2-beta-dioxygenase|ATGA2OX1,GA2OX1	sp|P10621|IPNS_STRCL Isopenicillin N synthase OS=Streptomyces clavuligerus OX=1901 GN=pcbC PE=3 SV=1
Potra2n3c7401	1.70986	Upregulated	5	0.12	0.03	2.48465e-08	AT4G23030	MATE efflux family protein	sp|Q5KZL2|NORM_GEOKA Probable multidrug resistance protein NorM OS=Geobacillus kaustophilus (strain HTA426) OX=235909 GN=norM PE=3 SV=1
Potra2n1c1729	1.71239	Upregulated	5	0.111	0.028	3.60682e-07	AT1G72810	Pyridoxal-5'-phosphate-dependent enzyme family protein	sp|P09123|THRC_BACSL Threonine synthase OS=Bacillus sp. (strain ULM1) OX=231717 GN=thrC PE=3 SV=1
Potra2n16c30257	1.72247	Upregulated	5	0.247	0.071	4.59778e-18	AT2G37980	O-fucosyltransferase family protein	sp|Q0WPA5|MSR2_ARATH Protein MANNAN SYNTHESIS-RELATED 2 OS=Arabidopsis thaliana OX=3702 GN=MSR2 PE=2 SV=1
Potra2n4c8518	1.72357	Upregulated	5	0.924	0.451	1.14422e-87	AT4G04610	APS reductase 1|APR,APR1,ATAPR1,PRH19	sp|Q00216|TIGA_ASPNG Protein disulfide-isomerase tigA OS=Aspergillus niger OX=5061 GN=tigA PE=2 SV=1
Potra2n8c18231	1.7263	Upregulated	5	0.499	0.158	5.91045e-40	AT3G23920	beta-amylase 1|BAM1,BMY7,TR-BAMY	sp|P30271|AMYB_SECCE Beta-amylase (Fragment) OS=Secale cereale OX=4550 GN=BMY1 PE=2 SV=1
Potra2n10c20448	1.73873	Upregulated	5	0.12	0.029	1.26764e-08	AT1G50490	ubiquitin-conjugating enzyme 20|UBC20	sp|Q55EY8|UBE2W_DICDI Probable ubiquitin-conjugating enzyme E2 W OS=Dictyostelium discoideum OX=44689 GN=ube2w PE=3 SV=1
Potra2n12c24542	1.74702	Upregulated	5	0.102	0.024	5.58645e-07	AT3G01930	Major facilitator superfamily protein	sp|F4I9E1|NFD4_ARATH Protein NUCLEAR FUSION DEFECTIVE 4 OS=Arabidopsis thaliana OX=3702 GN=NFD4 PE=3 SV=1
Potra2n7c15864	1.75657	Upregulated	5	0.365	0.12	1.05592e-25	AT5G10350	RNA-binding (RRM/RBD/RNP motifs) family protein	sp|P42696|RBM34_HUMAN RNA-binding protein 34 OS=Homo sapiens OX=9606 GN=RBM34 PE=1 SV=2
Potra2n11c22643	1.76248	Upregulated	5	0.268	0.083	1.51666e-18	AT5G54800	glucose 6-phosphate/phosphate translocator 1|ATGPT1,GPT1	sp|Q54YK1|Y8631_DICDI Putative UDP-sugar transporter DDB_G0278631 OS=Dictyostelium discoideum OX=44689 GN=DDB_G0278631 PE=3 SV=2
Potra2n4c8757	1.76321	Upregulated	5	0.416	0.133	1.08258e-31	AT4G27460	Cystathionine beta-synthase (CBS) family protein	sp|Q8GXI9|PV42B_ARATH SNF1-related protein kinase regulatory subunit gamma-like PV42b OS=Arabidopsis thaliana OX=3702 GN=PV42B PE=2 SV=1
Potra2n6c14421	1.76678	Upregulated	5	0.12	0.031	8.37715e-08	AT5G01600	ferretin 1|ATFER1,FER1	sp|P41822|FRI_AEDAE Ferritin subunit OS=Aedes aegypti OX=7159 GN=FERH PE=1 SV=2
Potra2n9c19303	1.76769	Upregulated	5	0.201	0.044	3.36492e-18	AT2G14960	Auxin-responsive GH3 family protein|GH3.1	sp|Q8N2G8|GHDC_HUMAN GH3 domain-containing protein OS=Homo sapiens OX=9606 GN=GHDC PE=1 SV=2
Potra2n4c9298	1.77682	Upregulated	5	0.139	0.038	7.98985e-09	AT2G47485	hypothetical protein
Potra2n7c16152	1.78783	Upregulated	5	0.203	0.059	7.65052e-14	AT4G37640	calcium ATPase 2|ACA2	sp|Q9M3H5|HMA1_ARATH Probable cadmium/zinc-transporting ATPase HMA1, chloroplastic OS=Arabidopsis thaliana OX=3702 GN=HMA1 PE=2 SV=2
Potra2n7c16279	1.79118	Upregulated	5	0.169	0.047	2.23918e-11	AT4G37030	membrane protein	sp|Q8GUM4|Y3739_ARATH Uncharacterized membrane protein At3g27390 OS=Arabidopsis thaliana OX=3702 GN=At3g27390 PE=1 SV=2
Potra2n13c25024	1.79351	Upregulated	5	0.97	0.575	9.30963e-103	AT4G27280	Calcium-binding EF-hand family protein	sp|Q8S1Y9|CML1_ORYSJ Calmodulin-like protein 1 OS=Oryza sativa subsp. japonica OX=39947 GN=CML1 PE=2 SV=1
Potra2n1c3597	1.79362	Upregulated	5	0.115	0.031	6.8617e-07	AT3G20640	basic helix-loop-helix (bHLH) DNA-binding superfamily protein	sp|Q7XHI5|BH133_ARATH Transcription factor bHLH133 OS=Arabidopsis thaliana OX=3702 GN=BHLH133 PE=1 SV=1
Potra2n3c8339	1.80553	Upregulated	5	0.189	0.062	1.24243e-10	AT5G49940	NIFU-like protein 2|ATCNFU2,NFU2	sp|Q9LIG6|NIFU4_ARATH NifU-like protein 4, mitochondrial OS=Arabidopsis thaliana OX=3702 GN=NIFU4 PE=2 SV=1
Potra2n1c1219	1.8124	Upregulated	5	0.106	0.027	1.3299e-06	AT2G35230	VQ motif-containing protein	sp|O82170|IKU1_ARATH Protein HAIKU1 OS=Arabidopsis thaliana OX=3702 GN=IKU1 PE=1 SV=1
Potra2n5c10874	1.81329	Upregulated	5	0.91	0.428	3.60775e-88	AT5G63450	cytochrome P450, family 94, subfamily B, polypeptide 1|CYP94B1	sp|D5JBX0|GAO_HELAN Germacrene A hydroxylase OS=Helianthus annuus OX=4232 GN=GAO PE=1 SV=1
Potra2n703s36532	1.82222	Upregulated	5	0.136	0.037	9.34869e-09
Potra2n10c22051	1.82392	Upregulated	5	0.192	0.04	2.32484e-18	AT1G70530	cysteine-rich RLK (RECEPTOR-like protein kinase) 3	sp|Q6R2K2|SRF4_ARATH Protein STRUBBELIG-RECEPTOR FAMILY 4 OS=Arabidopsis thaliana OX=3702 GN=SRF4 PE=2 SV=1
Potra2n1c16	1.83183	Upregulated	5	0.141	0.034	7.46769e-11	AT5G56350	Pyruvate kinase family protein	sp|P19680|KPYK_SPICI Pyruvate kinase (Fragment) OS=Spiroplasma citri OX=2133 GN=pyk PE=3 SV=1
Potra2n8c18264	1.84437	Upregulated	5	0.18	0.044	9.58968e-15	AT1G27910	plant U-box 45|ATPUB45,PUB45	sp|Q0DR28|PUB57_ORYSJ U-box domain-containing protein 57 OS=Oryza sativa subsp. japonica OX=39947 GN=PUB57 PE=2 SV=1
Potra2n2c4159	1.84913	Upregulated	5	0.764	0.313	1.19569e-64	AT3G07390	auxin-induced in root cultures-like protein|AIR12	sp|Q8VYH6|B651B_ARATH Cytochrome b561 and DOMON domain-containing protein At4g17280 OS=Arabidopsis thaliana OX=3702 GN=At4g17280 PE=2 SV=1
Potra2n1c3106	1.86405	Upregulated	5	0.152	0.042	3.64832e-10
Potra2n10c21739	1.86562	Upregulated	5	0.261	0.065	4.88839e-23	AT3G22910	ATPase E1-E2 type family protein / haloacid dehalogenase-like hydrolase family protein	sp|P32660|ATC5_YEAST Phospholipid-transporting ATPase DNF1 OS=Saccharomyces cerevisiae (strain ATCC 204508 / S288c) OX=559292 GN=DNF1 PE=1 SV=2
Potra2n1c804	1.86772	Upregulated	5	0.273	0.078	6.07103e-21	AT1G64140	WRKY transcription factor	sp|Q9SZ67|WRK19_ARATH Probable WRKY transcription factor 19 OS=Arabidopsis thaliana OX=3702 GN=WRKY19 PE=3 SV=1
Potra2n10c20765	1.86924	Upregulated	5	0.855	0.387	6.20824e-82	AT5G05580	fatty acid desaturase 8|FAD8	sp|O34653|DES_BACSU Fatty acid desaturase OS=Bacillus subtilis (strain 168) OX=224308 GN=des PE=2 SV=1
Potra2n11c23033	1.87369	Upregulated	5	0.159	0.043	4.1846e-11	AT1G78440	gibberellin 2-beta-dioxygenase|ATGA2OX1,GA2OX1	sp|Q5MNI4|LOLO1_EPIUN 2-oxoglutarate-dependent dioxygenase lolO1 OS=Epichloe uncinata OX=5050 GN=lolO1 PE=2 SV=1
Potra2n14c27704	1.8803	Upregulated	5	0.584	0.189	9.15678e-53	AT5G14780	formate dehydrogenase	sp|P53100|YGT5_YEAST Putative 2-hydroxyacid dehydrogenase YGL185C OS=Saccharomyces cerevisiae (strain ATCC 204508 / S288c) OX=559292 GN=YGL185C PE=1 SV=1
Potra2n19c33298	1.8814	Upregulated	5	0.199	0.046	1.73645e-17	AT1G06890	nodulin MtN21 /EamA-like transporter family protein	sp|Q9LNH5|PT148_ARATH Probable sugar phosphate/phosphate translocator At1g48230 OS=Arabidopsis thaliana OX=3702 GN=At1g48230 PE=2 SV=2
Potra2n10c21700	1.91787	Upregulated	5	0.155	0.039	1.9452e-11	AT2G32030	Acyl-CoA N-acyltransferases (NAT) superfamily protein	sp|P40586|YIW2_YEAST Uncharacterized protein YIR042C OS=Saccharomyces cerevisiae (strain ATCC 204508 / S288c) OX=559292 GN=YIR042C PE=4 SV=1
Potra2n17c31209	1.92294	Upregulated	5	0.111	0.027	1.45833e-07	AT5G39785	hypothetical protein (DUF1666)
Potra2n15c28122	1.92682	Upregulated	5	0.672	0.218	3.08658e-64	AT5G62350	Plant invertase/pectin methylesterase inhibitor superfamily protein	sp|Q8GX86|PME21_ARATH Probable pectinesterase/pectinesterase inhibitor 21 OS=Arabidopsis thaliana OX=3702 GN=PME21 PE=2 SV=2
Potra2n6c14477	1.93334	Upregulated	5	0.446	0.132	1.24523e-39	AT2G38120	Transmembrane amino acid transporter family protein	sp|F4HW02|GAT1_ARATH GABA transporter 1 OS=Arabidopsis thaliana OX=3702 GN=GAT1 PE=1 SV=1
Potra2n15c28079	1.94258	Upregulated	5	0.118	0.033	8.11928e-07	AT5G62190	DEAD box RNA helicase (PRH75)|PRH75	sp|Q1RKN3|TLH2_SCHPO ATP-dependent DNA helicase tlh2 OS=Schizosaccharomyces pombe (strain 972 / ATCC 24843) OX=284812 GN=tlh2 PE=2 SV=1
Potra2n13c25570	1.94424	Upregulated	5	0.273	0.072	7.62024e-23
Potra2n10c22118	1.95666	Upregulated	5	0.494	0.134	7.86195e-49	AT1G10370	Glutathione S-transferase family protein|ATGSTU17,ERD9,GST30,GST30B	sp|Q9VHD3|MAAI1_DROME Probable maleylacetoacetate isomerase 1 OS=Drosophila melanogaster OX=7227 GN=GstZ1 PE=1 SV=1
Potra2n8c18093	1.96936	Upregulated	5	0.508	0.147	3.19329e-47	AT3G22910	ATPase E1-E2 type family protein / haloacid dehalogenase-like hydrolase family protein	sp|Q9N0Z4|AT11B_RABIT Probable phospholipid-transporting ATPase IF (Fragment) OS=Oryctolagus cuniculus OX=9986 GN=ATP11B PE=1 SV=2
Potra2n9c19096	1.97472	Upregulated	5	0.132	0.03	2.11462e-10	AT2G16250	Leucine-rich repeat protein kinase family protein	sp|P00529|ROS_AVISU Tyrosine-protein kinase transforming protein ros OS=UR2 sarcoma virus OX=354090 GN=V-ROS PE=3 SV=1
Potra2n5c11027	1.98247	Upregulated	5	0.383	0.112	2.15083e-32	AT3G59080	Eukaryotic aspartyl protease family protein	sp|P69477|NEP2_NEPDI Aspartic proteinase nepenthesin-2 (Fragments) OS=Nepenthes distillatoria OX=122309 PE=1 SV=1
Potra2n2c5696	1.98351	Upregulated	5	0.111	0.03	9.18264e-07	AT3G24590	plastidic type i signal peptidase 1|PLSP1	sp|Q1RHA1|LEP_RICBR Signal peptidase I OS=Rickettsia bellii (strain RML369-C) OX=336407 GN=lepB PE=3 SV=1
Potra2n15c28621	1.9861	Upregulated	5	0.173	0.046	8.66752e-13	AT5G62620	Galactosyltransferase family protein	sp|Q24157|BRN_DROME Beta-1,3-galactosyltransferase brn OS=Drosophila melanogaster OX=7227 GN=brn PE=2 SV=2
Potra2n14c26369	1.99239	Upregulated	5	0.388	0.11	5.26958e-33	AT3G49780	phytosulfokine 4 precursor|ATPSK3 (FORMER SYMBOL),ATPSK4,PSK4	sp|Q9SZG4|PSK4_ARATH Putative phytosulfokines 4 OS=Arabidopsis thaliana OX=3702 GN=PSK4 PE=3 SV=1
Potra2n14c27675	2.01567	Upregulated	5	0.388	0.109	9.22763e-34	AT2G05790	O-Glycosyl hydrolases family 17 protein	sp|Q93V72|PDCB4_ARATH PLASMODESMATA CALLOSE-BINDING PROTEIN 4 OS=Arabidopsis thaliana OX=3702 GN=PDCB4 PE=1 SV=1
Potra2n8c18265	2.0221	Upregulated	5	0.129	0.032	2.33602e-09	AT1G24330	ARM repeat superfamily protein	sp|Q757R0|VAC8_ASHGO Vacuolar protein 8 OS=Ashbya gossypii (strain ATCC 10895 / CBS 109.51 / FGSC 9923 / NRRL Y-1056) OX=284811 GN=VAC8 PE=3 SV=3
Potra2n4c9942	2.04958	Upregulated	5	0.152	0.035	5.96437e-13	AT4G38710	glycine-rich protein	sp|Q9AUJ7|IF4B1_WHEAT Eukaryotic translation initiation factor 4B1 OS=Triticum aestivum OX=4565 GN=EIF4B PE=1 SV=1
Potra2n6c12957	2.0583	Upregulated	5	0.148	0.039	1.63171e-10	AT4G31860	Protein phosphatase 2C family protein	sp|Q9WTR8|PHLP1_RAT PH domain leucine-rich repeat protein phosphatase 1 OS=Rattus norvegicus OX=10116 GN=Phlpp1 PE=1 SV=1
Potra2n11c23358	2.06174	Upregulated	5	0.118	0.021	1.34996e-11	AT3G09010	Protein kinase superfamily protein	sp|P00529|ROS_AVISU Tyrosine-protein kinase transforming protein ros OS=UR2 sarcoma virus OX=354090 GN=V-ROS PE=3 SV=1
Potra2n6c14878	2.07641	Upregulated	5	0.185	0.039	6.63175e-18	AT5G06860	polygalacturonase inhibiting protein 1|ATPGIP1,PGIP1	sp|Q9XIB6|PLRX2_ARATH Pollen-specific leucine-rich repeat extensin-like protein 2 OS=Arabidopsis thaliana OX=3702 GN=PEX2 PE=1 SV=1
Potra2n2c4359	2.07904	Upregulated	5	0.104	0.023	6.41934e-08	AT3G59310	solute carrier family 35 protein (DUF914)	sp|O59785|YCN8_SCHPO Uncharacterized solute carrier family 35 member C320.08 OS=Schizosaccharomyces pombe (strain 972 / ATCC 24843) OX=284812 GN=SPCC320.08 PE=1 SV=1
Potra2n8c18092	2.12333	Upregulated	5	0.356	0.091	2.96431e-34	AT3G22890	ATP sulfurylase 1|APS1	sp|Q54506|SAT_RIFPS Sulfate adenylyltransferase OS=Riftia pachyptila sulfur-oxidizing endosymbiont OX=35843 GN=sat PE=1 SV=1
Potra2n12c23995	2.12521	Upregulated	5	0.282	0.072	2.81535e-25	AT5G24090	chitinase A|ATCHIA,CHIA	sp|P23473|CHLY_PARTH Bifunctional chitinase/lysozyme (Fragment) OS=Parthenocissus quinquefolia OX=3607 PE=1 SV=1
Potra2n14c27241	2.15364	Upregulated	5	0.12	0.026	6.78496e-10	AT4G01700	Chitinase family protein	sp|Q06015|CHI3_ARAHY Endochitinase 3 (Fragment) OS=Arachis hypogaea OX=3818 PE=2 SV=1
Potra2n13c25312	2.18626	Upregulated	5	0.157	0.03	1.14332e-15
Potra2n6c13327	2.22198	Upregulated	5	0.323	0.067	3.0719e-36	AT4G33050	calmodulin-binding family protein|EDA39	sp|Q9LFA4|IQM3_ARATH IQ domain-containing protein IQM3 OS=Arabidopsis thaliana OX=3702 GN=IQM3 PE=2 SV=1
Potra2n8c17392	2.2295	Upregulated	5	0.162	0.035	1.02951e-14	AT2G02990	ribonuclease 1|ATRNS1,RNS1	sp|P24657|RNTR_HYPRU Ribonuclease Trv OS=Hypocrea rufa OX=5547 PE=1 SV=1
Potra2n10c20147	2.27309	Upregulated	5	0.115	0.027	1.16662e-08	AT3G21180	autoinhibited Ca(2+)-ATPase 9|ACA9,ATACA9	sp|Q12697|YPK9_YEAST Vacuolar cation-transporting ATPase YPK9 OS=Saccharomyces cerevisiae (strain ATCC 204508 / S288c) OX=559292 GN=YPK9 PE=1 SV=1
Potra2n18c32145	2.30965	Upregulated	5	0.508	0.133	2.6345e-55	AT2G31050	Cupredoxin superfamily protein	sp|Q9T076|ENL2_ARATH Early nodulin-like protein 2 OS=Arabidopsis thaliana OX=3702 GN=At4g27520 PE=1 SV=1
Potra2n10c21253	2.31537	Upregulated	5	0.136	0.027	5.72586e-13	AT1G68690	Protein kinase superfamily protein	sp|Q6FKC6|SSN3_CANGA Serine/threonine-protein kinase SSN3 OS=Candida glabrata (strain ATCC 2001 / CBS 138 / JCM 3761 / NBRC 0622 / NRRL Y-65) OX=284593 GN=SSN3 PE=3 SV=1
Potra2n3c6974	2.33567	Upregulated	5	0.125	0.022	7.6058e-13	AT5G13110	glucose-6-phosphate dehydrogenase 2|G6PD2	sp|Q24625|G6PD_DROSI Glucose-6-phosphate 1-dehydrogenase (Fragment) OS=Drosophila simulans OX=7240 GN=Zw PE=2 SV=1
Potra2n2c4957	2.34675	Upregulated	5	0.552	0.147	3.67471e-61	AT5G41340	ubiquitin conjugating enzyme 4|ATUBC4,UBC4	sp|O00102|UBC7_SCHPO Ubiquitin-conjugating enzyme E2-18 kDa OS=Schizosaccharomyces pombe (strain 972 / ATCC 24843) OX=284812 GN=ubc7 PE=1 SV=2
Potra2n1c3259	2.36261	Upregulated	5	0.85	0.339	2.2268e-107	AT4G05390	root FNR 1|ATRFNR1,RFNR1	sp|Q6NRG5|NDOR1_XENLA NADPH-dependent diflavin oxidoreductase 1 OS=Xenopus laevis OX=8355 GN=ndor1 PE=2 SV=1
Potra2n3c7061	2.38257	Upregulated	5	0.402	0.096	6.35248e-44	AT5G47910	respiratory burst oxidase homologue D|ATRBOHD,RBOHD	sp|O94727|FRP2_SCHPO Ferric/cupric reductase transmembrane component 2 OS=Schizosaccharomyces pombe (strain 972 / ATCC 24843) OX=284812 GN=frp2 PE=3 SV=1
Potra2n15c27988	2.42045	Upregulated	5	0.48	0.121	1.79046e-54	AT5G23760	Copper transport protein family	sp|O03982|HIP39_ARATH Heavy metal-associated isoprenylated plant protein 39 OS=Arabidopsis thaliana OX=3702 GN=HIPP39 PE=2 SV=1
Potra2n5c10921	2.4297	Upregulated	5	0.236	0.044	2.75659e-27	AT3G22930	calmodulin-like 11	sp|Q54IY3|CETNA_DICDI Centrin-A OS=Dictyostelium discoideum OX=44689 GN=cenA PE=3 SV=1
Potra2n1c3481	2.43306	Upregulated	5	0.109	0.022	2.51407e-09	AT5G53870	early nodulin-like protein 1	sp|P93329|NO20_MEDTR Early nodulin-20 OS=Medicago truncatula OX=3880 GN=ENOD20 PE=3 SV=1
Potra2n4c9465	2.44036	Upregulated	5	0.303	0.064	1.04335e-33	AT3G47520	malate dehydrogenase|MDH	sp|C0MFB5|LDH_STRS7 L-lactate dehydrogenase OS=Streptococcus equi subsp. zooepidemicus (strain H70) OX=553483 GN=ldh PE=3 SV=1
Potra2n6c12893	2.45535	Upregulated	5	0.249	0.053	2.78313e-26	AT2G24520	plasma membrane H+-ATPase	sp|Q8YPE9|KDPB1_NOSS1 Potassium-transporting ATPase ATP-binding subunit 1 OS=Nostoc sp. (strain PCC 7120 / SAG 25.82 / UTEX 2576) OX=103690 GN=kdpB1 PE=3 SV=1
Potra2n1c2120	2.4779	Upregulated	5	0.109	0.018	2.33631e-11	AT2G29260	NAD(P)-binding Rossmann-fold superfamily protein	sp|Q03326|OXIR_STRAT Probable oxidoreductase OS=Streptomyces antibioticus OX=1890 PE=3 SV=1
Potra2n14c27006	2.49792	Upregulated	5	0.975	0.406	2.68425e-157	AT3G61440	cysteine synthase C1|ARATH;BSAS3;1,ATCYSC1,CYSC1	sp|Q2YY67|TDCB_STAAB L-threonine dehydratase catabolic TdcB OS=Staphylococcus aureus (strain bovine RF122 / ET3-1) OX=273036 GN=tdcB PE=3 SV=2
Potra2n1c796	2.61812	Upregulated	5	0.427	0.084	1.00872e-55	AT5G41670	6-phosphogluconate dehydrogenase family protein	sp|Q55702|Y229_SYNY3 Uncharacterized oxidoreductase slr0229 OS=Synechocystis sp. (strain PCC 6803 / Kazusa) OX=1111708 GN=slr0229 PE=3 SV=1
Potra2n6c14777	2.62016	Upregulated	5	0.423	0.08	1.06683e-56	AT2G31050	Cupredoxin superfamily protein	sp|Q5JNJ5|ENL1_ORYSJ Early nodulin-like protein 1 OS=Oryza sativa subsp. japonica OX=39947 GN=ENODL1 PE=1 SV=1
Potra2n1c3307	2.63788	Upregulated	5	0.104	0.016	2.65423e-11	AT1G17110	ubiquitin-specific protease 15	sp|Q8BW70|UBP38_MOUSE Ubiquitin carboxyl-terminal hydrolase 38 OS=Mus musculus OX=10090 GN=Usp38 PE=1 SV=2
Potra2n5c12621	2.69208	Upregulated	5	0.995	0.541	1.44106e-182	AT5G27760	Hypoxia-responsive family protein
Potra2n5c11037	2.73053	Upregulated	5	0.148	0.027	8.12179e-16	AT3G59090	tobamovirus multiplication protein
Potra2n700s36526	2.79243	Upregulated	5	0.249	0.039	1.72068e-33	AT5G40850	urophorphyrin methylase 1	sp|P21639|COBI_SINSX Precorrin-2 C(20)-methyltransferase OS=Sinorhizobium sp. OX=42445 GN=cobI PE=1 SV=2
Potra2n7c16382	2.81032	Upregulated	5	0.115	0.013	3.2026e-16	AT4G36670	Major facilitator superfamily protein	sp|Q5RC45|S22AO_PONAB Steroid transmembrane transporter SLC22A24 OS=Pongo abelii OX=9601 GN=SLC22A24 PE=2 SV=1
Potra2n9c18867	2.87452	Upregulated	5	0.143	0.022	2.09747e-17	AT2G17120	lysm domain GPI-anchored protein 2 precursor|LYM2	sp|O64825|LYK4_ARATH LysM domain receptor-like kinase 4 OS=Arabidopsis thaliana OX=3702 GN=LYK4 PE=1 SV=1
Potra2n9c18689	2.90744	Upregulated	5	0.958	0.415	2.19235e-162	AT2G27510	ferredoxin 3|ATFD3,FD3	sp|P23101|XYLZ_PSEPU Toluate 1,2-dioxygenase electron transfer component OS=Pseudomonas putida OX=303 GN=xylZ PE=3 SV=1
Potra2n15c28993	2.97082	Upregulated	5	0.12	0.012	8.54552e-18	AT5G24090	chitinase A|ATCHIA,CHIA	sp|D4AT07|CHI1_ARTBC Probable endochitinase ARB_07371 OS=Arthroderma benhamiae (strain ATCC MYA-4681 / CBS 112371) OX=663331 GN=ARB_07371 PE=3 SV=1
Potra2n9c19486	3.00931	Upregulated	5	0.206	0.031	2.78813e-27	AT3G52140	tetratricopeptide repeat (TPR)-containing protein	sp|Q7Z494|NPHP3_HUMAN Nephrocystin-3 OS=Homo sapiens OX=9606 GN=NPHP3 PE=1 SV=1
Potra2n1c827	3.08351	Upregulated	5	0.587	0.099	1.76684e-97	AT1G63940	monodehydroascorbate reductase 6|MDAR6	sp|Q5NVA2|TRXR1_PONAB Thioredoxin reductase 1, cytoplasmic OS=Pongo abelii OX=9601 GN=TXNRD1 PE=2 SV=3
Potra2n3c7270	3.2213	Upregulated	5	0.614	0.107	8.51116e-105	AT5G41670	6-phosphogluconate dehydrogenase family protein	sp|Q55702|Y229_SYNY3 Uncharacterized oxidoreductase slr0229 OS=Synechocystis sp. (strain PCC 6803 / Kazusa) OX=1111708 GN=slr0229 PE=3 SV=1
Potra2n1c494	3.53049	Upregulated	5	0.644	0.098	1.00252e-122	AT5G13110	glucose-6-phosphate dehydrogenase 2|G6PD2	sp|Q24625|G6PD_DROSI Glucose-6-phosphate 1-dehydrogenase (Fragment) OS=Drosophila simulans OX=7240 GN=Zw PE=2 SV=1
Potra2n5c11357	3.76455	Upregulated	5	0.203	0.014	4.96643e-39	AT1G22170	Phosphoglycerate mutase family protein	sp|F4KI56|SERCL_ARATH Metal-independent phosphoserine phosphatase OS=Arabidopsis thaliana OX=3702 GN=IPSP PE=1 SV=1
Potra2n4c10189	3.85048	Upregulated	5	0.915	0.203	3.92629e-191	AT2G27510	ferredoxin 3|ATFD3,FD3	sp|P23101|XYLZ_PSEPU Toluate 1,2-dioxygenase electron transfer component OS=Pseudomonas putida OX=303 GN=xylZ PE=3 SV=1
Potra2n9c19175	3.91747	Upregulated	5	0.206	0.014	9.21674e-40
Potra2n15c28059	3.97416	Upregulated	5	0.12	0.005	1.93794e-24	AT4G23030	MATE efflux family protein	sp|Q88CB9|NORM_PSEPK Probable multidrug resistance protein NorM OS=Pseudomonas putida (strain ATCC 47054 / DSM 6125 / NCIMB 11950 / KT2440) OX=160488 GN=norM PE=3 SV=1
Potra2n10c21610	4.09999	Upregulated	5	0.122	0.011	3.89095e-20	AT1G70260	nodulin MtN21 /EamA-like transporter family protein	sp|F4HZQ7|WTR5_ARATH WAT1-related protein At1g21890 OS=Arabidopsis thaliana OX=3702 GN=At1g21890 PE=2 SV=1
Potra2n6c14450	4.37089	Upregulated	5	0.122	0.006	2.78177e-24	AT5G05600	2-oxoglutarate (2OG) and Fe(II)-dependent oxygenase superfamily protein	sp|A0A4P8GG75|EUPC_PHOSX 2-oxoglutarate-dependent dioxygenase eupC OS=Phoma sp. OX=1707701 GN=eupC PE=1 SV=1
Potra2n9c19145	5.33134	Upregulated	5	0.658	0.032	1.39394e-173	AT2G16070	plastid division2|PDV2	sp|Q9FK13|PDV1_ARATH Plastid division protein PDV1 OS=Arabidopsis thaliana OX=3702 GN=PDV1 PE=1 SV=1
Potra2n12c24699	1.64547	Upregulated	6	0.174	0.057	8.5815e-09	AT5G45110	NPR1-like protein 3	sp|Q25338|LITD_LATTR Delta-latroinsectotoxin-Lt1a OS=Latrodectus tredecimguttatus OX=6925 PE=1 SV=1	ABTB
Potra2n10c21288	1.02442	Upregulated	6	0.344	0.158	5.19401e-11	AT1G13260	related to ABI3/VP1 1|EDF4,RAV1	sp|Q9AWS7|Y1407_ORYSJ Putative AP2/ERF and B3 domain-containing protein Os01g0140700 OS=Oryza sativa subsp. japonica OX=39947 GN=Os01g0140700 PE=3 SV=1	AP2-EREBP
Potra2n5c12161	1.03887	Upregulated	6	0.136	0.049	0.00024139	AT1G78080	related to AP2 4|RAP2.4	sp|P82280|RAV2_ARATH AP2/ERF and B3 domain-containing transcription repressor RAV2 OS=Arabidopsis thaliana OX=3702 GN=RAV2 PE=1 SV=1	AP2-EREBP
Potra2n2c4582	1.0789	Upregulated	6	0.554	0.282	1.89592e-21	AT3G16770	ethylene-responsive element binding protein|ATEBP,EBP,ERF72,RAP2.3	sp|Q9ZWM9|RAV1_ARATH AP2/ERF and B3 domain-containing transcription factor RAV1 OS=Arabidopsis thaliana OX=3702 GN=RAV1 PE=1 SV=1	AP2-EREBP
Potra2n7c16270	1.25198	Upregulated	6	0.376	0.144	1.46181e-18				AP2-EREBP
Potra2n13c25445	1.33384	Upregulated	6	0.61	0.263	2.76769e-35	AT1G71520	Integrase-type DNA-binding superfamily protein	sp|O49515|ERF91_ARATH Ethylene-responsive transcription factor ERF091 OS=Arabidopsis thaliana OX=3702 GN=ERF091 PE=1 SV=1	AP2-EREBP
Potra2n5c12062	1.5506	Upregulated	6	0.833	0.412	2.02638e-69	AT5G64750	Integrase-type DNA-binding superfamily protein|ABR1	sp|Q84TB5|AP22_ORYSJ APETALA2-like protein 2 OS=Oryza sativa subsp. japonica OX=39947 GN=AP2-2 PE=1 SV=1	AP2-EREBP
Potra2n15c29002	1.69042	Upregulated	6	0.106	0.023	3.79715e-07	AT4G27950	cytokinin response factor 4|CRF4	sp|Q8H443|AP23_ORYSJ APETALA2-like protein 3 OS=Oryza sativa subsp. japonica OX=39947 GN=AP2-3 PE=1 SV=1	AP2-EREBP
Potra2n13c25901	1.87611	Upregulated	6	0.118	0.025	1.79003e-08	AT3G23240	ethylene response factor 1|ATERF1,ERF1	sp|Q9FGC9|EF121_ARATH Putative ethylene-responsive transcription factor ERF121 OS=Arabidopsis thaliana OX=3702 GN=ERF121 PE=3 SV=1	AP2-EREBP
[truncated: 2,384 more rows]

## Sheet: S2F
GOs for all differentially expressed genes in scRNA-seq data						GOs for all cluster-wise differentially expressed genes
[truncated: 101 more rows]

[truncated: 1 more sheets: S2G]
